# Supplementary material for: Large scale genomic and transcriptomic profiles of rice hybrids revealed a novel universal mechanism underlying yield heterosis
Source: Research Square preprint supplement (doi:10.21203/rs.3.rs-753426/v1), 2021-08-17
Supplement: Supplementary file 6 [file 805f8492e50f6c42ec37a095.xlsx]

## Sheet: Sheet1
Supplementary Table 13 The overlapped candidate genes within the QTLs with different genetic effect types between testers, subspecies and envrionments
Trait	Number of candidate genes					Different testers									Different subspecies									Different environments
	ND	PD	NOD	POD		ND-Nip	PD-Nip	NOD-Nip	POD-Nip	ND-9311	PD-9311	NOD-9311	POD-9311		ND-I	PD-I	NOD-I	POD-I	ND-J	PD-J	NOD-J	POD-J		ND-CS	PD-CS	NOD-CS	POD-CS	ND-SY	PD-SY	NOD-SY	POD-SY
PBP	47	147	64	479		0.89**	0.34**	0.23**	0.89**	0	0	0	0		0.11	0	0.63**	0	0	0.29**	0.02	0.22**		0.11	0.28**	0.16	0.01	0	0	0.63**	0.63**
SBP	82	106	214	663		0.12	0.99**	0.87**	0.93**	0.52**	0	0	0.02		0	0.03	0.88**	0	0.52**	0.01	0	0.62**		0	0.03	0.88**	0.32	0.12	0.96**	0	0.3
SPP	6	139	338	449		0	0.96**	0.91**	0.39**	0	0	0	0.04		0	0	0.99**	0.15	0	0.81**	0.01	0.2		0	0	0.78**	0.11	1.00**	0.81**	0	0.07
KGW	320	61	427	541		0.46**	0.67**	0.6**	0.48**	0	0.15	0.28	0		0.06	0	0.13	0.24**	0.65**	0.15	0.3**	0		0.42**	0	0.03	0.09	0.23	0.15	0.21**	0.38**
PNP	0	0	1510	1140		-	-	0.85**	0.82**	-	-	0	0.01		-	-	0.82**	0.07	-	-	0.03	0.08		-	-	0.05	0	-	-	0.21**	0.46**
Total	455	453	2553	3311		0.44**	0.73**	0.8**	0.73**	0.09	0.02	0.05	0.01		0.05	0.01	0.73**	0.09	0.55**	0.36**	0.07	0.21**		0.31**	0.1	0.21**	0.1	0.2	0.49**	0.17	0.39**
Note: ND,negative dominance; NOD, negative overdominance; PD, positive dominance, POD, positive overdominance; CS, Changsha environment; SY, Sanya environment; I, indica subspecies; J japonica subspecies;
