# Supplementary material for: Large scale genomic and transcriptomic profiles of rice hybrids revealed a novel universal mechanism underlying yield heterosis
Source: Research Square preprint supplement (doi:10.21203/rs.3.rs-753426/v1), 2021-08-17
Supplement: Supplementary file 7 [file 91a417037cc0b1c4cdc9accb.xlsx]

## Sheet: Supplementary Table 2a
Supplementary Table 2a The phenotypic data used in the current study.
Accession ID	Subspecies	Location	Data type	PBP	SBP	SPP	PNP	GWP	KGW
9311	indica	Changsha	Parent	14.048	42.1727	214.52	11.5011	36.0177	24.2922
Nipponbare	japonica	Changsha	Parent	10.3606	19.6704	117.688	15.232	20.3312	20.5485
B001	japonica	Changsha	Parent	NA	NA	NA	NA	NA	NA
B002	japonica	Changsha	Parent	10.6	18.5	120.8	26	28.09	19.1333
B003	japonica	Changsha	Parent	11.9	32.9	159.4	9.875	24.0375	22.5111
B004	japonica	Changsha	Parent	10.6	18.9667	124	14.125	23.9	22.4611
B005	japonica	Changsha	Parent	10.1	16.7	104.3	12.375	15.3317	18.4722
B006	indica	Changsha	Parent	NA	NA	NA	NA	NA	NA
B007	indica	Changsha	Parent	9.6	19.4	107.6	14.25	25.165	21.9611
B008	japonica	Changsha	Parent	15.875	41.25	203.275	17.5	21.41	18.2222
B009	indica	Changsha	Parent	10.4	17.9	103.5	13	12.8275	21.0778
B010	indica	Changsha	Parent	11	23	131.9	18.75	40.67	21.2389
B011	indica	Changsha	Parent	16.025	46.1	252.4	18.3333	52.64	18.5111
B012	indica	Changsha	Parent	NA	NA	NA	15.5	NA	NA
B013	indica	Changsha	Parent	12.9	45.7	239.5	14.3333	45.65	20.0667
B014	japonica	Changsha	Parent	13.5	52.2	262.2	11.6667	41.6967	22.1778
B015	indica	Changsha	Parent	12.7	30	172.2	14.1667	37.7933	20.3389
B016	japonica	Changsha	Parent	9.3	21.1	116.2	17.1667	33.725	24.0722
B017	japonica	Changsha	Parent	10.4	26.9	145	17.0833	46.1667	26.3889
B018	japonica	Changsha	Parent	17.275	44.35	259.125	10.1667	24.7533	19.1167
B019	indica	Changsha	Parent	15	23	168	12.5	16.93	20.5222
B020	indica	Changsha	Parent	15.8	52.8	297.1	13.5833	31.04	18.6278
B021	indica	Changsha	Parent	NA	NA	NA	22.5833	NA	NA
B023	japonica	Changsha	Parent	11.425	22.325	142.575	13.8333	23.9825	19.75
B024	indica	Changsha	Parent	13.7	34	180.3	NA	NA	NA
B025	japonica	Changsha	Parent	15.9	41.4	246.5	6.83333	19.6983	20.9056
B026	indica	Changsha	Parent	15.875	39.625	206.85	12.1667	21.305	20.9556
B027	indica	Changsha	Parent	15.6	22	184.5	11	26.9333	20.8944
B028	indica	Changsha	Parent	12.3	32.8	176.9	14.0833	35.1217	22.5722
B029	indica	Changsha	Parent	8.8	11.1	85.8	23.7083	25.5188	18.0111
B030	indica	Changsha	Parent	14.6	68	338.6	14	58.3867	22.4111
B031	indica	Changsha	Parent	NA	NA	NA	24	NA	NA
B032	indica	Changsha	Parent	11.6	17	120.1	16.375	20.0675	21.2
B033	indica	Changsha	Parent	11	17.3	113.7	17.6667	20.995	20.6667
B034	japonica	Changsha	Parent	12.25	33.25	162.5	15	19.8667	22.4333
B035	indica	Changsha	Parent	16.6	55.4	260.8	10	17.72	18.6667
B036	japonica	Changsha	Parent	10.5833	14.75	106.083	8	2.44	22.8
B037	japonica	Changsha	Parent	14.8	50.4	261.6	7.5	5.73	17.6556
B038	japonica	Changsha	Parent	13.6	51.5	257.4	NA	NA	NA
B039	indica	Changsha	Parent	13.2	41.4	223.925	17.5833	37.87	18.2556
B040	indica	Changsha	Parent	13.2	39.3	219.6	18.5	27.22	17.3
B043	japonica	Changsha	Parent	17	49	270.8	7.75	26.3933	20.1722
B044	indica	Changsha	Parent	12.4	23.8	141.2	9	12.85	18.7111
B045	japonica	Changsha	Parent	9.9	19.6	115.1	17.4167	26.9717	22.3444
B046	japonica	Changsha	Parent	13.1	33.3	173.1	11.6667	22.63	24.2056
B047	japonica	Changsha	Parent	11.3	32.8	168.9	11.875	23.35	20.75
B048	indica	Changsha	Parent	12.2	33.7	172.6	18.9167	31.965	17.45
B049	indica	Changsha	Parent	14.4	25.8	165.8	13	15.15	21.2222
B051	indica	Changsha	Parent	12.4	25.2	162.5	18.1667	26.0533	19.55
B052	indica	Changsha	Parent	13.2	44	245.2	13	19.05	17.7
B053	japonica	Changsha	Parent	13.5	38.9	212.6	12.75	23.01	20.1222
B054	japonica	Changsha	Parent	16.1	41.8	241.8	8.25	17.2425	18.4
B055	japonica	Changsha	Parent	13.3	30.4	166.3	11.5	22.74	20.2667
B056	japonica	Changsha	Parent	10.5	13.8	105.8	19.3333	51.32	22.2222
B057	japonica	Changsha	Parent	10.3667	24.7667	42.6667	NA	NA	NA
B058	indica	Changsha	Parent	9	17	99.8	10.75	11.8562	22.9
B059	indica	Changsha	Parent	13.9	36.2	195.5	15	26.845	20.2778
B060	indica	Changsha	Parent	10.8	18.6	123.8	22.25	26.8	18.8444
B061	indica	Changsha	Parent	NA	NA	NA	NA	NA	NA
B062	indica	Changsha	Parent	14.1	32.5	192.6	14.625	38.6037	23.3722
B063	indica	Changsha	Parent	14.3	38.5	222.3	16.5	48.5983	21.9444
B064	indica	Changsha	Parent	10	24.6	128.4	14	13.3912	18.7833
B065	indica	Changsha	Parent	13.8	45.2	273.3	12.5	29.235	16.2778
B066	japonica	Changsha	Parent	16.125	40.375	218.5	10	24.9133	22.8889
B067	indica	Changsha	Parent	11.5	20.2	130.9	16.125	29.7362	19.3944
B068	japonica	Changsha	Parent	11.3	19.4	129.4	19.6667	27.0783	24.7944
B069	japonica	Changsha	Parent	10.5	29.9	159.5	9.5	21.54	24.9889
B070	japonica	Changsha	Parent	11	34.6	192.6	NA	NA	NA
B071	japonica	Changsha	Parent	14.5	50.75	255.75	17.3333	17.69	18.2333
B072	indica	Changsha	Parent	NA	NA	NA	NA	NA	NA
B073	indica	Changsha	Parent	11	22.5	135.5	7	11.13	19.75
B074	indica	Changsha	Parent	12.2	37.7	190.1	11.75	22.5075	20.0389
B075	indica	Changsha	Parent	15	25.75	165.5	19.5	35.71	22.5444
B076	indica	Changsha	Parent	NA	NA	NA	NA	NA	NA
B077	japonica	Changsha	Parent	16.4	39.4	234.6	14.6667	52.42	20.9889
B079	indica	Changsha	Parent	14.1	38	205.9	12	33.79	18.8111
B081	indica	Changsha	Parent	12.6	26.5	160.9	20.3333	31.3513	21.0111
B082	indica	Changsha	Parent	15.1	33.9	197.4	NA	NA	NA
B083	indica	Changsha	Parent	13.6	27.4	159	20.3333	20.7967	17.4111
B084	japonica	Changsha	Parent	15.8	38.8	230.3	6.66667	17.5233	20.7444
B085	indica	Changsha	Parent	13.4	42.5	218.6	8.33333	17.3	22.6222
B086	japonica	Changsha	Parent	15.8	38.2	269.9	9.66667	25.7333	20.7778
B087	indica	Changsha	Parent	18.15	66.15	336.55	13.6667	60.5	20.3556
B088	indica	Changsha	Parent	NA	NA	NA	NA	NA	NA
B089	indica	Changsha	Parent	16.7	37.1	216.1	12.5	46.6083	22.2944
B090	indica	Changsha	Parent	15.2	50.5	264.7	11	26.3967	21.6111
B091	indica	Changsha	Parent	12.8	23.4	159.9	11.5	21.47	19.0889
B092	indica	Changsha	Parent	13	27	169.1	15.1667	35.955	20.9222
B093	indica	Changsha	Parent	14.1	39.9667	206.533	13.8333	32.3667	21.3667
B094	indica	Changsha	Parent	14.3	41.5	232.1	17.5	51.99	21.2556
B095	indica	Changsha	Parent	12.6667	29.6667	208	18	36.025	22.5667
B096	indica	Changsha	Parent	16.525	40.425	242.45	10	31.2925	26.5278
B097	indica	Changsha	Parent	12.4	27.9	163.7	18.75	31.9017	20.5556
B100	japonica	Changsha	Parent	14	31.75	123.083	7.66667	5.575	13.2917
B101	japonica	Changsha	Parent	11.6	22.7	141.5	12.1667	11.1967	20.3111
B102	japonica	Changsha	Parent	12.1	27.2	134.8	18.5	26.4513	21.3406
B103	japonica	Changsha	Parent	14.9	70.9	359.3	6.66667	37.5883	20.7222
B104	indica	Changsha	Parent	15	34.6	212.3	NA	NA	NA
B105	indica	Changsha	Parent	13.8	22	144.4	22	NA	NA
B106	indica	Changsha	Parent	13.7	16.55	122.4	13.75	NA	NA
B107	indica	Changsha	Parent	14.625	43.375	188.75	14.6667	NA	NA
B108	indica	Changsha	Parent	NA	NA	NA	NA	NA	NA
B109	japonica	Changsha	Parent	13.2	35.8	201.3	11.5	17.79	19.3222
B110	japonica	Changsha	Parent	17.85	45.1	252.675	11.8333	40.58	24.5556
B111	japonica	Changsha	Parent	15.5667	34.4	192.3	8.83333	17.3517	23.0222
B112	indica	Changsha	Parent	14.6	45.6	235.8	19.375	33.3287	21.0389
B113	indica	Changsha	Parent	13.2	30	176.2	NA	NA	NA
B114	indica	Changsha	Parent	14	30.7	185.5	7	8.27333	17.9
B115	indica	Changsha	Parent	13.1	26.2	170.7	16.3333	25.82	21.3111
B116	indica	Changsha	Parent	10	12.675	101.2	13.5	14.0125	25.9778
B117	japonica	Changsha	Parent	12.2	34.8	194.5	16.5	30.4317	24.4111
B118	indica	Changsha	Parent	15.8333	15.6667	149.133	NA	NA	NA
B119	indica	Changsha	Parent	10.7	22.3	129.4	22	57.4787	22.5778
B120	indica	Changsha	Parent	14.1	28.5	175.9	15	37.3525	21.0611
B121	indica	Changsha	Parent	14.6	29.6	191	13.3333	22.9617	22.4111
B122	japonica	Changsha	Parent	12.7	30.8	168.4	12.625	25.8883	21.8944
B123	indica	Changsha	Parent	10.4	23	138.3	14.25	27.3863	19.5944
B124	japonica	Changsha	Parent	13.3	32.6	167.5	15	35.4767	21.9722
B125	indica	Changsha	Parent	10.7	22.9	123.5	14.1667	28.4367	19.2417
B126	indica	Changsha	Parent	10.7	31.8	162.1	11.5	22.46	20.7056
B127	indica	Changsha	Parent	13	42.3	222.7	11.5	22.9967	21.4111
B128	indica	Changsha	Parent	NA	NA	NA	NA	NA	NA
B129	indica	Changsha	Parent	13.875	35.2917	202.708	NA	NA	NA
B130	indica	Changsha	Parent	12.7	25.8	154.4	18.75	33.63	23.0222
B131	indica	Changsha	Parent	12.4333	17.0333	116.933	24.5	25.475	18.4333
B132	indica	Changsha	Parent	12	13.3333	106.333	12	7.82	15.9333
B133	indica	Changsha	Parent	13.8	29.3	168.4	18	26.83	23.6889
B134	japonica	Changsha	Parent	12.875	15.375	121.35	NA	NA	NA
B135	indica	Changsha	Parent	12.5	18.125	123.25	NA	NA	NA
B136	japonica	Changsha	Parent	17.75	49.6	252.5	10	36.58	22.5333
B137	indica	Changsha	Parent	10.4	28.5	151.6	NA	NA	NA
B138	indica	Changsha	Parent	12.5	33.9	192.9	20	25.375	19.0556
B139	indica	Changsha	Parent	15.5	60.4667	305.2	11.1667	29.9383	21.2111
B140	indica	Changsha	Parent	8.2	18.6	119.4	14.3333	28.03	22.9889
B141	indica	Changsha	Parent	12.7	38.7	223	11.75	19.4375	19.0778
B142	japonica	Changsha	Parent	13.3	50.1	258.9	12.5	35.5433	22.0167
B143	japonica	Changsha	Parent	13.2	40.4	203	12.1667	27.8817	24.5722
B144	japonica	Changsha	Parent	14.4	42.5	213	14.5	36.725	23.2
B145	indica	Changsha	Parent	NA	NA	NA	NA	NA	NA
B146	indica	Changsha	Parent	14.2	46.7	238.5	NA	NA	NA
B147	indica	Changsha	Parent	10.6	18.4	113	30.75	45.43	21.2111
B148	japonica	Changsha	Parent	16.3333	16.6667	139.667	13.6667	NA	NA
B149	indica	Changsha	Parent	12.1	23.1	145.2	24.625	55.2088	21.3833
B150	indica	Changsha	Parent	10.1	19.3	114.4	13.875	19.8925	20.8222
B151	indica	Changsha	Parent	12.7	29.4	178.9	19.75	27.9838	18.6056
B152	japonica	Changsha	Parent	10.5	28.5	150.9	15	26.4867	19.2611
B153	indica	Changsha	Parent	11.2	34.6	178	15.5	27.5975	20.0944
B154	japonica	Changsha	Parent	11.4	23.6	143.5	16.5	30.0317	19.2389
B155	indica	Changsha	Parent	12.2	25.8	148.4	15.3333	29.815	23.7333
B156	indica	Changsha	Parent	12.5	15.3	129.3	18.2083	31.1337	26.3667
B157	indica	Changsha	Parent	11.3	36.8	189.3	12.25	20.53	22.8944
B158	indica	Changsha	Parent	14	22.2	150.4	13.6667	6.98333	13.2667
B159	indica	Changsha	Parent	NA	NA	NA	NA	NA	NA
B160	japonica	Changsha	Parent	NA	NA	NA	NA	NA	NA
B161	japonica	Changsha	Parent	13.2	34.4	200.8	17.75	39.1675	21.5333
B162	japonica	Changsha	Parent	15.4	37.2	214.4	10.6667	25.9267	19.6333
B163	indica	Changsha	Parent	10.9	21.5	129.7	21.5	40.8762	22.4778
B164	indica	Changsha	Parent	13.2	23	154.4	12.8333	44.075	18.95
B165	indica	Changsha	Parent	17	53.6	262.4	NA	NA	NA
B166	japonica	Changsha	Parent	12.5	23.025	150.1	9.75	18.4363	21.1944
B167	japonica	Changsha	Parent	NA	NA	NA	NA	NA	NA
B168	japonica	Changsha	Parent	12.8	33.3	178.5	13.5	23.785	19.3
B169	japonica	Changsha	Parent	10.4	18.5	114.4	20.25	28.95	20.8667
B170	japonica	Changsha	Parent	12	29	164.8	21.1667	29.36	21.35
B171	japonica	Changsha	Parent	10	22.2	125	NA	NA	NA
B173	indica	Changsha	Parent	13.375	32.575	194.175	10.6667	22.0433	23.7556
B176	indica	Changsha	Parent	13.6	40.1	220.2	10	29.5767	20.7778
B179	japonica	Changsha	Parent	NA	NA	NA	NA	NA	NA
B180	indica	Changsha	Parent	15.5	49.8	251.7	11.3333	23.58	19.3222
B181	indica	Changsha	Parent	12.5	16.9	128	15.3333	28.02	16.4778
B182	japonica	Changsha	Parent	12.9	23.3	143.8	22.5	43.495	24.2111
B183	japonica	Changsha	Parent	12.9	30.9	163.9	12.6667	20.8133	19.3833
B184	indica	Changsha	Parent	8.5	11.75	84	14.6667	19.55	15.5833
B185	indica	Changsha	Parent	15.6667	24	151.667	NA	NA	NA
B187	indica	Changsha	Parent	14	35.2	208.4	15	37.33	17.2444
B188	japonica	Changsha	Parent	14.95	23.25	166.275	6	15.0683	23.1278
B189	japonica	Changsha	Parent	13.2	30.6	183.2	6.33333	19.21	27.8333
B190	japonica	Changsha	Parent	14.6	41.8	223.3	9.5	33.82	24.2222
B191	japonica	Changsha	Parent	14.7667	46.6667	274.3	9.5	14.55	17.5667
B192	indica	Changsha	Parent	17	51	266.5	19	47.98	23.3111
B193	indica	Changsha	Parent	10.05	16.05	115.4	13.6667	31.22	22.9889
B194	indica	Changsha	Parent	16.2	33.2	217.2	17	33.03	20.6333
B195	indica	Changsha	Parent	15.5	55.7	302.8	17	32.3783	15.4778
B196	japonica	Changsha	Parent	10.2	35.7	176	10.125	26.8	30.8056
B197	indica	Changsha	Parent	NA	NA	NA	NA	NA	NA
B198	indica	Changsha	Parent	11.4	32.9	179.3	14	11.745	19.5556
B199	japonica	Changsha	Parent	16	45.6	208.6	25	87.92	20.9889
B200	indica	Changsha	Parent	13.6	46.9	224.8	15.8333	22.3167	18.1167
B201	indica	Changsha	Parent	14	39.6	226.7	16	35.7467	20.0944
B202	indica	Changsha	Parent	12.8	41.2	217.6	7.66667	18.45	19.9667
B203	indica	Changsha	Parent	16.4	35.475	210.05	13.3333	33.4633	19.5722
B204	japonica	Changsha	Parent	10.6	18.1	109.2	13.75	22.4887	26.8722
B205	japonica	Changsha	Parent	NA	NA	NA	NA	NA	NA
B207	indica	Changsha	Parent	11.4	11.6	104.7	25.6667	18.7	20.4333
B208	indica	Changsha	Parent	NA	NA	NA	NA	NA	NA
B210	indica	Changsha	Parent	10.9	23.7	142.1	14.5	27.0025	22.2722
B212	japonica	Changsha	Parent	13.2	39.4	227.1	12.9167	25.0717	15
B213	indica	Changsha	Parent	NA	NA	NA	NA	NA	NA
B214	indica	Changsha	Parent	11.9	27.7	170	19.9583	26.77	20.1111
B215	japonica	Changsha	Parent	12.4	25.8	140.45	16	19.8975	21
B216	indica	Changsha	Parent	11.2	29.9	166.8	22.625	44.1962	21.5778
B217	indica	Changsha	Parent	12.3	29.3	160.4	16.6667	36.3	19.1333
B218	japonica	Changsha	Parent	11.9	42.4	221.9	12.6667	24.7017	20.7833
B219	indica	Changsha	Parent	13.2	17.8667	137.6	NA	NA	NA
B221	indica	Changsha	Parent	13.5	44.2	227.8	22.8333	43.9	21.5889
B222	indica	Changsha	Parent	15.5667	53.6	271.5	11	14.2417	25.5833
B223	japonica	Changsha	Parent	15.2	34.8	207.1	15.5	28.845	27.8
B224	indica	Changsha	Parent	16.3	41.1	246.3	17	36.7	17.5556
B225	japonica	Changsha	Parent	11.2	32.2	150.2	NA	NA	NA
B226	japonica	Changsha	Parent	NA	NA	NA	NA	NA	NA
B227	indica	Changsha	Parent	11.7667	20.4667	134.2	17.75	27.7325	18.0333
B228	japonica	Changsha	Parent	13.9	40.1	221.7	14.1667	19.1133	19.0889
B229	indica	Changsha	Parent	15.2	48.6	277.5	12.5	38.72	21.3556
B230	japonica	Changsha	Parent	18.1	52.1	265	8.83333	13.3183	17.3
B231	indica	Changsha	Parent	12.7	27.2	159.6	13.6667	14.61	20.0444
B232	indica	Changsha	Parent	12.7	22.9	136.8	17	28.9925	20.6444
B233	indica	Changsha	Parent	11.3	29.2	164.1	16.8333	46.0583	21.1
B234	indica	Changsha	Parent	16.4	48.2	284.1	12.6667	29.2317	21.6944
B235	japonica	Changsha	Parent	13.2	39.6	204.4	12.3333	34.7617	22.3833
B236	japonica	Changsha	Parent	11.7	37.2	187.6	12.2917	32.33	24.7556
B238	indica	Changsha	Parent	12.9	17.9	144.6	18.1667	33.9767	23.3722
B239	indica	Changsha	Parent	15.4	32.3	193.2	15.6667	33.925	21.0611
B240	japonica	Changsha	Parent	11.4	20	131	15.3333	25.28	21.5
B241	japonica	Changsha	Parent	13.6	47	259	12.6667	26.38	18.0556
B242	indica	Changsha	Parent	12.5	33.7	186.4	19.1667	41.695	24.0389
B243	indica	Changsha	Parent	13.8	31.6	183.6	21.75	22.83	17.0111
B244	indica	Changsha	Parent	13.7	38.8	223.2	NA	NA	NA
B245	japonica	Changsha	Parent	15.05	44.6	236.35	11	43.9833	21.5556
B246	indica	Changsha	Parent	14.7	40.2	215.1	19.6667	56.67	20.1444
B247	indica	Changsha	Parent	10.8	23.6	136	17.5	30.885	18.6778
B248	indica	Changsha	Parent	10.9	16.1	110.8	15.6667	23.6733	22.6833
B249	indica	Changsha	Parent	9.9	23	139.8	17.1667	19.7875	17.5611
B250	japonica	Changsha	Parent	10.5	22.8	138.6	19.5	27.4475	18.6611
B252	indica	Changsha	Parent	20	66.2	313	9.33333	24.9533	21.8667
B253	indica	Changsha	Parent	13.5	40.3	205.6	NA	NA	NA
B254	indica	Changsha	Parent	14.1	42.5	222.3	NA	NA	NA
B255	indica	Changsha	Parent	9.96667	20.3333	120.433	12.75	11.49	17.2661
B258	japonica	Changsha	Parent	NA	NA	NA	NA	NA	NA
B259	indica	Changsha	Parent	11.8	31.5	173.1	18.75	36.81	23.7278
B260	indica	Changsha	Parent	14.6	52.6	261.4	15.3333	53.5167	20.9333
B261	indica	Changsha	Parent	13.2	29.2	182	12	18.785	19.3167
B263	japonica	Changsha	Parent	12.8	15.8	132.8	18.25	38.525	22.9111
B264	indica	Changsha	Parent	8.5	18.3	111.3	9.25	16.02	23.2889
B265	indica	Changsha	Parent	13.375	36.925	209.1	NA	NA	NA
B266	japonica	Changsha	Parent	17.1	47.1	271.2	7.83333	12.8033	19.45
B268	indica	Changsha	Parent	18.375	50.925	280.375	11	27.86	21.3056
B269	japonica	Changsha	Parent	12.6	29.9	167.4	14.1667	30.5333	21.5389
YB10_1	japonica	Changsha	Parent	14.6	23.6	188.4	10	NA	NA
YB11_1	japonica	Changsha	Parent	13	17.25	130	NA	NA	NA
YB12_1	japonica	Changsha	Parent	11.7	23.7	149.1	6.08333	18.1438	36.6944
YB14_1	japonica	Changsha	Parent	15.2	43.3	274.6	5.33333	12.84	30.3861
YB15_1	indica	Changsha	Parent	12.1	36.8	183.4	11.5	14.57	18.0667
YB16_1	indica	Changsha	Parent	14.1	30.525	171.75	21.1667	NA	NA
YB17_1	japonica	Changsha	Parent	12.5	35.15	187.9	18.4167	16.6633	13.6056
YB18_1	indica	Changsha	Parent	13.5	17.1333	132.3	NA	NA	NA
YB19_1	japonica	Changsha	Parent	9	20.8	109.6	NA	NA	NA
YB1_1	japonica	Changsha	Parent	14.7	47.9	253.6	10	20.82	19.4667
YB20_1	japonica	Changsha	Parent	20	44.2	219	14.3333	36.77	17.2556
YB22_1	japonica	Changsha	Parent	16.6	40.2	195.6	17	25.345	NA
YB24_1	japonica	Changsha	Parent	17	43.3	257.8	7.66667	23.9	24.9333
YB2_1	japonica	Changsha	Parent	15.5	37	218.2	9.25	23.9375	20.6444
YB4_1	indica	Changsha	Parent	14.2	35.9	205.4	17.25	19.955	15.8778
YB5_1	indica	Changsha	Parent	13.4	38.8	208.8	10.3333	21.5633	22.05
YB6_1	japonica	Changsha	Parent	NA	NA	NA	NA	NA	NA
YB7_1	japonica	Changsha	Parent	6.1	10.3	63.9	12.875	14.1788	21.6333
YB8_1	japonica	Changsha	Parent	15.6	47	251	16.6667	51.2367	24.3444
YB9_1	indica	Changsha	Parent	NA	NA	NA	20.6667	NA	NA
9311	indica	Sanya	Parent	13.9161	42.2305	218.269	8.10909	33.1474	28.6413
Nipponbare	japonica	Sanya	Parent	5.51521	8.30185	55.7682	15.8436	10.9203	24.5234
B001	japonica	Sanya	Parent	NA	NA	NA	NA	NA	NA
B002	japonica	Sanya	Parent	6.2	9.7	64.4	14.625	16.67	23.32
B003	japonica	Sanya	Parent	9	21.7	114.9	8.8	13.785	24.93
B004	japonica	Sanya	Parent	6.5	11.5	73.6	13.125	15.6962	25.86
B005	japonica	Sanya	Parent	5.175	8.375	54.575	9.79167	10.1521	23.445
B006	indica	Sanya	Parent	9.2	19.6	119.1	18.3	38.055	23.53
B007	indica	Sanya	Parent	10.4	18	121	8.16667	32.6567	30.55
B008	japonica	Sanya	Parent	8.5	16.6	107.1	19.825	32.5012	20.09
B009	indica	Sanya	Parent	10	20.6	125.6	10.2	28.874	30.63
B010	indica	Sanya	Parent	11.35	25.45	156.55	11.3333	21.4367	24.38
B011	indica	Sanya	Parent	10	25.1	146	11	32.05	23.34
B012	indica	Sanya	Parent	11.4	27.3	153.5	14.9	20.491	23.6
B013	indica	Sanya	Parent	12	43.7	255.7	15.525	17.9958	22.2
B014	japonica	Sanya	Parent	9.3	24.9333	137.275	9.125	25.001	30.1037
B015	indica	Sanya	Parent	10.5	24.3	148.9	11.7	29.6143	24.96
B016	japonica	Sanya	Parent	6.8	13.2	92	10.525	16.515	28.29
B017	japonica	Sanya	Parent	7	15.2	92.4	9.8	18.857	31.38
B018	japonica	Sanya	Parent	11.3	30.5	186	8.975	15.2513	15.06
B019	indica	Sanya	Parent	10.8	22.8	147.3	7	21.3825	36.1
B020	indica	Sanya	Parent	11.675	36.3	223.5	7.6	18.163	18.65
B021	indica	Sanya	Parent	7.2	13.4	88	13.8	19.69	23.28
B023	japonica	Sanya	Parent	10.8	33.9	179.8	7.9	19.484	20.3
B024	indica	Sanya	Parent	13.4	32.8	174.3	10.6	26.818	22.69
B025	japonica	Sanya	Parent	14.3	33.4	202.45	4.3	9.333	25.31
B026	indica	Sanya	Parent	16.6667	34	214	6.25	14.8896	18.95
B027	indica	Sanya	Parent	13.5	33.9	197.2	8.5	20.391	23.03
B028	indica	Sanya	Parent	8.675	16.975	103.475	15.4	16.5	23.06
B029	indica	Sanya	Parent	6.7	12.7	84.5	14.625	19.556	20.64
B030	indica	Sanya	Parent	12.4	33.4667	193.933	11.1	24.4425	28.51
B031	indica	Sanya	Parent	12.2333	34.1333	213.4	10.25	35.9735	24.73
B032	indica	Sanya	Parent	10.1	27	160	10.7	20.5465	27.11
B033	indica	Sanya	Parent	9.9	21.3	170.75	9.2	24.736	24.08
B034	japonica	Sanya	Parent	6.7	12.8	77	11.5	19.374	32.13
B035	indica	Sanya	Parent	14.1	48.9	233.6	11	27.564	21.98
B036	japonica	Sanya	Parent	10.7	25.3	152.6	10.175	20.47	29.17
B037	japonica	Sanya	Parent	11.3	22.2	137.6	6.9	13.012	22.83
B038	japonica	Sanya	Parent	13	43	225.2	11.8	20.408	18.06
B039	indica	Sanya	Parent	11.6	36.4	203.6	12.5	29.093	21.93
B040	indica	Sanya	Parent	14.4	45	255.8	10.6	26.738	20.93
B043	japonica	Sanya	Parent	15.5	37.5	239	5	16.306	23.67
B044	indica	Sanya	Parent	11.2	22.9	137.25	10.2	24.036	28.13
B045	japonica	Sanya	Parent	7.46667	13.5667	116.6	9.6	22.196	26.17
B046	japonica	Sanya	Parent	9.7	20.9	122.6	9.475	18.307	26.76
B047	japonica	Sanya	Parent	9.6	28.2	151.2	11.3	26.002	26.16
B048	indica	Sanya	Parent	12.1	36.4	173.4	15.6	33.832	20.25
B049	indica	Sanya	Parent	13.4	35.4	198.1	9.35	27.6685	26.6
B051	indica	Sanya	Parent	11.6	21.3	138.8	12.075	25.7392	24.68
B052	indica	Sanya	Parent	11.3	35.7	216.2	10.8	27.008	22.23
B053	japonica	Sanya	Parent	12.1	29.9	180.9	8.4	20.819	20.92
B054	japonica	Sanya	Parent	12.75	40.25	247.5	4.7	17.243	20.84
B055	japonica	Sanya	Parent	14.3	42.5	244.5	12.1	34.756	21.08
B056	japonica	Sanya	Parent	5.6	8.2	54.2	21.5	21.551	26.5
B057	japonica	Sanya	Parent	6.2	13.7	76.5	15.6	18.986	21.04
B058	indica	Sanya	Parent	8.8	24.2	133.8	5.2	15.942	29.37
B059	indica	Sanya	Parent	14.9	41.9	239.7	10.35	27.4413	25.72
B060	indica	Sanya	Parent	10.3	23.1	147.7	9.9	26.435	27.12
B061	indica	Sanya	Parent	13.3	30	182.9	11.025	27.7823	26.07
B062	indica	Sanya	Parent	14.5	41.5	242.1	9.75	39.9607	26.56
B063	indica	Sanya	Parent	14.65	42.75	250.9	7.425	25.929	25.43
B064	indica	Sanya	Parent	11.5	32.1	164	9.7	28.627	23.59
B065	indica	Sanya	Parent	15.3	51.1	317.1	11.425	31.0443	18.15
B066	japonica	Sanya	Parent	12.9	40.2	224	8.75	18.7162	24.04
B067	indica	Sanya	Parent	12.3	20.5	141.6	11.1	27.553	25.78
B068	japonica	Sanya	Parent	11.6	21.7	125	8.3	17.943	29.21
B069	japonica	Sanya	Parent	9.1	22.4	119.2	6.8	15.684	27.03
B070	japonica	Sanya	Parent	9.4	20.3	114.6	7.9	17.306	27.17
B071	japonica	Sanya	Parent	8.4	15.9	97.5	10.5	17.351	26.67
B072	indica	Sanya	Parent	10.275	26.675	160.1	21.8	38.4759	21.59
B073	indica	Sanya	Parent	8.2	12.1	82.2	22.475	24.3558	22.82
B074	indica	Sanya	Parent	12.9	39.3	230.1	9.33333	32.6296	25.35
B075	indica	Sanya	Parent	7.5	11.7	75.6	20.925	26.0755	26.85
B076	indica	Sanya	Parent	NA	NA	NA	NA	NA	NA
B077	japonica	Sanya	Parent	8.9	18.2333	123.4	13	38.415	26.15
B079	indica	Sanya	Parent	14.5	41.2	208	11	31.08	21.46
B081	indica	Sanya	Parent	11.7	22.825	138.7	12.575	28.8487	25.16
B082	indica	Sanya	Parent	7.7	19.9	119.3	19.3	14.7963	20
B083	indica	Sanya	Parent	12	27.3	160.3	11.1333	23.049	20.94
B084	japonica	Sanya	Parent	14.2667	38.4667	226.367	7.6	26.619	24.83
B085	indica	Sanya	Parent	14.7	45.1	254.4	7.2	24.692	25.01
B086	japonica	Sanya	Parent	15.6333	38.6	249.6	4.6	18.929	22.82
B087	indica	Sanya	Parent	12.7	30.5	196.6	12.125	29.9988	14.55
B088	indica	Sanya	Parent	13.2	35.3	207.9	13.4	42.84	24.62
B089	indica	Sanya	Parent	9.9	28.1	165.1	9.5	25.662	26.34
B090	indica	Sanya	Parent	12.9	41.8	247.1	8.45833	32.2775	24.23
B091	indica	Sanya	Parent	11.7	32.5	198.4	9.7	21.734	24.7
B092	indica	Sanya	Parent	14.8	38	230.325	8.6	22.696	24.42
B093	indica	Sanya	Parent	12.5	29	174.8	12.2	30.546	26.22
B094	indica	Sanya	Parent	12.9	31.1	183.3	7.8	21.822	23.74
B095	indica	Sanya	Parent	11.3	31.7	162.1	9	27.816	23.07
B096	indica	Sanya	Parent	16.9	47.5	296.7	7	31.9425	27.14
B097	indica	Sanya	Parent	11	25.4	149.4	12.4	32.227	23.24
B100	japonica	Sanya	Parent	9.1	24.8	152.1	12.1	26.448	20.66
B101	japonica	Sanya	Parent	10.8	15.4	98.8	15.6	27.819	23.23
B102	japonica	Sanya	Parent	12	26.375	141.6	8.225	13.165	NA
B103	japonica	Sanya	Parent	10.1	28.8	186	5.45	16.4277	25.18
B104	indica	Sanya	Parent	15.6	36.9	228.1	13.7	39.571	23.58
B105	indica	Sanya	Parent	7.4	11.2	93.4	11.75	11.634	20.39
B106	indica	Sanya	Parent	11.7	18	127	12.2	28.303	27.05
B107	indica	Sanya	Parent	13.8	33.3	216.9	19.3	25.134	28.32
B108	indica	Sanya	Parent	14	43	261.1	12.5	5.72	NA
B109	japonica	Sanya	Parent	5.5	8.375	55.35	14.725	9.33075	33.4156
B110	japonica	Sanya	Parent	12.5	38.1	223.9	10.4	27.383	26.98
B111	japonica	Sanya	Parent	14.1	51.4	298.5	5.225	24.201	23.11
B112	indica	Sanya	Parent	15.3	40.3	244	10.85	36.385	23.36
B113	indica	Sanya	Parent	11.8	28.2	167.7	14.06	27.817	23.55
B114	indica	Sanya	Parent	15.05	48.075	285.325	10.3	38.162	23.69
B115	indica	Sanya	Parent	14.7	45.5	264.3	10.5	30.401	23.13
B116	indica	Sanya	Parent	11.85	28.1	175.9	31.75	17.0775	31.24
B117	japonica	Sanya	Parent	13.6	35.6	194.3	9.65	16.8407	22.66
B118	indica	Sanya	Parent	10.2	19.6	126.2	15.4	27.936	23.45
B119	indica	Sanya	Parent	12.3	25.3	165.9	11.4	29.139	23.46
B120	indica	Sanya	Parent	12.1	23.2	171.8	11.7	28.098	22.76
B121	indica	Sanya	Parent	15	38.5	239.8	9.2	37.1583	27.21
B122	japonica	Sanya	Parent	12.3	34.8333	196.233	12.95	42.281	25.03
B123	indica	Sanya	Parent	11.2	32.2	189.1	11	29.355	23.45
B124	japonica	Sanya	Parent	7.9	19.7	121.3	10.4	19.934	NA
B125	indica	Sanya	Parent	10.5	24.7	136	13.5	33.717	24.5
B126	indica	Sanya	Parent	10.9	31.7	170.6	8.4	24.157	25.62
B127	indica	Sanya	Parent	11.1	29.3	160.5	11.3667	33.3098	26.65
B128	indica	Sanya	Parent	NA	NA	NA	NA	NA	NA
B129	indica	Sanya	Parent	10.2	21.3	132.5	10.975	25.928	21.85
B130	indica	Sanya	Parent	12.6	21.2	132.7	15.1	34.901	26.13
B131	indica	Sanya	Parent	7.3	10.6	73.8	34.7	21.014	22.34
B132	indica	Sanya	Parent	8.5	14.5	92	18	20.64	22.2207
B133	indica	Sanya	Parent	5.5	8.5	47.475	19.3667	16.0393	25.59
B134	japonica	Sanya	Parent	8.33333	13.5333	86.5667	4.225	7.47075	25.85
B135	indica	Sanya	Parent	9.275	20.75	125.8	16.3	38.762	27.24
B136	japonica	Sanya	Parent	14.1	52.8	282.3	6.75	29.524	27.36
B137	indica	Sanya	Parent	9	20.9	110.6	12.35	24.02	26.022
B138	indica	Sanya	Parent	14.2667	43.8	239.4	11.2	30.702	24.86
B139	indica	Sanya	Parent	16.8333	73.25	399.133	7.65	28.568	24.29
B140	indica	Sanya	Parent	9.2	21.6	132.6	10.8	26.782	27.01
B141	indica	Sanya	Parent	14	46.25	279.125	7.6	21.072	NA
B142	japonica	Sanya	Parent	13	50.7667	229.333	4.5	8.82667	17.6875
B143	japonica	Sanya	Parent	8.2	14.1	93.7	9.275	13.825	27
B144	japonica	Sanya	Parent	15.6	56.5	290.1	5.6	22.73	22.99
B145	indica	Sanya	Parent	NA	NA	NA	NA	NA	NA
B146	indica	Sanya	Parent	14	37.6667	204	7.75	12.826	NA
B147	indica	Sanya	Parent	12.6	31.2	198.8	19.6	32.756	23.856
B148	japonica	Sanya	Parent	12.7	38.4	213.8	6.175	20.4718	27.17
B149	indica	Sanya	Parent	13.2	28.6	182.6	9.2	28.574	26.18
B150	indica	Sanya	Parent	10.6	21.4	134.6	17.7	28.16	24.86
B151	indica	Sanya	Parent	11.2	34.7	191.8	13.6	36.187	20.4
B152	japonica	Sanya	Parent	6	10.9	67.8	9.125	7.95125	23.37
B153	indica	Sanya	Parent	12.4	32.825	190	12.8	22.7547	19.87
B154	japonica	Sanya	Parent	10	26.6	149.6	9.1	18.521	23.22
B155	indica	Sanya	Parent	12	23	150	13.3333	31.4887	30.08
B156	indica	Sanya	Parent	11.8	21.7	140.8	26.125	19.9763	31.84
B157	indica	Sanya	Parent	13	40.3	207.2	9.4	29.22	28.53
B158	indica	Sanya	Parent	14.7	25.3	167.1	10.1	18.653	18.64
B159	indica	Sanya	Parent	NA	NA	NA	NA	NA	NA
B160	japonica	Sanya	Parent	NA	NA	NA	NA	NA	NA
B161	japonica	Sanya	Parent	7.6	12.8	87.9	11.475	18.9127	23.89
B162	japonica	Sanya	Parent	6.1	11.2	63.1	15.05	5.5425	32.5
B163	indica	Sanya	Parent	11.6	23.4	146.9	19.4	23.148	25.66
B164	indica	Sanya	Parent	11.9	36	209	8.375	24.1875	22.75
B165	indica	Sanya	Parent	9.7	20.9	125.2	8.075	20.4975	31.87
B166	japonica	Sanya	Parent	9.3	25.1	172.9	7.2	16.439	24.68
B167	japonica	Sanya	Parent	NA	NA	NA	NA	NA	NA
B168	japonica	Sanya	Parent	7.6	18.2	104.4	8.6	14.277	25.4
B169	japonica	Sanya	Parent	9.3	17.4	111.9	16.9	32.409	22.48
B170	japonica	Sanya	Parent	8.58333	16.75	98.0833	18.8333	30.1567	26.63
B171	japonica	Sanya	Parent	10	16.8	111.2	10.6	21.058	27.99
B173	indica	Sanya	Parent	8.55	20.55	129.1	13.2917	21.175	31.49
B176	indica	Sanya	Parent	12.7	36.4	197.4	11.1	23.741	20.6
B179	japonica	Sanya	Parent	NA	NA	NA	NA	NA	NA
B180	indica	Sanya	Parent	13.4	38.4	214.2	11.4	33.662	23.1
B181	indica	Sanya	Parent	11.4	14.4	109.725	11.125	11.8325	14.6853
B182	japonica	Sanya	Parent	7.55	14.1	109.7	16.8467	21.3117	28.36
B183	japonica	Sanya	Parent	14.3	33.175	181.1	10.3	29.7605	21.98
B184	indica	Sanya	Parent	10.4	18.6	121.4	12.2083	18.3129	18.97
B185	indica	Sanya	Parent	13.525	37.65	214.175	11.3333	26.3577	23.74
B187	indica	Sanya	Parent	12.1	32.3	188.5	14.575	40.9675	22.08
B188	japonica	Sanya	Parent	13.2	21.9	168.7	5.13333	15.0143	27.52
B189	japonica	Sanya	Parent	13.7	29.4	185.267	9.625	26.2625	23.93
B190	japonica	Sanya	Parent	12.9	29.9	185.65	6.25	13	26.62
B191	japonica	Sanya	Parent	8.8	19.4	110.1	10.7	18.117	28.62
B192	indica	Sanya	Parent	13	40.65	224.9	8.25	16.1238	24.17
B193	indica	Sanya	Parent	12.9333	37.3333	197.167	17.75	30.658	19.9
B194	indica	Sanya	Parent	15.8	46.2	255.6	11.2	45.322	25.34
B195	indica	Sanya	Parent	15.2	52.8	340.3	14.4	40.3227	17.71
B196	japonica	Sanya	Parent	8.75	7.66667	132.2	10.4	25.26	30.64
B197	indica	Sanya	Parent	12.6	33.7	204.4	10.3	24.6	20.77
B198	indica	Sanya	Parent	11.7	30.5667	142.8	18.2	43.642	27.39
B199	japonica	Sanya	Parent	6.4	10.8	72	8.6	8.112	29.33
B200	indica	Sanya	Parent	12.85	37.8	201.2	6.8	14.9375	21.96
B201	indica	Sanya	Parent	13.9	40	211.4	10.125	29.0225	24.42
B202	indica	Sanya	Parent	11	31.1	168.1	10.8333	26.2647	28.36
B203	indica	Sanya	Parent	9.675	21.5	128.5	13.75	29.5625	25.09
B204	japonica	Sanya	Parent	10.4	24	129.4	11.2	24.857	30.8
B205	japonica	Sanya	Parent	11.8	28.2	157.8	10.3	23.767	22.57
B207	indica	Sanya	Parent	7	12	75.5	22.7	20.162	27.51
B208	indica	Sanya	Parent	13.2	36	202.4	9.2	38.836	25.6
B210	indica	Sanya	Parent	6.6	14.4	92.2	17.6	22.852	22.85
B212	japonica	Sanya	Parent	12.2	37.3	200.7	7.1	16.894	23.3
B213	indica	Sanya	Parent	9.2	19.1	111.9	10.875	26.3053	28.27
B214	indica	Sanya	Parent	10.9	26.2	162.1	9.975	30.228	26.03
B215	japonica	Sanya	Parent	10.3	18.85	117.6	13.7667	23.2017	23.71
B216	indica	Sanya	Parent	7.9	17.45	95.8	9.025	15.209	23.27
B217	indica	Sanya	Parent	12.8	32.3	192.4	11	30.348	23.94
B218	japonica	Sanya	Parent	11.2	34.1	184.8	9.2	28.781	24.94
B219	indica	Sanya	Parent	10.4	19.9	127.2	8.6	19.762	33.94
B221	indica	Sanya	Parent	12.5	30.5	191.6	12.1	29.087	22.77
B222	indica	Sanya	Parent	16.4	56.8	298.6	7.375	38.537	33.97
B223	japonica	Sanya	Parent	12.8	35.1	196	7.9	25.54	28.14
B224	indica	Sanya	Parent	15.4	37.9	255.7	11	36.0007	23.28
B225	japonica	Sanya	Parent	11.4	26.5	178.35	12.2	27.5697	24.98
B226	japonica	Sanya	Parent	NA	NA	NA	NA	NA	NA
B227	indica	Sanya	Parent	13.2	22.4	148.4	14.375	24.01	22.73
B228	japonica	Sanya	Parent	6.7	8.6	62.6	11.3	13.9808	28.52
B229	indica	Sanya	Parent	14.6333	39.7667	247.9	9	23.364	23.73
B230	japonica	Sanya	Parent	12.4	39.4	210.4	4.25	9.8175	23.01
B231	indica	Sanya	Parent	7.9	11.5	74	15.6	14.22	23.18
B232	indica	Sanya	Parent	13	26.2	171.8	10.1	25.989	29.63
B233	indica	Sanya	Parent	10.3	22.5	139.5	9.9	26.192	26.54
B234	indica	Sanya	Parent	15.25	48.325	283.2	9.075	35.2985	23.54
B235	japonica	Sanya	Parent	7.5	18	110.3	7.1	13.916	28.06
B236	japonica	Sanya	Parent	8.9	21.4	123	8.9	20.333	31.76
B238	indica	Sanya	Parent	10.8	22.4	146.2	12.1	29.303	26.91
B239	indica	Sanya	Parent	12.9	34.1	201.4	13.2	36.2415	25.19
B240	japonica	Sanya	Parent	5.425	9.075	53.875	7.8	9.165	25.2055
B241	japonica	Sanya	Parent	6.875	11.725	81.9	6.3	11.08	27.05
B242	indica	Sanya	Parent	13.2	32.2	187.3	11.375	39.9925	29.95
B243	indica	Sanya	Parent	10.3	21.5	121.1	11.225	24.372	23.79
B244	indica	Sanya	Parent	13.7	41.9	257.6	9.1	32.328	21.56
B245	japonica	Sanya	Parent	13.8	32.8	141.967	5.36667	17.14	25.66
B246	indica	Sanya	Parent	12.9	42.3	203.1	7.65	27.719	23.31
B247	indica	Sanya	Parent	11.6	30.7	174	9.9	23.309	23.54
B248	indica	Sanya	Parent	10.8	19.7	129.5	11	25.467	31.62
B249	indica	Sanya	Parent	9.7	23.6	132.6	8.3	19.5961	24.84
B250	japonica	Sanya	Parent	10.2	28.6	157.2	11.3	27.009	23
B252	indica	Sanya	Parent	21.1	74.3	381.8	8.54167	33.4487	21.05
B253	indica	Sanya	Parent	10.7	24.5	134	9.16667	15.506	30.55
B254	indica	Sanya	Parent	11.7	31.9	175.6	5.575	18.2903	29.25
B255	indica	Sanya	Parent	11.6	29.8	173.6	10.9	30.804	26.66
B258	japonica	Sanya	Parent	NA	NA	NA	NA	NA	NA
B259	indica	Sanya	Parent	10.9	21.5	119.4	15.1	32.877	27.04
B260	indica	Sanya	Parent	11	22.1	142.3	8.3	20.261	25.19
B261	indica	Sanya	Parent	12	28.2	172.2	12.4	30.238	24.42
B263	japonica	Sanya	Parent	11	22.7	134.4	24.7	20.954	23.82
B264	indica	Sanya	Parent	9	17.8	119	13.525	34.4535	27.71
B265	indica	Sanya	Parent	7.8	17	107.4	19	14.53	25.93
B266	japonica	Sanya	Parent	10.2667	24.6667	161.4	5.16667	10.7463	25.81
B268	indica	Sanya	Parent	15.2	46.9	251	11.6	49.103	27.06
B269	japonica	Sanya	Parent	8.3	17	101.8	10	17.2144	21.49
YB10_1	japonica	Sanya	Parent	11.2	23.4	157.6	6.6	16.2055	31.63
YB11_1	japonica	Sanya	Parent	8.1	13.7	94.5	4.16667	8.34167	33.08
YB12_1	japonica	Sanya	Parent	11	13.05	105.65	7	10.5017	39.3852
YB14_1	japonica	Sanya	Parent	13.1	29.8333	217.067	4	11.5505	20.07
YB15_1	indica	Sanya	Parent	12.2	29	161.9	9.9	30.275	25.54
YB16_1	indica	Sanya	Parent	8.2	19.9	107.9	12.6	17.07	17.53
YB17_1	japonica	Sanya	Parent	12.3	32.8	186.8	9.95	21.2108	16.74
YB18_1	indica	Sanya	Parent	9.7	14.4	97.7	25.5	31.2575	18.84
YB19_1	japonica	Sanya	Parent	12.5667	39.6	235.1	9.53333	22.4642	21.29
YB1_1	japonica	Sanya	Parent	13.1	39.1	240.4	8.3	20.252	19.25
YB20_1	japonica	Sanya	Parent	12.4	38.4	208	9	29.9037	24.32
YB22_1	japonica	Sanya	Parent	11.4667	20.1333	137.8	7.875	16.8038	31.56
YB24_1	japonica	Sanya	Parent	11.6	23.675	148.225	5.66667	14.4679	30.22
YB2_1	japonica	Sanya	Parent	12.2	31.2	203.2	3	7.586	22.46
YB4_1	indica	Sanya	Parent	13.775	34.175	206.625	11.175	29.1932	19.21
YB5_1	indica	Sanya	Parent	13.3	35.7	205.3	11.725	33.3453	25.33
YB6_1	japonica	Sanya	Parent	NA	NA	NA	NA	NA	NA
YB7_1	japonica	Sanya	Parent	6.36667	11.2	66.8	9.33333	9.96	NA
YB8_1	japonica	Sanya	Parent	6.1	7.6	53.2	7.075	8.41625	27.08
YB9_1	indica	Sanya	Parent	9	22.6	133.7	9.7	24.441	28.4
Nipponbare	japonica	Changsha	×Nip F1	14.1	35.4667	207.567	14.5833	31.3667	19.95
B001	japonica	Changsha	×Nip F1	NA	NA	NA	NA	NA	NA
B002	japonica	Changsha	×Nip F1	11.3	23.3	137.9	18.5	37.03	18.8778
B003	japonica	Changsha	×Nip F1	10.2	28	145.2	20	36.1675	23.5944
B004	japonica	Changsha	×Nip F1	10.2	20.1	118.3	16.5	29.84	23.5111
B005	japonica	Changsha	×Nip F1	12	26.4	142	18	16.65	18.7778
B006	indica	Changsha	×Nip F1	12.6	29.4	173.8	NA	NA	NA
B007	indica	Changsha	×Nip F1	12.9667	29.175	172.325	16.5	31.4283	25.0056
B008	japonica	Changsha	×Nip F1	13	37.1	162.8	20.5	26.39	23.7778
B009	indica	Changsha	×Nip F1	7	9	68	16.3333	33.29	26.4444
B010	indica	Changsha	×Nip F1	14.4	30	190.6	24.4	36.0667	21.6111
B011	indica	Changsha	×Nip F1	16.3	55.3	281.1	30.3333	44.485	NA
B012	indica	Changsha	×Nip F1	14	37.525	195.7	NA	NA	NA
B013	indica	Changsha	×Nip F1	15.6	45.8	244.6	15.3333	29.965	21.5
B014	japonica	Changsha	×Nip F1	11.9	35.7	189.4	18	50.5783	22.1111
B015	indica	Changsha	×Nip F1	15	45.6	250.6	28	49.0833	20.8444
B016	japonica	Changsha	×Nip F1	11.6	31.1	160.5	20.7083	37.3067	21.8056
B017	japonica	Changsha	×Nip F1	10.4	34.6	176.2	22	42.4133	22.5667
B018	japonica	Changsha	×Nip F1	15.6667	55.8667	259.033	12.1667	36.74	19.4667
B019	indica	Changsha	×Nip F1	10	10.5	95.25	11	29.27	27.9222
B020	indica	Changsha	×Nip F1	15.2	62.9	343.8	19	80.55	20.7667
B021	indica	Changsha	×Nip F1	13.6	37.2	188.3	29.1667	NA	NA
B023	japonica	Changsha	×Nip F1	NA	NA	NA	NA	NA	NA
B024	indica	Changsha	×Nip F1	14.5	46.1	236.5	18.6667	36.8	22.9389
B025	japonica	Changsha	×Nip F1	16.2	51.2	282.3	12.1667	46.29	23.8444
B026	indica	Changsha	×Nip F1	16.25	34.75	202.5	NA	NA	NA
B027	indica	Changsha	×Nip F1	11.85	17.8	170.8	16.5	NA	NA
B028	indica	Changsha	×Nip F1	14	38.8	210.4	26	30.9183	22.0611
B029	indica	Changsha	×Nip F1	11.6	30.6	168.1	23	39.7167	20.6667
B030	indica	Changsha	×Nip F1	13	29	164.4	13	NA	NA
B031	indica	Changsha	×Nip F1	11.6	42.8	168.4	19.6667	NA	NA
B032	indica	Changsha	×Nip F1	14.6	38.6	209.2	NA	NA	25.1778
B033	indica	Changsha	×Nip F1	12.6	28.8	164.4	NA	NA	24.5778
B034	japonica	Changsha	×Nip F1	15.6	48	254	20	36.2567	20.1222
B035	indica	Changsha	×Nip F1	14.9	48.9	249.6	18.6667	43.4833	19.8222
B036	japonica	Changsha	×Nip F1	13.1	40.7	195.1	18	61.9967	22.15
B037	japonica	Changsha	×Nip F1	13.4	40	219	12.25	23.6325	19.0722
B038	japonica	Changsha	×Nip F1	12.7	42.4	204.8	22	18	14.7444
B039	indica	Changsha	×Nip F1	13.2	46	241.8	23.3333	47.0333	22.9444
B040	indica	Changsha	×Nip F1	15	44.3	240.7	27.6667	66.7267	20.2111
B043	japonica	Changsha	×Nip F1	10.4	22.6	123	25	43.08	20.6222
B044	indica	Changsha	×Nip F1	NA	NA	NA	NA	NA	13.8
B045	japonica	Changsha	×Nip F1	9.6	20.3	110.3	17.5	32.2013	22.5611
B046	japonica	Changsha	×Nip F1	10.7	20.3	119.6	15.6667	31.7933	22.5667
B047	japonica	Changsha	×Nip F1	11.2	24.3	141.9	16.5	19.74	20.6889
B048	indica	Changsha	×Nip F1	12.5	34.2	181.2	22.3333	38.77	18.1889
B049	indica	Changsha	×Nip F1	15.4	40.8	224.7	17.6667	38.7133	22.6444
B051	indica	Changsha	×Nip F1	14.725	23.225	168.475	13.5833	17.9433	20.4111
B052	indica	Changsha	×Nip F1	15.4	64.5	323.7	18.8333	73.28	20.6167
B053	japonica	Changsha	×Nip F1	NA	NA	NA	NA	NA	NA
B054	japonica	Changsha	×Nip F1	NA	NA	NA	NA	NA	NA
B055	japonica	Changsha	×Nip F1	13	30.7	175.4	15.6667	20.4633	20.2
B056	japonica	Changsha	×Nip F1	16.7667	57.8667	313.3	NA	NA	NA
B057	japonica	Changsha	×Nip F1	NA	NA	NA	NA	NA	NA
B058	indica	Changsha	×Nip F1	15.4	38.4	231.5	24.6667	66.17	24.5
B059	indica	Changsha	×Nip F1	15.5333	46.5667	251.767	12.3333	51.31	23.0222
B060	indica	Changsha	×Nip F1	13.8	37.4	208.4	17.6667	35.4433	22.2111
B061	indica	Changsha	×Nip F1	NA	NA	NA	NA	NA	NA
B062	indica	Changsha	×Nip F1	14.5	33.4	194.7	17.875	49.1875	23.8167
B063	indica	Changsha	×Nip F1	NA	NA	NA	NA	NA	NA
B064	indica	Changsha	×Nip F1	14.9	49.1	261.2	15	44.19	21.4333
B065	indica	Changsha	×Nip F1	15.8	56.7	286.2	18	44.9283	18.2444
B066	japonica	Changsha	×Nip F1	16.6333	50.2667	253.2	11.3333	35.43	24.0111
B067	indica	Changsha	×Nip F1	12.7	27.9	160.8	18.6667	28.3533	22.9
B068	japonica	Changsha	×Nip F1	13	25.2	147	15.1667	29.1967	26.4333
B069	japonica	Changsha	×Nip F1	10.7	30	157.8	13.3333	20.2417	18.6278
B070	japonica	Changsha	×Nip F1	10.6	37.6	191.2	22.5	10.32	19.9
B071	japonica	Changsha	×Nip F1	12.6667	41.3333	220.333	12.6667	7.65333	19.0833
B072	indica	Changsha	×Nip F1	NA	NA	NA	NA	NA	NA
B073	indica	Changsha	×Nip F1	NA	NA	NA	NA	NA	NA
B074	indica	Changsha	×Nip F1	14.5	47.4	246.1	20.1667	39.7183	22.15
B075	indica	Changsha	×Nip F1	12	31.6	168.6	23	16.135	22.2
B076	indica	Changsha	×Nip F1	NA	NA	NA	NA	NA	NA
B077	japonica	Changsha	×Nip F1	NA	NA	NA	NA	NA	NA
B079	indica	Changsha	×Nip F1	15	45.3	226.4	16.8333	29.8117	20.8611
B081	indica	Changsha	×Nip F1	13.4	37.4	199.7	16	18.49	20.2111
B082	indica	Changsha	×Nip F1	14.2	41.8	208	NA	NA	NA
B083	indica	Changsha	×Nip F1	NA	NA	NA	NA	NA	NA
B084	japonica	Changsha	×Nip F1	14.9	32.5	200.65	15	21.41	21.5111
B085	indica	Changsha	×Nip F1	15.7	45.8	243.7	21	44.2633	23.0222
B086	japonica	Changsha	×Nip F1	16.3	67.6	377.7	15	65.2117	19.4778
B087	indica	Changsha	×Nip F1	16.1667	36.6333	221.467	18.6667	14.35	18.1667
B088	indica	Changsha	×Nip F1	NA	NA	NA	NA	NA	NA
B089	indica	Changsha	×Nip F1	17.375	59.775	295.675	22.6667	NA	NA
B090	indica	Changsha	×Nip F1	14.45	42.425	222.475	16.3333	NA	NA
B091	indica	Changsha	×Nip F1	13.525	40.5	213.25	17.6667	24.51	21.4
B092	indica	Changsha	×Nip F1	14.2	33	195.9	14.6667	17.0117	24.1778
B093	indica	Changsha	×Nip F1	13.6	34.8	192.2	14.3333	26.5	24.0778
B094	indica	Changsha	×Nip F1	12.8	25.3	156.05	12.6667	22.2833	20.9778
B095	indica	Changsha	×Nip F1	13	40.4	221.6	22.3333	61.38	21.5889
B096	indica	Changsha	×Nip F1	NA	NA	NA	NA	NA	NA
B097	indica	Changsha	×Nip F1	13.6	39.7	215.2	21	37.4383	20.45
B100	japonica	Changsha	×Nip F1	14.3333	29	153	10	9.34	11.3667
B101	japonica	Changsha	×Nip F1	12.875	28	156.375	28.6667	33.1633	19.2667
B102	japonica	Changsha	×Nip F1	11.2	26.7	137.2	15	27.32	21.0778
B103	japonica	Changsha	×Nip F1	14.8	57	298.8	12.5	58.1467	22.7667
B104	indica	Changsha	×Nip F1	15.2	45.1	230.1	17.6667	19.435	21.3778
B105	indica	Changsha	×Nip F1	13.6	22.6	150	NA	NA	NA
B106	indica	Changsha	×Nip F1	13.8667	24.4667	162.467	19.125	13.3275	22.1406
B107	indica	Changsha	×Nip F1	12.95	43.85	255.5	19.6667	NA	NA
B108	indica	Changsha	×Nip F1	12.6667	27	156.333	14.5	NA	NA
B109	japonica	Changsha	×Nip F1	13.5	37.5	207.5	15.9167	33.7117	24.1
B110	japonica	Changsha	×Nip F1	15.6	44.8	231	11.3333	32.85	21.6778
B111	japonica	Changsha	×Nip F1	NA	NA	NA	NA	NA	NA
B112	indica	Changsha	×Nip F1	11.6667	20.5	140.5	8	4.92	20.9033
B113	indica	Changsha	×Nip F1	13.8	39.65	225.725	21.3333	16.94	20.41
B114	indica	Changsha	×Nip F1	13.7	39.1	210.8	16	31.81	23.6444
B115	indica	Changsha	×Nip F1	14.4	40.2	227	24.1667	54.0533	23.55
B116	indica	Changsha	×Nip F1	13.325	33.7	188.925	22	13.4683	25.175
B117	japonica	Changsha	×Nip F1	12.7083	33.375	192.5	17.8333	38.315	22.3722
B118	indica	Changsha	×Nip F1	14.3	35	199.3	NA	NA	NA
B119	indica	Changsha	×Nip F1	13.7	38.9	220.1	21.8333	30.9667	23.8722
B120	indica	Changsha	×Nip F1	14.9	40	229	23.8333	70.4467	20.8389
B121	indica	Changsha	×Nip F1	15.9	55.4	261	11	24.26	22.2333
B122	japonica	Changsha	×Nip F1	12.7	28.8	161.9	20.1667	43.3983	20.5
B123	indica	Changsha	×Nip F1	13.6667	33.8333	210.633	15.5833	24.9217	18.7889
B124	japonica	Changsha	×Nip F1	12.45	35.8	188.775	15.1667	35.5167	22.1722
B125	indica	Changsha	×Nip F1	13.6	29.9	169.6	23.1667	35.2933	20.2111
B126	indica	Changsha	×Nip F1	15.2	57.2	293.8	15.0833	61.0183	23.0556
B127	indica	Changsha	×Nip F1	14.6	41	222	17	40.3667	20.7556
B128	indica	Changsha	×Nip F1	NA	NA	NA	NA	NA	NA
B129	indica	Changsha	×Nip F1	13.2	35.6	197.8	17.6667	26.25	20.0333
B130	indica	Changsha	×Nip F1	NA	NA	NA	NA	NA	NA
B131	indica	Changsha	×Nip F1	14.2	42.9	231.7	16.1667	26.8417	23.1778
B132	indica	Changsha	×Nip F1	13.2	29.4	128	28.6667	30.8433	20.7444
B133	indica	Changsha	×Nip F1	NA	NA	NA	NA	NA	NA
B134	japonica	Changsha	×Nip F1	14.9	30.3	183.4	11	5.46	24.6167
B135	indica	Changsha	×Nip F1	12.85	24.975	157.8	NA	NA	NA
B136	japonica	Changsha	×Nip F1	14.2	28.4	173	14.6667	23.9267	21.6
B137	indica	Changsha	×Nip F1	13.8	35.8	212.6	18	29.89	21.7556
B138	indica	Changsha	×Nip F1	13.1	32.0667	186.533	19.8333	51.9133	21.8222
B139	indica	Changsha	×Nip F1	16.8	67.8	323.1	21	40.66	25.3222
B140	indica	Changsha	×Nip F1	12.6	37.7	199.7	20.8333	35.7183	24.7
B141	indica	Changsha	×Nip F1	11.9	33	179.9	10.3333	14.8983	24.4167
B142	japonica	Changsha	×Nip F1	11.4	34.8	182.8	18.3333	57.74	21.4
B143	japonica	Changsha	×Nip F1	13.0333	40.0333	212.5	15.4167	56.3275	23.7722
B144	japonica	Changsha	×Nip F1	13.5	50.3	246.9	14.6667	41.0967	21.1389
B145	indica	Changsha	×Nip F1	NA	NA	NA	NA	NA	NA
B146	indica	Changsha	×Nip F1	14.5	47.7	246.9	19.8333	56.5267	24.0111
B147	indica	Changsha	×Nip F1	15	38.2	231.4	20.3333	35.17	22.1
B148	japonica	Changsha	×Nip F1	16	58.4	292.8	19.6667	NA	NA
B149	indica	Changsha	×Nip F1	14	29.3333	201	16	25.88	20.3111
B150	indica	Changsha	×Nip F1	15.55	39.525	232.425	24.8333	40.6817	19.5167
B151	indica	Changsha	×Nip F1	14.9	34.4	210.5	19.9167	27.4067	18.5111
B152	japonica	Changsha	×Nip F1	10.3333	24.7	140.633	17.5833	32.8925	21.2333
B153	indica	Changsha	×Nip F1	16.9667	55.4	281.9	11.3333	21.5233	22.2778
B154	japonica	Changsha	×Nip F1	11.8	22.5	140.3	17.6667	27.1117	19.2444
B155	indica	Changsha	×Nip F1	14.4	26.8	173.9	18.75	24.5175	19.2222
B156	indica	Changsha	×Nip F1	14.5	33.4	190.9	17	32.54	26.2089
B157	indica	Changsha	×Nip F1	14.7	46.8	260.3	18.8333	61.3033	23.2889
B158	indica	Changsha	×Nip F1	12.3	21.5	135.5	11.6667	17.8733	16.7889
B159	indica	Changsha	×Nip F1	NA	NA	NA	NA	NA	NA
B160	japonica	Changsha	×Nip F1	NA	NA	NA	NA	NA	NA
B161	japonica	Changsha	×Nip F1	12.75	22.75	134.75	11.3333	19.83	22.3111
B162	japonica	Changsha	×Nip F1	14.6	46.4	220.6	15	33.2033	18.4444
B163	indica	Changsha	×Nip F1	12	27.8	160.2	16.5	26.4733	24.4444
B164	indica	Changsha	×Nip F1	17.7	50.8	289.175	16.6667	38.9267	21.6167
B165	indica	Changsha	×Nip F1	16.5	44.9167	246.208	NA	NA	NA
B166	japonica	Changsha	×Nip F1	13.05	31	170.3	15.875	29.9067	21.1667
B167	japonica	Changsha	×Nip F1	NA	NA	NA	NA	NA	NA
B168	japonica	Changsha	×Nip F1	13	35.975	157	13	20.32	17.7556
B169	japonica	Changsha	×Nip F1	9.9	19.8	118.8	19.25	32.29	23.6778
B170	japonica	Changsha	×Nip F1	10.5	27.2	147.4	24.6667	45.955	21.7556
B171	japonica	Changsha	×Nip F1	11.8	23.8	134.9	13.1667	24.04	20.8056
B173	indica	Changsha	×Nip F1	13	38.2	137.4	16.6667	NA	NA
B176	indica	Changsha	×Nip F1	14.7	47.575	221.975	NA	NA	21.8222
B179	japonica	Changsha	×Nip F1	NA	NA	NA	NA	NA	NA
B180	indica	Changsha	×Nip F1	14.2	36.5	196.5	19.1667	37.9667	20.8111
B181	indica	Changsha	×Nip F1	14.4	31.7	191.5	21	38.4933	20.1056
B182	japonica	Changsha	×Nip F1	9.1	16.8	100.6	18.875	27.1112	23.0667
B183	japonica	Changsha	×Nip F1	11.8	28.3	154.4	14.3333	20.395	18.4222
B184	indica	Changsha	×Nip F1	14.6	38.2	220	24.3333	37.0967	19.6333
B185	indica	Changsha	×Nip F1	14.7	37.85	207.35	7	7.74	20
B187	indica	Changsha	×Nip F1	12.45	32.575	183.925	16.5	36.9183	19.75
B188	japonica	Changsha	×Nip F1	16.4	49.3	264.8	16.3333	56.0533	23.7333
B189	japonica	Changsha	×Nip F1	16.2	49	263.2	13.5	28.37	22.2556
B190	japonica	Changsha	×Nip F1	NA	NA	NA	NA	NA	NA
B191	japonica	Changsha	×Nip F1	13.7	28.7	173.2	14.75	13.875	24.475
B192	indica	Changsha	×Nip F1	NA	NA	NA	NA	NA	NA
B193	indica	Changsha	×Nip F1	13.2	38.6	206	11	34.03	20.7111
B194	indica	Changsha	×Nip F1	15	41	223	28	46.68	21.1333
B195	indica	Changsha	×Nip F1	14.6	58.4	300.6	13.3333	35.6933	16.6
B196	japonica	Changsha	×Nip F1	9.8	31.8	159.8	14.6667	43.7033	24.8444
B197	indica	Changsha	×Nip F1	NA	NA	NA	NA	NA	NA
B198	indica	Changsha	×Nip F1	13.2	45.8	240.8	22.75	51.4125	24.8667
B199	japonica	Changsha	×Nip F1	10	NA	68.5	NA	NA	NA
B200	indica	Changsha	×Nip F1	14.3	47.7	240	18.6667	33.93	21.6
B201	indica	Changsha	×Nip F1	14.8	36.6	193.8	24.5	44.44	NA
B202	indica	Changsha	×Nip F1	13.6	31.4	171.6	12.6667	18.41	21.2778
B203	indica	Changsha	×Nip F1	17.325	43.675	230.475	NA	NA	NA
B204	japonica	Changsha	×Nip F1	11.2	20.5	122.2	16.75	35.1	25.2722
B205	japonica	Changsha	×Nip F1	12.4	24.1	152.7	NA	NA	NA
B207	indica	Changsha	×Nip F1	12.7	29.2	169	25	38.26	23.0889
B208	indica	Changsha	×Nip F1	NA	NA	NA	NA	NA	NA
B210	indica	Changsha	×Nip F1	13.4	37.3	202.9	18.25	35.565	22.4389
B212	japonica	Changsha	×Nip F1	15.1667	39.5833	218.583	16.25	22.7875	19.3444
B213	indica	Changsha	×Nip F1	NA	NA	NA	NA	NA	NA
B214	indica	Changsha	×Nip F1	13.6	40.5	206.1	17.6667	28.0017	24.0889
B215	japonica	Changsha	×Nip F1	14.65	36	197.4	NA	NA	19.6556
B216	indica	Changsha	×Nip F1	15.25	32	150.25	16.6667	NA	NA
B217	indica	Changsha	×Nip F1	13.5	31.425	194.2	18.625	28.0517	20.8944
B218	japonica	Changsha	×Nip F1	12.8	34.1	182.8	15.1667	25.0217	21.9167
B219	indica	Changsha	×Nip F1	15.1667	32	194.167	NA	NA	NA
B221	indica	Changsha	×Nip F1	10.975	33.9	203.25	9.75	14.8683	16.5433
B222	indica	Changsha	×Nip F1	15.2	58.8	298	17.5	30.15	23.4222
B223	japonica	Changsha	×Nip F1	14.3333	41.6	195.167	15.5	28.9067	25.0833
B224	indica	Changsha	×Nip F1	14.2	34	200.2	19.5	30.825	20.7222
B225	japonica	Changsha	×Nip F1	8	11	77.5	11	8.56	19.2667
B226	japonica	Changsha	×Nip F1	NA	NA	NA	NA	NA	NA
B227	indica	Changsha	×Nip F1	14.5	43.35	225.55	17.9167	27.82	21.6833
B228	japonica	Changsha	×Nip F1	14.75	37	195.5	16.6667	30.5767	20.6556
B229	indica	Changsha	×Nip F1	12.4167	24.375	156.042	11.5	7.14	18.5333
B230	japonica	Changsha	×Nip F1	16.9	55.6	277.8	14	35.57	21.3111
B231	indica	Changsha	×Nip F1	13.65	21.375	153.75	16.5	19.17	19.6167
B232	indica	Changsha	×Nip F1	13.8	34.1	199.3	18.3333	48.51	22.5722
B233	indica	Changsha	×Nip F1	12.85	28.7	168.925	22.4167	21.33	19.9611
B234	indica	Changsha	×Nip F1	14.7	32.7	191.6	14.3333	19.675	20.8944
B235	japonica	Changsha	×Nip F1	12.5	29.3	158.7	14.3333	33.0825	20.6889
B236	japonica	Changsha	×Nip F1	10	27.4	147.4	13.6667	31.5667	24.4444
B238	indica	Changsha	×Nip F1	13.7	26.3	157.1	NA	NA	NA
B239	indica	Changsha	×Nip F1	15.2	40.1	236.5	17.6667	29.96	20.1556
B240	japonica	Changsha	×Nip F1	NA	NA	NA	20.8333	53.14	21.1167
B241	japonica	Changsha	×Nip F1	15.1	48.6	258.6	13.3333	37.0388	23.8778
B242	indica	Changsha	×Nip F1	15.6	55.6	284.8	25.5	49.685	23.3444
B243	indica	Changsha	×Nip F1	13.15	26.05	145.35	16.6667	73.0733	25.1667
B244	indica	Changsha	×Nip F1	13.2	42.1	221.5	18.3333	30.1717	18.8556
B245	japonica	Changsha	×Nip F1	16.8	54	283.2	NA	NA	NA
B246	indica	Changsha	×Nip F1	14.3	40.6	213.9	17.8333	20.4533	20.8778
B247	indica	Changsha	×Nip F1	14.6	28.6	183.3	11.3333	15.15	18.1733
B248	indica	Changsha	×Nip F1	14.6	37.8	217.2	18.3333	40.35	25.4
B249	indica	Changsha	×Nip F1	14.9333	43.9667	244.2	14.8333	23.34	21.5889
B250	japonica	Changsha	×Nip F1	15.2	40.2	231.8	21.8333	31.485	19.2667
B252	indica	Changsha	×Nip F1	20.7	68.6	358.4	18.8333	46.105	17.7
B253	indica	Changsha	×Nip F1	14.8	56.2	295.8	16.6667	51.0233	21.6333
B254	indica	Changsha	×Nip F1	14.8	60.2	307.4	16	44.0567	20.9444
B255	indica	Changsha	×Nip F1	14.3	46.8	243.3	20.5	35.0717	22.0778
B258	japonica	Changsha	×Nip F1	NA	NA	NA	NA	NA	NA
B259	indica	Changsha	×Nip F1	13.4	41	205.4	13.6667	20.58	24.6833
B260	indica	Changsha	×Nip F1	13.725	32.425	194	17.5	21.87	21.1778
B261	indica	Changsha	×Nip F1	NA	NA	NA	NA	NA	NA
B263	japonica	Changsha	×Nip F1	13.2	26.8	160.8	14.75	31.23	23.0222
B264	indica	Changsha	×Nip F1	12.6	39.6	199	18.3333	44.1233	24.7222
B265	indica	Changsha	×Nip F1	12.2	44	208.2	10.6667	23.88	24.1
B266	japonica	Changsha	×Nip F1	15.0333	31.3	190.233	14.3333	21.6033	20.7889
B268	indica	Changsha	×Nip F1	14.4	24.6	162.4	NA	NA	21.0667
B269	japonica	Changsha	×Nip F1	10.4	26	141.6	18	37.4767	22.9
YB10_1	japonica	Changsha	×Nip F1	18.6	55.8	280.4	18.3333	65.5733	22.9222
YB11_1	japonica	Changsha	×Nip F1	16.7	35.3	225.6	13.5	23.595	24.0444
YB12_1	japonica	Changsha	×Nip F1	14.4667	38.6667	209.467	14.5833	20.0317	23.4917
YB14_1	japonica	Changsha	×Nip F1	15.1	59.7	284.1	NA	NA	NA
YB15_1	indica	Changsha	×Nip F1	14.8	42.7667	235.633	15.25	25.175	21.3167
YB16_1	indica	Changsha	×Nip F1	NA	NA	NA	NA	NA	NA
YB17_1	japonica	Changsha	×Nip F1	15.5	40.5	218.8	12	23.84	16.9333
YB18_1	indica	Changsha	×Nip F1	13.8333	14.5	128.667	NA	NA	NA
YB19_1	japonica	Changsha	×Nip F1	12.2	40.1	206.7	19.75	44.37	24.4889
YB1_1	japonica	Changsha	×Nip F1	13.7	40.3	215.7	14.3333	43.3183	20.15
YB20_1	japonica	Changsha	×Nip F1	16.4	55.9	276	10.5	50.36	21.7556
YB22_1	japonica	Changsha	×Nip F1	15.1	42.4	217.2	12.3333	30.2617	27.4111
YB24_1	japonica	Changsha	×Nip F1	16.6	41.1	216.8	13.3333	33.67	22.0222
YB2_1	japonica	Changsha	×Nip F1	14.5	32.9	195.9	14	20.8867	22.5333
YB4_1	indica	Changsha	×Nip F1	13.7	31.3	191.3	19.6667	26.24	17.4944
YB5_1	indica	Changsha	×Nip F1	14.975	42.5	236.35	23.5	47.13	21.2556
YB6_1	japonica	Changsha	×Nip F1	NA	NA	NA	NA	NA	NA
YB7_1	japonica	Changsha	×Nip F1	9.6	23.1	127	16.75	38.53	23.6
YB8_1	japonica	Changsha	×Nip F1	13.6	44.6	227.8	15.6667	25.6967	20.7444
YB9_1	indica	Changsha	×Nip F1	13	53.3333	241.667	18	NA	NA
9311	indica	Changsha	×9311 F1	14.1	35.4667	207.567	14.5833	31.3667	19.95
Nipponbare	japonica	Changsha	×9311 F1	NA	NA	NA	NA	NA	NA
B001	japonica	Changsha	×9311 F1	NA	NA	NA	NA	NA	NA
B002	japonica	Changsha	×9311 F1	14.25	40.75	227.5	NA	NA	NA
B003	japonica	Changsha	×9311 F1	15.3	62.2	306.7	16.25	65.125	22.1667
B004	japonica	Changsha	×9311 F1	14.5	47.85	252.975	17.3333	71.05	24.5444
B005	japonica	Changsha	×9311 F1	14.225	47.85	243.3	17	51.04	24.9667
B006	indica	Changsha	×9311 F1	NA	NA	NA	NA	NA	NA
B007	indica	Changsha	×9311 F1	NA	NA	NA	NA	NA	NA
B008	japonica	Changsha	×9311 F1	15.025	48.675	210.7	20.5	NA	NA
B009	indica	Changsha	×9311 F1	NA	NA	NA	NA	NA	NA
B010	indica	Changsha	×9311 F1	14.325	37.475	218.45	18.75	23.1837	22.2667
B011	indica	Changsha	×9311 F1	15.5	60.75	272.25	18	32.9867	NA
B012	indica	Changsha	×9311 F1	14.1	42.2	223.3	5	NA	NA
B013	indica	Changsha	×9311 F1	NA	NA	NA	NA	NA	NA
B014	japonica	Changsha	×9311 F1	NA	NA	NA	NA	NA	NA
B015	indica	Changsha	×9311 F1	14.2333	45.5	230.867	22	78.38	22.4111
B016	japonica	Changsha	×9311 F1	12.75	39.5	223.5	31	61.53	26.8556
B017	japonica	Changsha	×9311 F1	16.2	71	347.3	15.6667	51.4283	25.4722
B018	japonica	Changsha	×9311 F1	17.0667	59.1667	287.45	18.3333	NA	NA
B019	indica	Changsha	×9311 F1	15	37.2	223.8	19	85.2833	28.4444
B020	indica	Changsha	×9311 F1	18	73.2	320.4	14.3333	28.0467	17.2778
B021	indica	Changsha	×9311 F1	NA	NA	NA	NA	NA	NA
B023	japonica	Changsha	×9311 F1	15.0667	56.6667	281.533	21.8333	57.2267	24.3667
B024	indica	Changsha	×9311 F1	15.2	51.4	264.1	15.1667	59.2683	23.1444
B025	japonica	Changsha	×9311 F1	11.5	33.9	330.4	11.6667	49.0867	27.6889
B026	indica	Changsha	×9311 F1	14.5	58.1	303.9	20.75	70.1725	22.9
B027	indica	Changsha	×9311 F1	17.4	40.2	250	15	84.7117	23.4056
B028	indica	Changsha	×9311 F1	14.075	44.55	235.325	20.8333	64.7533	22.2278
B029	indica	Changsha	×9311 F1	10.8	40.8	180.6	16.6667	47.4233	22.0667
B030	indica	Changsha	×9311 F1	NA	NA	NA	NA	NA	NA
B031	indica	Changsha	×9311 F1	14.6	51	278.8	15	36.8367	21.7778
B032	indica	Changsha	×9311 F1	13.5	34.5	201.25	21.75	51.21	23.0222
B033	indica	Changsha	×9311 F1	14.1	41.2	221	16	55.3533	22.9389
B034	japonica	Changsha	×9311 F1	NA	NA	NA	NA	NA	NA
B035	indica	Changsha	×9311 F1	15.2	50.3	258.9	14	47.73	24.6556
B036	japonica	Changsha	×9311 F1	14.55	45.5	241.275	17.5	70.7425	22.6889
B037	japonica	Changsha	×9311 F1	14.6	50.3	262.9	18.75	51.875	23.9278
B038	japonica	Changsha	×9311 F1	NA	NA	NA	NA	NA	NA
B039	indica	Changsha	×9311 F1	14.2	47.9	232.7	25.8333	58.59	22.1722
B040	indica	Changsha	×9311 F1	15	50.6	251.5	17.3333	52.198	22.2667
B043	japonica	Changsha	×9311 F1	15	54.2	292.8	16.5833	61.4333	25.7389
B044	indica	Changsha	×9311 F1	15.8	51.9	290.5	16.4583	79.0533	27.7556
B045	japonica	Changsha	×9311 F1	NA	NA	NA	NA	NA	NA
B046	japonica	Changsha	×9311 F1	10.8	32.4	171	20.25	36.015	23.9667
B047	japonica	Changsha	×9311 F1	NA	NA	NA	NA	NA	NA
B048	indica	Changsha	×9311 F1	15.9	53.6	264.6	17.6667	58.14	21.7
B049	indica	Changsha	×9311 F1	14.4	54.8	269	15	61.1833	23.0778
B051	indica	Changsha	×9311 F1	NA	NA	NA	NA	NA	NA
B052	indica	Changsha	×9311 F1	13.5	60.8	307.3	16.3333	48.0183	19.95
B053	japonica	Changsha	×9311 F1	14.4	47.6	253	15.1667	35.1933	23.0611
B054	japonica	Changsha	×9311 F1	15.8	51.8667	284.067	17.8333	63.4517	25.9833
B055	japonica	Changsha	×9311 F1	13.6	45.6	242.6	12.0833	44.16	24.4611
B056	japonica	Changsha	×9311 F1	12.3	36.3	242.2	NA	NA	NA
B057	japonica	Changsha	×9311 F1	14.8	51	249.4	16.6667	56.1733	23.2111
B058	indica	Changsha	×9311 F1	NA	NA	NA	NA	NA	NA
B059	indica	Changsha	×9311 F1	15.3333	35	214.667	NA	NA	NA
B060	indica	Changsha	×9311 F1	NA	NA	NA	NA	NA	NA
B061	indica	Changsha	×9311 F1	NA	NA	NA	NA	NA	NA
B062	indica	Changsha	×9311 F1	16.2	64.2	320.2	21.3333	94.4667	24.2111
B063	indica	Changsha	×9311 F1	14.6667	45.1	254.233	13.6667	53.2217	21.65
B064	indica	Changsha	×9311 F1	NA	NA	NA	NA	NA	NA
B065	indica	Changsha	×9311 F1	15.4	52.2	293.6	13.1667	44.2217	21.7389
B066	japonica	Changsha	×9311 F1	NA	NA	NA	NA	NA	NA
B067	indica	Changsha	×9311 F1	NA	NA	NA	NA	NA	NA
B068	japonica	Changsha	×9311 F1	13.7	36.825	195.85	16.1667	25.1783	26.0278
B069	japonica	Changsha	×9311 F1	NA	NA	NA	NA	NA	NA
B070	japonica	Changsha	×9311 F1	NA	NA	NA	NA	NA	NA
B071	japonica	Changsha	×9311 F1	16	57.2	321.8	NA	NA	NA
B072	indica	Changsha	×9311 F1	14.1	35.6	185.9	25.5	44.06	21.3
B073	indica	Changsha	×9311 F1	NA	NA	NA	NA	NA	NA
B074	indica	Changsha	×9311 F1	18.3333	78.6667	397	21	111.94	23.0667
B075	indica	Changsha	×9311 F1	NA	NA	NA	NA	NA	NA
B076	indica	Changsha	×9311 F1	NA	NA	NA	NA	NA	NA
B077	japonica	Changsha	×9311 F1	15.675	43.925	245.575	14.3333	48.8833	19.0778
B079	indica	Changsha	×9311 F1	15.7	54.1	288.2	16.75	77.0817	22.2611
B081	indica	Changsha	×9311 F1	14.3	45.4	241.4	17.1667	60.0567	21.2833
B082	indica	Changsha	×9311 F1	17.5	53.6	250.5	22	NA	NA
B083	indica	Changsha	×9311 F1	14.2	24	140.2	NA	NA	NA
B084	japonica	Changsha	×9311 F1	16.5	56.25	280.5	NA	NA	NA
B085	indica	Changsha	×9311 F1	15.875	42.225	236.725	NA	NA	NA
B086	japonica	Changsha	×9311 F1	16.8	64.6	360	14	69.39	16.9667
B087	indica	Changsha	×9311 F1	NA	NA	NA	NA	NA	NA
B088	indica	Changsha	×9311 F1	NA	NA	NA	NA	NA	NA
B089	indica	Changsha	×9311 F1	NA	NA	NA	NA	NA	NA
B090	indica	Changsha	×9311 F1	NA	NA	NA	NA	NA	NA
B091	indica	Changsha	×9311 F1	14.6	59.1	310.8	14.3333	89.355	23.3889
B092	indica	Changsha	×9311 F1	14.85	39.85	229.6	11.8333	34.77	23.1778
B093	indica	Changsha	×9311 F1	14.5	34.6	194.5	14.5	36.6867	24.2556
B094	indica	Changsha	×9311 F1	NA	NA	NA	NA	NA	NA
B095	indica	Changsha	×9311 F1	NA	NA	NA	NA	NA	NA
B096	indica	Changsha	×9311 F1	15.8	49.4	268.6	13.25	69.895	26.2056
B097	indica	Changsha	×9311 F1	NA	NA	NA	NA	NA	NA
B100	japonica	Changsha	×9311 F1	16.9333	72.1333	361.767	17.6667	56.4033	21.5222
B101	japonica	Changsha	×9311 F1	15.9	46.7	248.8	18.8333	32.5	23.9444
B102	japonica	Changsha	×9311 F1	17.7	57.6	300.1	13.8333	44.1833	22.4556
B103	japonica	Changsha	×9311 F1	NA	NA	NA	NA	NA	NA
B104	indica	Changsha	×9311 F1	15.6	35.8	196.8	8	5.73	16.8667
B105	indica	Changsha	×9311 F1	15	42.75	162.8	NA	NA	NA
B106	indica	Changsha	×9311 F1	13.5	30.0667	166.733	NA	NA	NA
B107	indica	Changsha	×9311 F1	16.8333	48.6667	237.333	NA	NA	NA
B108	indica	Changsha	×9311 F1	15.6	65.8	325.4	13	68.1883	23.5722
B109	japonica	Changsha	×9311 F1	15	43.6	243.4	12.3333	43.9483	26.6278
B110	japonica	Changsha	×9311 F1	16.3	70.7	344.9	13.6667	39.305	25.0056
B111	japonica	Changsha	×9311 F1	12.6	27.7	172.25	22	31.1467	24.2333
B112	indica	Changsha	×9311 F1	NA	NA	NA	NA	NA	NA
B113	indica	Changsha	×9311 F1	14.8	67	314.4	17.6667	51.1667	21.8889
B114	indica	Changsha	×9311 F1	14	32.2	192.6	8	22.09	19.4
B115	indica	Changsha	×9311 F1	14.175	45.95	242.15	13.1667	63.2717	24.9
B116	indica	Changsha	×9311 F1	15.5	34.9	204.3	10.2083	17.8163	20.3444
B117	japonica	Changsha	×9311 F1	15.9	63.7	309	14.5	43.39	25.3889
B118	indica	Changsha	×9311 F1	14.475	30.5	185.9	NA	NA	NA
B119	indica	Changsha	×9311 F1	14.4	46.2	242.8	13	40.67	23.9
B120	indica	Changsha	×9311 F1	14.3	41.4	230.067	18	57.1867	22.4833
B121	indica	Changsha	×9311 F1	14.9	43	226	8.91667	24.9125	25.4333
B122	japonica	Changsha	×9311 F1	13.3	48.3	248.6	12.8333	32.3717	25.2833
B123	indica	Changsha	×9311 F1	15.1	46.6	257.5	9.33333	52.45	20.8
B124	japonica	Changsha	×9311 F1	15.1333	47	223.367	21.1667	40.74	24.2944
B125	indica	Changsha	×9311 F1	13.6	29.8	166.2	18	NA	NA
B126	indica	Changsha	×9311 F1	NA	NA	NA	NA	NA	NA
B127	indica	Changsha	×9311 F1	14.3	44	230.7	15.8333	47.7283	23.0833
B128	indica	Changsha	×9311 F1	NA	NA	NA	NA	NA	NA
B129	indica	Changsha	×9311 F1	15.5	51	266.5	NA	NA	NA
B130	indica	Changsha	×9311 F1	13.3	33.7	188.6	18.0833	28.4533	22.6056
B131	indica	Changsha	×9311 F1	NA	NA	NA	NA	NA	NA
B132	indica	Changsha	×9311 F1	NA	NA	NA	NA	NA	NA
B133	indica	Changsha	×9311 F1	15	35.2	200.6	15	53.28	23.3333
B134	japonica	Changsha	×9311 F1	NA	NA	NA	NA	NA	NA
B135	indica	Changsha	×9311 F1	12.9	51.3	247.5	10.6667	34.8917	25.3278
B136	japonica	Changsha	×9311 F1	18.4	71.8	359.575	NA	NA	NA
B137	indica	Changsha	×9311 F1	14.6	48	256.2	23	57.53	22.7778
B138	indica	Changsha	×9311 F1	15.4	52	278	16.3333	79.91	26.5444
B139	indica	Changsha	×9311 F1	14.2	47.3	246.5	9.25	22.2333	18.5361
B140	indica	Changsha	×9311 F1	NA	NA	NA	NA	NA	NA
B141	indica	Changsha	×9311 F1	NA	NA	NA	10.5	14.51	20.9333
B142	japonica	Changsha	×9311 F1	NA	NA	NA	NA	NA	NA
B143	japonica	Changsha	×9311 F1	14.8	47.6	241	18.1667	43.83	22.7667
B144	japonica	Changsha	×9311 F1	16.9	56.3	267.7	14.3333	55.56	26.5556
B145	indica	Changsha	×9311 F1	NA	NA	NA	NA	NA	NA
B146	indica	Changsha	×9311 F1	NA	NA	NA	18	20.56	24.1556
B147	indica	Changsha	×9311 F1	NA	NA	NA	NA	NA	NA
B148	japonica	Changsha	×9311 F1	15.4	55.0333	291.367	18.3333	NA	NA
B149	indica	Changsha	×9311 F1	NA	NA	NA	NA	NA	NA
B150	indica	Changsha	×9311 F1	NA	NA	NA	NA	NA	NA
B151	indica	Changsha	×9311 F1	16.35	36.35	216.35	12.1667	17.13	20.4333
B152	japonica	Changsha	×9311 F1	NA	NA	NA	NA	NA	NA
B153	indica	Changsha	×9311 F1	15.2	59.6	305.4	9.33333	28.1467	23.9889
B154	japonica	Changsha	×9311 F1	11.8	43.2	217.8	19.3333	41.1333	24.8556
B155	indica	Changsha	×9311 F1	NA	NA	NA	NA	NA	NA
B156	indica	Changsha	×9311 F1	15.85	50.075	264.175	18	80.495	27.6333
B157	indica	Changsha	×9311 F1	15	50.6	248.6	NA	NA	NA
B158	indica	Changsha	×9311 F1	NA	NA	NA	NA	NA	NA
B159	indica	Changsha	×9311 F1	NA	NA	NA	NA	NA	NA
B160	japonica	Changsha	×9311 F1	NA	NA	NA	NA	NA	NA
B161	japonica	Changsha	×9311 F1	NA	NA	NA	NA	NA	NA
B162	japonica	Changsha	×9311 F1	NA	NA	NA	NA	NA	NA
B163	indica	Changsha	×9311 F1	13.3333	31.5	181	18	38.9838	21.3556
B164	indica	Changsha	×9311 F1	14	50.6	266.9	20	84.4267	21.9444
B165	indica	Changsha	×9311 F1	15.3333	55.4167	268.333	16.3333	NA	NA
B166	japonica	Changsha	×9311 F1	14.6	45.8	219.6	17.25	33.89	25.5556
B167	japonica	Changsha	×9311 F1	NA	NA	NA	NA	NA	NA
B168	japonica	Changsha	×9311 F1	15	50.6667	262.333	NA	NA	NA
B169	japonica	Changsha	×9311 F1	NA	NA	NA	NA	NA	NA
B170	japonica	Changsha	×9311 F1	NA	NA	NA	NA	NA	NA
B171	japonica	Changsha	×9311 F1	NA	NA	NA	NA	NA	NA
B173	indica	Changsha	×9311 F1	17.375	61.8	261.475	NA	NA	NA
B176	indica	Changsha	×9311 F1	14.1	54.3	274.7	15.1667	45.9167	19.4222
B179	japonica	Changsha	×9311 F1	NA	NA	NA	NA	NA	NA
B180	indica	Changsha	×9311 F1	14.9	36.6	209.6	16.1667	59.5817	27.1333
B181	indica	Changsha	×9311 F1	14.8	43.3	231.5	21.5	57.2217	25.7667
B182	japonica	Changsha	×9311 F1	12.6667	38.6667	215.333	10	43.78	25.8222
B183	japonica	Changsha	×9311 F1	13	31.6	185	16.6667	37.5833	25.4667
B184	indica	Changsha	×9311 F1	15.1	55.5	285.1	17.625	48.2833	20.3111
B185	indica	Changsha	×9311 F1	14.8	36.2	219.1	7	15.48	25.2222
B187	indica	Changsha	×9311 F1	13.2	35.8	207.2	16	41.08	22.0889
B188	japonica	Changsha	×9311 F1	14.6	42.4	241.1	9.33333	33.8717	29.5444
B189	japonica	Changsha	×9311 F1	15.2	50.5	286.1	12.25	62.545	28.4389
B190	japonica	Changsha	×9311 F1	16.1	56.4	310.3	11.3333	36.8983	23.1611
B191	japonica	Changsha	×9311 F1	NA	NA	NA	NA	NA	NA
B192	indica	Changsha	×9311 F1	13	55.2	279.8	8	40.52	25.2333
B193	indica	Changsha	×9311 F1	13.2	24.4	166.8	15	40.15	26.0333
B194	indica	Changsha	×9311 F1	14.8	31.2	174	12.6667	33.0333	22.9111
B195	indica	Changsha	×9311 F1	15.4	47.1	253.8	11.6667	63.16	22.9667
B196	japonica	Changsha	×9311 F1	NA	NA	NA	NA	NA	NA
B197	indica	Changsha	×9311 F1	NA	NA	NA	NA	NA	NA
B198	indica	Changsha	×9311 F1	14.9	48.1	251.5	16.125	61.5388	23.7333
B199	japonica	Changsha	×9311 F1	NA	NA	NA	NA	NA	NA
B200	indica	Changsha	×9311 F1	14.1	50.6	255.6	15	68.44	22.3222
B201	indica	Changsha	×9311 F1	13.6	40.4	219.6	NA	NA	NA
B202	indica	Changsha	×9311 F1	11.4	40	182	13	52.39	27.0778
B203	indica	Changsha	×9311 F1	17.5	69	320.5	NA	NA	NA
B204	japonica	Changsha	×9311 F1	NA	NA	NA	NA	NA	NA
B205	japonica	Changsha	×9311 F1	14	39.2	216.7	15.8333	31.5383	27.4333
B207	indica	Changsha	×9311 F1	NA	NA	NA	NA	NA	NA
B208	indica	Changsha	×9311 F1	16.5	56.5	278.5	20	109.2	24.1333
B210	indica	Changsha	×9311 F1	NA	NA	NA	NA	NA	NA
B212	japonica	Changsha	×9311 F1	14	49.8	247.2	16.6667	48.905	24.5333
B213	indica	Changsha	×9311 F1	NA	NA	NA	NA	NA	NA
B214	indica	Changsha	×9311 F1	13.2	63.4	314.8	14.6667	63.3567	18.7333
B215	japonica	Changsha	×9311 F1	14	50.2	246.6	NA	NA	22.6667
B216	indica	Changsha	×9311 F1	16	52	239.75	23.8333	NA	NA
B217	indica	Changsha	×9311 F1	14.3	51.7	262.5	18.6667	31.31	21.8556
B218	japonica	Changsha	×9311 F1	15.1	62.7	311.9	15.8333	59.5917	24.5
B219	indica	Changsha	×9311 F1	NA	NA	NA	NA	NA	NA
B221	indica	Changsha	×9311 F1	12.5	48.5	289	20	35.45	17.4556
B222	indica	Changsha	×9311 F1	16.5	63.6	370	19	92.12	26.8333
B223	japonica	Changsha	×9311 F1	13.5	39.5	221.3	17.8333	37.805	30.3833
B224	indica	Changsha	×9311 F1	NA	NA	NA	NA	NA	NA
B225	japonica	Changsha	×9311 F1	14.75	70.5	320.75	28	NA	NA
B226	japonica	Changsha	×9311 F1	NA	NA	NA	NA	NA	NA
B227	indica	Changsha	×9311 F1	15.1	53.8	272	16.75	66.64	22.8111
B228	japonica	Changsha	×9311 F1	NA	NA	NA	NA	NA	NA
B229	indica	Changsha	×9311 F1	15.65	48	243.85	15.5	50.305	25.1333
B230	japonica	Changsha	×9311 F1	NA	NA	NA	NA	NA	NA
B231	indica	Changsha	×9311 F1	15.4	36.2	228.2	11	34.9033	22.8444
B232	indica	Changsha	×9311 F1	15.6	41	237.3	20.5	36.7733	21.8333
B233	indica	Changsha	×9311 F1	15.8	55.7	290.6	NA	NA	NA
B234	indica	Changsha	×9311 F1	16.625	50	266.667	NA	NA	NA
B235	japonica	Changsha	×9311 F1	NA	NA	NA	NA	NA	NA
B236	japonica	Changsha	×9311 F1	NA	NA	NA	NA	NA	NA
B238	indica	Changsha	×9311 F1	14.9	36.9	213.2	22.6667	NA	NA
B239	indica	Changsha	×9311 F1	13	32.1	114.3	20.1667	NA	NA
B240	japonica	Changsha	×9311 F1	14.8	47.2	262.2	NA	NA	NA
B241	japonica	Changsha	×9311 F1	15.2	56.4	301.5	14.3333	43.58	24.1167
B242	indica	Changsha	×9311 F1	NA	NA	NA	NA	NA	NA
B243	indica	Changsha	×9311 F1	15.8333	49	249.833	NA	NA	NA
B244	indica	Changsha	×9311 F1	15.3	61.5	314.1	13.0833	59.1667	21.0167
B245	japonica	Changsha	×9311 F1	15.4	59.6	312.8	20.6667	51.66	24.8111
B246	indica	Changsha	×9311 F1	14.5	47.25	226.75	NA	NA	NA
B247	indica	Changsha	×9311 F1	16.3333	46	244.667	9	22.7	16.5444
B248	indica	Changsha	×9311 F1	14	28.6667	170	NA	NA	NA
B249	indica	Changsha	×9311 F1	NA	NA	NA	NA	NA	NA
B250	japonica	Changsha	×9311 F1	NA	NA	NA	NA	NA	NA
B252	indica	Changsha	×9311 F1	16.4	55.3	283.2	15.3333	72.5967	22.9889
B253	indica	Changsha	×9311 F1	15.6	52	286.8	11.6667	54.9033	24.8333
B254	indica	Changsha	×9311 F1	17.1	61.1333	303.7	12.3333	70.1833	25.5889
B255	indica	Changsha	×9311 F1	13.075	42.35	215.6	14.3333	33.16	23.1722
B258	japonica	Changsha	×9311 F1	NA	NA	NA	NA	NA	NA
B259	indica	Changsha	×9311 F1	12.8	40.2	203.8	NA	NA	NA
B260	indica	Changsha	×9311 F1	NA	NA	NA	NA	NA	NA
B261	indica	Changsha	×9311 F1	16.7	52.4	281	21.6667	NA	NA
B263	japonica	Changsha	×9311 F1	14.7	51.45	245.7	23	57.725	25.6333
B264	indica	Changsha	×9311 F1	13.6	36.375	203.3	11.6667	62.1633	25.5333
B265	indica	Changsha	×9311 F1	13.875	38.5	150.167	17	42.095	21.6
B266	japonica	Changsha	×9311 F1	15.6	48	269.4	17	61.2	26.4444
B268	indica	Changsha	×9311 F1	16.3	64	322.7	10.5	44.81	23.95
B269	japonica	Changsha	×9311 F1	NA	NA	NA	NA	NA	NA
YB10_1	japonica	Changsha	×9311 F1	14.9	39.5	245.3	13.5	53.9233	29.6833
YB11_1	japonica	Changsha	×9311 F1	NA	NA	NA	NA	NA	NA
YB12_1	japonica	Changsha	×9311 F1	13.4	37.4	208.4	11.6667	29.2	32.6389
YB14_1	japonica	Changsha	×9311 F1	NA	NA	NA	NA	NA	NA
YB15_1	indica	Changsha	×9311 F1	14.3	45.3	236.7	16.8333	59.4933	21.5444
YB16_1	indica	Changsha	×9311 F1	13.5	42.7	224.4	19.5	66.03	23.8444
YB17_1	japonica	Changsha	×9311 F1	13.8	49.3	243.6	19.1667	42.5817	20.9889
YB18_1	indica	Changsha	×9311 F1	14.8	35.8	207.8	NA	NA	NA
YB19_1	japonica	Changsha	×9311 F1	14.3	41.025	230.325	10.3333	16.02	20.7944
YB1_1	japonica	Changsha	×9311 F1	15.1	55.5	300.5	12.5	53.5167	23.9333
YB20_1	japonica	Changsha	×9311 F1	17	66.1	313.6	13.5	28.6683	23.2
YB22_1	japonica	Changsha	×9311 F1	14.8	49.4	252	15.3333	83.7033	28.3111
YB24_1	japonica	Changsha	×9311 F1	15.4	56.3	277	14.5833	44.715	27.2975
YB2_1	japonica	Changsha	×9311 F1	15.6	58	315.1	13.8333	58.3267	22.7778
YB4_1	indica	Changsha	×9311 F1	14.9	48.1	260.6	16.6667	45.5167	22.8778
YB5_1	indica	Changsha	×9311 F1	15.625	42.8	250.475	10.6667	42.78	23.3111
YB6_1	japonica	Changsha	×9311 F1	NA	NA	NA	NA	NA	NA
YB7_1	japonica	Changsha	×9311 F1	11.2	30.2	165	27.6667	32.5833	23.7111
YB8_1	japonica	Changsha	×9311 F1	NA	NA	NA	9	7.61	12.7767
YB9_1	indica	Changsha	×9311 F1	NA	NA	NA	NA	NA	NA
9311	indica	Sanya	×Nip F1	NA	NA	NA	NA	NA	NA
Nipponbare	japonica	Sanya	×Nip F1	NA	NA	NA	NA	NA	NA
B001	japonica	Sanya	×Nip F1	NA	NA	NA	NA	NA	NA
B002	japonica	Sanya	×Nip F1	5.5	9.5	67.375	12.1667	11.19	23.2
B003	japonica	Sanya	×Nip F1	7.63333	17.9667	99.9333	16.4167	27.455	26.54
B004	japonica	Sanya	×Nip F1	5.8	9.7	64.6	12	12.5843	25.32
B005	japonica	Sanya	×Nip F1	NA	NA	NA	NA	NA	NA
B006	indica	Sanya	×Nip F1	7.16667	15.8333	91.25	18.5	12.92	22.45
B007	indica	Sanya	×Nip F1	NA	NA	NA	NA	NA	NA
B008	japonica	Sanya	×Nip F1	7.4	15.6	95.8	30.75	24.0625	22.56
B009	indica	Sanya	×Nip F1	8.75	15.5	99.75	19.6667	10.9233	28.8333
B010	indica	Sanya	×Nip F1	8.5	17.5	111.25	34	15.3925	23.9
B011	indica	Sanya	×Nip F1	7.7	14.5	94.1	38.9	10.54	25.9
B012	indica	Sanya	×Nip F1	7.76667	17.5667	107.967	50.15	15.678	22.98
B013	indica	Sanya	×Nip F1	7	15.9	105.7	24.9	18.871	23.32
B014	japonica	Sanya	×Nip F1	6.75	15.5417	89.375	16.3333	26.3008	27.63
B015	indica	Sanya	×Nip F1	NA	NA	NA	NA	NA	NA
B016	japonica	Sanya	×Nip F1	5.9	9.8	66.5	16.5	17.6955	29.08
B017	japonica	Sanya	×Nip F1	5.41667	8.25	54.5833	17.75	20.155	27.6286
B018	japonica	Sanya	×Nip F1	10	27.3	159.933	12	29.6938	23.742
B019	indica	Sanya	×Nip F1	7	22.5667	99.8	33.4167	14.465	23.9437
B020	indica	Sanya	×Nip F1	8.275	20.325	121.85	12.35	28.55	24.49
B021	indica	Sanya	×Nip F1	6.2	11.2	71.6	25.375	16.1304	22.9606
B023	japonica	Sanya	×Nip F1	NA	NA	NA	NA	NA	NA
B024	indica	Sanya	×Nip F1	7.8	16.7	98.1	30.1	10.344	21.53
B025	japonica	Sanya	×Nip F1	9.7	22.975	142.575	10.375	35.8088	30.02
B026	indica	Sanya	×Nip F1	13.125	29.75	175.5	9.25	26.1588	23.1
B027	indica	Sanya	×Nip F1	7.9	15.475	101.2	34.8	11.231	20.7778
B028	indica	Sanya	×Nip F1	7.8	13.4	91	37.8	5.16	23.6842
B029	indica	Sanya	×Nip F1	NA	NA	NA	NA	NA	NA
B030	indica	Sanya	×Nip F1	7.8	14.6	94.8	25.125	7.28075	23
B031	indica	Sanya	×Nip F1	9.3	24.2	149.6	18	9.01333	27.64
B032	indica	Sanya	×Nip F1	7.225	13.825	90.625	27.8	14.8125	23.87
B033	indica	Sanya	×Nip F1	10.8	27.4	113.6	37	6.208	23.25
B034	japonica	Sanya	×Nip F1	6.875	14.2917	81.9167	14.5	18.81	29.38
B035	indica	Sanya	×Nip F1	NA	NA	NA	NA	NA	NA
B036	japonica	Sanya	×Nip F1	7.65	16	91.7	31	31.98	NA
B037	japonica	Sanya	×Nip F1	9.5	23	133.4	14.5	24	24.76
B038	japonica	Sanya	×Nip F1	8	16.6667	95.6667	9.33333	13.7433	26.15
B039	indica	Sanya	×Nip F1	9	19.6667	116.333	58.5	22.725	19.75
B040	indica	Sanya	×Nip F1	8.7	18.8	106.2	35	10.4645	21.5
B043	japonica	Sanya	×Nip F1	9.5	21	125	11	23.4	26.8
B044	indica	Sanya	×Nip F1	5.55	10.7	65.45	14.6667	19.6033	28.22
B045	japonica	Sanya	×Nip F1	7.1	14	63.7	13.6	15.632	27.5
B046	japonica	Sanya	×Nip F1	NA	NA	NA	11.4	22.442	NA
B047	japonica	Sanya	×Nip F1	6.6	11.2	73.8	12	12.254	25.93
B048	indica	Sanya	×Nip F1	10.8333	26	136.5	47	12.66	NA
B049	indica	Sanya	×Nip F1	7.8	17.6	113	29.3333	17.54	NA
B051	indica	Sanya	×Nip F1	7.5	15.8	95.2	36.3	12.915	18.92
B052	indica	Sanya	×Nip F1	6.8	13.9	96.8	26.725	12.6205	21.9057
B053	japonica	Sanya	×Nip F1	NA	NA	NA	NA	NA	NA
B054	japonica	Sanya	×Nip F1	6.5	12.625	79.5	7.25	7.56	23.4887
B055	japonica	Sanya	×Nip F1	7.33333	17.3333	102.333	9.5	8.815	22.93
B056	japonica	Sanya	×Nip F1	9.65	24.55	139.85	17.5	12.5933	24.322
B057	japonica	Sanya	×Nip F1	5.5	6	46	16	7.03	24.5495
B058	indica	Sanya	×Nip F1	7.4	14.8	91.2	32	14.818	25.2
B059	indica	Sanya	×Nip F1	8	22.3	128.3	21.7	13.897	26.58
B060	indica	Sanya	×Nip F1	7.25	16.075	98.2	37.4667	6.956	25.52
B061	indica	Sanya	×Nip F1	NA	NA	NA	NA	NA	NA
B062	indica	Sanya	×Nip F1	8.5	18.4	112.5	24.5	10.5525	28.54
B063	indica	Sanya	×Nip F1	8.33333	20.3333	108	10.25	5.595	24.7059
B064	indica	Sanya	×Nip F1	NA	NA	NA	NA	NA	NA
B065	indica	Sanya	×Nip F1	8.1	19.6	121.1	35.6	18.28	NA
B066	japonica	Sanya	×Nip F1	9.45833	22.2917	128.292	11.1667	27.0933	29.48
B067	indica	Sanya	×Nip F1	9.29167	18.2083	115.567	23.625	12.0612	26.4324
B068	japonica	Sanya	×Nip F1	7.5	11.7	75.8	16.8	28.843	30.86
B069	japonica	Sanya	×Nip F1	8.2	17.6	100.4	13.3	22.25	27.41
B070	japonica	Sanya	×Nip F1	7.925	15.225	90.4	13.3	19.856	28.59
B071	japonica	Sanya	×Nip F1	5.9	10.2	65	25.3	6.386	25.5333
B072	indica	Sanya	×Nip F1	NA	NA	NA	NA	NA	NA
B073	indica	Sanya	×Nip F1	5.5	9.5	63	NA	NA	NA
B074	indica	Sanya	×Nip F1	7.575	12.925	77.4	27.1	16.1367	23.4184
B075	indica	Sanya	×Nip F1	6.45	9.2	62.025	48.1333	11.4747	23.8
B076	indica	Sanya	×Nip F1	NA	NA	NA	NA	NA	NA
B077	japonica	Sanya	×Nip F1	10.4	22	140.3	28.5	18.134	23.14
B079	indica	Sanya	×Nip F1	8.8	16.5	105.9	23.1	8.623	25.1613
B081	indica	Sanya	×Nip F1	8.125	17.375	108.75	20	12.884	27.8
B082	indica	Sanya	×Nip F1	6	12	82.5	56	12.82	NA
B083	indica	Sanya	×Nip F1	NA	NA	NA	NA	NA	NA
B084	japonica	Sanya	×Nip F1	9.3	23.6	142.2	14.5	19.854	25.73
B085	indica	Sanya	×Nip F1	8.1	16.1	102.6	26.575	9.52425	28.3803
B086	japonica	Sanya	×Nip F1	10.65	28.9	172.075	10.2	17.0607	25.54
B087	indica	Sanya	×Nip F1	10.875	29.25	175.475	25.5833	11.9113	25
B088	indica	Sanya	×Nip F1	8.6	17.6	107.5	26.5	21.0347	28.6
B089	indica	Sanya	×Nip F1	6.8	14.55	84.7	34.6	11.7553	24.78
B090	indica	Sanya	×Nip F1	8.675	19.35	118.525	33.1667	12.3242	23.75
B091	indica	Sanya	×Nip F1	6.9	13.75	85.95	35.3333	22.1283	NA
B092	indica	Sanya	×Nip F1	8.6	18.1	110.3	19	6.89	29.4194
B093	indica	Sanya	×Nip F1	7.33333	11	81.4167	28	9.62	26
B094	indica	Sanya	×Nip F1	6.925	12.8	84.2	28.25	9.775	23.5909
B095	indica	Sanya	×Nip F1	6.58333	11.1667	74.3333	NA	NA	NA
B096	indica	Sanya	×Nip F1	NA	NA	NA	NA	NA	NA
B097	indica	Sanya	×Nip F1	8.1	14.8	94.9	23.2	8.832	27.1396
B100	japonica	Sanya	×Nip F1	8.2	16.7	96.9	8.91667	15.295	25.8068
B101	japonica	Sanya	×Nip F1	8.25	14.25	79.5	26.125	17.5038	21.74
B102	japonica	Sanya	×Nip F1	8.6	15.4	98.4	13.625	24.0837	24.52
B103	japonica	Sanya	×Nip F1	10.8	27.9	150.325	9.15	31.9911	26.64
B104	indica	Sanya	×Nip F1	9.9	18.5	120.9	37.4333	14.2243	27.1556
B105	indica	Sanya	×Nip F1	7.6	14.8	94.2	45.3333	13.59	23.8686
B106	indica	Sanya	×Nip F1	8.5	9.5	66	NA	NA	NA
B107	indica	Sanya	×Nip F1	8.75	19.7	124	23.5	14.425	25.0787
B108	indica	Sanya	×Nip F1	NA	NA	NA	NA	NA	NA
B109	japonica	Sanya	×Nip F1	NA	NA	NA	NA	NA	NA
B110	japonica	Sanya	×Nip F1	7.9	19.2	111.5	9.5	16.9693	31.2
B111	japonica	Sanya	×Nip F1	8.66667	22	140	9	23.59	31.0215
B112	indica	Sanya	×Nip F1	9.8	22.2	130.4	17	7.465	26.8243
B113	indica	Sanya	×Nip F1	7.75	12.5	82	22.5	13.395	NA
B114	indica	Sanya	×Nip F1	9.35	23.1	128.5	21.7	7.975	24.375
B115	indica	Sanya	×Nip F1	9.5	21.5417	130.583	17	13.9033	23.7363
B116	indica	Sanya	×Nip F1	6.9	11.7	75.3	15.3333	9.55667	NA
B117	japonica	Sanya	×Nip F1	9.1	17.6667	111.125	7.83333	17.3137	29.1765
B118	indica	Sanya	×Nip F1	8.2	11.4	77.8	32.75	14.8175	NA
B119	indica	Sanya	×Nip F1	7.7	13	85.6	28.7	9.479	25.0938
B120	indica	Sanya	×Nip F1	NA	NA	NA	NA	NA	NA
B121	indica	Sanya	×Nip F1	8	16.3	101.7	24.7917	9.45833	26.2082
B122	japonica	Sanya	×Nip F1	7.625	13.375	88.7667	11.4167	12.945	22.91
B123	indica	Sanya	×Nip F1	7.2	14.3	88.2	27.675	12.2005	24.9118
B124	japonica	Sanya	×Nip F1	6.33333	11	69.6667	11.25	19.4305	29.29
B125	indica	Sanya	×Nip F1	7.5	13.7	85.6	43.4	15.829	23.49
B126	indica	Sanya	×Nip F1	7.66667	16.5	97.3333	39.75	16.5975	23.7037
B127	indica	Sanya	×Nip F1	8	14.9	96.6	30.9	14.401	22.12
B128	indica	Sanya	×Nip F1	NA	NA	NA	NA	NA	NA
B129	indica	Sanya	×Nip F1	6.8	12.7	83.2	31.2	9.954	24.4275
B130	indica	Sanya	×Nip F1	8.1	15.4	98.7	42.4	18.3495	26.345
B131	indica	Sanya	×Nip F1	8.025	15.425	97.425	31.4667	15.6117	24.8235
B132	indica	Sanya	×Nip F1	10.2	21.4	131.1	54.75	11.8675	23.0556
B133	indica	Sanya	×Nip F1	8.15	12.5	NA	28.5	NA	NA
B134	japonica	Sanya	×Nip F1	NA	NA	NA	NA	NA	NA
B135	indica	Sanya	×Nip F1	8.33333	15.6667	83	32	18.21	NA
B136	japonica	Sanya	×Nip F1	10.4	23.7	137.1	11.5	28.644	28.29
B137	indica	Sanya	×Nip F1	6.9	13.9	83.2	35.5	11.6437	25.1902
B138	indica	Sanya	×Nip F1	8	16.75	104.917	31.5	11.0525	23.9459
B139	indica	Sanya	×Nip F1	9.2	27.5	159.667	5.8	21.266	NA
B140	indica	Sanya	×Nip F1	NA	NA	NA	NA	NA	NA
B141	indica	Sanya	×Nip F1	7.6	16.1	113.8	7.75	15.7967	30.41
B142	japonica	Sanya	×Nip F1	10.25	33.75	181.5	19	29.67	NA
B143	japonica	Sanya	×Nip F1	6.4	10.8	78.2	9	7.74	25.22
B144	japonica	Sanya	×Nip F1	8.7	21.1	118.9	11.3	18.771	30.29
B145	indica	Sanya	×Nip F1	NA	NA	NA	NA	NA	NA
B146	indica	Sanya	×Nip F1	9.8	20.9	120.5	28.9	10.663	26.2671
B147	indica	Sanya	×Nip F1	9	14	179.6	25	7.29	26.3636
B148	japonica	Sanya	×Nip F1	10.75	26.1667	147	8.33333	15.84	NA
B149	indica	Sanya	×Nip F1	NA	NA	NA	NA	NA	NA
B150	indica	Sanya	×Nip F1	7.23333	13.3333	86.8	62.75	19.7375	22.2283
B151	indica	Sanya	×Nip F1	7.2	15.2	91	24.6667	8.93167	NA
B152	japonica	Sanya	×Nip F1	5.7	9.1	58.4333	15.4583	7.48417	22.5
B153	indica	Sanya	×Nip F1	9.5	26.8333	154	29.635	22.0508	23.27
B154	japonica	Sanya	×Nip F1	7	14.5	92.5	9	11.39	26.275
B155	indica	Sanya	×Nip F1	7.41667	14.9167	87.4167	36.4412	23.06	24.48
B156	indica	Sanya	×Nip F1	8.3	14.9	98.9	30.8333	20.5173	30.395
B157	indica	Sanya	×Nip F1	8.4	15.6	95.2	26.5	15.318	26.95
B158	indica	Sanya	×Nip F1	7	14.25	86	10	14.45	NA
B159	indica	Sanya	×Nip F1	NA	NA	NA	NA	NA	NA
B160	japonica	Sanya	×Nip F1	NA	NA	NA	NA	NA	NA
B161	japonica	Sanya	×Nip F1	6.9	7.23333	59.6667	15.6	22.165	29.1
B162	japonica	Sanya	×Nip F1	5.25	5.125	39.9	21.3333	12.0583	26.25
B163	indica	Sanya	×Nip F1	7.7	13.75	84.3	29.75	13.747	29.96
B164	indica	Sanya	×Nip F1	NA	NA	NA	NA	NA	NA
B165	indica	Sanya	×Nip F1	NA	NA	NA	NA	NA	NA
B166	japonica	Sanya	×Nip F1	NA	NA	NA	NA	NA	NA
B167	japonica	Sanya	×Nip F1	NA	NA	NA	NA	NA	NA
B168	japonica	Sanya	×Nip F1	5.33333	10	62.6667	7.5	8.52	25.94
B169	japonica	Sanya	×Nip F1	6.8	13.6	82.1	17.7333	23.187	25.11
B170	japonica	Sanya	×Nip F1	7.5	14.5	88	11	16.455	26.4
B171	japonica	Sanya	×Nip F1	8.6	15	96	37.5	23.585	25.3725
B173	indica	Sanya	×Nip F1	7.4	15.3	95.1	17.75	16.565	NA
B176	indica	Sanya	×Nip F1	8.6	20.8	113.6	39	13.1425	23.7
B179	japonica	Sanya	×Nip F1	NA	NA	NA	NA	NA	NA
B180	indica	Sanya	×Nip F1	7	14	90.6	41	11.94	19.9
B181	indica	Sanya	×Nip F1	9.05	19.9	118.8	39	13.254	21.5
B182	japonica	Sanya	×Nip F1	7.41667	13.8333	86	14	21.56	NA
B183	japonica	Sanya	×Nip F1	6	10	65.6667	19.5	18.19	24.647
B184	indica	Sanya	×Nip F1	9.4	22.4	135.8	18.75	19.1265	24.1
B185	indica	Sanya	×Nip F1	8.83333	22.8333	133.867	33.2	18.712	24.7556
B187	indica	Sanya	×Nip F1	8	19.2333	115.4	32.1	19.35	22.07
B188	japonica	Sanya	×Nip F1	10.4	25.45	149.75	13.4	34.259	28.3
B189	japonica	Sanya	×Nip F1	7	14.5	99.5	21.375	23.9988	26.2609
B190	japonica	Sanya	×Nip F1	6.6	15.4	95.7	29.85	16.794	22.15
B191	japonica	Sanya	×Nip F1	8.675	19.95	118.525	23.375	12.515	29.8222
B192	indica	Sanya	×Nip F1	NA	NA	NA	NA	NA	NA
B193	indica	Sanya	×Nip F1	8.04167	16.2083	98.6667	39.3333	12.2833	25.2093
B194	indica	Sanya	×Nip F1	7	13.75	84.125	25	9.34333	26.3333
B195	indica	Sanya	×Nip F1	8.33333	19.25	116.5	25.25	21.8225	24.4919
B196	japonica	Sanya	×Nip F1	NA	NA	NA	NA	NA	NA
B197	indica	Sanya	×Nip F1	9	20	119.5	9	7.08	25.3
B198	indica	Sanya	×Nip F1	8.725	19.1	108.35	29.45	14.1365	28.3943
B199	japonica	Sanya	×Nip F1	6.5	11.5	71	11	8.04	25.9739
B200	indica	Sanya	×Nip F1	9.1	21	121.1	34.2	10.068	21.6
B201	indica	Sanya	×Nip F1	9.5	19.8	123.4	32.9667	14.055	25.0667
B202	indica	Sanya	×Nip F1	NA	NA	NA	NA	NA	NA
B203	indica	Sanya	×Nip F1	7.58333	13.4167	88.5	38.75	15.2775	22.4
B204	japonica	Sanya	×Nip F1	9.13333	18.1333	107.1	10.25	23.3412	28.61
B205	japonica	Sanya	×Nip F1	6.5	6.5	46.5	NA	NA	NA
B207	indica	Sanya	×Nip F1	7.5	12.1	81.4	30.75	11.94	26.54
B208	indica	Sanya	×Nip F1	NA	NA	NA	NA	NA	NA
B210	indica	Sanya	×Nip F1	6.4	12	76.4	34.2	9.272	23.38
B212	japonica	Sanya	×Nip F1	6.33333	10.1667	67.3333	49	13.33	NA
B213	indica	Sanya	×Nip F1	10.2	26.2	153.2	16.1	19.445	24.1892
B214	indica	Sanya	×Nip F1	6.4	11.4	78.7	26.6	7.967	23.956
B215	japonica	Sanya	×Nip F1	9.6	19.6	119.6	11.75	12.8	28.0437
B216	indica	Sanya	×Nip F1	NA	NA	NA	NA	NA	NA
B217	indica	Sanya	×Nip F1	6.91667	13.5	83.0833	18.5	10.215	24.3929
B218	japonica	Sanya	×Nip F1	7.4	16.8	101.8	9.25	15.515	25.57
B219	indica	Sanya	×Nip F1	6.125	10	67.875	36	15.4267	29.3023
B221	indica	Sanya	×Nip F1	7.9	14.1	97.1	23.3333	9.4125	25.3415
B222	indica	Sanya	×Nip F1	9.25	20.25	119	12	4.9	NA
B223	japonica	Sanya	×Nip F1	9	19	120.5	16.5	22.72	25.99
B224	indica	Sanya	×Nip F1	6.75	9.5	68.75	35	20.18	NA
B225	japonica	Sanya	×Nip F1	10.8333	27.1667	151.833	6	10.58	26.6133
B226	japonica	Sanya	×Nip F1	NA	NA	NA	NA	NA	NA
B227	indica	Sanya	×Nip F1	11.4333	22.6667	143.867	16.1	23.793	27.16
B228	japonica	Sanya	×Nip F1	6.85	9.6	70.85	15.6667	5.98767	22.0913
B229	indica	Sanya	×Nip F1	8.75	17.25	107	29	10.32	21.8182
B230	japonica	Sanya	×Nip F1	NA	NA	NA	NA	NA	NA
B231	indica	Sanya	×Nip F1	6.1	8.8	61.1	38.4	8.23	20.94
B232	indica	Sanya	×Nip F1	7	12.9	85.3	19.2917	10.8717	25.3595
B233	indica	Sanya	×Nip F1	6.8	11.9	85.4	35.475	12.8105	23.756
B234	indica	Sanya	×Nip F1	9.25	21	128.5	31	35.06	NA
B235	japonica	Sanya	×Nip F1	6.375	13.875	81.125	13	17.5133	25.88
B236	japonica	Sanya	×Nip F1	5.46667	10.5333	64.3333	13.75	17.9995	29.89
B238	indica	Sanya	×Nip F1	8.1	15.8	102.7	24.8	17.131	27.43
B239	indica	Sanya	×Nip F1	NA	NA	NA	NA	NA	NA
B240	japonica	Sanya	×Nip F1	5.875	8.625	58.125	17.5	24.2933	26.75
B241	japonica	Sanya	×Nip F1	5.6	9.2	65.2	20	10.284	28.24
B242	indica	Sanya	×Nip F1	8.6	18.4	114	26.2	12.152	NA
B243	indica	Sanya	×Nip F1	8.2	17.2	103.1	24.7	12.739	25.19
B244	indica	Sanya	×Nip F1	9.675	22.875	133.625	20.2083	18.7596	27.48
B245	japonica	Sanya	×Nip F1	7.66667	14.6667	237.667	11	19.81	NA
B246	indica	Sanya	×Nip F1	8.4	16.25	102.2	27	7.9	NA
B247	indica	Sanya	×Nip F1	NA	NA	NA	NA	NA	NA
B248	indica	Sanya	×Nip F1	7.66667	14.3333	89	38.5	16.675	27.0263
B249	indica	Sanya	×Nip F1	7	12.7	79.3	32.4	11.2	24.5483
B250	japonica	Sanya	×Nip F1	NA	NA	NA	NA	NA	NA
B252	indica	Sanya	×Nip F1	4.5	5.5	40.5	7	36.09	NA
B253	indica	Sanya	×Nip F1	7.6	16.4	100.8	19.5	33.0337	25.6241
B254	indica	Sanya	×Nip F1	7.8	16.25	98.45	14.1	8.6295	25.4737
B255	indica	Sanya	×Nip F1	7.4	15.5	95.575	30.6	12.5017	24.94
B258	japonica	Sanya	×Nip F1	NA	NA	NA	NA	NA	NA
B259	indica	Sanya	×Nip F1	9.75	23.5	135.75	15	8.91	27.93
B260	indica	Sanya	×Nip F1	9	21	106	16	9.75	20.7083
B261	indica	Sanya	×Nip F1	8.9	15.2	99.3	29.675	10.0983	21.2923
B263	japonica	Sanya	×Nip F1	8.5	15.7	104.5	28.4667	14.5827	24.36
B264	indica	Sanya	×Nip F1	7.6	16.6	106.8	31.6667	29.6067	29.01
B265	indica	Sanya	×Nip F1	6.66667	10.8333	72.5	32.3333	12.26	23.6933
B266	japonica	Sanya	×Nip F1	NA	NA	NA	NA	NA	NA
B268	indica	Sanya	×Nip F1	8.5	23.5	131	17	9.04	28.0469
B269	japonica	Sanya	×Nip F1	7	11.5	71.75	6	8.52	21.99
YB10_1	japonica	Sanya	×Nip F1	6.3	13.2	83.6667	12.4	23.219	28.5333
YB11_1	japonica	Sanya	×Nip F1	6.1	12.0333	75.2	19.775	28.111	29.03
YB12_1	japonica	Sanya	×Nip F1	8.8	17	108.1	18.4	44.362	NA
YB14_1	japonica	Sanya	×Nip F1	10.55	25.05	148.9	10	24.59	29.49
YB15_1	indica	Sanya	×Nip F1	8.5	16.7	104.3	26.05	12.4258	25.812
YB16_1	indica	Sanya	×Nip F1	6	12.8	85	53.6667	21.43	20.52
YB17_1	japonica	Sanya	×Nip F1	10	26.4	146.9	15.975	22.4355	21.71
YB18_1	indica	Sanya	×Nip F1	9.5	16.5	99	NA	NA	NA
YB19_1	japonica	Sanya	×Nip F1	8.66667	20.25	120.417	18.42	17.315	22.41
YB1_1	japonica	Sanya	×Nip F1	8.9	21.8	133.1	10.125	18.6713	23.73
YB20_1	japonica	Sanya	×Nip F1	8.3	18.3	109.1	10.8333	26.0246	25.89
YB22_1	japonica	Sanya	×Nip F1	8.1	13.7	91.9	8.35	19.3925	31.53
YB24_1	japonica	Sanya	×Nip F1	7.1	12.1	76.4	8.66667	16.4817	27.59
YB2_1	japonica	Sanya	×Nip F1	9	21.7	127.2	31.4	19.912	27.1233
YB4_1	indica	Sanya	×Nip F1	9.25	19.15	119.5	33.1667	11.7767	24.5278
YB5_1	indica	Sanya	×Nip F1	8.66667	17	105.967	27.5	21.9225	27.49
YB6_1	japonica	Sanya	×Nip F1	NA	NA	NA	NA	NA	NA
YB7_1	japonica	Sanya	×Nip F1	6.1	10.1	60	12.9	12.771	25.5532
YB8_1	japonica	Sanya	×Nip F1	6.41667	10.25	66.0833	11.5	11.005	24.4923
YB9_1	indica	Sanya	×Nip F1	7.25	15.25	95.75	30.3333	9.62667	26.0403
9311	indica	Sanya	×9311 F1	NA	NA	NA	NA	NA	NA
Nipponbare	japonica	Sanya	×9311 F1	NA	NA	NA	NA	NA	NA
B001	japonica	Sanya	×9311 F1	NA	NA	NA	NA	NA	NA
B002	japonica	Sanya	×9311 F1	NA	NA	NA	NA	NA	26.7153
B003	japonica	Sanya	×9311 F1	9.41667	24.75	137.333	20.5	9.4555	22.34
B004	japonica	Sanya	×9311 F1	9.76667	23.0333	142.2	17.4	14.114	27.26
B005	japonica	Sanya	×9311 F1	10.875	27.875	155.2	24.5	15.8092	23.6632
B006	indica	Sanya	×9311 F1	NA	NA	NA	NA	NA	25.64
B007	indica	Sanya	×9311 F1	NA	NA	NA	NA	NA	26.44
B008	japonica	Sanya	×9311 F1	NA	NA	NA	NA	NA	NA
B009	indica	Sanya	×9311 F1	NA	NA	NA	NA	NA	31.75
B010	indica	Sanya	×9311 F1	13.25	32.25	197.75	NA	NA	26.14
B011	indica	Sanya	×9311 F1	NA	NA	NA	NA	NA	24.2
B012	indica	Sanya	×9311 F1	11.8	34.1	191.6	11.3	16.372	27.54
B013	indica	Sanya	×9311 F1	NA	NA	NA	NA	NA	25.6
B014	japonica	Sanya	×9311 F1	NA	NA	NA	NA	NA	25.76
B015	indica	Sanya	×9311 F1	13.1667	43.3333	246.167	13.6667	53.3158	25.96
B016	japonica	Sanya	×9311 F1	NA	NA	NA	NA	NA	NA
B017	japonica	Sanya	×9311 F1	10.7	27.3	150.2	15.3333	16.8283	30.4
B018	japonica	Sanya	×9311 F1	11.3	27.3	161.1	15.7	40.757	26.73
B019	indica	Sanya	×9311 F1	NA	NA	NA	NA	NA	NA
B020	indica	Sanya	×9311 F1	13.1667	34	218.167	NA	NA	30.36
B021	indica	Sanya	×9311 F1	NA	NA	NA	NA	NA	NA
B023	japonica	Sanya	×9311 F1	11.4167	28.9583	161.458	14.5	12.7637	22.05
B024	indica	Sanya	×9311 F1	14.1	44.3	239.9	10.175	46.238	27.42
B025	japonica	Sanya	×9311 F1	13.375	37.0833	214.5	9.4	21.6728	32.34
B026	indica	Sanya	×9311 F1	15.2	44.65	228.2	11.75	22.2905	26.77
B027	indica	Sanya	×9311 F1	14.2	40.7	239.4	10.7083	41.0838	26.02
B028	indica	Sanya	×9311 F1	11.5	28.6	168.6	11.2	31.7355	27.22
B029	indica	Sanya	×9311 F1	NA	NA	NA	16.875	21.805	25.88
B030	indica	Sanya	×9311 F1	NA	NA	NA	12.9167	39.3067	26.66
B031	indica	Sanya	×9311 F1	13.875	48.95	279.5	NA	NA	24.06
B032	indica	Sanya	×9311 F1	11.85	34.65	203.2	11.5417	20.5321	28.15
B033	indica	Sanya	×9311 F1	12.225	32.475	216	NA	NA	24.57
B034	japonica	Sanya	×9311 F1	NA	NA	NA	NA	NA	NA
B035	indica	Sanya	×9311 F1	13.6	43.3	240.4	11.275	40.5592	23.98
B036	japonica	Sanya	×9311 F1	13.7	39.7667	214.467	10.3	24.9515	29.71
B037	japonica	Sanya	×9311 F1	12.1	34.7	187.7	9.5	16.3487	28.11
B038	japonica	Sanya	×9311 F1	NA	NA	NA	NA	NA	NA
B039	indica	Sanya	×9311 F1	12.4	37	200.4	8.925	26.125	25.15
B040	indica	Sanya	×9311 F1	14	41.6667	249.667	9.75	33.0692	24.05
B043	japonica	Sanya	×9311 F1	NA	NA	NA	NA	NA	26.5
B044	indica	Sanya	×9311 F1	13.8	37.1	208.2	10	22.299	31.12
B045	japonica	Sanya	×9311 F1	NA	NA	NA	NA	NA	NA
B046	japonica	Sanya	×9311 F1	11.9	35.1	192.8	19.85	14.7978	28.71
B047	japonica	Sanya	×9311 F1	NA	NA	NA	NA	NA	NA
B048	indica	Sanya	×9311 F1	11.95	36.55	186.475	8.45	25.3415	27.13
B049	indica	Sanya	×9311 F1	NA	NA	NA	NA	NA	NA
B051	indica	Sanya	×9311 F1	12.2	32.4	189.5	12.4	32.918	25.35
B052	indica	Sanya	×9311 F1	12.4	38.1	222.3	11.675	26.0275	27.1
B053	japonica	Sanya	×9311 F1	12.375	35.5	195.875	7.66667	18.0083	26.81
B054	japonica	Sanya	×9311 F1	NA	NA	NA	NA	NA	NA
B055	japonica	Sanya	×9311 F1	NA	NA	NA	NA	NA	27.006
B056	japonica	Sanya	×9311 F1	NA	NA	NA	NA	NA	NA
B057	japonica	Sanya	×9311 F1	NA	NA	NA	NA	NA	NA
B058	indica	Sanya	×9311 F1	NA	NA	NA	NA	NA	29.59
B059	indica	Sanya	×9311 F1	15.2	50.2	256.1	9.2	35.564	22.31
B060	indica	Sanya	×9311 F1	13.8	41.2	233	11.75	45.6812	28.24
B061	indica	Sanya	×9311 F1	12.75	32.25	184.625	7.5	25.055	26.56
B062	indica	Sanya	×9311 F1	NA	NA	NA	NA	NA	NA
B063	indica	Sanya	×9311 F1	NA	NA	NA	NA	NA	25.7
B064	indica	Sanya	×9311 F1	13.2	41.3	224.2	7.925	26.7147	25.77
B065	indica	Sanya	×9311 F1	14	48.6	283.1	9.025	32.221	21.49
B066	japonica	Sanya	×9311 F1	NA	NA	NA	NA	NA	NA
B067	indica	Sanya	×9311 F1	NA	NA	NA	NA	NA	NA
B068	japonica	Sanya	×9311 F1	10.7	22.5	144.4	14.225	13.5732	27.9333
B069	japonica	Sanya	×9311 F1	NA	NA	NA	NA	NA	28.74
B070	japonica	Sanya	×9311 F1	NA	NA	NA	NA	NA	28.29
B071	japonica	Sanya	×9311 F1	12.2	30.575	171.375	14	16.7675	28.154
B072	indica	Sanya	×9311 F1	14.1	40.7	210.9	10.9	40.062	24.91
B073	indica	Sanya	×9311 F1	11.4167	24.3333	146.25	21.75	61.5325	27.73
B074	indica	Sanya	×9311 F1	12.5	35.0833	206.833	8	23.885	25.4
B075	indica	Sanya	×9311 F1	NA	NA	NA	NA	NA	NA
B076	indica	Sanya	×9311 F1	NA	NA	NA	NA	NA	NA
B077	japonica	Sanya	×9311 F1	12.1	30.9	188.1	NA	NA	NA
B079	indica	Sanya	×9311 F1	11.25	46.025	246.825	8.125	43.82	25.82
B081	indica	Sanya	×9311 F1	13.9	47.2	233.15	8.375	30.7013	28.21
B082	indica	Sanya	×9311 F1	10.6667	30.1333	163.767	18.5	54.6337	25.25
B083	indica	Sanya	×9311 F1	11.9167	35	201.083	9.125	25.4088	23.65
B084	japonica	Sanya	×9311 F1	14.5	44.6	248.9	7.7	34.159	23.61
B085	indica	Sanya	×9311 F1	14.9333	48.5333	268.367	10.125	44.615	26.08
B086	japonica	Sanya	×9311 F1	NA	NA	NA	NA	NA	NA
B087	indica	Sanya	×9311 F1	14.75	42.6667	272.5	17	56.53	23.79
B088	indica	Sanya	×9311 F1	NA	NA	NA	NA	NA	25.1
B089	indica	Sanya	×9311 F1	NA	NA	NA	NA	NA	NA
B090	indica	Sanya	×9311 F1	NA	NA	NA	NA	NA	27.21
B091	indica	Sanya	×9311 F1	12.9	42.25	173.7	14.25	54.815	25.33
B092	indica	Sanya	×9311 F1	14.5	41.9333	235.967	NA	NA	25.8
B093	indica	Sanya	×9311 F1	13.525	41.9	173.633	12.125	48.0838	27.48
B094	indica	Sanya	×9311 F1	13.125	39.2917	216.083	NA	NA	25.3
B095	indica	Sanya	×9311 F1	14	48.4	256.7	9.3	43.4743	26.1
B096	indica	Sanya	×9311 F1	15.8	50.2	285.9	7.25	34.5087	25.61
B097	indica	Sanya	×9311 F1	NA	NA	NA	NA	NA	NA
B100	japonica	Sanya	×9311 F1	NA	NA	NA	NA	NA	NA
B101	japonica	Sanya	×9311 F1	11.8	29.6	133.1	13.9	16.95	28.67
B102	japonica	Sanya	×9311 F1	11.8	28.7	140.1	12.45	15.6333	25.55
B103	japonica	Sanya	×9311 F1	NA	NA	NA	NA	NA	NA
B104	indica	Sanya	×9311 F1	15.6	44.2	260.2	11.875	43.51	22.67
B105	indica	Sanya	×9311 F1	NA	NA	NA	NA	NA	20.44
B106	indica	Sanya	×9311 F1	12.25	23.25	156.75	NA	NA	NA
B107	indica	Sanya	×9311 F1	11.1	26.5667	159.633	10.6	41.586	29.38
B108	indica	Sanya	×9311 F1	15.5	51.25	308.15	NA	NA	NA
B109	japonica	Sanya	×9311 F1	12.8	30.65	202.7	8.75	11.7363	29.5094
B110	japonica	Sanya	×9311 F1	14	46.1	258.1	7	10.6738	28.13
B111	japonica	Sanya	×9311 F1	14.25	53.125	318.825	6.75	13.725	29.1467
B112	indica	Sanya	×9311 F1	14.1	47.1	269.1	9.4	34.335	26.09
B113	indica	Sanya	×9311 F1	14.85	50.9	267.6	10.2	39.537	25.25
B114	indica	Sanya	×9311 F1	NA	NA	NA	NA	NA	NA
B115	indica	Sanya	×9311 F1	14.6	46.8	265.2	9.3	40.716	26.38
B116	indica	Sanya	×9311 F1	14	45.6	252.6	10.3	35.534	26.03
B117	japonica	Sanya	×9311 F1	14.55	43.95	223.95	12.225	21.3283	29.36
B118	indica	Sanya	×9311 F1	11.8333	22.8	145.8	NA	NA	NA
B119	indica	Sanya	×9311 F1	NA	NA	NA	NA	NA	NA
B120	indica	Sanya	×9311 F1	12	28.5833	159.417	NA	NA	NA
B121	indica	Sanya	×9311 F1	14.0833	42.3333	243.25	9	38.15	26.2082
B122	japonica	Sanya	×9311 F1	14.5	43.6	245.6	13.15	21.6152	25.8372
B123	indica	Sanya	×9311 F1	12.8333	38.3667	215.733	8.25	36.3088	26.68
B124	japonica	Sanya	×9311 F1	NA	NA	NA	NA	NA	27.485
B125	indica	Sanya	×9311 F1	NA	NA	NA	NA	NA	NA
B126	indica	Sanya	×9311 F1	NA	NA	NA	NA	NA	NA
B127	indica	Sanya	×9311 F1	13.2	35.7	208.7	10.05	38.1157	28.44
B128	indica	Sanya	×9311 F1	NA	NA	NA	NA	NA	NA
B129	indica	Sanya	×9311 F1	11.7	29.3	168.2	NA	NA	22.19
B130	indica	Sanya	×9311 F1	14.2333	40.3	214.767	11.9583	38.2238	25.67
B131	indica	Sanya	×9311 F1	NA	NA	NA	NA	NA	NA
B132	indica	Sanya	×9311 F1	NA	NA	NA	NA	NA	27.65
B133	indica	Sanya	×9311 F1	9.96667	25.8333	152.7	17.8333	41.7983	24.59
B134	japonica	Sanya	×9311 F1	NA	NA	NA	NA	NA	NA
B135	indica	Sanya	×9311 F1	9.725	27.5667	145.1	15.5833	27.46	26.64
B136	japonica	Sanya	×9311 F1	NA	NA	NA	NA	NA	NA
B137	indica	Sanya	×9311 F1	NA	NA	NA	NA	NA	NA
B138	indica	Sanya	×9311 F1	14	48.95	254.55	13.125	54.2638	25.13
B139	indica	Sanya	×9311 F1	15.5	75.25	359.167	9.5	46.13	25.41
B140	indica	Sanya	×9311 F1	NA	NA	NA	NA	NA	30.5
B141	indica	Sanya	×9311 F1	NA	NA	NA	NA	NA	28.34
B142	japonica	Sanya	×9311 F1	14.4	62.6	305.2	13.45	16.432	26.3
B143	japonica	Sanya	×9311 F1	12	37.1	187.2	11.9	25.4017	29.63
B144	japonica	Sanya	×9311 F1	15.6	54.55	289.6	10.8	34.44	27.17
B145	indica	Sanya	×9311 F1	NA	NA	NA	NA	NA	NA
B146	indica	Sanya	×9311 F1	NA	NA	NA	NA	NA	NA
B147	indica	Sanya	×9311 F1	NA	NA	NA	NA	NA	28.6
B148	japonica	Sanya	×9311 F1	12.6	40.4	220.4	9.05	13.3615	31.7135
B149	indica	Sanya	×9311 F1	NA	NA	NA	NA	NA	31
B150	indica	Sanya	×9311 F1	13.5	42	228.25	17	NA	26.41
B151	indica	Sanya	×9311 F1	12.875	37.875	204.875	12.4167	35.9983	22.54
B152	japonica	Sanya	×9311 F1	11.05	29.425	158.425	34.6667	17.92	25.9459
B153	indica	Sanya	×9311 F1	NA	NA	NA	NA	NA	NA
B154	japonica	Sanya	×9311 F1	10.25	28.5	126	21	10.96	24.9704
B155	indica	Sanya	×9311 F1	NA	NA	NA	NA	NA	29.2473
B156	indica	Sanya	×9311 F1	NA	NA	NA	15	43.567	30.77
B157	indica	Sanya	×9311 F1	13.0333	43.8667	232.733	10.1667	32.2592	27.63
B158	indica	Sanya	×9311 F1	NA	NA	NA	NA	NA	NA
B159	indica	Sanya	×9311 F1	NA	NA	NA	NA	NA	NA
B160	japonica	Sanya	×9311 F1	NA	NA	NA	NA	NA	NA
B161	japonica	Sanya	×9311 F1	NA	NA	NA	NA	NA	NA
B162	japonica	Sanya	×9311 F1	NA	NA	NA	NA	NA	NA
B163	indica	Sanya	×9311 F1	12.25	28.875	182.125	11.3	17.493	25.48
B164	indica	Sanya	×9311 F1	12.8	39.2	209.733	7.375	24.0087	29.73
B165	indica	Sanya	×9311 F1	13.1	44.375	227.667	NA	41.215	31.64
B166	japonica	Sanya	×9311 F1	11.4	32.8	192.433	17.3	12.873	24.25
B167	japonica	Sanya	×9311 F1	NA	NA	NA	NA	NA	NA
B168	japonica	Sanya	×9311 F1	NA	NA	NA	NA	NA	NA
B169	japonica	Sanya	×9311 F1	NA	NA	NA	NA	NA	NA
B170	japonica	Sanya	×9311 F1	NA	NA	NA	NA	NA	NA
B171	japonica	Sanya	×9311 F1	NA	NA	NA	NA	NA	NA
B173	indica	Sanya	×9311 F1	NA	NA	NA	NA	NA	NA
B176	indica	Sanya	×9311 F1	13.2	45.2	236	10	39.4715	26.24
B179	japonica	Sanya	×9311 F1	NA	NA	NA	NA	NA	NA
B180	indica	Sanya	×9311 F1	NA	NA	NA	NA	NA	NA
B181	indica	Sanya	×9311 F1	13.7	34.9	188.9	10.7	23.917	26.48
B182	japonica	Sanya	×9311 F1	NA	NA	NA	NA	NA	NA
B183	japonica	Sanya	×9311 F1	10.25	24.8333	140.417	NA	NA	23.13
B184	indica	Sanya	×9311 F1	14	34.4	208.2	16.875	41.0521	24.09
B185	indica	Sanya	×9311 F1	14.5	42.6	232.1	11.625	38.606	29.2
B187	indica	Sanya	×9311 F1	NA	NA	NA	NA	NA	NA
B188	japonica	Sanya	×9311 F1	13.8	32.35	209.65	9.8	19.129	30.76
B189	japonica	Sanya	×9311 F1	13.525	35.325	209.35	9	29.0742	32.45
B190	japonica	Sanya	×9311 F1	14.3333	41.5	237.167	7	20.4225	30.2381
B191	japonica	Sanya	×9311 F1	NA	NA	NA	NA	NA	NA
B192	indica	Sanya	×9311 F1	NA	NA	NA	NA	NA	NA
B193	indica	Sanya	×9311 F1	NA	NA	NA	NA	NA	27.5778
B194	indica	Sanya	×9311 F1	13.25	39.375	213	9.08333	33.4325	26.22
B195	indica	Sanya	×9311 F1	14.25	47	250.5	9	24.23	16.8204
B196	japonica	Sanya	×9311 F1	NA	NA	NA	NA	NA	30.33
B197	indica	Sanya	×9311 F1	NA	NA	NA	NA	NA	25.88
B198	indica	Sanya	×9311 F1	9.73333	23.8667	200.4	NA	NA	NA
B199	japonica	Sanya	×9311 F1	NA	NA	NA	NA	NA	NA
B200	indica	Sanya	×9311 F1	NA	NA	NA	NA	NA	NA
B201	indica	Sanya	×9311 F1	13.7333	44.6	245.167	8.16667	34.9275	28.36
B202	indica	Sanya	×9311 F1	12.15	34.95	179.35	11.5	32.786	27.61
B203	indica	Sanya	×9311 F1	13	35.1	204.9	13.1	45.676	27.34
B204	japonica	Sanya	×9311 F1	NA	NA	NA	NA	NA	NA
B205	japonica	Sanya	×9311 F1	11.75	28.15	169.8	13.125	13.1825	29.8919
B207	indica	Sanya	×9311 F1	11.2	26.1	156.05	11.4667	38.688	30.75
B208	indica	Sanya	×9311 F1	NA	NA	NA	NA	NA	24.47
B210	indica	Sanya	×9311 F1	NA	NA	NA	NA	NA	21.77
B212	japonica	Sanya	×9311 F1	11.7667	33.6667	178.767	9.375	6.598	26.1364
B213	indica	Sanya	×9311 F1	12.2	28.55	157.05	9.4	36.073	29.61
B214	indica	Sanya	×9311 F1	13.0417	40.2917	221.333	11.3333	38.945	26.23
B215	japonica	Sanya	×9311 F1	11.1333	26.3333	143	13.5	10.4483	29.59
B216	indica	Sanya	×9311 F1	13.4	41.6	224.8	10.8	39.3267	26.95
B217	indica	Sanya	×9311 F1	13.925	41.4	242.375	10.8	43.962	26.72
B218	japonica	Sanya	×9311 F1	12.4	37.4	196.1	NA	NA	27.2
B219	indica	Sanya	×9311 F1	12	30.4	168.6	10.375	11.9938	27.5129
B221	indica	Sanya	×9311 F1	10.4	25.25	149.7	NA	NA	25.7
B222	indica	Sanya	×9311 F1	NA	NA	NA	NA	NA	NA
B223	japonica	Sanya	×9311 F1	13.8	40.2	222.4	10	24.172	32.58
B224	indica	Sanya	×9311 F1	NA	NA	NA	NA	NA	25.72
B225	japonica	Sanya	×9311 F1	13.8333	39.4167	147.717	15.1667	26.0017	24.38
B226	japonica	Sanya	×9311 F1	NA	NA	NA	NA	NA	NA
B227	indica	Sanya	×9311 F1	10.4	23.5667	224.3	12.875	45.037	26.62
B228	japonica	Sanya	×9311 F1	NA	NA	NA	NA	NA	NA
B229	indica	Sanya	×9311 F1	NA	NA	NA	NA	NA	26.97
B230	japonica	Sanya	×9311 F1	NA	NA	NA	NA	NA	26.6951
B231	indica	Sanya	×9311 F1	11.4	26.6	157.6	12	31.562	29.5
B232	indica	Sanya	×9311 F1	8.875	16.775	107.7	21.55	14.379	26.73
B233	indica	Sanya	×9311 F1	11.8333	32.3333	180.5	15.5	41.8875	28.01
B234	indica	Sanya	×9311 F1	15.4	54.2	302	7.8	37.205	26.87
B235	japonica	Sanya	×9311 F1	NA	NA	NA	NA	NA	NA
B236	japonica	Sanya	×9311 F1	NA	NA	NA	NA	NA	NA
B238	indica	Sanya	×9311 F1	11.75	41.25	233.25	14	40.2575	28.06
B239	indica	Sanya	×9311 F1	13.8	38.5	216.6	13.5	54.78	28.49
B240	japonica	Sanya	×9311 F1	NA	NA	NA	NA	NA	NA
B241	japonica	Sanya	×9311 F1	9.8	24.6	153.45	12.8	11.33	22.9643
B242	indica	Sanya	×9311 F1	NA	NA	NA	NA	NA	NA
B243	indica	Sanya	×9311 F1	13.575	35.45	186.5	13.4667	35.424	25.4
B244	indica	Sanya	×9311 F1	14.875	50.125	277.25	6.35	25.8045	21.95
B245	japonica	Sanya	×9311 F1	13.6	33.6	NA	NA	NA	23.7
B246	indica	Sanya	×9311 F1	NA	NA	NA	NA	NA	NA
B247	indica	Sanya	×9311 F1	12.3667	36.2667	211.933	12.35	33.0275	23.4
B248	indica	Sanya	×9311 F1	11.125	21.125	132.625	NA	NA	NA
B249	indica	Sanya	×9311 F1	NA	NA	NA	NA	NA	25.28
B250	japonica	Sanya	×9311 F1	11.5	28.4	154.2	10.6	13.039	30.0289
B252	indica	Sanya	×9311 F1	NA	NA	NA	NA	NA	NA
B253	indica	Sanya	×9311 F1	13.1	36.9	188.4	14.9	27.15	30.55
B254	indica	Sanya	×9311 F1	13.2	37.3	200.3	9	37.331	30.13
B255	indica	Sanya	×9311 F1	12.25	40.5	199.75	9	30.915	28.22
B258	japonica	Sanya	×9311 F1	NA	NA	NA	NA	NA	NA
B259	indica	Sanya	×9311 F1	NA	NA	NA	NA	NA	26.88
B260	indica	Sanya	×9311 F1	11	24.85	151.5	8.5	5.88875	31.0513
B261	indica	Sanya	×9311 F1	14.725	47.975	269.55	11.275	55.2392	25.55
B263	japonica	Sanya	×9311 F1	12.25	31.25	183	15.5	21.06	27.1843
B264	indica	Sanya	×9311 F1	12.9	40	230.5	11.3	52.8152	29.08
B265	indica	Sanya	×9311 F1	9.4	23.8	136.6	13.325	35.3177	27.99
B266	japonica	Sanya	×9311 F1	11.4583	34.125	185.5	9.23333	17.748	30.37
B268	indica	Sanya	×9311 F1	14.25	46.0833	256.5	9	26.7125	28.97
B269	japonica	Sanya	×9311 F1	NA	NA	NA	NA	NA	NA
YB10_1	japonica	Sanya	×9311 F1	11.8	25.6	169.4	NA	NA	29.52
YB11_1	japonica	Sanya	×9311 F1	11.3333	21.3333	134.833	NA	NA	NA
YB12_1	japonica	Sanya	×9311 F1	12.9167	32.4167	184.625	9	11.2025	29.4545
YB14_1	japonica	Sanya	×9311 F1	NA	NA	NA	NA	NA	NA
YB15_1	indica	Sanya	×9311 F1	14.3	39.8	225.4	10	40.186	27.29
YB16_1	indica	Sanya	×9311 F1	9.4	25.3	146.9	13.7	28.8723	26.24
YB17_1	japonica	Sanya	×9311 F1	NA	NA	NA	NA	NA	NA
YB18_1	indica	Sanya	×9311 F1	11.3	23.8333	140.167	12	25.56	24.02
YB19_1	japonica	Sanya	×9311 F1	13.625	46.4167	257.75	17	25.425	23.84
YB1_1	japonica	Sanya	×9311 F1	12.5	40.5	234.2	7.6	20.565	27.05
YB20_1	japonica	Sanya	×9311 F1	12.6	39.9	224.3	14.5	15.1347	27.79
YB22_1	japonica	Sanya	×9311 F1	NA	NA	NA	NA	NA	31.08
YB24_1	japonica	Sanya	×9311 F1	13	42.1	223.367	14.9303	18.2117	28.5267
YB2_1	japonica	Sanya	×9311 F1	13.5	40.1	221.2	10.2	27.8567	30.25
YB4_1	indica	Sanya	×9311 F1	13.5	39.9	229.7	9.625	30.7898	27.27
YB5_1	indica	Sanya	×9311 F1	13.7667	38.7667	217.867	16.6667	56.785	26.13
YB6_1	japonica	Sanya	×9311 F1	NA	NA	NA	NA	NA	NA
YB7_1	japonica	Sanya	×9311 F1	NA	NA	NA	NA	NA	NA
YB8_1	japonica	Sanya	×9311 F1	NA	NA	NA	NA	NA	NA
YB9_1	indica	Sanya	×9311 F1	13	45.875	248.25	13.5	44.17	19.03
Nipponbare	japonica	Changsha	×Nip Hmp	NA	NA	NA	NA	NA	NA
B001	japonica	Changsha	×Nip Hmp	NA	NA	NA	NA	NA	NA
B002	japonica	Changsha	×Nip Hmp	0.819697	4.21482	18.6558	-1.88796	12.4974	-0.385148
B003	japonica	Changsha	×Nip Hmp	-0.930303	1.71482	6.65579	7.44651	13.9831	0.619389
B004	japonica	Changsha	×Nip Hmp	-0.280303	0.781484	-2.54421	1.98704	7.56739	0.234852
B005	japonica	Changsha	×Nip Hmp	1.01587	6.32767	24.9808	4.15598	2.53473	0.337259
B006	indica	Changsha	×Nip Hmp	NA	NA	NA	NA	NA	NA
B007	indica	Changsha	×Nip Hmp	4.72353	16.502	92.3308	1.75901	8.68022	1.12522
B008	japonica	Changsha	×Nip Hmp	-0.117803	6.63982	2.31829	3.61204	NA	NA
B009	indica	Changsha	×Nip Hmp	-2.98413	-10.0723	-39.4192	3.32037	17.1524	1.54652
B010	indica	Changsha	×Nip Hmp	4.21587	8.82767	69.2808	8.68098	NA	0.448925
B011	indica	Changsha	×Nip Hmp	3.1072	22.4148	96.0558	12.9893	NA	NA
B012	indica	Changsha	×Nip Hmp	NA	NA	NA	NA	NA	NA
B013	indica	Changsha	×Nip Hmp	3.22353	11.802	58.6308	-0.55463	12.3174	0.711519
B014	japonica	Changsha	×Nip Hmp	-0.0303026	-0.235183	-0.544207	4.55068	19.5644	0.224389
B015	indica	Changsha	×Nip Hmp	3.41587	21.6277	113.381	14.3226	28.2114	0.263925
B016	japonica	Changsha	×Nip Hmp	1.7697	10.7148	43.5558	4.50901	10.2786	-0.151445
B017	japonica	Changsha	×Nip Hmp	0.115865	10.6277	38.2808	5.82265	13.8281	0.113925
B018	japonica	Changsha	×Nip Hmp	1.84886	23.8565	70.6266	-0.532657	14.1977	-0.109778
B019	indica	Changsha	×Nip Hmp	-2.78413	-11.2723	-49.1692	NA	NA	NA
B020	indica	Changsha	×Nip Hmp	2.1197	26.6648	136.406	3.2787	62.0374	0.634852
B021	indica	Changsha	×Nip Hmp	NA	NA	NA	10.259	NA	NA
B023	japonica	Changsha	×Nip Hmp	NA	NA	NA	NA	NA	NA
B024	indica	Changsha	×Nip Hmp	2.4697	19.2648	87.5058	NA	NA	NA
B025	japonica	Changsha	×Nip Hmp	3.0697	20.6648	100.206	1.13401	26.2752	0.935222
B026	indica	Changsha	×Nip Hmp	3.42353	1.97696	16.9808	NA	NA	NA
B027	indica	Changsha	×Nip Hmp	-1.1303	-3.03518	13.1308	5.15598	NA	NA
B028	indica	Changsha	×Nip Hmp	2.6697	12.5648	63.1058	11.3423	3.19189	0.150222
B029	indica	Changsha	×Nip Hmp	2.0197	15.2148	66.3558	7.28098	23.8643	0.617259
B030	indica	Changsha	×Nip Hmp	0.415865	-15.2723	-65.3192	-1.84402	NA	NA
B031	indica	Changsha	×Nip Hmp	NA	NA	NA	NA	NA	NA
B032	indica	Changsha	×Nip Hmp	3.6197	20.2648	90.3058	NA	NA	NA
B033	indica	Changsha	×Nip Hmp	2.11587	10.0277	51.0808	NA	NA	NA
B034	japonica	Changsha	×Nip Hmp	2.79087	9.10267	51.5308	4.65598	16.4797	-0.314408
B035	indica	Changsha	×Nip Hmp	1.01587	16.0277	69.3808	5.82265	24.7797	0.160592
B036	japonica	Changsha	×Nip Hmp	2.62803	23.4898	83.2141	4.61204	54.5324	-0.0751481
B037	japonica	Changsha	×Nip Hmp	0.819697	4.96482	29.3558	-0.137963	6.08739	-0.0468148
B038	japonica	Changsha	×Nip Hmp	0.719697	6.81482	17.2558	NA	NA	NA
B039	indica	Changsha	×Nip Hmp	1.41587	15.2277	66.7558	8.65598	26.2247	1.18559
B040	indica	Changsha	×Nip Hmp	3.2197	14.8148	72.0558	NA	NA	NA
B043	japonica	Changsha	×Nip Hmp	-3.08413	-14.3723	-79.0192	12.656	13.8981	-0.197741
B044	indica	Changsha	×Nip Hmp	NA	NA	NA	NA	NA	NA
B045	japonica	Changsha	×Nip Hmp	-0.530303	0.664817	-6.09421	1.17568	8.54981	0.334389
B046	japonica	Changsha	×Nip Hmp	-1.0303	-6.18518	-25.7942	2.65598	14.3947	0.557259
B047	japonica	Changsha	×Nip Hmp	0.369697	-1.93518	-1.39421	1.73704	-7.74761	-0.335148
B048	indica	Changsha	×Nip Hmp	1.2197	7.51482	36.0558	5.2787	11.4674	-0.423481
B049	indica	Changsha	×Nip Hmp	2.92353	14.502	75.8308	3.44537	21.0974	0.594852
B051	indica	Changsha	×Nip Hmp	3.3447	0.789817	28.3808	-3.11599	-5.24894	0.108555
B052	indica	Changsha	×Nip Hmp	4.32353	28.402	137.731	5.44537	58.8674	0.269852
B053	japonica	Changsha	×Nip Hmp	NA	NA	NA	NA	NA	NA
B054	japonica	Changsha	×Nip Hmp	NA	NA	NA	NA	NA	NA
B055	japonica	Changsha	×Nip Hmp	1.1697	5.66482	33.4058	3.86204	3.05239	0.281519
B056	japonica	Changsha	×Nip Hmp	6.33636	41.1315	201.556	NA	NA	NA
B057	japonica	Changsha	×Nip Hmp	NA	NA	NA	NA	NA	NA
B058	indica	Changsha	×Nip Hmp	5.61587	19.6277	116.081	11.6757	50.0763	0.832722
B059	indica	Changsha	×Nip Hmp	3.40303	18.6315	95.1725	-2.2213	28.1574	0.621519
B060	indica	Changsha	×Nip Hmp	3.11587	17.8277	86.0808	-1.30235	12.1997	0.850592
B061	indica	Changsha	×Nip Hmp	NA	NA	NA	NA	NA	NA
B062	indica	Changsha	×Nip Hmp	2.2697	7.31482	39.5558	2.94651	23.4801	0.556889
B063	indica	Changsha	×Nip Hmp	NA	NA	NA	NA	NA	NA
B064	indica	Changsha	×Nip Hmp	4.92353	34.302	155.931	1.73704	27.8274	0.471519
B065	indica	Changsha	×Nip Hmp	3.7197	24.2648	90.7058	4.13401	20.1452	0.0189254
B066	japonica	Changsha	×Nip Hmp	3.39053	20.244	85.1058	-1.51068	13.1297	0.783925
B067	indica	Changsha	×Nip Hmp	1.7697	7.96482	36.5058	2.98818	3.3196	0.878555
B068	japonica	Changsha	×Nip Hmp	1.71587	4.02767	14.8808	-2.28266	5.49189	1.12856
B069	japonica	Changsha	×Nip Hmp	0.269697	5.21482	19.2058	3.5287	11.6124	-1.13681
B070	japonica	Changsha	×Nip Hmp	-0.184135	10.0277	34.4808	NA	NA	NA
B071	japonica	Changsha	×Nip Hmp	0.132532	5.68601	32.0392	-3.84402	-11.0353	0.00392544
B072	indica	Changsha	×Nip Hmp	NA	NA	NA	NA	NA	NA
B073	indica	Changsha	×Nip Hmp	NA	NA	NA	NA	NA	NA
B074	indica	Changsha	×Nip Hmp	3.2197	18.7148	92.2058	6.67568	18.299	0.556889
B075	indica	Changsha	×Nip Hmp	-0.784135	8.45267	25.4308	5.40598	-11.5636	0.292259
B076	indica	Changsha	×Nip Hmp	NA	NA	NA	NA	NA	NA
B077	japonica	Changsha	×Nip Hmp	NA	NA	NA	NA	NA	NA
B079	indica	Changsha	×Nip Hmp	2.7697	16.4648	64.6058	5.94537	8.15739	0.379852
B081	indica	Changsha	×Nip Hmp	1.9197	14.3148	60.4058	-1.78266	-7.35124	-0.170611
B082	indica	Changsha	×Nip Hmp	1.71587	10.5277	36.6808	NA	NA	NA
B083	indica	Changsha	×Nip Hmp	NA	NA	NA	NA	NA	NA
B084	japonica	Changsha	×Nip Hmp	1.8197	3.26482	26.6558	3.82265	2.80473	0.355592
B085	indica	Changsha	×Nip Hmp	3.8197	14.7148	75.5558	8.98932	25.7697	0.527259
B086	japonica	Changsha	×Nip Hmp	3.2197	38.6648	183.906	4.65598	51.7831	-0.466075
B087	indica	Changsha	×Nip Hmp	1.91136	-6.27685	-5.65254	2.94537	-27.9726	-0.578481
B088	indica	Changsha	×Nip Hmp	NA	NA	NA	NA	NA	NA
B089	indica	Changsha	×Nip Hmp	3.8447	31.3898	128.781	9.15598	NA	NA
B090	indica	Changsha	×Nip Hmp	1.6697	7.33982	31.2808	4.32265	NA	NA
B091	indica	Changsha	×Nip Hmp	1.9447	18.9648	74.4558	6.11204	9.16239	0.568185
B092	indica	Changsha	×Nip Hmp	2.5197	9.66482	52.5058	-0.532657	-11.1314	1.03272
B093	indica	Changsha	×Nip Hmp	1.71587	5.22767	35.5808	-0.344017	3.96473	0.875592
B094	indica	Changsha	×Nip Hmp	0.469697	-5.28518	-18.8442	-3.69932	-13.8773	0.022722
B095	indica	Changsha	×Nip Hmp	1.38253	15.2943	57.1808	5.48932	33.5239	0.105592
B096	indica	Changsha	×Nip Hmp	NA	NA	NA	NA	NA	NA
B097	indica	Changsha	×Nip Hmp	2.2197	15.9148	74.5058	4.00901	11.3219	-0.0306114
B100	japonica	Changsha	×Nip Hmp	1.5492	-3.02233	36.2475	-1.38796	-4.42761	-1.97848
B101	japonica	Changsha	×Nip Hmp	1.8947	6.81482	26.7808	14.656	18.0931	-0.407741
B102	japonica	Changsha	×Nip Hmp	-0.0303026	3.26482	10.9558	-1.26296	6.45239	-0.161815
B103	japonica	Changsha	×Nip Hmp	2.51587	7.52767	39.7808	1.55068	29.1869	0.639389
B104	indica	Changsha	×Nip Hmp	2.5197	17.9648	65.1058	NA	NA	NA
B105	indica	Changsha	×Nip Hmp	1.41587	1.32767	17.3808	NA	NA	NA
B106	indica	Changsha	×Nip Hmp	1.83636	6.35648	42.4225	5.98704	NA	NA
B107	indica	Changsha	×Nip Hmp	0.457197	12.3273	102.281	5.94537	NA	NA
B108	indica	Changsha	×Nip Hmp	NA	NA	NA	NA	NA	NA
B109	japonica	Changsha	×Nip Hmp	1.7197	9.76482	48.0058	1.36204	18.0774	1.40652
B110	japonica	Changsha	×Nip Hmp	1.21587	6.42767	22.7808	-2.34402	0.146393	-0.186075
B111	japonica	Changsha	×Nip Hmp	NA	NA	NA	NA	NA	NA
B112	indica	Changsha	×Nip Hmp	-0.813636	-12.1352	-36.2442	-8.38796	-20.7776	-0.0824815
B113	indica	Changsha	×Nip Hmp	2.0197	14.8148	78.7808	NA	NA	NA
B114	indica	Changsha	×Nip Hmp	1.5197	13.9148	59.2058	NA	NA	NA
B115	indica	Changsha	×Nip Hmp	2.6697	17.2648	82.8058	10.4454	47.0124	0.911519
B116	indica	Changsha	×Nip Hmp	3.1447	17.5273	79.4808	8.73932	-1.32319	0.672259
B117	japonica	Changsha	×Nip Hmp	1.42803	6.13982	36.4058	1.96734	12.9336	-0.032278
B118	indica	Changsha	×Nip Hmp	1.20303	17.3315	65.8891	NA	NA	NA
B119	indica	Changsha	×Nip Hmp	3.1697	17.9148	96.5558	3.21734	-7.93832	0.692722
B120	indica	Changsha	×Nip Hmp	2.6697	15.9148	82.2058	8.71734	41.6048	0.010222
B121	indica	Changsha	×Nip Hmp	3.4197	30.7648	106.656	-3.38796	-0.992614	-0.0168148
B122	japonica	Changsha	×Nip Hmp	1.1697	3.56482	18.8558	6.23818	20.2886	-0.216445
B123	indica	Changsha	×Nip Hmp	3.28636	12.4982	82.6391	0.842343	1.06293	-0.384778
B124	japonica	Changsha	×Nip Hmp	0.619697	9.66482	46.1808	0.0506766	7.61272	0.273555
B125	indica	Changsha	×Nip Hmp	3.0697	8.61482	49.0058	8.46734	10.9094	0.0948053
B126	indica	Changsha	×Nip Hmp	4.6697	31.4648	153.906	1.71734	39.6227	0.728555
B127	indica	Changsha	×Nip Hmp	2.41587	11.1277	53.6808	3.15598	16.6514	-0.0510746
B128	indica	Changsha	×Nip Hmp	NA	NA	NA	NA	NA	NA
B129	indica	Changsha	×Nip Hmp	0.623529	15.0353	55.1974	NA	NA	NA
B130	indica	Changsha	×Nip Hmp	NA	NA	NA	NA	NA	NA
B131	indica	Changsha	×Nip Hmp	2.80303	24.5482	114.389	-5.09402	9.18223	1.22559
B132	indica	Changsha	×Nip Hmp	1.91587	12.461	14.4142	14.8226	17.0897	0.847259
B133	indica	Changsha	×Nip Hmp	NA	NA	NA	NA	NA	NA
B134	japonica	Changsha	×Nip Hmp	3.2822	12.7773	63.8808	NA	NA	NA
B135	indica	Changsha	×Nip Hmp	1.4197	6.07732	37.3308	NA	NA	NA
B136	japonica	Changsha	×Nip Hmp	0.665865	0.127673	16.5808	NA	NA	NA
B137	indica	Changsha	×Nip Hmp	4.92353	19.202	112.731	NA	NA	NA
B138	indica	Changsha	×Nip Hmp	1.6697	5.28148	31.2391	2.21734	28.4297	0.420592
B139	indica	Changsha	×Nip Hmp	3.8697	27.7315	111.656	7.65598	11.4531	1.33226
B140	indica	Changsha	×Nip Hmp	2.61587	24.4277	95.8808	9.65598	37.2981	0.985592
B141	indica	Changsha	×Nip Hmp	0.369697	3.81482	9.55579	-3.15766	-4.98603	1.38106
B142	japonica	Changsha	×Nip Hmp	-0.430303	-0.0851831	-5.49421	4.98932	25.9981	0.583925
B143	japonica	Changsha	×Nip Hmp	1.25303	9.99815	52.1558	1.71734	32.2211	0.363555
B144	japonica	Changsha	×Nip Hmp	1.1197	19.2148	81.5558	-0.199323	12.5686	-0.220611
B145	indica	Changsha	×Nip Hmp	NA	NA	NA	NA	NA	NA
B146	indica	Changsha	×Nip Hmp	2.2197	14.5148	68.8058	NA	NA	NA
B147	indica	Changsha	×Nip Hmp	NA	NA	NA	-2.42963	1.96739	0.269852
B148	japonica	Changsha	×Nip Hmp	2.75686	40.6686	165.697	4.98932	NA	NA
B149	indica	Changsha	×Nip Hmp	2.42353	8.93529	72.2308	-2.13796	-9.99761	-0.435148
B150	indica	Changsha	×Nip Hmp	5.3197	20.0398	116.381	10.2798	20.5698	-0.350611
B151	indica	Changsha	×Nip Hmp	3.3697	9.86482	62.2058	2.42568	3.24918	-0.319778
B152	japonica	Changsha	×Nip Hmp	-0.0969693	0.614817	6.33913	2.46734	9.48356	0.398555
B153	indica	Changsha	×Nip Hmp	6.18636	28.2648	134.056	-4.51068	0.462226	0.927259
B154	japonica	Changsha	×Nip Hmp	0.919697	0.864817	9.70579	1.80068	1.93022	-0.194778
B155	indica	Changsha	×Nip Hmp	3.1197	4.06482	40.8558	3.46734	-0.555611	-0.875611
B156	indica	Changsha	×Nip Hmp	3.0697	15.9148	67.4058	0.279843	6.80751	0.921852
B157	indica	Changsha	×Nip Hmp	3.8697	18.5648	106.806	5.09234	40.8727	0.470222
B158	indica	Changsha	×Nip Hmp	0.715865	4.42767	21.1808	-1.34402	-5.82861	-0.122741
B159	indica	Changsha	×Nip Hmp	NA	NA	NA	NA	NA	NA
B160	japonica	Changsha	×Nip Hmp	NA	NA	NA	NA	NA	NA
B161	japonica	Changsha	×Nip Hmp	3.11587	NA	NA	NA	NA	NA
B162	japonica	Changsha	×Nip Hmp	1.61587	17.5277	52.9808	1.82265	10.3964	-0.397741
B163	indica	Changsha	×Nip Hmp	0.915865	6.52767	33.1808	-1.86599	-4.1304	0.879389
B164	indica	Changsha	×Nip Hmp	8.32353	31.102	175.281	2.63401	6.72356	0.560222
B165	indica	Changsha	×Nip Hmp	2.88253	2.42767	30.1308	NA	NA	NA
B166	japonica	Changsha	×Nip Hmp	1.6197	9.65232	36.4058	3.38401	10.5229	0.0885553
B167	japonica	Changsha	×Nip Hmp	NA	NA	NA	NA	NA	NA
B168	japonica	Changsha	×Nip Hmp	1.4197	9.48982	8.90579	-1.36599	-1.73811	-0.650611
B169	japonica	Changsha	×Nip Hmp	-0.480303	0.714817	2.75579	1.73704	7.32739	0.794852
B170	japonica	Changsha	×Nip Hmp	-0.680303	2.86482	6.15579	6.46734	21.1094	0.241889
B171	japonica	Changsha	×Nip Hmp	1.71587	0.827673	8.68082	NA	NA	NA
B173	indica	Changsha	×Nip Hmp	1.71587	10.7277	-18.8192	3.48932	NA	NA
B176	indica	Changsha	×Nip Hmp	2.7197	17.6898	53.0308	NA	NA	NA
B179	japonica	Changsha	×Nip Hmp	NA	NA	NA	NA	NA	NA
B180	indica	Changsha	×Nip Hmp	1.2697	1.76482	11.8058	7.48932	29.1397	0.508925
B181	indica	Changsha	×Nip Hmp	2.9697	13.4148	68.6558	4.94537	-4.10761	0.463185
B182	japonica	Changsha	×Nip Hmp	-2.5303	-4.68518	-30.1442	0.00900997	-4.80186	0.206055
B183	japonica	Changsha	×Nip Hmp	0.169697	3.01482	13.6058	0.38401	-0.177277	-0.463111
B184	indica	Changsha	×Nip Hmp	6.47353	21.727	122.531	9.38401	17.1561	0.470222
B185	indica	Changsha	×Nip Hmp	2.0902	27.102	101.397	NA	NA	NA
B187	indica	Changsha	×Nip Hmp	1.42353	5.75196	32.7808	-5.88796	-19.0126	-0.0751481
B188	japonica	Changsha	×Nip Hmp	3.7447	27.8398	122.818	5.65598	38.5914	0.617259
B189	japonica	Changsha	×Nip Hmp	4.12353	16.902	85.5308	6.11204	2.41739	-0.413481
B190	japonica	Changsha	×Nip Hmp	NA	NA	NA	NA	NA	NA
B191	japonica	Changsha	×Nip Hmp	1.13636	-4.46852	-22.7942	0.862037	-2.09261	1.84152
B192	indica	Changsha	×Nip Hmp	NA	NA	NA	NA	NA	NA
B193	indica	Changsha	×Nip Hmp	2.32353	18.902	78.8308	-3.2213	7.93239	-0.413481
B194	indica	Changsha	×Nip Hmp	1.61587	14.1277	53.9808	11.656	20.3214	0.258925
B195	indica	Changsha	×Nip Hmp	1.91587	21.0277	93.1808	-3.34402	13.9764	NA
B196	japonica	Changsha	×Nip Hmp	-0.480303	4.11482	12.9558	1.98818	20.1377	-0.249778
B197	indica	Changsha	×Nip Hmp	NA	NA	NA	NA	NA	NA
B198	indica	Changsha	×Nip Hmp	2.81587	18.6277	94.5808	7.90598	35.6964	1.54059
B199	japonica	Changsha	×Nip Hmp	-3.28413	NA	-96.2192	NA	NA	NA
B200	indica	Changsha	×Nip Hmp	2.3197	14.4148	68.7558	3.7787	10.6974	0.741519
B201	indica	Changsha	×Nip Hmp	3.01587	5.32767	13.8808	9.82265	18.8997	NA
B202	indica	Changsha	×Nip Hmp	1.91587	0.527673	2.38082	0.989316	-0.658607	0.402259
B203	indica	Changsha	×Nip Hmp	3.9447	16.1023	66.6058	NA	NA	NA
B204	japonica	Changsha	×Nip Hmp	0.719697	1.61482	8.75579	3.11204	15.3474	0.468555
B205	japonica	Changsha	×Nip Hmp	NA	NA	NA	NA	NA	NA
B207	indica	Changsha	×Nip Hmp	1.8197	13.5648	57.8058	4.7787	18.4224	0.683185
B208	indica	Changsha	×Nip Hmp	NA	NA	NA	NA	NA	NA
B210	indica	Changsha	×Nip Hmp	2.7697	15.6148	73.0058	3.38401	11.8981	0.308555
B212	japonica	Changsha	×Nip Hmp	3.38636	10.0482	46.1891	2.17568	0.0860561	0.433925
B213	indica	Changsha	×Nip Hmp	NA	NA	NA	NA	NA	NA
B214	indica	Changsha	×Nip Hmp	2.4697	16.8148	62.2558	0.07151	4.45106	1.08559
B215	japonica	Changsha	×Nip Hmp	3.2697	13.2648	68.3308	NA	NA	NA
B216	indica	Changsha	×Nip Hmp	4.36587	5.72767	0.730818	-7.30235	NA	NA
B217	indica	Changsha	×Nip Hmp	2.1697	6.93982	55.1558	0.528704	-13.6576	0.504852
B218	japonica	Changsha	×Nip Hmp	1.6697	3.06482	13.0058	1.21734	2.50522	0.375222
B219	indica	Changsha	×Nip Hmp	3.38636	13.2315	66.5225	NA	NA	NA
B221	indica	Changsha	×Nip Hmp	-0.955303	1.96482	30.5058	-9.28266	-17.2473	-1.35761
B222	indica	Changsha	×Nip Hmp	2.45686	17.902	81.2308	4.61204	12.0374	-0.0101481
B223	japonica	Changsha	×Nip Hmp	1.55303	14.3648	32.7725	0.13401	4.31856	0.272722
B224	indica	Changsha	×Nip Hmp	0.315865	-2.47233	-10.6192	5.15598	-3.48361	0.377259
B225	japonica	Changsha	×Nip Hmp	-2.88413	-15.3723	-58.0192	NA	NA	NA
B226	japonica	Changsha	×Nip Hmp	NA	NA	NA	NA	NA	NA
B227	indica	Changsha	×Nip Hmp	3.43636	23.2815	99.6058	1.42568	3.78814	0.717722
B228	japonica	Changsha	×Nip Hmp	2.46587	2.82767	7.88082	2.15598	7.37973	0.00225877
B229	indica	Changsha	×Nip Hmp	-0.363636	-9.76018	-41.5525	-2.88796	-29.5076	-0.945148
B230	japonica	Changsha	×Nip Hmp	2.6697	19.7148	86.4558	1.96734	18.7452	0.716055
B231	indica	Changsha	×Nip Hmp	2.1197	-2.06018	15.1058	0.778704	2.70739	0.0848519
B232	indica	Changsha	×Nip Hmp	2.2697	12.8148	72.0558	2.21734	23.8481	0.592722
B233	indica	Changsha	×Nip Hmp	2.0197	4.26482	28.0308	6.38401	-11.8648	-0.258945
B234	indica	Changsha	×Nip Hmp	1.3197	-1.23518	-9.29421	0.38401	-5.10644	-0.0681114
B235	japonica	Changsha	×Nip Hmp	0.719697	-0.335183	-2.34421	0.550677	5.53606	-0.233111
B236	japonica	Changsha	×Nip Hmp	-1.0303	-1.03518	-5.24421	-0.0951567	5.23606	0.537722
B238	indica	Changsha	×Nip Hmp	2.0697	7.51482	25.9558	NA	NA	NA
B239	indica	Changsha	×Nip Hmp	2.3197	14.1148	81.0558	2.2787	1.09739	-0.260148
B240	japonica	Changsha	×Nip Hmp	NA	NA	NA	3.94537	37.0724	-0.356815
B241	japonica	Changsha	×Nip Hmp	2.32353	14.502	64.0308	1.2787	28.0924	1.02652
B242	indica	Changsha	×Nip Hmp	4.41587	28.9277	139.581	8.48932	23.0564	0.263925
B243	indica	Changsha	×Nip Hmp	0.523529	-12.698	-40.5692	NA	NA	NA
B244	indica	Changsha	×Nip Hmp	1.1697	12.8648	51.0558	NA	NA	NA
B245	japonica	Changsha	×Nip Hmp	3.21587	12.6277	67.1808	NA	NA	NA
B246	indica	Changsha	×Nip Hmp	1.7697	10.6648	47.5058	1.44537	-18.0826	0.199852
B247	indica	Changsha	×Nip Hmp	4.0197	6.96482	56.4558	-5.03266	-10.4581	-0.431945
B248	indica	Changsha	×Nip Hmp	4.92353	21.002	112.531	3.94537	21.5924	1.20819
B249	indica	Changsha	×Nip Hmp	4.80303	22.6315	115.456	-1.36599	3.28064	0.760222
B250	japonica	Changsha	×Nip Hmp	4.7697	18.9648	103.656	4.46734	7.59564	-0.101445
B252	indica	Changsha	×Nip Hmp	5.51587	30.2277	145.481	6.82265	44.8597	-0.0194079
B253	indica	Changsha	×Nip Hmp	3.21587	25.3277	132.281	NA	NA	NA
B254	indica	Changsha	×Nip Hmp	2.31587	27.3277	131.881	NA	NA	NA
B255	indica	Changsha	×Nip Hmp	4.13636	26.7982	124.239	6.50901	19.1611	0.951139
B258	japonica	Changsha	×Nip Hmp	NA	NA	NA	NA	NA	NA
B259	indica	Changsha	×Nip Hmp	2.61587	15.3277	57.7808	-3.32432	-7.99061	0.763555
B260	indica	Changsha	×Nip Hmp	0.665865	-6.32233	-3.11918	2.21734	-15.0539	0.131055
B261	indica	Changsha	×Nip Hmp	NA	NA	NA	NA	NA	NA
B263	japonica	Changsha	×Nip Hmp	1.51587	8.62767	33.9808	-2.21902	2.12389	0.483925
B264	indica	Changsha	×Nip Hmp	3.01587	19.9277	84.0808	NA	NA	NA
B265	indica	Changsha	×Nip Hmp	0.540865	10.1027	25.2808	NA	NA	NA
B266	japonica	Changsha	×Nip Hmp	1.30303	-2.08518	-4.21087	1.15598	0.906393	0.218925
B268	indica	Changsha	×Nip Hmp	0.115865	-13.9723	-44.5192	NA	NA	0.168925
B269	japonica	Changsha	×Nip Hmp	0.0158654	6.12767	22.7808	1.82265	14.0047	0.755592
YB10_1	japonica	Changsha	×Nip Hmp	NA	NA	NA	5.48932	NA	NA
YB11_1	japonica	Changsha	×Nip Hmp	3.62353	15.177	88.5308	NA	NA	NA
YB12_1	japonica	Changsha	×Nip Hmp	3.43636	16.9815	76.0725	3.92568	0.794181	-1.53894
YB14_1	japonica	Changsha	×Nip Hmp	2.3197	28.2148	87.9558	NA	NA	NA
YB15_1	indica	Changsha	×Nip Hmp	3.5697	14.5315	85.0891	3.86204	10.1474	0.338185
YB16_1	indica	Changsha	×Nip Hmp	NA	NA	NA	NA	NA	NA
YB17_1	japonica	Changsha	×Nip Hmp	4.0697	13.0898	66.0058	-7.01068	5.22306	0.170592
YB18_1	indica	Changsha	×Nip Hmp	1.90303	-3.90185	3.67246	NA	NA	NA
YB19_1	japonica	Changsha	×Nip Hmp	4.21587	30.3277	136.781	NA	NA	NA
YB1_1	japonica	Changsha	×Nip Hmp	1.1697	6.51482	30.0558	1.71734	22.7427	0.042722
YB20_1	japonica	Changsha	×Nip Hmp	2.32353	26.302	124.031	-4.05463	21.4874	0.759852
YB22_1	japonica	Changsha	×Nip Hmp	1.01587	15.2277	53.3808	-1.01068	29.3972	NA
YB24_1	japonica	Changsha	×Nip Hmp	2.9197	9.61482	29.0558	2.44537	14.5674	-0.136815
YB2_1	japonica	Changsha	×Nip Hmp	1.5697	4.56482	27.9558	0.905983	-2.82444	0.420592
YB4_1	indica	Changsha	×Nip Hmp	1.4197	3.51482	29.7558	3.42568	6.09689	-0.215611
YB5_1	indica	Changsha	×Nip Hmp	3.0947	13.2648	73.1058	10.612	26.5424	-0.0934815
YB6_1	japonica	Changsha	×Nip Hmp	NA	NA	NA	NA	NA	NA
YB7_1	japonica	Changsha	×Nip Hmp	1.3697	8.11482	36.2058	4.11204	19.6524	0.471519
YB8_1	japonica	Changsha	×Nip Hmp	0.515865	10.8277	41.8808	-0.510684	-9.76527	-0.414408
YB9_1	indica	Changsha	×Nip Hmp	NA	NA	NA	-0.17735	NA	NA
9311	indica	Changsha	×9311 Hmp	NA	NA	NA	NA	NA	NA
Nipponbare	japonica	Changsha	×9311 Hmp	1.89951	-7.15106	5.80428	-0.638525	-18.0965	-1.91231
B001	japonica	Changsha	×9311 Hmp	NA	NA	NA	NA	NA	NA
B002	japonica	Changsha	×9311 Hmp	2.45179	10.6784	61.3679	NA	NA	NA
B003	japonica	Changsha	×9311 Hmp	2.77598	24.4136	115.34	4.49944	32.9111	-0.535499
B004	japonica	Changsha	×9311 Hmp	2.87598	17.9636	92.2152	4.3652	40.5105	0.165253
B005	japonica	Changsha	×9311 Hmp	2.80098	19.8636	88.3402	4.78186	21.2255	0.700253
B006	indica	Changsha	×9311 Hmp	NA	NA	NA	NA	NA	NA
B007	indica	Changsha	×9311 Hmp	NA	NA	NA	NA	NA	NA
B008	japonica	Changsha	×9311 Hmp	-1.24902	2.71364	-30.4348	5.34201	NA	NA
B009	indica	Changsha	×9311 Hmp	NA	NA	NA	NA	NA	NA
B010	indica	Changsha	×9311 Hmp	1.20098	4.28864	40.1902	2.12444	-15.1601	-0.287165
B011	indica	Changsha	×9311 Hmp	0.901786	14.6784	29.9179	3.50868	-10.5965	NA
B012	indica	Changsha	×9311 Hmp	NA	NA	NA	5.74944	NA	NA
B013	indica	Changsha	×9311 Hmp	NA	NA	NA	NA	NA	NA
B014	japonica	Changsha	×9311 Hmp	NA	NA	NA	NA	NA	NA
B015	indica	Changsha	×9311 Hmp	0.809317	8.11364	28.2068	7.82353	32.8605	0.0669192
B016	japonica	Changsha	×9311 Hmp	1.35179	11.0284	69.2679	14.842	19.6768	0.517083
B017	japonica	Changsha	×9311 Hmp	3.77598	36.7136	172.54	1.1661	5.99446	-0.248832
B018	japonica	Changsha	×9311 Hmp	2.14265	20.4803	67.1902	8.32353	NA	NA
B019	indica	Changsha	×9311 Hmp	NA	NA	NA	7.09201	59.5551	1.72542
B020	indica	Changsha	×9311 Hmp	4.40179	28.2284	82.4679	0.342014	2.75847	-0.962917
B021	indica	Changsha	×9311 Hmp	NA	NA	NA	NA	NA	NA
B023	japonica	Changsha	×9311 Hmp	2.74265	23.8803	106.074	10.0828	21.9128	0.421168
B024	indica	Changsha	×9311 Hmp	1.17598	12.5136	63.2402	NA	NA	NA
B025	japonica	Changsha	×9311 Hmp	-2.62402	-4.98636	120.268	2.50868	20.1285	1.29708
B026	indica	Changsha	×9311 Hmp	-0.274017	13.6386	68.3902	9.59201	43.4943	-0.13625
B027	indica	Changsha	×9311 Hmp	1.97598	6.61364	42.3402	1.74944	45.7578	0.206168
B028	indica	Changsha	×9311 Hmp	-0.149017	4.36364	30.8652	6.83277	23.4845	-0.613832
B029	indica	Changsha	×9311 Hmp	-0.0982143	14.0284	29.7679	-4.91723	9.90446	0.169501
B030	indica	Changsha	×9311 Hmp	NA	NA	NA	NA	NA	NA
B031	indica	Changsha	×9311 Hmp	NA	NA	NA	-2.75056	NA	NA
B032	indica	Changsha	×9311 Hmp	0.550181	3.69891	30.2625	6.49944	16.9105	NA
B033	indica	Changsha	×9311 Hmp	1.27598	11.3136	52.9402	-0.250562	23.4595	NA
B034	japonica	Changsha	×9311 Hmp	NA	NA	NA	NA	NA	NA
B035	indica	Changsha	×9311 Hmp	NA	NA	NA	NA	NA	NA
B036	japonica	Changsha	×9311 Hmp	2.27598	18.1636	91.7652	7.74944	51.5136	-0.257165
B037	japonica	Changsha	×9311 Hmp	0.175983	2.11364	18.8402	9.24944	31.0011	0.886168
B038	japonica	Changsha	×9311 Hmp	NA	NA	NA	NA	NA	NA
B039	indica	Changsha	×9311 Hmp	0.475983	5.91364	16.1402	9.33277	13.6761	0.242835
B040	indica	Changsha	×9311 Hmp	1.07598	11.3136	39.6402	2.42535	21.3248	0.355417
B043	japonica	Changsha	×9311 Hmp	-0.824017	10.8136	56.3402	7.58277	36.3695	1.4245
B044	indica	Changsha	×9311 Hmp	0.875983	15.4136	92.7402	6.20777	54.6195	1.87617
B045	japonica	Changsha	×9311 Hmp	NA	NA	NA	NA	NA	NA
B046	japonica	Changsha	×9311 Hmp	-2.82402	-10.2864	-42.8598	7.99944	2.93113	-0.488832
B047	japonica	Changsha	×9311 Hmp	NA	NA	NA	NA	NA	NA
B048	indica	Changsha	×9311 Hmp	2.17598	15.3136	61.1402	2.24944	23.3161	0.164501
B049	indica	Changsha	×9311 Hmp	0.501786	20.9284	79.6679	2.84201	36.3451	0.0104167
B051	indica	Changsha	×9311 Hmp	NA	NA	NA	NA	NA	NA
B052	indica	Changsha	×9311 Hmp	-0.124017	17.7136	77.4402	4.08277	20.4845	-0.313832
B053	japonica	Changsha	×9311 Hmp	0.875983	10.7136	55.4402	4.4161	5.44946	0.249501
B054	japonica	Changsha	×9311 Hmp	0.775983	4.48031	32.4068	8.83277	35.2678	1.17283
B055	japonica	Changsha	×9311 Hmp	-0.424017	6.81364	40.0402	0.582772	14.7811	0.654501
B056	japonica	Changsha	×9311 Hmp	-1.22402	4.41364	58.4679	NA	NA	NA
B057	japonica	Changsha	×9311 Hmp	0.901786	8.42837	NA	NA	NA	NA
B058	indica	Changsha	×9311 Hmp	NA	NA	NA	NA	NA	NA
B059	indica	Changsha	×9311 Hmp	1.03512	-5.87163	1.83452	NA	NA	NA
B060	indica	Changsha	×9311 Hmp	NA	NA	NA	NA	NA	NA
B061	indica	Changsha	×9311 Hmp	NA	NA	NA	NA	NA	NA
B062	indica	Changsha	×9311 Hmp	2.40179	28.2284	123.068	8.55035	54.4635	0.06875
B063	indica	Changsha	×9311 Hmp	0.34265	5.81364	42.8735	0.916105	14.2428	-0.390499
B064	indica	Changsha	×9311 Hmp	NA	NA	NA	NA	NA	NA
B065	indica	Changsha	×9311 Hmp	1.37598	6.51364	41.5402	1.4161	8.46779	0.462835
B066	japonica	Changsha	×9311 Hmp	NA	NA	NA	NA	NA	NA
B067	indica	Changsha	×9311 Hmp	NA	NA	NA	NA	NA	NA
B068	japonica	Changsha	×9311 Hmp	1.37598	7.23864	30.8902	-3.41723	-12.0305	0.197835
B069	japonica	Changsha	×9311 Hmp	NA	NA	NA	NA	NA	NA
B070	japonica	Changsha	×9311 Hmp	NA	NA	NA	NA	NA	NA
B071	japonica	Changsha	×9311 Hmp	NA	NA	NA	NA	NA	NA
B072	indica	Changsha	×9311 Hmp	NA	NA	NA	NA	NA	NA
B073	indica	Changsha	×9311 Hmp	NA	NA	NA	NA	NA	NA
B074	indica	Changsha	×9311 Hmp	4.08351	38.9656	191.312	9.74944	78.4405	0.305253
B075	indica	Changsha	×9311 Hmp	NA	NA	NA	NA	NA	NA
B076	indica	Changsha	×9311 Hmp	NA	NA	NA	NA	NA	NA
B077	japonica	Changsha	×9311 Hmp	0.450983	3.13864	21.0152	1.34201	5.41013	-1.15458
B079	indica	Changsha	×9311 Hmp	0.975983	10.6136	65.1402	4.99944	42.1778	0.212835
B081	indica	Changsha	×9311 Hmp	0.675983	12.3136	57.6402	2.08277	25.2378	-0.305499
B082	indica	Changsha	×9311 Hmp	2.57598	19.6136	56.7402	NA	NA	NA
B083	indica	Changsha	×9311 Hmp	NA	NA	NA	NA	NA	NA
B084	japonica	Changsha	×9311 Hmp	1.70179	15.6784	61.9679	NA	NA	NA
B085	indica	Changsha	×9311 Hmp	1.65098	-2.26136	4.96518	NA	NA	NA
B086	japonica	Changsha	×9311 Hmp	1.30179	22.2284	102.968	NA	NA	NA
B087	indica	Changsha	×9311 Hmp	NA	NA	NA	NA	NA	NA
B088	indica	Changsha	×9311 Hmp	NA	NA	NA	NA	NA	NA
B089	indica	Changsha	×9311 Hmp	NA	NA	NA	NA	NA	NA
B090	indica	Changsha	×9311 Hmp	NA	NA	NA	NA	NA	NA
B091	indica	Changsha	×9311 Hmp	1.57598	33.5136	149.04	4.4161	66.4861	0.699501
B092	indica	Changsha	×9311 Hmp	1.32598	6.76364	41.5402	-1.0839	2.85113	-0.0754987
B093	indica	Changsha	×9311 Hmp	-0.0240166	-7.15302	-23.0932	1.74944	-0.997206	0.584501
B094	indica	Changsha	×9311 Hmp	NA	NA	NA	NA	NA	NA
B095	indica	Changsha	×9311 Hmp	NA	NA	NA	NA	NA	NA
B096	indica	Changsha	×9311 Hmp	0.150983	8.18864	38.0902	3.74944	47.1361	0.317835
B097	indica	Changsha	×9311 Hmp	NA	NA	NA	NA	NA	NA
B100	japonica	Changsha	×9311 Hmp	3.40932	41.047	187.757	8.00868	35.8601	0.517083
B101	japonica	Changsha	×9311 Hmp	3.17598	13.8136	74.6402	7.08277	8.52113	0.647835
B102	japonica	Changsha	×9311 Hmp	5.07598	24.4136	129.94	-0.792228	15.7945	-0.213832
B103	japonica	Changsha	×9311 Hmp	NA	NA	NA	NA	NA	NA
B104	indica	Changsha	×9311 Hmp	0.250181	-2.30109	-16.8875	NA	NA	NA
B105	indica	Changsha	×9311 Hmp	NA	NA	NA	NA	NA	NA
B106	indica	Changsha	×9311 Hmp	-1.02402	1.73031	9.47351	NA	NA	NA
B107	indica	Changsha	×9311 Hmp	2.30932	6.33031	16.5735	NA	NA	NA
B108	indica	Changsha	×9311 Hmp	NA	NA	NA	NA	NA	NA
B109	japonica	Changsha	×9311 Hmp	1.27598	9.01364	50.0402	0.832772	17.0445	1.44617
B110	japonica	Changsha	×9311 Hmp	0.525983	32.6136	132.765	1.9161	3.57613	0.194501
B111	japonica	Changsha	×9311 Hmp	-3.59068	-20.3864	-68.5098	11.7494	7.34847	0.04375
B112	indica	Changsha	×9311 Hmp	NA	NA	NA	NA	NA	NA
B113	indica	Changsha	×9311 Hmp	0.101786	26.9284	100.468	NA	NA	NA
B114	indica	Changsha	×9311 Hmp	0.401786	-4.27163	-7.53214	NA	NA	NA
B115	indica	Changsha	×9311 Hmp	-0.349017	8.06364	33.5902	-0.750562	32.3528	0.629501
B116	indica	Changsha	×9311 Hmp	2.87598	6.01364	39.5402	NA	NA	NA
B117	japonica	Changsha	×9311 Hmp	1.77598	20.6136	83.3402	-0.843137	6.09545	0.623586
B118	indica	Changsha	×9311 Hmp	-0.549017	0.413643	1.34018	NA	NA	NA
B119	indica	Changsha	×9311 Hmp	1.70179	13.6284	64.2679	-3.03299	-13.8332	0.04875
B120	indica	Changsha	×9311 Hmp	0.175983	6.11364	39.0068	2.74944	12.9278	-0.0604987
B121	indica	Changsha	×9311 Hmp	0.675983	6.41364	23.8402	-3.8339	-7.86137	0.477835
B122	japonica	Changsha	×9311 Hmp	-0.324017	11.1136	52.5402	0.457772	-1.20221	0.722835
B123	indica	Changsha	×9311 Hmp	2.37598	13.1136	80.5402	-2.8848	19.0605	-0.216414
B124	japonica	Changsha	×9311 Hmp	1.50932	9.21364	34.2068	9.74944	4.59113	0.349501
B125	indica	Changsha	×9311 Hmp	0.650181	-4.60109	-11.1875	2.9902	NA	NA
B126	indica	Changsha	×9311 Hmp	NA	NA	NA	NA	NA	NA
B127	indica	Changsha	×9311 Hmp	1.17598	0.213643	8.64018	4.58277	20.5945	0.149501
B128	indica	Changsha	×9311 Hmp	NA	NA	NA	NA	NA	NA
B129	indica	Changsha	×9311 Hmp	0.975983	18.747	73.9068	NA	NA	NA
B130	indica	Changsha	×9311 Hmp	-0.0240166	-1.88636	1.04018	2.95777	-6.37054	-0.315499
B131	indica	Changsha	×9311 Hmp	NA	NA	NA	NA	NA	NA
B132	indica	Changsha	×9311 Hmp	NA	NA	NA	NA	NA	NA
B133	indica	Changsha	×9311 Hmp	0.675983	-5.88636	-13.9598	1.15686	22.0005	-0.138081
B134	japonica	Changsha	×9311 Hmp	NA	NA	NA	NA	NA	NA
B135	indica	Changsha	×9311 Hmp	-1.12402	18.7136	63.4902	NA	NA	NA
B136	japonica	Changsha	×9311 Hmp	1.87598	19.1136	95.8152	NA	NA	NA
B137	indica	Changsha	×9311 Hmp	4.10179	19.8284	107.168	NA	NA	NA
[truncated: 670 more rows]

## Sheet: Supplementary Table 2b
Supplementary Table 2b Significant difference between middle parent heterosis value (Hmp) under Changsha environment and that under Saya environment for different combinations and different traits
Combination/Trait	PBP	SBP	SPP	KGW	PNP	GWP
J×Nip	Sig.	Sig.	Sig.	Sig.	NS	Sig.
J×9311	Sig.	Sig.	Sig.	NS	NS	Sig.
I×Nip	Sig.	Sig.	Sig.	NS	Sig.	Sig.
I×9311	Sig.	Sig.	Sig.	NS	NS	Sig.
Note: Sig. means significant difference at significance level of 0.05; NS menas no significance.
