# Supplementary material for: Large scale genomic and transcriptomic profiles of rice hybrids revealed a novel universal mechanism underlying yield heterosis
Source: Research Square preprint supplement (doi:10.21203/rs.3.rs-753426/v1), 2021-08-17
Supplement: Supplementary file 10 [file d585e4771e7768b66c12fc40.xlsx]

## Sheet: Sheet1
Supplementary Table 5 Summary of the QTLs identified by GWAS in parent populations
Population	Trait	Changsha				Sanya			Colocalized QTLs between two environments (%)
		QTL number	PVE average(%)*	PVE range (%)		QTL number	PVE average(%)	PVE range (%)
Japonica	PBP	63	12.1997	8.79-17.51		53	12.244	9.25-16.15	16(25.4%)
	SBP	61	13.9512	9.48-17.92		60	12.8667	8.30-19.97	27(44.26%)
	SPP	54	11.5774	8.24-17.82		66	12.4752	8.86-19.47	23(42.59%)
	KGW	65	16.6539	11.94-29.45		53	15.0104	10.21-20.70	27(41.54%)
	PNP	57	10.63	7.38-16.49		75	7.73	4.72-12.10	6(10.53%)
	GWP	11	19.88	15.21-26.33		17	18.57	15.06-25.07	1(9.09%)
Indica	PBP	94	8.53702	6.13-14.19		69	7.22261	5.13-12.07	48(51.06%)
	SBP	76	8.99577	5.96-12.93		23	7.51391	5.59-9.37	11(14.47%)
	SPP	45	9.35909	6.55-12.58		41	7.74146	5.27-12.85	12(26.67%)
	KGW	59	12.0355	8.38-17.21		101	9.26172	6.54-12.86	23(38.98%)
	PNP	31	15.53	11.80-21.34		42	11.58	8.78-16.53	5(16.13%)
	GWP	19	14.56	10.91-18.87		24	10.4	8.74-13.70	0(0%)
* PVE, means the phenotypic variation explained by dientified QTLs.
