# Supplementary material for: Large scale genomic and transcriptomic profiles of rice hybrids revealed a novel universal mechanism underlying yield heterosis
Source: Research Square preprint supplement (doi:10.21203/rs.3.rs-753426/v1), 2021-08-17
Supplement: Supplementary file 12 [file e7b22e0072408cb6c6b1a70e.xlsx]

## Sheet: Supplementary Table 10a
Supplementary Table 10a The primers used in vertor construction and RT-PCR
Primer name	5' sequence 3'
HRR-SSU1-F	TGGGCTGGTAGGATTACCATTTACATTTGATTATCTCTCCGGATCCCCGGGTTAATTAA
HRR-SSU1-R	GAACTACACGCTGGTTGGCTATTCTTTTAGAACCTCTAGGAATTCGAGCTCGTTTAAAC
SSU1-Ck-F	CCAAGCAAGGTGAATCTGATAG
SSU1-Ck-R	GGTCAAACTGCCTCGTAAGAG
SSU1-Leu-LM-Ck-F	CCAAGCAAGGTGAATCTGATAG
SSU1-Leu-LM-Ck-R	GTAAGACGATTGCTAACCACC
SSU1-Leu-RM-Ck-F	TGGTTTGTACGAACCATGCC
SSU1-Leu-RM-Ck-R	GGTCAAACTGCCTCGTAAGAG
SSU1-His-LM-Ck-F	CCAAGCAAGGTGAATCTGATAG
SSU1-His-LM-Ck-R	CTGCAGCGAGGAGCCGTAAT
SSU1-His-RM-Ck-F	CCTCGACATCATCTGCCCAGAT
SSU1-His-RM-CkR	GGTCAAACTGCCTCGTAAGAG
FZF1-OE-F	GTCAAGGAGAAAAAACCCCGGATTCTAGAATGACGGATATAGGGAGAAC
FZF1-OE-R	GCGTGACATAACTAATTACATGACTCGAGTCAGTATTCGAATAAATCCCAG
FZF1-QRT-F	CGAAGGAGTGAATGCGAATGTG
FZF1-QRT-R	TGGAGAGCCGGAAGGTAA
SSU1-QRT-F	GCATGCTGCCCGTAAATCTTC
SSU1-QRT-R	AGAGCCGAGTTTGATTCTTCCA
18SrRNA-F	TTAGTTGGTGGAGTGATTTG
18SrRNA-R	GGTGGCTCTGTCAGTGTAG

## Sheet: Supplementary Table 10b
Supplementary Table 10b The relationship between the expression of transcription factors and their downstream target genes
Regulation mode	Gene	Recognition Motifs	Number of motifs	Expression level								Determination coefficient*
WAR1 -> PDR12	WAR1			1.01134	1.6927	2.832	117.71	150.246	196.068	330.654	507.135	0.58
	PDR2	TCACGGTTCCTAACC, TTACCAACCGGTCCC, CCGTTAAGAGCCGATTCGCCG	3	1.63582	1.89406	4.25314	1.78982	3.13556	2.1546	5.2354	6.13671
VHR1 -> Bio5	VHR1			1.00655	1.12734	2.919	14.6844	19.2654	24.4739	53.625	81.2893	0.86
	Bio5	TGAATCATACATTGCTGA	1	0.010415	0.0133939	0.0302035	0.0131267	0.0131	0.021835	0.036	0.0794673
VHR1 -> VHT1	VHR1			1.00655	1.12734	2.919	14.6844	19.2654	24.4739	53.625	81.2893	0.6
	VHT1	TGAATCACTTTAGGATGA	1	0.410055	0.427462	0.533071	0.101495	0.5435	0.689096	0.7123	1.01768
AZF1 -> GLN3	AZF1			1.00246	1.12877	3.20788	3.68229	6.2546	7.53126	8.135	10.9794	0.11
	GLN3	AAGAAAAAA, AAAAAGAAAAA, AAGAAAAAGAAA	3	0.914907	1.06632	2.56174	0.272994	0.32456	0.763335	0.6543	0.500943
AFT1 -> FIT3	AFT1			1.0081	1.10387	2.41945	12.2867	16.6531	28.9897	42.321	61.3127	0.86
	FIT3	TGGGTGAA, TGCACCCT, CGCACCCC, AGGGTGCA	4	22.2826	24.5019	80.2173	170.788	135.255	104.628	165.645	603.572
FZF1 -> SSU1	FZF1			1.00538	1.19782	3.02691	32.2023	36.2654	55.8534	62.3546	94.8442	0.88
	SSU1	AAGGCAACAATAG	1	4.53819	6.55847	19.2146	20.0423	37.2546	74.785	78.3255	85.7629
* The square of the correlation coefficient between the expression levels of transcription factors and their downstream target genes

## Sheet: Supplementary Table 10c
Supplementary Table 10c Expression of wild type (SSU1/SSU1), double mutant (ssu1/ssu1) and heterozygous mutant (SSU1/ssu1) of SSU1 under different FZF1 overexpression levels.
Classification	Genotype	FZF1 Relative Expression	SSU1 Relative Expression
Empty	AA	0.954672	0.150655
Empty	AA	2.12542	0.264549
Empty	AA	1.62459	1.06677
Empty	AA	1.95574	1.27337
Empty	AA	1.00328	0.800937
Empty	AA	1.00025	1
Empty	Aa	3.41167	1.26906
Empty	Aa	2.86372	0.81907
Empty	Aa	1.66222	0.698563
Empty	Aa	2.1414	1.07038
Empty	Aa	2.57146	1.29453
Empty	Aa	5.84536	1.43442
Empty	Aa	2.65575	0.334091
Empty	Aa	7.98487	1.65449
Empty	Aa	1.28549	0.41145
Empty	Aa	1.27711	1.1287
Empty	Aa	1.27138	0.571912
Empty	Aa	6.39493	0.986761
Empty	aa	5.60917	0.367394
Empty	aa	0.189598	0.19777
Empty	aa	0.981961	0.187829
Empty	aa	1.32513	0.266018
Empty	aa	3.9336	0.286919
Empty	aa	1.44159	0.40331
OE(0-10)	AA	0.545874	0.604785
OE(0-10)	AA	9.53776	1.01164
OE(0-10)	AA	4.68271	0.701047
OE(0-10)	AA	5.20422	1.21551
OE(0-10)	AA	9.09014	2.1662
OE(0-10)	AA	2.84142	0.206286
OE(0-10)	Aa	6.94237	0.760651
OE(0-10)	Aa	4.64696	0.467194
OE(0-10)	Aa	5.74989	0.631202
OE(0-10)	Aa	3.43591	0.302456
OE(0-10)	Aa	9.06952	0.905212
OE(0-10)	Aa	6.92344	0.898395
OE(0-10)	Aa	5.05945	1.45472
OE(0-10)	Aa	4.84239	0.372675
OE(0-10)	Aa	9.81178	1.5127
OE(0-10)	aa	9.76691	0.358437
OE(0-10)	aa	4.95542	1.06522
OE(0-10)	aa	7.49443	0.212879
OE(0-10)	aa	8.75958	0.638971
OE(0-10)	aa	5.77298	0.0953861
OE(0-10)	aa	3.66639	0.17925
OE(0-10)	aa	3.1362	0.069696
OE(0-10)	aa	8.79724	0.0904616
OE(10-20)	AA	10.9275	0.741
OE(10-20)	AA	13.2868	1.21846
OE(10-20)	AA	13.2254	1.75135
OE(10-20)	AA	13.23	1.2277
OE(10-20)	AA	19.0015	3.128
OE(10-20)	AA	14.4664	1.32232
OE(10-20)	Aa	16.0693	1.52152
OE(10-20)	Aa	14.973	0.834168
OE(10-20)	Aa	12.0709	0.585275
OE(10-20)	Aa	11.1028	0.436405
OE(10-20)	Aa	16.5192	1.67373
OE(10-20)	Aa	12.292	1.0354
OE(10-20)	Aa	16.9756	1.17324
OE(10-20)	Aa	10.4182	1.28117
OE(10-20)	Aa	16.4544	1.71542
OE(10-20)	Aa	12.28	1.58389
OE(10-20)	aa	13.867	0.360316
OE(10-20)	aa	12.4797	0.925409
OE(10-20)	aa	13.452	0.56
OE(10-20)	aa	14.132	0.725
OE(10-20)	aa	15.4536	0.6426
OE(>20)	AA	21.0196	3.97235
OE(>20)	AA	41.7593	5.24296
OE(>20)	AA	189.283	11.7012
OE(>20)	AA	52.3412	5.1234
OE(>20)	AA	75.2356	6.4356
OE(>20)	AA	46.4512	6.1534
OE(>20)	Aa	22.9917	1.84186
OE(>20)	Aa	178.561	5.70704
OE(>20)	Aa	23.8274	1.83051
OE(>20)	Aa	32.9642	2.2894
OE(>20)	Aa	20.2954	0.733308
OE(>20)	Aa	247.547	11.5258
OE(>20)	Aa	61.2831	3.96974
OE(>20)	Aa	96.8761	3.44026
OE(>20)	Aa	47.2559	4.1068
OE(>20)	Aa	62.7036	1.19745
OE(>20)	Aa	114.247	4.59247
OE(>20)	aa	24.3511	1.31963
OE(>20)	aa	22.5598	0.96512
OE(>20)	aa	21.6356	0.903782
OE(>20)	aa	23.7541	1.75273
OE(>20)	aa	57.8692	1.17376
OE(>20)	aa	87.0538	1.75364
OE(>20)	aa	135.973	1.69685
OE(>20)	aa	47.3654	0.419897
OE(>20)	aa	77.0538	1.065

## Sheet: Supplementary Table 10d
Supplementary Table 10d Expression of wild type (SSU1/SSU1), double mutant (ssu1/ssu1) and heterozygous mutant (SSU1/ssu1) of SSU1 under different FZF1 overexpression levels in a repeat experiment
Classification	Genotype	FZF1 Relative Expression	SSU1 Relative Expression
Empty	AA	0.357712	1.08745
Empty	AA	3.2544	1.42909
Empty	AA	1.00266	1.24745
Empty	AA	2.1456	1.26546
Empty	Aa	2.71732	1.1324
Empty	Aa	1.42385	2.42198
Empty	Aa	0.84686	1.15802
Empty	Aa	1.05409	1.72286
Empty	Aa	0.560607	0.98591
Empty	Aa	0.935408	1.13409
Empty	Aa	0.335897	2.35663
Empty	Aa	0.216134	0.634301
Empty	Aa	0.173786	3.15365
Empty	Aa	0.315689	2.57842
Empty	Aa	1.4283	6.55856
Empty	aa	0.434103	0.604951
Empty	aa	0.36371	0.928186
Empty	aa	0.20781	0.6795
Empty	aa	0.305134	0.777815
Empty	aa	0.397664	0.806273
OE(0-5)	AA	4.80314	2.73006
OE(0-5)	AA	2.72553	0.661257
OE(0-5)	AA	4.15313	1.19486
OE(0-5)	AA	3.6283	1.32049
OE(0-5)	AA	4.50311	1.49714
OE(0-5)	AA	4.41825	3.40126
OE(0-5)	AA	1.92962	0.773717
OE(0-5)	Aa	2.99461	1.55159
OE(0-5)	Aa	3.89692	2.21488
OE(0-5)	Aa	1.32395	0.880367
OE(0-5)	Aa	0.87107	0.4847
OE(0-5)	Aa	3.77333	1.18305
OE(0-5)	Aa	2.60577	1.80888
OE(0-5)	Aa	0.592967	2.53158
OE(0-5)	Aa	1.90251	0.75425
OE(0-5)	Aa	3.82225	2.05755
OE(0-5)	Aa	4.32495	1.38687
OE(0-5)	Aa	1.02664	0.735077
OE(0-5)	Aa	2.13927	1.14346
OE(0-5)	Aa	1.01126	0.556671
OE(0-5)	Aa	0.802335	0.31071
OE(0-5)	Aa	0.447851	0.18714
OE(0-5)	Aa	0.469494	0.356825
OE(0-5)	Aa	0.676697	0.227933
OE(0-5)	Aa	0.586857	0.231367
OE(0-5)	Aa	0.122647	0.282707
OE(0-5)	Aa	1.14063	0.90689
OE(0-5)	Aa	3.65058	2.15437
OE(0-5)	Aa	0.000848362	0.398346
OE(0-5)	Aa	0.000654552	0.893076
OE(0-5)	Aa	3.85433	2.22248
OE(0-5)	Aa	3.24112	1.73731
OE(0-5)	Aa	4.79644	18.1155
OE(0-5)	Aa	3.87451	4.15683
OE(0-5)	Aa	1.74588	1.20399
OE(0-5)	aa	0.802335	0.31071
OE(0-5)	aa	1.83787	0.375162
OE(0-5)	aa	2.67019	0.69156
OE(0-5)	aa	4.54029	1.10999
OE(6-10)	AA	7.56789	4.70907
OE(6-10)	AA	9.75722	4.77052
OE(6-10)	AA	6.44668	2.39761
OE(6-10)	AA	6.98593	3.78451
OE(6-10)	AA	9.33887	4.22649
OE(6-10)	AA	8.16827	3.39718
OE(6-10)	AA	9.24627	10.1145
OE(6-10)	AA	7.295	4.24743
OE(6-10)	Aa	5.38123	3.03507
OE(6-10)	Aa	5.60982	3.7128
OE(6-10)	Aa	8.49507	7.03626
OE(6-10)	Aa	6.03483	4.2566
OE(6-10)	Aa	6.02703	5.55454
OE(6-10)	aa	7.22425	4.36158
OE(6-10)	aa	8.25642	3.09618
OE(6-10)	aa	6.98542	4.41791
OE(6-10)	aa	6.25416	3.79758
OE(>10)	AA	60.5958	56.8357
OE(>10)	AA	24.1346	16.6088
OE(>10)	AA	35.6278	53.4421
OE(>10)	AA	26.0999	14.5655
OE(>10)	Aa	13.4795	6.88425
OE(>10)	Aa	21.5445	9.52456
OE(>10)	Aa	16.1079	17.6734
OE(>10)	Aa	36.6397	31.0003
OE(>10)	Aa	28.8282	23.7903
OE(>10)	aa	15.4134	9.71276
OE(>10)	aa	15.2864	1.94318
OE(>10)	aa	18.0245	3.05399
OE(>10)	aa	24.2344	9.79813
OE(>10)	aa	20.1322	11.5973
OE(>10)	aa	24.7671	4.70543
OE(>10)	aa	62.3494	12.7365
