# Supplementary material for: Large scale genomic and transcriptomic profiles of rice hybrids revealed a novel universal mechanism underlying yield heterosis
Source: Research Square preprint supplement (doi:10.21203/rs.3.rs-753426/v1), 2021-08-17
Supplement: Supplementary file 15 [file 3379c661ff36789b239c95fb.xlsx]

## Sheet: Sheet1
Supplementary Table 9 The expression pattern of rice genes in combination of PA64S and 9311											Note: P1POD means the positive overdominant expression with 9311 as the parent of high expression; NoDiff means no different expression among parents and hybrid; MP means middle-parent expression; CNOD and CPOD mean comlementary negative overdominant expression and comlementary positive overdominant expression.
Gene ID	Transcription factor	Expression levels in 9311 (P1), PA64S (P2) and LYP9									Expression pattern between parents and their hybrid			Reported/Cloned	Cloned and related to grain number	Tissue number for different expression patterns
		9311_3mm	PA64S_3mm	LYP9_3mm	9311_2mm	PA64S_2mm	LYP9_2mm	9311_1mm	PA64S_1mm	LYP9_1mm	1mm	2mm	3mm			NOD	ND	NPD	MP	PPD	PD	POD	CNOD	CPOD
LOC_Os01g01010		27.9694	20.8858	33.8911	20.5774	18.1583	22.5371	19.4434	14.1803	19.2098	NoDiff	NoDiff	P1POD			0	0	0	0	0	0	1	0	0
LOC_Os01g01019		0	0	0	0	0.099435	0.19541	0	0	0.100116	CPOD	P2POD	NoDiff			0	0	0	0	0	0	2	0	1
LOC_Os01g01110		0.1463	0	0	0.1215	0.062886	0.27549	0.066461	0.631582	0.011872	P2ND	NoDiff	NoDiff			0	1	0	0	0	0	0	0	0
LOC_Os01g01150		12.6111	49.0051	61.4016	51.4509	39.7138	56.6673	24.6904	46.5765	28.7204	NoDiff	NoDiff	P2PD			0	0	0	0	0	1	0	0	0
LOC_Os01g01180		0	0	0	0.242013	0.250522	0.748965	0.270396	0	0.257604	NoDiff	P2POD	NoDiff			0	0	0	0	0	0	1	0	0
LOC_Os01g01450		18.2229	21.3647	9.59619	14.6515	15.9782	12.2937	14.4132	10.3303	15.7355	NoDiff	NoDiff	P2NOD			1	0	0	0	0	0	0	0	0
LOC_Os01g01500		0	0	0	0	0.157955	0	0.171006	0	0.535293	P1PD	NoDiff	NoDiff			0	0	0	0	0	1	0	0	0
LOC_Os01g01520		5.49034	20.1662	8.62611	1.98523	15.3449	8.8324	3.70323	14.6713	9.33154		P2MP				0	0	0	1	0	0	0	0	0
LOC_Os01g01560	1	0.203677	8.58425	4.23158	0	7.71781	4.8695	0.105744	6.41542	3.70481	P2MP	P2MP	P2MP			0	0	0	3	0	0	0	0	0
LOC_Os01g01570		10.2822	37.4078	25.0281	8.37959	33.7224	31.1318	8.85288	35.6988	24.5373	P2MP		P2MP			0	0	0	2	0	0	0	0	0
LOC_Os01g01660		0	3.00127	0.927815	0	2.05049	0.272824	0	3.23331	0.09348	P2ND	P2ND	P2NPD			0	2	1	0	0	0	0	0	0
LOC_Os01g01720		15.1211	16.867	1.67687	10.0185	18.0609	15.9091	7.8362	11.1704	9.1121	NoDiff	NoDiff	P2NOD			1	0	0	0	0	0	0	0	0
LOC_Os01g01740		37.0262	28.6456	38.3711	30.7215	27.9289	31.7084	30.2893	23.7139	30.647			P1PD			0	0	0	0	0	1	0	0	0
LOC_Os01g01770		0	0	0.653262	0	0.836292	0.712178	0	1.02934	0.392941			CPOD			0	0	0	0	0	0	1	0	1
LOC_Os01g01830		53.9024	23.1926	42.2326	36.1513	20.8368	33.1769	30.7215	18.9811	28.3959			P1MP			0	0	0	1	0	0	0	0	0
LOC_Os01g01870	1	31.9314	74.6729	44.3215	23.1569	52.4004	41.6445	20.6119	71.0732	46.782	P2MP	NoDiff				0	0	0	1	0	0	0	0	0
LOC_Os01g01880		0	0	0.179826	0	0.089651	0	0.092773	0	0.361057	P1POD	NoDiff	CPOD			0	0	0	0	0	0	2	0	1
LOC_Os01g01910		3.9673	5.57148	1.76668	2.82847	4.33046	4.71979	2.56915	5.08736	4.11847	NoDiff	NoDiff	P2ND			0	1	0	0	0	0	0	0	0
LOC_Os01g02010		0.092581	0	0	0.269104	0	0	0	0	0	NoDiff	P1ND	NoDiff			0	1	0	0	0	0	0	0	0
LOC_Os01g02040		42.9736	26.4719	29.6368	42.3477	31.6335	45.9721	22.5271	33.5385	50.57	P2POD					0	0	0	0	0	0	1	0	0
LOC_Os01g02050		2.60974	2.73816	0.674223	0.975575	2.10315	2.87692	0.62744	1.77746	1.14704	NoDiff	P2PD	P2NOD			1	0	0	0	0	1	0	0	0
LOC_Os01g02160		0.555708	0.787915	0.136895	0.13186	0.614232	0.268242	0.072127	0.280007	0.824582	P2POD	NoDiff	P2ND			0	1	0	0	0	0	1	0	0
LOC_Os01g02170		6.15651	7.87815	8.80455	4.7877	6.97777	8.65248	6.09492	9.3155	9.9633	P2PD	P2PD				0	0	0	0	0	2	0	0	0
LOC_Os01g02180		25.1967	27.9187	23.9453	28.5276	25.7163	31.1656	3.50895	28.9863	28.6383	P2PD	NoDiff	NoDiff			0	0	0	0	0	1	0	0	0
LOC_Os01g02190		0.37422	0	0	0	0	0	0	0	0	NoDiff	NoDiff	P1ND			0	1	0	0	0	0	0	0	0
LOC_Os01g02210		0	0	0.116166	0.083921	0.183314	0.310262	0.091809	0.237607	0.204085	NoDiff	P2PD	NoDiff			0	0	0	0	0	1	0	0	0
LOC_Os01g02250		0.048459	0	0	0	0	0.068225	0	0	0	NoDiff	CPOD				0	0	0	0	0	0	1	0	1
LOC_Os01g02300		13.0144	12.763	13.5395	12.4869	11.1425	15.0174	13.6512	9.37753	11.6211	NoDiff	P1PD	NoDiff			0	0	0	0	0	1	0	0	0
LOC_Os01g02320		0.786933	27.2708	11.0925	0.518987	23.4515	16.0003	1.07246	20.7716	13.2685			P2MP			0	0	0	1	0	0	0	0	0
LOC_Os01g02334		59.6682	33.2488	41.1757	47.3026	33.8794	82.0749	47.5871	38.6932	48.2014	NoDiff	P1POD	NoDiff			0	0	0	0	0	0	1	0	0
LOC_Os01g02430		42.0835	0.555791	22.118	33.8836	0	21.5562	29.857	0.32919	18.6059	P1MP	P1MP	P1MP			0	0	0	3	0	0	0	0	0
LOC_Os01g02440		6.96691	0	3.89904	8.64399	0	4.44868	5.7676	0	3.82748	P1MP	P1MP	P1MP			0	0	0	3	0	0	0	0	0
LOC_Os01g02470		0	0	2.05209	0.68	1.14548	0	0.315035	1.22308	0.821605	NoDiff	NoDiff	CPOD			0	0	0	0	0	0	1	0	1
LOC_Os01g02500		0	0	1.56108	0	0.887275	1.61358	0.669411	0.483433	0.382809	NoDiff		CPOD			0	0	0	0	0	0	1	0	1
LOC_Os01g02520		0.12705	3.01482	1.18307	0.084411	1.99355	1.76849	0.161605	3.011	1.58427	P2MP					0	0	0	1	0	0	0	0	0
LOC_Os01g02540		0.121178	0	0.202328	0.066932	0	0.125961	0	0	0.194793	CPOD	NoDiff				0	0	0	0	0	0	1	0	1
LOC_Os01g02560		10.8389	1.30336	6.27754	9.74972	0.646705	6.13931	10.9275	0.669891	5.92096	P1MP	P1MP	P1MP			0	0	0	3	0	0	0	0	0
LOC_Os01g02570		3.17522	0	1.91265	3.79708	0.103795	1.86492	2.25076	0	1.78401		P1MP	P1MP			0	0	0	2	0	0	0	0	0
LOC_Os01g02590		0	4.01316	2.00737	0.294643	3.73561	2.00794	0.299614	3.48747	1.98854	P2MP	P2MP	P2MP			0	0	0	3	0	0	0	0	0
LOC_Os01g02610		0	0.144715	0.167623	0	0.041783	0.164226	0	0	0	NoDiff	P2PD				0	0	0	0	0	1	0	0	0
LOC_Os01g02629		0.411327	0.796204	1.15061	0.984169	0.522377	1.65036	0.927795	0.659451	0.856197	NoDiff	P1PD	NoDiff			0	0	0	0	0	1	0	0	0
LOC_Os01g02660		0.063402	0.869535	0.281534	0.156671	0.918765	0.995786	0.115208	1.32563	0.993352		P2PD				0	0	0	0	0	1	0	0	0
LOC_Os01g02700		7.78005	0.219187	3.52265	5.93785	0.094928	4.3607	6.92242	0	3.84703	P1MP		P1MP			0	0	0	2	0	0	0	0	0
LOC_Os01g02730		5.73075	0.27556	2.90906	4.07158	0.149179	2.51078	5.92018	0	2.47912	P1MP	NoDiff	P1MP			0	0	0	2	0	0	0	0	0
LOC_Os01g02840		1.73941	4.41445	3.88166	1.55786	3.18575	3.9286	1.42542	4.00475	3.89764		P2PD				0	0	0	0	0	1	0	0	0
LOC_Os01g02980		4.96068	17.353	12.8303	4.29603	10.5399	14.8321	2.38707	8.14384	8.35411		P2PD				0	0	0	0	0	1	0	0	0
LOC_Os01g03060		210.753	124.187	26.954	0.43147	119.794	169.302	136.291	88.7151	126.93		P2POD	P1NOD			1	0	0	0	0	0	1	0	0
LOC_Os01g03090		48.4565	38.9033	0	13.101	31.6852	39.516	25.3443	29.0967	1.56128	P2ND		CNOD			1	1	0	0	0	0	0	1	0
LOC_Os01g03100		34.8192	33.5794	32.8021	24.2173	26.7746	36.9923	24.3413	24.9262	23.1467	NoDiff	P2POD	NoDiff			0	0	0	0	0	0	1	0	0
LOC_Os01g03290		0	0	0	0	0.304682	0	0	0	0	NoDiff	P2ND	NoDiff			0	1	0	0	0	0	0	0	0
LOC_Os01g03320		0.067963	0	0	0.282213	0	0	0	0	0	NoDiff	P1ND	NoDiff			0	1	0	0	0	0	0	0	0
LOC_Os01g03464		0.082501	0	0	0	0.023642	0.162615	0	0	0	NoDiff	P2POD				0	0	0	0	0	0	1	0	0
LOC_Os01g03549		10.0229	13.5635	7.57061	7.88406	10.8286	9.01203	6.25922	9.56652	6.42784	NoDiff	NoDiff	P2ND			0	1	0	0	0	0	0	0	0
LOC_Os01g03690		2.09482	2.62832	3.71937	2.83936	4.85595	4.47945	4.4865	6.06427	6.82709	P2PD					0	0	0	0	0	1	0	0	0
LOC_Os01g03730		2.34488	2.86886	5.86017	1.59329	3.24476	2.16345	0.84546	2.36759	3.15533	NoDiff	NoDiff	P2POD			0	0	0	0	0	0	1	0	0
LOC_Os01g04000		0	0	0.285983	0	0	0	0	0	0	NoDiff	NoDiff	CPOD			0	0	0	0	0	0	1	0	1
LOC_Os01g04020	1	37.443	25.6566	16.8695	42.4568	36.4401	45.334	31.118	28.5218	262.359	P1POD	NoDiff	NoDiff			0	0	0	0	0	0	1	0	0
LOC_Os01g04130		0.397516	0	1.97307	0	0.540004	2.50176	0	0.737482	0.660094	NoDiff	P2POD				0	0	0	0	0	0	1	0	0
LOC_Os01g04140		0.26623	0	0.84945	0.309748	0.167181	0.236296	0.437933	0	0.319653	NoDiff	NoDiff	P1POD			0	0	0	0	0	0	1	0	0
LOC_Os01g04210		0.560276	0.307885	0	0.218966	0	0.336917	0.14373	0.264612	0	P2ND	P1PD	CNOD			1	1	0	0	0	1	0	1	0
LOC_Os01g04220		0.153859	0	0	0	0	0	0	0.28381	0.417891	P2PD	NoDiff	NoDiff			0	0	0	0	0	1	0	0	0
LOC_Os01g04270		0	0	0	0	0	0	0	0.478927	0.235063	P2MP	NoDiff	NoDiff			0	0	0	1	0	0	0	0	0
LOC_Os01g04280		5.31643	4.03716	6.65427	9.07643	7.29824	9.02998	13.0069	8.1757	11.2147	P1MP		P1PD			0	0	0	1	0	1	0	0	0
LOC_Os01g04340		0	0	0.120591	0.107686	0.06012	0.118147	0	0.493316	0.245908	P2MP	NoDiff	NoDiff			0	0	0	1	0	0	0	0	0
LOC_Os01g04360		3.46948	1.80372	3.27631	3.01857	4.04791	12.1185	4.20297	3.93339	4.99025	NoDiff	P2POD	NoDiff			0	0	0	0	0	0	1	0	0
LOC_Os01g04370		1.37859	0.456085	3.56589	0.318028	0.98763	6.79314	0.974189	0.405203	1.59103	P1PD	P2POD	P1POD			0	0	0	0	0	1	2	0	0
LOC_Os01g04380		0.926681	0.459867	1.06532	0.833731	1.19499	4.56632	1.82421	2.58757	1.73791	NoDiff	P2POD	NoDiff	OsHSP17.0		0	0	0	0	0	0	1	0	0
LOC_Os01g04440		0	0.239585	0	0	0	0	0.219322	0	0	P1ND	NoDiff	P2ND			0	2	0	0	0	0	0	0	0
LOC_Os01g04590		0.15886	0	0	0	0	0.111527	0	0.155223	0	P2ND	CPOD	P1ND			0	2	0	0	0	0	1	0	1
LOC_Os01g04600		16.7029	17.2774	22.3836	18.4042	13.0839	16.743	9.91246	16.0543	17.3205		NoDiff	P2POD			0	0	0	0	0	0	1	0	0
LOC_Os01g04620		0	0.152836	0	0	0	0.06504	0	0	0	NoDiff	NoDiff	P2ND			0	1	0	0	0	0	0	0	0
LOC_Os01g04660		0	0	0.131992	0	0.361918	0.129317	0	0.539951	0	P2ND		NoDiff			0	1	0	0	0	0	0	0	0
LOC_Os01g04699		0	0	0	0.371986	0	0.569575	0.623404	0	0	P1ND	P1PD	NoDiff			0	1	0	0	0	1	0	0	0
LOC_Os01g04990		23.3902	18.5563	0.670113	18.118	16.5376	2.7888	2.72669	13.5508	19.396	NoDiff	NoDiff	P1NOD			1	0	0	0	0	0	0	0	0
LOC_Os01g05070		176.166	151.944	109.594	151.628	128.345	149.312	124.104	119.831	135.163	NoDiff	NoDiff	P1NOD			1	0	0	0	0	0	0	0	0
LOC_Os01g05160		0	0	0	0.098448	0	0	0.117494	0.199552	0	CNOD		NoDiff			1	0	0	0	0	0	0	1	0
LOC_Os01g05310		0.134385	0.133378	0	0	0.115529	0.05676	0.061049	0	0.11632		NoDiff	CNOD			1	0	0	0	0	0	0	1	0
LOC_Os01g05460		8.15729	8.16406	12.5476	6.24014	8.21681	0	0	0	0	NoDiff	P2ND	NoDiff			0	1	0	0	0	0	0	0	0
LOC_Os01g05470		128.362	92.6501	106.644	100.81	81.8954	106.758	91.5326	68.5558	108.976	P1PD					0	0	0	0	0	1	0	0	0
LOC_Os01g05530		18.2325	13.0863	17.2367	13.7297	11.7884	17.7216	11.4627	8.71194	11.9326		P1POD				0	0	0	0	0	0	1	0	0
LOC_Os01g05540		10.3511	6.86023	6.64856	8.57123	6.12728	10.7314	10.3435	9.88043	10.9392	NoDiff	P1PD				0	0	0	0	0	1	0	0	0
LOC_Os01g05570		0	0.101075	0	0	0	0	0	0	0	NoDiff	NoDiff	P2ND			0	1	0	0	0	0	0	0	0
LOC_Os01g05660		1.48079	2.20453	1.99023	1.32021	3.12639	1.36037	2.05765	2.30422	2.46922	NoDiff	P2ND	NoDiff			0	1	0	0	0	0	0	0	0
LOC_Os01g05680		2.07783	0	8.59409	9.0237	2.49336	0	2.29731	4.82535	4.49139	NoDiff	P1ND	P1POD			0	1	0	0	0	0	1	0	0
LOC_Os01g05820		0	0	0	0.063982	0.368071	0	0	0	0	NoDiff	CNOD	NoDiff			1	0	0	0	0	0	0	1	0
LOC_Os01g05830		16.5157	17.6813	23.4689	15.3996	15.1384	17.3809	11.0626	11.5121	26.1457	P2PD	NoDiff	NoDiff			0	0	0	0	0	1	0	0	0
LOC_Os01g05860		14.8731	11.8859	16.0831	15.0102	14.2333	15.3609	18.0508	9.87862	14.1874	P1MP	NoDiff				0	0	0	1	0	0	0	0	0
LOC_Os01g05970		2267.44	1160.09	1159.34	1160.17	792.644	1092.69	1108.82	923.753	1014.67	NoDiff	NoDiff	P1ND			0	1	0	0	0	0	0	0	0
LOC_Os01g06040		0	0	0	0	0	0	0	0	0.182574	CPOD	NoDiff	NoDiff			0	0	0	0	0	0	1	0	1
LOC_Os01g06130		4.77141	12.5175	15.1686	3.46532	3.72964	4.32136	10.3619	9.33079	8.92082	NoDiff	NoDiff	P2PD			0	0	0	0	0	1	0	0	0
LOC_Os01g06170		0	0	0	0	0	0.08193	0	0	0	NoDiff	CPOD	NoDiff			0	0	0	0	0	0	1	0	1
LOC_Os01g06210		0.20691	0	0	0.171836	0	0.407829	0.250654	0	0.477589	P1PD	P1PD	NoDiff			0	0	0	0	0	2	0	0	0
LOC_Os01g06420		0	0.204384	0	0	0.088517	0	0	0	0	NoDiff	NoDiff	P2ND			0	1	0	0	0	0	0	0	0
LOC_Os01g06440		0	0	0	0.036847	0.038142	0	0	0.234736	0.038403	P2ND	NoDiff	NoDiff			0	1	0	0	0	0	0	0	0
LOC_Os01g06460		99.1506	106.894	67.9822	79.153	75.0798	76.0825	92.948	106.447	107.692	NoDiff	NoDiff	P2NOD			1	0	0	0	0	0	0	0	0
LOC_Os01g06470		55.406	21.9415	24.2374	35.0331	30.9154	37.0939	44.7881	36.0423	36.6616	NoDiff	NoDiff	P1ND	α2		0	1	0	0	0	0	0	0	0
LOC_Os01g06500		0.673283	0	0	0	0	0.171339	0	0	0	NoDiff	NoDiff	P1ND			0	1	0	0	0	0	0	0	0
LOC_Os01g06550	1	18.0065	13.9614	19.37	18.7414	14.7602	20.3147	13.326	13.6796	21.0593	P2PD	NoDiff	NoDiff			0	0	0	0	0	1	0	0	0
LOC_Os01g06590		12.0941	16.4534	19.0647	15.3719	17.6261	14.5384	11.1132	15.2868	18.3598	P2PD	NoDiff	P2PD			0	0	0	0	0	2	0	0	0
LOC_Os01g06770		0.253465	0.167709	0.515535	0	0.383005	0.377241	0.153524	0.425713	0.478709			P1POD			0	0	0	0	0	0	1	0	0
LOC_Os01g06800		0	0.185088	0	0	0.08016	0	0	0	0.322834	CPOD	NoDiff	NoDiff			0	0	0	0	0	0	1	0	1
LOC_Os01g06890		1.27972	1.42154	1.73064	1.25829	1.10574	1.70756	1.52554	1.29304	2.01447	P1POD	P1POD				0	0	0	0	0	0	2	0	0
LOC_Os01g07090		0	0	0	0	0	0.742689	0	0	0	NoDiff	CPOD	NoDiff	OsPP2C01		0	0	0	0	0	0	1	0	1
LOC_Os01g07130		1.63072	0.877266	1.67679	0.209362	0.212223	1.09351	0	0.098702	2.05214	P2POD	NoDiff	NoDiff			0	0	0	0	0	0	1	0	0
LOC_Os01g07140		17.7822	22.1308	27.4698	17.4811	20.4831	5.79392	13.0812	16.6984	19.2655	NoDiff	P2NOD				1	0	0	0	0	0	0	0	0
LOC_Os01g07150		0.318972	0	0.550039	0.441504	0.548434	0.572572	0.382381	0.089847	1.20408	P1PD	NoDiff	NoDiff			0	0	0	0	0	1	0	0	0
LOC_Os01g07160		0.048931	0.097129	0	0.040637	0.042066	0.041334	0	0	0.211769	CPOD	NoDiff	CNOD			1	0	0	0	0	0	1	1	1
LOC_Os01g07190		0	0	0	0	0.408245	0	0	0	0	NoDiff	P2ND	NoDiff			0	1	0	0	0	0	0	0	0
LOC_Os01g07280		8.14211	6.03566	9.30304	6.15049	6.7521	7.97627	6.41079	6.52545	6.28149	NoDiff	P2POD	P1POD			0	0	0	0	0	0	2	0	0
LOC_Os01g07320		10.3145	0	0	5.80835	3.48832	7.13729	6.67259	5.72334	7.73034	NoDiff	NoDiff	P1ND			0	1	0	0	0	0	0	0	0
LOC_Os01g07330		9.58061	6.93762	11.082	9.10882	5.77039	6.89634	4.75617	4.85358	5.49588	NoDiff	NoDiff	P1PD			0	0	0	0	0	1	0	0	0
LOC_Os01g07340		2.16306	1.20983	0.693636	0.975287	1.37085	1.56765	0.997015	1.89337	0.755516	P2ND		P1ND			0	2	0	0	0	0	0	0	0
LOC_Os01g07370		78.1549	63.0271	71.1033	61.1059	59.5938	57.281	13.4999	191.974	18.9807	P2ND	NoDiff	NoDiff			0	1	0	0	0	0	0	0	0
LOC_Os01g07420		0	0	0	0	0.110661	0.217472	0	0	0	NoDiff	P2POD	NoDiff			0	0	0	0	0	0	1	0	0
LOC_Os01g07480		17.3548	16.1317	15.9389	13.9943	17.3663	24.8711	24.1166	17.1406	26.5998	P1PD	P2POD	NoDiff	OsCrll4		0	0	0	0	0	1	1	0	0
LOC_Os01g07530		0.355065	0.220252	0.114803	0.129008	0.248012	0.487394	0.322597	0.39136	0.307335	NoDiff	P2PD	NoDiff			0	0	0	0	0	1	0	0	0
LOC_Os01g07570		51.0554	61.4549	45.3169	37.643	52.9071	36.8952	34.3776	49.7664	41.7754	P2MP	P2ND	P2ND			0	2	0	1	0	0	0	0	0
LOC_Os01g07620		9.28875	8.49633	4.92063	5.92451	5.86296	5.63237	5.89222	8.57779	8.25178	NoDiff	NoDiff	P1NOD			1	0	0	0	0	0	0	0	0
LOC_Os01g07650		0	0	0	0.243822	0.757184	0	0	0	0	NoDiff	P2ND	NoDiff			0	1	0	0	0	0	0	0	0
LOC_Os01g07720		14.2439	12.9233	10.418	15.7459	9.66882	13.2191	10.5797	10.8854	17.2941	P2POD	NoDiff	NoDiff			0	0	0	0	0	0	1	0	0
LOC_Os01g07740		67.6889	54.4395	59.0116	66.7197	31.2801	81.0653	58.0576	106.335	75.0412		P1PD	NoDiff			0	0	0	0	0	1	0	0	0
LOC_Os01g07800		1.37421	1.73588	2.55258	1.62231	1.59216	1.40453	1.52213	1.196	2.15549	P1POD	NoDiff	P2POD			0	0	0	0	0	0	2	0	0
LOC_Os01g07810		50.9313	36.5044	14.3101	32.5621	29.119	37.785	50.4143	38.2634	50.6844	NoDiff	NoDiff	P1NOD			1	0	0	0	0	0	0	0	0
LOC_Os01g07900		0.091029	0.180692	0.156971	0.100797	0.319547	0.820213	0.082705	0.160534	0.211754	NoDiff	P2POD	NoDiff			0	0	0	0	0	0	1	0	0
LOC_Os01g07910		1.58149	1.56579	0	0	0	1.14016	0	0	0	NoDiff	CPOD	CNOD			1	0	0	0	0	0	1	1	1
LOC_Os01g07940		19.652	10.2798	6.87828	9.77088	10.7899	15.3151	11.1809	11.3546	11.3237	NoDiff	P2POD	P1NOD			1	0	0	0	0	0	1	0	0
LOC_Os01g07960		8.90165	6.0857	6.27586	13.9172	8.5577	83.0995	91.5687	66.9325	88.955	NoDiff	P1POD	NoDiff			0	0	0	0	0	0	1	0	0
LOC_Os01g07990		0.517274	1.20799	1.8381	0.699138	0.575487	0.925325	0.428506	0.399664	0.994245	NoDiff	NoDiff	P2PD			0	0	0	0	0	1	0	0	0
LOC_Os01g08120		4.84965	3.46022	6.39515	5.44423	4.35264	6.71734	5.39104	4.25832	5.9007	NoDiff		P1PD			0	0	0	0	0	1	0	0	0
LOC_Os01g08250		0.039192	0.155593	0.090112	0.184443	0.101079	0.132267	0.071217	0	0.21485	P1PD	NoDiff	NoDiff			0	0	0	0	0	1	0	0	0
LOC_Os01g08260		101.463	119.573	162.79	121.985	100.014	109.422	82.4601	83.5123	95.5575	NoDiff	NoDiff	P2POD	OsABCG31		0	0	0	0	0	0	1	0	0
LOC_Os01g08270		13.0693	14.4096	16.2791	10.8491	10.0733	14.7034	10.1846	8.07565	11.3023		P1POD				0	0	0	0	0	0	1	0	0
LOC_Os01g08280		22.114	22.3352	15.9908	17.5591	17.2482	14.2108	15.999	14.1344	14.3416	NoDiff	NoDiff	P2ND			0	1	0	0	0	0	0	0	0
LOC_Os01g08450		0	0	10.6462	0	0	0	0	0	0	NoDiff	NoDiff	CPOD			0	0	0	0	0	0	1	0	1
LOC_Os01g08490		0	0	0	0	0.256731	0	0	0	0	NoDiff	P2ND	NoDiff			0	1	0	0	0	0	0	0	0
LOC_Os01g08530		0.07528	0	0.076927	0.037049	0	0	0.081063	0.078673	0.308913	P1POD	NoDiff	NoDiff			0	0	0	0	0	0	1	0	0
LOC_Os01g08560		215.981	152.293	88.364	192.708	183.311	150.017	170.939	167.164	175.129	NoDiff	NoDiff	P1ND			0	1	0	0	0	0	0	0	0
LOC_Os01g08680		10.0167	5.76271	11.8763	10.5172	4.43429	7.11022	4.81155	5.22	4.50478	NoDiff		P1PD			0	0	0	0	0	1	0	0	0
LOC_Os01g08700		99.2925	102.684	126.487	82.655	72.8952	136.829	73.5429	69.244	123.451	P1POD	P1POD	NoDiff	OsGI		0	0	0	0	0	0	2	0	0
LOC_Os01g08710	1	10.53	13.0482	5.55328	3.82284	8.05384	6.16723	4.95174	6.75355	6.8173	NoDiff	NoDiff	P2NOD			1	0	0	0	0	0	0	0	0
LOC_Os01g08750		38.648	25.3528	48.8327	39.8804	22.2265	37.0757	39.1182	24.5333	37.0399	NoDiff		P1PD			0	0	0	0	0	1	0	0	0
LOC_Os01g08814		14.5588	15.1353	19.3491	3.55474	5.10361	14.5296	11.5332	10.1167	15.1946	NoDiff	P2PD	NoDiff			0	0	0	0	0	1	0	0	0
LOC_Os01g08860		3.62521	5.51187	3.05918	2.49824	12.5325	14.8556	3.99451	14.0107	9.07984	NoDiff	P2PD	NoDiff	Oshsp18.0-CII		0	0	0	0	0	1	0	0	0
LOC_Os01g08930		7.42146	4.00563	3.16815	4.72748	4.34996	5.39373	3.661	3.88711	2.92954	NoDiff	NoDiff	P1ND			0	1	0	0	0	0	0	0	0
LOC_Os01g08970		85.5191	51.3285	114.086	70.4505	63.3266	101.191	82.5781	61.6611	71.9338	NoDiff	P1POD	P1PD			0	0	0	0	0	1	1	0	0
LOC_Os01g09000		25.6037	16.4266	47.1563	21.0274	13.9483	18.4382	10.7778	9.43845	17.0482	NoDiff	NoDiff	P1POD			0	0	0	0	0	0	1	0	0
LOC_Os01g09010		36.1541	39.154	17.6884	22.1804	33.8129	30.5738	26.905	28.5975	25.054	NoDiff	NoDiff	P2NOD			1	0	0	0	0	0	0	0	0
LOC_Os01g09030		31.3201	14.7251	30.3546	26.2867	13.698	25.7124	21.0644	16.0357	32.7366	P1POD					0	0	0	0	0	0	1	0	0
LOC_Os01g09170		2.63037	6.25657	5.99604	2.69503	5.23496	6.69016	3.00431	4.59021	4.47469	NoDiff	P2PD				0	0	0	0	0	1	0	0	0
LOC_Os01g09252		14.0828	10.6795	14.7771	12.8823	11.1564	16.6991	10.0618	9.94183	11.1645	NoDiff	P1POD				0	0	0	0	0	0	1	0	0
LOC_Os01g09360		0	0	0	0	0	0	0	0	0.383777	CPOD	NoDiff	NoDiff			0	0	0	0	0	0	1	0	1
LOC_Os01g09460		2.55376	1.60916	3.68977	1.60493	2.80952	2.50001	0.771454	1.31774	1.94551	NoDiff	NoDiff	P1PD			0	0	0	0	0	1	0	0	0
LOC_Os01g09580		0.123392	53.5581	61.5083	42.5625	7.86007	8.39318	21.0459	18.167	25.3185	NoDiff	NoDiff	P2PD			0	0	0	0	0	1	0	0	0
LOC_Os01g09620		121.235	108.104	23.2645	119.75	39.1935	129.331	174.613	26.3493	235.358	P1PD	NoDiff	NoDiff	OsDOS		0	0	0	0	0	1	0	0	0
LOC_Os01g09730		0	0	0.431612	0	0.249698	0.090365	0	0.454018	0.091435		NoDiff	CPOD			0	0	0	0	0	0	1	0	1
LOC_Os01g10130		61.4421	53.3796	90.8134	69.2844	61.8508	94.9077	57.474	36.8639	48.7893	NoDiff	P1POD	P1POD			0	0	0	0	0	0	2	0	0
LOC_Os01g10140		134.271	123.783	173.06	162.075	137.809	192.677	179.587	115.607	289.014	P1POD	NoDiff	NoDiff			0	0	0	0	0	0	1	0	0
LOC_Os01g10150		13.2734	6.37213	21.5321	28.1527	8.58412	45.9341	69.054	5.57361	54.1317		P1PD	NoDiff			0	0	0	0	0	1	0	0	0
LOC_Os01g10280		10.5192	9.31904	9.87308	8.44928	7.44349	16.5848	8.12389	11.4305	9.76866	NoDiff	P1POD	NoDiff			0	0	0	0	0	0	1	0	0
LOC_Os01g10380		8.18547	2.92922	4.73363	11.6716	1.71146	5.62975	3.32053	0.78264	0.956483	NoDiff	P1MP				0	0	0	1	0	0	0	0	0
LOC_Os01g10430		111.027	80.8248	124.894	78.0708	60.8578	81.3246	60.6296	56.6432	57.8941	NoDiff		P1PD			0	0	0	0	0	1	0	0	0
LOC_Os01g10640		0	0.800594	0	0.133981	0.277384	0.06814	0.073288	0.142256	0	NoDiff	NoDiff	P2ND			0	1	0	0	0	0	0	0	0
LOC_Os01g10660		0	0	0	0	0	0	0.543273	0.351506	0	CNOD	NoDiff	NoDiff			1	0	0	0	0	0	0	1	0
LOC_Os01g10790		29.1549	30.7893	33.1999	24.5176	21.7694	30.265	23.7427	23.3147	29.3611	NoDiff	P1PD	NoDiff			0	0	0	0	0	1	0	0	0
LOC_Os01g10880		0	0	0	22.8061	0	0	0	0	41.0208	CPOD		NoDiff			0	0	0	0	0	0	1	0	1
LOC_Os01g10950		1.04863	2.13491	0.324563	0.513596	1.71054	1.26815	0.732881	1.2803	1.09386	NoDiff	NoDiff	P2ND			0	1	0	0	0	0	0	0	0
LOC_Os01g11010		0.568401	0	0.272266	0.183575	0	0.106699	0.372975	0.05569	0.081998		NoDiff	P1MP			0	0	0	1	0	0	0	0	0
LOC_Os01g11160		0	0	0	0.073845	0	0.275409	0.161574	0	0.15393	NoDiff	P1PD	NoDiff			0	0	0	0	0	1	0	0	0
LOC_Os01g11310		0	0	0	0.187946	0	0.120738	0.17856	0	0	P1ND		NoDiff			0	1	0	0	0	0	0	0	0
LOC_Os01g11490		0	0	0.161483	0	0	0	0	0	0	NoDiff	NoDiff	CPOD			0	0	0	0	0	0	1	0	1
LOC_Os01g11770		0.678923	0.269533	0.234149	0	0.350197	0.114702	0.123368	1.19732	0.117532	P2ND	NoDiff				0	1	0	0	0	0	0	0	0
LOC_Os01g11920		4.17308	4.10738	4.50639	4.4729	5.52007	6.56148	2.21782	4.14073	4.92062	P2PD		NoDiff			0	0	0	0	0	1	0	0	0
LOC_Os01g12000		0	0	0	0	0	0.044798	0.048183	0	0.045903		CPOD	NoDiff			0	0	0	0	0	0	1	0	1
LOC_Os01g12190		2.75269	1.93888	1.83746	3.3185	6.71768	5.85072	9.27784	7.82986	12.067	P1PD	NoDiff	NoDiff			0	0	0	0	0	1	0	0	0
LOC_Os01g12220		0	0	0	0	0	0.943651	0.147857	0	0.211293	NoDiff	CPOD	NoDiff			0	0	0	0	0	0	1	0	1
LOC_Os01g12240		0	0	13.8682	0	0	0	0	0	0	NoDiff	NoDiff	CPOD			0	0	0	0	0	0	1	0	1
LOC_Os01g12260		22.6227	19.6861	9.85518	7.49928	16.2806	7.79882	15.4831	19.0167	16.8033	NoDiff	NoDiff	P1NOD			1	0	0	0	0	0	0	0	0
LOC_Os01g12290		0	2.89563	2.66536	0	4.06508	2.1339	0	2.85134	1.77913		P2MP				0	0	0	1	0	0	0	0	0
LOC_Os01g12420		8.75267	3.99278	5.85945	7.69977	4.33277	6.3019	7.56182	3.24452	5.21527	P1MP		P1MP			0	0	0	2	0	0	0	0	0
LOC_Os01g12430		31.7403	19.6909	26.1133	25.7764	13.3309	21.2364	18.2415	11.8788	15.1419	NoDiff		P1MP			0	0	0	1	0	0	0	0	0
LOC_Os01g12440	1	16.8134	13.9751	11.466	14.7533	19.0039	26.8688	33.578	27.4031	36.4592	P1PD	P2POD	NoDiff			0	0	0	0	0	1	1	0	0
LOC_Os01g12560		26.7437	15.0437	21.1981	10.9101	8.79285	16.5509	10.0502	5.24747	8.273	NoDiff	P1POD	P1MP			0	0	0	1	0	0	1	0	0
LOC_Os01g12660		14.4244	17.3942	21.5879	17.754	22.788	23.8455	21.1408	21.093	28.2548	P1POD	P2PD	P2POD			0	0	0	0	0	1	2	0	0
LOC_Os01g12690		20.6636	17.3028	7.93532	13.3392	14.3479	13.269	9.76896	11.2367	8.1578	NoDiff	NoDiff	P1NOD			1	0	0	0	0	0	0	0	0
LOC_Os01g12780		0	0	0.221681	0	0	0	0	0.226712	0		NoDiff	CPOD			0	0	0	0	0	0	1	0	1
LOC_Os01g12930		0.144463	0.154793	0	0.059642	0.093855	0.054938	0.085021	0	0.095462	NoDiff	NoDiff	P2ND			0	1	0	0	0	0	0	0	0
LOC_Os01g13030		140.213	116.224	130.924	80.4769	76.9603	101.287	63.9006	55.0007	69.1358	NoDiff	P1PD	NoDiff			0	0	0	0	0	1	0	0	0
LOC_Os01g13040		0	0.146022	0	0.061093	0.379446	0.124282	0.133672	0.908122	0.700415	P2PPD					0	0	0	0	1	0	0	0	0
LOC_Os01g13140		1.81005	2.22104	1.00238	1.41471	3.81437	3.14043	3.77571	6.04708	3.73992	P2ND					0	1	0	0	0	0	0	0	0
LOC_Os01g13229		0	0	6.94466	0	0	0	0	10.8181	0	P2ND	NoDiff	CPOD			0	1	0	0	0	0	1	0	1
LOC_Os01g13350		31.4748	24.9848	22.6825	23.6926	21.0442	28.0435	17.7617	18.9111	22.7683	NoDiff	P1PD	P1ND			0	1	0	0	0	1	0	0	0
LOC_Os01g13440		0	0.31402	0	0	0	0.066816	0	0.418479	0	P2ND	CPOD	P2ND			0	2	0	0	0	0	1	0	1
LOC_Os01g13570		0.654729	0	1.00268	0.395098	0.636206	0.669791	0.480265	0.466108	0.915089	NoDiff	NoDiff	P1PD			0	0	0	0	0	1	0	0	0
LOC_Os01g13640		0.937863	1.32371	0.356799	0.257754	0.442421	1.81065	1.12794	1.68857	1.14614	NoDiff	P2POD	NoDiff			0	0	0	0	0	0	1	0	0
LOC_Os01g13660		140.022	141.216	73.6361	84.7012	97.4446	103.059	65.0609	89.9855	86.926	NoDiff	NoDiff	P2NOD			1	0	0	0	0	0	0	0	0
LOC_Os01g13740	1	1.17001	1.64271	0.908126	0.770586	1.96186	0.673646	0.410121	1.10564	0.672902	NoDiff	P2ND				0	1	0	0	0	0	0	0	0
LOC_Os01g13780		0.1042	0.620508	0.179684	0	0.940578	0.132031	0.047335	0.459403	0.225481	NoDiff	P2ND				0	1	0	0	0	0	0	0	0
LOC_Os01g13800		59.6284	49.8525	47.8421	53.5191	45.4847	58.8347	38.9936	40.8695	41.6876	NoDiff	P1PD				0	0	0	0	0	1	0	0	0
LOC_Os01g13950		0	0	0	0.156667	0.081088	0.478062	0.171394	0	0	NoDiff	P1POD	NoDiff	OsGRX3		0	0	0	0	0	0	1	0	0
LOC_Os01g14100		13.7689	12.3463	23.2609	9.55846	13.8956	20.8611	7.54846	10.5281	9.55004	NoDiff	P2PD	P1POD			0	0	0	0	0	1	1	0	0
LOC_Os01g14290		0.107818	0.749076	0	0.313399	0.69518	0.379193	0.519771	0.440258	1.1199	P1POD	NoDiff				0	0	0	0	0	0	1	0	0
LOC_Os01g14340		0	0	0	0	0.06504	0	0	0	0.065485	CPOD		NoDiff			0	0	0	0	0	0	1	0	1
LOC_Os01g14360		0	0	0.44075	0	0	0	0	0	0	NoDiff	NoDiff	CPOD			0	0	0	0	0	0	1	0	1
LOC_Os01g14430		0	0	0	0	0.078696	0	0	0	0	NoDiff	P2ND	NoDiff			0	1	0	0	0	0	0	0	0
LOC_Os01g14580		12.4664	0	12.2668	1.98696	2.0571	0.697254	1.12456	0.147109	0	NoDiff	NoDiff	P1PD			0	0	0	0	0	1	0	0	0
LOC_Os01g14620		0	0	0	0	0	0.142266	0	0	0	NoDiff	CPOD	NoDiff			0	0	0	0	0	0	1	0	1
LOC_Os01g14640		0.407991	0.404933	0	0	0	0	0.185342	0.179878	0	NoDiff	NoDiff	CNOD			1	0	0	0	0	0	0	1	0
LOC_Os01g14720		46.9024	7.08946	24.116	46.0314	6.58105	23.7505	40.4687	5.23492	28.4652	P1MP	P1MP	P1MP			0	0	0	3	0	0	0	0	0
LOC_Os01g14810		21.4425	17.9662	23.7614	14.3034	19.2461	24.5466	16.0342	18.1336	19.427	NoDiff	P2PD	NoDiff			0	0	0	0	0	1	0	0	0
LOC_Os01g14850		1523.32	2338.18	1373.31	2585.26	2925.19	2558.82	1626.48	1708.33	1797.66		P2ND	P2ND			0	2	0	0	0	0	0	0	0
LOC_Os01g14870		13.147	4.4979	5.914	11.2549	2.59946	6.73067	12.2473	3.59138	7.90522	P1MP	P1MP	P1ND			0	1	0	2	0	0	0	0	0
LOC_Os01g14880		1.07286	0	0	0.167063	0	0.906284	0.487381	0	0	NoDiff	P1POD				0	0	0	0	0	0	1	0	0
LOC_Os01g14940		0	0	0.092081	0	0	0.045108	0	0.094171	0		NoDiff	CPOD			0	0	0	0	0	0	1	0	1
LOC_Os01g15000		7.23476	6.56421	6.8354	6.18703	6.37719	7.79013	5.17346	4.54703	7.74333	P1PD	NoDiff	NoDiff			0	0	0	0	0	1	0	0	0
LOC_Os01g15070		0	0	0	0.103694	0	0	0	0.440392	0	P2ND	NoDiff	NoDiff			0	1	0	0	0	0	0	0	0
LOC_Os01g15170		2.03116	0	0	6.45655	0	4.25995	5.50953	0	0	P1ND	P1PPD	P1ND			0	2	0	0	1	0	0	0	0
LOC_Os01g15200		0	1.40439	0	0	3.97074	1.92038	0	1.39	1.27493	NoDiff	P2MP				0	0	0	1	0	0	0	0	0
LOC_Os01g15240		0	0	0.158746	0.229358	0.158281	0.155527	0	0	0	NoDiff	NoDiff	CPOD			0	0	0	0	0	0	1	0	1
LOC_Os01g15260		145.032	170.027	91.2005	118.834	177.106	162.583	97.515	211.432	167.819	P2MP		P2NOD			1	0	0	1	0	0	0	0	0
LOC_Os01g15280	1	3.01005	8.04142	6.19081	2.67305	5.07249	5.09438	2.16601	6.45555	5.47855			P2MP			0	0	0	1	0	0	0	0	0
LOC_Os01g15320		135.842	227.289	262.183	146.78	409.081	204.777	164.053	177.362	163.476	NoDiff	P2ND	P2PD			0	1	0	0	0	1	0	0	0
LOC_Os01g15340		0	0	0	0	0	0.061653	0.132625	0.128714	0	CNOD	NoDiff	NoDiff	OsRAA1		1	0	0	0	0	0	0	1	0
LOC_Os01g15460		52.1599	44.5488	31.1412	26.8258	44.0199	19.5662	32.7184	45.5332	48.0848		P2ND	P1NOD			1	1	0	0	0	0	0	0	0
LOC_Os01g15470		14.916	13.189	9.7197	10.8741	11.2639	10.7746	11.6712	8.65472	11.0843	NoDiff	NoDiff	P1ND			0	1	0	0	0	0	0	0	0
LOC_Os01g15510		0	0	0	0	0	0.367815	0	0.199653	0.137619	NoDiff	CPOD	NoDiff			0	0	0	0	0	0	1	0	1
LOC_Os01g15520		3.70989	34.607	21.2134	2.14563	41.663	23.5864	0	32.0356	23.8241	P2PPD	P2MP	P2MP			0	0	0	2	1	0	0	0	0
LOC_Os01g15780		22.9133	16.877	26.666	24.6417	19.6611	31.0779	22.0833	17.6152	18.6101	NoDiff	P1POD	P1PD	OsGT1		0	0	0	0	0	1	1	0	0
LOC_Os01g15830		9.97025	32.8369	14.4049	5.48993	19.0126	8.19398	5.51915	7.53415	5.76542	NoDiff		P2ND	OsPOX1; ddOs319		0	1	0	0	0	0	0	0	0
LOC_Os01g15890		1.46807	1.82266	2.71752	1.87824	2.52852	3.11587	1.9379	2.59983	2.74301	NoDiff		P2PD			0	0	0	0	0	1	0	0	0
LOC_Os01g15990		0.030933	0.061402	0	0.051379	0	0	0	0	0.133876	CPOD					0	0	0	0	0	0	1	0	1
LOC_Os01g16050		0.986915	0.509498	0.31615	0.865028	0.342506	1.18003	0.966125	0.623481	0.944858	NoDiff	P1PD				0	0	0	0	0	1	0	0	0
LOC_Os01g16180		13.9288	46.0618	61.3191	12.2804	41.3451	12.4367	13.208	45.5346	14.2097			P2PD			0	0	0	0	0	1	0	0	0
LOC_Os01g16240		670.837	611.806	543.187	510.809	480.463	492.5	464.881	481.659	420.508	NoDiff	NoDiff	P1ND	OsCam1-3		0	1	0	0	0	0	0	0	0
LOC_Os01g16350		15.0578	9.81099	12.8343	13.0286	9.32584	6.10838	11.8305	9.21468	11.1957	NoDiff	P1ND	NoDiff			0	1	0	0	0	0	0	0	0
LOC_Os01g16380		0.60163	0.265388	0	0.155849	0.313994	0.169405	0.218508	1.11729	0.265767	P2ND	NoDiff	CNOD			1	1	0	0	0	0	0	1	0
LOC_Os01g16450		41.9342	39.3792	34.9092	23.8635	50.1299	38.5274	36.15	68.8247	55.6832	P2MP		NoDiff			0	0	0	1	0	0	0	0	0
LOC_Os01g16470		0	0	0	0	0	0.026766	0	0	0	NoDiff	CPOD	NoDiff			0	0	0	0	0	0	1	0	1
LOC_Os01g16640		0	0	0	0	0	0	92.1609	0	90.4007	P1PD	NoDiff	NoDiff			0	0	0	0	0	1	0	0	0
LOC_Os01g16660		3.20004	11.5971	10.3225	2.01274	11.1638	9.1746	1.52992	11.822	6.44564	P2MP					0	0	0	1	0	0	0	0	0
LOC_Os01g16780		0.11693	0	0	0.087163	0.260278	0.375343	0.53908	0.739709	0.32018	P2ND	NoDiff	NoDiff			0	1	0	0	0	0	0	0	0
LOC_Os01g16930		16.4371	15.4364	14.9943	13.1288	14.5839	18.7225	14.9172	19.2615	17.5311	NoDiff	P2PD	NoDiff			0	0	0	0	0	1	0	0	0
LOC_Os01g16960		87.3986	66.9131	45.4553	32.7996	38.289	34.2415	24.2746	74.297	28.8444		NoDiff	P1ND			0	1	0	0	0	0	0	0	0
LOC_Os01g17000	1	51.4846	44.3611	60.8141	44.6141	41.4358	50.343	30.0911	32.8076	34.7647	NoDiff	NoDiff	P1PD			0	0	0	0	0	1	0	0	0
LOC_Os01g17070		9.23123	4.94521	6.64966	6.57737	6.27699	7.83354	7.87998	6.96125	8.06537	NoDiff	NoDiff	P1MP			0	0	0	1	0	0	0	0	0
LOC_Os01g17090		0.7623	0	1.31452	0	0	0.160985	0.173149	0.672178	0.164957	NoDiff	NoDiff	P1PD			0	0	0	0	0	1	0	0	0
LOC_Os01g17214		19.317	18.6531	25.2203	16.9775	19.0647	18.6661	23.1777	18.3142	23.1039	NoDiff	NoDiff	P1POD			0	0	0	0	0	0	1	0	0
LOC_Os01g17300		0	0	0.2335	0.07497	0	0	0	0	0	NoDiff	NoDiff	CPOD			0	0	0	0	0	0	1	0	1
LOC_Os01g17330		0.351761	0	0	0	0	0	0	0	0	NoDiff	NoDiff	P1ND	Os-eIF6;2		0	1	0	0	0	0	0	0	0
LOC_Os01g17396		18.1806	23.233	11.7354	16.7531	14.6854	12.1239	8.19395	7.32607	8.90094	NoDiff	NoDiff	P2ND			0	1	0	0	0	0	0	0	0
LOC_Os01g17470		2.92193	4.17804	2.27502	2.95613	8.09474	2.4598	3.48493	4.11479	2.45505	NoDiff	P2ND	NoDiff			0	1	0	0	0	0	0	0	0
LOC_Os01g17970		4.16955	0	0	0	0	0	0	0	0	NoDiff	NoDiff	P1ND			0	1	0	0	0	0	0	0	0
LOC_Os01g18000		0.632633	8.30215	5.82806	0.62791	5.02839	4.33306	0.378516	3.45398	2.59999			P2MP			0	0	0	1	0	0	0	0	0
LOC_Os01g18090		0	0	0.391607	0	0.010169	0	0.103166	0	0.098285	NoDiff	NoDiff	CPOD			0	0	0	0	0	0	1	0	1
LOC_Os01g18100		14.935	19.7871	13.2732	9.90134	15.6407	10.8903	11.4807	14.974	13.2385	NoDiff		P2ND			0	1	0	0	0	0	0	0	0
LOC_Os01g18190		0.703123	0.299397	1.30115	0.520465	0.258607	0.778094	0.869675	0	0.550873	NoDiff	NoDiff	P1PD			0	0	0	0	0	1	0	0	0
LOC_Os01g18310		1.03455	0.490553	0	0	3.64614	0.855001	6.38303	0	4.25643	P1MP		NoDiff			0	0	0	1	0	0	0	0	0
LOC_Os01g19020		0	0	0	0	0.078862	0	0	0	0.158804	CPOD	NoDiff	NoDiff			0	0	0	0	0	0	1	0	1
LOC_Os01g19130		10.441	15.6083	19.1161	10.9153	18.2781	15.4192	13.2322	22.2651	27.0774	P2PD	NoDiff				0	0	0	0	0	1	0	0	0
LOC_Os01g19150		71.9987	47.0251	17.8037	30.9655	44.2736	33.6231	33.0669	39.1611	35.6537	NoDiff	NoDiff	P1ND			0	1	0	0	0	0	0	0	0
LOC_Os01g19260		0	0	0	0	0	0.45714	0.430221	0	0.146381	P1MP	CPOD	NoDiff			0	0	0	1	0	0	1	0	1
LOC_Os01g19290		0	0	0	0	0	0	0	0.199437	0	P2ND	NoDiff	NoDiff			0	1	0	0	0	0	0	0	0
LOC_Os01g19300		0	0	0.456876	0	0	0	0	0	0	NoDiff	NoDiff	CPOD			0	0	0	0	0	0	1	0	1
LOC_Os01g19310		0	0.280026	0	0	0	0	0	0	0.244258	CPOD	NoDiff				0	0	0	0	0	0	1	0	1
LOC_Os01g19460		0.255054	0.266676	0.231667	0.175328	0.449204	0.340457	0	0.806857	0.336883	P2MP	NoDiff	NoDiff			0	0	0	1	0	0	0	0	0
LOC_Os01g19480		98.9962	70.148	62.5891	55.9147	87.799	88.5144	87.4504	103.195	102.13	NoDiff		P1ND			0	1	0	0	0	0	0	0	0
LOC_Os01g19548		36.0465	27.4769	0.483745	26.5483	25.674	30.3059	28.4628	23.2375	0.141814	NoDiff	NoDiff	P1ND			0	1	0	0	0	0	0	0	0
LOC_Os01g19650		0.412057	0.419995	0.519396	0.536456	0.404371	0.635431	0.646784	0.314875	0.77277	P1PD	NoDiff	NoDiff			0	0	0	0	0	1	0	0	0
LOC_Os01g19660		0	0	0	0	0	0.164489	0	0	0.048156	NoDiff	CPOD	NoDiff			0	0	0	0	0	0	1	0	1
LOC_Os01g19694	1	93.2534	70.0069	71.599	70.7054	89.6628	103.579	85.9967	96.5533	85.1335	NoDiff	P2PD		OSH6		0	0	0	0	0	1	0	0	0
LOC_Os01g19750		0	0	0.090129	0	0	0.044151	0	0	0	NoDiff	NoDiff	CPOD			0	0	0	0	0	0	1	0	1
LOC_Os01g19770		0	0.457969	0	0	1.19005	0.389783	0	0.508594	0.968852	P2PD		NoDiff			0	0	0	0	0	1	0	0	0
LOC_Os01g19800		0.527435	0	0.540259	0	0	0.553692	0	0	0	NoDiff	CPOD				0	0	0	0	0	0	1	0	1
LOC_Os01g19840		469.962	205.109	334.631	360.396	170.291	260.375	325.153	165.593	216.532	NoDiff	NoDiff	P1MP			0	0	0	1	0	0	0	0	0
LOC_Os01g19850		6.2191	3.33065	4.95583	4.57186	3.18011	7.03033	4.07484	3.36277	5.1693	NoDiff	P1PD	NoDiff			0	0	0	0	0	1	0	0	0
LOC_Os01g19910		1.64169	121.625	51.8567	0.959905	129.289	67.9116	4.74422	285.124	150.547	P2MP	P2MP	P2MP			0	0	0	3	0	0	0	0	0
LOC_Os01g19930		0.189467	0	0	0	0.054295	0	0	0	0.109331	CPOD		P1ND			0	1	0	0	0	0	1	0	1
LOC_Os01g20150		0	0	0.083156	0	0	0	0	0	0	NoDiff	NoDiff	CPOD			0	0	0	0	0	0	1	0	1
LOC_Os01g20200		8.16176	4.11827	5.40019	11.6394	1.57326	5.68755	2.86303	0.724863	0.948724	NoDiff	P1MP	NoDiff			0	0	0	1	0	0	0	0	0
LOC_Os01g20880		5.66037	0.130772	2.61807	4.51769	0.094393	2.7736	4.35392	0	3.30229			P1MP			0	0	0	1	0	0	0	0	0
LOC_Os01g20940		89.2656	67.5085	91.2704	79.1084	65.9326	85.7685	64.3305	51.1425	71.6979	P1PD	P1PD	P1PD			0	0	0	0	0	3	0	0	0
LOC_Os01g21050		1.31928	0.386775	2.51999	1.77327	0.659564	1.48135	2.12621	0.171813	0.505966		NoDiff	P1POD			0	0	0	0	0	0	1	0	0
LOC_Os01g21090		0	0	0	0	0	0.073784	0	0	0	NoDiff	CPOD	NoDiff			0	0	0	0	0	0	1	0	1
LOC_Os01g21135		0.736875	0.073135	0	0.275385	0.190045	0.217862	0.301273	0.129952	0.350801	NoDiff	NoDiff	P1ND			0	1	0	0	0	0	0	0	0
LOC_Os01g21160		52.2487	46.7207	31.5157	43.5553	38.6317	34.8199	25.3746	23.847	25.4656	NoDiff	NoDiff	P1NOD			1	0	0	0	0	0	0	0	0
LOC_Os01g21180		111.672	109.7	105.908	3.42214	23.8142	96.8678	69.5474	20.7615	1.37801	NoDiff	P2POD	NoDiff			0	0	0	0	0	0	1	0	0
LOC_Os01g21410		29.9092	30.4885	19.1252	20.6549	19.3587	23.9573	24.6833	26.5635	26.7014	NoDiff	NoDiff	P2NOD			1	0	0	0	0	0	0	0	0
LOC_Os01g21500		0.430417	1.73353	2.13777	0.744034	1.96513	2.77731	0.843172	1.53834	1.88566	NoDiff	P2PD				0	0	0	0	0	1	0	0	0
LOC_Os01g21542		0.569516	0.571197	0.496211	0.477955	0.742141	0.486153	0.64816	2.28362	0.363233	P2ND	NoDiff	NoDiff			0	1	0	0	0	0	0	0	0
LOC_Os01g21585		0	0	0	0	0	0.106907	0	0	0	NoDiff	CPOD	NoDiff			0	0	0	0	0	0	1	0	1
LOC_Os01g21870		0	0	0.307082	0.147892	0	0.366669	0.117975	0	0.15414	NoDiff	P1POD	CPOD			0	0	0	0	0	0	2	0	1
LOC_Os01g21900		0	0.941102	3.47961	0.98849	0.81541	2.89386	0	0	0	NoDiff	P1PD	P2POD			0	0	0	0	0	1	1	0	0
LOC_Os01g22000		0.45121	4.38954	3.26645	0.19962	3.37944	2.86042	0.12107	5.93601	2.59811	P2MP					0	0	0	1	0	0	0	0	0
LOC_Os01g22010		78.6093	87.9985	83.6107	79.4686	98.6303	1.89654	75.6468	94.9323	94.7643	NoDiff	P2ND	NoDiff			0	1	0	0	0	0	0	0	0
LOC_Os01g22050		0	0	0	0	0	0	0	0.135029	0	P2ND	NoDiff	NoDiff			0	1	0	0	0	0	0	0	0
LOC_Os01g22090		1.34021	10.5142	6.36523	0.99587	10.4711	7.38905	1.38392	9.56556	6.85856		P2MP	P2MP			0	0	0	2	0	0	0	0	0
LOC_Os01g22220		10.3428	6.42565	3.07015	0	2.29121	0	0.593716	0	2.61874	NoDiff	NoDiff	P1ND			0	1	0	0	0	0	0	0	0
LOC_Os01g22380		115.581	644.298	312.775	78.1442	421.686	244.804	74.8002	432.593	221.032		NoDiff	P2MP			0	0	0	1	0	0	0	0	0
LOC_Os01g22390		7.41193	19.5211	22.3794	14.616	16.3786	16.9931	7.92096	16.2711	18.3655		NoDiff	P2PD			0	0	0	0	0	1	0	0	0
LOC_Os01g22420		3.50643	7.16481	6.1575	3.17492	5.44774	7.73693	3.80639	4.97697	5.03236	NoDiff	P2PD	NoDiff			0	0	0	0	0	1	0	0	0
LOC_Os01g22480		1.71441	14.7114	11.6478	4.1475	12.3095	10.1871	4.05129	11.3622	8.81175			P2PD			0	0	0	0	0	1	0	0	0
LOC_Os01g22550		19.8598	14.9978	17.567	14.4701	12.706	17.6503	12.6653	13.3945	16.9606	P2POD	P1POD	NoDiff			0	0	0	0	0	0	2	0	0
LOC_Os01g22640		13.1896	24.476	19.3313	10.94	25.0377	17.4795	12.7322	31.3777	20.7781	P2MP	NoDiff	NoDiff			0	0	0	1	0	0	0	0	0
LOC_Os01g22750		4.03643	7.07757	6.03391	3.34762	5.38521	7.47653	4.30784	5.01465	5.50665	NoDiff	P2PD	NoDiff			0	0	0	0	0	1	0	0	0
LOC_Os01g22794		0	0	0	2.26128	0	0.068347	0.073305	0	0		P1NPD	NoDiff			0	0	1	0	0	0	0	0	0
LOC_Os01g22850		0	1.04818	0	0.501189	0.389108	0.955847	0.822456	0	0.522362	P1MP	P1POD	P2ND			0	1	0	1	0	0	1	0	0
LOC_Os01g22990		146.258	102.731	111.037	28.438	60.1331	108.872	96.2306	52.5894	89.1881	NoDiff	P2POD	NoDiff			0	0	0	0	0	0	1	0	0
LOC_Os01g23040		0.737991	1.60852	2.47781	1.50595	1.76973	2.51174	1.68222	1.67984	2.01795	NoDiff	NoDiff	P2PD			0	0	0	0	0	1	0	0	0
LOC_Os01g23080		0	0	0.133324	0	0	0	0	0	0.066923	CPOD	NoDiff	CPOD			0	0	0	0	0	0	2	0	2
LOC_Os01g23120		0	0	0.070224	0	0.105027	0.0344	0	0	0.158618	CPOD		CPOD			0	0	0	0	0	0	2	0	2
LOC_Os01g23300		0	0	1.76699	0	0.95832	0	3.65857	1.00177	0	P1ND	NoDiff	CPOD			0	1	0	0	0	0	1	0	1
LOC_Os01g23410		0.296932	0	0	0	0.116513	0	0	0	0	NoDiff		P1ND			0	1	0	0	0	0	0	0	0
LOC_Os01g23580		0	0	0.164757	0	0	0	0	0	0	NoDiff	NoDiff	CPOD			0	0	0	0	0	0	1	0	1
LOC_Os01g23590		45.7954	40.2618	47.8568	35.1782	28.3263	51.2065	32.7325	30.3037	30.3502	NoDiff	P1POD	NoDiff			0	0	0	0	0	0	1	0	0
LOC_Os01g23640		32.5099	32.1315	35.0789	26.2392	25.5277	24.7907	24.3744	22.8555	30.521	P1PD	NoDiff	NoDiff			0	0	0	0	0	1	0	0	0
LOC_Os01g24020		1.75363	0	1.40817	1.46393	3.22207	2.61215	0.552336	0	3.12012	P1POD	NoDiff	NoDiff			0	0	0	0	0	0	1	0	0
LOC_Os01g24060		9.0537	14.7353	11.882	11.8743	6.08593	8.0968	7.41768	12.5604	17.905	P2PD	NoDiff	NoDiff			0	0	0	0	0	1	0	0	0
LOC_Os01g24080		0	0	0	0	0	0.229665	0	0.280608	0	P2ND	CPOD	NoDiff			0	1	0	0	0	0	1	0	1
LOC_Os01g24170		0	3.05132	1.3498	0	2.54277	1.10307	0	0	2.41961	CPOD	NoDiff	NoDiff			0	0	0	0	0	0	1	0	1
LOC_Os01g24370		0	0	0.420431	0	0	0.300997	0	0	0.530973	CPOD	CPOD	CPOD			0	0	0	0	0	0	3	0	3
LOC_Os01g24380		0.409916	1.57016	1.78005	0.664904	1.11593	2.26428	1.1173	1.30839	1.79347	NoDiff	P2POD				0	0	0	0	0	0	1	0	0
LOC_Os01g24400		0	0	0	0.047233	0	0	0	0	0	NoDiff	P1ND	NoDiff			0	1	0	0	0	0	0	0	0
LOC_Os01g24420		0.411296	0	0	0	0	0	0	0	0	NoDiff	NoDiff	P1ND			0	1	0	0	0	0	0	0	0
LOC_Os01g24440		4.22776	13.5055	8.23279	3.79976	11.7384	8.30383	3.51828	14.9275	8.85309	P2MP	NoDiff				0	0	0	1	0	0	0	0	0
LOC_Os01g24740		0.609127	1.61216	0	0.505873	0.349106	0.686066	0.737904	0	0.702993	NoDiff	NoDiff	P2ND			0	1	0	0	0	0	0	0	0
LOC_Os01g24780		0	0	0	0	0	0.091406	0	0.318048	0	P2ND	CPOD	NoDiff			0	1	0	0	0	0	1	0	1
LOC_Os01g24810		0	0	0.071359	0	0.177878	0.034956	0.036031	0.56863	0.107458	P2NPD		CPOD			0	0	1	0	0	0	1	0	1
LOC_Os01g24820		0.076679	0.558093	0.467235	0	0.833467	0.615056	0.248672	0.840959	0.882689	P2PD					0	0	0	0	0	1	0	0	0
LOC_Os01g24870		0.083353	0	0	0	0	0.245415	0.159185	0	0		CPOD	NoDiff			0	0	0	0	0	0	1	0	1
LOC_Os01g24880		54.9546	31.1879	52.3017	36.3704	27.1988	29.622	34.8374	23.067	56.4778	P1PD	NoDiff	NoDiff			0	0	0	0	0	1	0	0	0
LOC_Os01g24890		0	0.263924	0	0	0	0.157241	0	0.187584	0.161121		CPOD	P2ND			0	1	0	0	0	0	1	0	1
LOC_Os01g24910		0	0	0	0	0.180104	0	0	0	0	NoDiff	P2ND	NoDiff			0	1	0	0	0	0	0	0	0
LOC_Os01g24920		1.45998	1.89658	4.31723	1.70483	1.37795	2.70338	1.80447	1.03387	1.29789	NoDiff	NoDiff	P2POD			0	0	0	0	0	0	1	0	0
LOC_Os01g25070		0	0	0	0	0	0	0	0.137327	0	P2ND	NoDiff	NoDiff			0	1	0	0	0	0	0	0	0
LOC_Os01g25140		5.14552	2.38715	3.09366	6.20529	1.25419	3.19749	2.59723	0.903962	0.904418	NoDiff	P1MP				0	0	0	1	0	0	0	0	0
LOC_Os01g25230		0	3.59147	0	0	0	1.61173	0	2.79866	1.17461	NoDiff	NoDiff	P2ND			0	1	0	0	0	0	0	0	0
LOC_Os01g25270		7.32742	10.9501	8.6944	6.98431	9.91424	12.3226	6.3737	11.4049	9.37963	NoDiff	P2PD	NoDiff			0	0	0	0	0	1	0	0	0
LOC_Os01g25320		12.6629	8.59925	14.8525	12.5928	8.44136	11.9603	10.7821	8.44464	11.05	NoDiff		P1PD			0	0	0	0	0	1	0	0	0
LOC_Os01g25484		6.50767	16.5724	7.76735	4.06348	14.0359	12.9785	5.65028	19.0717	10.8274	P2MP	P2PD	P2ND	PSR1		0	1	0	1	0	1	0	0	0
LOC_Os01g25650		0	0	0.176717	0.137238	0.022025	0.11903	0.139663	0	0	NoDiff	NoDiff	CPOD			0	0	0	0	0	0	1	0	1
LOC_Os01g25700		0.646122	0	0.536749	0.98827	0.511847	0.700985	1.31564	0.122409	0.804937	P1MP	NoDiff				0	0	0	1	0	0	0	0	0
LOC_Os01g25720		0.012112	2.16388	0.793695	0.010059	1.44739	0.429732	0.02201	0.875792	0.283071		P2MP	P2MP			0	0	0	2	0	0	0	0	0
LOC_Os01g25820		40.9222	53.7714	56.2804	35.2324	58.211	52.9445	23.8425	44.0379	61.803	P2PD	NoDiff	NoDiff	Osrboh1		0	0	0	0	0	1	0	0	0
LOC_Os01g25839		0.976661	2.74592	2.93825	0.809127	1.60266	2.58732	0.467898	1.59071	1.17398	NoDiff	P2POD	P2PD			0	0	0	0	0	1	1	0	0
LOC_Os01g25880		35.8595	33.1576	26.4608	37.0391	31.5271	33.7314	37.6687	30.549	32.421	NoDiff	NoDiff	P1ND			0	1	0	0	0	0	0	0	0
LOC_Os01g25950		0	0	0	0	0	0.084184	0	1.45352	0	P2ND	NoDiff	NoDiff			0	1	0	0	0	0	0	0	0
LOC_Os01g25980		0.113747	0	0.196147	0	0	0	0	0	0	NoDiff	NoDiff	P1PD			0	0	0	0	0	1	0	0	0
LOC_Os01g26070		0	6.33161	3.48359	0.0883	8.55213	5.47874	0.193203	12.7505	6.53422	P2MP		NoDiff			0	0	0	1	0	0	0	0	0
LOC_Os01g26130		49.2224	40.1083	53.0068	39.7963	42.6309	57.6523	40.893	36.2872	44.198	NoDiff	P2POD				0	0	0	0	0	0	1	0	0
LOC_Os01g26150		0	0	0	0.158967	0	0	0	0	0	NoDiff	P1ND	NoDiff			0	1	0	0	0	0	0	0	0
LOC_Os01g26280		0.201287	0	0.138841	0	0	0.20404	0	0	0	NoDiff	CPOD				0	0	0	0	0	0	1	0	1
LOC_Os01g26370		0.372945	7.58512	4.8999	0.368722	6.87036	5.37066	0.306572	6.16993	4.32946	P2MP	P2PPD	P2MP			0	0	0	2	1	0	0	0	0
LOC_Os01g26390		0	0.099444	0	0	0	0	0	0	0	NoDiff	NoDiff	P2ND			0	1	0	0	0	0	0	0	0
LOC_Os01g27020		45.4477	41.4254	46.1486	38.4576	37.2381	31.1471	34.4971	44.4006	69.6198	P2POD	NoDiff	NoDiff			0	0	0	0	0	0	1	0	0
LOC_Os01g27120		0	0.121594	0	0	0	0	0	0	0	NoDiff	NoDiff	P2ND			0	1	0	0	0	0	0	0	0
LOC_Os01g27230		0.069833	0.184822	0.280979	0.193316	0.611319	0.613778	0.148042	1.75995	0.706424	P2MP	NoDiff	NoDiff			0	0	0	1	0	0	0	0	0
LOC_Os01g27260		8.63163	0.569939	2.0011	4.15452	0	1.9684	1.82607	0.379765	1.17604	NoDiff		P1ND			0	1	0	0	0	0	0	0	0
LOC_Os01g27350		0	0	0	0	0	0.243077	0	0	0	NoDiff	CPOD	NoDiff			0	0	0	0	0	0	1	0	1
LOC_Os01g27530		0	0.587916	0	0	1.13545	0.419002	0	0.84981	0.396502		P2MP				0	0	0	1	0	0	0	0	0
LOC_Os01g27600		0.275412	0.221915	0.09639	0.123309	0.048054	0.047218	0	0	0	NoDiff	NoDiff	P1NOD			1	0	0	0	0	0	0	0	0
LOC_Os01g27680		0	0	0	0	0	0	0.087534	0	0	P1ND	NoDiff	NoDiff			0	1	0	0	0	0	0	0	0
LOC_Os01g27690		0	0.304772	0	0	0	0	0	0	0	NoDiff	NoDiff	P2ND			0	1	0	0	0	0	0	0	0
LOC_Os01g27720		71.5543	72.026	86.0045	61.9935	63.6165	55.8359	59.593	47.0711	62.0175		NoDiff	P2POD			0	0	0	0	0	0	1	0	0
LOC_Os01g27880		37.7277	37.2071	43.7059	27.9329	30.8957	34.6964	36.3349	29.0407	38.4056	P1PD	P2PD	P1POD	OsSPP		0	0	0	0	0	2	1	0	0
LOC_Os01g28050	1	0	0	0	0	0.210645	0	0	0	0	NoDiff	P2ND	NoDiff			0	1	0	0	0	0	0	0	0
LOC_Os01g28134		3.32211	7.85048	6.40097	1.90501	10.6042	6.40386	2.01972	7.88734	6.74294	P2PD	P2MP				0	0	0	1	0	1	0	0	0
LOC_Os01g28270		0.417315	2.64785	2.6917	0.186972	2.17443	2.63759	0.509298	1.62714	1.8191	NoDiff	P2PD				0	0	0	0	0	1	0	0	0
LOC_Os01g28300		34.3874	0.220904	18.5507	29.7344	0.223233	18.3627	31.6496	0.261678	17.114	P1MP	P1MP	P1MP			0	0	0	3	0	0	0	0	0
LOC_Os01g28400		0	0.232273	0	0	0.134127	0	0	0	0	NoDiff	P2ND	P2ND			0	2	0	0	0	0	0	0	0
LOC_Os01g28550		1.24734	2.53678	3.12885	1.03786	1.5803	2.12838	0.907441	1.95089	1.42882	NoDiff		P2PD			0	0	0	0	0	1	0	0	0
LOC_Os01g28560		0.389441	2.17724	2.03832	0	1.80969	2.4445	0.495941	0.960353	1.45551	NoDiff	P2PD				0	0	0	0	0	1	0	0	0
LOC_Os01g28580		2.51993	7.65871	3.46169	1.48977	5.64221	6.8321	1.78504	5.92172	4.32541		P2PD				0	0	0	0	0	1	0	0	0
LOC_Os01g28660		0.209235	0	0	0.173767	0	0.597527	0.259993	0.331151	0.325311	NoDiff	P1POD	NoDiff			0	0	0	0	0	0	1	0	0
LOC_Os01g28910		0	0	0.452463	0.174326	0.360912	0.443291	0.572143	0	0		NoDiff	CPOD			0	0	0	0	0	0	1	0	1
LOC_Os01g28940		0	0	0	0	0	0	0.042674	0	0.354813	P1POD	NoDiff	NoDiff			0	0	0	0	0	0	1	0	0
LOC_Os01g28970		0	0	0	0.156215	0.161707	0	0	0	0	NoDiff	CNOD	NoDiff			1	0	0	0	0	0	0	1	0
LOC_Os01g28989		73.6126	97.6478	89.645	52.8472	82.0465	97.0792	54.9643	80.2709	85.6598		P2PD	NoDiff			0	0	0	0	0	1	0	0	0
LOC_Os01g29070		0.264301	1.8887	3.34484	0.658497	2.26716	3.57222	0.720399	2.70343	1.64716	NoDiff	P2PD	P2PD			0	0	0	0	0	2	0	0	0
LOC_Os01g29090		0	0	0.283817	0	0	0	0	0	0	NoDiff	NoDiff	CPOD			0	0	0	0	0	0	1	0	1
LOC_Os01g29110		9.7034	2.23438	6.44432	6.66395	1.68978	6.03079	4.30317	1.61865	3.71801	NoDiff		P1MP			0	0	0	1	0	0	0	0	0
LOC_Os01g29140		0	0	0	0.644493	0	1.06977	0.88652	1.81804	5.01893	P2POD	P1POD	NoDiff			0	0	0	0	0	0	2	0	0
LOC_Os01g29180		11.4019	28.6901	23.889	7.40904	28.9353	20.2843	13.3937	23.8548	23.9421		P2MP				0	0	0	1	0	0	0	0	0
LOC_Os01g29210		0	0.512738	0	0	0	0	0	0.911069	0	P2ND	NoDiff	P2ND			0	2	0	0	0	0	0	0	0
LOC_Os01g29450		1.07317	0	0.839951	1.14164	0	0.834309	1.09821	0	0.569048	P1MP	P1MP				0	0	0	2	0	0	0	0	0
LOC_Os01g29469		27.5301	13.6208	32.6751	13.3467	17.2876	19.4317	17.1838	16.4274	19.6656	NoDiff	NoDiff	P1PD			0	0	0	0	0	1	0	0	0
LOC_Os01g29540		0	0	0	0	0.084131	0.248003	0.088914	0	0.084707	NoDiff	P2POD	NoDiff			0	0	0	0	0	0	1	0	0
LOC_Os01g29560		2.06073	0	1.19904	2.16489	0	0.951976	2.22872	0	1.26455	P1MP	P1MP	P1MP			0	0	0	3	0	0	0	0	0
LOC_Os01g29580		0	0	0	0	0	0.083993	0	0	0	NoDiff	CPOD	NoDiff			0	0	0	0	0	0	1	0	1
LOC_Os01g29590		0.401652	0.822513	0.91977	0.330702	0.447358	0.789701	0.447759	0.726877	0.662041	NoDiff	P2POD				0	0	0	0	0	0	1	0	0
LOC_Os01g29610		1.44417	0	5.33361	1.63237	1.0613	1.77333	1.36729	0	1.54152	NoDiff	NoDiff	P1PD			0	0	0	0	0	1	0	0	0
LOC_Os01g29660		0.28592	1.51421	1.97218	0.792124	1.6855	1.29809	0.674013	1.08245	0.68799	NoDiff	NoDiff	P2PD			0	0	0	0	0	1	0	0	0
LOC_Os01g29820		19.7023	24.803	23.803	14.5589	21.0052	24.386	11.2688	16.7498	18.6698		P2PD	NoDiff			0	0	0	0	0	1	0	0	0
LOC_Os01g29830		30.5944	9.46567	37.3518	19.1077	15.563	28.8242	17.3033	11.2614	27.0735	NoDiff	NoDiff	P1PD			0	0	0	0	0	1	0	0	0
LOC_Os01g29880		0.281237	0.209346	0.242485	0.087587	0.181332	0.23757	0.19164	0.123994	0.852009	P1POD	NoDiff	NoDiff			0	0	0	0	0	0	1	0	0
LOC_Os01g29910		3.71455	0	1.71706	3.95226	0	2.23975	3.80059	0	3.33057	P1PD	P1MP	P1MP			0	0	0	2	0	1	0	0	0
LOC_Os01g30940		21.1402	0	1.53287	8.22418	0.450253	17.1986	9.93731	0	3.05023	NoDiff	P1PD				0	0	0	0	0	1	0	0	0
LOC_Os01g30956		7.78354	0.146297	4.17984	7.51316	0.14784	4.14278	8.08598	0.173302	5.69596	P1PPD	P1MP	P1MP			0	0	0	2	1	0	0	0	0
LOC_Os01g30980		0	0.117991	0.410002	0	0.281052	0.100422	0	0.471719	0		NoDiff	P2PD			0	0	0	0	0	1	0	0	0
LOC_Os01g31040		9.92463	2.21245	6.36437	6.54506	1.69598	8.48081	5.22399	1.37831	4.02677	NoDiff	P1PD	P1MP			0	0	0	1	0	1	0	0	0
LOC_Os01g31090		0	0	0	0	0	0	0.113809	0	0	P1ND	NoDiff	NoDiff			0	1	0	0	0	0	0	0	0
LOC_Os01g31170		0	0	0	0	0.495464	0.114702	0	0.255428	0.535423	P2POD		NoDiff			0	0	0	0	0	0	1	0	0
LOC_Os01g31210		0	0	0	0	0	0.362215	0	0	0	NoDiff	CPOD	NoDiff			0	0	0	0	0	0	1	0	1
LOC_Os01g31250		0	0.601132	1.26689	0.740889	1.05172	0.310304	0.564197	1.2031	0.766511	NoDiff	P2ND	P2POD			0	1	0	0	0	0	1	0	0
LOC_Os01g31290		0	0	0.210472	0	0	0	0	0	0	NoDiff	NoDiff	CPOD			0	0	0	0	0	0	1	0	1
LOC_Os01g31300		8.73331	0	0	0	0	14.3113	0	0	0	NoDiff	CPOD	NoDiff			0	0	0	0	0	0	1	0	1
LOC_Os01g31380		0	0	0.13428	0	0	0.065779	0	0.274652	0	P2ND	NoDiff	CPOD			0	1	0	0	0	0	1	0	1
LOC_Os01g31430		0.051976	0	0.134439	0.086329	0	0	0	0	0	NoDiff		P1POD			0	0	0	0	0	0	1	0	0
LOC_Os01g31580		75.1082	54.755	88.5662	62.9221	54.1942	76.5057	47.2633	45.381	52.846	NoDiff		P1PD			0	0	0	0	0	1	0	0	0
LOC_Os01g31650		0	1.48218	0	0	0	0.432406	0	0	0	NoDiff	NoDiff	P2ND			0	1	0	0	0	0	0	0	0
LOC_Os01g31690		2.29925	2.51486	0.728239	0.896295	1.52236	1.03058	0.724756	0.993023	0.324926	NoDiff	NoDiff	P2ND			0	1	0	0	0	0	0	0	0
LOC_Os01g31700		0	0	0	0	0	0	0	0	0.354813	CPOD	NoDiff	NoDiff			0	0	0	0	0	0	1	0	1
LOC_Os01g31780		0	0	0	1.76506	0	1.12742	0	0	1.60043	CPOD	P1MP	NoDiff			0	0	0	1	0	0	1	0	1
LOC_Os01g31850		0	0.176744	0	0	0	0	0	0	0	NoDiff	NoDiff	P2ND			0	1	0	0	0	0	0	0	0
LOC_Os01g32010		6.34354	0.267654	3.61359	6.92757	0.143196	3.24967	6.51271	0	5.25331	P1PPD	P1MP	P1MP			0	0	0	2	1	0	0	0	0
LOC_Os01g32030		0	0	0	0	0	0.457536	0	0	0	NoDiff	CPOD	NoDiff			0	0	0	0	0	0	1	0	1
LOC_Os01g32080		24.9017	27.1526	0	26.7595	0	30.0692	0	31.5249	31.5376			CNOD			1	0	0	0	0	0	0	1	0
LOC_Os01g32090		1.61394	1.94184	16.3508	1.64814	17.7715	2.08378	14.8302	2.35732	1.93721	P1ND	P2ND	P2POD			0	2	0	0	0	0	1	0	0
LOC_Os01g32110		6.68051	3.48914	4.13693	9.15917	1.85633	5.20222	2.76274	0.670423	1.18916	NoDiff	P1MP	NoDiff			0	0	0	1	0	0	0	0	0
LOC_Os01g32250		0.051976	0.206341	0.209128	0.028776	0.208517	0.291231	0.038797	0.122215	0.374901	P2POD	P2PD	NoDiff			0	0	0	0	0	1	1	0	0
LOC_Os01g32320		0.147153	0.483138	0.224301	0.957176	0.361161	1.20369	0.332162	0.533934	0.794525		P1PD	NoDiff			0	0	0	0	0	1	0	0	0
LOC_Os01g32380		0.111223	0.441557	0.38359	0.369477	0.956171	0.563722	0.202106	1.37303	0.770173	P2MP	NoDiff	NoDiff	RH3		0	0	0	1	0	0	0	0	0
LOC_Os01g32460		0.084425	0	0	0.140229	0.07258	0.071317	0.076705	0.595557	0.073076	P2ND	NoDiff	NoDiff	RH2		0	1	0	0	0	0	0	0	0
LOC_Os01g32530		0	0	0.100799	0	0.072585	0.04987	0	0	0	NoDiff	NoDiff	CPOD			0	0	0	0	0	0	1	0	1
LOC_Os01g32550		0	0	0	0	0.0881	0.375125	0.124144	0	0.236542	NoDiff	P2PD	NoDiff			0	0	0	0	0	1	0	0	0
LOC_Os01g32560		11.7991	11.6149	7.09957	11.2548	11.1959	15.7994	14.3054	13.5339	18.6893	P1POD	P1POD	P1NOD			1	0	0	0	0	0	2	0	0
LOC_Os01g32610		0	0	0.167665	0	0	0.246401	0	0	0.056106	NoDiff	CPOD	CPOD			0	0	0	0	0	0	2	0	2
LOC_Os01g32650		0	0	0	0.093004	0	0	0	0.39499	0	P2ND		NoDiff			0	1	0	0	0	0	0	0	0
LOC_Os01g32750		101.781	43.4448	71.5757	58.7134	48.4282	69.695	66.0024	51.0775	61.4737	NoDiff	NoDiff	P1MP			0	0	0	1	0	0	0	0	0
LOC_Os01g32849		16.6973	17.02	23.1045	11.803	14.9937	20.004	11.9675	15.873	17.3408		P2POD	P2POD			0	0	0	0	0	0	2	0	0
LOC_Os01g32864		159.814	36.5588	90.9338	127.717	34.154	87.3247	171.866	65.8821	141.676			P1MP			0	0	0	1	0	0	0	0	0
LOC_Os01g32870		15.9076	3.81831	26.5746	32.0287	22.5311	5.0098	23.5686	18.0395	19.359	NoDiff	P1NOD				1	0	0	0	0	0	0	0	0
LOC_Os01g33020		4.77006	0	17.458	1.38568	13.8012	1.73787	11.3699	15.1638	3.24325	P2ND		P1POD			0	1	0	0	0	0	1	0	0
LOC_Os01g33050		17.1924	6.66324	193.93	9.94655	201.336	14.6439	10.5109	91.3181	1.92899		P2ND	P1POD			0	1	0	0	0	0	1	0	0
LOC_Os01g33110		1.0346	4.17739	2.61395	0.607518	3.49718	1.94891	1.02126	3.5542	2.35496	P2MP	P2MP	P2MP			0	0	0	3	0	0	0	0	0
LOC_Os01g33136		0	0	2.06177	1.59427	2.34117	1.33023	1.51023	0.874283	1.23684	NoDiff	NoDiff	CPOD			0	0	0	0	0	0	1	0	1
LOC_Os01g33230		12.4248	13.3624	16.6813	11.2059	13.8096	12.9828	11.5233	11.0913	11.2773	NoDiff	NoDiff	P2PD			0	0	0	0	0	1	0	0	0
LOC_Os01g33270		1.19957	0.457489	0.612906	0.184487	1.03126	1.25492	0.232104	0.705169	0.692211		P2PD				0	0	0	0	0	1	0	0	0
LOC_Os01g33324		0.054246	0	0.187085	0.067576	0.128191	0.160382	0.083693	0.143498	0.108559	NoDiff	NoDiff	P1PD			0	0	0	0	0	1	0	0	0
LOC_Os01g33450		0.189509	30.9414	8.57558	0	24.6915	15.5105	0.174518	13.0041	10.3438		P2MP	P2MP			0	0	0	2	0	0	0	0	0
LOC_Os01g33514		9.16903	20.2665	20.5768	25.0451	15.6602	18.2642	6.66886	16.702	19.7615	P2PD	NoDiff				0	0	0	0	0	1	0	0	0
LOC_Os01g33590		0	0	0	0.061509	0.042351	0	0.067291	0	0.106847	P1PD		NoDiff			0	0	0	0	0	1	0	0	0
LOC_Os01g33609		0	0	0.498686	0	0.155384	0.061073	0	0	0	NoDiff	NoDiff	CPOD			0	0	0	0	0	0	1	0	1
LOC_Os01g33640		5.32295	2.85676	3.6036	7.28589	1.38977	3.51391	2.74052	0.903962	1.0068	NoDiff	P1MP	NoDiff			0	0	0	1	0	0	0	0	0
LOC_Os01g33740		0	0	0	0.192159	0.230655	0.19998	0	0	0.254451	CPOD	NoDiff	NoDiff			0	0	0	0	0	0	1	0	1
LOC_Os01g33760		0	14.5548	0	0	0	23.823	22.1623	0	0	P1ND	CPOD				0	1	0	0	0	0	1	0	1
LOC_Os01g33960		1.55182	41.5082	12.4616	13.3808	29.3756	9.71873	14.6501	40.6451	12.904	P2ND	P2ND	P2MP			0	2	0	1	0	0	0	0	0
LOC_Os01g33970		2.85343	0	0.873493	2.17083	0	1.5565	2.09681	0	1.18053	P1MP	P1MP	P1NPD			0	0	1	2	0	0	0	0	0
LOC_Os01g34050		0	0.108174	0	0	0	0	0	0	0	NoDiff	NoDiff	P2ND			0	1	0	0	0	0	0	0	0
LOC_Os01g34140		3.48192	1.54032	1.99775	5.11253	0.787539	2.42425	1.39696	0.648974	0.771816	NoDiff	P1MP				0	0	0	1	0	0	0	0	0
LOC_Os01g34200		41.9201	30.1539	22.5007	28.5413	18.3626	24.6291	34.4023	24.7348	35.0625		NoDiff	P1ND			0	1	0	0	0	0	0	0	0
LOC_Os01g34430		13.3475	7.7495	11.1571	8.03616	8.80264	14.2914	8.0328	4.38918	6.97916	NoDiff	P2POD				0	0	0	0	0	0	1	0	0
LOC_Os01g34460		0	0	0.384246	0	0	0	0	0	0.096436	NoDiff	NoDiff	CPOD			0	0	0	0	0	0	1	0	1
LOC_Os01g34480		108.019	59.4766	53.77	72.2428	58.8443	62.1265	82.6913	37.3568	37.5778	P1ND	NoDiff	P1ND			0	2	0	0	0	0	0	0	0
LOC_Os01g34590		0	7.51116	4.66078	0.064133	11.7051	7.24088	0	12.4782	8.1548	P2MP	P2MP				0	0	0	2	0	0	0	0	0
LOC_Os01g34660		6.80495	15.689	14.4796	6.30889	14.2974	12.9354	4.15118	12.9116	8.00486	P2MP					0	0	0	1	0	0	0	0	0
LOC_Os01g34750		0	0	0.364586	0.52062	0.339813	0.184483	0	0	0	NoDiff		CPOD			0	0	0	0	0	0	1	0	1
LOC_Os01g34760		0	0	0	0	0	0.116399	0	0	0	NoDiff	CPOD	NoDiff			0	0	0	0	0	0	1	0	1
LOC_Os01g34770		1.60061	1.59169	3.55134	1.28605	1.87044	3.03159	1.90665	1.8079	1.30229	NoDiff		P1POD			0	0	0	0	0	0	1	0	0
LOC_Os01g34780		45.9644	21.9131	39.4145	32.7245	19.6301	44.6932	29.5824	16.367	19.91	NoDiff	P1POD				0	0	0	0	0	0	1	0	0
LOC_Os01g34830		0.23174	5.55931	2.19788	0	5.55607	4.52537	0	5.64181	3.2094	P2MP		P2MP			0	0	0	2	0	0	0	0	0
LOC_Os01g34980		0	0	0	0	0.093323	0.074603	0.036776	0	0.152886	P1POD	NoDiff	NoDiff			0	0	0	0	0	0	1	0	0
LOC_Os01g35300		0.188644	0	0.325301	0.078334	0	0.079678	0.342789	0	0	P1ND	NoDiff	P1PD			0	1	0	0	0	1	0	0	0
LOC_Os01g35400		0.599644	3.10794	4.60176	1.32936	3.07267	5.25385	1.38298	3.05975	2.85605	NoDiff	P2PD	P2PD			0	0	0	0	0	2	0	0	0
LOC_Os01g35410		0	0	0.246585	0	0	0.400187	0	0	0.128216	NoDiff	CPOD	NoDiff			0	0	0	0	0	0	1	0	1
LOC_Os01g35440		0	0	0	0.447675	0	0.619529	0.934447	0	0	P1ND		NoDiff			0	1	0	0	0	0	0	0	0
LOC_Os01g35450		0.460205	0.492364	0.625475	0.652808	0.284921	0.850441	1.3181	0.437435	0.849866	P1MP	P1PD	NoDiff			0	0	0	1	0	1	0	0	0
LOC_Os01g35520		0	0	0.988853	0	0	0.723734	0	0	0.940968	CPOD	NoDiff	CPOD			0	0	0	0	0	0	2	0	2
LOC_Os01g35530		0.813412	1.40945	3.59308	1.641	1.8478	3.66453	0.796639	1.08747	1.68031	NoDiff	P2POD	P2POD			0	0	0	0	0	0	2	0	0
LOC_Os01g35550		0.317934	1.26221	0.548251	0.70411	0	1.68654	0.38515	0.747593	0.733856	NoDiff	P1PD	NoDiff			0	0	0	0	0	1	0	0	0
LOC_Os01g35560		0	0	0	0.081828	0	0.040685	0	0	0	NoDiff	P1MP	NoDiff			0	0	0	1	0	0	0	0	0
LOC_Os01g35600		3.43559	5.59575	5.04404	7.97289	4.57795	12.1133	5.02144	1.37625	4.80406	NoDiff	P1PD	NoDiff			0	0	0	0	0	1	0	0	0
LOC_Os01g35650		1.16149	0.400222	0.501189	0.389726	0	0.753779	0.608791	0	0.403178	NoDiff	P1PD				0	0	0	0	0	1	0	0	0
LOC_Os01g35670		0.279221	1.19739	1.49221	1.12362	0.817407	1.79273	1.20706	1.27341	1.46915	NoDiff	P1PD				0	0	0	0	0	1	0	0	0
LOC_Os01g35680		0	0	0.494427	0	0	0.353973	0	0	0.624425	CPOD	CPOD	CPOD			0	0	0	0	0	0	3	0	3
LOC_Os01g35720		0	0	0.101749	0	0.111596	0.099686	0	0.083247	0.081716	NoDiff		CPOD			0	0	0	0	0	0	1	0	1
LOC_Os01g35789		2.65859	45.0765	30.0283	2.27162	43.4495	33.2039	2.25305	34.6461	27.5738			P2MP			0	0	0	1	0	0	0	0	0
LOC_Os01g35830		14.4606	56.7416	43.2487	7.98634	55.2627	45.7817	0	69.2164	49.8404	P2PPD	P2PD	P2MP			0	0	0	1	1	1	0	0	0
LOC_Os01g35930		0	44.9908	38.2288	0	54.0811	40.5842	0	53.0462	28.4597	P2MP					0	0	0	1	0	0	0	0	0
LOC_Os01g36070		8.2913	8.89779	6.95971	6.58279	7.28142	5.21195	6.1601	4.26015	11.3153	P1POD	NoDiff	NoDiff			0	0	0	0	0	0	1	0	0
LOC_Os01g36240		1.87353	11.4923	7.05299	0.29538	12.9292	6.02348	0.242361	8.09824	3.276		P2MP	P2MP			0	0	0	2	0	0	0	0	0
LOC_Os01g36294		0.813783	0	0.574077	1.59743	0	0.562442	1.00823	0	0.224123		P1MP				0	0	0	1	0	0	0	0	0
LOC_Os01g36390		35.6207	28.3913	55.8477	37.3932	22.7436	43.3836	23.9222	33.8079	27.873	NoDiff	NoDiff	P1PD			0	0	0	0	0	1	0	0	0
LOC_Os01g36420		1.50136	0.745052	2.09063	1.9253	0.300405	0.988486	0.541617	0.233623	0.171997	NoDiff		P1PD			0	0	0	0	0	1	0	0	0
LOC_Os01g36590		0	0	0.372903	0.260774	0	0	0.246476	0	0.208433	NoDiff	NoDiff	CPOD			0	0	0	0	0	0	1	0	1
LOC_Os01g36600		27.737	17.4651	30.7349	25.2286	24.7358	35.693	29.7082	19.8352	26.0909		P1POD	P1PD			0	0	0	0	0	1	1	0	0
LOC_Os01g36610		8.19257	6.90011	10.4066	7.94473	7.59967	9.37082	6.86688	9.04907	7.5408	NoDiff	NoDiff	P1PD			0	0	0	0	0	1	0	0	0
LOC_Os01g36670		23.511	23.0915	30.3741	19.0047	21.615	25.5467	17.3965	25.4055	22.9653			P1POD			0	0	0	0	0	0	1	0	0
LOC_Os01g36720		0	0	0	0.068866	0	0.140093	0	1.16129	0	P2ND	P1POD	NoDiff	OsNRT2.4		0	1	0	0	0	0	1	0	0
LOC_Os01g36750		1.18799	0	1.04648	2.01596	0.417368	1.10891	1.30123	0	0.945506	P1MP	P1MP	P1PD			0	0	0	2	0	1	0	0	0
LOC_Os01g36772		0	0	0	0.62486	0	0.354976	0	0	0.235927	CPOD	P1MP	NoDiff			0	0	0	1	0	0	1	0	1
LOC_Os01g36800		1.52152	0.496709	0.374432	1.52867	0.408844	0.866538	0.958395	0	1.45562	P1PD		P1ND			0	1	0	0	0	1	0	0	0
LOC_Os01g36820		76.6781	0.27066	34.2775	50.8932	0	24.2502	52.7377	0.961862	27.6207	P1MP	P1MP	P1NPD			0	0	1	2	0	0	0	0	0
LOC_Os01g36920		221.793	167.662	98.412	185.189	115.899	119.672	140.014	80.4245	133.869			P1NOD	OsAIP2		1	0	0	0	0	0	0	0	0
LOC_Os01g36930		45.5014	27.1126	37.6084	25.6054	35.6761	66.6042	30.7315	18.9797	41.1042	P1PD	P2POD	NoDiff			0	0	0	0	0	1	1	0	0
LOC_Os01g37040		0	0	0	0	0.081857	0.12065	0	0	0.206045	CPOD		NoDiff			0	0	0	0	0	0	1	0	1
LOC_Os01g37100		0.098305	1.66363	0.478818	0	2.67634	1.2597	0.133974	3.06714	0.795052	P2NPD	P2MP				0	0	1	1	0	0	0	0	0
LOC_Os01g37180		0	0.121824	0	0	0.237422	0.174968	0	0	0.843306	CPOD	NoDiff	NoDiff			0	0	0	0	0	0	1	0	1
LOC_Os01g37200		0	0	0	0.256128	0	0.347361	0	0	0.444915	CPOD	NoDiff	NoDiff			0	0	0	0	0	0	1	0	1
LOC_Os01g37240		0.588882	0.70971	1.29655	0.751056	0.742432	1.26509	0.735671	0.890164	1.00124	NoDiff	P1POD	P2POD			0	0	0	0	0	0	2	0	0
LOC_Os01g37250		0	0	0.253134	0.097528	0.100957	0.124002	0.106696	0	0.050824	NoDiff	NoDiff	CPOD			0	0	0	0	0	0	1	0	1
LOC_Os01g37260		0.107374	36.1078	16.2482	0.089173	27.6795	14.3752	0	22.0143	15.6169		P2MP	P2MP			0	0	0	2	0	0	0	0	0
LOC_Os01g37280		0.317162	14.8791	15.7973	0.148162	17.5461	17.0327	0.10806	9.0847	7.12068	NoDiff	P2PD	P2PD			0	0	0	0	0	2	0	0	0
LOC_Os01g37390		0.558238	0	0	0.743076	0.910002	0.31179	0	0.878454	0.337466		P2ND				0	1	0	0	0	0	0	0	0
LOC_Os01g37430		0	0	0.108039	0	0	0	0.060272	0	0	NoDiff	NoDiff	CPOD			0	0	0	0	0	0	1	0	1
LOC_Os01g37570		0.238219	2.10619	3.92652	0.884553	2.53314	4.10532	0.735881	2.66139	1.81849	NoDiff	P2PD	P2PD			0	0	0	0	0	2	0	0	0
LOC_Os01g37610		0.588852	8.81059	6.10449	0.566251	5.68842	4.7386	0.380136	3.96259	2.76532	NoDiff		P2MP			0	0	0	1	0	0	0	0	0
LOC_Os01g37690		71.7613	54.5104	55.6443	53.3509	70.3183	75.5797	65.05	85.249	72.9369	NoDiff	P2PD		OsCAX1a		0	0	0	0	0	1	0	0	0
LOC_Os01g37750		0.185337	0.122632	0	0.102613	0.106221	0.104373	0.112259	0	0.26737	P1PD	NoDiff	NoDiff			0	0	0	0	0	1	0	0	0
LOC_Os01g37760		14.0644	17.4094	20.333	19.542	11.2568	18.3248	14.8428	12.1678	12.1811	NoDiff		P2PD			0	0	0	0	0	1	0	0	0
LOC_Os01g37770		22.4619	14.59	22.0968	13.9709	17.8905	20.9923	17.6313	11.5808	15.695	NoDiff	P2PD				0	0	0	0	0	1	0	0	0
LOC_Os01g37810		0	0	0.339038	0.081641	0.253537	0	0.178632	0.267275	0.085091	NoDiff		CPOD			0	0	0	0	0	0	1	0	1
LOC_Os01g37825		34.7373	22.2933	27.9238	33.3529	26.2954	26.4749	30.9432	23.907	36.3835	P1PD	NoDiff	NoDiff			0	0	0	0	0	1	0	0	0
LOC_Os01g37832		78.65	56.1234	69.6405	81.9307	55.8471	71.6523	53.8703	44.0299	73.9144	P1POD	NoDiff	NoDiff			0	0	0	0	0	0	1	0	0
LOC_Os01g37837		47.7568	35.6935	53.3134	32.581	33.3454	48.0669	40.0286	21.746	29.5332	NoDiff	P2POD				0	0	0	0	0	0	1	0	0
LOC_Os01g37880		0.248766	1.8319	0.279335	0.241029	1.0366	0.936133	0.470871	0.972628	0.632936	NoDiff	NoDiff	P2ND			0	1	0	0	0	0	0	0	0
LOC_Os01g38110		0	0	0.057994	0	0	0	0	0	0	NoDiff	NoDiff	CPOD			0	0	0	0	0	0	1	0	1
LOC_Os01g38244		13.2055	17.8848	21.6835	8.99869	8.41113	19.7782	7.07628	10.4307	17.2708	P2PD	P1POD				0	0	0	0	0	1	1	0	0
LOC_Os01g38440	1	4.29433	4.41484	3.50329	3.30132	2.87708	5.33945	4.93934	2.45576	4.99891		P1PD	NoDiff			0	0	0	0	0	1	0	0	0
LOC_Os01g38580		0	0	0	0	0	0.097662	0	0	0.370831	CPOD	NoDiff	NoDiff			0	0	0	0	0	0	1	0	1
LOC_Os01g38960		0.017298	0	0	0	0	0.075493	0	0.071178	0.054898		CPOD	NoDiff			0	0	0	0	0	0	1	0	1
LOC_Os01g38990		43.6681	42.4807	57.95	42.2644	45.7191	47.3556	43.7453	47.6856	37.0609	NoDiff	NoDiff	P1POD			0	0	0	0	0	0	1	0	0
LOC_Os01g39030		0	0	0.241703	0	0.120498	0.118402	0	0	0	NoDiff	NoDiff	CPOD			0	0	0	0	0	0	1	0	1
LOC_Os01g39110	1	42.6296	35.8556	28.4352	32.0746	28.4289	33.5559	36.5128	38.2537	38.9001	NoDiff	NoDiff	P1ND			0	1	0	0	0	0	0	0	0
LOC_Os01g39120		0	88.8419	192.379	150.417	120.456	200.329	139.739	0	102.583	NoDiff	NoDiff	P2PD			0	0	0	0	0	1	0	0	0
LOC_Os01g39134		57.5012	41.1034	53.2375	33.9648	35.355	46.4652	52.5995	23.1365	48.1233		P2POD				0	0	0	0	0	0	1	0	0
LOC_Os01g39310		31.9762	41.1409	40.9532	37.3844	39.9875	47.6313	26.9226	21.7368	46.0336	P1POD	NoDiff	NoDiff			0	0	0	0	0	0	1	0	0
LOC_Os01g39360		0.759917	0.605266	1.74645	1.0937	0.826832	1.49913	1.16741	0.85667	1.21591	NoDiff	NoDiff	P1PD			0	0	0	0	0	1	0	0	0
LOC_Os01g39385		0	0.041322	0	0.025932	0	0.017585	0.009456	0	0.054055	P1POD		P2ND			0	1	0	0	0	0	1	0	0
LOC_Os01g39500		14.6828	19.1069	26.1623	26.8888	17.8471	26.2488	16.811	12.6224	22.587	P1POD		P2POD			0	0	0	0	0	0	2	0	0
LOC_Os01g39630		14.1044	9.55311	11.6664	5.62695	8.76278	12.2841	8.97129	8.65444	8.81645	NoDiff	P2PD	NoDiff	OsRAD51C		0	0	0	0	0	1	0	0	0
LOC_Os01g39650		2.39603	3.16755	2.80707	2.28399	0	3.25915	1.12897	1.11792	2.81293	NoDiff	P1PD	NoDiff			0	0	0	0	0	1	0	0	0
LOC_Os01g39770		6.57413	2.1616	3.67101	4.18067	5.57202	1.69089	1.42235	1.9055	6.32606	P2POD	P2ND				0	1	0	0	0	0	1	0	0
LOC_Os01g39800		2.26164	14.8703	17.267	10.283	11.0635	5.98146	13.2359	9.98723	1.51957	P1NOD	NoDiff	P2PD			1	0	0	0	0	1	0	0	0
LOC_Os01g39820		0	0	0	0	0.07401	0	0	0.284322	0.110578	P2MP	NoDiff	NoDiff			0	0	0	1	0	0	0	0	0
LOC_Os01g39830		55.5531	35.3367	31.9788	37.6433	30.9638	33.182	38.9092	34.8434	38.8085	NoDiff	NoDiff	P1ND			0	1	0	0	0	0	0	0	0
LOC_Os01g39860		24.705	6.7626	17.475	20.4742	34.3347	27.7415	31.4772	34.2684	47.9719	P2POD	NoDiff		OsACO7		0	0	0	0	0	0	1	0	0
LOC_Os01g39920		0.406845	5.44114	3.0606	0.254819	5.44897	5.81098	0.60375	8.11066	4.11874	P2MP		NoDiff			0	0	0	1	0	0	0	0	0
LOC_Os01g40010		0.057172	0.170232	0.246472	0.154313	0.307191	0.21733	0	0.15124	0.272179	P2PD	NoDiff				0	0	0	0	0	1	0	0	0
LOC_Os01g40094		93.0734	84.6739	80.4581	69.539	64.2108	71.7205	57.5533	60.3865	76.8173	P2POD	NoDiff	NoDiff			0	0	0	0	0	0	1	0	0
LOC_Os01g40120		18.7651	7.17838	9.2833	14.7344	6.54233	15.6653	10.2083	7.65141	8.31246	NoDiff	P1PD				0	0	0	0	0	1	0	0	0
LOC_Os01g40290		0	0	0	0.200972	0	0	0	0	0	NoDiff	P1ND	NoDiff			0	1	0	0	0	0	0	0	0
LOC_Os01g40340		16.4097	61.1082	87.7994	80.8983	55.7392	73.1457	12.769	62.6771	70.5655	P2PD	NoDiff	P2POD			0	0	0	0	0	1	1	0	0
LOC_Os01g40560		0	0.287692	0	0	0.350071	0	0.31338	0.26607	0.423423		P2ND	P2ND			0	2	0	0	0	0	0	0	0
LOC_Os01g40590		139.312	98.9379	107.38	118.502	97.2934	132.35	124.706	90.1032	113.033		P1PD				0	0	0	0	0	1	0	0	0
LOC_Os01g40630		13.8841	7.60994	11.4604	16.1228	15.6697	23.8073	20.6912	21.8322	28.7549	P2PD	P1POD	NoDiff	LOG	LOG	0	0	0	0	0	1	1	0	0
LOC_Os01g40690		158.86	127.46	125.376	105.619	92.7157	4.67274	93.8677	86.0089	105.139	NoDiff	P1NOD	NoDiff			1	0	0	0	0	0	0	0	0
LOC_Os01g40750		9.94088	97.7789	64.0871	6.82047	84.7177	50.974	7.81783	85.0193	55.6712	P2MP	P2MP	P2MP			0	0	0	3	0	0	0	0	0
LOC_Os01g40790		9.15178	0	39.1165	12.3418	0	20.259	8.37142	0	0	NoDiff	NoDiff	P1POD			0	0	0	0	0	0	1	0	0
LOC_Os01g40820		0.277317	30.0694	18.4668	0	33.8917	18.227	0.105971	29.9075	21.3323	P2PPD	P2MP	P2MP			0	0	0	2	1	0	0	0	0
LOC_Os01g40860		6.58425	3.13258	2.85137	2.87656	5.21462	8.65152	3.65152	5.22465	5.69804	NoDiff	P2POD		OsALDH2C4; ALDH1a,OsALDH2-1		0	0	0	0	0	0	1	0	0
LOC_Os01g40980		16.3331	6.8509	14.6683	11.4365	4.8511	10.6705	12.9777	4.69645	8.39628	P1MP		P1PD			0	0	0	1	0	1	0	0	0
LOC_Os01g41310		43.5319	28.2922	37.3303	29.6396	24.1001	32.132	38.7261	39.6692	37.9781	NoDiff		P1MP			0	0	0	1	0	0	0	0	0
LOC_Os01g41516		0.236147	2.30771	1.75025	1.21065	1.59092	1.68216	1.12228	2.05025	2.73192	P2PD	NoDiff				0	0	0	0	0	1	0	0	0
LOC_Os01g41610		99.2519	78.714	7.06708	11.4919	62.3309	13.0434	65.9205	70.7348	71.1381	NoDiff	NoDiff	P1NOD			1	0	0	0	0	0	0	0	0
LOC_Os01g41630		24.3619	18.2219	32.0883	26.1327	27.4899	25.7609	24.8391	19.8752	23.6759	NoDiff	NoDiff	P1PD			0	0	0	0	0	1	0	0	0
LOC_Os01g41690		4.54525	7.57676	6.30745	3.93985	6.35554	8.65846	4.60414	5.65724	5.98666	NoDiff	P2PD	NoDiff			0	0	0	0	0	1	0	0	0
LOC_Os01g41710		2.90025	2.19813	1.45491	1.57656	2.03999	1.6036	4.16817	3.25484	3.37761	NoDiff	NoDiff	P1ND			0	1	0	0	0	0	0	0	0
LOC_Os01g41730		0.517045	0	0	0.547265	0.646543	0	0.59765	0	1.25131	P1PD	NoDiff	NoDiff			0	0	0	0	0	1	0	0	0
LOC_Os01g41810		0.405327	0	0	0.605609	0.801447	0	0.460583	0	1.46479	P1POD	CNOD				1	0	0	0	0	0	1	1	0
LOC_Os01g41870		35.2382	32.2601	43.8374	38.3226	28.4861	13.1161	38.5324	37.7891	47.4321	NoDiff	P1ND	NoDiff			0	1	0	0	0	0	0	0	0
LOC_Os01g41880		77.7556	35.4111	47.7453	59.244	40.7237	60.1886	129.347	50.699	96.2004	P1MP	NoDiff				0	0	0	1	0	0	0	0	0
LOC_Os01g41900	1	5.09741	4.82331	1.96439	2.94997	5.10581	3.81218	4.21393	8.39467	6.11804	NoDiff	NoDiff	P1NOD			1	0	0	0	0	0	0	0	0
LOC_Os01g42020		0	0	0.465128	0	0	0	0	0	0	NoDiff	NoDiff	CPOD			0	0	0	0	0	0	1	0	1
LOC_Os01g42340		0.061808	0.061346	0.053292	0.025666	0.026568	0.078317	0.084235	0	0.02675		P2POD	NoDiff			0	0	0	0	0	0	1	0	0
LOC_Os01g42350		0.038533	0	0.050628	0	0.075719	0.081735	0	0.085931	0	P2ND	P2PD				0	1	0	0	0	1	0	0	0
LOC_Os01g42480		36.3753	20.4444	22.1431	29.7358	24.0541	9.78141	32.7978	25.7232	32.2248	NoDiff	P1NOD				1	0	0	0	0	0	0	0	0
LOC_Os01g42520		9.08796	7.91816	4.1272	5.07004	7.54443	7.9406	5.57817	8.19706	6.39512	NoDiff	NoDiff	P1NOD			1	0	0	0	0	0	0	0	0
LOC_Os01g42700		15.9354	123.851	142.104	11.2582	8.76345	147.965	126.571	121.279	123.593	NoDiff	P1POD				0	0	0	0	0	0	1	0	0
LOC_Os01g42780		0	0	0	0	0	0.552651	0	0	0.220344	NoDiff	CPOD	NoDiff			0	0	0	0	0	0	1	0	1
LOC_Os01g42820		42.8438	36.7475	38.5983	18.9042	15.3389	46.0727	23.8905	23.8847	26.9325	NoDiff	P1POD	NoDiff			0	0	0	0	0	0	1	0	0
LOC_Os01g42840		0.334199	0	0	0	0	0.106699	0.114761	0	0		CPOD	P1ND			0	1	0	0	0	0	1	0	1
LOC_Os01g42900		1.17789	0.324739	0.169264	0.675361	0.562566	0.352973	0.356728	0.115405	0.283209	NoDiff	NoDiff	P1ND			0	1	0	0	0	0	0	0	0
LOC_Os01g42950		55.6859	51.4276	63.4116	51.3984	43.0717	3.52638	3.69047	44.8008	53.6881	P2PD	P1NOD	NoDiff			1	0	0	0	0	1	0	0	0
LOC_Os01g42990		8.60988	5.49017	2.90126	4.99268	4.67882	7.537	7.35597	8.28399	7.33085	NoDiff	NoDiff	P1ND			0	1	0	0	0	0	0	0	0
LOC_Os01g43010	1	1.26666	0.412946	0.309877	1.15263	0.795511	1.25622	1.47461	1.53927	1.08527	NoDiff	NoDiff	P1ND			0	1	0	0	0	0	0	0	0
LOC_Os01g43230	1	9.80531	10.9096	1.00274	7.7563	7.1627	1.56766	8.56356	8.68751	8.64383	NoDiff	NoDiff	P2NOD			1	0	0	0	0	0	0	0	0
LOC_Os01g43250		26.5669	16.7671	13.8634	21.5848	21.791	19.1339	24.0239	15.3757	16.4524		NoDiff	P1ND			0	1	0	0	0	0	0	0	0
LOC_Os01g43260		0	0	0	0	1.59554	0	0.297572	0	0	NoDiff	P2ND	NoDiff			0	1	0	0	0	0	0	0	0
LOC_Os01g43270		0	0.089658	0	0	0	0	0	0	0.117287	CPOD	NoDiff	P2ND			0	1	0	0	0	0	1	0	1
LOC_Os01g43280		0.097912	0.25914	0.05628	0.05421	0.196405	0.165418	0.059306	0.518019	0.621499	P2PD	NoDiff	NoDiff			0	0	0	0	0	1	0	0	0
LOC_Os01g43290		1.87969	2.37295	0.642762	0.910985	0.984215	1.08629	0.522501	2.16926	1.42651	NoDiff	NoDiff	P2ND			0	1	0	0	0	0	0	0	0
LOC_Os01g43310		0	0	0	0	0.168263	0	0	0	0	NoDiff	P2ND	NoDiff			0	1	0	0	0	0	0	0	0
LOC_Os01g43420		24.8352	13.6787	12.5624	13.3959	14.1732	13.406	13.195	12.2936	13.8297	NoDiff	NoDiff	P1ND			0	1	0	0	0	0	0	0	0
LOC_Os01g43480		37.3537	18.8236	30.5014	35.4069	28.5797	13.7654	11.086	22.8903	13.7192	NoDiff	P1NOD	NoDiff			1	0	0	0	0	0	0	0	0
LOC_Os01g43500		0	0	0	0	0.859243	0.27976	0	1.57285	0.650695	P2MP		NoDiff			0	0	0	1	0	0	0	0	0
LOC_Os01g43520		33.2285	34.0516	62.2821	35.4632	25.9479	22.777	26.6285	23.5543	29.2573	NoDiff		P2POD			0	0	0	0	0	0	1	0	0
LOC_Os01g43720		0.130288	0	0	0.162304	0.196012	0.082544	1.15188	0.746752	1.12774	P1PD	NoDiff				0	0	0	0	0	1	0	0	0
LOC_Os01g43870		17.0464	17.9981	24.4021	13.0635	15.3209	17.6964	10.9807	15.7245	15.9233			P2POD			0	0	0	0	0	0	1	0	0
LOC_Os01g43930		0	0.090315	0.353062	0.18893	0.078229	0.038434	0	0	0.059074	NoDiff	NoDiff	P2POD			0	0	0	0	0	0	1	0	0
LOC_Os01g43950		15.1355	9.316	16.7171	11.9965	6.11085	13.7766	10.9718	4.03488	11.1681		P1PD	P1PD			0	0	0	0	0	2	0	0	0
LOC_Os01g43980		0	0.059855	0	0	0.038884	0.089151	0	0.106355	0	P2ND	P2POD				0	1	0	0	0	0	1	0	0
LOC_Os01g44050		10.7534	10.7886	7.23995	8.38937	8.82808	7.96809	7.80315	8.86166	8.77159	NoDiff	NoDiff	P2NOD			1	0	0	0	0	0	0	0	0
LOC_Os01g44120		0	0.148197	0	0	0.320914	0.252264	0.339157	0.131664	0.5816	P1POD					0	0	0	0	0	0	1	0	0
LOC_Os01g44130		0.461035	0.382996	0.131812	0.160238	0.099524	0	0.105181	0	0	NoDiff	NoDiff	P1NOD			1	0	0	0	0	0	0	0	0
LOC_Os01g44150		0	0	0	0	0	0.071256	0.053277	0	0.087078	P1PD	CPOD	NoDiff			0	0	0	0	0	1	1	0	1
LOC_Os01g44200		0.555503	0	0.692561	0.724978	0	0.547544	0.797036	0	0.295574	P1MP		P1PD			0	0	0	1	0	1	0	0	0
LOC_Os01g44970		46.7165	34.9172	51.8261	42.8501	38.8423	32.944	41.8187	40.9848	48.9354	NoDiff		P1PD			0	0	0	0	0	1	0	0	0
LOC_Os01g44990		14.8034	3.90579	8.4267	10.4095	12.399	9.87467	4.68207	3.00317	5.28823	NoDiff	NoDiff	P1MP			0	0	0	1	0	0	0	0	0
LOC_Os01g45030		1.55212	4.75503	5.5729	4.20139	3.16939	4.95047	4.55957	4.28015	5.26828	NoDiff	NoDiff	P2PD			0	0	0	0	0	1	0	0	0
LOC_Os01g45050		0.59522	8.25239	5.62214	0.650425	4.96891	4.31351	0.469636	3.34213	2.59055			P2MP			0	0	0	1	0	0	0	0	0
LOC_Os01g45060		29.7087	26.4153	50.0476	29.9258	26.5336	26.683	28.1251	31.336	29.8163	NoDiff	NoDiff	P1POD			0	0	0	0	0	0	1	0	0
LOC_Os01g45310		0.491892	0	0.290267	0	0.117376	0.186429	0.147838	0	0.369108	P1PD	NoDiff				0	0	0	0	0	1	0	0	0
LOC_Os01g45450		0.464943	0	0	0.105308	0.254359	0.738616	0.499233	0.298165	0.219514	NoDiff	P2POD				0	0	0	0	0	0	1	0	0
LOC_Os01g45520		1.03112	2.59206	3.83627	3.01024	1.99575	2.99582	2.78606	2.01756	3.06239	NoDiff	NoDiff	P2PD			0	0	0	0	0	1	0	0	0
LOC_Os01g45540		0	0	0	0	0.109223	0.64394	0.230865	0.224059	0.219943	NoDiff	P2POD	NoDiff			0	0	0	0	0	0	1	0	0
LOC_Os01g45650		0	0.113786	0	0	0	0	0	0	0	NoDiff	NoDiff	P2ND			0	1	0	0	0	0	0	0	0
LOC_Os01g45659		0	0	0	0	0	0.283798	0.406988	0	0.096933		CPOD	NoDiff			0	0	0	0	0	0	1	0	1
LOC_Os01g45810		5.96011	5.4634	6.1123	5.46487	5.02579	8.18573	6.31993	4.97362	6.49649	NoDiff	P1PD	NoDiff			0	0	0	0	0	1	0	0	0
LOC_Os01g45830		0.255452	0.217316	0.125857	0.272763	0.156863	0.462404	0.397873	0.514861	0.473812	NoDiff	P1POD	NoDiff			0	0	0	0	0	0	1	0	0
LOC_Os01g45914		1.62088	5.08021	2.20664	1.77122	7.554	4.54002	0.775089	2.70807	3.02752		P2MP				0	0	0	1	0	0	0	0	0
LOC_Os01g45970		19.9598	12.6577	19.376	18.5786	13.5027	21.3775	20.8879	15.1541	19.1049	NoDiff	P1PD				0	0	0	0	0	1	0	0	0
LOC_Os01g45990		5.93844	5.77643	8.92125	7.23253	6.76593	6.75873	2.78136	5.13458	6.76758	P2PD	NoDiff	P1POD	OsAKT1	OsAKT1	0	0	0	0	0	1	1	0	0
LOC_Os01g46000		0.027074	0.247372	0.358164	0.034499	0.214269	0.269026	0	0.146516	0.263679	P2PD		P2PD			0	0	0	0	0	2	0	0	0
LOC_Os01g46030		0	0	0.289855	0	0.244239	0.14199	0	0.369485	0		NoDiff	CPOD			0	0	0	0	0	0	1	0	1
LOC_Os01g46340		5.52796	3.41	2.82722	2.87101	3.73601	3.90471	5.79438	8.32027	7.98077		NoDiff	P1ND			0	1	0	0	0	0	0	0	0
LOC_Os01g46350		6.43961	4.41462	0	5.35399	0	4.84699	6.78795	8.68632	8.42761	NoDiff		P1ND			0	1	0	0	0	0	0	0	0
LOC_Os01g46470		2.73267	2.78956	2.65365	2.80826	2.79129	5.0931	3.07942	2.63787	3.66603	NoDiff	P1POD	NoDiff			0	0	0	0	0	0	1	0	0
LOC_Os01g46500		31.5414	37.3851	30.075	36.4252	28.9654	34.2314	30.9797	26.9192	7.08285	P1NOD	NoDiff	NoDiff			1	0	0	0	0	0	0	0	0
LOC_Os01g46590		31.3788	21.3651	24.514	21.576	17.2091	28.2034	20.6864	17.7514	14.8875	NoDiff	P1PD				0	0	0	0	0	1	0	0	0
LOC_Os01g46610		209.512	207.882	294.798	292.186	174.771	272.251	243.269	146.985	234.77			P1POD			0	0	0	0	0	0	1	0	0
LOC_Os01g46760		62.8743	75.488	71.9216	73.9095	129.73	147.753	83.7095	123.713	154.745	P2PD	P2PD	NoDiff			0	0	0	0	0	2	0	0	0
LOC_Os01g46770		3.29495	6.85173	5.47648	3.19547	5.79639	7.82958	3.84518	5.25425	5.26744	NoDiff	P2PD	NoDiff			0	0	0	0	0	1	0	0	0
LOC_Os01g46910		0	0	0	0	0	0	0	0	0.148461	CPOD	NoDiff	NoDiff			0	0	0	0	0	0	1	0	1
LOC_Os01g46940		0	0	0	0	0	0	0	0.269818	0	P2ND	NoDiff	NoDiff			0	1	0	0	0	0	0	0	0
LOC_Os01g46984		6.53873	7.60607	6.32601	3.34974	11.346	6.84479	9.36187	12.8285	11.9457		P2MP	NoDiff	Osa-miR319a		0	0	0	1	0	0	0	0	0
LOC_Os01g47030		3.26097	6.90989	5.89943	3.0241	5.44774	7.3271	3.75836	4.73196	4.93997	NoDiff	P2PD	NoDiff			0	0	0	0	0	1	0	0	0
LOC_Os01g47090		0	0	0.1338	0	0	0.065544	0	0	0	NoDiff	NoDiff	CPOD			0	0	0	0	0	0	1	0	1
LOC_Os01g47180		54.9935	41.1631	35.6066	31.6748	34.7969	38.735	49.0072	55.7309	54.1033	NoDiff	NoDiff	P1ND			0	1	0	0	0	0	0	0	0
LOC_Os01g47230		0	0	0.639838	0	0.529535	0	0	1.08326	0	P2ND		CPOD			0	1	0	0	0	0	1	0	1
LOC_Os01g47250		3.35502	4.31041	3.81832	2.83794	3.33194	5.04509	3.12946	3.80624	3.92347	NoDiff	P2PD	NoDiff			0	0	0	0	0	1	0	0	0
LOC_Os01g47256		0.521277	0.498108	23.6766	0.429398	0.580172	1.21375	0.451014	16.3689	0.67469		NoDiff	P1POD			0	0	0	0	0	0	1	0	0
LOC_Os01g47340		28.0957	29.423	23.2417	22.4212	23.309	27.422	20.1729	20.2695	80.802	P2POD	NoDiff	NoDiff			0	0	0	0	0	0	1	0	0
LOC_Os01g47350		10.3772	23.9531	6.08919	19.6233	6.99684	18.3623	4.24087	5.77446	4.74523	NoDiff		P2ND			0	1	0	0	0	0	0	0	0
LOC_Os01g47400		23.3453	32.8413	31.8852	20.9411	18.0032	34.8485	10.6404	21.8733	33.1106	P2POD	P1POD	NoDiff			0	0	0	0	0	0	2	0	0
LOC_Os01g47420		12.0373	7.61735	13.4423	8.66886	8.3568	18.6388	10.62	7.55047	10.7909	NoDiff	P1POD	NoDiff			0	0	0	0	0	0	1	0	0
LOC_Os01g47430		144.443	119.579	139.669	161.078	94.1627	109.259	137.851	42.8612	137.412	P1PD		NoDiff			0	0	0	0	0	1	0	0	0
LOC_Os01g47490		48.9463	20.5928	7.88376	37.3941	39.2315	70.8108	52.7183	15.1455	31.7948		P2POD	P1ND			0	1	0	0	0	0	1	0	0
LOC_Os01g47510		0.125946	0	0	0.052298	0	0	0.038143	0	0.090846	P1POD		P1ND			0	1	0	0	0	0	1	0	0
LOC_Os01g47530		26.4943	48.9001	50.2157	44.7997	41.5168	42.6148	47.0908	29.0001	46.4185		NoDiff	P2PD	OsWJUMK1; OsMPK20-4; OsMPK8		0	0	0	0	0	1	0	0	0
LOC_Os01g47550		24.7633	10.2544	12.1778	31.9492	22.6931	10.7932	20.9249	9.63725	23.5301	NoDiff	P1ND	NoDiff			0	1	0	0	0	0	0	0	0
LOC_Os01g47570		0.131278	0	0.324362	0	0.080854	0	0	0.165862	0	NoDiff	NoDiff	P1PD			0	0	0	0	0	1	0	0	0
LOC_Os01g47730		11.0165	9.49482	3.5561	9.05897	13.4113	12.7442	8.82582	11.389	10.0523	NoDiff	NoDiff	P1NOD			1	0	0	0	0	0	0	0	0
LOC_Os01g47780		113.148	87.6153	69.5503	87.1744	98.4931	64.9863	95.4111	85.2234	84.8373	NoDiff	P2NOD	P1NOD			2	0	0	0	0	0	0	0	0
LOC_Os01g47830		0	0	0	0	0.12369	0	0	0	0	NoDiff	P2ND	NoDiff			0	1	0	0	0	0	0	0	0
LOC_Os01g47880		0	1.98926	0	0.326075	1.00743	0.989583	0	2.51705	0	P2ND	NoDiff				0	1	0	0	0	0	0	0	0
LOC_Os01g47920		21.893	25.3932	28.5315	56.0767	23.3727	69.5025	28.605	0	18.5784		P1POD	NoDiff			0	0	0	0	0	0	1	0	0
LOC_Os01g48010		4.78787	2.48033	1.27006	1.31154	1.40769	1.70191	3.81026	4.80848	0.939067	P2NOD	NoDiff				1	0	0	0	0	0	0	0	0
LOC_Os01g48110		3.61875	1.98216	2.07137	3.34629	3.27709	0	0	0	6.21239	CPOD	NoDiff	NoDiff			0	0	0	0	0	0	1	0	1
LOC_Os01g48120		88.6585	30.7498	33.7989	58.7586	52.1311	77.9796	140.978	270.395	205.456	P2MP	NoDiff	NoDiff			0	0	0	1	0	0	0	0	0
LOC_Os01g48130	1	0.211749	0	0	0	0.364078	0	0	0.149372	0.219943		P2ND				0	1	0	0	0	0	0	0	0
LOC_Os01g48390		11.1409	8.16949	17.7361	10.0071	9.68662	9.72118	12.5302	13.5251	15.2163	NoDiff	NoDiff	P1POD			0	0	0	0	0	0	1	0	0
LOC_Os01g48680		1.51105	3.92644	2.23141	6.10489	1.31194	0.438449	1.04147	3.87753	2.146	NoDiff	P1ND	NoDiff	OsTPC1		0	1	0	0	0	0	0	0	0
LOC_Os01g48700	1	13.0675	13.9877	15.5824	10.7891	10.0505	18.8715	11.0322	9.7918	12.0118	NoDiff	P1POD	NoDiff			0	0	0	0	0	0	1	0	0
LOC_Os01g48750		12.2309	12.9048	4.27525	7.38393	10.1359	11.9224	6.6012	12.4367	6.91479	NoDiff	NoDiff	P2NOD			1	0	0	0	0	0	0	0	0
LOC_Os01g48770		230.781	110.44	105.633	219.498	145.269	188.115	260.167	187.988	220.452	NoDiff	NoDiff	P1ND			0	1	0	0	0	0	0	0	0
LOC_Os01g48790		42.2089	30.2708	39.9573	17.7274	22.4038	32.2388	25.25	14.9737	22.3487	NoDiff	P2PD	NoDiff			0	0	0	0	0	1	0	0	0
LOC_Os01g48930		113.556	172.933	133.58	80.9668	164.745	138.323	100.031	129.988	130.491		P2MP				0	0	0	1	0	0	0	0	0
LOC_Os01g48950		0	0	0	0	0	0	0	0.487044	0	P2ND	NoDiff	NoDiff			0	1	0	0	0	0	0	0	0
LOC_Os01g49024		0	0	0	0	0.223092	0	0	0	0	NoDiff	P2ND	NoDiff	SUI3		0	1	0	0	0	0	0	0	0
LOC_Os01g49120		6.03148	6.14401	4.7626	4.41967	3.93325	4.55719	9.81052	5.47375	7.59666	P1MP	NoDiff	NoDiff			0	0	0	1	0	0	0	0	0
LOC_Os01g49130		0	0	0.229841	0	0	0	0	0	0	NoDiff	NoDiff	CPOD			0	0	0	0	0	0	1	0	1
LOC_Os01g49154		0.276368	0.182865	0.620537	0.191266	0.752368	0.710096	0.460343	0.56862	0.677779	NoDiff		P1PD			0	0	0	0	0	1	0	0	0
LOC_Os01g49160		1.80509	2.18691	1.7552	3.06514	4.48757	5.44017	8.15105	10.207	12.3923	P2PD	NoDiff	NoDiff			0	0	0	0	0	1	0	0	0
LOC_Os01g49190		387.46	299.101	376.305	282.203	295.674	326.231	288.392	259.661	330.911	P1POD					0	0	0	0	0	0	1	0	0
LOC_Os01g49219		0	0	0.363139	0.218612	0	0	0.358745	0	0		NoDiff	CPOD			0	0	0	0	0	0	1	0	1
LOC_Os01g49260		34.3183	27.8197	26.1754	27.1491	34.0029	35.8113	40.19	41.2846	44.4141		P2PD	P1ND			0	1	0	0	0	1	0	0	0
LOC_Os01g49280		0.317206	0	0	0.529549	0.616315	0.337988	0	0.568318	0.174057	P2MP	P2NOD	P1ND			1	1	0	1	0	0	0	0	0
LOC_Os01g49370		96.9787	1437.26	1585.08	799.315	1147.8	637.043	928.21	1234.74	713.422			P2PD			0	0	0	0	0	1	0	0	0
LOC_Os01g49529		24.3042	21.5259	22.6258	3.08595	21.3826	3.69497	20.2105	28.9524	37.7751	P2PD		NoDiff			0	0	0	0	0	1	0	0	0
LOC_Os01g49580		0	0.330281	0	0.039481	0.324384	0.195067	0.086385	0.386887	0.123447			P2ND			0	1	0	0	0	0	0	0	0
LOC_Os01g49614		0.108231	0.512757	0.111982	0.071907	0.260526	0.146281	0.098334	0.305392	0.14989	NoDiff	NoDiff	P2ND			0	1	0	0	0	0	0	0	0
LOC_Os01g49650		0.210021	0.138963	0	0.17442	0.361106	0	0.127211	0.740768	0.11488	P2ND	P2ND	NoDiff			0	2	0	0	0	0	0	0	0
LOC_Os01g49740		0.083991	0	0.096556	0	0.240686	0.07095	0.076311	0.148122	0.2181	P2POD	P2MP				0	0	0	1	0	0	1	0	0
LOC_Os01g49880		0	0	0	0	0	0	0	0	0.452641	CPOD	NoDiff	NoDiff			0	0	0	0	0	0	1	0	1
LOC_Os01g49960		0	0.531333	0	0.570975	0	0	0	0	1.30921	CPOD	NoDiff	NoDiff			0	0	0	0	0	0	1	0	1
LOC_Os01g49970		0	0	0	0	0	0.16241	0.109176	0.084765	0.166417	NoDiff	CPOD	NoDiff			0	0	0	0	0	0	1	0	1
LOC_Os01g49990		0	0	0.675023	0.162548	0	0.496007	0.177828	0	0.508245			CPOD			0	0	0	0	0	0	1	0	1
LOC_Os01g50100		6.40756	7.34716	9.02622	7.39998	5.56556	8.06554	6.96205	5.8518	6.51105	NoDiff		P2PD			0	0	0	0	0	1	0	0	0
LOC_Os01g50290		0.227492	0.435447	0	0.523758	0	0.692227	0	0	0	NoDiff	P1PD				0	0	0	0	0	1	0	0	0
LOC_Os01g50360		2.73006	2.26838	1.01449	1.03152	2.87109	1.93984	1.10459	2.44558	2.07329	NoDiff	NoDiff	P1ND			0	1	0	0	0	0	0	0	0
LOC_Os01g50450		35.4323	27.9098	21.7476	27.7869	30.3794	31.7274	21.6385	20.5701	24.3427	NoDiff	NoDiff	P1NOD			1	0	0	0	0	0	0	0	0
LOC_Os01g50622		5.67486	5.64184	5.0476	3.03881	3.68207	5.19449	2.05632	2.31388	2.82504	NoDiff	P2PD	NoDiff			0	0	0	0	0	1	0	0	0
LOC_Os01g50660		0	0.395645	0.68741	0.1207	1.17803	0.336739	0.181091	3.67616	1.17891	P2NPD					0	0	1	0	0	0	0	0	0
LOC_Os01g50680		0.106712	0	0.343705	0.609151	0.135864	1.38271	0.455649	0	0		P1POD	NoDiff			0	0	0	0	0	0	1	0	0
LOC_Os01g50690		13.2264	9.46742	12.5062	12.8746	11.1608	14.3643	11.5353	11.5368	14.4721	P2POD					0	0	0	0	0	0	1	0	0
LOC_Os01g50700		0.058903	0	0.101574	0	0.35447	0.497576	0.107034	0.415517	1.19815	P2POD	P2PD	NoDiff			0	0	0	0	0	1	1	0	0
LOC_Os01g50760		36.3892	33.8227	41.5006	32.9707	38.1318	71.3378	62.5692	48.3948	46.4301	NoDiff	P2POD	NoDiff			0	0	0	0	0	0	1	0	0
LOC_Os01g50790		1.03038	1.07096	0.413627	0.554888	0.678997	1.66679	1.00249	1.29479	1.08926	NoDiff	P2POD	NoDiff			0	0	0	0	0	0	1	0	0
LOC_Os01g50870		0.208899	0	0	0.028915	0	0.198522	0	0	0.116778	NoDiff	P1POD				0	0	0	0	0	0	1	0	0
LOC_Os01g50930		7.68086	18.4639	16.786	7.52485	15.4686	22.5129	19.6196	20.1955	17.2456	NoDiff	P2PD				0	0	0	0	0	1	0	0	0
LOC_Os01g51280		22.6719	19.5143	20.4201	18.2543	37.6743	49.6096	20.0519	19.2555	28.6182	NoDiff	P2POD	NoDiff			0	0	0	0	0	0	1	0	0
LOC_Os01g51340		0.144837	0.191668	1.24879	0.481142	0.249029	0.367045	0.482507	0.255428	0.376101	NoDiff	NoDiff	P2POD			0	0	0	0	0	0	1	0	0
LOC_Os01g51410		10.5299	9.01163	17.7235	8.43635	8.39147	8.50394	7.04086	8.5028	8.50891	NoDiff	NoDiff	P1POD			0	0	0	0	0	0	1	0	0
LOC_Os01g51420		0.987412	0	0	2.94297	0.351884	0	0.715779	0	0	P1ND	CNOD	P1ND			1	2	0	0	0	0	0	1	0
LOC_Os01g51570		0.310611	0	0	0.171973	0.178019	0	0	0	0	NoDiff	CNOD	P1ND			1	1	0	0	0	0	0	1	0
LOC_Os01g51610	1	6.34295	1.0357	4.64862	6.22308	2.19325	5.91337	6.13105	3.06718	8.25498	P1POD	P1PD	P1MP	OsLFL1	OsLFL1	0	0	0	1	0	1	1	0	0
LOC_Os01g51632		7.8259	1.10946	13.1734	8.34745	8.19015	7.7104	6.92998	5.60076	6.03583	NoDiff	NoDiff	P1PD			0	0	0	0	0	1	0	0	0
LOC_Os01g51650		0	0	0	0	0	0	0	0.073182	0	P2ND	NoDiff	NoDiff			0	1	0	0	0	0	0	0	0
LOC_Os01g51720		0.218128	0.519582	0	0.398536	1.12513	0.110556	0	0.230809	0.302089	NoDiff	P2ND	P2ND			0	2	0	0	0	0	0	0	0
LOC_Os01g51830		0	0.372842	0.269913	0.051997	0	0.211553	0.483519	0.220831	0	P1ND	NoDiff	NoDiff			0	1	0	0	0	0	0	0	0
LOC_Os01g51880		0.759989	0	0	0	0.392228	0	0	0	0	NoDiff		P1ND			0	1	0	0	0	0	0	0	0
LOC_Os01g51980		0	0	0.546473	0	0	0	0.610454	0	0		NoDiff	CPOD			0	0	0	0	0	0	1	0	1
LOC_Os01g51990		0.678923	0	0	0.26149	0	0.286754	0.350306	0	0.359125			P1ND			0	1	0	0	0	0	0	0	0
LOC_Os01g52030	1	0.950852	1.02952	0.745301	0.574307	0.668812	2.55416	0.863905	1.0671	0.299285	NoDiff	P2POD	NoDiff			0	0	0	0	0	0	1	0	0
LOC_Os01g52120		0	0	0	0.488377	0.52343	0	0	0	0	NoDiff	CNOD	NoDiff			1	0	0	0	0	0	0	1	0
LOC_Os01g52260		30.9266	21.7154	11.2232	19.359	16.865	20.3929	10.9459	15.6296	16.6209	NoDiff	NoDiff	P1NOD			1	0	0	0	0	0	0	0	0
LOC_Os01g52380		0.429264	0.497054	0	0.148541	0.276775	0.392831	0.195006	0.063087	0.27867	NoDiff	NoDiff	CNOD			1	0	0	0	0	0	0	1	0
LOC_Os01g52440		0	0	0	0	0	0	0	0	0.21615	CPOD	NoDiff	NoDiff			0	0	0	0	0	0	1	0	1
LOC_Os01g52480		0	0	0.349041	0.1681	0.062241	0	0	0	0.070081	NoDiff	NoDiff	CPOD			0	0	0	0	0	0	1	0	1
LOC_Os01g52514	1	0	0	0	0	0.213048	0	0	0.760698	0	P2ND		NoDiff			0	1	0	0	0	0	0	0	0
LOC_Os01g52540	1	30.2174	23.6951	40.131	26.5621	19.0756	27.9061	23.989	24.2871	28.6391	NoDiff		P1POD			0	0	0	0	0	0	1	0	0
LOC_Os01g52560		8.36463	6.59539	8.69238	6.53338	4.11154	7.61631	5.58633	5.30174	7.6925	P1POD	P1PD				0	0	0	0	0	1	1	0	0
LOC_Os01g52570		0	0.127214	0.110514	0.319342	0.385664	0.378955	0.524043	0	0.49925	P1PD	NoDiff	NoDiff			0	0	0	0	0	1	0	0	0
LOC_Os01g52790		2.72568	1.04633	1.80682	1.22757	1.33282	1.7185	0.901493	1.09365	1.8953	P2POD	NoDiff	P1MP			0	0	0	1	0	0	1	0	0
LOC_Os01g52810		0	1.67056	1.61251	0	3.36614	1.85937	0	2.98884	1.92801		P2MP				0	0	0	1	0	0	0	0	0
LOC_Os01g52830		0	0	0	0.074712	0.116008	0	0	0	0.116802	CPOD		NoDiff			0	0	0	0	0	0	1	0	1
LOC_Os01g52840	1	0.079435	9.92401	4.31017	0	7.97987	4.94103	0.137321	7.21364	3.72546	P2MP	P2MP	P2MP			0	0	0	3	0	0	0	0	0
LOC_Os01g52851		66.1232	44.6935	46.9764	41.8345	36.5858	51.6101	38.818	33.4169	41.5192	NoDiff	P1PD				0	0	0	0	0	1	0	0	0
LOC_Os01g52864		6.54373	6.74031	2.77948	4.34752	4.9657	5.47288	3.57559	4.72997	4.46265	NoDiff	NoDiff	P2NOD			1	0	0	0	0	0	0	0	0
LOC_Os01g52880		215.257	140.144	134.404	137.019	170.358	216.947	183.387	200.377	184.299	NoDiff	P2PD				0	0	0	0	0	1	0	0	0
LOC_Os01g52970		0.893413	0.84449	0	0.634218	0.731483	0.790633	0.850372	1.50055	0.478719		NoDiff	P1ND			0	1	0	0	0	0	0	0	0
LOC_Os01g53000		31.4458	61.6571	71.8937	26.9389	24.6638	23.4668	24.1648	58.8629	27.2438		NoDiff	P2PD			0	0	0	0	0	1	0	0	0
LOC_Os01g53090		1.41288	1.82906	0	0.153049	0.369671	0.674588	0.278159	0	0.293565	NoDiff	NoDiff	CNOD			1	0	0	0	0	0	0	1	0
LOC_Os01g53100		0	0.478314	0	0	0	0	0	0	0	NoDiff	NoDiff	P2ND			0	1	0	0	0	0	0	0	0
LOC_Os01g53130		7.07609	6.28271	9.36091	6.71373	2.25919	7.53889	6.61221	5.86622	7.63464	NoDiff	P1PD	P1PD			0	0	0	0	0	2	0	0	0
LOC_Os01g53170		0.899494	2.14761	1.17619	1.74368	1.97858	3.12752	1.36711	1.86957	2.19422	NoDiff	P2PD	NoDiff			0	0	0	0	0	1	0	0	0
LOC_Os01g53220	1	4.02395	5.17504	3.81154	3.36372	2.9521	4.83542	2.83211	3.16353	10.374	P2POD	NoDiff	NoDiff	OsHsfC1b		0	0	0	0	0	0	1	0	0
LOC_Os01g53230		0	0	0.231257	0	0	0	0	0	0	NoDiff	NoDiff	CPOD			0	0	0	0	0	0	1	0	1
LOC_Os01g53420		0.29761	0.369223	0.769805	0.587009	1.34322	0.542084	0.270396	0.524851	0.70841		P2ND	P2POD			0	1	0	0	0	0	1	0	0
LOC_Os01g53440		0.162131	0	0.040772	0	0	0.356659	0.294611	0	0.140336	NoDiff	CPOD	NoDiff			0	0	0	0	0	0	1	0	1
LOC_Os01g53460		12.1353	6.85649	4.78285	5.99846	7.66506	9.32087	8.11395	11.0312	11.4531	NoDiff	NoDiff	P1ND			0	1	0	0	0	0	0	0	0
LOC_Os01g53520		1154.79	794.812	1279.29	457.354	542.159	520.359	577.932	257.748	412.708	NoDiff	NoDiff	P1PD			0	0	0	0	0	1	0	0	0
LOC_Os01g53760		0.62073	0.410717	0.356799	1.18495	1.24515	1.33272	0.548303	1.82448	0.179096	P2ND	NoDiff	NoDiff			0	1	0	0	0	0	0	0	0
LOC_Os01g53900		35.5986	15.5722	26.9378	54.2421	19.2327	42.304	28.2202	16.0871	27.9115		P1MP				0	0	0	1	0	0	0	0	0
LOC_Os01g54300		8.93901	4.47705	8.84525	4.7064	4.85486	7.421	3.79928	5.93285	5.0992	NoDiff	P2POD				0	0	0	0	0	0	1	0	0
LOC_Os01g54350		0.557065	0.398079	0.499517	0.333099	0.777822	0.828205	0.222041	0.11789	0.809801	P1POD		NoDiff			0	0	0	0	0	0	1	0	0
LOC_Os01g54440		8.54171	8.28423	5.19544	5.6531	7.21166	7.66651	7.93772	7.22651	6.88041	NoDiff		P1NOD			1	0	0	0	0	0	0	0	0
LOC_Os01g54520		0	0	0	0	0	0	0	0.159753	0	P2ND	NoDiff	NoDiff			0	1	0	0	0	0	0	0	0
LOC_Os01g54570		14.5881	11.2817	6.63062	7.69133	7.96914	10.062	7.45018	5.89694	7.00368	NoDiff	NoDiff	P1ND			0	1	0	0	0	0	0	0	0
LOC_Os01g54680		0	0	0	0	0	0.14726	0.138588	0	0.207479	P1PD	CPOD	NoDiff			0	0	0	0	0	1	1	0	1
LOC_Os01g54714		0	0	0.237106	0	0.074502	0.230644	0.131886	0.221243	0.125646	NoDiff	P2PD	CPOD			0	0	0	0	0	1	1	0	1
LOC_Os01g54730		55.876	42.1575	19.5481	63.007	43.6501	42.937	39.0396	48.8364	42.2619	NoDiff	P1ND	P1NOD			1	1	0	0	0	0	0	0	0
LOC_Os01g54760		0	0	0	0	0	0.125915	0	0	0	NoDiff	CPOD	NoDiff			0	0	0	0	0	0	1	0	1
LOC_Os01g54800		3.12634	1.66599	1.04928	0.734358	0.657103	0.653267	0.528332	0.507473	0	NoDiff	NoDiff	P1ND			0	1	0	0	0	0	0	0	0
LOC_Os01g54810		60.8639	50.8391	49.6934	51.8852	44.2567	51.9171	50.1024	50.2218	67.9462	P2POD	NoDiff	NoDiff	THIS1		0	0	0	0	0	0	1	0	0
LOC_Os01g54980		26.2636	0	12.6464	24.6761	0	17.1133	23.1637	0.564549	13.7023	P1MP		P1MP			0	0	0	2	0	0	0	0	0
LOC_Os01g55050		5.64374	6.63486	60.0391	6.78243	6.32422	7.63448	39.1736	48.6853	8.00987		NoDiff	P2POD			0	0	0	0	0	0	1	0	0
LOC_Os01g55060		0	0	0	0	0.207525	0	0	0.195117	0	P2ND	P2ND	NoDiff			0	2	0	0	0	0	0	0	0
LOC_Os01g55110		4.2625	3.64023	1.70938	2.88136	3.83486	1.92594	1.75624	1.39854	0.943829	NoDiff		P1NOD			1	0	0	0	0	0	0	0	0
LOC_Os01g55190		602.271	635.784	574.982	529.372	798.945	654.415	567.588	633.165	665.423	NoDiff	P2MP	NoDiff			0	0	0	1	0	0	0	0	0
LOC_Os01g55200		0.244369	0.346479	0	0.579844	1.15145	0.265405	0	0	0.271953	CPOD	P2NOD	CNOD	OsKAT1		2	0	0	0	0	0	1	1	1
LOC_Os01g55210		0.240062	0.476524	0	0.099684	0	1.01394	0	0	0	NoDiff	P1POD	NoDiff			0	0	0	0	0	0	1	0	0
LOC_Os01g55300		6.70877	13.4985	20.1936	7.16003	13.5363	7.44531	6.64105	11.958	8.81016	NoDiff	NoDiff	P2PD			0	0	0	0	0	1	0	0	0
LOC_Os01g55310		0	1.14271	0.95914	0	1.1022	0.681042	0	0	1.20765	CPOD	NoDiff	NoDiff			0	0	0	0	0	0	1	0	1
LOC_Os01g55390		0.06231	14.0951	7.3804	0.025875	13.5146	8.20512	0.113225	10.9109	6.74346	P2MP	P2MP	P2MP			0	0	0	3	0	0	0	0	0
LOC_Os01g55430	1	2.53874	3.55119	3.99361	1.30199	1.29603	3.19304	0.648111	0.654228	1.06431	NoDiff	P1POD	NoDiff			0	0	0	0	0	0	1	0	0
LOC_Os01g55450		21.0178	16.5988	16.4766	18.2491	17.0851	21.8199	21.831	17.3577	21.5331		P1POD				0	0	0	0	0	0	1	0	0
LOC_Os01g55610		0.215307	0.793718	0.318239	0.306532	0.978371	0.493667	0.419185	1.7358	1.11819	P2MP					0	0	0	1	0	0	0	0	0
LOC_Os01g55670		0	0	0	0	0	0	0	0	1.14137	CPOD	NoDiff	NoDiff			0	0	0	0	0	0	1	0	1
LOC_Os01g55780		41.3835	32.261	43.4468	27.743	25.461	27.7349	30.4272	26.7774	39.1866	P1POD	NoDiff				0	0	0	0	0	0	1	0	0
LOC_Os01g55790		0	0.3292	0	0.137731	0	0.280187	0	0	0	NoDiff	P1PD				0	0	0	0	0	1	0	0	0
LOC_Os01g55920		0	0	0	0	0	0.16241	0	0	0	NoDiff	CPOD	NoDiff			0	0	0	0	0	0	1	0	1
LOC_Os01g55930		0	0	0	0	0.172937	0.531026	0	0	0	NoDiff	P2POD	NoDiff			0	0	0	0	0	0	1	0	0
LOC_Os01g55940		6.35266	1.74685	2.03917	4.63154	1.25303	2.43922	2.12381	0.578819	0.952156	NoDiff		P1ND	OsGH3-2		0	1	0	0	0	0	0	0	0
LOC_Os01g56090		28.0739	20.9027	17.8932	24.4654	18.9438	21.578	21.0352	15.1005	16.5555	NoDiff	NoDiff	P1ND			0	1	0	0	0	0	0	0	0
LOC_Os01g56150		34.1257	26.3776	12.8835	18.9113	19.2464	23.0545	13.1941	21.132	18.8786	NoDiff	NoDiff	P1ND			0	1	0	0	0	0	0	0	0
LOC_Os01g56160		0.343486	0.340911	0.444235	0.268919	0.664406	0.072538	0.312077	0	0.148656	NoDiff	P2ND	NoDiff			0	1	0	0	0	0	0	0	0
LOC_Os01g56180		13.9715	12.4068	12.6639	12.5044	21.5941	16.7286	15.1239	15.257	19.2703	P2POD	P2MP	NoDiff			0	0	0	1	0	0	1	0	0
LOC_Os01g56300		114.544	112.552	136.134	112.487	96.8123	109.255	98.8914	92.9362	111.41	P1PD	NoDiff	P1POD			0	0	0	0	0	1	1	0	0
LOC_Os01g56330		169.868	158.894	154.822	152.764	171.305	168.026	131.261	184.434	180.943	P2PD	NoDiff	NoDiff			0	0	0	0	0	1	0	0	0
LOC_Os01g56420		1.90352	0.60456	0.131299	1.13821	0.130915	0.836143	0.553428	0.402835	0.065906	NoDiff		P1ND	COPT1		0	1	0	0	0	0	0	0	0
LOC_Os01g56480		0.680061	1.21448	0.972678	1.17679	1.02654	1.32954	0.88445	0.613699	2.32898	P1PD	NoDiff	NoDiff			0	0	0	0	0	1	0	0	0
LOC_Os01g56510		44.6409	42.1373	52.6504	28.8132	30.3982	55.0573	41.3901	45.4728	41.8949	NoDiff	P2POD	NoDiff			0	0	0	0	0	0	1	0	0
LOC_Os01g56580		74.3937	59.721	98.078	89.8388	78.3101	87.2293	86.3122	80.7167	102.216		NoDiff	P1POD			0	0	0	0	0	0	1	0	0
LOC_Os01g56640		4.00627	6.3447	14.422	4.48278	4.71705	7.7066	4.04798	8.12793	2.59451	P2ND	P2POD	P2POD			0	1	0	0	0	0	2	0	0
LOC_Os01g56660		0.560154	0.347329	1.42526	0.703447	0.431402	0.918389	0.609996	0.468515	0.556172	NoDiff		P1POD			0	0	0	0	0	0	1	0	0
LOC_Os01g56680		1.88253	0.344984	0	0	0.021317	0	0	0	0.023452	NoDiff	NoDiff	P1ND			0	1	0	0	0	0	0	0	0
LOC_Os01g56720		0	0	0	0	1.45408	0	0	3.00518	0.347312	P2ND		NoDiff			0	1	0	0	0	0	0	0	0
LOC_Os01g56740		0.198952	0.157968	0.343075	0.231318	0.102622	0.504183	0.469974	0.421034	0.309973	NoDiff	P1POD	NoDiff			0	0	0	0	0	0	1	0	0
LOC_Os01g56764		0	0.11805	0	0.076094	0.074873	0	0.083248	0	0		CNOD				1	0	0	0	0	0	0	1	0
LOC_Os01g56800		7.95244	24.2511	10.1406	7.5885	5.15836	31.3355	5.96413	20.9177	6.54951	NoDiff	P1POD	NoDiff			0	0	0	0	0	0	1	0	0
LOC_Os01g56810		6.97246	5.47029	3.2723	4.55396	4.92743	5.512	2.47989	2.24841	2.77966	NoDiff	NoDiff	P1NOD			1	0	0	0	0	0	0	0	0
LOC_Os01g56820		0.293824	26.5037	33.4161	25.8561	23.6012	22.6722	23.0221	19.2896	21.0407	NoDiff	NoDiff	P2PD			0	0	0	0	0	1	0	0	0
LOC_Os01g56840		0.049715	0.172698	0	0.041288	0.042739	0.20998	0.090339	0	0.086065	NoDiff	P2POD				0	0	0	0	0	0	1	0	0
LOC_Os01g56850		0.085684	6.6899	3.36761	0.118599	6.75819	4.24627	0.103798	8.10943	2.7194	P2MP	P2MP	P2MP			0	0	0	3	0	0	0	0	0
LOC_Os01g56870		0.766484	0.659305	0.660867	0.909424	0.811864	1.87408	1.09055	0.450579	1.23844		P1POD	NoDiff			0	0	0	0	0	0	1	0	0
LOC_Os01g56980		11.9826	6.1572	10.4598	9.7226	7.03682	11.9955	10.0341	7.32835	11.8219	P1PD	P1PD				0	0	0	0	0	2	0	0	0
LOC_Os01g57050		0	0	0.416516	0.107078	0	0	0	0	0.269412	NoDiff	NoDiff	CPOD			0	0	0	0	0	0	1	0	1
LOC_Os01g57082		1.54727	0.289802	0.532921	1.01666	0.749658	1.04753	0.360038	0	0.831916	P1POD	NoDiff				0	0	0	0	0	0	1	0	0
LOC_Os01g57100		1.18859	0.827014	0.942958	0.666784	0.761117	1.22996	0.780725	1.33173	0.9241	NoDiff	P2PD	NoDiff			0	0	0	0	0	1	0	0	0
LOC_Os01g57120		1.26937	2.83957	3.0031	1.15212	1.44206	2.48231	1.07921	1.38703	1.21612	NoDiff	P2POD	P2PD			0	0	0	0	0	1	1	0	0
LOC_Os01g57150		54.9696	45.5959	47.4343	35.81	41.1493	58.4579	60.6357	57.1215	67.1847	NoDiff	P2POD	NoDiff			0	0	0	0	0	0	1	0	0
LOC_Os01g57240		37.6956	16.788	25.0546	35.2818	25.6554	35.4442	73.1198	41.4956	68.1718	P1PD	NoDiff				0	0	0	0	0	1	0	0	0
LOC_Os01g57250		0.585419	39.7037	13.3759	1.70164	38.9437	19.4006	1.59566	31.1434	15.075	P2MP	P2MP	P2MP			0	0	0	3	0	0	0	0	0
LOC_Os01g57310		0.316714	1.98162	1.4503	0.339167	1.77813	1.53197	0.384792	1.87179	1.97116	P2PD					0	0	0	0	0	1	0	0	0
LOC_Os01g57410		7.20717	8.03193	9.51329	8.7026	8.95506	8.85186	8.42722	7.6116	0.543317	P1NOD	NoDiff	NoDiff			1	0	0	0	0	0	0	0	0
LOC_Os01g57470		0.562945	0.12416	0	0.051946	0.16132	0.317026	0.17049	0.330929	0.054141			P1ND			0	1	0	0	0	0	0	0	0
LOC_Os01g57550		9.00408	11.5394	11.9805	5.751	8.54377	11.6676	8.45515	9.13596	6.71844	NoDiff	P2PD	NoDiff			0	0	0	0	0	1	0	0	0
LOC_Os01g57620		0.372865	0.444083	0.771565	0.380623	0.769312	0.376652	0.271016	0.263027	0.968225	P1POD	NoDiff	NoDiff			0	0	0	0	0	0	1	0	0
LOC_Os01g57630		29.4347	23.0493	29.9458	26.1728	24.999	28.6668	7.04813	19.5242	26.8789	P2PD	NoDiff	NoDiff			0	0	0	0	0	1	0	0	0
LOC_Os01g57690		1.04945	0	0.571483	0.550459	0.237422	0.373267	0	0	0	NoDiff	NoDiff	P1MP			0	0	0	1	0	0	0	0	0
LOC_Os01g57790		0	0	0	0	0	0.096422	0	0	0	NoDiff	CPOD	NoDiff			0	0	0	0	0	0	1	0	1
LOC_Os01g57880		2.06151	2.98221	0.738656	0.947216	1.25836	1.58176	0	0	0.626674	NoDiff	NoDiff	P2ND			0	1	0	0	0	0	0	0	0
LOC_Os01g57890	1	0.148538	0.181299	0	0.144068	0.21249	0.125301	0.292706	0	0.514127	P1PD	NoDiff	NoDiff			0	0	0	0	0	1	0	0	0
LOC_Os01g57900		6.19086	6.41397	6.85779	5.83907	5.40679	7.83859	5.49512	6.28287	6.4234	NoDiff	P1POD	NoDiff			0	0	0	0	0	0	1	0	0
LOC_Os01g57920		2.19654	10.9755	14.6759	2.32743	9.11079	10.813	1.75483	8.01458	10.6873	P2PD	P2PD	P2POD			0	0	0	0	0	2	1	0	0
LOC_Os01g57990		9.08653	63.2252	15.5993	19.6252	49.1035	16.5996	15.5976	65.121	16.7428	P2ND		P2ND			0	2	0	0	0	0	0	0	0
LOC_Os01g58020		39.8653	6.34581	21.8236	31.5311	3.97608	13.9851	33.4412	4.80477	14.7884	P1MP	P1MP	P1MP			0	0	0	3	0	0	0	0	0
LOC_Os01g58070		0	0	0	0	0.094433	0.198995	0	0	0.054986	NoDiff	P2PD	NoDiff			0	0	0	0	0	1	0	0	0
LOC_Os01g58080		67.4595	43.4187	4.24524	48.3419	38.248	57.7431	64.0152	56.2175	61.161	NoDiff	NoDiff	P1ND			0	1	0	0	0	0	0	0	0
LOC_Os01g58335		0.348675	1.08038	0.22486	0.209527	1.0211	0.347218	0.177712	1.19482	0.53245			P2ND			0	1	0	0	0	0	0	0	0
LOC_Os01g58400		13.9039	17.9025	22.0361	13.2739	15.8772	15.2107	15.3936	12.762	18.3859	NoDiff	NoDiff	P2PD			0	0	0	0	0	1	0	0	0
LOC_Os01g58490		0.225135	0	0	0	0.290319	0.285269	0.08949	0.19852	0.097436		P2PD	P1ND			0	1	0	0	0	1	0	0	0
LOC_Os01g58560	1	2.5618	7.94616	5.94485	2.40437	5.11233	5.05733	2.22898	6.38729	5.32519			P2MP			0	0	0	1	0	0	0	0	0
LOC_Os01g58670		0	0	0	0.261129	0.468905	0.440063	0.407576	0.810583	1.1273	P2PD	NoDiff	NoDiff			0	0	0	0	0	1	0	0	0
LOC_Os01g58690		11.6269	10.2666	16.2664	10.8879	9.7394	9.75925	7.73168	8.63728	7.33137	NoDiff	NoDiff	P1PD			0	0	0	0	0	1	0	0	0
LOC_Os01g58720		0	0	0	0	0	0.083168	0.119269	0	0.284065	P1POD	CPOD	NoDiff			0	0	0	0	0	0	2	0	1
LOC_Os01g58750		43.8858	31.904	28.0182	26.9865	39.31	32.4696	28.0068	37.7482	38.8021		NoDiff	P1ND			0	1	0	0	0	0	0	0	0
LOC_Os01g58754		20.2134	9.51294	7.36255	8.11535	7.40658	8.58576	9.00028	4.85329	5.59375	NoDiff	NoDiff	P1ND			0	1	0	0	0	0	0	0	0
LOC_Os01g58760	1	0.351168	1.25472	0.484447	0.373057	0.120757	0.474627	0	0.069672	0.060792	NoDiff		P2ND			0	1	0	0	0	0	0	0	0
LOC_Os01g58790		9.99676	3.74399	4.45307	7.41965	1.88415	5.37449	6.60129	4.03008	6.25053		P1MP	P1ND			0	1	0	1	0	0	0	0	0
LOC_Os01g58950		0	0	0	0	0.150018	0	0	0	0	NoDiff	P2ND	NoDiff			0	1	0	0	0	0	0	0	0
LOC_Os01g58960		0.037075	0	0	0.03079	0.095617	0.062636	0	0	0.032091	CPOD	P2MP				0	0	0	1	0	0	1	0	1
LOC_Os01g58990		0	0	0	0	0	0.035844	0	0	0.036729	CPOD	CPOD	NoDiff			0	0	0	0	0	0	2	0	2
LOC_Os01g59050		0.1642	0	0.152602	0.073494	0	0.478138	0	0	0	NoDiff	P1POD	NoDiff			0	0	0	0	0	0	1	0	0
LOC_Os01g59100		1.75493	2.06052	0.433944	1.27508	1.75616	2.30741	1.13539	2.21695	2.26435	NoDiff	NoDiff	P2ND			0	1	0	0	0	0	0	0	0
LOC_Os01g59160		7.55444	6.48467	9.17485	7.8748	7.0826	8.76409	4.97023	4.58035	11.3331	P1POD	NoDiff				0	0	0	0	0	0	1	0	0
LOC_Os01g59180		44.4357	32.4482	23.3637	19.4596	32.6018	32.0923	14.3762	13.9988	15.6019	NoDiff		P1ND			0	1	0	0	0	0	0	0	0
LOC_Os01g59190		1.15718	1.49019	3.35073	0.56679	2.29956	2.95851	0.681662	3.30845	2.84863			P2POD			0	0	0	0	0	0	1	0	0
LOC_Os01g59200		0	0	0	0	0	0.134833	0.048341	0	0.007676	NoDiff	CPOD	NoDiff			0	0	0	0	0	0	1	0	1
LOC_Os01g59210		0	0.218909	0.190171	0	0.189617	0.186318	0.300593	0.194487	0.763657	P1POD	NoDiff	NoDiff			0	0	0	0	0	0	1	0	0
LOC_Os01g59310		0	0.375001	0	0	0	0	0	0	0	NoDiff	NoDiff	P2ND			0	1	0	0	0	0	0	0	0
LOC_Os01g59340		13.9567	8.6594	13.9181	11.0232	10.4804	13.187	10.5623	8.85019	15.8934	P1PD	NoDiff	NoDiff			0	0	0	0	0	1	0	0	0
LOC_Os01g59400		0	0	0	0	0	0	0	0.478927	0	P2ND	NoDiff	NoDiff			0	1	0	0	0	0	0	0	0
LOC_Os01g59500		10.3076	23.2492	23.161	9.82483	9.12238	19.3099	17.031	6.24276	7.82246		P1POD				0	0	0	0	0	0	1	0	0
LOC_Os01g59750		6.8961	4.79837	3.07318	5.16912	3.71723	6.83203	5.81322	2.86575	3.91971	NoDiff		P1ND			0	1	0	0	0	0	0	0	0
LOC_Os01g59870		11.7034	14.0761	7.96718	7.80498	9.42655	8.22589	5.09629	6.29963	4.99272	NoDiff	NoDiff	P2ND			0	1	0	0	0	0	0	0	0
LOC_Os01g60010		7.91652	7.4044	8.09795	8.57006	8.26117	9.93223	7.09761	9.04994	10.7439	P2POD		NoDiff			0	0	0	0	0	0	1	0	0
LOC_Os01g60130		0	0	0	0	0	0	0	0.934326	0	P2ND	NoDiff	NoDiff			0	1	0	0	0	0	0	0	0
LOC_Os01g60220		3.78824	7.00004	5.3869	3.42216	5.79718	7.74723	4.21797	5.77595	5.8791	NoDiff	P2PD	NoDiff			0	0	0	0	0	1	0	0	0
LOC_Os01g60270	1	17.0152	25.4451	34.3723	8.98636	18.3432	17.4429	7.14618	24.1394	15.4433	P2MP		P2POD			0	0	0	1	0	0	1	0	0
LOC_Os01g60670		82.0424	53.9616	69.2052	63.6077	51.2609	73.3304	48.8642	45.1316	49.3122	NoDiff	P1PD	P1MP			0	0	0	1	0	1	0	0	0
LOC_Os01g60680		0	0	0.151883	0	0.178698	0.911322	0	0	0.254143	CPOD	P2POD	NoDiff			0	0	0	0	0	0	2	0	1
LOC_Os01g60740		1329.37	1201.07	999.844	957.513	989.611	962.632	740.614	919.222	897.598	NoDiff	NoDiff	P1NOD			1	0	0	0	0	0	0	0	0
LOC_Os01g60780		5.98837	5.73627	7.51848	6.87923	6.93375	1.56932	5.46773	4.4211	6.3438	NoDiff	P2NOD	NoDiff			1	0	0	0	0	0	0	0	0
LOC_Os01g60920		26.2509	23.8543	33.299	26.869	24.2747	28.6853	24.9601	21.2705	23.7137	NoDiff	NoDiff	P1POD			0	0	0	0	0	0	1	0	0
LOC_Os01g60990		7.5457	12.3646	11.964	6.1825	11.1975	14.7293	6.63485	8.43098	10.8042	NoDiff	P2PD	NoDiff			0	0	0	0	0	1	0	0	0
LOC_Os01g61070		2.25611	1.244	0	0	0.646518	1.05879	0	0	0	NoDiff		CNOD			1	0	0	0	0	0	0	1	0
LOC_Os01g61190		7.27756	6.72023	14.3997	9.08269	9.1866	8.86445	6.63704	9.93315	7.48032	NoDiff	NoDiff	P1POD			0	0	0	0	0	0	1	0	0
LOC_Os01g61250		14.3686	11.2826	22.5728	9.01587	9.92591	14.0213	10.6607	10.0724	10.9449	NoDiff	NoDiff	P1POD			0	0	0	0	0	0	1	0	0
LOC_Os01g61530		0	0	0	0	0	0.064621	0	0.056212	0	NoDiff	CPOD	NoDiff			0	0	0	0	0	0	1	0	1
LOC_Os01g61580		28.8271	38.5729	52.9639	19.8014	30.2346	36.3314	20.6221	32.3552	43.1197	P2PD		P2POD			0	0	0	0	0	1	1	0	0
LOC_Os01g61660		0.463631	0.864924	0.864328	0.499015	0.722291	1.22247	0.794107	0.694958	1.06101	NoDiff	P2PD	NoDiff			0	0	0	0	0	1	0	0	0
LOC_Os01g61700		0	0.498558	0	0	0	0	0	0.572056	0.189375		NoDiff	P2ND			0	1	0	0	0	0	0	0	0
LOC_Os01g61780		32.5695	32.3216	40.6264	25.1225	28.1369	35.7175	25.0277	19.7691	33.9032	P1POD	P2PD				0	0	0	0	0	1	1	0	0
LOC_Os01g61900		0.134755	0	0.464748	0	0.154464	0	0	0.237648	0	NoDiff	NoDiff	P1PD	OsCCT01		0	0	0	0	0	1	0	0	0
LOC_Os01g61960		0	0	0	0.196118	0.067671	0.132987	0	0	0	NoDiff	P1MP	NoDiff			0	0	0	1	0	0	0	0	0
LOC_Os01g62040		103.238	87.1336	71.9671	88.9708	65.6434	77.915	121.163	186.441	229.702	P2POD	NoDiff				0	0	0	0	0	0	1	0	0
LOC_Os01g62060		0.268657	0	0	0.287492	1.00656	0.197809	0	0	0	NoDiff	P2ND	NoDiff			0	1	0	0	0	0	0	0	0
LOC_Os01g62070		11.6145	16.5953	14.4774	11.597	12.1797	21.1029	15.9792	13.9864	14.1654	NoDiff	P2POD	NoDiff	OsMTP2		0	0	0	0	0	0	1	0	0
LOC_Os01g62160		49.1773	32.8994	37.4458	41.373	32.5884	37.2329	25.7789	21.2934	26.3473			P1MP			0	0	0	1	0	0	0	0	0
LOC_Os01g62190	1	0.528664	0.299829	0	0.250885	0.324633	0.446579	0.068617	0.532758	0		NoDiff	P1ND	ZFP179		0	1	0	0	0	0	0	0	0
LOC_Os01g62260		1859.94	1043.62	695.238	1219.5	894.442	1409.48	1158.64	967.695	1134.84	NoDiff		P1ND			0	1	0	0	0	0	0	0	0
LOC_Os01g62290		33.7704	31.9629	20.9318	25.0687	55.982	26.7183	61.9501	38.2567	24.7708	P1ND		NoDiff			0	1	0	0	0	0	0	0	0
LOC_Os01g62310	1	1.30329	0	0.358791	1.33817	1.56259	2.8626	2.73211	1.42697	2.05674	NoDiff	P2PD	NoDiff			0	0	0	0	0	1	0	0	0
LOC_Os01g62390		38.6511	25.3079	35.493	41.2227	16.8796	43.1472	30.0097	12.65	25.7072		P1PD	NoDiff			0	0	0	0	0	1	0	0	0
LOC_Os01g62480		0.281945	0	0	0.182514	0.08097	0.159123	0	0.332203	0	P2ND	NoDiff				0	1	0	0	0	0	0	0	0
LOC_Os01g62490		0	0	0.101574	0.048919	0	0	0	0	0	NoDiff	NoDiff	CPOD			0	0	0	0	0	0	1	0	1
LOC_Os01g62500		74.0261	60.736	77.8948	60.1344	55.1553	68.8893	60.2523	56.5769	64.109	NoDiff	P1PD	P1PD			0	0	0	0	0	2	0	0	0
LOC_Os01g62540		0	0	0	0	0	0	0	0	0.375891	CPOD	NoDiff	NoDiff			0	0	0	0	0	0	1	0	1
LOC_Os01g62570		0.273708	0.608228	1.96224	1.25936	1.64319	1.62344	0.931386	1.55453	1.53315	NoDiff	NoDiff	P2POD			0	0	0	0	0	0	1	0	0
LOC_Os01g62600		0.23787	0	0	0	0	0	0	0	0.102947	CPOD	NoDiff	P1ND			0	1	0	0	0	0	1	0	1
LOC_Os01g62605		71.9297	60.635	42.2644	39.2921	47.8551	47.475	32.801	35.7745	28.9159	NoDiff	NoDiff	P1NOD			1	0	0	0	0	0	0	0	0
LOC_Os01g62640		0	0	0	0	0	0	0.08364	0	0.398412	P1POD	NoDiff	NoDiff			0	0	0	0	0	0	1	0	0
LOC_Os01g62750		0	0.298061	0	0	0	0	0	0	0	NoDiff	NoDiff	P2ND			0	1	0	0	0	0	0	0	0
LOC_Os01g62820		41.9209	32.0492	42.8466	40.6741	30.8837	40.0496	20.8827	15.9786	24.5893	P1PD	P1PD	P1PD			0	0	0	0	0	3	0	0	0
LOC_Os01g63050		56.475	35.8039	39.187	28.2419	22.8451	34.4949	26.8574	33.6546	27.1217	NoDiff	P1PD				0	0	0	0	0	1	0	0	0
LOC_Os01g63140		0	0	0.260165	0	0.064852	0.063724	0	0	0	NoDiff	NoDiff	CPOD			0	0	0	0	0	0	1	0	1
LOC_Os01g63170		1.32602	1.16638	1.16194	1.34299	1.05241	1.34748	1.05638	1.03125	2.41192	P1POD	NoDiff	NoDiff			0	0	0	0	0	0	1	0	0
LOC_Os01g63230		3.31071	2.86403	4.90904	3.7649	2.69945	3.93334	2.57851	2.28499	2.92692	NoDiff	NoDiff	P1PD			0	0	0	0	0	1	0	0	0
LOC_Os01g63480		1.78672	1.69623	1.16098	1.44084	2.89396	2.58113	2.18799	5.2973	3.58619	P2MP	NoDiff	NoDiff			0	0	0	1	0	0	0	0	0
LOC_Os01g63550		0	0.071696	0.339289	0.059992	0.419189	0.244086	0	0.153551	0.109423	NoDiff	NoDiff	P2POD			0	0	0	0	0	0	1	0	0
LOC_Os01g63570		0	0	0	0	0	0.103103	0	0	0	NoDiff	CPOD	NoDiff			0	0	0	0	0	0	1	0	1
LOC_Os01g63600		0	0.580698	0	0	0.448253	1.0973	0	0	1.29428	CPOD	P2PD	NoDiff			0	0	0	0	0	1	1	0	1
LOC_Os01g63770		23.5279	22.7031	17.8264	19.3796	13.8642	31.7262	15.7425	18.6798	20.0704	NoDiff	P1POD	NoDiff	OsAUX1		0	0	0	0	0	0	1	0	0
LOC_Os01g63910		19.1496	22.1549	28.068	16.7663	15.3559	23.0658	12.6872	13.5465	16.2389	NoDiff	P1PD	P2PD			0	0	0	0	0	2	0	0	0
LOC_Os01g63960		0.19478	0.25776	0.620092	0.348414	0.386424	0.329076	0.299488	0.264236	0.298287	NoDiff	NoDiff	P2POD			0	0	0	0	0	0	1	0	0
LOC_Os01g64060		0	0.674396	0	0.113834	0	0.578936	0.179849	0.460761	0.177966	NoDiff	P1PD				0	0	0	0	0	1	0	0	0
LOC_Os01g64080		0	0	0	0.044331	0	0.022546	0	0.047069	0.069306	P2PD	NoDiff	NoDiff			0	0	0	0	0	1	0	0	0
LOC_Os01g64130		0.158097	0	0.03298	0.013766	0.052611	0.051696	0.052128	0.251829	0.016554	P2ND	NoDiff				0	1	0	0	0	0	0	0	0
LOC_Os01g64280		33.5127	0	0	0	18.3851	0	0	0	21.6904	CPOD		P1ND			0	1	0	0	0	0	1	0	1
LOC_Os01g64510		0	0	0	0	0	0	0	0.174178	0	P2ND	NoDiff	NoDiff			0	1	0	0	0	0	0	0	0
LOC_Os01g64540		0.040558	0.241523	0	0.067366	0.24407	0.107778	0.073699	0.143053	0			P2ND			0	1	0	0	0	0	0	0	0
LOC_Os01g64670		0.079435	0	0	0	0	1.07363	0	0	0	NoDiff	CPOD	NoDiff			0	0	0	0	0	0	1	0	1
LOC_Os01g64720		33.2047	35.1006	26.09	26.6672	22.2473	25.7875	39.044	37.5669	29.4439	P1NOD	NoDiff	P2NOD			2	0	0	0	0	0	0	0	0
LOC_Os01g64780		67.4972	42.0877	45.4635	40.8095	32.2077	57.8078	57.4818	45.0713	51.764	NoDiff	P1PD				0	0	0	0	0	1	0	0	0
LOC_Os01g64880		0.851427	0	0	0	0	0.817057	0	0	0	NoDiff	CPOD				0	0	0	0	0	0	1	0	1
LOC_Os01g64890		1.15086	0	0	0.18665	0.128808	0	0	0	0.12969	CPOD	CNOD	P1ND	OsMGT1		1	1	0	0	0	0	1	1	1
LOC_Os01g64910		0	0	0	0	0	0	0	0	0.031711	CPOD	NoDiff	NoDiff			0	0	0	0	0	0	1	0	1
LOC_Os01g64930		49.8847	48.1269	35.0694	34.7515	31.3665	29.0734	32.631	28.0163	30.0401	NoDiff	NoDiff	P1NOD			1	0	0	0	0	0	0	0	0
LOC_Os01g64980		20.1284	17.6711	9.89801	16.0109	18.4293	16.1685	16.4417	4.49005	16.2853		NoDiff	P1ND			0	1	0	0	0	0	0	0	0
LOC_Os01g65140		0.12705	0	0.219086	0	0.738232	0.590278	0	0.54982	0.638894	P2PD	P2PPD	P1PD			0	0	0	0	1	2	0	0	0
LOC_Os01g65220		27.1981	20.2876	26.2782	22.31	16.5715	28.9323	22.838	17.0554	20.9291	NoDiff	P1POD				0	0	0	0	0	0	1	0	0
LOC_Os01g65510		0.044733	0.177593	0	0	0.076914	0	0.040642	0	0.03872	NoDiff	NoDiff	P2ND			0	1	0	0	0	0	0	0	0
LOC_Os01g65520		31.7871	26.0304	35.9538	25.3565	32.0211	23.9921	32.3295	28.7315	30.7048	NoDiff	P2ND	P1POD			0	1	0	0	0	0	1	0	0
LOC_Os01g65700		0.133013	0	0.344056	0.110466	0.171526	0.168541	0.12085	0	0.402966	P1PD	NoDiff				0	0	0	0	0	1	0	0	0
LOC_Os01g65850		1.51011	0.687258	2.01267	2.06942	1.3802	1.94895	2.65285	2.6249	2.28256	NoDiff		P1PD			0	0	0	0	0	1	0	0	0
LOC_Os01g65904		14.9024	14.1106	6.1291	16.9996	16.6769	18.8981	17.2594	10.0694	13.3439	NoDiff	NoDiff	P1NOD			1	0	0	0	0	0	0	0	0
LOC_Os01g65986		12.8027	7.8222	21.9815	10.7233	9.02266	11.9012	9.80827	10.2388	12.6331	NoDiff	NoDiff	P1POD			0	0	0	0	0	0	1	0	0
LOC_Os01g66110		77.1528	87.7086	122.349	80.9292	52.857	72.2587	48.6845	89.8869	74.1497	NoDiff	NoDiff	P2POD			0	0	0	0	0	0	1	0	0
LOC_Os01g66190		57.1228	45.2977	69.547	53.4903	48.7249	54.6044	41.405	40.4495	4.68855	P1NOD	NoDiff				1	0	0	0	0	0	0	0	0
LOC_Os01g66210		0	0	0	0	0	0	0	0	2.31378	CPOD	NoDiff	NoDiff			0	0	0	0	0	0	1	0	1
LOC_Os01g66270	1	0	0	0.174251	0	0	0	0	0	0.142131	NoDiff	NoDiff	CPOD			0	0	0	0	0	0	1	0	1
LOC_Os01g66360		0.28069	0.343391	0	0.270582	0.33475	0.256117	7.63658	0	0	P1ND	NoDiff	NoDiff			0	1	0	0	0	0	0	0	0
LOC_Os01g66520		45.0594	33.7705	1.46052	5.62613	36.3019	46.1453	34.9289	43.0593	45.8635	NoDiff		P1ND			0	1	0	0	0	0	0	0	0
LOC_Os01g66530		0.770548	0	0.994616	0.419136	0.867746	0.487229	0.655052	3.05157	0.436843	P2ND	NoDiff	NoDiff			0	1	0	0	0	0	0	0	0
LOC_Os01g66670		19.2005	12.7921	12.182	10.9064	12.4101	20.9278	12.977	23.1218	17.0873	NoDiff	P2POD	NoDiff			0	0	0	0	0	0	1	0	0
LOC_Os01g66960		31.9337	14.8505	18.5315	14.7833	13.7081	16.8705	13.3641	22.2468	23.2239	P2PD	NoDiff	P1NPD			0	0	1	0	0	1	0	0	0
LOC_Os01g67134		921.999	432.786	226.971	451.861	387.426	303.918	183.786	0	407.038		NoDiff	P1ND			0	1	0	0	0	0	0	0	0
LOC_Os01g67290		17.4016	9.93548	13.2605	11.8049	9.45303	11.2158	10.5509	8.25646	12.1237	P1POD		P1MP	Osspr1		0	0	0	1	0	0	1	0	0
LOC_Os01g67330		9.6149	7.23913	7.20063	7.035	7.77529	9.05533	7.87863	7.71899	11.2815	P1POD	NoDiff	NoDiff			0	0	0	0	0	0	1	0	0
LOC_Os01g67440		0	0	0	0	0	0	0	0.387011	0	P2ND	NoDiff	NoDiff			0	1	0	0	0	0	0	0	0
LOC_Os01g67480	1	8.78338	13.7556	7.76717	5.65792	8.60293	6.75465	2.85756	7.8788	4.00154		NoDiff	P2ND			0	1	0	0	0	0	0	0	0
LOC_Os01g67530		13.4601	14.1468	9.06815	6.41823	10.1617	12.5679	7.55406	11.8986	11.4362	NoDiff		P2ND			0	1	0	0	0	0	0	0	0
LOC_Os01g67650		0.326087	0	0	0.033852	0	0	0.037034	0	0.035282	NoDiff	NoDiff	P1ND			0	1	0	0	0	0	0	0	0
LOC_Os01g67680		0.080169	0	0	0.066579	0	0	0	0	0.069392	CPOD	NoDiff				0	0	0	0	0	0	1	0	1
LOC_Os01g67830	1	0.615442	1.84603	2.31501	0.85816	1.95335	0.8947	2.30014	3.00682	3.83881	P2POD		P2PD			0	0	0	0	0	1	1	0	0
LOC_Os01g67850		66.369	50.888	38.3341	45.5137	38.1763	35.1446	40.9263	28.1239	35.8458	NoDiff	NoDiff	P1NOD			1	0	0	0	0	0	0	0	0
LOC_Os01g68000		2.41071	2.5864	2.03869	2.478	4.60792	4.50551	4.13117	8.93812	6.86317	P2MP		NoDiff	PLA2; LHD2		0	0	0	1	0	0	0	0	0
LOC_Os01g68010		20.7141	16.8328	19.7214	14.3997	11.1834	17.6415	22.9789	13.0661	24.7478	P1PD		NoDiff			0	0	0	0	0	1	0	0	0
LOC_Os01g68260		0	0.592237	0	0.513036	0.658266	0	0	0	0	NoDiff	P2ND				0	1	0	0	0	0	0	0	0
LOC_Os01g68269		0.043163	0.171358	0	0.10754	0.037107	0.036461	0.039216	0.076121	0.074722	NoDiff	NoDiff	P2ND			0	1	0	0	0	0	0	0	0
LOC_Os01g68410		0	0.073758	0.233634	0	0.234866	0.210549	0	0.201221	0.097498	NoDiff		P2PD			0	0	0	0	0	1	0	0	0
LOC_Os01g68580		2.42175	1.67206	0.726279	1.57401	2.08195	1.77889	1.14798	0.371381	1.00253	NoDiff	NoDiff	P1ND			0	1	0	0	0	0	0	0	0
LOC_Os01g68670		0.771573	0.289433	0.047144	0.047933	0.2507	0.528603	0.458147	0.980353	0.631043		P2PD	P1ND			0	1	0	0	0	1	0	0	0
LOC_Os01g68710		151.901	94.3836	1.27471	0.399476	0.710986	0.480507	0.431075	82.3923	0.536607	NoDiff	NoDiff	P1NOD			1	0	0	0	0	0	0	0	0
LOC_Os01g68840		74.3371	96.8874	60.4407	46.7643	79.0231	70.0091	93.068	121.643	95.6832			P2ND			0	1	0	0	0	0	0	0	0
LOC_Os01g68880		0.255594	0	0.44075	0	0	0.215909	0.696668	0	0	P1ND	NoDiff	P1PD			0	1	0	0	0	1	0	0	0
LOC_Os01g69070		0	0	0.308407	0	0.157613	0.232308	0	0	0	NoDiff		CPOD			0	0	0	0	0	0	1	0	1
LOC_Os01g69130		21.0496	15.435	55.2549	14.9206	15.8282	51.1309	13.7601	13.3449	52.174	P1POD	P2POD	P1POD			0	0	0	0	0	0	3	0	0
LOC_Os01g69150		0	0.126185	0	0	0	0.103103	0	0	0	NoDiff	CPOD	P2ND			0	1	0	0	0	0	1	0	1
LOC_Os01g69240		0	0	0	0.14659	0	0.260933	0.521204	0	0	P1ND	P1PD	NoDiff			0	1	0	0	0	1	0	0	0
LOC_Os01g69820		0.33505	0	0.219367	0.746467	0.187219	0.452012	0.632959	0	0.463888		P1MP	NoDiff			0	0	0	1	0	0	0	0	0
LOC_Os01g69904		0.071518	24.9855	14.2237	0.059395	21.4371	17.8421	0.02166	18.0316	11.1427	P2MP	P2PD	P2MP			0	0	0	2	0	1	0	0	0
LOC_Os01g69950		30.3758	21.5657	15.4767	18.507	16.0639	17.5293	18.5744	14.6176	19.0222	NoDiff	NoDiff	P1ND			0	1	0	0	0	0	0	0	0
LOC_Os01g70010		8.36323	0	0	5.21655	0	3.96151	6.04726	0	22.7059	P1POD	NoDiff	NoDiff			0	0	0	0	0	0	1	0	0
LOC_Os01g70080		2.0281	3.17825	0.809896	2.00344	1.86017	2.10994	1.49351	1.35004	1.39097	NoDiff	NoDiff	P2ND			0	1	0	0	0	0	0	0	0
LOC_Os01g70170		335.944	235.446	389.515	273.406	273.894	401.485	321.07	352.933	295.637	NoDiff	P2POD	P1PD			0	0	0	0	0	1	1	0	0
LOC_Os01g70210		0.751006	2.53784	0	0.267301	2.91571	1.06921	0.487381	3.06138	1.34654			P2ND			0	1	0	0	0	0	0	0	0
LOC_Os01g70270	1	341.741	290.985	472.618	319.654	350.756	512.146	302.523	482.232	77.3558	P2ND	NoDiff	NoDiff			0	1	0	0	0	0	0	0	0
LOC_Os01g70290		0.056724	0.337795	0.154876	0.282655	0.097531	0.431254	0	0.400148	0.196398	P2MP	P1PD				0	0	0	1	0	1	0	0	0
LOC_Os01g70340		1.60237	1.29351	1.86245	1.41667	1.24874	0.560735	1.50967	2.53329	0.970816	P2ND	NoDiff	NoDiff			0	1	0	0	0	0	0	0	0
LOC_Os01g70460		2.57389	2.38429	2.66307	1.92383	2.1144	3.14058	3.27394	2.06785	3.76266	P1PD	P2PD	NoDiff			0	0	0	0	0	2	0	0	0
LOC_Os01g70470		46.1668	36.3753	38.2745	34.1487	27.4902	41.0234	36.1156	28.7296	40.8982	P1PD	P1POD				0	0	0	0	0	1	1	0	0
LOC_Os01g70480		7.84966	10.1833	9.8047	6.80431	8.15051	11.7888	7.07879	8.03844	8.11882	NoDiff	P2POD	NoDiff			0	0	0	0	0	0	1	0	0
LOC_Os01g70560		77.0504	61.5117	39.3704	54.8907	54.4689	44.2045	55.8911	68.4344	56.7182	NoDiff	NoDiff	P1ND			0	1	0	0	0	0	0	0	0
LOC_Os01g70570		41.8525	32.232	31.8782	38.7493	32.5551	37.5056	4.13867	32.3411	45.8207	P2PD	NoDiff	NoDiff			0	0	0	0	0	1	0	0	0
LOC_Os01g70670		34.9992	65.3947	120.075	96.2618	98.1034	67.9253	76.2083	65.0938	81.987	NoDiff	NoDiff	P2POD			0	0	0	0	0	0	1	0	0
LOC_Os01g70720		5.35762	49.3353	32.0285	5.01006	41.2052	32.445	4.07036	50.0045	32.0044	P2MP		P2MP			0	0	0	2	0	0	0	0	0
LOC_Os01g70730		166.61	112.526	95.7685	92.5462	28.5105	59.0675	19.8043	19.5377	17.4352	NoDiff	NoDiff	P1ND			0	1	0	0	0	0	0	0	0
LOC_Os01g70740		33.7623	32.5091	19.1063	21.0563	32.3711	36.9683	32.5943	27.7857	35.49	NoDiff	P2PD	P1NOD			1	0	0	0	0	1	0	0	0
LOC_Os01g70780		68.2852	69.0365	61.6008	55.4731	61.1229	63.5509	48.6721	72.9291	59.676	P2MP		NoDiff			0	0	0	1	0	0	0	0	0
LOC_Os01g70800		10.1515	7.91228	11.3069	8.87603	11.2296	15.2347	10.005	11.0588	12.4623	NoDiff	P2POD	NoDiff			0	0	0	0	0	0	1	0	0
LOC_Os01g70860		3.01809	2.88287	0.85877	1.39707	5.73311	1.99824	2.18685	6.05863	3.05654		P2ND	P1NOD			1	1	0	0	0	0	0	0	0
LOC_Os01g70880		0	0	0	0	0	0.126568	0	0	0	NoDiff	CPOD	NoDiff			0	0	0	0	0	0	1	0	1
LOC_Os01g70900		1.88869	0.57355	0.81072	0.698697	0.680718	1.69675	3.08359	1.20404	1.84359		P1POD				0	0	0	0	0	0	1	0	0
LOC_Os01g70930		3.18404	2.52665	0.313725	0.856847	1.75773	1.80577	0.743826	0.320845	0.118105	NoDiff	NoDiff	P1ND			0	1	0	0	0	0	0	0	0
LOC_Os01g71070		0	0	0	0	0	0.074201	0	0	0	NoDiff	CPOD	NoDiff			0	0	0	0	0	0	1	0	1
LOC_Os01g71080		0	0	0.075028	0	0	0	0	0	0	NoDiff	NoDiff	CPOD			0	0	0	0	0	0	1	0	1
LOC_Os01g71180		4.85389	4.13363	4.82682	4.13399	3.47948	5.11175	3.80688	4.0781	4.71537	NoDiff	P1PD	NoDiff			0	0	0	0	0	1	0	0	0
LOC_Os01g71230		479.934	297.231	241.124	497.789	448.442	112.089	511.854	368.514	454.74	NoDiff	P1NOD	NoDiff			1	0	0	0	0	0	0	0	0
LOC_Os01g71540		0.902183	320.254	188.294	0.222751	317.262	175.07	2.20891	341.244	187.606	P2MP	P2MP	P2MP			0	0	0	3	0	0	0	0	0
LOC_Os01g71590		0.901405	341.281	203.697	0.228741	307.6	181.383	2.02034	332.597	181.536	P2MP	P2MP	P2MP			0	0	0	3	0	0	0	0	0
LOC_Os01g71620		0.074531	17.7612	12.8672	0.132079	13.7134	10.0957	0.484518	11.7256	7.82064			P2MP			0	0	0	1	0	0	0	0	0
LOC_Os01g71630		0.829083	266.482	150.032	0.333166	207.932	128.069	1.84673	213.536	133.245	P2MP	P2MP	P2MP			0	0	0	3	0	0	0	0	0
LOC_Os01g71690		4.54601	2.36701	4.93318	9.30177	3.60055	4.31612	4.07799	3.88823	4.47262	NoDiff	P1ND				0	1	0	0	0	0	0	0	0
LOC_Os01g71790	1	5.97053	5.02827	2.24311	3.06676	3.17826	2.94947	2.86132	5.79541	4.2667	NoDiff	NoDiff	P1ND			0	1	0	0	0	0	0	0	0
LOC_Os01g71810		1.13023	1.60251	0.74247	0.49167	3.00747	2.50052	1.46697	5.78983	3.72685	P2MP		NoDiff			0	0	0	1	0	0	0	0	0
LOC_Os01g71820		1.27174	1.99849	1.0965	0.616096	3.55322	2.90676	1.82946	7.09532	4.62799	P2MP		NoDiff			0	0	0	1	0	0	0	0	0
LOC_Os01g71830		0.216175	0.536384	0.279581	0.314178	1.67258	0.958701	0.491018	3.9991	1.82437	P2MP	NoDiff	NoDiff	OsGLN1		0	0	0	1	0	0	0	0	0
LOC_Os01g71870		0.081369	0.084124	0	0	0	0	0	0	0.070431	NoDiff	NoDiff	CNOD			1	0	0	0	0	0	0	1	0
LOC_Os01g71910		0.236941	0.695317	1.24909	0.298429	0.274045	0.566444	0.693281	0.343936	0.320979	NoDiff	NoDiff	P2PD			0	0	0	0	0	1	0	0	0
LOC_Os01g71930		0.036781	8.12125	5.62302	0	9.74999	5.9249	0.050127	11.3979	5.61594	P2MP	P2MP	P2MP	Osg1		0	0	0	3	0	0	0	0	0
LOC_Os01g72080		66.7038	110.437	55.5925	55.2256	176.336	110.773	115.401	244.98	162.444	P2MP	P2MP				0	0	0	2	0	0	0	0	0
LOC_Os01g72110		0.485355	0.959263	1.51523	1.32087	0.967595	0.760401	0.841631	0.694331	1.81172	P1PD	NoDiff				0	0	0	0	0	1	0	0	0
LOC_Os01g72290		0.677295	0.517091	0.269524	0.259609	0.358315	0.220052	1.04138	0.367521	1.26269	P1PD	NoDiff	NoDiff			0	0	0	0	0	1	0	0	0
LOC_Os01g72500		0	0	0.368195	0.7093	0.09178	0.315641	0	0	0.138612	NoDiff		CPOD			0	0	0	0	0	0	1	0	1
LOC_Os01g72510		10.7903	18.0452	10.2918	8.52767	16.1401	19.7539	5.27888	10.8042	7.08183	NoDiff	P2PD				0	0	0	0	0	1	0	0	0
LOC_Os01g72550		0.295585	0	0	0	0	0	0	0	0	NoDiff	NoDiff	P1ND	OsCML19		0	1	0	0	0	0	0	0	0
LOC_Os01g72560		0.528698	0	0	0	0.095292	0.129063	0.616842	0	0	P1ND	NoDiff	P1ND			0	2	0	0	0	0	0	0	0
LOC_Os01g72630		23.8374	1.53946	12.9924	21.5738	1.07682	10.9708	25.1712	1.85459	8.62025	P1NPD	P1MP	P1MP			0	0	1	2	0	0	0	0	0
LOC_Os01g72650		5.46965	40.4712	27.5	4.96616	32.6697	25.133	5.27477	28.9479	19.8008	P2MP		P2MP			0	0	0	2	0	0	0	0	0
LOC_Os01g72660		1.6482	1.67257	0.741227	0.924363	0.587334	1.5005	0	0.722909	0.591355	NoDiff		P2NOD			1	0	0	0	0	0	0	0	0
LOC_Os01g72670		5.0649	23.5815	14.0991	4.4574	17.8915	13.6	4.89092	18.4193	12.7899			P2MP	LCD		0	0	0	1	0	0	0	0	0
LOC_Os01g72710		8.40595	5.61492	8.25351	6.20805	5.76355	10.7556	7.56943	8.44951	8.27089	NoDiff	P1PD	NoDiff			0	0	0	0	0	1	0	0	0
LOC_Os01g72970		3.44859	2.43688	3.11302	2.8832	3.1086	4.03023	3.7544	2.99165	3.84354		P2POD	NoDiff			0	0	0	0	0	0	1	0	0
LOC_Os01g73005		0.347873	0	0	1.01654	0.188889	0.112975	0	0.226671	0.077175	NoDiff	P1ND	P1ND			0	2	0	0	0	0	0	0	0
LOC_Os01g73160		195.347	148.748	140.971	132.961	141.124	169.494	174.308	189.918	301.075	P2POD	NoDiff				0	0	0	0	0	0	1	0	0
LOC_Os01g73170		9.92711	19.8099	6.57018	6.08392	17.0429	7.64001	3.38843	5.32431	3.49713	NoDiff		P2ND			0	1	0	0	0	0	0	0	0
LOC_Os01g73234		39.585	35.1447	21.1025	32.2213	20.9889	31.0166	20.9754	14.4864	25.3333	NoDiff	NoDiff	P1ND			0	1	0	0	0	0	0	0	0
LOC_Os01g73480		0	0.096048	0	0	0	0	0	0.127998	0	P2ND	NoDiff				0	1	0	0	0	0	0	0	0
LOC_Os01g73540		0	0	0.274938	0	0	0	0	0	0	NoDiff	NoDiff	CPOD			0	0	0	0	0	0	1	0	1
LOC_Os01g73630		0	0	0.37495	0	0	0	0	0	0	NoDiff	NoDiff	CPOD			0	0	0	0	0	0	1	0	1
LOC_Os01g73640		0	33.6621	22.1934	0	26.0617	17.6605	0.210138	19.1736	16.6871	P2PD	P2PPD	P2PPD			0	0	0	0	2	1	0	0	0
LOC_Os01g73656		0	21.635	14.9904	0	23.3381	14.09	0	25.3145	15.2015	P2MP	P2MP	P2PPD			0	0	0	2	1	0	0	0	0
LOC_Os01g73662		0	0.099062	0.258173	0	0.13586	0.084314	0	0	0.043196	NoDiff	NoDiff	P2PD			0	0	0	0	0	1	0	0	0
LOC_Os01g73670		0.279229	62.869	46.7065	0.346175	68.9542	39.4437	0.380543	66.1842	42.5559	P2MP	P2MP	P2MP			0	0	0	3	0	0	0	0	0
LOC_Os01g73680		2.41909	6.34575	3.52001	2.43774	3.96958	5.03856	2.77026	7.79114	5.18769	P2MP					0	0	0	1	0	0	0	0	0
LOC_Os01g73690		4.95332	11.7019	10.2339	5.34027	10.7903	10.8211	6.59428	10.3122	9.17439		P2PD				0	0	0	0	0	1	0	0	0
LOC_Os01g73810		1.09047	3.08038	0.289296	0.766298	4.98028	1.84231	0.457272	3.24524	1.1012	P2ND	P2NPD	P2NOD			1	1	1	0	0	0	0	0	0
LOC_Os01g73840		47.5361	43.4123	30.6873	14.0287	43.3337	38.2124	36.2829	25.7905	34.3506	NoDiff		P1ND			0	1	0	0	0	0	0	0	0
LOC_Os01g73880		163.041	116.288	114.214	112.747	93.4394	204.089	97.4371	88.7752	181.122		P1POD	NoDiff			0	0	0	0	0	0	1	0	0
LOC_Os01g73950		42.625	36.8535	49.048	9.7509	9.25623	44.8013	36.2815	38.6993	37.5723	NoDiff	P1POD	NoDiff			0	0	0	0	0	0	1	0	0
LOC_Os01g73970		16.737	14.297	57.3422	11.758	13.5913	15.8458	11.1389	10.3896	11.4412	NoDiff	NoDiff	P1POD			0	0	0	0	0	0	1	0	0
LOC_Os01g74030		73.1467	45.4746	74.6574	59.273	49.7619	55.6577	56.7225	47.6707	59.1884		NoDiff	P1PD			0	0	0	0	0	1	0	0	0
LOC_Os01g74120		39.0476	52.2693	28.572	23.6566	38.9326	28.922	21.6721	47.5868	33.989		NoDiff	P2ND			0	1	0	0	0	0	0	0	0
LOC_Os01g74180		48.68	39.3019	45.8606	41.7454	33.0332	21.8046	32.7038	33.3781	32.9025	NoDiff	P1NOD	NoDiff			1	0	0	0	0	0	0	0	0
LOC_Os01g74200		2.84329	0.135047	0.469277	2.502	0.427337	1.41375	2.95791	0.299954	1.96915	P1MP	P1MP	P1ND			0	1	0	2	0	0	0	0	0
LOC_Os01g74300		11.7551	37.6524	7.9605	5.19841	10.6478	5.30932	3.34116	5.9322	1.21906	NoDiff	NoDiff	P2ND			0	1	0	0	0	0	0	0	0
LOC_Os01g74390		2.04386	1.59548	3.36606	2.60244	1.65468	3.06505	1.63673	1.01249	2.00764	NoDiff	NoDiff	P1PD			0	0	0	0	0	1	0	0	0
LOC_Os01g74450		3.42305	4.22377	1.99417	1.80556	1.74974	1.32855	0.588386	2.12101	0.880862	NoDiff	NoDiff	P2ND	OsTIP1;2; OsTIP1		0	1	0	0	0	0	0	0	0
LOC_Os01g74530		32.3527	22.979	29.0133	28.5436	21.2298	31.2381	23.9808	20.2454	27.8144	P1PD	P1PD				0	0	0	0	0	2	0	0	0
LOC_Os01g74540	1	60.554	63.1409	42.0422	38.1574	62.0591	75.6014	44.0639	68.6898	61.9135	NoDiff	P2PD	NoDiff			0	0	0	0	0	1	0	0	0
LOC_Os01g74580		24.8327	32.2182	32.8805	15.2145	30.0046	34.1629	23.881	20.5808	26.5153	NoDiff	P2PD	NoDiff			0	0	0	0	0	1	0	0	0
LOC_Os01g74650		33.2285	19.8084	14.3621	27.7092	36.2308	22.3781	25.5175	36.4985	16.0782	P2ND					0	1	0	0	0	0	0	0	0
LOC_Os02g01100		51.5114	25.1871	35.0576	35.7529	27.1559	43.5423	41.2242	28.2582	51.8726	P1PD	P1PD				0	0	0	0	0	2	0	0	0
LOC_Os02g01130		46.8811	37.9399	27.7412	40.2591	46.1332	51.1433	32.6482	44.8597	38.4937	NoDiff		P1NOD			1	0	0	0	0	0	0	0	0
LOC_Os02g01180		22.1607	17.7337	33.9835	12.5281	24.888	13.0616	28.0409	23.4182	13.3385		NoDiff	P1PD			0	0	0	0	0	1	0	0	0
LOC_Os02g01250		338.839	164.754	168.981	168.174	171.603	175.023	161.741	167.024	145.112	NoDiff	NoDiff	P1ND			0	1	0	0	0	0	0	0	0
LOC_Os02g01280		39.5261	27.6405	69.417	40.7493	43.3367	46.15	36.7692	22.7702	45.092	NoDiff	NoDiff	P1PD			0	0	0	0	0	1	0	0	0
LOC_Os02g01332		398.435	267.944	182.389	238.231	235.375	308.573	341.787	399.629	396.721	NoDiff	NoDiff	P1ND			0	1	0	0	0	0	0	0	0
LOC_Os02g01350		43.0097	29.8628	48.7182	37.4617	29.7562	35.9302	29.4326	29.8294	32.3593	NoDiff	NoDiff	P1PD			0	0	0	0	0	1	0	0	0
LOC_Os02g01500		14.1302	10.4985	20.9133	12.0352	15.5869	18.0287	10.9597	11.136	14.1119	NoDiff		P1POD			0	0	0	0	0	0	1	0	0
LOC_Os02g01510		79.1519	58.854	43.3393	53.4337	51.6484	45.4095	48.9215	49.2291	53.5014	NoDiff	NoDiff	P1NOD			1	0	0	0	0	0	0	0	0
LOC_Os02g01780		0	0	0	0	0	1.23937	1.10193	0	0	P1ND	CPOD	NoDiff			0	1	0	0	0	0	1	0	1
LOC_Os02g01810		0	0	0	0	0	0	0	0	1.6918	CPOD	NoDiff	NoDiff			0	0	0	0	0	0	1	0	1
LOC_Os02g01870		2.37448	13.2048	5.96009	1.05541	12.4516	9.17036	0.654374	12.5965	8.02537	P2MP	P2MP	P2MP			0	0	0	3	0	0	0	0	0
LOC_Os02g01930		3.97933	2.53628	1.1278	2.39384	2.69304	2.56844	5.18167	5.86628	4.54662		NoDiff	P1NOD			1	0	0	0	0	0	0	0	0
LOC_Os02g01970		12.22	11.3004	14.3206	12.0358	9.13129	10.7864	8.95716	8.01611	11.9939	P1POD	NoDiff				0	0	0	0	0	0	1	0	0
LOC_Os02g01980		14.1973	10.3001	6.81419	7.9251	9.28704	12.0092	5.64377	7.77698	7.01991	NoDiff	NoDiff	P1ND			0	1	0	0	0	0	0	0	0
LOC_Os02g02270		150.225	63.1121	107.91	116.166	64.2164	113.387	125.306	65.4502	107.255			P1MP			0	0	0	1	0	0	0	0	0
LOC_Os02g02350		38.8373	33.6964	93.8056	34.8635	34.2727	38.2342	27.526	26.1125	27.2856	NoDiff	NoDiff	P1POD			0	0	0	0	0	0	1	0	0
LOC_Os02g02480	1	8.91142	32.2808	38.1298	30.6313	5.93262	5.78945	4.50114	7.48939	6.3633	NoDiff		P2PD			0	0	0	0	0	1	0	0	0
LOC_Os02g02520		10.2471	13.5494	10.5002	9.14717	10.9544	9.67673	7.5561	6.43186	11.1295	P1PD	NoDiff	NoDiff			0	0	0	0	0	1	0	0	0
LOC_Os02g02550		0.157882	3.2028	4.70111	1.42325	0.495165	0.780703	2.70056	2.13913	2.15108	NoDiff	NoDiff	P2PD			0	0	0	0	0	1	0	0	0
LOC_Os02g02620		17.3253	20.8947	17.2122	16.1031	21.0416	21.8042	16.7779	10.6687	24.4905	P1PD	NoDiff	NoDiff			0	0	0	0	0	1	0	0	0
LOC_Os02g02650		0	0	0	0	0	0	0	2.06842	0	P2ND	NoDiff	NoDiff			0	1	0	0	0	0	0	0	0
LOC_Os02g02660		7.81321	0.44884	5.35558	7.41199	0.584723	4.60406	5.84164	0.699982	3.58688		P1MP				0	0	0	1	0	0	0	0	0
LOC_Os02g02670		20.0249	22.3753	28.6655	16.2146	20.13	29.4073	13.6644	23.3606	23.7027		P2POD	P2PD			0	0	0	0	0	1	1	0	0
LOC_Os02g02740		10.2666	7.38217	6.65154	9.32701	6.3892	11.8744	6.32562	7.77015	7.07533	NoDiff	P1PD				0	0	0	0	0	1	0	0	0
LOC_Os02g02830		0.554106	0.54995	0	0	0	0	0	0	0	NoDiff	NoDiff	CNOD			1	0	0	0	0	0	0	1	0
LOC_Os02g02960		2.09979	1.16111	1.6806	3.05675	2.2271	2.42723	2.64677	80.7548	4.10378	P2ND	NoDiff	NoDiff			0	1	0	0	0	0	0	0	0
LOC_Os02g03260		29.3664	18.888	18.2824	20.2993	9.87962	31.9492	29.2805	8.80455	25.2092		P1POD				0	0	0	0	0	0	1	0	0
LOC_Os02g03294		0.31365	1.49423	0	0.62516	1.67003	0.900834	1.02589	1.43816	1.35744	NoDiff		P2ND			0	1	0	0	0	0	0	0	0
LOC_Os02g03340		13.4699	12.2898	16.5904	21.1713	12.4699	15.706	17.3297	10.1985	18.4856	P1PD					0	0	0	0	0	1	0	0	0
LOC_Os02g03400		0.244103	0.410731	0	0.077697	0.160856	0.210744	0.16678	0.216247	0.134965	NoDiff	NoDiff	P2ND			0	1	0	0	0	0	0	0	0
LOC_Os02g03440		41.1026	0	0	0	0	0	0	0	38.9007	CPOD	NoDiff				0	0	0	0	0	0	1	0	1
LOC_Os02g03540		69.0627	20.4871	24.0188	15.9222	13.9456	65.9555	45.2856	18.3724	19.5504	P1ND	P1POD	P1ND			0	2	0	0	0	0	1	0	0
LOC_Os02g03560		24.7609	20.7685	5.0535	23.3684	18.6285	24.8418	19.3567	19.6807	21.3646	NoDiff	NoDiff	P1ND			0	1	0	0	0	0	0	0	0
LOC_Os02g03580	1	36.0676	17.3189	34.3717	35.9994	28.1057	38.3904	25.7397	24.4092	33.3041	P1PD					0	0	0	0	0	1	0	0	0
LOC_Os02g03640		82.174	19.0103	79.3707	63.6781	17.6745	74.7492	63.8694	17.8372	55.8386		P1PD	P1PD			0	0	0	0	0	2	0	0	0
LOC_Os02g03700		13.2162	8.2816	14.3827	10.032	9.96766	11.1065	10.4966	7.52166	10.4768	NoDiff	NoDiff	P1PD			0	0	0	0	0	1	0	0	0
LOC_Os02g03710		4.16338	13.5456	5.40831	2.1977	11.7119	6.03348	2.76048	8.63508	4.32658		P2MP	P2ND			0	1	0	1	0	0	0	0	0
LOC_Os02g03740		2.86194	3.21564	4.78531	3.23926	2.29496	5.63401	2.50212	2.28552	2.75766	NoDiff	P1POD	NoDiff			0	0	0	0	0	0	1	0	0
LOC_Os02g03880		38.4776	16.2242	9.41134	20.6741	27.4774	25.3677	37.9095	24.9302	33.2733	NoDiff	NoDiff	P1ND			0	1	0	0	0	0	0	0	0
LOC_Os02g03960	1	158.107	85.3471	99.3449	104.019	87.5835	99.0092	103.704	95.8721	100.308	NoDiff	NoDiff	P1ND			0	1	0	0	0	0	0	0	0
LOC_Os02g03970		24.633	19.7204	36.0884	25.251	18.3495	22.1701	26.7691	20.9551	24.5518	NoDiff	NoDiff	P1POD			0	0	0	0	0	0	1	0	0
LOC_Os02g04050		88.1645	32.9048	67.8668	69.5838	30.904	48.0613	38.5028	21.5844	36.1937	NoDiff	P1MP	P1MP			0	0	0	2	0	0	0	0	0
LOC_Os02g04060		16.165	14.9963	0	5.23847	4.06436	9.74315	0	0	0.712968	NoDiff	NoDiff	CNOD			1	0	0	0	0	0	0	1	0
LOC_Os02g04080		9.9645	6.13998	9.22503	6.99382	0.831415	5.40988	1.19592	0.36879	5.57249	P1POD		NoDiff			0	0	0	0	0	0	1	0	0
LOC_Os02g04140		0.101616	1.2722	0.385503	0.185314	0.995884	1.08958	0.203114	1.68453	1.03788	P2MP	P2PD				0	0	0	1	0	1	0	0	0
LOC_Os02g04160		1.20044	4.32671	0.852373	0.821017	7.77036	4.45673	1.73224	6.69679	2.41896	P2ND	P2MP	P2ND	OsTEF1		0	2	0	1	0	0	0	0	0
LOC_Os02g04390		0	2.93979	0	0	0.971338	0.954439	0	0	0.553873	NoDiff		P2ND			0	1	0	0	0	0	0	0	0
LOC_Os02g04460		36.7206	31.5646	17.9136	28.7706	25.6797	23.9283	35.052	45.5832	38.9129	NoDiff	NoDiff	P1NOD			1	0	0	0	0	0	0	0	0
LOC_Os02g04630		0	0	0	0	0	0.254911	0	0	0	NoDiff	CPOD	NoDiff			0	0	0	0	0	0	1	0	1
LOC_Os02g04660		28.1378	4.6187	5.93658	11.2904	8.29147	12.2996	4.21994	10.6892	2.28618	NoDiff	NoDiff	P1ND	OsPRMT5		0	1	0	0	0	0	0	0	0
LOC_Os02g04730		1.0645	3.83548	2.72354	0.845301	3.85338	6.3818	2.66266	6.31348	5.12654		P2POD	NoDiff			0	0	0	0	0	0	1	0	0
LOC_Os02g04820		9.43046	0.466724	4.37889	5.52396	0	4.11757	5.20884	0.248793	3.62262			P1MP			0	0	0	1	0	0	0	0	0
LOC_Os02g04900		6.96666	0.303699	2.20958	3.80127	0.131529	2.82177	5.58633	0.410349	2.63297	P1MP		P1MP			0	0	0	2	0	0	0	0	0
LOC_Os02g04915		12.3748	0	3.58182	7.40031	0	4.7985	6.93668	0	3.79017	P1MP	P1MP	P1NPD			0	0	1	2	0	0	0	0	0
LOC_Os02g04980		0.11017	3.29553	1.61658	0.219588	2.0459	1.90248	0	1.89665	1.02494	NoDiff		P2MP			0	0	0	1	0	0	0	0	0
LOC_Os02g05000		44.9612	0.79416	22.0604	40.8472	0.312676	26.599	39.4503	0.577277	28.2004	P1PPD	P1MP	P1MP			0	0	0	2	1	0	0	0	0
LOC_Os02g05070		0	0	0	0	0	0.050281	0.05408	0.104971	0	CNOD	CPOD	NoDiff			1	0	0	0	0	0	1	1	1
LOC_Os02g05080		0.992793	0	0	0.377967	0	0.460595	0.789356	0.148788	0.255928			P1ND			0	1	0	0	0	0	0	0	0
LOC_Os02g05160		0.070999	0	0.285671	0.157236	0.142418	0.139941	0.215021	0.162744	0.159755	NoDiff	NoDiff	P1PD			0	0	0	0	0	1	0	0	0
LOC_Os02g05190		0.546784	0	0.188577	0.09082	0	0.369509	0.645821	0.289284	0.567938		P1POD				0	0	0	0	0	0	1	0	0
LOC_Os02g05250		35.0341	27.6082	22.1741	24.9922	27.8761	47.4051	34.0506	33.6531	35.6716	NoDiff	P2POD	NoDiff			0	0	0	0	0	0	1	0	0
LOC_Os02g05310		229.066	168.741	250.135	219.855	174.207	12.0206	199.97	196.432	10.799	P1NOD	P1NOD	NoDiff			2	0	0	0	0	0	0	0	0
LOC_Os02g05340		82.6416	49.6754	62.2743	63.7425	51.3566	71.282	57.8047	64.7775	56.6188	NoDiff	P1PD	P1MP			0	0	0	1	0	1	0	0	0
LOC_Os02g05350		52.3045	2.74207	18.6236	35.9748	3.13086	24.284	44.9283	3.10057	25.3429	P1MP					0	0	0	1	0	0	0	0	0
LOC_Os02g05370		26.747	11.5293	17.0185	21.8922	8.29702	25.6765	24.6692	7.03765	21.9078	P1PD	P1PD	P1MP			0	0	0	1	0	2	0	0	0
LOC_Os02g05390		0.708024	1.36153	0	0.740725	1.07992	1.33662	0.742484	0.669451	1.9751	P1POD	NoDiff	P2ND			0	1	0	0	0	0	1	0	0
LOC_Os02g05400		7.07888	3.16594	4.46875	6.90624	3.21688	4.66995	4.4951	0.831309	5.78995	P1PD	NoDiff	NoDiff			0	0	0	0	0	1	0	0	0
LOC_Os02g05440		35.9923	11.698	25.6858	21.3122	13.8708	30.4494	23.1576	9.0744	20.2101		P1POD	P1MP			0	0	0	1	0	0	1	0	0
LOC_Os02g05450	1	94.1318	64.0572	99.0572	84.519	66.279	81.4717	70.0201	66.9749	71.1321	NoDiff	NoDiff	P1PD			0	0	0	0	0	1	0	0	0
LOC_Os02g05510	1	26.1697	13.651	21.0745	21.723	14.9599	24.7664	25.1922	20.4144	19.3727		P1PD		OsTIFY2a		0	0	0	0	0	1	0	0	0
LOC_Os02g05580		0	0	0	0.034302	0	0	0	0	0	NoDiff	P1ND	NoDiff			0	1	0	0	0	0	0	0	0
LOC_Os02g05810		14.5415	6.88569	10.818	11.0568	4.6	5.77038	9.96132	12.8436	6.54022	P2NOD		P1MP			1	0	0	1	0	0	0	0	0
LOC_Os02g06000		0.99303	1.40049	1.03415	0.845934	1.45704	2.17556	1.48581	1.4747	1.33455	NoDiff	P2PD	NoDiff			0	0	0	0	0	1	0	0	0
LOC_Os02g06220		0	0.162736	0	0	0.49336	0.138508	0	0	0.070962	NoDiff	P2MP				0	0	0	1	0	0	0	0	0
LOC_Os02g06250		1.89218	1.07675	2.46353	2.50408	1.20031	2.06891	1.93852	1.58659	2.05221	NoDiff	NoDiff	P1PD			0	0	0	0	0	1	0	0	0
LOC_Os02g06290		0	0	0	0	0	5.19158	0	0	0	NoDiff	CPOD	NoDiff			0	0	0	0	0	0	1	0	1
LOC_Os02g06310		0	0	0	0	0	0.329189	0	0.333932	0.210819	P2MP	CPOD	NoDiff			0	0	0	1	0	0	1	0	1
LOC_Os02g06350		0.154387	0	2.07648	0	0	0.175332	0	0	0	NoDiff	NoDiff	P1POD			0	0	0	0	0	0	1	0	0
LOC_Os02g06500		59.9744	43.5578	59.7964	55.9818	41.5493	52.3061	46.0009	41.0762	50.8949	P1PD		P1PD			0	0	0	0	0	2	0	0	0
LOC_Os02g06600		0.257955	0	0.444822	0.119016	0.098561	0.290537	0.182285	0	0.148853	NoDiff	NoDiff	P1PD			0	0	0	0	0	1	0	0	0
LOC_Os02g06650		179.129	79.807	63.9365	58.8988	46.912	118.222	135.187	55.3313	58.081		P1POD	P1ND			0	1	0	0	0	0	1	0	0
LOC_Os02g06690		0	0.887292	0	0	0	0.617492	0	0	0	NoDiff	CPOD	P2ND			0	1	0	0	0	0	1	0	1
LOC_Os02g06730		0	0.326706	0	0	0.282988	0	0	0.332588	0.973495	P2POD	NoDiff	NoDiff			0	0	0	0	0	0	1	0	0
LOC_Os02g06754		0	57.2481	29.127	0	62.0133	32.3111	0	44.1365	26.9136	P2MP	P2MP	P2MP			0	0	0	3	0	0	0	0	0
LOC_Os02g06760		0	82.6572	40.7735	0	77.6399	42.1899	0	94.5437	53.7581	P2MP		P2MP			0	0	0	2	0	0	0	0	0
LOC_Os02g06770		0	28.7859	15.6576	0	17.6344	31.1885	0	42.7765	36.6627	P2PD	P2POD	P2MP			0	0	0	1	0	1	1	0	0
LOC_Os02g06880		8.60114	5.33721	7.64513	5.73787	5.70438	8.2076	7.31944	5.97059	7.72484	NoDiff	P1POD				0	0	0	0	0	0	1	0	0
LOC_Os02g06910	1	164.014	186.921	215.829	150.843	159.992	128.831	117.643	109.802	134.154	NoDiff	NoDiff	P2PD			0	0	0	0	0	1	0	0	0
LOC_Os02g07070		47.5345	20.7712	52.2694	44.3	36.7069	44.1909	28.5539	34.894	51.8087	P2POD	NoDiff	P1PD			0	0	0	0	0	1	1	0	0
LOC_Os02g07090		0.704189	0	0.539695	0.974702	0.574662	0.528756	1.56395	0	1.28433	P1PD	NoDiff				0	0	0	0	0	1	0	0	0
LOC_Os02g07110		8.80818	10.4983	7.48271	8.46699	19.2957	8.26044	20.634	32.1275	22.4923		P2ND	NoDiff			0	1	0	0	0	0	0	0	0
LOC_Os02g07150		3.49422	2.99986	3.71953	2.96086	2.92914	2.7157	3.07069	3.63435	6.36332	P2POD	NoDiff	NoDiff			0	0	0	0	0	0	1	0	0
LOC_Os02g07260		404.748	235.963	207.094	322.58	274.285	276.125	329.16	317.981	377.707	NoDiff	NoDiff	P1ND			0	1	0	0	0	0	0	0	0
LOC_Os02g07270		0	0	0	0	0	0	0	0	0.103324	CPOD	NoDiff	NoDiff			0	0	0	0	0	0	1	0	1
LOC_Os02g07310		13.6757	9.99935	15.787	13.2927	9.46771	11.041	7.56353	9.94056	8.4198	NoDiff	NoDiff	P1PD			0	0	0	0	0	1	0	0	0
LOC_Os02g07390		0	0.43342	0.18826	0	0	0.203657	0	0.385067	0.533518	P2PD	NoDiff	NoDiff			0	0	0	0	0	1	0	0	0
LOC_Os02g07510		0	0.442312	0	0	0.09073	0.400428	0.303676	0.392966	0.289309	NoDiff	P2POD	P2ND			0	1	0	0	0	0	1	0	0
LOC_Os02g07560		0.082922	1.54416	0.246184	0.223813	0.944552	0.904608	0.565045	0.804305	0.601526	NoDiff		P2ND			0	1	0	0	0	0	0	0	0
LOC_Os02g07570		4.17181	6.74546	5.6633	3.69837	5.15805	7.54879	3.72806	4.55292	4.80562	NoDiff	P2PD	NoDiff			0	0	0	0	0	1	0	0	0
LOC_Os02g07650		83.1137	28.2049	50.1162	62.3956	23.3257	51.336	60.2917	31.7242	55.0801			P1MP			0	0	0	1	0	0	0	0	0
LOC_Os02g07709		0	3.34855	1.45448	0.063681	3.57613	1.788	0	1.81429	2.70323	P2PD	P2MP	P2MP			0	0	0	2	0	1	0	0	0
LOC_Os02g07720		55.7906	49.374	111.312	33.575	89.5425	102.317	40.2811	35.9062	113.965	P1POD		P1POD			0	0	0	0	0	0	2	0	0
LOC_Os02g07830		5.19321	5.51038	9.0135	6.91593	5.85543	7.00558	5.60426	4.84197	4.90156	NoDiff	NoDiff	P2POD	OsHKT1;3		0	0	0	0	0	0	1	0	0
LOC_Os02g07840	1	1.66073	0.949358	6.60179	0.589688	6.76712	14.5249	1.43974	6.94646	1.55645	NoDiff	P2POD	NoDiff			0	0	0	0	0	0	1	0	0
LOC_Os02g07910		309.767	277.647	193.559	293.056	356.967	305.106	281.29	275.326	290.43	NoDiff		P1NOD			1	0	0	0	0	0	0	0	0
LOC_Os02g07950		0	0	0.32863	0	0	0.160985	0.173149	0	0.082478	NoDiff	NoDiff	CPOD			0	0	0	0	0	0	1	0	1
LOC_Os02g08018		0	0	0	0.230609	2.81584	0	0.441256	0	3.92912	P1POD	NoDiff	NoDiff			0	0	0	0	0	0	1	0	0
LOC_Os02g08030		2.47824	0	0	1.13966	0.933291	0.433703	0	0	0	NoDiff	NoDiff	P1ND			0	1	0	0	0	0	0	0	0
LOC_Os02g08040		0.270312	0.598962	0	0	0	0	0	0	0	NoDiff	NoDiff	P2ND			0	1	0	0	0	0	0	0	0
LOC_Os02g08190		60.6133	47.3805	63.6859	44.6457	40.4288	54.0714	39.9684	41.8233	47.8838	NoDiff	P1PD				0	0	0	0	0	1	0	0	0
LOC_Os02g08330		12.2766	2.01594	1.95732	6.74332	1.09724	5.63415	5.19697	1.57484	3.95309		P1PD	P1ND			0	1	0	0	0	1	0	0	0
LOC_Os02g08350		64.4999	43.7075	58.2331	57.3074	39.5029	47.1079	34.7	26.4465	36.7315		P1MP				0	0	0	1	0	0	0	0	0
LOC_Os02g08380		25.3782	19.485	21.9242	24.3159	17.8442	20.345	36.8228	9.98348	25.331	P1MP	NoDiff	NoDiff			0	0	0	1	0	0	0	0	0
LOC_Os02g08410		11.079	16.2631	7.06118	8.08253	6.37059	7.67986	1.54424	11.0936	53.5875	P2POD	NoDiff	NoDiff			0	0	0	0	0	0	1	0	0
LOC_Os02g08510		0	0	0	0	0	0	0	0.11358	0.055746	P2MP	NoDiff	NoDiff			0	0	0	1	0	0	0	0	0
LOC_Os02g08530		42.2734	18.5294	27.8878	27.8305	13.2423	24.4686	20.902	11.932	14.9629	NoDiff		P1MP			0	0	0	1	0	0	0	0	0
LOC_Os02g08544	1	44.0022	43.4003	35.9576	44.6863	36.0225	42.2928	43.6815	48.4534	13.4235	P2NOD	NoDiff	NoDiff			1	0	0	0	0	0	0	0	0
LOC_Os02g09070		0.58106	0.925437	1.00921	0	0.641277	1.49023	0	0	1.69373	CPOD	P2PD	NoDiff			0	0	0	0	0	1	1	0	1
LOC_Os02g09090		0	0	0	0.311083	0	0	0	0	0	NoDiff	P1ND	NoDiff			0	1	0	0	0	0	0	0	0
LOC_Os02g09130		46.5477	30.7743	38.3868	35.277	24.5339	30.687	32.3106	26.255	29.3154	NoDiff	NoDiff	P1MP			0	0	0	1	0	0	0	0	0
LOC_Os02g09190		0.751556	0	0.125099	0.693509	0	0.246892	0.796639	0	0.361404	P1MP					0	0	0	1	0	0	0	0	0
LOC_Os02g09380		42.6426	11.4063	26.1836	33.3203	19.0136	25.8127	34.6332	13.6081	21.3664		NoDiff	P1MP			0	0	0	1	0	0	0	0	0
LOC_Os02g09440		0.475742	0.524638	0.182306	0.438997	0.454432	0.446527	0.144079	0.186444	0	NoDiff	NoDiff	P2NOD			1	0	0	0	0	0	0	0	0
LOC_Os02g09690		23.0312	14.6857	12.8995	20.3456	13.8625	19.9068	22.3746	18.4873	20.1224	NoDiff		P1ND			0	1	0	0	0	0	0	0	0
LOC_Os02g09710		0	0	0	0	0.742366	0.355205	0	0	0	NoDiff	P2MP	NoDiff			0	0	0	1	0	0	0	0	0
LOC_Os02g09720		3.40263	5.00623	4.57472	2.95547	5.35873	4.86187	3.27731	7.1749	5.06587	P2MP		NoDiff			0	0	0	1	0	0	0	0	0
LOC_Os02g09750		10.8336	10.6871	9.55237	7.13366	11.5345	11.8984	7.36826	10.1968	7.44894		P2PD	NoDiff	β-OsLCY; zebra524		0	0	0	0	0	1	0	0	0
LOC_Os02g09810		14.533	23.6284	29.7395	16.3515	11.4956	10.9805	8.40817	13.0565	13.5511	NoDiff	NoDiff	P2PD			0	0	0	0	0	1	0	0	0
LOC_Os02g10010		45.1817	26.861	32.7747	36.0337	30.0208	36.8586	5.81396	27.4681	33.4845	P2POD		P1MP			0	0	0	1	0	0	1	0	0
LOC_Os02g10100		2.30911	5.91433	4.80394	2.61054	6.87427	4.89534	3.78892	8.31532	5.61544	P2MP	P2MP				0	0	0	2	0	0	0	0	0
LOC_Os02g10110		0.116457	1.74609	1.08747	0.423351	2.81033	2.28318	0.282025	3.63953	1.69726	P2MP					0	0	0	1	0	0	0	0	0
LOC_Os02g10260		21.4262	15.1333	11.4872	12.9482	12.0069	13.2736	13.932	11.8259	14.3538	NoDiff	NoDiff	P1ND			0	1	0	0	0	0	0	0	0
LOC_Os02g10360		1.07176	1.76722	0.303731	0.320926	0.735084	1.31925	0.31036	1.81668	0.753976			P2ND			0	1	0	0	0	0	0	0	0
LOC_Os02g10430		0.603822	11.8949	11.9028	0.341559	0.603783	10.5036	0.217176	9.08672	0.628504		P2POD				0	0	0	0	0	0	1	0	0
LOC_Os02g10480		4.70149	8.9673	8.19903	4.0373	6.03693	7.20696	3.63895	8.24568	5.02517		P2PD		OsAGAP		0	0	0	0	0	1	0	0	0
LOC_Os02g10550		0.349005	0.173194	0	0.072461	0.135173	0.073704	0.039637	0	0	NoDiff	NoDiff	CNOD			1	0	0	0	0	0	0	1	0
LOC_Os02g10660		3.27914	3.04122	0.950774	1.6629	1.89599	1.49531	0.896425	1.02353	0.753542	NoDiff	NoDiff	P1NOD			1	0	0	0	0	0	0	0	0
LOC_Os02g10690		56.4989	47.4546	64.9819	57.8058	83.3065	69.4379	45.2916	66.4086	87.6608	P2PD	NoDiff	NoDiff			0	0	0	0	0	1	0	0	0
LOC_Os02g10700		87.4909	116.169	93.2888	73.5725	104.855	121.775	94.9909	107.642	123.714	P2PD	P2POD				0	0	0	0	0	1	1	0	0
LOC_Os02g10710		0	0	0	0	0	0	0	0	0.313207	CPOD	NoDiff	NoDiff			0	0	0	0	0	0	1	0	1
LOC_Os02g10720		109.845	64.1056	50.2078	79.222	57.6684	66.4416	49.6558	56.2379	70.1479	NoDiff	NoDiff	P1ND			0	1	0	0	0	0	0	0	0
LOC_Os02g10750		0	0	0	0	0	2.52981	0	0	0	NoDiff	CPOD	NoDiff			0	0	0	0	0	0	1	0	1
LOC_Os02g10760	1	1.71912	0.785684	3.83766	2.39991	1.89271	3.12063	2.45565	2.55945	1.25189	NoDiff	NoDiff	P1POD	OsWR1		0	0	0	0	0	0	1	0	0
LOC_Os02g10820		32.874	19.2914	18.7645	23.6927	18.7686	22.6642	24.0094	19.997	22.7096	NoDiff	NoDiff	P1ND			0	1	0	0	0	0	0	0	0
LOC_Os02g10880		0.136068	0.270096	0	0	0.282692	0.110151	0.041209	0.239964	0.078518	NoDiff		P2ND			0	1	0	0	0	0	0	0	0
LOC_Os02g10890		0	0	0.356799	0	0	0	0	0	0	NoDiff	NoDiff	CPOD			0	0	0	0	0	0	1	0	1
LOC_Os02g10900		13.1542	13.9352	17.1256	12.9685	12.2003	14.6657	11.9078	13.3759	14.2856	NoDiff	NoDiff	P2PD	RLS1		0	0	0	0	0	1	0	0	0
LOC_Os02g10920		1.51152	6.15318	14.1354	1.45836	53.9485	1.80477	5.8544	40.1923	234.44	P2POD	NoDiff	NoDiff	SRZ1		0	0	0	0	0	0	1	0	0
LOC_Os02g11000		9.25757	9.96844	13.4573	5.4829	4.69928	11.1904	7.00601	7.58973	8.60414	NoDiff	P1POD	P2PD			0	0	0	0	0	1	1	0	0
LOC_Os02g11020		34.6182	25.3087	18.7834	28.2375	19.9102	36.2698	30.0393	32.9991	31.2667	NoDiff	P1POD	P1NOD	CYP734A2		1	0	0	0	0	0	1	0	0
LOC_Os02g11030		12.0986	11.5055	66.4149	29.2372	53.8378	41.0983	12.4499	45.9498	46.1674	NoDiff	NoDiff	P1POD			0	0	0	0	0	0	1	0	0
LOC_Os02g11650		0.209795	0	0.120591	0.329108	0	0	0.105896	0	0.060531	NoDiff	P1ND				0	1	0	0	0	0	0	0	0
LOC_Os02g11840		42.5913	9.05153	40.5939	32.7256	6.41889	9.05029	21.1167	17.7802	46.515	P1PD	NoDiff				0	0	0	0	0	1	0	0	0
LOC_Os02g11870		0	0	0	0	0.10765	0	0	0.110417	0	P2ND	P2ND	NoDiff			0	2	0	0	0	0	0	0	0
LOC_Os02g12010		0.14553	0.536487	0.824563	0.241722	0.482568	0.804929	0.408608	0.366642	0.485872	NoDiff	P2POD	P2PD			0	0	0	0	0	1	1	0	0
LOC_Os02g12130		24.5231	23.8689	0	25.2496	18.2741	32.0617	0	16.3824	19.8371		NoDiff	CNOD			1	0	0	0	0	0	0	1	0
LOC_Os02g12340		0	0	0	0	0	0.5074	0	0	0	NoDiff	CPOD	NoDiff			0	0	0	0	0	0	1	0	1
LOC_Os02g12390		0.326147	0	0	0.159455	0.077662	0	0.094299	0.092474	0.122051	NoDiff	CNOD	P1ND			1	1	0	0	0	0	0	1	0
LOC_Os02g12460		0	1.4919	0	0	0.51881	0.214752	0	1.41904	0	P2ND	NoDiff	P2ND			0	2	0	0	0	0	0	0	0
LOC_Os02g12580		72.3272	60.1253	24.9463	76.8294	36.2271	63.7016	67.9491	60.5794	64.5318	NoDiff		P1NOD	OsPP2A-3		1	0	0	0	0	0	0	0	0
LOC_Os02g12600		3.10647	3.09463	2.34795	1.81736	4.00879	4.61086	1.9237	3.29593	5.08995	P2POD		NoDiff			0	0	0	0	0	0	1	0	0
LOC_Os02g12640		0	0	0	0	0	0	0.282523	0	0.14355	P1MP	NoDiff	NoDiff			0	0	0	1	0	0	0	0	0
LOC_Os02g12680		0.037872	0.075175	0	0	0	0	0.034409	0.066789	0.196683	P2POD	NoDiff	NoDiff	OsAOS3; OsHPL2		0	0	0	0	0	0	1	0	0
LOC_Os02g12790	1	18.4242	16.0129	16.6387	13.4095	11.5193	19.582	15.3993	16.1117	15.7469	NoDiff	P1PD	NoDiff	Cga1		0	0	0	0	0	1	0	0	0
LOC_Os02g12800		312.743	240.05	152.917	144.867	221.895	224.592	280.257	131.312	233.738		NoDiff	P1ND			0	1	0	0	0	0	0	0	0
LOC_Os02g12820	1	0	0	0	0	0	0	0	0.099906	0.17121	P2POD	NoDiff	NoDiff			0	0	0	0	0	0	1	0	0
LOC_Os02g13020		0.034358	1.5004	0.651716	0	2.21527	0.696554	0	2.36307	0.921914	P2MP	P2MP				0	0	0	2	0	0	0	0	0
LOC_Os02g13060		2.54677	9.07901	3.49543	1.59709	5.09378	2.23915	1.46389	3.57476	2.38437	NoDiff		P2ND			0	1	0	0	0	0	0	0	0
LOC_Os02g13190		0	0	0.066583	0.032067	0	0	0	0	0	NoDiff	NoDiff	CPOD			0	0	0	0	0	0	1	0	1
LOC_Os02g13220		0	0	0	0	0	0.101394	0.036352	0	0.103896	P1POD	CPOD	NoDiff			0	0	0	0	0	0	2	0	1
LOC_Os02g13230		0	0	0.275469	0	0	0	0	0	0	NoDiff	NoDiff	CPOD			0	0	0	0	0	0	1	0	1
LOC_Os02g13240		0	0	0	0	0	0	0	0	0.132664	CPOD	NoDiff	NoDiff			0	0	0	0	0	0	1	0	1
LOC_Os02g13304		0.943537	0.900446	1.42367	1.55966	2.36325	1.58513	1.3848	5.28793	1.94752	P2ND	NoDiff	NoDiff			0	1	0	0	0	0	0	0	0
LOC_Os02g13490		2.85927	1.60083	2.2335	4.1606	0.714314	1.96115	1.27424	0.64647	0.571132	NoDiff	P1MP	NoDiff			0	0	0	1	0	0	0	0	0
LOC_Os02g13500		0	0	0	0.21255	0.228277	0.093984	0.122336	0	0.574725	P1POD	NoDiff	NoDiff			0	0	0	0	0	0	1	0	0
LOC_Os02g13530		75.9581	47.6321	44.9917	89.6665	51.6029	128.379	486.661	140.67	470.752	P1PD	NoDiff	NoDiff			0	0	0	0	0	1	0	0	0
LOC_Os02g13570		3.90788	2.00663	2.91418	3.10799	1.95035	5.70992	4.15865	1.65447	2.3633	NoDiff	P1PD	NoDiff			0	0	0	0	0	1	0	0	0
LOC_Os02g13620		0.146922	0	0.118505	0.283395	0	0	0.572704	0.639405	0.063586	P2NOD	NoDiff	NoDiff			1	0	0	0	0	0	0	0	0
LOC_Os02g13650		15.5076	10.2068	6.37469	5.16936	6.84319	7.04879	5.25916	4.26228	5.34871	NoDiff	NoDiff	P1ND			0	1	0	0	0	0	0	0	0
LOC_Os02g13730		0	0	0.193025	0	0.153039	0	0	0	0.189074	CPOD		CPOD			0	0	0	0	0	0	2	0	2
LOC_Os02g13890		14.9709	14.0527	8.88212	13.8165	14.8778	11.2929	15.7207	13.7196	16.2035	NoDiff	NoDiff	P1NOD			1	0	0	0	0	0	0	0	0
LOC_Os02g13990		98.2423	42.0033	42.3349	103.153	69.3242	146.583	93.9361	91.2556	74.3801	NoDiff	P1POD	P1ND			0	1	0	0	0	0	1	0	0
LOC_Os02g14110		38.2111	15.9462	39.8398	87.6935	27.4228	18.4574	12.3144	34.9542	22.1471	NoDiff	P1ND				0	1	0	0	0	0	0	0	0
LOC_Os02g14120		110.014	71.5978	67.7561	81.1018	72.3039	70.7066	122.911	81.0045	104.072	P1MP	NoDiff	P1ND	Docs1		0	1	0	1	0	0	0	0	0
LOC_Os02g14160		0.081167	0	0	0.16852	0.209334	0.068564	0	0.500993	0	P2ND	P2NOD				1	1	0	0	0	0	0	0	0
LOC_Os02g14190		19.0202	9.53735	11.7208	13.6212	7.36551	10.6381	8.07423	5.00361	5.98039	NoDiff	P1MP	P1ND			0	1	0	1	0	0	0	0	0
LOC_Os02g14250	1	8.72484	0	1.97349	6.08514	0	0.812058	4.01655	0	0.086261	P1ND	P1ND	P1NPD			0	2	1	0	0	0	0	0	0
LOC_Os02g14260		0	0	0.072886	0.035102	0.054506	0	0.057604	0	0			CPOD			0	0	0	0	0	0	1	0	1
LOC_Os02g14290		33.2597	22.0124	44.7195	22.0103	22.0937	24.5327	19.1042	18.0274	17.9192	NoDiff	NoDiff	P1POD			0	0	0	0	0	0	1	0	0
LOC_Os02g14300		1.11529	0	0	0.922502	0.336454	0	0	0	2.08378	CPOD	NoDiff				0	0	0	0	0	0	1	0	1
LOC_Os02g14855		0	0	0	0	0.071652	0	0	0	0.072142	CPOD		NoDiff			0	0	0	0	0	0	1	0	1
LOC_Os02g14970		0.256509	0	0	0.230919	0.448169	0.383516	0	0.328158	0.867217	P2POD	NoDiff	NoDiff			0	0	0	0	0	0	1	0	0
LOC_Os02g15050		0	0	0	0	0.230672	0	0	0.717492	0	P2ND	NoDiff	NoDiff			0	1	0	0	0	0	0	0	0
LOC_Os02g15150		0	0	0.118557	0	0	0	0	0	0	NoDiff	NoDiff	CPOD			0	0	0	0	0	0	1	0	1
LOC_Os02g15240		1.10935	0.536193	0.099815	0.784696	0.578018	0.963481	0.942324	0.425574	0.842355	NoDiff	NoDiff	P1ND			0	1	0	0	0	0	0	0	0
LOC_Os02g15390	1	0	0	0	0	0	0	0	0	0.061254	CPOD	NoDiff	NoDiff			0	0	0	0	0	0	1	0	1
LOC_Os02g15400		0	0	0.066859	0	0	0	0	0	0	NoDiff	NoDiff	CPOD			0	0	0	0	0	0	1	0	1
LOC_Os02g15670		1.85257	11.234	5.71154	0.699334	10.7502	4.75108	0.81608	14.1344	8.0207	P2MP	P2MP	P2MP			0	0	0	3	0	0	0	0	0
LOC_Os02g15690		14.5815	15.7301	12.7739	10.8369	16.3425	21.8027	11.9641	16.303	20.6697	P2PD	P2POD	NoDiff			0	0	0	0	0	1	1	0	0
LOC_Os02g15930		8.84306	10.4833	7.13037	4.93929	16.9176	34.0763	5.05872	12.7072	9.03016	NoDiff	P2POD	NoDiff			0	0	0	0	0	0	1	0	0
LOC_Os02g15960		0	0	0	0.759825	0	2.50376	0	1.47743	0	P2ND	P1POD	NoDiff			0	1	0	0	0	0	1	0	0
LOC_Os02g16020		0	0.48592	0.738724	0.2033	0.263059	0.155089	0	0	0.688637	CPOD	NoDiff	P2PD			0	0	0	0	0	1	1	0	1
LOC_Os02g16030		1.67132	1.61846	0.262753	1.05802	1.86878	1.33374	1.66473	1.79476	1.54232	NoDiff	NoDiff	P1NOD			1	0	0	0	0	0	0	0	0
LOC_Os02g16280		8.64683	2.71195	4.33737	7.3783	1.76781	9.81554	5.79415	0	3.29376	NoDiff	P1PD				0	0	0	0	0	1	0	0	0
LOC_Os02g16340		0	0	0.24976	0.120286	0	0.244696	0	0	0	NoDiff	P1PD	CPOD			0	0	0	0	0	1	1	0	1
LOC_Os02g16370		0.306793	0.751836	1.40587	1.22204	0.90195	1.66054	0.949781	1.20233	1.10893	NoDiff	NoDiff	P2PD			0	0	0	0	0	1	0	0	0
LOC_Os02g16470		2.96288	2.61491	1.55266	1.29707	1.839	1.53809	1.74385	1.16271	1.04499	NoDiff	NoDiff	P1ND			0	1	0	0	0	0	0	0	0
LOC_Os02g16600		69.4753	96.0747	106.096	55.5038	55.2705	60.225	59.4231	65.3374	63.0738	NoDiff	NoDiff	P2PD			0	0	0	0	0	1	0	0	0
LOC_Os02g16610		0.033609	0	0	0	0	0.090853	0.097718	0	0	P1ND	CPOD	NoDiff			0	1	0	0	0	0	1	0	1
LOC_Os02g16680	1	36.922	40.3988	5.35528	9.82345	6.70046	4.50082	5.30714	27.4727	22.0991	NoDiff	NoDiff	P2NOD	RITA-1; OsbZIP20; RISBZ3		1	0	0	0	0	0	0	0	0
LOC_Os02g16839		0.071466	0	0	0.059352	0.061439	0	0	0	0.123717	CPOD	CNOD				1	0	0	0	0	0	1	1	1
LOC_Os02g16940		0	0.484553	0	0.067576	0.326442	0	0	0	0	NoDiff	P2ND	P2ND			0	2	0	0	0	0	0	0	0
LOC_Os02g16960		0.273554	0.489319	0.311727	0.21837	0.326415	0.458113	0.270315	0.376764	0.741166	P2PD	NoDiff	NoDiff			0	0	0	0	0	1	0	0	0
LOC_Os02g16970		0.28352	0.904095	0.753796	0.643036	0.6247	1.61585	0.827629	0.855033	1.28586	NoDiff	P1POD	NoDiff			0	0	0	0	0	0	1	0	0
LOC_Os02g17040		0	0	0	0	0	0.252347	0	0	0.113807	CPOD	CPOD	NoDiff			0	0	0	0	0	0	2	0	2
LOC_Os02g17070		3.30907	1.65073	2.15103	6.07722	1.34047	1.91901	1.49537	0.183321	0.603592	NoDiff	P1ND	NoDiff			0	1	0	0	0	0	0	0	0
LOC_Os02g17100		4.52553	2.27371	2.76614	6.04813	1.20083	2.90365	2.26103	0.76743	1.10129	NoDiff	P1MP				0	0	0	1	0	0	0	0	0
LOC_Os02g17270		0.3591	0	0	0.149114	0	0	0	0	0.155413	CPOD		P1ND			0	1	0	0	0	0	1	0	1
LOC_Os02g17280		23.9804	10.5613	10.3715	9.89393	8.49958	15.9628	16.9356	11.2332	13.8141	NoDiff	P1PD	P1ND			0	1	0	0	0	1	0	0	0
LOC_Os02g17292		26.8516	1.01866	9.32099	21.3674	0.725211	15.4441	20.4344	0.805988	13.4789			P1MP			0	0	0	1	0	0	0	0	0
LOC_Os02g17350		10.1041	15.8741	13.1275	5.36327	11.0212	13.4671	6.1966	8.13152	6.79407	NoDiff	P2PD	NoDiff			0	0	0	0	0	1	0	0	0
LOC_Os02g17700		7.72277	4.13183	8.60518	4.92885	5.27236	7.41529	3.42618	3.14829	6.25008	P1POD		P1PD			0	0	0	0	0	1	1	0	0
LOC_Os02g17920		0.60279	0	0	0.967491	0	0.700145	0.650358	0.332203	0	P1ND					0	1	0	0	0	0	0	0	0
LOC_Os02g17960		0.889726	0.28977	0.717409	0.956686	0.193489	1.29209	0.822113	0.193613	0.660115		P1POD				0	0	0	0	0	0	1	0	0
LOC_Os02g18070		0.109831	0	0	0	0	0.184014	0	0.2305	0.207423	P2PD	CPOD	P1ND			0	1	0	0	0	1	1	0	1
LOC_Os02g18080		0.313448	0.157124	0.218395	0.460164	0.176928	0.347699	0.575339	0.223352	0.630338	P1PD	NoDiff	NoDiff			0	0	0	0	0	1	0	0	0
LOC_Os02g18140		0	0	0	0.539486	0	0.345502	0.480905	0	0.166601	P1MP	P1MP	NoDiff			0	0	0	2	0	0	0	0	0
LOC_Os02g18150		0	0	0	0.021932	0	0.022308	0	0.093146	0	P2ND	NoDiff	NoDiff			0	1	0	0	0	0	0	0	0
LOC_Os02g18220		0	0.40644	0	0	0	0.218479	0	0.45612	0	P2ND	CPOD	P2ND			0	2	0	0	0	0	1	0	1
LOC_Os02g18240		0	3.08038	4.74729	0.486449	2.39107	4.60158	0.459637	2.64832	1.75145	NoDiff	P2PD	P2PD			0	0	0	0	0	2	0	0	0
LOC_Os02g18250		0	0.40644	0	0	0	0.218479	0	0.45612	0	P2ND	CPOD	P2ND			0	2	0	0	0	0	1	0	1
LOC_Os02g18380		1560.44	769.236	643.746	1255.08	932.708	1193.15	1153.97	811.49	1127.43			P1ND			0	1	0	0	0	0	0	0	0
LOC_Os02g18430		0	0	0.225687	0	0	0	0	0	0	NoDiff	NoDiff	CPOD			0	0	0	0	0	0	1	0	1
LOC_Os02g18620		0	0	0.144648	0.069663	0	0	0	0	0	NoDiff	NoDiff	CPOD			0	0	0	0	0	0	1	0	1
LOC_Os02g18650		0.711605	0	0	0	0.111229	0.163941	0	0.228173	0		NoDiff	P1ND			0	1	0	0	0	0	0	0	0
LOC_Os02g18670		0	0.104336	0	0	0.240996	0	0	0.278086	0	P2ND	P2ND				0	2	0	0	0	0	0	0	0
LOC_Os02g18700		0	0.179838	0	0	0.155774	0	0	0.287595	0	P2ND	P2ND	P2ND			0	3	0	0	0	0	0	0	0
LOC_Os02g18784		13.9871	0.141087	3.7995	11.6162	0.061104	6.24918	12.2628	0.626731	7.52485		P1MP				0	0	0	1	0	0	0	0	0
LOC_Os02g18810		7.04445	27.1005	30.7319	26.4905	23.6559	6.58577	21.9801	23.618	4.61159	P2NOD	P1NOD	P2PD			2	0	0	0	0	1	0	0	0
LOC_Os02g18840		171.026	48.1372	124.014	140.326	47.5374	104.075	115.668	44.2832	86.1219		P1MP	P1MP			0	0	0	2	0	0	0	0	0
LOC_Os02g18890		0	0.674353	0	0	0	0.90668	0	0	1.73166	CPOD	NoDiff	NoDiff			0	0	0	0	0	0	1	0	1
LOC_Os02g18900		0	0	0	0.046382	0	0.035383	0.050743	0	0	P1ND		NoDiff			0	1	0	0	0	0	0	0	0
LOC_Os02g18980		12.8772	0	4.60026	26.5613	1.13458	10.3203	28.814	0	12.5901	P1MP	P1MP				0	0	0	2	0	0	0	0	0
LOC_Os02g19060		0.544955	0	0	0.181031	0	0	0.148537	0	0			P1ND			0	1	0	0	0	0	0	0	0
LOC_Os02g19170		13.0809	11.6519	12.391	13.1959	12.3049	13.8693	0.577173	12.2706	13.9067	P2PD	NoDiff	NoDiff			0	0	0	0	0	1	0	0	0
LOC_Os02g19330		12.1918	10.2065	72.4906	63.3015	9.24261	10.6771	7.51904	7.22877	7.89606	NoDiff		P1POD			0	0	0	0	0	0	1	0	0
LOC_Os02g19510		73.2831	61.8593	50.2526	67.3076	52.2978	60.8702	69.1663	52.5497	65.9356	NoDiff	NoDiff	P1ND			0	1	0	0	0	0	0	0	0
LOC_Os02g19620		0	0.905435	0.501067	0	0.8299	0.623976	0	0.662435	0.383869			P2MP			0	0	0	1	0	0	0	0	0
LOC_Os02g19790		0.580447	0.290406	0.378422	0.165519	0.11827	0.487224	0.586421	0.774022	0	CNOD	NoDiff	NoDiff			1	0	0	0	0	0	0	1	0
LOC_Os02g19890		13.8072	13.2252	16.6558	6.89583	12.1112	15.5262	13.8832	13.9516	13.017	NoDiff	P2PD	NoDiff			0	0	0	0	0	1	0	0	0
LOC_Os02g19990		17.6317	1.38114	9.91992	1.28692	1.24046	16.1641	11.9112	8.4556	12.1804	NoDiff	P1POD	NoDiff			0	0	0	0	0	0	1	0	0
LOC_Os02g20250		4.71131	4.83937	3.33376	3.81018	4.12977	6.25645	3.56785	4.84038	4.37988	NoDiff	P2POD	NoDiff			0	0	0	0	0	0	1	0	0
LOC_Os02g20270		3.42341	3.89759	7.24942	3.51498	2.36555	2.99983	2.74055	1.51041	2.49268	NoDiff	NoDiff	P2POD			0	0	0	0	0	0	1	0	0
LOC_Os02g20330		38.2374	0	0	0	0	5.59441	18.1465	0	4.93527	P1MP	CPOD	P1ND			0	1	0	1	0	0	1	0	1
LOC_Os02g20410		119.914	104.657	145.46	111.496	94.1136	96.459	88.2813	83.3736	97.3129	NoDiff	NoDiff	P1PD			0	0	0	0	0	1	0	0	0
LOC_Os02g20450		0	1.24917	0	0	0	0	0	0	0	NoDiff	NoDiff	P2ND			0	1	0	0	0	0	0	0	0
LOC_Os02g20560		0	0	0	0	0	0	0	0.230424	0	P2ND	NoDiff	NoDiff			0	1	0	0	0	0	0	0	0
LOC_Os02g20740		0	0.319448	0	0	0	0.313714	0	0	0	NoDiff	CPOD	P2ND			0	1	0	0	0	0	1	0	1
LOC_Os02g20860		50.5812	34.1057	42.9429	33.3214	33.1991	39.2872	33.8295	27.0076	2.35393	P1NOD	NoDiff	NoDiff			1	0	0	0	0	0	0	0	0
LOC_Os02g20870		0.919832	10.6546	9.99622	0.544457	4.88738	7.86629	7.00113	6.52296	9.66973	NoDiff	P2PD	P2PD			0	0	0	0	0	2	0	0	0
LOC_Os02g20950		21.9108	16.3796	21.5475	16.6387	15.8528	20.9102	16.8248	16.5878	20.6811	NoDiff	P1PD				0	0	0	0	0	1	0	0	0
LOC_Os02g21060		0	0	0	0.074763	0	0.177439	0	0.10584	0.415581	P2POD	P1POD	NoDiff			0	0	0	0	0	0	2	0	0
LOC_Os02g21070		1.71959	1.18713	0	0.935973	1.41067	1.28718	0.825897	1.28248	1.02287	NoDiff	NoDiff	CNOD			1	0	0	0	0	0	0	1	0
LOC_Os02g21090		24.483	16.7867	19.4023	6.23063	20.4187	24.935	5.61586	23.719	28.9343	P2PD	P2PD	NoDiff			0	0	0	0	0	2	0	0	0
LOC_Os02g21100		0	0	0	0.035128	0	0	0	0	0	NoDiff	P1ND	NoDiff			0	1	0	0	0	0	0	0	0
LOC_Os02g21250		62.3851	53.6343	1.08039	49.3155	51.5605	15.9997	40.5453	14.025	11.2896	NoDiff	P2NOD	P1NOD			2	0	0	0	0	0	0	0	0
LOC_Os02g21269		37.7622	30.4385	12.2139	25.8879	26.7951	29.3874	30.9906	28.734	32.4952	NoDiff	NoDiff	P1NOD			1	0	0	0	0	0	0	0	0
LOC_Os02g21330		0.378568	0.125244	0.217602	0.209597	0.433933	0.852768	0.401275	0.445081	0.54613	NoDiff	P2POD	NoDiff			0	0	0	0	0	0	1	0	0
LOC_Os02g21350		0	0.365468	0.042994	0.27077	0.395703	0	0.08364	0.324695	0.079683	P2ND	CNOD	P2ND			1	2	0	0	0	0	0	1	0
LOC_Os02g21470		0	0	0	0	0	0.394201	0	0	0.269285	CPOD	CPOD	NoDiff			0	0	0	0	0	0	2	0	2
LOC_Os02g21640		0.568165	0	0	0	1.44072	0.80957	2.08387	4.00795	0.491789	P2ND	NoDiff	NoDiff			0	1	0	0	0	0	0	0	0
LOC_Os02g21720		0	0.304085	0	0	0	0	0	0.15898	0.11458	NoDiff	NoDiff	P2ND			0	1	0	0	0	0	0	0	0
LOC_Os02g21730		0	0	0	0	0.184714	0.114324	0.244536	0.191331	0.046954	P1NOD	NoDiff	NoDiff			1	0	0	0	0	0	0	0	0
LOC_Os02g21810		0.74994	0	0.234894	1.13092	0	0.633498	3.3426	0	1.0032	P1NPD	P1MP	P1MP			0	0	1	2	0	0	0	0	0
LOC_Os02g21920		10.8533	11.1283	9.63819	9.85861	5.32737	5.8276	15.6645	16.1777	5.86745	P2NOD	NoDiff	NoDiff			1	0	0	0	0	0	0	0	0
LOC_Os02g21950		0.56577	0.449223	2.92686	2.72522	0.583662	1.81611	2.05614	1.39687	1.46915	NoDiff		P1POD			0	0	0	0	0	0	1	0	0
LOC_Os02g22060		8.35881	5.03979	5.17456	6.97892	6.18074	8.7674	5.72311	6.78735	7.6897	NoDiff	P1PD				0	0	0	0	0	1	0	0	0
LOC_Os02g22230		0	0	0	0	0.26159	0.356355	0	0	0	NoDiff	P2PD	NoDiff			0	0	0	0	0	1	0	0	0
LOC_Os02g22260		3.22864	9.90258	4.41811	10.2196	19.7699	5.03422	4.4855	7.98546	6.06375	NoDiff	P2ND				0	1	0	0	0	0	0	0	0
LOC_Os02g22290		6.56333	0	0	3.82857	6.67824	0.168886	7.18736	0	6.5264		P2ND				0	1	0	0	0	0	0	0	0
LOC_Os02g22390		0	0	0	0	0	0.208301	0.113942	0	0.218664	P1PD	CPOD	NoDiff			0	0	0	0	0	1	1	0	1
LOC_Os02g22430		0	0.197821	0.343705	0.089663	0.17135	0.596309	0.298046	0.483321	0.643369	NoDiff	P2PD	NoDiff			0	0	0	0	0	1	0	0	0
LOC_Os02g22480		44.1553	40.8397	24.4598	40.3443	33.5648	39.6032	34.0724	31.7519	36.1454	NoDiff	NoDiff	P1NOD			1	0	0	0	0	0	0	0	0
LOC_Os02g22790		0	0	0	0	0	0.03289	0	0	0.083643	CPOD	NoDiff	NoDiff			0	0	0	0	0	0	1	0	1
LOC_Os02g23821		7.32779	0.251819	4.87307	8.03711	0.203392	3.81842	8.1984	0.192397	5.96507	P1PPD	P1MP	P1MP			0	0	0	2	1	0	0	0	0
LOC_Os02g23828		0.280063	2.66239	4.94477	0.723209	3.10982	4.64597	1.18962	2.84876	2.90218	NoDiff	P2PD	P2PD			0	0	0	0	0	2	0	0	0
LOC_Os02g23890		81.3427	62.6762	33.8413	58.6347	55.5121	55.9131	75.0662	32.9455	27.9856		NoDiff	P1ND			0	1	0	0	0	0	0	0	0
LOC_Os02g23939		0.39113	0.45878	0.459866	0.324829	0.305683	0.555674	0.306907	0.438951	0.415497	NoDiff	P1POD	NoDiff			0	0	0	0	0	0	1	0	0
LOC_Os02g23960		0	0	2.14686	0	0.485493	0.254892	0	0	0.905429	CPOD	NoDiff	CPOD			0	0	0	0	0	0	2	0	2
LOC_Os02g23970		0	0	0	0	0.977466	0	0	1.16979	0	P2ND	P2ND	NoDiff			0	2	0	0	0	0	0	0	0
LOC_Os02g24020		51.4759	37.4319	42.411	42.4128	33.5668	49.4751	31.708	30.1235	30.3289	NoDiff	P1PD				0	0	0	0	0	1	0	0	0
LOC_Os02g24205		1.00134	4.03781	4.41729	0.483289	3.67512	3.76607	1.07256	6.82736	4.64007	P2MP					0	0	0	1	0	0	0	0	0
LOC_Os02g24270		12.6409	21.5273	24.0202	11.3071	19.1875	13.8685	13.9251	18.5309	16.6703	NoDiff		P2PD			0	0	0	0	0	1	0	0	0
LOC_Os02g24320		0.139804	0.166507	0.495827	2.0893	0	0.388002	0.25404	0	0.145213	NoDiff	P1NPD	P2POD			0	0	1	0	0	0	1	0	0
LOC_Os02g24330		25.1764	21.0338	24.1343	22.8207	24.409	31.3784	28.5405	27.0503	2.42849	P1NOD	NoDiff	NoDiff			1	0	0	0	0	0	0	0	0
LOC_Os02g24460		0.724184	0	0	0	0	1.31797	1.31593	0.766283	0		CPOD	NoDiff			0	0	0	0	0	0	1	0	1
LOC_Os02g24490		0.356156	0	0	0.422548	0	0.343837	0.55358	0.179456	0	P1ND					0	1	0	0	0	0	0	0	0
LOC_Os02g24520		0.425992	0.352331	1.46917	1.00238	0.36622	1.70928	1.12886	0.626048	0.921817	NoDiff	P1POD	P1POD			0	0	0	0	0	0	2	0	0
LOC_Os02g24530		0	0	0	0	0.052464	0	0	0.107624	0.264116	P2PD	NoDiff	NoDiff			0	0	0	0	0	1	0	0	0
LOC_Os02g24614		0.795225	9.50666	6.14456	3.44687	6.37499	2.88909	3.32354	5.37945	3.4944	NoDiff		P2MP			0	0	0	1	0	0	0	0	0
LOC_Os02g24634		2.12116	2.01153	12.753	7.43035	1.64657	1.25567	0.90624	3.02655	0.637144	NoDiff	NoDiff	P1POD			0	0	0	0	0	0	1	0	0
LOC_Os02g24710		0	0.264611	0.229873	0	0.095945	0.054994	0	0	0.305904	CPOD	NoDiff				0	0	0	0	0	0	1	0	1
LOC_Os02g24750		52.9244	44.8597	56.7516	46.2817	31.3043	60.0914	43.4509	39.98	39.3235	NoDiff	P1PD	NoDiff			0	0	0	0	0	1	0	0	0
LOC_Os02g24770		0.093443	0.649198	0.944234	0.597349	0.379425	0.845644	0.573066	0.82396	1.3079	P2PD	NoDiff				0	0	0	0	0	1	0	0	0
LOC_Os02g24780		0	0	0.103492	0	0.068793	0.118293	0.054528	0.246961	0	P2ND	NoDiff	NoDiff			0	1	0	0	0	0	0	0	0
LOC_Os02g24870		0	37.5184	17.1382	0	61.7627	21.7436	0	47.2171	29.5404	P2MP	P2MP	P2MP			0	0	0	3	0	0	0	0	0
LOC_Os02g24970		0.463066	0	0.266174	0.865286	0.497616	1.66246	0.245422	0	0.768235		P1POD	NoDiff			0	0	0	0	0	0	1	0	0
LOC_Os02g25040		0	0.134556	0.263006	0.084444	0	0.21473	0.092382	0.059772	0.144645	NoDiff		P2PD			0	0	0	0	0	1	0	0	0
LOC_Os02g25370		0	0	0	0.184487	0.10332	0.187651	0	0	0.285007	CPOD	NoDiff	NoDiff			0	0	0	0	0	0	1	0	1
LOC_Os02g25380		2.99924	0.783266	1.45071	2.48276	0.376645	1.59843	0.702453	0.636297	0.24538	NoDiff	P1MP	P1MP			0	0	0	2	0	0	0	0	0
LOC_Os02g25390		0.225837	1.79315	3.43835	0.755737	1.95115	3.51023	0.615559	2.21826	1.71323	NoDiff	P2PD	P2POD			0	0	0	0	0	1	1	0	0
LOC_Os02g25470		0	0	0	0	0.203751	0.448981	0	0	0	NoDiff	P2PD	NoDiff			0	0	0	0	0	1	0	0	0
LOC_Os02g25480		0.29031	0	1.96213	0.19631	0.116929	1.37935	0.174107	1.33743	0.768504	NoDiff	P1POD	P1POD			0	0	0	0	0	0	2	0	0
LOC_Os02g25500		0.167031	0.505375	0.753794	0.885619	0.613922	0.492118	0.605884	0.299329	0.293829	NoDiff		P2PD			0	0	0	0	0	1	0	0	0
LOC_Os02g25530		0	0	0	0	3.17405	4.03118	0.539669	1.59193	2.61531	NoDiff	P2PD	NoDiff			0	0	0	0	0	1	0	0	0
LOC_Os02g25624		22.9821	20.21	27.3693	18.054	14.8147	28.4833	18.9443	15.9248	18.5586	NoDiff	P1POD	P1PD			0	0	0	0	0	1	1	0	0
LOC_Os02g25680		0	0	0	0	0.204494	0.401874	0.53563	0.209748	1.07727	P1POD	NoDiff	NoDiff			0	0	0	0	0	0	1	0	0
LOC_Os02g25780		7.77653	5.21295	1.95553	4.21329	5.38765	3.78137	1.46415	1.68414	0.929921	NoDiff	NoDiff	P1NOD			1	0	0	0	0	0	0	0	0
LOC_Os02g25870		11.0991	10.7301	11.783	7.87479	7.62197	17.0871	11.3195	11.1305	13.7876	NoDiff	P1POD	NoDiff			0	0	0	0	0	0	1	0	0
LOC_Os02g25900		2.05164	2.78713	70.3094	2.39534	2.51803	61.6647	2.80696	69.1614	3.27998		P2POD	P2POD			0	0	0	0	0	0	2	0	0
LOC_Os02g26180		0	0	0.155917	0	0	0.109565	0.152959	0	0		CPOD	CPOD			0	0	0	0	0	0	2	0	2
LOC_Os02g26190		0	0.041287	0	0.023726	0.046812	0.185996	0.01922	0	0.057701	NoDiff	P2POD	NoDiff			0	0	0	0	0	0	1	0	0
LOC_Os02g26294		24.64	18.4453	8.57406	5.4419	11.9382	19.7404	16.4879	12.1452	13.7212	NoDiff	P2PD	P1NOD			1	0	0	0	0	1	0	0	0
LOC_Os02g26300		63.5658	46.8485	58.1007	56.0777	41.2184	52.4964	40.2072	34.9149	46.1695	P1PD					0	0	0	0	0	1	0	0	0
LOC_Os02g26420		0	0	0.152047	0.115289	0.079022	0.136341	0	0	0	NoDiff	NoDiff	CPOD			0	0	0	0	0	0	1	0	1
LOC_Os02g26580		0.182568	0.724796	1.33143	0.45486	1.09212	0.462662	0.165874	1.03969	0.158026			P2POD			0	0	0	0	0	0	1	0	0
LOC_Os02g26600		8.14727	6.06116	4.18266	4.63277	3.72648	5.72106	5.15454	4.56729	4.11333	NoDiff		P1NOD			1	0	0	0	0	0	0	0	0
LOC_Os02g26670		0	0.09169	0	0	0.079421	0	0	0.081461	0	P2ND	P2ND	P2ND			0	3	0	0	0	0	0	0	0
LOC_Os02g26710		0.165843	0	0.571967	0.688657	0.623761	0.280187	0.150678	0.292473	0.43065	NoDiff	NoDiff	P1PD			0	0	0	0	0	1	0	0	0
LOC_Os02g26750		0	0	0.377399	0	0	0.370752	0	0.580517	0.410806		CPOD	CPOD			0	0	0	0	0	0	2	0	2
LOC_Os02g26770		1.83884	0.473163	1.35058	2.26242	1.69793	0.92049	0.49502	1.56139	2.74176	P2PD	NoDiff	NoDiff			0	0	0	0	0	1	0	0	0
LOC_Os02g26840		0.250438	0.124282	0	0.051997	0.053825	0.158666	0.170654	0.331247	0	CNOD	NoDiff	P1ND			1	1	0	0	0	0	0	1	0
LOC_Os02g27010		0	0	0	0	0.180021	0.309557	0	0.243778	0.156691		P2PD	NoDiff			0	0	0	0	0	1	0	0	0
LOC_Os02g27050		0	0	0	0	0	0	0.135175	0	0	P1ND	NoDiff	NoDiff			0	1	0	0	0	0	0	0	0
LOC_Os02g27240		0	0	0	0	0.045278	0.022245	0	0.139325	0	P2ND	NoDiff	NoDiff			0	1	0	0	0	0	0	0	0
LOC_Os02g27340		0	0	0	0	0.165285	0.487229	0.524043	0	0	P1ND	P2POD	NoDiff			0	1	0	0	0	0	1	0	0
LOC_Os02g27380		4.42644	0.122864	2.99831	4.8174	0.106423	2.50982	4.89581	0	3.84066	P1PD	P1MP	P1MP			0	0	0	2	0	1	0	0	0
LOC_Os02g27440		6.11112	3.48029	7.60676	4.04196	4.22319	3.98814	3.10081	2.58627	3.39012	NoDiff	NoDiff	P1PD			0	0	0	0	0	1	0	0	0
LOC_Os02g27640		0	0	0	0	0.104487	0.179672	0	0	0.099717	CPOD	P2PD	NoDiff			0	0	0	0	0	1	1	0	1
LOC_Os02g27674		23.0583	16.7997	29.7691	15.1759	17.1002	19.475	11.5715	12.0715	14.7017	NoDiff	NoDiff	P1PD			0	0	0	0	0	1	0	0	0
LOC_Os02g27850		6.568	8.44087	9.84305	5.96922	8.31147	11.8303	5.04325	9.38794	8.86045		P2POD	NoDiff			0	0	0	0	0	0	1	0	0
LOC_Os02g27920		2.81666	0	0	3.24966	0	5.03811	3.56966	0	2.85328	NoDiff	P1PD	NoDiff			0	0	0	0	0	1	0	0	0
LOC_Os02g27960		8.49834	31.8994	7.38109	33.4866	35.2217	9.62694	47.5621	35.8742	13.2478	P1ND	NoDiff	NoDiff			0	1	0	0	0	0	0	0	0
LOC_Os02g28170		0.442684	0.202783	0.117442	0.197962	0.087824	0.230123	0.618775	0.420375	0.677925	P1PD		P1ND			0	1	0	0	0	1	0	0	0
LOC_Os02g28300		0.320165	0.363161	0	0.15194	0.668447	0.231818	0.66489	1.69389	0.395896	P2ND	NoDiff	NoDiff			0	1	0	0	0	0	0	0	0
LOC_Os02g28334		19.2621	0.164601	7.14959	15.9481	0	8.59825	21.974	0	13.4175	P1MP	P1MP	P1MP			0	0	0	3	0	0	0	0	0
LOC_Os02g28410		0.094254	0	0	0	0.243087	0.03981	0.085635	0.581776	0.081583	P2ND		NoDiff			0	1	0	0	0	0	0	0	0
LOC_Os02g28550		0	0	0	0	0.043284	0.106328	0	0	0	NoDiff	P2POD	NoDiff			0	0	0	0	0	0	1	0	0
LOC_Os02g28620		0.446296	0.489531	0.465767	0.579499	0.331267	0.721776	1.01321	0.476338	0.686743	P1MP	P1PD	NoDiff			0	0	0	1	0	1	0	0	0
LOC_Os02g28680		0	0	0	0	0	0.21693	0.139992	0	0.177463		CPOD	NoDiff			0	0	0	0	0	0	1	0	1
LOC_Os02g28790		0	0	0	0.093487	0.096774	0	0	0	0	NoDiff	CNOD	NoDiff			1	0	0	0	0	0	0	1	0
LOC_Os02g28920		3.0664	2.29545	4.46325	2.07065	1.81803	3.69453	3.67546	4.6388	0	CNOD	NoDiff	NoDiff			1	0	0	0	0	0	0	1	0
LOC_Os02g28940		0.139714	0.832	0	0	0	0	0.126939	0	0	NoDiff	NoDiff	P2ND			0	1	0	0	0	0	0	0	0
LOC_Os02g28980		45.0288	32.9096	50.4978	62.5337	56.0457	43.5904	35.6891	41.2814	62.9743	P2POD		NoDiff	rFKBP75		0	0	0	0	0	0	1	0	0
LOC_Os02g29200		0	0	0.111499	0	0	0	0	0	0	NoDiff	NoDiff	CPOD			0	0	0	0	0	0	1	0	1
LOC_Os02g29280		0	0	0	0	0	0.134695	0	0	0.06901	CPOD	CPOD	NoDiff			0	0	0	0	0	0	2	0	2
LOC_Os02g29580		4.4043	2.4937	3.4047	2.33108	1.61529	2.22632	2.43704	2.94724	5.38823	P2PD	NoDiff	NoDiff			0	0	0	0	0	1	0	0	0
LOC_Os02g29640		1.93264	0	1.1492	2.26919	0	1.12591	2.45223	0	1.644	P1PPD	P1MP	P1MP			0	0	0	2	1	0	0	0	0
LOC_Os02g30010		0.789084	2.98323	4.89806	1.29582	0	3.02735	0	0	1.88935	NoDiff		P2PD			0	0	0	0	0	1	0	0	0
LOC_Os02g30040		0	0	0.201256	0.075888	0.16004	0.05824	0.08309	0.12096	0.198338	NoDiff	NoDiff	CPOD			0	0	0	0	0	0	1	0	1
LOC_Os02g30160		0.070309	0.111651	0.142791	0.194057	0.13092	0.04024	0.038328	0.171104	0		P1ND	NoDiff			0	1	0	0	0	0	0	0	0
LOC_Os02g30240		2.77616	2.88059	0.652807	0.419194	0.813624	0.639575	0.343951	0.445081	0.163839	NoDiff	NoDiff	P2NOD			1	0	0	0	0	0	0	0	0
LOC_Os02g30290		0	0	0	0	0	0	0.104254	0	0	P1ND	NoDiff	NoDiff			0	1	0	0	0	0	0	0	0
LOC_Os02g30340		0	0	0.008343	0.032143	0.025878	0	0.017582	0.060673	0	P2ND	CNOD	NoDiff			1	1	0	0	0	0	0	1	0
LOC_Os02g30520		0	0	0.090166	0.043425	0	0	0	0	0	NoDiff	NoDiff	CPOD			0	0	0	0	0	0	1	0	1
LOC_Os02g30600		27.4996	25.7597	11.8189	11.2875	26.2648	18.2157	24.4974	53.5714	47.757		NoDiff	P1NOD			1	0	0	0	0	0	0	0	0
LOC_Os02g30610		0	0	0	0	0.558598	0.675543	0.227058	0.705169	1.44306	P2POD	P2PD	NoDiff			0	0	0	0	0	1	1	0	0
LOC_Os02g30650		55.1992	43.0899	40.6976	33.1617	63.9321	49.1506	90.8271	107.207	145.736	P2POD	NoDiff	NoDiff			0	0	0	0	0	0	1	0	0
LOC_Os02g30714		0.7023	1.87452	1.06869	0.308054	3.59924	1.74705	0.540382	1.65172	1.1337	NoDiff	P2MP	NoDiff			0	0	0	1	0	0	0	0	0
LOC_Os02g30790		6.54281	0	2.25083	5.63687	0	2.94028	3.28104	0	1.09215		P1MP	P1MP			0	0	0	2	0	0	0	0	0
LOC_Os02g30850		80.4151	67.8388	54.1775	73.8335	59.7637	83.128	68.7804	68.6417	73.6841	NoDiff		P1ND	OsGRX8		0	1	0	0	0	0	0	0	0
LOC_Os02g30880		0.134004	0	0.231079	0.069556	0	0.084899	0.060876	0	0.086993	NoDiff	NoDiff	P1PD			0	0	0	0	0	1	0	0	0
LOC_Os02g30900		36.7744	40.2258	38.1478	38.5469	32.8657	41.4945	48.2	42.3623	56.1041	P1PD	NoDiff	NoDiff	OsPBL1		0	0	0	0	0	1	0	0	0
LOC_Os02g30910		40.5233	28.7466	25.5594	40.094	31.5864	44.2641	38.1213	28.4199	52.2591	P1POD					0	0	0	0	0	0	1	0	0
LOC_Os02g30960		0.069079	69.5325	53.8943	0	62.1463	35.211	0.102482	57.2446	39.3399	P2PPD	P2MP	P2PPD			0	0	0	1	2	0	0	0	0
LOC_Os02g31000		0.266244	0	0.367293	0.707561	0	0.269886	0.502135	0	0.368727		P1MP				0	0	0	1	0	0	0	0	0
LOC_Os02g31030		9.26301	7.35268	3.77885	4.97432	9.75079	7.09597	4.87557	8.57551	3.64959		NoDiff	P1NOD			1	0	0	0	0	0	0	0	0
LOC_Os02g31070		19.5135	18.7228	26.1375	16.7008	15.007	17.8754	17.5876	18.0302	15.5885	NoDiff	NoDiff	P1POD			0	0	0	0	0	0	1	0	0
LOC_Os02g31090		0	0	0	0	0.24203	0.17562	0.188889	0.366642	0	P2ND	NoDiff	NoDiff			0	1	0	0	0	0	0	0	0
LOC_Os02g31140		58.3202	39.3729	23.2706	38.1795	33.7393	46.6889	31.5373	49.3414	39.1224	NoDiff	NoDiff	P1ND	CFL1		0	1	0	0	0	0	0	0	0
LOC_Os02g31170		0	0.266204	0	0	0.041966	0.394531	0	0	0.230632	CPOD	P2POD				0	0	0	0	0	0	2	0	1
LOC_Os02g31230		0	0	0.261011	0.075422	0.05205	0	0	0	0	NoDiff	NoDiff	CPOD			0	0	0	0	0	0	1	0	1
LOC_Os02g31300		0.092844	0	0	0	0	0	0	0	0.080363	CPOD	NoDiff				0	0	0	0	0	0	1	0	1
LOC_Os02g31320		0	0	0.037651	0.036267	0	0.036889	0.059514	0	0			CPOD			0	0	0	0	0	0	1	0	1
LOC_Os02g31845		0	0.904726	0	0	0	0	0	0	0	NoDiff	NoDiff	P2ND			0	1	0	0	0	0	0	0	0
LOC_Os02g31860		0	0	0	0.089914	0	0	0	0	0.093713	CPOD	P1ND	NoDiff			0	1	0	0	0	0	1	0	1
LOC_Os02g31890	1	2.85368	4.92202	4.43858	3.79095	4.96486	6.847	3.14877	4.17955	5.38457		P2PD	NoDiff			0	0	0	0	0	1	0	0	0
LOC_Os02g31926		25.1854	28.4935	31.7621	17.6669	21.5554	31.0112	16.2176	23.7898	20.686	NoDiff	P2POD				0	0	0	0	0	0	1	0	0
LOC_Os02g32000		0	0	0.480305	0	0	0	0	0	0	NoDiff	NoDiff	CPOD			0	0	0	0	0	0	1	0	1
LOC_Os02g32030		1180.49	621.514	926.279	1225.1	696.43	1061.83	1077.56	737.984	1033.05			P1MP			0	0	0	1	0	0	0	0	0
LOC_Os02g32170	1	9.00916	0	2.02782	6.43248	0	0.924304	4.37371	0	0.086261	P1ND	P1ND	P1NPD			0	2	1	0	0	0	0	0	0
LOC_Os02g32250		4.59065	18.7124	8.91032	3.56423	17.4382	11.2278	4.49097	15.8152	10.7656		P2MP				0	0	0	1	0	0	0	0	0
LOC_Os02g32350		145.155	102.98	178.05	145.747	125.012	200.521	223.15	196.876	221.281	NoDiff	P1PD				0	0	0	0	0	1	0	0	0
LOC_Os02g32450		21.7825	53.3448	35.3525	21.0697	65.5048	31.8218	19.1698	61.4633	40.8881	P2MP					0	0	0	1	0	0	0	0	0
LOC_Os02g32465		0	0.410027	0	0	0.125351	0	0.132477	0	0			P2ND			0	1	0	0	0	0	0	0	0
LOC_Os02g32504		2.66306	3.65966	3.59135	4.95033	5.8595	2.85522	3.85835	4.51433	4.616	NoDiff	P2NOD	NoDiff			1	0	0	0	0	0	0	0	0
LOC_Os02g32530		23.1364	18.2236	2.32588	19.4715	4.26388	23.8109	17.7341	15.3079	19.5722	NoDiff	P1PD	P1NOD			1	0	0	0	0	1	0	0	0
LOC_Os02g32540		10.7693	8.96715	8.59043	8.32475	9.21438	9.70534	7.47109	7.56123	10.3284	P2POD	NoDiff	NoDiff			0	0	0	0	0	0	1	0	0
LOC_Os02g32680		0.205389	0.717244	0.472234	0.066334	0.286109	0.444991	0.188335	1.30799	0.296299	P2ND		NoDiff			0	1	0	0	0	0	0	0	0
LOC_Os02g32780		2.22387	0.551799	1.29059	1.74035	0.29413	0.993479	2.00109	0.490239	1.16606	P1MP	P1MP	P1MP			0	0	0	3	0	0	0	0	0
LOC_Os02g32840	1	9.39637	2.71299	2.35683	1.97602	3.00781	1.58748	1.08655	1.50645	1.98094	NoDiff	NoDiff	P1ND			0	1	0	0	0	0	0	0	0
LOC_Os02g32850		3.35293	2.19968	0.814431	0	2.47449	1.50858	0	0	1.74317	CPOD		P1NOD			1	0	0	0	0	0	1	0	1
LOC_Os02g32900		47.4658	10.0249	29.6809	40.7136	7.60945	23.7625	32.1531	7.54742	23.1936		P1MP	P1MP			0	0	0	2	0	0	0	0	0
LOC_Os02g32910		0.693368	0.49155	0.085404	0.987145	0.29804	0.460201	0.899951	0.087342	0.214344			P1ND			0	1	0	0	0	0	0	0	0
LOC_Os02g33020		0.678654	0.370352	0	0	0	0.882465	0.506164	0	0.730087	NoDiff	CPOD	NoDiff			0	0	0	0	0	0	1	0	1
LOC_Os02g33070		2.33637	4.31786	2.60188	2.5425	3.72351	7.29403	1.53715	0.568318	4.21059	P1PD	P2POD	NoDiff			0	0	0	0	0	1	1	0	0
LOC_Os02g33120		2.17313	2.488	0.96061	0.578296	0.516317	0.49508	1.51311	0.982413	1.08491	NoDiff	NoDiff	P2NOD			1	0	0	0	0	0	0	0	0
LOC_Os02g33130		0	0.335916	0	0	0	0	0	0	0	NoDiff	NoDiff	P2ND			0	1	0	0	0	0	0	0	0
LOC_Os02g33160		0	0	0.706865	0.252991	0	0.33248	0	0	0	NoDiff	NoDiff	CPOD			0	0	0	0	0	0	1	0	1
LOC_Os02g33200		0.175206	0	0.151064	0.145506	0.112967	0.185002	0.079592	0	0.379135	P1POD	NoDiff	NoDiff			0	0	0	0	0	0	1	0	0
LOC_Os02g33250		0.578159	0	0	0.131699	0	0	0	0	0	NoDiff	NoDiff	P1ND			0	1	0	0	0	0	0	0	0
LOC_Os02g33310		0.738344	1.35436	2.95537	1.72459	2.6292	1.98194	1.51961	1.78387	1.77234	NoDiff	NoDiff	P2POD			0	0	0	0	0	0	1	0	0
LOC_Os02g33330		1.84387	18.1413	7.7416	4.12788	23.0191	9.61632	8.81332	17.814	11.5884		P2MP	P2MP			0	0	0	2	0	0	0	0	0
LOC_Os02g33380		18.2859	13.8563	20.6727	16.6355	20.226	19.0415	15.0282	22.8814	23.7745	P2PD	NoDiff	P1PD			0	0	0	0	0	2	0	0	0
LOC_Os02g33420		163.011	180.686	212.906	139.261	216.497	223.135	150.365	188.119	192.91		P2PD	P2POD			0	0	0	0	0	1	1	0	0
LOC_Os02g33540		4.14458	0	5.81514	3.82207	0.331905	3.56448	1.32727	0.395265	1.86475	NoDiff		P1PD			0	0	0	0	0	1	0	0	0
LOC_Os02g33670		10.3505	13.3682	21.5118	7.6951	9.20907	8.39979	9.23979	8.05075	9.35037	NoDiff	NoDiff	P2POD			0	0	0	0	0	0	1	0	0
LOC_Os02g33710		431.306	380.132	285.064	386.329	351.588	363.679	259.384	289.602	307.165	NoDiff	NoDiff	P1ND			0	1	0	0	0	0	0	0	0
LOC_Os02g33800		0	0.335941	0	0	0.280835	0.159584	0.171642	1.33267	0	CNOD	NoDiff				1	0	0	0	0	0	0	1	0
LOC_Os02g33890		0.051976	0	0	0	0	0	0	0	0	NoDiff	NoDiff	P1ND			0	1	0	0	0	0	0	0	0
LOC_Os02g33910		0.170861	0.182625	0.448988	0.021831	0.350269	0.333072	0.083589	0.301322	0.273032	NoDiff		P2POD			0	0	0	0	0	0	1	0	0
LOC_Os02g34330		0	0.189366	0	0	0	0	0	0.229166	0	P2ND	NoDiff	P2ND			0	2	0	0	0	0	0	0	0
LOC_Os02g34340		0	0	0.211263	0.237405	0.105323	0.170098	0.185516	0	0.176739	NoDiff	NoDiff	CPOD			0	0	0	0	0	0	1	0	1
LOC_Os02g34460		118.759	103.865	85.1955	88.9342	85.9575	88.6893	81.3146	85.3883	74.8114	NoDiff	NoDiff	P1ND			0	1	0	0	0	0	0	0	0
LOC_Os02g34470		53.5902	31.0794	42.5765	32.9966	35.1101	49.0015	34.5522	26.0737	37.8928	NoDiff	P2POD	NoDiff			0	0	0	0	0	0	1	0	0
LOC_Os02g34500		53.2307	50.5294	59.0911	50.2108	42.7719	49.6064	41.8221	38.5021	54.8353	P1POD	NoDiff				0	0	0	0	0	0	1	0	0
LOC_Os02g34540		4.38616	4.24674	2.2603	4.52556	3.82821	4.11637	5.76118	6.02976	6.7381	NoDiff	NoDiff	P1NOD			1	0	0	0	0	0	0	0	0
LOC_Os02g34560		154.527	67.0917	62.1462	64.5241	77.3706	88.0078	56.2591	55.4113	57.6876	NoDiff	NoDiff	P1ND	OsCYT-INV1; SRT5		0	1	0	0	0	0	0	0	0
LOC_Os02g34630		108.589	74.7125	16.3493	94.6349	65.2917	88.2573	78.6581	52.6704	70.2943	NoDiff	NoDiff	P1NOD			1	0	0	0	0	0	0	0	0
LOC_Os02g34650		3.54532	0.924113	2.71716	2.40901	1.46376	2.77518	2.9283	1.8315	2.36894	NoDiff	P1PD	P1MP			0	0	0	1	0	1	0	0	0
LOC_Os02g34710		0.138984	0	0.249022	0	0	0	0	0.848909	0.124997	P2ND	NoDiff				0	1	0	0	0	0	0	0	0
LOC_Os02g34750		3.10239	3.31882	3.28548	3.38927	2.63938	3.90659	2.37102	2.21219	2.53456	NoDiff	P1PD	NoDiff			0	0	0	0	0	1	0	0	0
LOC_Os02g35060		13.6709	9.39072	7.44287	11.1786	9.28014	14.9867	11.0565	12.1094	11.9083	NoDiff	P1PD	P1ND			0	1	0	0	0	1	0	0	0
LOC_Os02g35180		13.4446	13.8035	13.5403	9.26718	12.7516	7.45289	6.11257	9.03732	5.02472		P2ND	NoDiff	OsRR2		0	1	0	0	0	0	0	0	0
LOC_Os02g35310		20.5012	15.8224	13.3006	17.2661	16.5514	16.171	16.8249	18.8697	24.044	P2POD	NoDiff				0	0	0	0	0	0	1	0	0
LOC_Os02g35470		128.203	103.257	135.618	92.1026	109.694	124.966	86.2593	69.785	82.9733	NoDiff	P2POD	P1PD			0	0	0	0	0	1	1	0	0
LOC_Os02g35480		35.6498	26.3009	42.0315	36.3287	31.7222	36.552	27.8496	23.3882	27.0363	NoDiff	NoDiff	P1PD			0	0	0	0	0	1	0	0	0
LOC_Os02g35490		0.055344	0	0	0.030641	0.079298	0.031167	0	0	0.111776	CPOD					0	0	0	0	0	0	1	0	1
LOC_Os02g35500		35.3519	27.5626	22.2077	40.9407	48.5659	43.952	40.7657	33.5113	36.8485	NoDiff	NoDiff	P1ND			0	1	0	0	0	0	0	0	0
LOC_Os02g35660	1	0	0	0	0.052272	0.432885	0	0	0	0	NoDiff	CNOD	NoDiff			1	0	0	0	0	0	0	1	0
LOC_Os02g35670		0	0	1.68057	0	0	1.0924	0	0	0	NoDiff	CPOD	CPOD			0	0	0	0	0	0	2	0	2
LOC_Os02g35700		19.103	43.8171	38.1612	27.9296	21.6431	54.8631	20.0687	45.3267	49.3932		P1PD	NoDiff			0	0	0	0	0	1	0	0	0
LOC_Os02g35720		13.3002	7.60236	0	5.47563	8.63327	9.484	16.5494	0	11.1291		NoDiff	P1ND			0	1	0	0	0	0	0	0	0
LOC_Os02g35870		28.9589	22.8667	38.3412	27.6865	26.9039	27.8094	12.5858	5.89013	44.1313	P1POD	NoDiff	NoDiff			0	0	0	0	0	0	1	0	0
LOC_Os02g36050		0	0	0.325772	0.235341	0	0.075299	0	0.111056	0	NoDiff	NoDiff	CPOD			0	0	0	0	0	0	1	0	1
LOC_Os02g36140		0	0.111393	0	0	0	0.074894	0	0	0	NoDiff	CPOD	P2ND	OsDTC1; OsKS3		0	1	0	0	0	0	1	0	1
LOC_Os02g36160		0.101913	0	0.248104	0	0	0.243077	0	0.465181	0		CPOD				0	0	0	0	0	0	1	0	1
LOC_Os02g36170		0	0.112894	0.196147	0	0	0	0	0.100299	0	NoDiff	NoDiff	P2PD			0	0	0	0	0	1	0	0	0
LOC_Os02g36180		0.101913	0	0.248104	0	0	0.243077	0	0.465181	0		CPOD				0	0	0	0	0	0	1	0	1
LOC_Os02g36360	1	0.671807	9.31237	9.80494	6.94032	19.2198	9.26372	26.1929	22.4307	1.28477	P1NOD	NoDiff	NoDiff			1	0	0	0	0	0	0	0	0
LOC_Os02g36400		22.5296	18.2571	16.5516	21.0077	19.4274	28.928	14.9586	12.0719	18.129	NoDiff	P1POD	NoDiff			0	0	0	0	0	0	1	0	0
LOC_Os02g36480		0.210834	0	0	0.107382	0	0	0	0	0	NoDiff		P1ND			0	1	0	0	0	0	0	0	0
LOC_Os02g36710		187.725	148.524	101.205	222.941	252.321	223.587	173.577	155.599	183.127	NoDiff	NoDiff	P1ND			0	1	0	0	0	0	0	0	0
LOC_Os02g36740		23.8129	36.2186	31.7986	8.81075	11.635	39.1796	27.1976	21.0316	35.7272		P2POD	NoDiff			0	0	0	0	0	0	1	0	0
LOC_Os02g36790		0.332144	1.2583	1.26671	0.445736	1.43121	1.1274	0.522958	0.463814	1.21808	P1POD					0	0	0	0	0	0	1	0	0
LOC_Os02g36910		0	0.126185	0	0	0	0.103103	0	0	0	NoDiff	CPOD				0	0	0	0	0	0	1	0	1
LOC_Os02g36924	1	0.218567	0.244976	0.937514	0.998012	0.215851	0.41579	0.336292	0.543534	0.306524	NoDiff	NoDiff	P2POD			0	0	0	0	0	0	1	0	0
LOC_Os02g36940		1.45968	0.798616	0	0.763717	2.11727	1.35579	0.731072	1.72312	1.18452	NoDiff	NoDiff	P1ND			0	1	0	0	0	0	0	0	0
LOC_Os02g36960		35.5073	33.992	22.7872	30.5126	28.601	29.9293	24.4329	21.6664	24.1065	NoDiff	NoDiff	P1NOD			1	0	0	0	0	0	0	0	0
LOC_Os02g36974		426.487	412.34	227.858	387.127	294.929	260.201	377.379	457.991	445.274	NoDiff	NoDiff	P1NOD	GF14e; 14-3-3;GID2		1	0	0	0	0	0	0	0	0
LOC_Os02g37010		0.118359	0	0	0	0	0	0	0	0	NoDiff	NoDiff	P1ND			0	1	0	0	0	0	0	0	0
LOC_Os02g37094		0.077499	0	0.412058	0.128724	0.066625	0.065466	0.070412	0	0.201244	NoDiff	NoDiff	P1POD			0	0	0	0	0	0	1	0	0
LOC_Os02g37430		1095.39	603.975	591.689	523.732	429.337	622.824	677.442	649.216	717.881	NoDiff	NoDiff	P1ND			0	1	0	0	0	0	0	0	0
LOC_Os02g37560		0	0.137799	0	0	0	0	0	0	0	NoDiff	NoDiff	P2ND			0	1	0	0	0	0	0	0	0
LOC_Os02g37590		173.29	111.193	178.01	134.926	96.5183	121.501	92.4569	76.366	90.61	NoDiff	NoDiff	P1PD			0	0	0	0	0	1	0	0	0
LOC_Os02g37800		0	0	0.193222	0	0.160549	0.220858	0	1.91022	0.678922	P2MP	NoDiff	NoDiff			0	0	0	1	0	0	0	0	0
LOC_Os02g37870		32.1482	23.8959	32.9134	23.4426	21.7412	31.1434	28.9124	23.2691	30.8274		P1POD				0	0	0	0	0	0	1	0	0
LOC_Os02g37970		0.668479	0.552888	0	0.323845	0.766244	0.847028	1.41715	0	1.10902		NoDiff	P1ND			0	1	0	0	0	0	0	0	0
LOC_Os02g38000		0.464041	0.279129	0.072745	0.175173	0.060444	0.332598	0.229968	0.247988	0.243432	NoDiff	P1POD	P1NOD			1	0	0	0	0	0	1	0	0
LOC_Os02g38010		0.342559	0	0	0	0	0.093018	0	0	0	NoDiff	NoDiff	P1ND			0	1	0	0	0	0	0	0	0
LOC_Os02g38040		0.230656	0	0	0.246287	0	0.222147	0.299377	0.464882	0.598948	P2POD		P1ND			0	1	0	0	0	0	1	0	0
LOC_Os02g38090	1	1.56976	0.373918	0.216555	0.469322	0.701744	0.636494	1.65442	1.43955	1.5218	NoDiff	NoDiff	P1ND			0	1	0	0	0	0	0	0	0
LOC_Os02g38190		149.969	76.9975	66.0094	120.817	114.783	137.054	146.087	120.913	136.967	NoDiff	NoDiff	P1ND			0	1	0	0	0	0	0	0	0
LOC_Os02g38240		18.6529	14.8938	14.7635	24.0468	15.5583	34.5239	15.7022	13.4215	15.0434	NoDiff	P1POD	NoDiff			0	0	0	0	0	0	1	0	0
LOC_Os02g38300		28.3563	18.8314	13.4611	11.4145	10.0074	12.9616	19.4714	16.5252	21.2319	NoDiff	NoDiff	P1ND			0	1	0	0	0	0	0	0	0
LOC_Os02g38350		57.857	94.6404	53.7533	96.8886	65.3198	61.8791	79.6213	119.728	61.072	P2ND					0	1	0	0	0	0	0	0	0
LOC_Os02g38494		8.75709	8.84253	4.70982	12.5002	7.61839	10.5498	6.47093	7.43129	9.44603			P2NOD			1	0	0	0	0	0	0	0	0
LOC_Os02g38530		0	0	6.06527	0	0	4.46163	0	0	0	NoDiff	CPOD	CPOD			0	0	0	0	0	0	2	0	2
LOC_Os02g38550		0.378185	0.566262	0.793173	0.693331	0.255879	0.713644	1.01955	0.388453	0.644443			P2PD			0	0	0	0	0	1	0	0	0
LOC_Os02g38580		9.05907	9.26491	5.11926	12.6158	7.59484	11.1419	6.74508	8.54513	9.70985	NoDiff		P2NOD			1	0	0	0	0	0	0	0	0
LOC_Os02g38610		0.587176	0	1.68756	0.487643	0.252394	1.0411	0.400113	0.480004	0.762368	NoDiff	NoDiff	P1POD			0	0	0	0	0	0	1	0	0
LOC_Os02g38650		0.385457	0.304413	0.813127	0.587378	0.345581	0.485881	1.10085	0.450754	0.648959	NoDiff	NoDiff	P1PD			0	0	0	0	0	1	0	0	0
LOC_Os02g38680		140.227	62.3545	99.123	118.185	49.9289	87.9952	110.6	51.2979	75.1413			P1MP			0	0	0	1	0	0	0	0	0
LOC_Os02g38690		3.31487	4.10011	2.05354	7.48368	3.30908	4.91095	3.43995	4.53426	3.124		P1MP	P2NOD			1	0	0	1	0	0	0	0	0
LOC_Os02g38710		0.470757	0.535398	0.589793	0.163963	0.911389	1.87007	0.269065	1.26215	0.550852	NoDiff	P2POD	NoDiff			0	0	0	0	0	0	1	0	0
LOC_Os02g38750		0	0	0	0	57.2766	0	90.893	79.249	0	CNOD	NoDiff	NoDiff			1	0	0	0	0	0	0	1	0
LOC_Os02g38760		0	0	0	0	0	0	0	0.130989	0	P2ND	NoDiff	NoDiff			0	1	0	0	0	0	0	0	0
LOC_Os02g38780		2.1813	4.87344	2.84936	0.943382	4.25937	3.7754	1.63342	5.4202	3.70752	P2MP					0	0	0	1	0	0	0	0	0
LOC_Os02g38820		25.4146	6.69404	16.6612	25.8412	9.45338	16.6713	24.2151	7.87773	16.0397	NoDiff		P1MP	CycF2;3		0	0	0	1	0	0	0	0	0
LOC_Os02g38920		111.84	0	241.891	191.483	52.7696	77.8468	187.078	67.3797	98.2485	NoDiff	NoDiff	P1PD			0	0	0	0	0	1	0	0	0
LOC_Os02g38980		6.13251	10.34	4.80327	6.00215	4.97549	59.704	4.59893	27.3508	5.49193	NoDiff	P1POD	NoDiff			0	0	0	0	0	0	1	0	0
LOC_Os02g39110		5.6563	5.48607	5.73807	5.12512	4.67089	7.60666	5.78915	4.21857	5.59336	NoDiff	P1POD	NoDiff			0	0	0	0	0	0	1	0	0
LOC_Os02g39155		0.246881	0	0	0	0.150337	0.104274	0.224306	0.435387	0	P2ND	NoDiff	NoDiff			0	1	0	0	0	0	0	0	0
LOC_Os02g39280		0	0	0.260446	0.274135	0.394593	0	0	0	0	NoDiff	P2ND	NoDiff			0	1	0	0	0	0	0	0	0
LOC_Os02g39300		45.3163	38.3749	55.6522	39.1834	38.7796	49.5953	39.2533	33.3976	39.4959	NoDiff	P1POD	P1POD			0	0	0	0	0	0	2	0	0
LOC_Os02g39350		40.6287	30.7225	48.1264	32.344	28.8719	43.8526	36.213	21.8184	33.044		P1POD	P1PD			0	0	0	0	0	1	1	0	0
LOC_Os02g39380		0	0	0	0.064058	0	0	0	0.136027	0	P2ND	NoDiff	NoDiff	OsCML17		0	1	0	0	0	0	0	0	0
LOC_Os02g39410		6.34255	5.00742	6.28418	5.9322	4.55291	6.43833	5.26628	5.10712	2.51291	P1NOD		NoDiff			1	0	0	0	0	0	0	0	0
LOC_Os02g39450		0	0	0	0	0	0	0	0.521281	0.230532	P2MP	NoDiff	NoDiff			0	0	0	1	0	0	0	0	0
LOC_Os02g39530		32.5774	19.1199	26.1503	24.2262	25.9823	39.6387	26.9419	21.4097	33.571	P1PD	P2POD	NoDiff			0	0	0	0	0	1	1	0	0
LOC_Os02g39540		56.205	34.712	21.9493	21.9023	25.2115	41.6961	13.8982	30.9499	12.4112	NoDiff	NoDiff	P1ND			0	1	0	0	0	0	0	0	0
LOC_Os02g39550		108.31	95.9195	113.262	110.865	86.086	117.151	95.8995	95.3106	124.823	P1POD		NoDiff			0	0	0	0	0	0	1	0	0
LOC_Os02g39560		0.198125	0.272514	1.20693	1.40284	0.562828	2.44904	2.15096	0.846991	2.12579		P1POD	P2PD			0	0	0	0	0	1	1	0	0
LOC_Os02g39570		53.352	65.2106	91.7707	81.6522	55.4469	81.7262	44.1491	28.029	44.3231	NoDiff	NoDiff	P2PD			0	0	0	0	0	1	0	0	0
LOC_Os02g39590		0.322657	0.213492	0.092732	0.178642	0.244637	0.31136	0.342012	0.663859	0.186189	P2ND	NoDiff	NoDiff			0	1	0	0	0	0	0	0	0
LOC_Os02g39600		14.2367	8.51327	8.25498	11.2132	6.48908	17.9448	6.82156	8.23173	7.99955	NoDiff	P1PD	NoDiff			0	0	0	0	0	1	0	0	0
LOC_Os02g39680		5.47222	2.3269	2.89738	3.79678	2.25067	6.14687	3.73444	2.54465	1.96168	NoDiff	P1PD	NoDiff			0	0	0	0	0	1	0	0	0
LOC_Os02g39710		17.8645	10.3728	7.17758	8.81357	8.63316	9.06646	11.8913	10.0414	9.4949	NoDiff	NoDiff	P1ND	OsCOL4		0	1	0	0	0	0	0	0	0
LOC_Os02g39764		0.698697	0	0.314158	0.535431	0.191937	0.705533	1.67934	0.242694	0.745131	P1MP		NoDiff			0	0	0	1	0	0	0	0	0
LOC_Os02g39790		4.20471	5.87471	7.8186	2.55766	5.41347	5.71597	4.76164	3.38135	39.7965	P1POD	NoDiff	NoDiff			0	0	0	0	0	0	1	0	0
LOC_Os02g39800		0	0	0	5.27164	4.53324	7.54373	0	0	3.92454	CPOD	P1POD	NoDiff			0	0	0	0	0	0	2	0	1
LOC_Os02g39970		19.969	64.9312	60.6349	24.8915	71.1605	69.8403	19.2899	51.5905	57.9428	P2PD	P2PD	P2PD			0	0	0	0	0	3	0	0	0
LOC_Os02g40050		0.450737	0.070831	0.207269	0.224599	0.143695	0.187203	0.327617	0.73197	0.097537	P2ND	NoDiff	NoDiff			0	1	0	0	0	0	0	0	0
LOC_Os02g40110		0	0	0	0	0	0.105044	0.076805	0	0	NoDiff	CPOD	NoDiff			0	0	0	0	0	0	1	0	1
LOC_Os02g40120		2.94928	0	0	3.20501	0.584315	2.98609	2.64705	0	1.71237	P1MP	P1PD	P1ND			0	1	0	1	0	1	0	0	0
LOC_Os02g40130		0	17.848	7.01028	0.06561	17.7872	7.66346	0.071778	15.3951	8.86852	P2MP	P2MP	P2MP			0	0	0	3	0	0	0	0	0
LOC_Os02g40320		3.09655	0	5.11725	3.01084	0	3.22782	2.3558	3.24517	0	NoDiff	NoDiff	P1PD			0	0	0	0	0	1	0	0	0
LOC_Os02g40340		13.0333	2.89167	9.53064	12.5357	3.89364	12.2761	14.4586	3.82344	13.3639	P1PD					0	0	0	0	0	1	0	0	0
LOC_Os02g40390		4.78343	4.41947	5.42255	4.19944	3.7758	6.60141	5.28915	4.54921	5.09711	NoDiff	P1POD	NoDiff			0	0	0	0	0	0	1	0	0
LOC_Os02g40420		11.7611	8.06336	13.4396	10.4868	8.7042	10.5747	10.4172	6.80293	11.2387		NoDiff	P1PD			0	0	0	0	0	1	0	0	0
LOC_Os02g40470		1.49025	0.447449	0.944466	1.93364	0.420063	0.943605	2.01558	0	1.58926	P1PD	P1MP	P1MP			0	0	0	2	0	1	0	0	0
LOC_Os02g40510		31.4403	26.9204	25.2408	26.2833	22.4879	26.0353	25.1116	23.6481	33.7118	P1POD	NoDiff				0	0	0	0	0	0	1	0	0
LOC_Os02g40520		0	0	0	0	0	0	0.140993	0.547344	0	CNOD	NoDiff	NoDiff			1	0	0	0	0	0	0	1	0
LOC_Os02g40570		0.047802	0.142327	0.32771	0.039699	0.241036	0.151421	0	0.168599	0.196533	NoDiff	NoDiff	P2PD			0	0	0	0	0	1	0	0	0
LOC_Os02g40580		0.541824	0.383904	0.825989	0.769767	0.295776	0.844156	1.26262	0.365043	0.822222	P1MP					0	0	0	1	0	0	0	0	0
LOC_Os02g40590		0	0	0	0	0	0	0	0	0.176574	CPOD	NoDiff	NoDiff			0	0	0	0	0	0	1	0	1
LOC_Os02g40600		0	0	0.152913	0	0.076233	0	0	0	0.01599	NoDiff	NoDiff	CPOD			0	0	0	0	0	0	1	0	1
LOC_Os02g40830		65.517	49.6223	49.4816	72.491	48.1051	51.9321	48.9014	39.2541	53.6759	P1PD	P1ND	P1ND			0	2	0	0	0	1	0	0	0
LOC_Os02g40880		120.261	78.5443	84.2559	230.324	198.796	87.0354	475.461	360.362	396.305	NoDiff	P1ND	NoDiff			0	1	0	0	0	0	0	0	0
LOC_Os02g40920		0	0	0.335812	0.250899	0.22863	0.225653	0	0	0.298043	CPOD	NoDiff	CPOD			0	0	0	0	0	0	2	0	2
LOC_Os02g40930		0	0.203743	0	0	0.058826	0.36451	0	0	0	NoDiff	P2POD	NoDiff			0	0	0	0	0	0	1	0	0
LOC_Os02g41460		2.46105	2.39674	1.76191	1.28257	3.53413	1.29148	1.15308	4.69239	1.85996	P2ND	P2ND	NoDiff			0	2	0	0	0	0	0	0	0
LOC_Os02g41550		60.3919	41.0911	69.5472	40.0477	45.2674	45.3376	42.7643	42.0114	40.6711	NoDiff	NoDiff	P1PD			0	0	0	0	0	1	0	0	0
LOC_Os02g41680		3.26397	4.94804	2.79206	3.37236	8.07871	3.51533	2.82541	8.47564	4.22669		P2ND		OsPAL4		0	1	0	0	0	0	0	0	0
LOC_Os02g41710		0.055564	0.220589	0	0.046146	0.143303	0.234684	0.050484	0.29397	0.144284		P2PD				0	0	0	0	0	1	0	0	0
LOC_Os02g41770		0.939442	0	0	0	0	0	0	0	0	NoDiff	NoDiff	P1ND			0	1	0	0	0	0	0	0	0
LOC_Os02g41810		0	0.351115	0	0	0	0	0	0	0	NoDiff	NoDiff	P2ND			0	1	0	0	0	0	0	0	0
LOC_Os02g41860		0.435228	0.931878	4.50784	2.91578	2.7983	2.41807	0.27701	0.472128	0.258203	NoDiff	NoDiff	P2POD			0	0	0	0	0	0	1	0	0
LOC_Os02g41920		0	0	0.244861	0.103186	0	0	0	0	0	NoDiff	NoDiff	CPOD			0	0	0	0	0	0	1	0	1
LOC_Os02g41954		11.3554	2.30598	2.49268	6.57014	2.84045	4.62044	2.85491	3.72806	5.7568	NoDiff	NoDiff	P1ND			0	1	0	0	0	0	0	0	0
LOC_Os02g42060		0	0	0.649511	1.07611	1.44426	2.89109	2.86066	2.59583	7.5251	P1POD	NoDiff	NoDiff	OsRR11		0	0	0	0	0	0	1	0	0
LOC_Os02g42150		0.283552	0	0.349259	0.423043	0	0.13231	0.617563	0	0.328246	P1MP	P1MP	P1PD	OsWAK14		0	0	0	2	0	1	0	0	0
LOC_Os02g42290		99.5114	63.6323	35.3409	13.4281	18.08	63.3753	9.64335	46.9595	12.6431	NoDiff	P2POD	P1ND			0	1	0	0	0	0	1	0	0
LOC_Os02g42520		9.49333	8.44876	9.21272	7.6018	10.2235	11.5732	11.4161	10.4609	12.2043	NoDiff	P2PD	NoDiff			0	0	0	0	0	1	0	0	0
LOC_Os02g42560		71.0964	48.1001	27.4544	41.6383	31.266	38.77	30.595	29.4445	31.1085	NoDiff	NoDiff	P1NOD			1	0	0	0	0	0	0	0	0
LOC_Os02g42750		0.810407	1.92897	2.33783	1.4389	1.75583	2.88142	1.7922	2.19096	2.59907	NoDiff	P2PD				0	0	0	0	0	1	0	0	0
LOC_Os02g42780		0	0.060796	0.052815	0.025436	0.078992	0.025872	0.055655	0.162042	0	P2ND	NoDiff	NoDiff	SIT1		0	1	0	0	0	0	0	0	0
LOC_Os02g42860		67.2881	44.5514	57.5228	44.3732	45.4724	43.2873	50.3858	42.9956	55.7742	P1PD	NoDiff	P1MP			0	0	0	1	0	1	0	0	0
LOC_Os02g43000		0.493762	0	0	0.171106	0	0	0	0	0	NoDiff	NoDiff	P1ND			0	1	0	0	0	0	0	0	0
LOC_Os02g43010		15.4475	19.1201	21.7484	17.9825	13.0459	26.6375	12.9584	13.7476	16.9811	NoDiff	P1POD		OsVPE3		0	0	0	0	0	0	1	0	0
LOC_Os02g43060		2.87655	2.8949	1.43589	1.39067	1.95232	1.66257	2.33841	1.86898	1.50703	NoDiff	NoDiff	P2NOD			1	0	0	0	0	0	0	0	0
LOC_Os02g43080		110.348	47.6916	90.7164	106.726	37.8625	81.4231	87.6478	37.4954	66.2706		P1MP				0	0	0	1	0	0	0	0	0
LOC_Os02g43090		26.3039	39.995	46.0539	50.9754	27.4062	56.9131	36.922	36.559	38.6963	NoDiff	P1PD	P2PD			0	0	0	0	0	2	0	0	0
LOC_Os02g43180		11.6837	33.7369	46.6825	13.0894	16.4958	44.0612	13.2418	26.0087	30.6319		P2POD	P2PD	OsGRX10		0	0	0	0	0	1	1	0	0
LOC_Os02g43340		1.10608	5.11453	1.16647	4.47577	4.69604	0.682505	4.86768	5.04754	4.10894	NoDiff	P2NOD				1	0	0	0	0	0	0	0	0
LOC_Os02g43350		27.0324	25.9669	17.342	28.8592	22.2307	34.0357	19.9868	18.2887	29.5621	P1PD		NoDiff			0	0	0	0	0	1	0	0	0
LOC_Os02g43370		16.1233	12.2841	13.0347	11.7758	8.91913	16.0849	5.62206	10.6284	11.5266		P1PD	NoDiff	OsYSL2		0	0	0	0	0	1	0	0	0
LOC_Os02g43420		1.63858	0	0.474227	1.2609	0	0.822755	1.83231	1.39434	0.238039	P1NOD	NoDiff				1	0	0	0	0	0	0	0	0
LOC_Os02g43450		0.213077	0.272803	0.620048	0.020819	0.406472	0.359987	0.091103	0.419983	0.334125	NoDiff		P2POD			0	0	0	0	0	0	1	0	0
LOC_Os02g43560	1	9.47836	12.3324	8.17878	5.50013	9.69267	5.98812	4.12162	8.38894	4.50125			P2ND			0	1	0	0	0	0	0	0	0
LOC_Os02g43590		35.1174	27.9799	29.3819	28.6184	24.8393	27.0374	30.2109	18.737	25.5326	P1MP	NoDiff				0	0	0	1	0	0	0	0	0
LOC_Os02g43670		13.3483	11.7091	13.507	12.2696	10.3418	13.3227	14.6211	12.3064	16.5557	P1PD		NoDiff			0	0	0	0	0	1	0	0	0
LOC_Os02g43820	1	0.210928	2.09346	0.290982	0.455449	1.66825	0.819616	0.459937	0.743965	0.401662	NoDiff		P2ND			0	1	0	0	0	0	0	0	0
LOC_Os02g43830		110.304	92.2027	68.8033	72.6361	82.4625	87.8929	86.0057	80.7025	97.7305	NoDiff	NoDiff	P1NOD			1	0	0	0	0	0	0	0	0
LOC_Os02g43840		0	0.467484	0.406113	1.02683	0.860466	1.44232	0.53493	1.03832	1.68175	P2PD	NoDiff	NoDiff			0	0	0	0	0	1	0	0	0
LOC_Os02g43880		0	0	0.232695	0.063038	0	0	0	0.237976	0.116802	NoDiff	NoDiff	CPOD			0	0	0	0	0	0	1	0	1
LOC_Os02g43906		8.35621	13.7456	16.8882	7.4722	11.7036	11.2734	11.41	8.44529	13.0666		NoDiff	P2PD			0	0	0	0	0	1	0	0	0
LOC_Os02g43912		0	0	0.417015	0.328861	0.532258	0	0	0	0.104761	NoDiff	CNOD	CPOD			1	0	0	0	0	0	1	1	1
LOC_Os02g44000		5.65313	4.37312	1.04816	3.41878	3.96958	3.57878	3.88711	7.9223	4.00466		NoDiff	P1ND			0	1	0	0	0	0	0	0	0
LOC_Os02g44010		10.617	22.5928	25.7247	22.3175	15.3231	20.5257	15.9958	16.7182	20.1374	NoDiff	NoDiff	P2PD			0	0	0	0	0	1	0	0	0
LOC_Os02g44040		19.1179	12.778	8.61518	9.35278	8.24722	9.77823	11.7636	12.6928	10.5134	NoDiff	NoDiff	P1ND			0	1	0	0	0	0	0	0	0
LOC_Os02g44104		25.7799	24.4913	24.1558	21.5439	12.8826	25.3548	1.99367	24.0813	24.5922	P2PD		NoDiff			0	0	0	0	0	1	0	0	0
LOC_Os02g44120	1	0	0	0	0	0	0	0	0	0.024016	CPOD	NoDiff	NoDiff			0	0	0	0	0	0	1	0	1
LOC_Os02g44136		0.197397	0.344789	0.494354	0.443277	0.615974	0.631518	0.411657	0.181034	0.745144	P1POD	NoDiff	NoDiff			0	0	0	0	0	0	1	0	0
LOC_Os02g44170		0	0	0.268719	0	0	0.963306	0	0	0.402665	CPOD	CPOD	NoDiff			0	0	0	0	0	0	2	0	2
LOC_Os02g44180		1.94576	1.58828	3.25506	2.1463	1.84339	3.06924	1.12507	1.23045	1.71474	NoDiff		P1POD			0	0	0	0	0	0	1	0	0
LOC_Os02g44190		0	0	0.357365	0.286849	0.118774	0.21719	0.345196	0.121825	0.17938	NoDiff	NoDiff	CPOD			0	0	0	0	0	0	1	0	1
LOC_Os02g44230		3.19847	8.70399	14.441	5.59219	20.2953	7.21902	4.33301	18.4569	11.3359			P2PD	OsTPP1		0	0	0	0	0	1	0	0	0
LOC_Os02g44470		3.28199	2.24577	0	2.04258	3.13856	2.00386	2.60703	0	0		NoDiff	CNOD			1	0	0	0	0	0	0	1	0
LOC_Os02g44490		0	0	0.144091	0.046264	0	0.094114	0	0	0.048219	NoDiff		CPOD			0	0	0	0	0	0	1	0	1
LOC_Os02g44670		0.372865	0.740138	0	0.123864	0	0	0	0	0	NoDiff	NoDiff	P2ND			0	1	0	0	0	0	0	0	0
LOC_Os02g44690		56.2213	41.1902	84.0646	30.8831	29.5734	79.3727	39.9555	34.1493	40.6964	NoDiff	P1POD	P1PD			0	0	0	0	0	1	1	0	0
LOC_Os02g44700		0.081763	0.081151	0	0.033952	0	0.18747	0.04245	0	0.040441	NoDiff	P1POD	P1ND			0	1	0	0	0	0	1	0	0
LOC_Os02g44720		9.42036	8.81763	5.15073	6.6786	10.3372	5.82269	10.3334	8.50925	10.4743	NoDiff	P2ND	P1NOD			1	1	0	0	0	0	0	0	0
LOC_Os02g44810		65.1351	43.6537	59.7764	49.9491	41.7117	52.3656	55.9192	43.931	53.5702		P1PD				0	0	0	0	0	1	0	0	0
LOC_Os02g44840		3.11532	2.44552	1.16884	1.94914	3.0844	1.62074	3.04309	4.97616	3.53551			P1ND			0	1	0	0	0	0	0	0	0
LOC_Os02g44890		70.8053	58.7047	49.7788	62.978	48.4941	6.95563	50.0457	43.6553	57.0972	NoDiff	P1NOD	NoDiff			1	0	0	0	0	0	0	0	0
LOC_Os02g44950		0	0	0	0	0	0.103103	0	0	0	NoDiff	CPOD	NoDiff			0	0	0	0	0	0	1	0	1
LOC_Os02g44990		6.03835	3.87102	1.90425	3.02448	2.90863	2.91757	2.86051	2.23752	4.02675	NoDiff	NoDiff	P1ND	MAIF1		0	1	0	0	0	0	0	0	0
LOC_Os02g45020		0	0	0.08069	0	0	0	0	0	0	NoDiff	NoDiff	CPOD			0	0	0	0	0	0	1	0	1
LOC_Os02g45054	1	11.9089	14.3456	7.31758	7.24965	13.1469	5.77794	5.59478	15.2889	7.585			P2ND			0	1	0	0	0	0	0	0	0
LOC_Os02g45220		0	0	0.253134	0.243822	0	0	0	0	0	NoDiff		CPOD			0	0	0	0	0	0	1	0	1
LOC_Os02g45270		0.282884	0.449223	0.022359	0.046987	0.359723	0.238961	0.216323	0.299329	0.097943	NoDiff	NoDiff	P2ND			0	1	0	0	0	0	0	0	0
LOC_Os02g45290		0	0	0	0	0	0.103103	0	0	0	NoDiff	CPOD	NoDiff			0	0	0	0	0	0	1	0	1
LOC_Os02g45370		0	0.080558	0.27993	0	0.162815	0.182625	0	0.262425	0.117092			P2POD			0	0	0	0	0	0	1	0	0
LOC_Os02g45460		0	0	0.205093	0	0	0	0	0	0	NoDiff	NoDiff	CPOD			0	0	0	0	0	0	1	0	1
LOC_Os02g45490		32.3206	20.0001	19.4527	15.9446	20.8445	35.45	27.5566	29.9584	33.3353	NoDiff	P2POD	NoDiff			0	0	0	0	0	0	1	0	0
LOC_Os02g45580		0	0.350611	0.304583	0.29338	1.36662	1.34285	0.320959	0	0.152886	NoDiff	P2PD	NoDiff			0	0	0	0	0	1	0	0	0
LOC_Os02g45800		0.393534	0.448056	1.00296	0.764069	0.527777	1.16787	0.46143	0.534741	0.659398	NoDiff	P1PD	P2POD			0	0	0	0	0	1	1	0	0
LOC_Os02g45840		0	0	1.97555	0	0	0	1.51931	0	0		NoDiff	CPOD			0	0	0	0	0	0	1	0	1
LOC_Os02g46000		0	0.12446	0	0	0	0	0	0	0	NoDiff	NoDiff	P2ND			0	1	0	0	0	0	0	0	0
LOC_Os02g46020		0.080603	0	0	0	0.170568	0.1257	0.946387	0.158549	0.128802	P1ND	NoDiff	NoDiff			0	1	0	0	0	0	0	0	0
LOC_Os02g46210		2.98251	7.83568	5.33777	3.00543	10.0416	5.39051	5.00199	9.31592	8.61147		P2MP	P2MP			0	0	0	2	0	0	0	0	0
LOC_Os02g46220		12.6624	12.3681	8.79972	8.86047	14.4793	10.6134	13.0765	16.9375	15.3842	NoDiff		P1NOD			1	0	0	0	0	0	0	0	0
LOC_Os02g46620		9.77119	12.6536	5.43226	5.7561	9.07324	8.31783	4.56403	8.85897	9.57682		NoDiff	P2NOD			1	0	0	0	0	0	0	0	0
LOC_Os02g46650		45.882	29.2144	50.0182	41.5178	26.6041	37.1798	30.1202	33.7644	31.0087	NoDiff		P1PD			0	0	0	0	0	1	0	0	0
LOC_Os02g46710		21.351	8.89819	14.8695	8.66213	7.20931	25.9845	19.9237	0	22.9567		P1POD	NoDiff			0	0	0	0	0	0	1	0	0
LOC_Os02g46720		15.6685	18.7076	18.8645	11.4149	2.5301	20.127	13.9143	14.1404	16.5094	NoDiff	P1POD	NoDiff			0	0	0	0	0	0	1	0	0
LOC_Os02g46740		0	0	0	0	0	0	0	0	0.087241	CPOD	NoDiff	NoDiff			0	0	0	0	0	0	1	0	1
LOC_Os02g47090		0	0	0	0	0	0	0.052967	0	0.126153	P1PD	NoDiff	NoDiff			0	0	0	0	0	1	0	0	0
LOC_Os02g47110		5.44911	4.22107	4.82605	2.29162	6.86306	5.56616	2.58137	9.72026	6.08941	P2MP		NoDiff			0	0	0	1	0	0	0	0	0
LOC_Os02g47140		361.838	236.753	187.265	238.135	280.452	331.212	348.281	347.799	340.138	NoDiff	NoDiff	P1ND			0	1	0	0	0	0	0	0	0
LOC_Os02g47160		3.52709	2.40705	0.508148	2.27921	2.37179	2.9738	4.17604	2.77159	2.50476	NoDiff	NoDiff	P1NOD			1	0	0	0	0	0	0	0	0
LOC_Os02g47190	1	0	0	0	0	0	0.181108	0	0	0	NoDiff	CPOD	NoDiff			0	0	0	0	0	0	1	0	1
LOC_Os02g47340		0	0.108972	0	0	0.047195	0.081154	0	0.169425	0	P2ND					0	1	0	0	0	0	0	0	0
LOC_Os02g47410		46.469	60.438	75.8275	50.1197	55.8996	64.9935	60.3284	40.7431	41.5222			P2POD			0	0	0	0	0	0	1	0	0
LOC_Os02g47420		76.5071	76.4026	121.705	68.0412	55.2927	118.307	70.1944	75.5136	57.9009	NoDiff	P1POD	P1POD			0	0	0	0	0	0	2	0	0
LOC_Os02g47500		3.35432	1.52451	0	1.18838	0.856898	1.3538	0.824658	0.800349	1.11803	NoDiff	NoDiff	CNOD			1	0	0	0	0	0	0	1	0
LOC_Os02g47680		20.0689	20.026	33.5465	42.977	21.8679	61.1482	21.3844	5.83592	14.6122	NoDiff	P1POD	P1POD			0	0	0	0	0	0	2	0	0
LOC_Os02g47770		40.8079	30.8149	18.6027	22.7624	24.8193	31.9269	31.145	58.1618	37.2994		NoDiff	P1ND			0	1	0	0	0	0	0	0	0
LOC_Os02g47830		183.552	141.82	120.362	136.28	122.549	129.924	139.142	112.744	113.317	NoDiff	NoDiff	P1ND			0	1	0	0	0	0	0	0	0
LOC_Os02g47920		0.475139	0	0	0	0	0.143563	0	0	0	NoDiff	NoDiff	P1ND			0	1	0	0	0	0	0	0	0
LOC_Os02g48094		3.84288	2.4741	0	1.36493	2.41195	2.21883	2.55575	3.12393	2.51242	NoDiff	NoDiff	P1ND			0	1	0	0	0	0	0	0	0
LOC_Os02g48100		27.5468	21.4351	32.6889	21.9575	28.8259	39.7099	33.1706	22.6095	24.3557	NoDiff	P2POD				0	0	0	0	0	0	1	0	0
LOC_Os02g48184		23.5395	19.2476	14.2213	15.6474	19.9072	18.9152	23.2508	26.4181	24.8051	NoDiff	NoDiff	P1ND			0	1	0	0	0	0	0	0	0
LOC_Os02g48280		0	0	0	0	0	0	0	0	0.124537	CPOD	NoDiff	NoDiff			0	0	0	0	0	0	1	0	1
LOC_Os02g48290		113.004	69.6256	64.6152	80.3028	73.9575	79.4695	93.3626	98.1351	93.2349	NoDiff	NoDiff	P1ND			0	1	0	0	0	0	0	0	0
LOC_Os02g48340		27.1488	17.081	3.36287	16.1036	14.1515	14.0052	15.1868	17.8481	16.8309	NoDiff	NoDiff	P1NOD			1	0	0	0	0	0	0	0	0
LOC_Os02g48360		24.9392	31.8303	20.3304	29.0355	49.2559	22.0913	25.0214	13.6486	39.6482	P1PD	P2ND	NoDiff			0	1	0	0	0	1	0	0	0
LOC_Os02g48390		102.356	56.9774	40.1393	69.2862	46.2657	76.9383	45.7982	38.338	50.7507	NoDiff	NoDiff	P1ND			0	1	0	0	0	0	0	0	0
LOC_Os02g48480		54.1347	36.8859	25.5749	36.001	34.538	37.0543	43.6296	36.0738	37.8885	NoDiff	NoDiff	P1ND			0	1	0	0	0	0	0	0	0
LOC_Os02g48530		0	0	0.180985	0.087164	0	0	0	0	0	NoDiff	NoDiff	CPOD			0	0	0	0	0	0	1	0	1
LOC_Os02g48600		73.3276	49.9939	61.0441	56.3238	44.3612	52.1625	48.7565	34.1908	42.8389	P1MP		P1MP			0	0	0	2	0	0	0	0	0
LOC_Os02g48710		9.46499	16.172	7.23107	8.82033	17.3039	12.2226	8.49064	6.55003	9.85192	NoDiff		P2ND			0	1	0	0	0	0	0	0	0
LOC_Os02g48720		570.914	429.655	507.369	389.961	510.303	614.412	557.759	325.855	535.568		P2PD	NoDiff			0	0	0	0	0	1	0	0	0
LOC_Os02g48910		0.527212	0.654073	0	0.427165	0	0.612361	0.479003	0.232442	0			CNOD			1	0	0	0	0	0	0	1	0
LOC_Os02g49010		0.148297	1.0303	0.255726	0.123159	0.483067	0.651435	0.606316	0.515881	0.577631	NoDiff	P2PD	P2ND			0	1	0	0	0	1	0	0	0
LOC_Os02g49040		0	0	0	0.136173	0.14096	0.346269	0	0	0.28385	CPOD	NoDiff	NoDiff			0	0	0	0	0	0	1	0	1
LOC_Os02g49130		1.05438	0	1.9	1.7147	2.30915	1.35675	3.09315	5.33326	3.8856		NoDiff	P1PD			0	0	0	0	0	1	0	0	0
LOC_Os02g49150		61.4559	39.4288	80.4636	17.404	33.2974	30.6272	25.6036	27.5921	1.73757	P2NOD	NoDiff	P1POD			1	0	0	0	0	0	1	0	0
LOC_Os02g49230		10.7654	12.3033	16.7523	18.8944	12.7332	9.97291	16.6204	10.7361	18.3193		P1ND	P2PD	DTH2		0	1	0	0	0	1	0	0	0
LOC_Os02g49326		1.92971	1.60799	0.232814	1.11989	0.609354	1.31961	0	0.714298	0.356102	NoDiff	NoDiff	P1NOD			1	0	0	0	0	0	0	0	0
LOC_Os02g49332		19.2967	19.1149	26.1712	16.1516	16.6957	16.679	18.3296	18.1867	11.3221	P1NOD	NoDiff	P1POD			1	0	0	0	0	0	1	0	0
LOC_Os02g49360		113.273	66.6929	57.2254	64.4086	54.2791	62.0939	69.7402	51.4803	58.9044	NoDiff	NoDiff	P1ND			0	1	0	0	0	0	0	0	0
LOC_Os02g49370		0	0.221343	0	0	0.826814	0.027473	1.41837	5.21125	2.83121	P2NPD	P2ND	P2ND	OsHAP3E		0	2	1	0	0	0	0	0	0
LOC_Os02g49460		18.4426	15.1847	19.562	12.5798	14.238	15.0983	15.2617	15.4893	18.4608	P2POD	NoDiff				0	0	0	0	0	0	1	0	0
LOC_Os02g49550		3.9501	3.45002	2.65653	2.42621	2.71668	3.0601	2.261	4.5977	5.29961	P2PD	NoDiff	NoDiff			0	0	0	0	0	1	0	0	0
LOC_Os02g49600		51.7921	31.8656	30.881	34.1062	25.3677	34.4051	24.8357	22.2026	22.3469	NoDiff		P1ND			0	1	0	0	0	0	0	0	0
LOC_Os02g49690		1.27363	0	0.396794	1.31054	0	0.969546	2.24086	0.507248	0.745488	P1ND		P1MP			0	1	0	1	0	0	0	0	0
LOC_Os02g49710		0	0	0.134924	0	0	0	0	0	0	NoDiff	NoDiff	CPOD			0	0	0	0	0	0	1	0	1
LOC_Os02g49720		36.7461	56.5295	5.39144	4.31771	22.3557	19.2836	3.1366	13.7446	7.68761	NoDiff	NoDiff	P2NOD	ALDH2a; OsALDH2B5		1	0	0	0	0	0	0	0	0
LOC_Os02g49750		0	0	0	0	0	0	0.17624	0.821017	0	P2ND	NoDiff	NoDiff			0	1	0	0	0	0	0	0	0
LOC_Os02g49860		0	0.232836	0	0	0.203197	0	0	0	0	NoDiff		P2ND			0	1	0	0	0	0	0	0	0
LOC_Os02g49950		76.6007	72.6092	90.8442	63.6793	76.3887	70.1226	66.6101	65.2777	71.2393	NoDiff	NoDiff	P1POD			0	0	0	0	0	0	1	0	0
LOC_Os02g49960		13.8439	15.2642	6.76676	14.5213	8.95063	10.4348	9.81454	10.0364	14.5278	NoDiff	NoDiff	P2NOD			1	0	0	0	0	0	0	0	0
LOC_Os02g50050		71.9291	40.5405	24.0499	32.6061	34.0142	44.3264	65.9005	79.0563	82.1335		NoDiff	P1NOD			1	0	0	0	0	0	0	0	0
LOC_Os02g50100		44.7747	32.2882	47.4725	30.3932	24.3824	33.744	32.2732	22.4391	31.054			P1PD			0	0	0	0	0	1	0	0	0
LOC_Os02g50300		0	0	0.358915	0.153649	0.27266	0	0.264146	0.838996	0.171579	P2ND	NoDiff	CPOD			0	1	0	0	0	0	1	0	1
LOC_Os02g50310	1	0	8.38176	4.71934	0	8.70553	5.39939	0	4.30022	3.79752		P2MP	P2MP			0	0	0	2	0	0	0	0	0
LOC_Os02g50320		63.6024	50.9938	78.2376	37.0288	48.3668	65.9929	49.7957	40.8127	54.1812	NoDiff	P2POD	P1PD			0	0	0	0	0	1	1	0	0
LOC_Os02g50404		0	0	0.160558	0.154653	0	0.157305	0.084595	0	0.402966	P1POD	NoDiff	NoDiff			0	0	0	0	0	0	1	0	0
LOC_Os02g50420		0	0	0	0	0	0	0	0.41198	0	P2ND	NoDiff	NoDiff			0	1	0	0	0	0	0	0	0
LOC_Os02g50460		0	0	0.069207	0.033331	0	0	0	0	0	NoDiff	NoDiff	CPOD			0	0	0	0	0	0	1	0	1
LOC_Os02g50470		0.285112	0	0	0	0	0.144506	0	0	0	NoDiff	CPOD	P1ND			0	1	0	0	0	0	1	0	1
LOC_Os02g50670		1.05978	0.175307	0.152293	0.953482	0.075924	0.82063	0.561678	0.311496	0.305774	NoDiff		P1ND			0	1	0	0	0	0	0	0	0
LOC_Os02g50680		28.7948	13.0124	28.752	18.6935	13.1993	22.0974	10.6568	8.20953	11.3705	NoDiff		P1PD			0	0	0	0	0	1	0	0	0
LOC_Os02g50700		5.67237	9.20187	10.7436	5.44912	7.79744	7.53614	6.53259	5.42353	10.4939	P1PD	NoDiff				0	0	0	0	0	1	0	0	0
LOC_Os02g50710		0.350413	1.623	0.805674	0.291014	2.87019	0.888013	0.212247	2.67787	1.31433	P2MP		NoDiff			0	0	0	1	0	0	0	0	0
LOC_Os02g50760		42.2625	20.8092	46.0006	15.8596	29.2313	16.8259	13.1737	12.8687	15.4221	NoDiff		P1PD			0	0	0	0	0	1	0	0	0
LOC_Os02g50799		2.60871	1.97366	1.41554	3.77551	5.7987	2.06671	1.83971	2.46026	10.6492	P2POD	P2ND	NoDiff			0	1	0	0	0	0	1	0	0
LOC_Os02g50820		117.001	94.2924	71.0396	98.0843	64.209	65.8486	63.3604	45.0104	65.574	NoDiff		P1ND			0	1	0	0	0	0	0	0	0
LOC_Os02g50990		11.5384	16.1021	24.4192	13.334	16.4143	15.0832	8.08904	20.1193	15.5804	NoDiff	NoDiff	P2PD			0	0	0	0	0	1	0	0	0
LOC_Os02g51110		2.49356	0.682722	1.49408	1.78654	6.36471	3.0695	3.30028	9.90053	9.97508	P2PD	P2NPD	P1MP	Lsi1; OsNIP2;1		0	0	1	1	0	1	0	0	0
LOC_Os02g51320	1	120.016	71.717	69.5821	82.6981	91.0576	124.21	167.516	130.054	158.883		P2POD	P1ND	PGL2		0	1	0	0	0	0	1	0	0
LOC_Os02g51410		23.831	13.6733	17.6625	31.332	32.2953	9.97665	15.1724	6.43685	16.3737		P2NOD	NoDiff			1	0	0	0	0	0	0	0	0
LOC_Os02g51450		9.31409	7.11701	2.8247	4.93885	5.75585	6.0912	7.21312	6.33485	5.49345	NoDiff	NoDiff	P1NOD			1	0	0	0	0	0	0	0	0
LOC_Os02g51460		44.8901	29.12	43.222	33.8694	32.1566	46.2303	29.8615	27.3142	32.8696	NoDiff	P1PD				0	0	0	0	0	1	0	0	0
LOC_Os02g51490		20.6368	16.3481	14.5326	15.2454	14.7219	18.3908	14.6344	14.2164	14.5092	NoDiff		P1ND			0	1	0	0	0	0	0	0	0
LOC_Os02g51550		1.40085	0.878117	0.381419	0	1.64799	1.49475	4.01924	0	4.50477	P1PD	NoDiff	NoDiff			0	0	0	0	0	1	0	0	0
LOC_Os02g51570		1.03486	1.10013	0.647113	0	0.963727	1.55684	1.04119	0.977401	1.91888	P1POD	P2PD	NoDiff			0	0	0	0	0	1	1	0	0
LOC_Os02g51590		30.5178	15.371	26.1618	32.9673	22.8371	27.5385	23.4745	20.586	30.6512	P1PD	NoDiff				0	0	0	0	0	1	0	0	0
LOC_Os02g51600		0	0	0	0	0.108803	0	0	0	0.118832	CPOD	P2ND	NoDiff			0	1	0	0	0	0	1	0	1
LOC_Os02g51660		27.9202	29.9037	42.1007	27.4924	42.5892	49.4126	22.1229	20.8943	25.5817	NoDiff	P2PD	P2POD			0	0	0	0	0	1	1	0	0
LOC_Os02g51820		6.85337	4.96166	0	5.65122	0.093464	0.215066	0.281607	4.47506	0.389997	NoDiff		CNOD			1	0	0	0	0	0	0	1	0
LOC_Os02g51860		23.7997	23.529	24.3084	20.4408	23.5706	25.341	21.2855	24.7659	27.6832	P2PD		NoDiff			0	0	0	0	0	1	0	0	0
LOC_Os02g51910		0.33984	0.963694	0.498876	0.44351	1.7523	1.26278	0.904242	3.03945	1.972	P2MP		NoDiff			0	0	0	1	0	0	0	0	0
LOC_Os02g52090		0.293786	1.01293	0.95659	0.170791	0.712109	0.987821	0.413731	0.56992	0.712024	NoDiff	P2PD				0	0	0	0	0	1	0	0	0
LOC_Os02g52130		27.5207	42.7642	29.2598	38.9064	34.533	53.8647	52.3343	40.6596	42.8218	NoDiff	P1PD	NoDiff			0	0	0	0	0	1	0	0	0
LOC_Os02g52280		69.7784	45.5977	87.5036	82.863	57.9632	76.6138	55.2526	52.0726	59.8013	NoDiff	NoDiff	P1PD			0	0	0	0	0	1	0	0	0
LOC_Os02g52290		159.877	105.739	89.8975	101.662	94.0327	104.42	126.94	127.16	138.986	NoDiff	NoDiff	P1ND			0	1	0	0	0	0	0	0	0
LOC_Os02g52370		12.4055	10.468	17.2143	14.1268	10.0849	10.4144	15.8928	12.5009	12.4024	NoDiff	NoDiff	P1PD			0	0	0	0	0	1	0	0	0
LOC_Os02g52430		51.3977	26.0119	30.0008	41.3571	38.8136	5.29955	59.6329	43.6042	60.5174		P1NOD				1	0	0	0	0	0	0	0	0
LOC_Os02g52450		0.064692	0.256825	0	0.053726	0.111229	0.054647	0.029388	0.057043	0.027997	NoDiff	NoDiff	P2ND			0	1	0	0	0	0	0	0	0
LOC_Os02g52480		0.463341	0.715349	0	0	0.265552	0.130466	0	0	0	NoDiff	NoDiff	CNOD	KRP1		1	0	0	0	0	0	0	1	0
LOC_Os02g52550		22.3881	14.543	4.9074	13.2318	8.41181	4.84724	12.8406	9.91516	5.83294	NoDiff		P1NOD			1	0	0	0	0	0	0	0	0
LOC_Os02g52630		0.437812	0	0.109596	0.448652	0.491745	0.456346	0.40421	0.896673	0.385087	P2ND	NoDiff				0	1	0	0	0	0	0	0	0
LOC_Os02g52690		0.117245	0.279279	0.561695	0.029211	0.361727	0.316165	0.063915	0.330828	0.303884	NoDiff		P2POD			0	0	0	0	0	0	1	0	0
LOC_Os02g52730		2.29398	5.54561	1.31191	0.706888	5.99784	5.59295	1.4702	7.30466	3.83273	P2MP		P2ND			0	1	0	1	0	0	0	0	0
LOC_Os02g52810		109.527	84.7604	110.895	97.2771	72.2989	127.36	94.3086	83.1249	95.6648	NoDiff	P1POD	NoDiff			0	0	0	0	0	0	1	0	0
LOC_Os02g52870		0.338924	0.276247	0	0.077051	0	0	0	0	0	NoDiff	NoDiff	CNOD			1	0	0	0	0	0	0	1	0
LOC_Os02g52934		0	0.552069	0	0	0.387622	0	0	0	0	NoDiff		P2ND			0	1	0	0	0	0	0	0	0
LOC_Os02g53030		0.451125	0	0.424828	0.385452	0	0	0.177305	0	0.631299	P1POD	NoDiff				0	0	0	0	0	0	1	0	0
LOC_Os02g53090		0	0	0	0	0	0.156368	0	0	0.375596	CPOD	CPOD	NoDiff			0	0	0	0	0	0	2	0	2
LOC_Os02g53180		9.2952	10.5144	8.71987	11.0782	18.8108	10.57	15.4162	20.3896	20.3385		P2ND	NoDiff	OsACO3		0	1	0	0	0	0	0	0	0
LOC_Os02g53360		14.319	11.2053	14.3639	6.86018	8.37743	11.1966	4.65643	6.59698	7.35605	NoDiff	P2PD				0	0	0	0	0	1	0	0	0
LOC_Os02g53520		82.152	47.5957	63.5049	70.3262	83.4955	52.8525	60.1278	41.8093	44.6918		P2NOD	P1MP			1	0	0	1	0	0	0	0	0
LOC_Os02g53640		7.63457	6.20485	4.06332	5.67507	6.06851	8.36003	5.0443	5.83716	5.24653	NoDiff	P2PD	P1ND			0	1	0	0	0	1	0	0	0
LOC_Os02g53660		0.452615	0.673833	0.195123	0.281919	0.194554	0.238961	0.051404	0.299329	0	NoDiff	NoDiff	P2ND			0	1	0	0	0	0	0	0	0
LOC_Os02g53690		78.2578	38.5683	55.9973	50.4618	50.8995	75.5363	65.0547	53.211	61.6663	NoDiff	P2POD	P1MP	OsGRF1; rhd1		0	0	0	1	0	0	1	0	0
LOC_Os02g53740		23.3164	18.7081	27.3147	17.2598	13.1316	17.0256	12.8209	11.5775	13.7884	NoDiff	NoDiff	P1PD			0	0	0	0	0	1	0	0	0
LOC_Os02g53780		15.2248	13.1215	14.4344	11.1559	10.5378	3.27611	11.433	9.44623	11.7869	NoDiff	P1NOD	NoDiff			1	0	0	0	0	0	0	0	0
LOC_Os02g53830		22.962	17.386	14.8261	20.5898	18.479	24.1734	27.1423	23.4805	23.6499	NoDiff		P1ND			0	1	0	0	0	0	0	0	0
LOC_Os02g53835		27.335	37.313	24.8622	22.928	38.3498	34.9321	35.4873	52.7572	42.0626	P2MP		P2ND			0	1	0	1	0	0	0	0	0
LOC_Os02g53870		0	0	0	0	0.076441	0.075111	0	0	0.15393	CPOD		NoDiff			0	0	0	0	0	0	1	0	1
LOC_Os02g53990		12.1579	8.73885	14.271	9.94113	7.16194	10.7373	9.33085	6.78292	8.78489	NoDiff		P1PD			0	0	0	0	0	1	0	0	0
LOC_Os02g54080		11.1153	53.9937	47.0144	38.8759	43.5121	7.33044	7.50316	37.3259	8.95455		P2NOD				1	0	0	0	0	0	0	0	0
LOC_Os02g54120		26.1735	24.6047	16.8186	25.6984	18.7348	17.397	20.1702	16.6339	22.1482	NoDiff	NoDiff	P1ND			0	1	0	0	0	0	0	0	0
LOC_Os02g54130		13.0243	41.1407	45.9238	30.8313	34.0963	11.2283	23.3518	10.8941	24.6779	NoDiff	P2ND				0	1	0	0	0	0	0	0	0
LOC_Os02g54280		10.9338	8.62392	14.3953	8.341	6.07326	10.2497	7.57663	5.78314	6.93504	NoDiff		P1PD			0	0	0	0	0	1	0	0	0
LOC_Os02g54300		1.24825	0.176984	0.768751	1.2588	1.07311	1.88293	0.357785	1.5724	2.88765	P2PD	NoDiff	NoDiff			0	0	0	0	0	1	0	0	0
LOC_Os02g54570		0	0	0.209294	0	0	0	0	0	0	NoDiff	NoDiff	CPOD			0	0	0	0	0	0	1	0	1
LOC_Os02g54690		0	0	0	0	0	0.253135	0	0	0	NoDiff	CPOD	NoDiff			0	0	0	0	0	0	1	0	1
LOC_Os02g54770		69.5108	43.5496	75.6545	60.2132	54.5272	71.6375	60.2479	66.1934	67.1394	NoDiff	NoDiff	P1PD			0	0	0	0	0	1	0	0	0
LOC_Os02g54780		21.4217	32.656	28.0784	23.257	35.5844	26.4072	19.1335	32.6367	32.2715	P2PD		P2MP			0	0	0	1	0	1	0	0	0
LOC_Os02g54920		0.744875	0	0	0	0.106727	0.524351	0	0.656814	0.214915		P2POD	P1ND			0	1	0	0	0	0	1	0	0
LOC_Os02g55290		0.139864	0	0	0	0	0	0.084717	0	0.121062	P1PD	NoDiff	P1ND			0	1	0	0	0	1	0	0	0
LOC_Os02g55370		1073.74	678.829	478.444	691.558	474.206	493.216	617.112	482.143	628.104	NoDiff	NoDiff	P1ND			0	1	0	0	0	0	0	0	0
LOC_Os02g55420		41.9483	30.5936	62.3065	52.2887	55.32	59.7447	33.9818	38.6063	34.1335	NoDiff	NoDiff	P1POD			0	0	0	0	0	0	1	0	0
LOC_Os02g55530		5.0455	7.6689	0	0	0	4.86334	1.78907	2.38733	1.84355	NoDiff	CPOD	CNOD			1	0	0	0	0	0	1	1	1
LOC_Os02g55560		6.24091	25.2828	25.0007	4.92683	20.3963	4.72297	17.8743	17.5821	17.2696	NoDiff	P2ND	P2PD			0	1	0	0	0	1	0	0	0
LOC_Os02g55689		17.7559	15.4637	19.0127	15.0442	13.0434	18.0483	13.6484	11.2829	15.6571		P1PD	NoDiff			0	0	0	0	0	1	0	0	0
LOC_Os02g55830	1	0.272055	10.0535	4.86264	0	8.9167	5.70206	0.141244	7.20364	4.27128	P2MP	P2MP	P2MP			0	0	0	3	0	0	0	0	0
LOC_Os02g55970		0	6.06862	0	0	6.57066	6.28793	0	0	8.14971	CPOD	P2PD	P2ND			0	1	0	0	0	1	1	0	1
LOC_Os02g56020		24.2354	18.1766	13.8422	14.822	18.0666	18.9607	15.396	22.1195	17.7149	NoDiff	NoDiff	P1ND			0	1	0	0	0	0	0	0	0
LOC_Os02g56050		9.30012	5.60808	6.55777	6.26743	6.21505	10.1791	6.04835	10.0514	6.13979		P1POD				0	0	0	0	0	0	1	0	0
LOC_Os02g56060		0.344795	0.837386	0.929525	0.282223	0.362664	0.801166	0.437396	0.690425	0.749751	NoDiff	P2PD				0	0	0	0	0	1	0	0	0
LOC_Os02g56120		3.68249	0.226777	0	0.378925	0.540182	0.144759	0	0	0.343284	NoDiff	NoDiff	P1ND	iaa9		0	1	0	0	0	0	0	0	0
LOC_Os02g56210		93.9988	81.5263	85.6282	46.9913	51.6855	95.9421	42.8627	39.7748	46.2238	NoDiff	P2POD	NoDiff			0	0	0	0	0	0	1	0	0
LOC_Os02g56310		21.9512	15.7872	12.3087	15.9442	14.0979	14.5932	18.3393	15.9739	15.9195	NoDiff	NoDiff	P1ND			0	1	0	0	0	0	0	0	0
LOC_Os02g56460		0.677511	0	0	0	0.232979	0	0	0	0	NoDiff		P1ND	OsCCR1		0	1	0	0	0	0	0	0	0
LOC_Os02g56480		46.4332	38.7917	25.3412	24.0363	39.6659	38.629	39.7342	57.4195	46.8688	NoDiff		P1NOD			1	0	0	0	0	0	0	0	0
LOC_Os02g56500		1.35708	1.16774	2.32476	1.21597	3.60124	3.13187	2.22703	6.26032	7.90134	P2POD		P1PD			0	0	0	0	0	1	1	0	0
LOC_Os02g56520		131.246	77.577	112.241	116.785	57.826	89.8662	91.9284	54.2859	79.9625		P1MP				0	0	0	1	0	0	0	0	0
LOC_Os02g56650		3.95676	5.67247	3.89985	3.95542	4.50394	6.7467	3.36194	5.4098	4.74091	NoDiff	P2POD	NoDiff			0	0	0	0	0	0	1	0	0
LOC_Os02g56760		0	0	0	0	0.570586	0	0	0	0	NoDiff	P2ND	NoDiff			0	1	0	0	0	0	0	0	0
LOC_Os02g56930		1.37034	0	0.738445	1.35143	2.06161	1.51931	1.78973	1.05729	0	CNOD	NoDiff	NoDiff			1	0	0	0	0	0	0	1	0
LOC_Os02g56980		11.3338	7.64641	9.84852	6.68404	7.74596	11.4785	6.28836	3.80487	7.46658		P2POD	NoDiff			0	0	0	0	0	0	1	0	0
LOC_Os02g56990		68.9323	78.0428	52.6781	50.3959	99.5017	80.9004	46.3891	72.2904	56.0777	NoDiff		P2ND			0	1	0	0	0	0	0	0	0
LOC_Os02g57100		33.8922	32.8828	17.9135	19.6283	22.2382	17.4559	23.1576	19.0827	21.5658	NoDiff	NoDiff	P1NOD			1	0	0	0	0	0	0	0	0
LOC_Os02g57110		0.156299	0.155127	0.134762	0.032451	0.201553	0.198046	0.451167	0.344552	0.202933	P1ND	NoDiff	NoDiff			0	1	0	0	0	0	0	0	0
LOC_Os02g57140		76.4413	109.592	150.078	111.098	101.754	111.393	103.87	100.586	105.804	NoDiff	NoDiff	P2POD			0	0	0	0	0	0	1	0	0
LOC_Os02g57180		25.701	55.814	14.6965	74.2996	54.3902	51.8931	13.708	41.8185	58.8603	P2PD	NoDiff	P2ND			0	1	0	0	0	1	0	0	0
LOC_Os02g57240		129.137	80.5657	63.8655	71.4985	67.8872	55.649	49.4481	52.5085	71.7178	NoDiff	NoDiff	P1ND			0	1	0	0	0	0	0	0	0
LOC_Os02g57250		124.544	116.932	56.5998	108.171	35.0729	108.042	79.0603	90.099	83.6502	NoDiff		P1NOD	iaa10		1	0	0	0	0	0	0	0	0
LOC_Os02g57260		12.2187	11.8955	15.328	11.7069	11.8264	18.5354	10.4623	7.56228	10.2959	NoDiff	P2POD	NoDiff			0	0	0	0	0	0	1	0	0
LOC_Os02g57300		0	2.97619	0	0	0	1.49817	0	1.31701	0.800215	NoDiff	CPOD	P2ND			0	1	0	0	0	0	1	0	1
LOC_Os02g57350		2.08137	2.36087	0	0	1.68708	1.80843	0.810448	1.98599	1.85305	NoDiff		CNOD			1	0	0	0	0	0	0	1	0
LOC_Os02g57400		72.7134	51.7288	68.9745	69.1613	71.544	85.5688	70.1709	69.8248	77.7143	NoDiff	P2POD				0	0	0	0	0	0	1	0	0
LOC_Os02g57430		36.672	16.8031	26.1813	32.3108	23.0592	31.3128	23.4505	14.5392	21.7466	NoDiff	NoDiff	P1MP			0	0	0	1	0	0	0	0	0
LOC_Os02g57480		8.44824	7.70169	4.80213	6.91223	6.5347	6.74003	6.65229	7.44946	5.9584	NoDiff	NoDiff	P1NOD			1	0	0	0	0	0	0	0	0
LOC_Os02g57530		13.0657	24.3576	24.0951	10.563	10.0349	12.5972	22.1458	33.9294	11.4352	P2ND	NoDiff	NoDiff			0	1	0	0	0	0	0	0	0
LOC_Os02g57540		288.803	173.933	154.097	196.152	153.121	244.29	237.65	164.817	200.122	NoDiff	P1PD	P1ND			0	1	0	0	0	1	0	0	0
LOC_Os02g57590		106.554	98.0828	23.6659	36.9079	58.5037	117.403	96.6574	95.0781	116.657	NoDiff	P2PD	P1NOD			1	0	0	0	0	1	0	0	0
LOC_Os02g57600		74.7915	10.0959	13.5068	77.3829	9.30242	89.1406	13.4541	60.9837	15.419		P1PD				0	0	0	0	0	1	0	0	0
LOC_Os02g57630		86.0994	61.1543	75.8594	91.1345	49.2346	5.55566	66.6839	46.9581	63.2495	NoDiff	P1NOD	NoDiff			1	0	0	0	0	0	0	0	0
LOC_Os02g57690		10.0909	12.0476	16.9432	11.4119	5.85575	13.2874	10.4652	8.99456	12.5998	NoDiff		P2PD			0	0	0	0	0	1	0	0	0
LOC_Os02g57710		27.9064	25.0734	21.2811	38.5306	25.848	26.8022	20.8436	18.1332	28.8902	P1POD					0	0	0	0	0	0	1	0	0
LOC_Os02g57770		0.956137	2.32092	0	0.220572	1.91795	1.0579	1.35132	4.40285	2.62075	P2MP	P2MP	CNOD			1	0	0	2	0	0	0	1	0
LOC_Os02g57780		39.0905	31.283	39.4678	35.8061	26.8853	28.9565	29.8684	28.7098	35.1846	P1PD					0	0	0	0	0	1	0	0	0
LOC_Os02g57810		0.197381	0.081062	0.063084	0.06783	0.125071	0.45277	0.630755	0.571652	0.318131	P1NOD	P2POD	NoDiff			1	0	0	0	0	0	1	0	0
LOC_Os02g57830		178.986	162.9	141.345	137.277	147.403	12.3698	176.489	148.656	153.113	NoDiff	P2NOD	NoDiff			1	0	0	0	0	0	0	0	0
LOC_Os02g57940		0.49564	0.12298	0.320508	0.360171	0.186417	0.314012	0.309594	0.163891	0.884839	P1POD	NoDiff	NoDiff			0	0	0	0	0	0	1	0	0
LOC_Os02g57960		0	0	0	0	0.108314	0	3.7514	0	0	P1ND		NoDiff			0	1	0	0	0	0	0	0	0
LOC_Os02g58020		63.3133	37.5716	64.6909	80.474	55.2802	59.5748	46.382	40.4627	58.2956	P1PD		P1PD			0	0	0	0	0	2	0	0	0
LOC_Os02g58120		15.8745	9.51638	7.48355	18.0195	12.4487	17.6301	9.58804	11.1708	20.1182	P2PD	NoDiff	NoDiff			0	0	0	0	0	1	0	0	0
LOC_Os02g58139		10.2362	8.90659	5.87575	9.40419	8.89522	8.91938	10.7661	8.93617	2.85912	P1NOD	NoDiff	NoDiff			1	0	0	0	0	0	0	0	0
LOC_Os02g58210		53.1764	19.2295	63.9715	72.0428	42.509	60.7812	65.8728	58.9474	75.0936	NoDiff	NoDiff	P1PD			0	0	0	0	0	1	0	0	0
LOC_Os02g58220		34.9084	16.9553	16.2321	21.9344	15.9867	20.0044	19.0137	18.4552	15.8826	NoDiff	NoDiff	P1ND	OsRPA2		0	1	0	0	0	0	0	0	0
LOC_Os02g58280		12.1156	4.90933	17.0781	6.52661	7.54441	12.3662	7.94013	8.94599	6.53184	NoDiff	NoDiff	P1PD			0	0	0	0	0	1	0	0	0
LOC_Os02g58340		17.4592	13.7784	30.8756	28.6732	14.2616	29.5532	18.7387	14.7027	14.7039	NoDiff		P1POD			0	0	0	0	0	0	1	0	0
LOC_Os02g58450		1.10361	1.03336	0.682249	0.466922	0.823467	0.861912	0.921131	2.01981	0.811081	P2ND	NoDiff	NoDiff			0	1	0	0	0	0	0	0	0
LOC_Os02g58460		35.9616	21.7911	26.5621	20.2718	19.5874	27.6362	27.4483	29.2431	28.0134	NoDiff	P1POD				0	0	0	0	0	0	1	0	0
LOC_Os02g58470		39.3018	23.9119	35.4406	35.2272	25.5878	37.0246	25.4367	24.8515	41.0045	P1POD					0	0	0	0	0	0	1	0	0
LOC_Os02g58540		1.88808	2.50169	1.43257	1.89601	1.55824	2.29669	3.12781	3.388	4.89874	P2POD	NoDiff	NoDiff			0	0	0	0	0	0	1	0	0
LOC_Os02g58670	1	23.2736	29.8783	23.1428	17.8792	43.9967	29.2516	18.7478	35.9908	17.8889	P2ND	P2MP	NoDiff			0	1	0	1	0	0	0	0	0
LOC_Os02g58690		0	0	0	0	0	0	0.415777	0	0	P1ND	NoDiff	NoDiff			0	1	0	0	0	0	0	0	0
LOC_Os02g58710		0.923216	1.35473	1.55624	1.28399	1.31855	2.07216	1.44851	1.19081	1.48404	NoDiff	P2POD				0	0	0	0	0	0	1	0	0
LOC_Os02g58730		267.013	122.409	65.6594	133.952	129.815	149.143	74.668	68.8045	76.9726	NoDiff	NoDiff	P1NOD	OsRacD		1	0	0	0	0	0	0	0	0
LOC_Os02g58790		0.131228	0.868296	0	0.108983	0.564076	0.550758	0.079486	0	0.340763	NoDiff	NoDiff	P2ND			0	1	0	0	0	0	0	0	0
LOC_Os03g01016		9.40759	6.32824	5.17272	13.3954	6.91101	4.54476	4.63302	4.68863	5.39428	NoDiff	P1ND	NoDiff			0	1	0	0	0	0	0	0	0
LOC_Os03g01040		0.350923	0.70629	1.09849	0.318756	0.479463	0.857624	0.44523	0.422162	0.550324	NoDiff	P2POD	P2POD			0	0	0	0	0	0	2	0	0
LOC_Os03g01140		9.73854	9.66434	0	0	0	5.96824	3.67893	0	2.70811	NoDiff	NoDiff	CNOD			1	0	0	0	0	0	0	1	0
LOC_Os03g01180		22.0833	16.6933	15.6317	31.6827	14.0862	16.3286	20.6548	16.8005	23.5981		P1ND				0	1	0	0	0	0	0	0	0
LOC_Os03g01190		79.2828	65.3444	61.0539	32.2961	70.5503	85.7499	85.8192	81.4816	91.7818	NoDiff	P2PD	NoDiff			0	0	0	0	0	1	0	0	0
LOC_Os03g01210		117.82	102.813	55.3528	116.193	122.089	112.702	73.2828	72.4883	82.9899	NoDiff	NoDiff	P1ND			0	1	0	0	0	0	0	0	0
LOC_Os03g01222		8.45736	4.92197	3.86879	5.84745	4.15374	4.28332	5.03798	3.91999	5.27095	NoDiff	NoDiff	P1ND			0	1	0	0	0	0	0	0	0
LOC_Os03g01250		54.4472	30.5003	39.7149	32.9669	38.3404	39.0799	42.0619	25.9287	37.7308	P1MP		P1MP			0	0	0	2	0	0	0	0	0
LOC_Os03g01270		53.2886	77.649	13.5755	31.4477	35.3608	42.9531	50.3685	70.2574	39.6346	NoDiff	NoDiff	P2NOD			1	0	0	0	0	0	0	0	0
LOC_Os03g01320		61.6616	33.4674	32.6696	35.9696	23.4575	23.2507	32.2578	18.8068	22.1226	NoDiff		P1ND	qLTG3-1		0	1	0	0	0	0	0	0	0
LOC_Os03g01350		30.0234	26.9841	38.5562	34.9807	22.743	38.4105	29.5938	17.534	29.3041		P1PD	P1PD			0	0	0	0	0	2	0	0	0
LOC_Os03g01420		0.125219	0	0.107966	0.181988	0.080737	0	0.113769	0.331247	0.406449	P2PD		NoDiff			0	0	0	0	0	1	0	0	0
LOC_Os03g01442		0.024623	14.3768	7.85509	0.040897	11.5154	9.21426	0	9.36322	6.13811	P2MP	P2PD	P2MP			0	0	0	2	0	1	0	0	0
LOC_Os03g01600		10.9436	7.09009	8.42797	8.65444	8.34724	11.8079	8.48513	8.63692	8.95204	NoDiff	P1POD	NoDiff			0	0	0	0	0	0	1	0	0
LOC_Os03g01700		0	0	0	0.139155	0.255748	0.26263	0.205435	0.140333	0.412528	P1PD	NoDiff	NoDiff	Lsi2		0	0	0	0	0	1	0	0	0
LOC_Os03g01730		22.2348	13.3844	17.0016	19.3273	11.0387	25.9327	15.0134	11.1902	14.5943		P1POD	P1MP			0	0	0	1	0	0	1	0	0
LOC_Os03g01750		6.76039	11.9711	16.7615	5.13632	14.9756	7.12006	10.9745	7.91177	9.50299	NoDiff		P2PD			0	0	0	0	0	1	0	0	0
LOC_Os03g01820		0.101997	0	0.156421	0.169416	0	0	0.322474	0.160871	0.088286	P1ND	P1ND	P1PD			0	2	0	0	0	1	0	0	0
LOC_Os03g01840		9.23447	6.23107	6.03027	12.6014	13.3651	17.1481	8.14313	18.647	29.2996	P2POD	NoDiff	NoDiff			0	0	0	0	0	0	1	0	0
LOC_Os03g01850		137.397	67.3903	9.22171	71.5353	93.182	39.7338	66.5643	18.4864	60.9638	NoDiff	NoDiff	P1NOD			1	0	0	0	0	0	0	0	0
LOC_Os03g01900		21.7086	11.529	9.0412	11.9368	16.226	16.8417	19.1366	15.7827	16.4536	NoDiff		P1ND			0	1	0	0	0	0	0	0	0
LOC_Os03g01910	1	45.6808	32.2178	2.29258	61.41	81.5531	6.72148	35.3406	31.6864	30.8219	NoDiff	P2ND	NoDiff	OsBTF3; Osj10gBTF3		0	1	0	0	0	0	0	0	0
LOC_Os03g01980		99.6749	71.9161	55.8709	84.4845	74.3129	93.7587	106.938	122.058	113.939	NoDiff	NoDiff	P1ND			0	1	0	0	0	0	0	0	0
LOC_Os03g02080		77.8542	26.941	27.0335	22.706	47.6143	23.2729	38.2986	18.497	37.7242	NoDiff		P1ND			0	1	0	0	0	0	0	0	0
LOC_Os03g02120		0.131192	0	2.21706	0.196118	0	1.92832	0.190714	0	1.45158	P1POD	P1POD	P1POD			0	0	0	0	0	0	3	0	0
LOC_Os03g02130		4.95355	2.44981	0	0	1.34392	1.61446	0	0	2.0653	CPOD	NoDiff	CNOD			1	0	0	0	0	0	1	1	1
LOC_Os03g02310		19.5762	10.8251	7.80322	11.3305	11.9102	12.9617	16.7975	15.3778	14.0163	NoDiff	NoDiff	P1ND			0	1	0	0	0	0	0	0	0
LOC_Os03g02480		17.7732	12.2936	16.1671	13.7665	12.8372	22.2207	22.1185	18.2895	21.6715	NoDiff	P1POD				0	0	0	0	0	0	1	0	0
LOC_Os03g02550		17.4128	54.3662	19.9085	24.7487	59.9547	26.6718	14.7748	36.6934	18.4719		P2ND	P2ND			0	2	0	0	0	0	0	0	0
LOC_Os03g02680		264.613	74.4861	14.6918	130.476	79.6723	149.88	128.01	164.827	96.453			P1NOD	cdc2Os-1		1	0	0	0	0	0	0	0	0
LOC_Os03g02750		61.0655	53.8311	41.2503	52.631	79.056	67.8106	65.1363	83.9491	70.9404	NoDiff		P1ND			0	1	0	0	0	0	0	0	0
LOC_Os03g02762		9.01598	7.16103	6.25549	6.1939	6.6493	7.60163	6.71925	5.58453	7.02588	NoDiff	NoDiff	P1ND			0	1	0	0	0	0	0	0	0
LOC_Os03g02820		33.2825	21.8559	16.2839	18.941	13.4795	20.5005	25.7346	15.7973	26.1163		NoDiff	P1ND			0	1	0	0	0	0	0	0	0
LOC_Os03g02939		0	0	0	0	0	0	0.199551	0	0	P1ND	NoDiff	NoDiff			0	1	0	0	0	0	0	0	0
LOC_Os03g02960		0	0	0	0	0	0	0	0	0.377259	CPOD	NoDiff	NoDiff			0	0	0	0	0	0	1	0	1
LOC_Os03g02970		40.5662	29.1294	46.708	36.3515	27.1401	41.802	33.1083	34.3151	40.0267	NoDiff	P1PD	P1PD	OsDCL1		0	0	0	0	0	2	0	0	0
LOC_Os03g03200		0.991665	2.31619	0.508284	0.779238	1.53004	0.559789	0.454348	0.958806	0.785424	NoDiff	NoDiff	P2ND			0	1	0	0	0	0	0	0	0
LOC_Os03g03260	1	0.202098	0.200584	0.087125	0.37103	0.325765	0.82319	0.757424	0.222756	0.41546	P1MP	P1POD	NoDiff			0	0	0	1	0	0	1	0	0
LOC_Os03g03350		0	0	0	0	0.411293	0.354237	0	0	4.04842	CPOD		NoDiff			0	0	0	0	0	0	1	0	1
LOC_Os03g03410		65.6738	56.2353	35.5211	53.9822	42.7228	51.3571	52.5316	39.0078	40.3711	NoDiff	NoDiff	P1ND			0	1	0	0	0	0	0	0	0
LOC_Os03g03450		0.26442	0	0	0	0.151145	0.049948	0.106756	0.104614	0	NoDiff	NoDiff	P1ND			0	1	0	0	0	0	0	0	0
LOC_Os03g03460		132.098	97.8048	157.507	108.968	87.4318	102.409	105.878	77.1757	95.301	NoDiff	NoDiff	P1POD			0	0	0	0	0	0	1	0	0
LOC_Os03g03530		8.58926	5.34353	8.87144	12.6993	7.7017	11.8617	8.5888	7.6859	13.7029	P1PD	NoDiff	NoDiff			0	0	0	0	0	1	0	0	0
LOC_Os03g03560		36.6334	26.6603	40.3765	33.3269	26.6746	32.5846	29.4006	23.6458	30.2583	NoDiff	NoDiff	P1PD			0	0	0	0	0	1	0	0	0
LOC_Os03g03600		58.2282	64.6474	33.3416	39.9664	80.0777	51.1887	52.9962	64.8069	55.5653	NoDiff		P2NOD			1	0	0	0	0	0	0	0	0
LOC_Os03g03700		0	0	0	0	0	0	0	0	0.098915	CPOD	NoDiff	NoDiff			0	0	0	0	0	0	1	0	1
LOC_Os03g03990		1.59048	1.46856	0.576765	1.33331	1.05059	1.06689	1.0704	0.647959	1.2747	NoDiff	NoDiff	P1NOD	OscpSRP43	OscpSRP43	1	0	0	0	0	0	0	0	0
LOC_Os03g04120		0.089695	0.120126	0	0.175905	0.201532	0	0.109966	0.160086	0	NoDiff	CNOD	NoDiff			1	0	0	0	0	0	0	1	0
LOC_Os03g04140		32.2761	26.6656	23.4014	29.3813	24.2978	7.54978	25.7178	18.2712	25.8691	NoDiff	P1NOD	NoDiff			1	0	0	0	0	0	0	0	0
LOC_Os03g04150		1.40902	0	3.17229	4.79481	0	2.29519	4.10738	0	2.22169	P1MP	P1MP	P1POD			0	0	0	2	0	0	1	0	0
LOC_Os03g04320		0	0	2.22103	0	0	0	0	0	0.797171	NoDiff	NoDiff	CPOD			0	0	0	0	0	0	1	0	1
LOC_Os03g04360		0.127999	0.10163	0.044144	0.148822	0.352123	0.086499	0.162812	0.270878	0.155109	NoDiff	P2ND	NoDiff	OsPht1;7; OsPT7		0	1	0	0	0	0	0	0	0
LOC_Os03g04370		25.3314	18.6101	0	8.1365	14.3905	11.0395	10.6848	0	1.54564	NoDiff	NoDiff	CNOD			1	0	0	0	0	0	0	1	0
LOC_Os03g04420		0	0	0.245934	0.022208	0.063858	0	0	0	0	NoDiff	NoDiff	CPOD			0	0	0	0	0	0	1	0	1
LOC_Os03g04590		447.521	229.129	238.572	329.33	292.076	98.7831	88.6304	318.674	329.164		P1NOD				1	0	0	0	0	0	0	0	0
LOC_Os03g04690		19.5884	14.9456	12.888	2.57487	11.2484	17.1603	16.8164	15.9249	15.5949	NoDiff	P2PD	NoDiff			0	0	0	0	0	1	0	0	0
LOC_Os03g04770		0.905231	1.0669	1.31709	0.959914	1.96986	2.21822	1.10695	1.59642	4.31859	P2POD	NoDiff	NoDiff			0	0	0	0	0	0	1	0	0
LOC_Os03g04790		0	0	0.256953	0.402515	0	0.151047	0	0.353309	0.230158		P1MP	CPOD			0	0	0	1	0	0	1	0	1
LOC_Os03g04810		0.31882	0.732594	0.38185	0.659864	0.524781	1.33501	0.983593	0.733043	1.28534	NoDiff	P1POD	NoDiff			0	0	0	0	0	0	1	0	0
LOC_Os03g04820		0	0.163353	0	0	0	0.011586	0	0	0	NoDiff	NoDiff	P2ND			0	1	0	0	0	0	0	0	0
LOC_Os03g04850		0.116491	0.346851	0.200879	0.241861	1.15168	0.295211	0.317517	0.821752	0.554573	NoDiff	P2ND	NoDiff			0	1	0	0	0	0	0	0	0
LOC_Os03g04870		0	0	0	0	0.239247	0.094034	0	1.27487	0.433592	P2MP	NoDiff	NoDiff			0	0	0	1	0	0	0	0	0
LOC_Os03g04910		0	0	0.272795	0	0	0	0.09582	0	0.091287		NoDiff	CPOD			0	0	0	0	0	0	1	0	1
LOC_Os03g04930		62.3514	65.9247	29.9433	0.11233	56.2242	0.412044	44.3537	28.6225	43.8016	NoDiff		P2NOD			1	0	0	0	0	0	0	0	0
LOC_Os03g05000		0	0	0	0	0	0.172592	0	0	0	NoDiff	CPOD	NoDiff			0	0	0	0	0	0	1	0	1
LOC_Os03g05120		0	0	0	0	0	0	0	0.268309	0	P2ND	NoDiff	NoDiff			0	1	0	0	0	0	0	0	0
LOC_Os03g05160	1	3.16203	2.81809	1.5579	2.73	1.60883	2.53072	2.22796	2.04848	2.11719	NoDiff	NoDiff	P1ND			0	1	0	0	0	0	0	0	0
LOC_Os03g05280		58.2152	60.68	42.7787	40.5725	48.4821	42.9975	32.9193	42.48	45.6922		NoDiff	P2NOD			1	0	0	0	0	0	0	0	0
LOC_Os03g05410		0	0	0	0.267018	0	0.232798	0	0	0.318056	CPOD	P1PD	NoDiff			0	0	0	0	0	1	1	0	1
LOC_Os03g05460		25.1517	38.4768	33.9645	27.626	52.3579	38.1358	38.0318	48.2987	55.2158	P2PD	P2MP	NoDiff			0	0	0	1	0	1	0	0	0
LOC_Os03g05540		25.7054	17.8824	22.2149	23.1827	18.9471	2.90859	19.1318	15.6887	18.0499	NoDiff	P1NOD	NoDiff			1	0	0	0	0	0	0	0	0
LOC_Os03g05890		0.45899	0.303699	0.26383	0	0.131529	0.129241	0.17955	0.269818	0.827687	P2POD	NoDiff	NoDiff			0	0	0	0	0	0	1	0	0
LOC_Os03g05910		0.647317	0	0	0.268794	0	0	0.257304	1.21293	0	P2ND	NoDiff				0	1	0	0	0	0	0	0	0
LOC_Os03g05940		0.023822	0.364781	0	0	0	0.137987	0.296827	0.672178	0.023565	P2NOD	NoDiff				1	0	0	0	0	0	0	0	0
LOC_Os03g05950		0	0	0.423805	0.221384	0	0	0	0	0.115369	NoDiff	NoDiff	CPOD			0	0	0	0	0	0	1	0	1
LOC_Os03g06080		0	0	0	0	0	0.123687	0	0	0	NoDiff	CPOD	NoDiff			0	0	0	0	0	0	1	0	1
LOC_Os03g06180		0	0	0.234343	0	0.070098	0	0	0	0	NoDiff	NoDiff	CPOD			0	0	0	0	0	0	1	0	1
LOC_Os03g06190		16.7283	12.0908	19.3784	13.6076	13.6618	13.5267	12.6207	11.0077	11.7863	NoDiff	NoDiff	P1PD			0	0	0	0	0	1	0	0	0
LOC_Os03g06250		0.312848	0	0	0	0	0	0	0	0	NoDiff	NoDiff	P1ND			0	1	0	0	0	0	0	0	0
LOC_Os03g06340		35.672	29.0171	33.9338	31.6728	24.093	33.6658	26.4144	22.0154	22.6017	NoDiff	P1PD				0	0	0	0	0	1	0	0	0
LOC_Os03g06430		36.0939	41.1686	78.7213	26.6413	32.4606	34.11	40.9073	41.7219	37.8362	NoDiff	NoDiff	P2POD			0	0	0	0	0	0	1	0	0
LOC_Os03g06540		0.243716	0.207333	0.600381	0.371124	0.389108	0.338223	0.332146	0.276305	0.301363	NoDiff	NoDiff	P1POD			0	0	0	0	0	0	1	0	0
LOC_Os03g06580		6.29001	10.204	9.30421	5.54157	4.64176	5.18826	11.2093	15.1574	7.32301	P2NOD	NoDiff	NoDiff			1	0	0	0	0	0	0	0	0
LOC_Os03g06610		93.2221	77.2728	119.467	64.1428	83.0116	88.2128	97.9425	65.0326	78.6722	NoDiff	NoDiff	P1POD			0	0	0	0	0	0	1	0	0
LOC_Os03g06620		20.0898	19.9868	16.9896	18.3227	29.3125	22.4026	16.0379	14.4286	26.9036	P1POD	NoDiff	NoDiff			0	0	0	0	0	0	1	0	0
LOC_Os03g06705		21.5477	17.9625	7.09925	13.8861	13.5033	13.7129	9.89398	9.7077	9.28909	NoDiff	NoDiff	P1NOD			1	0	0	0	0	0	0	0	0
LOC_Os03g06730		6.5078	6.98095	5.44104	0	0	8.35708	7.3278	8.86848	0	CNOD	CPOD	NoDiff			1	0	0	0	0	0	1	1	1
LOC_Os03g06740		16.5055	14.6223	18.3355	18.51	20.7537	15.6667	13.3447	20.4326	27.5331	P2POD	NoDiff	NoDiff	OsGR1		0	0	0	0	0	0	1	0	0
LOC_Os03g06900		1.67147	0	4.3053	4.36546	1.04147	4.29015	3.68896	0.462174	3.56697			P1POD			0	0	0	0	0	0	1	0	0
LOC_Os03g06920	1	6.26	12.1978	9.00497	5.60061	13.9734	9.19924	4.49577	11.0573	7.73498	P2MP	P2MP	P2MP			0	0	0	3	0	0	0	0	0
LOC_Os03g06980		93.7226	44.5351	39.1799	66.433	50.4873	66.6421	46.5744	36.323	56.5461	NoDiff	NoDiff	P1ND			0	1	0	0	0	0	0	0	0
LOC_Os03g07000		1.14945	0.538969	0	0.622817	0.937767	0.344168	0	0.480931	0	NoDiff		CNOD			1	0	0	0	0	0	0	1	0
LOC_Os03g07020		0.197147	0.940024	0.463908	0.130982	0.745731	0.868415	0.143295	1.42548	0.98974	P2MP	P2PD				0	0	0	1	0	1	0	0	0
LOC_Os03g07040		0.153357	0	0.44075	0.127361	0	0.026988	0.092889	0.270452	0.368727	NoDiff	NoDiff	P1PD			0	0	0	0	0	1	0	0	0
LOC_Os03g07150		110.128	76.0708	127.596	11.7998	9.47289	76.9951	96.5693	90.0161	91.3677	NoDiff	P1POD				0	0	0	0	0	0	1	0	0
LOC_Os03g07200		2.53523	0	5.64017	2.83819	3.15531	2.97979	0	0	2.46834	NoDiff	NoDiff	P1PD			0	0	0	0	0	1	0	0	0
LOC_Os03g07270		0.340984	74.6474	31.4999	1.17319	92.5008	45.6303	1.23921	48.2678	26.7319	NoDiff	P2MP				0	0	0	1	0	0	0	0	0
LOC_Os03g07310		20.789	34.6769	40.0077	27.7528	30.8069	15.0547	32.1147	26.7234	30.6682	NoDiff	P2NOD	P2PD			1	0	0	0	0	1	0	0	0
LOC_Os03g07370		21.4716	11.6141	8.85491	17.9352	14.6107	16.5155	16.2335	16.5955	22.7896	P2POD	NoDiff	P1ND			0	1	0	0	0	0	1	0	0
LOC_Os03g07440		3.45678	4.61507	1.20276	3.02233	2.06537	3.18191	0.978438	1.64008	1.13619	NoDiff	NoDiff	P2NOD			1	0	0	0	0	0	0	0	0
LOC_Os03g07490		0	0	0.542954	0	0	0	0	0	0.272537	CPOD	NoDiff	CPOD			0	0	0	0	0	0	2	0	2
LOC_Os03g07500		0	0	0	0.096821	0	0	0.224306	0	0	P1ND	NoDiff	NoDiff			0	1	0	0	0	0	0	0	0
LOC_Os03g07560		0.197506	0.392049	0	0	0	0	0	0	0	NoDiff	NoDiff	CNOD			1	0	0	0	0	0	0	1	0
LOC_Os03g07680		0.287332	0.488515	1.12661	0.237748	0.476917	0.563025	0.610309	0.43227	0.341522	NoDiff	NoDiff	P2POD			0	0	0	0	0	0	1	0	0
LOC_Os03g07770		4.30629	4.62466	4.94516	3.73853	3.62375	5.82873	5.04617	4.10734	4.96279	NoDiff	P1POD	NoDiff			0	0	0	0	0	0	1	0	0
LOC_Os03g07800		114.205	99.8342	93.0592	105.474	68.359	91.0759	102.725	112.302	136.2	P2PD	NoDiff	NoDiff			0	0	0	0	0	1	0	0	0
LOC_Os03g07810		22.6856	17.9123	9.77668	17.9934	11.2213	14.5663	10.0973	11.2784	11.2842	NoDiff	NoDiff	P1ND			0	1	0	0	0	0	0	0	0
LOC_Os03g07870		18.3144	20.1251	10.2282	10.9283	18.5376	12.9777	14.8512	19.5828	20.1682	NoDiff	NoDiff	P2NOD			1	0	0	0	0	0	0	0	0
LOC_Os03g07880	1	8.49134	9.7769	17.7171	11.1311	12.1512	25.2801	15.8584	11.899	14.7971	NoDiff	P2POD	NoDiff			0	0	0	0	0	0	1	0	0
LOC_Os03g07890		10.4381	4.89302	4.48154	7.95518	6.77909	8.60244	9.82306	7.90095	12.6246	P1PD	NoDiff	P1ND			0	1	0	0	0	1	0	0	0
LOC_Os03g08150		1.55182	1.05305	0.243271	1.10327	1.04983	1.44743	0.640875	0.84486	1.03794	NoDiff	NoDiff	P1ND			0	1	0	0	0	0	0	0	0
LOC_Os03g08390		1.32772	1.22364	2.94368	2.19954	1.89558	1.44201	0.646237	1.58887	1.70333	NoDiff	NoDiff	P1POD			0	0	0	0	0	0	1	0	0
LOC_Os03g08560		4.88296	0	0	0	0	0	0	0	0	NoDiff	NoDiff	P1ND			0	1	0	0	0	0	0	0	0
LOC_Os03g08580		13.4843	13.1765	14.4484	11.7999	11.504	13.9618	14.6174	11.1702	17.7298	P1PD	NoDiff	NoDiff			0	0	0	0	0	1	0	0	0
LOC_Os03g08630		52.6696	49.4771	64.448	41.9931	37.4122	43.8833	34.5666	27.3777	32.1523	NoDiff	NoDiff	P1PD			0	0	0	0	0	1	0	0	0
LOC_Os03g08640		89.6974	33.0652	72.1798	47.6432	30.965	51.6867	20.8069	20.4121	42.741	P1POD					0	0	0	0	0	0	1	0	0
LOC_Os03g08754	1	0	0	0	0	0.521415	0	0	0.393639	0.115921		P2ND	NoDiff	OsMDP1		0	1	0	0	0	0	0	0	0
LOC_Os03g08790		88.4725	86.3733	73.972	56.4493	87.4376	97.2963	81.943	132.213	101.352	P2MP	P2PD	NoDiff	OsAP25		0	0	0	1	0	1	0	0	0
LOC_Os03g08860		16.7667	13.1384	36.7044	11.6119	12.1609	18.886	36.5989	12.8787	15.9366		NoDiff	P1POD			0	0	0	0	0	0	1	0	0
LOC_Os03g08920		0.6496	1.84209	0.906812	0.590866	1.22328	1.14974	0.646411	1.41837	1.92781	P2PD	NoDiff				0	0	0	0	0	1	0	0	0
LOC_Os03g08930	1	63.7713	58.3857	53.2853	57.5692	104.008	67.2319	123.418	144.571	161.129	P2PD		NoDiff			0	0	0	0	0	1	0	0	0
LOC_Os03g08950	1	3.12167	8.39804	6.57344	2.75492	5.34073	5.30144	2.35515	6.91449	5.47747	P2MP		P2MP			0	0	0	2	0	0	0	0	0
LOC_Os03g08980		0	0.146685	0.063714	0	0.031764	0.031211	0	0	0.031982	NoDiff	NoDiff	P2MP			0	0	0	1	0	0	0	0	0
LOC_Os03g09030		1.77754	1.63489	0	0	1.14547	1.42824	0	2.58961	0		NoDiff	P1ND			0	1	0	0	0	0	0	0	0
LOC_Os03g09045		31.5164	20.3509	15.3032	15.3085	19.2257	17.3595	17.3851	19.5682	22.3217	NoDiff	NoDiff	P1ND			0	1	0	0	0	0	0	0	0
LOC_Os03g09060		1.35021	5.71485	5.28688	1.92926	5.89737	4.48307	1.79636	5.32197	4.0571		P2MP	P2PD			0	0	0	1	0	1	0	0	0
LOC_Os03g09070		27.2954	39.5507	23.7864	25.4019	54.3894	33.0604	19.6527	40.1361	26.0715	P2MP	P2NPD	P2ND			0	1	1	1	0	0	0	0	0
LOC_Os03g09120		18.7283	24.7653	13.9228	13.5758	20.775	13.6004	14.5457	19.8051	15.9825	NoDiff		P2ND			0	1	0	0	0	0	0	0	0
LOC_Os03g09160		0	0	0.137736	0	0	0.206632	0	0	0.046091	NoDiff	CPOD	CPOD			0	0	0	0	0	0	2	0	2
LOC_Os03g09220		11.1925	12.2307	10.9102	2.16684	2.25727	2.41789	11.1962	10.1982	4.80575	P1NOD	NoDiff	NoDiff			1	0	0	0	0	0	0	0	0
LOC_Os03g09820		0	0	0	0	0.120888	0	0	0	0	NoDiff	P2ND	NoDiff			0	1	0	0	0	0	0	0	0
LOC_Os03g09860		33.5431	67.3403	26.1003	33.5847	41.7973	36.4804	27.6771	42.0973	41.6926		NoDiff	P2ND			0	1	0	0	0	0	0	0	0
LOC_Os03g10060		9.40813	25.6119	19.3625	9.36784	30.8471	21.3264	9.16134	28.8645	18.402	P2MP	P2MP				0	0	0	2	0	0	0	0	0
LOC_Os03g10110		5.11275	4.77082	3.83927	4.28237	6.14175	5.72163	5.35989	0	6.7223	P1PD	NoDiff	NoDiff			0	0	0	0	0	1	0	0	0
LOC_Os03g10120		8.32395	10.0045	2.78296	2.56301	5.4791	8.99502	6.55405	17.9792	16.1463			P2ND			0	1	0	0	0	0	0	0	0
LOC_Os03g10210	1	59.0045	121.804	60.3174	42.1184	71.7568	49.172	30.6901	36.8599	33.9191	NoDiff	NoDiff	P2ND			0	1	0	0	0	0	0	0	0
LOC_Os03g10300		0.52435	0	0	0.613673	0.315544	0	1.08848	0.369887	1.06854	P1PD	CNOD	P1ND			1	1	0	0	0	1	0	1	0
LOC_Os03g10310		0	19.6603	4.64284	0	23.763	9.85634	0	14.2735	7.32245	NoDiff	P2MP				0	0	0	1	0	0	0	0	0
LOC_Os03g10320		6.91838	9.77061	8.00109	4.93397	5.03613	8.05825	4.19332	26.7445	5.82409	P2ND	NoDiff	NoDiff			0	1	0	0	0	0	0	0	0
LOC_Os03g10350		30.1736	59.2296	113.061	94.9974	85.9657	88.4439	99.0704	85.0552	83.8345	NoDiff	NoDiff	P2POD			0	0	0	0	0	0	1	0	0
LOC_Os03g10420		17.1318	14.4315	19.25	18.6724	12.6306	22.1876	15.1772	15.6247	17.8765	NoDiff	P1PD	NoDiff			0	0	0	0	0	1	0	0	0
LOC_Os03g10469		3.94353	14.2795	0	4.40873	3.87452	5.34461	3.42544	2.67485	2.97971	NoDiff	NoDiff	P2ND			0	1	0	0	0	0	0	0	0
LOC_Os03g10478		0	0	0	0	0.079741	0	0	0.272634	0	P2ND	NoDiff	NoDiff			0	1	0	0	0	0	0	0	0
LOC_Os03g10550		0	0	0	0.234322	0	0.443458	0.254056	0	0.244221	NoDiff	P1PD	NoDiff			0	0	0	0	0	1	0	0	0
LOC_Os03g10620		41.3114	35.035	15.6385	22.8171	27.1798	20.7194	15.575	28.2659	27.4956	NoDiff	NoDiff	P1NOD	HTD2;D88;D14		1	0	0	0	0	0	0	0	0
LOC_Os03g10700		0.859644	91.7745	36.5767	0.162256	99.3423	55.7843	1.91709	98.3896	65.3104	P2MP	P2MP	P2MP			0	0	0	3	0	0	0	0	0
LOC_Os03g10730		0.370152	0	0	0.170136	0	0	0	0	0	NoDiff		P1ND			0	1	0	0	0	0	0	0	0
LOC_Os03g10760		0.081065	0.482745	1.95707	1.14451	0	0	0	0.428888	0.280673	NoDiff		P2POD			0	0	0	0	0	0	1	0	0
LOC_Os03g10800		203.054	160.309	305.739	218.625	147.735	211.466	181.443	178.807	147.722	NoDiff	NoDiff	P1POD			0	0	0	0	0	0	1	0	0
LOC_Os03g10850		5.905	4.76243	5.71523	4.56993	3.82109	5.72298	4.18903	3.35522	4.7503	NoDiff	P1PD	NoDiff			0	0	0	0	0	1	0	0	0
LOC_Os03g11040		2.58113	1.19899	0.326245	1.30567	0.504651	2.7965	0.640744	0.399624	2.19837	P1POD	P1PD	P1ND	CycF3;2		0	1	0	0	0	1	1	0	0
LOC_Os03g11130		0	1.08517	0.903206	0.540516	0.85923	0	0	1.22789	0		P2ND				0	1	0	0	0	0	0	0	0
LOC_Os03g11220		61.9684	61.2038	58.7378	50.9218	62.8666	73.2255	89.2423	67.2051	123.917	P1POD	NoDiff	NoDiff			0	0	0	0	0	0	1	0	0
LOC_Os03g11250		2.39145	1.6577	1.63645	1.22948	1.40324	2.08427	0.827725	0.468606	2.16135	P1POD	NoDiff	NoDiff			0	0	0	0	0	0	1	0	0
LOC_Os03g11335		0	0	0	0	0	0.125129	0	0	0	NoDiff	CPOD	NoDiff			0	0	0	0	0	0	1	0	1
LOC_Os03g11340		26.1927	19.8173	25.4584	24.8087	15.3373	17.6907	23.1392	15.2978	19.4616	P1MP					0	0	0	1	0	0	0	0	0
LOC_Os03g11400		30.056	31.1028	8.90125	10.882	25.1231	28.0553	5.78241	23.1083	24.5437			P2NOD			1	0	0	0	0	0	0	0	0
LOC_Os03g11490		4.46883	20.0245	14.6612	3.68402	16.7707	15.1837	2.83478	14.5012	9.10958	P2MP	P2PD	P2MP			0	0	0	2	0	1	0	0	0
LOC_Os03g11530		27.8948	20.1664	7.67124	11.9287	12.0119	30.9041	20.9445	15.3253	31.3218	P1POD	P2POD	P1NOD			1	0	0	0	0	0	2	0	0
LOC_Os03g11570		110.584	81.3341	129.702	84.8601	83.9367	91.6112	100.536	91.5237	106.517	NoDiff	NoDiff	P1PD			0	0	0	0	0	1	0	0	0
LOC_Os03g11590		43.0101	35.6559	17.2525	14.082	13.527	17.1151	33.8825	32.5411	35.8145	NoDiff	NoDiff	P1NOD			1	0	0	0	0	0	0	0	0
LOC_Os03g11614	1	193.961	74.5863	138.122	92.1644	23.7184	59.5248	21.4757	2.0227	12.7765	NoDiff	NoDiff	P1MP	OsMADS1; LHS1; AFO	OsMADS1; LHS1; AFO	0	0	0	1	0	0	0	0	0
LOC_Os03g11630		0.537381	0	0.132381	0.170015	0	0.043232	0.511491	0	0	P1ND	NoDiff				0	1	0	0	0	0	0	0	0
LOC_Os03g11910		39.9814	27.9249	11.6779	33.8657	10.5137	37.7675	6.60618	10.0029	2.44237	NoDiff		P1ND			0	1	0	0	0	0	0	0	0
LOC_Os03g12030		22.9936	13.3122	8.28248	10.0014	9.87349	9.70092	6.05785	7.51244	6.92665	NoDiff	NoDiff	P1ND			0	1	0	0	0	0	0	0	0
LOC_Os03g12080		0	0	0	0	0.46538	0	0	0	0	NoDiff	P2ND	NoDiff			0	1	0	0	0	0	0	0	0
LOC_Os03g12110		2.4586	2.03806	3.51997	3.61237	10.7988	2.22852	4.11014	4.58289	7.49446	P2POD	P2ND	NoDiff			0	1	0	0	0	0	1	0	0
LOC_Os03g12160		1.65343	7.90623	9.42904	7.32783	6.26139	7.08228	6.58866	6.90016	7.8685	NoDiff	NoDiff	P2PD			0	0	0	0	0	1	0	0	0
LOC_Os03g12270		0	0	0	0	0	0.223991	0	0	0	NoDiff	CPOD	NoDiff			0	0	0	0	0	0	1	0	1
LOC_Os03g12340		0.252623	2.75801	0.435627	0	0.434353	0.778016	0.272558	0.770365	0.218664	NoDiff	NoDiff	P2ND			0	1	0	0	0	0	0	0	0
LOC_Os03g12400		0	0.418693	0	0	0	0	0	0	0	NoDiff	NoDiff	P2ND			0	1	0	0	0	0	0	0	0
LOC_Os03g12450		90.1016	66.0972	98.7884	81.7469	60.7074	80.3442	66.0229	52.6602	68.4437	NoDiff		P1PD			0	0	0	0	0	1	0	0	0
LOC_Os03g12510		4.13528	0	0	1.1404	0.973964	4.10658	2.56859	0	7.85063	P1POD	P1POD				0	0	0	0	0	0	2	0	0
LOC_Os03g12520		0.272897	0	0	0.172567	0	0	0	0	0.179858	CPOD					0	0	0	0	0	0	1	0	1
LOC_Os03g12530		75.8322	64.2637	99.7561	71.4299	71.7267	87.4416	105.848	88.6788	112.371		NoDiff	P1POD	OsMTP8.1		0	0	0	0	0	0	1	0	0
LOC_Os03g12600		0	0	0	0.026903	0	0.036485	0	0	0	NoDiff	P1PD	NoDiff			0	0	0	0	0	1	0	0	0
LOC_Os03g12670		498.386	54.0641	288.746	365.649	66.7059	295.375	47.4609	198.963	239.596			P1MP			0	0	0	1	0	0	0	0	0
LOC_Os03g12810		12.2712	24.7081	21.8738	24.4319	25.9293	14.273	14.9017	24.0504	13.6723	P2ND	P2NOD				1	1	0	0	0	0	0	0	0
LOC_Os03g12815		6.42379	8.0138	3.29421	6.75742	8.43481	5.09281	7.83483	8.42092	6.81654	NoDiff		P2ND			0	1	0	0	0	0	0	0	0
LOC_Os03g12820		2.4434	0.474554	0.354361	1.60465	1.30054	1.31503	0.937667	0.259118	1.12653	NoDiff	NoDiff	P1ND	OsSRO1c		0	1	0	0	0	0	0	0	0
LOC_Os03g12945		0	0	0.121505	0.104843	0	0	0.050681	0	0	NoDiff	NoDiff	CPOD			0	0	0	0	0	0	1	0	1
LOC_Os03g12950	1	197.292	156.494	139.432	180.251	164.375	212.166	196.528	187.075	208.727	NoDiff	P1PD	P1ND			0	1	0	0	0	1	0	0	0
LOC_Os03g13080		0.104283	0	0	0.057737	0.059767	0	0.063165	0	0.090264	P1PD	CNOD	P1ND			1	1	0	0	0	1	0	1	0
[truncated: 6,251 more rows]
