# Supplementary material for: Large scale genomic and transcriptomic profiles of rice hybrids revealed a novel universal mechanism underlying yield heterosis
Source: Research Square preprint supplement (doi:10.21203/rs.3.rs-753426/v1), 2021-08-17
Supplement: Supplementary file 16 [file 54fc785015d23a0be827bf95.xlsx]

## Sheet: Sheet1
Supplementary Table 3 The two-way ANOVA of yield traits in japonica parents and their F1 populations
Trait	Variation source	Japonica parent						Japonica ×Nipponbare F1						Japonica ×9311 F1
		DF	MS	F	P	Var%		DF	MS	F	P	Var%		DF	MS	F	P	Var%
PBP	E	1	640.5	299.23	0	16.63		1	2388.08	1622	0	59.84		1	292.45	144.29	0	23.55
	G	127	16.29	7.61	0	53.72		123	7.74	5.26	0	23.86		97	5.14	2.53	0	40.13
	E*G	120	5.81	2.71	0	18.09		99	4.09	2.78	0	10.14		66	3.06	1.51	0.0255	16.24
	Error	208	2.14	0	0	11.56		167	1.47	0	0	6.16		123	2.03	0	0	20.08
SBP	E	1	4854.67	74.58	0	6.25		1	33223.4	778.93	0	46.62		1	12904.1	139.28	0	25.51
	G	127	352.71	5.42	0	57.64		123	176.74	4.14	0	30.51		97	183.28	1.98	0.0002	35.14
	E*G	120	121.01	1.86	0	18.69		98	94.06	2.21	0	12.94		66	128.95	1.39	0.058	16.82
	Error	208	65.09	0	0	17.42		166	42.65	0	0	9.94		123	92.65	0	0	22.53
SPP	E	1	86845.9	58.54	0	4.43		1	739000	889.64	0	44.91		1	241952	154.99	0	23.97
	G	127	9470.4	6.38	0	61.3		123	4587.31	5.52	0	34.29		97	3824.63	2.45	0	36.75
	E*G	120	3033.84	2.05	0	18.55		99	2063.49	2.48	0	12.42		66	3170.92	2.03	0.0004	20.73
	Error	208	1483.48	0	0	15.73		166	830.67	0	0	8.38		120	1561.09	0	0	18.56
KGW	E	1	1306.37	661.38	0	19.88		1	1610.45	1119.99	0	41.28		1	350.13	413.27	0	16.04
	G	125	31.96	16.18	0	60.79		115	13.18	9.17	0	38.85		91	15.45	18.23	0	64.4
	E*G	99	9.16	4.64	0	13.8		79	7.19	5	0	14.56		57	5.68	6.7	0	14.83
	Error	184	1.98	0	0	5.53		144	1.44	0	0	5.31		122	0.85	0	0	4.74
PNP	E	1	975.01	59.26	0	9.52		1	66.86	2.64	0.1065	0.39		1	645.33	41.29	0	7.9
	G	127	40.91	2.49	0	50.74		121	75.04	2.97	0	52.41		92	52.1	3.33	0	58.65
	E*G	108	11.16	0.68	0.9854	11.77		91	56.26	2.23	0	29.55		63	18.33	1.17	0.235	14.13
	Error	174	16.45	0	0	27.96		121	25.28	0	0	17.66		101	15.63	0	0	19.32
GWP	E	1	3274.77	39.91	0	6.11		1	13592.5	132.41	0	22.23		1	32796.1	153.41	0	30.23
	G	127	173.89	2.12	0	41.2		120	193.22	1.88	0.0003	37.92		92	477.53	2.23	0.0001	40.49
	E*G	105	133.05	1.62	0.0024	26.06		87	137.39	1.34	0.0691	19.55		59	179.62	0.84	0.7645	9.77
	Error	174	82.06	0	0	26.64		121	102.66	0	0	20.31		99	213.78	0	0	19.51
Note: E means environmental effects, G means genetic effect, E*G means environmental and genetic interaction.
