# Supplementary material for: Large scale genomic and transcriptomic profiles of rice hybrids revealed a novel universal mechanism underlying yield heterosis
Source: Research Square preprint supplement (doi:10.21203/rs.3.rs-753426/v1), 2021-08-17
Supplement: Supplementary file 17 [file 5be4ff8927e30b0e6ab8d534.xlsx]

## Sheet: Sheet1
Supplementary Table 4 The two-way ANOVA of yield traits in indica parents and their F1 populations
Trait	Variation source	Indica Parent						Indica×Nipponbare F1						Indica×9311 F1
		DF	MS	F	P	Var%		DF	MS	F	P	Var%		DF	MS	F	P	Var%
PBP	E	1	245.16	129.24	0	6.54		1	3746.47	1775.79	0	72.97		1	369.86	187.19	0	22.81
	G	157	14.51	7.65	0	60.72		148	3.85	1.82	0	11.1		150	3.69	1.87	0	34.13
	E*G	143	5.25	2.77	0	20		123	3.18	1.51	0.0048	7.63		104	3.08	1.56	0.0041	19.78
	Error	252	1.9	0	0	12.74		202	2.11	0	0	8.3		191	1.98	0	0	23.28
SBP	E	1	983.01	25.81	0	1.17		1	47115.2	1056.07	0	53.28		1	6370.83	87.9393	2.05805e-17	10.8451
	G	157	379.05	9.95	0	70.54		148	131.23	2.94	0	21.96		150	175.205	2.41843	5.26494e-09	44.738
	E*G	143	99.81	2.62	0	16.92		123	105.09	2.36	0	14.62		104	118.533	1.63616	0.00174034	20.9851
	Error	252	38.09	0	0	11.38		201	44.61	0	0	10.14		190	72.4457			23.4318
SPP	E	1	12086.2	12.72	0.0004	0.59		1	1.14899e+06	1308.35	0	58.36		1	83120.7	55.08	0	6.45
	G	157	9285.44	9.77	0	71.43		148	2723.53	3.1	0	20.47		150	4506.64	2.99	0	52.43
	E*G	143	2324.98	2.45	0	16.29		123	1946.65	2.22	0	12.16		104	2371.03	1.57	0.0038	19.12
	Error	251	950.03	0	0	11.68		202	878.2	0	0	9.01		188	1509.04	0	0	22
KGW	E	1	1627.48	2474.77	0	24.71		1	621.23	839.72	0	24.21		1	805.7	608.5	0	23.15
	G	157	24.91	37.88	0	59.39		137	9.94	13.43	0	53.05		145	14.08	10.63	0	58.64
	E*G	123	7.27	11.06	0	13.58		88	5.2	7.02	0	17.82		70	5.78	4.37	0	11.63
	Error	232	0.66	0	0	2.32		171	0.74	0	0	4.93		173	1.32	0	0	6.58
PNP	E	1	1548.03	86.18	0	10.8		1	7994.48	140.12	0	18.3		1	1398.29	126.42	0	16.84
	G	157	38.75	2.16	0	42.45		142	134.31	2.35	0	43.65		150	26.22	2.37	0	47.37
	E*G	132	20.55	1.14	0.1886	18.93		105	73.54	1.29	0.0749	17.67		84	15.35	1.39	0.0407	15.53
	Error	222	17.96	0	0	27.82		156	57.06	0	0	20.37		152	11.06	0	0	20.25
GWP	E	1	611.63	5.48	0.0201	0.93		1	30948.1	297.83	0	33.3		1	12869.8	57.24	0	10.14
	G	157	147.08	1.32	0.03	35.01		141	212.28	2.04	0	32.2		148	358.33	1.59	0.0026	41.76
	E*G	123	148.68	1.33	0.0335	27.72		99	165.38	1.59	0.005	17.62		76	377.62	1.68	0.0039	22.6
	Error	215	111.51	0	0	36.34		151	103.91	0	0	16.88		144	224.86	0	0	25.5
Note: E means environmental effects, G means genetic effect, E*G means environmental and genetic interaction.
