# Supplementary material for: Large scale genomic and transcriptomic profiles of rice hybrids revealed a novel universal mechanism underlying yield heterosis
Source: Research Square preprint supplement (doi:10.21203/rs.3.rs-753426/v1), 2021-08-17
Supplement: Supplementary file 18 [file 69980b01e7659d6b8afb41b2.xlsx]

## Sheet: Sheet1
Supplementary Table 11 The candidate genes within F1_QTLs and Hmp_QTLs of SPP related traits								Note: P1POD means the positive overdominant expression with 9311 as the parent of high expression; NoDiff means no different expression among parents and hybrid; MP means middle-parent expression; CNOD and CPOD mean comlementary negative overdominant expression and comlementary positive overdominant expression; d/a means dominant degree estimated by ratio between dominant effect and additive effe…
Trait	Type	QTLtag	Chr	start	stop	additive	dominance	d/a	Significantly associated gene	Candidate genes	High expression in panicle	Panicle-specific expression	Cloned	9311×PA64S 1mm	9311×PA64S 2mm	9311×PA64S 3mm	JBY×ZH100 2mm
CS-PBP-ind-9311-F1	OD	Chr1_13146310	1	13096914	13223171	0.178792	-1.04177	-6.39649	LOC_Os01g23320
CS-PBP-ind-9311-F1	OD	Chr1_13146310	1	13096914	13223171	0.178792	-1.04177	-6.39649	LOC_Os01g23410					NoDiff		P1ND
CS-PBP-ind-9311-F1	OD	Chr1_13146310	1	13096914	13223171	0.178792	-1.04177	-6.39649	LOC_Os01g23380	1	1
CS-PBP-ind-9311-F1	OD	Chr1_13146310	1	13096914	13223171	0.178792	-1.04177	-6.39649	LOC_Os01g23540
CS-PBP-ind-9311-F1	OD	Chr1_13146310	1	13096914	13223171	0.178792	-1.04177	-6.39649	LOC_Os01g23400
CS-PBP-ind-9311-F1	OD	Chr1_13146310	1	13096914	13223171	0.178792	-1.04177	-6.39649	LOC_Os01g23360
CS-PBP-ind-9311-F1	OD	Chr1_13146310	1	13096914	13223171	0.178792	-1.04177	-6.39649	LOC_Os01g23330
CS-PBP-ind-9311-F1	OD	Chr1_13146310	1	13096914	13223171	0.178792	-1.04177	-6.39649	LOC_Os01g23550
CS-PBP-ind-9311-F1	OD	Chr1_13146310	1	13096914	13223171	0.178792	-1.04177	-6.39649	LOC_Os01g23530
CS-PBP-ind-9311-F1	D	Chr1_13551240	1	13384521	13811472	0.615975	0.390671	0.629529	LOC_Os01g24010	1	1
CS-PBP-ind-9311-F1	D	Chr1_13551240	1	13384521	13811472	0.615975	0.390671	0.629529	LOC_Os01g23990
CS-PBP-ind-9311-F1	D	Chr1_13551240	1	13384521	13811472	0.615975	0.390671	0.629529	LOC_Os01g23880
CS-PBP-ind-9311-F1	D	Chr1_13551240	1	13384521	13811472	0.615975	0.390671	0.629529	LOC_Os01g24490
CS-PBP-ind-9311-F1	D	Chr1_13551240	1	13384521	13811472	0.615975	0.390671	0.629529	LOC_Os01g24340
CS-PBP-ind-9311-F1	D	Chr1_13551240	1	13384521	13811472	0.615975	0.390671	0.629529	LOC_Os01g24420					NoDiff	NoDiff	P1ND
CS-PBP-ind-9311-F1	D	Chr1_13551240	1	13384521	13811472	0.615975	0.390671	0.629529	LOC_Os01g24090
CS-PBP-ind-9311-F1	D	Chr1_13551240	1	13384521	13811472	0.615975	0.390671	0.629529	LOC_Os01g24060					P2PD	NoDiff	NoDiff
CS-PBP-ind-9311-F1	D	Chr1_13551240	1	13384521	13811472	0.615975	0.390671	0.629529	LOC_Os01g24030
CS-PBP-ind-9311-F1	D	Chr1_13551240	1	13384521	13811472	0.615975	0.390671	0.629529	LOC_Os01g24050
CS-PBP-ind-9311-F1	D	Chr1_13551240	1	13384521	13811472	0.615975	0.390671	0.629529	LOC_Os01g24020	1	1			P1POD	NoDiff	NoDiff
CS-PBP-ind-9311-F1	D	Chr1_13551240	1	13384521	13811472	0.615975	0.390671	0.629529	LOC_Os01g24350
CS-PBP-ind-9311-F1	D	Chr1_13551240	1	13384521	13811472	0.615975	0.390671	0.629529	LOC_Os01g24070
CS-PBP-ind-9311-F1	OD	Chr1_14319517	1	14111781	14319517	0.0526268	-0.768928	-28.122	LOC_Os01g25100
CS-PBP-ind-9311-F1	OD	Chr1_14319517	1	14111781	14319517	0.0526268	-0.768928	-28.122	LOC_Os01g25090
CS-PBP-ind-9311-F1	OD	Chr1_14319517	1	14111781	14319517	0.0526268	-0.768928	-28.122	LOC_Os01g25020
CS-PBP-ind-9311-F1	OD	Chr1_14319517	1	14111781	14319517	0.0526268	-0.768928	-28.122	LOC_Os01g25340
CS-PBP-ind-9311-F1	OD	Chr1_14319517	1	14111781	14319517	0.0526268	-0.768928	-28.122	LOC_Os01g25330
CS-PBP-ind-9311-F1	D	Chr1_14411576	1	14390967	14427785	0.567283	-0.50494	-1.10065	LOC_Os01g25450
CS-PBP-ind-9311-F1	D	Chr1_14411576	1	14390967	14427785	0.567283	-0.50494	-1.10065	LOC_Os01g25440	1
CS-PBP-ind-9311-F1	OD	Chr1_14941429	1	14708273	15147812	0.306712	-1.4604	-5.43337	LOC_Os01g27160	1	1						P2HP
CS-PBP-ind-9311-F1	OD	Chr1_14941429	1	14708273	15147812	0.306712	-1.4604	-5.43337	LOC_Os01g25930
CS-PBP-ind-9311-F1	OD	Chr1_14941429	1	14708273	15147812	0.306712	-1.4604	-5.43337	LOC_Os01g26290	1
CS-PBP-ind-9311-F1	OD	Chr1_14941429	1	14708273	15147812	0.306712	-1.4604	-5.43337	LOC_Os01g26020	1
CS-PBP-ind-9311-F1	OD	Chr1_14941429	1	14708273	15147812	0.306712	-1.4604	-5.43337	LOC_Os01g26340
CS-PBP-ind-9311-F1	OD	Chr1_19027817	1	18933814	19051696	0.15877	0.634537	4.29172	LOC_Os01g34510
CS-PBP-ind-9311-F1	OD	Chr1_19027817	1	18933814	19051696	0.15877	0.634537	4.29172	LOC_Os01g34450
CS-PBP-ind-9311-F1	OD	Chr1_19027817	1	18933814	19051696	0.15877	0.634537	4.29172	LOC_Os01g34440
CS-PBP-ind-9311-F1	OD	Chr1_19027817	1	18933814	19051696	0.15877	0.634537	4.29172	LOC_Os01g34420	1	1
CS-PBP-ind-9311-F1	OD	Chr1_19027817	1	18933814	19051696	0.15877	0.634537	4.29172	LOC_Os01g34374	1
CS-PBP-ind-9311-F1	OD	Chr1_19027817	1	18933814	19051696	0.15877	0.634537	4.29172	LOC_Os01g34410
CS-PBP-ind-9311-F1	OD	Chr1_19027817	1	18933814	19051696	0.15877	0.634537	4.29172	LOC_Os01g34520
CS-PBP-ind-9311-F1	OD	Chr1_19027817	1	18933814	19051696	0.15877	0.634537	4.29172	LOC_Os01g34330	1	1
CS-PBP-ind-9311-F1	OD	Chr1_39860915	1	39840080	39860915	0.182195	0.327931	1.88354	LOC_Os01g68630	1
CS-PBP-ind-9311-F1	OD	Chr1_39860915	1	39840080	39860915	0.182195	0.327931	1.88354	LOC_Os01g68620
CS-PBP-ind-9311-F1	OD	Chr1_39860915	1	39840080	39860915	0.182195	0.327931	1.88354	LOC_Os01g68610	1	1
CS-PBP-ind-9311-F1	OD	Chr1_39860915	1	39840080	39860915	0.182195	0.327931	1.88354	LOC_Os01g68598	1	1
CS-PBP-ind-9311-F1	OD	Chr1_39860915	1	39840080	39860915	0.182195	0.327931	1.88354	LOC_Os01g68589	1	1						P1OHP
CS-PBP-ind-9311-F1	OD	Chr1_39860915	1	39840080	39860915	0.182195	0.327931	1.88354	LOC_Os01g68640
CS-PBP-ind-9311-F1	OD	Chr1_6980615	1	6896876	7025817	0.315381	-1.33458	-4.43918	LOC_Os01g12540	1	1						P2LP
CS-PBP-ind-9311-F1	OD	Chr1_6980615	1	6896876	7025817	0.315381	-1.33458	-4.43918	LOC_Os01g12710	1							P1LP
CS-PBP-ind-9311-F1	OD	Chr1_6980615	1	6896876	7025817	0.315381	-1.33458	-4.43918	LOC_Os01g12700
CS-PBP-ind-9311-F1	OD	Chr1_6980615	1	6896876	7025817	0.315381	-1.33458	-4.43918	LOC_Os01g12690	1	1			NoDiff	NoDiff	P1NOD
CS-PBP-ind-9311-F1	OD	Chr1_6980615	1	6896876	7025817	0.315381	-1.33458	-4.43918	LOC_Os01g12550
CS-PBP-ind-9311-F1	OD	Chr1_6980615	1	6896876	7025817	0.315381	-1.33458	-4.43918	LOC_Os01g12660	1	1			P1POD	P2PD	P2POD
CS-PBP-ind-9311-F1	OD	Chr1_6980615	1	6896876	7025817	0.315381	-1.33458	-4.43918	LOC_Os01g12670	1	1						P2LP
CS-PBP-ind-9311-F1	OD	Chr1_6980615	1	6896876	7025817	0.315381	-1.33458	-4.43918	LOC_Os01g12570
CS-PBP-ind-9311-F1	OD	Chr1_6980615	1	6896876	7025817	0.315381	-1.33458	-4.43918	LOC_Os01g12590	1
CS-PBP-ind-9311-F1	OD	Chr10_11130843	10	11119507	11130843	0.324689	-0.859807	-2.74481	LOC_Os10g21700
CS-PBP-ind-9311-F1	OD	Chr10_11130843	10	11119507	11130843	0.324689	-0.859807	-2.74481	LOC_Os10g21690
CS-PBP-ind-9311-F1	OD	Chr10_22574106	10	22574106	22574151	0.307944	-0.807501	-2.62632	LOC_Os10g41980
CS-PBP-ind-9311-F1	OD	Chr10_22786082	10	22786043	22786082	0.171997	-2.24953	-16.6418	LOC_Os10g42320	1	1
CS-PBP-ind-9311-F1	OD	Chr11_2419749	11	2392960	2432290	0.0930615	1.05974	15.5107	LOC_Os11g05400	1							P1BLP
CS-PBP-ind-9311-F1	OD	Chr11_2419749	11	2392960	2432290	0.0930615	1.05974	15.5107	LOC_Os11g05394	1	1
CS-PBP-ind-9311-F1	OD	Chr11_2419749	11	2392960	2432290	0.0930615	1.05974	15.5107	LOC_Os11g05380	1
CS-PBP-ind-9311-F1	OD	Chr11_2419749	11	2392960	2432290	0.0930615	1.05974	15.5107	LOC_Os11g05390					NoDiff	P2POD	NoDiff
CS-PBP-ind-9311-F1	OD	Chr11_2419749	11	2392960	2432290	0.0930615	1.05974	15.5107	LOC_Os11g05410	1
CS-PBP-ind-9311-F1	OD	Chr11_2451505	11	2449359	2473768	0.143216	-0.986493	-7.56897	LOC_Os11g05460
CS-PBP-ind-9311-F1	OD	Chr11_2451505	11	2449359	2473768	0.143216	-0.986493	-7.56897	LOC_Os11g05480	1				P2PD	P2PD	NoDiff	P1HP
CS-PBP-ind-9311-F1	OD	Chr11_2451505	11	2449359	2473768	0.143216	-0.986493	-7.56897	LOC_Os11g05470	1
CS-PBP-ind-9311-F1	OD	Chr11_3560623	11	3531985	3799429	0.296982	1.0129	3.95363	LOC_Os11g07490	1	1
CS-PBP-ind-9311-F1	OD	Chr11_3560623	11	3531985	3799429	0.296982	1.0129	3.95363	LOC_Os11g07180
CS-PBP-ind-9311-F1	OD	Chr11_3560623	11	3531985	3799429	0.296982	1.0129	3.95363	LOC_Os11g07140
CS-PBP-ind-9311-F1	OD	Chr11_3560623	11	3531985	3799429	0.296982	1.0129	3.95363	LOC_Os11g07190
CS-PBP-ind-9311-F1	OD	Chr11_3560623	11	3531985	3799429	0.296982	1.0129	3.95363	LOC_Os11g07170
CS-PBP-ind-9311-F1	OD	Chr11_3560623	11	3531985	3799429	0.296982	1.0129	3.95363	LOC_Os11g07380
CS-PBP-ind-9311-F1	OD	Chr11_3560623	11	3531985	3799429	0.296982	1.0129	3.95363	LOC_Os11g07160
CS-PBP-ind-9311-F1	OD	Chr11_3560623	11	3531985	3799429	0.296982	1.0129	3.95363	LOC_Os11g07080
CS-PBP-ind-9311-F1	OD	Chr11_3560623	11	3531985	3799429	0.296982	1.0129	3.95363	LOC_Os11g07150
CS-PBP-ind-9311-F1	OD	Chr11_3560623	11	3531985	3799429	0.296982	1.0129	3.95363	LOC_Os11g07090	1	1
CS-PBP-ind-9311-F1	D	Chr12_27508794	12	27508794	27520193	0.480035	0.487161	1.04986	LOC_Os12g44380	1
CS-PBP-ind-9311-F1	D	Chr12_27508794	12	27508794	27520193	0.480035	0.487161	1.04986	LOC_Os12g44360	1
CS-PBP-ind-9311-F1	D	Chr12_2894101	12	2893208	2907040	0.484661	-0.633407	-1.39945	LOC_Os12g06150	1	1						P2BLP
CS-PBP-ind-9311-F1	OD	Chr12_2951531	12	2948477	2959768	0.410547	-0.619573	-1.5472	LOC_Os12g06220
CS-PBP-ind-9311-F1	OD	Chr12_2951531	12	2948477	2959768	0.410547	-0.619573	-1.5472	LOC_Os12g06210
CS-PBP-ind-9311-F1	OD	Chr12_2951531	12	2948477	2959768	0.410547	-0.619573	-1.5472	LOC_Os12g06230
CS-PBP-ind-9311-F1	OD	Chr12_8024096	12	8024096	8024616	0.118895	-0.941606	-39.471	LOC_Os12g14140	1
CS-PBP-ind-9311-F1	OD	Chr12_8024096	12	8024096	8024616	0.118895	-0.941606	-39.471	LOC_Os12g14132
CS-PBP-ind-9311-F1	OD	Chr12_9437547	12	9428654	9552204	0.0588674	-1.18914	-41.879	LOC_Os12g16650	1	1
CS-PBP-ind-9311-F1	OD	Chr12_9437547	12	9428654	9552204	0.0588674	-1.18914	-41.879	LOC_Os12g16490	1							P1BLP
CS-PBP-ind-9311-F1	OD	Chr12_9437547	12	9428654	9552204	0.0588674	-1.18914	-41.879	LOC_Os12g16510
CS-PBP-ind-9311-F1	OD	Chr12_9437547	12	9428654	9552204	0.0588674	-1.18914	-41.879	LOC_Os12g16670	1							P1BLP
CS-PBP-ind-9311-F1	OD	Chr12_9437547	12	9428654	9552204	0.0588674	-1.18914	-41.879	LOC_Os12g16470
CS-PBP-ind-9311-F1	OD	Chr12_9437547	12	9428654	9552204	0.0588674	-1.18914	-41.879	LOC_Os12g16480	1					P2POD		P1BLP
CS-PBP-ind-9311-F1	OD	Chr12_9643214	12	9564025	9739884	0.182657	1.03569	6.16783	LOC_Os12g16720	1
CS-PBP-ind-9311-F1	OD	Chr12_9643214	12	9564025	9739884	0.182657	1.03569	6.16783	LOC_Os12g16710
CS-PBP-ind-9311-F1	OD	Chr12_9643214	12	9564025	9739884	0.182657	1.03569	6.16783	LOC_Os12g17030
CS-PBP-ind-9311-F1	OD	Chr12_9643214	12	9564025	9739884	0.182657	1.03569	6.16783	LOC_Os12g16740
CS-PBP-ind-9311-F1	OD	Chr12_9643214	12	9564025	9739884	0.182657	1.03569	6.16783	LOC_Os12g16820
CS-PBP-ind-9311-F1	OD	Chr12_9643214	12	9564025	9739884	0.182657	1.03569	6.16783	LOC_Os12g16770
CS-PBP-ind-9311-F1	OD	Chr12_9643214	12	9564025	9739884	0.182657	1.03569	6.16783	LOC_Os12g16690	1	1
CS-PBP-ind-9311-F1	OD	Chr12_9798291	12	9772474	9804517	0.138487	1.17713	9.97512	LOC_Os12g17110
CS-PBP-ind-9311-F1	OD	Chr12_9798291	12	9772474	9804517	0.138487	1.17713	9.97512	LOC_Os12g17070	1	1
CS-PBP-ind-9311-F1	OD	Chr12_9798291	12	9772474	9804517	0.138487	1.17713	9.97512	LOC_Os12g17120	1				NoDiff	NoDiff	P2NOD	P1BLP
CS-PBP-ind-9311-F1	OD	Chr12_9798291	12	9772474	9804517	0.138487	1.17713	9.97512	LOC_Os12g17080	1			OGR1				P2LP
CS-PBP-ind-9311-F1	OD	Chr12_9798291	12	9772474	9804517	0.138487	1.17713	9.97512	LOC_Os12g17100
CS-PBP-ind-9311-F1	OD	Chr12_9798291	12	9772474	9804517	0.138487	1.17713	9.97512	LOC_Os12g17090	1	1						P1LP
CS-PBP-ind-9311-F1	OD	Chr12_9812879	12	9805832	9921396	0.412815	-1.04728	-3.25576	LOC_Os12g17160
CS-PBP-ind-9311-F1	OD	Chr12_9812879	12	9805832	9921396	0.412815	-1.04728	-3.25576	LOC_Os12g17260	1
CS-PBP-ind-9311-F1	OD	Chr12_9812879	12	9805832	9921396	0.412815	-1.04728	-3.25576	LOC_Os12g17320	1						P1PD
CS-PBP-ind-9311-F1	OD	Chr12_9812879	12	9805832	9921396	0.412815	-1.04728	-3.25576	LOC_Os12g17200
CS-PBP-ind-9311-F1	OD	Chr12_9812879	12	9805832	9921396	0.412815	-1.04728	-3.25576	LOC_Os12g17250
CS-PBP-ind-9311-F1	OD	Chr12_9812879	12	9805832	9921396	0.412815	-1.04728	-3.25576	LOC_Os12g17180
CS-PBP-ind-9311-F1	OD	Chr12_9812879	12	9805832	9921396	0.412815	-1.04728	-3.25576	LOC_Os12g17190					CPOD	NoDiff	NoDiff
CS-PBP-ind-9311-F1	OD	Chr12_9812879	12	9805832	9921396	0.412815	-1.04728	-3.25576	LOC_Os12g17290
CS-PBP-ind-9311-F1	OD	Chr12_9812879	12	9805832	9921396	0.412815	-1.04728	-3.25576	LOC_Os12g17130	1				NoDiff		CPOD	P1LP
CS-PBP-ind-9311-F1	OD	Chr12_9812879	12	9805832	9921396	0.412815	-1.04728	-3.25576	LOC_Os12g17240
CS-PBP-ind-9311-F1	OD	Chr12_9812879	12	9805832	9921396	0.412815	-1.04728	-3.25576	LOC_Os12g17140
CS-PBP-ind-9311-F1	OD	Chr12_9812879	12	9805832	9921396	0.412815	-1.04728	-3.25576	LOC_Os12g17230
CS-PBP-ind-9311-F1	OD	Chr12_9812879	12	9805832	9921396	0.412815	-1.04728	-3.25576	LOC_Os12g17310	1	1						P1BLP
CS-PBP-ind-9311-F1	OD	Chr12_9812879	12	9805832	9921396	0.412815	-1.04728	-3.25576	LOC_Os12g17170
CS-PBP-ind-9311-F1	OD	Chr12_9812879	12	9805832	9921396	0.412815	-1.04728	-3.25576	LOC_Os12g17300
CS-PBP-ind-9311-F1	OD	Chr12_9812879	12	9805832	9921396	0.412815	-1.04728	-3.25576	LOC_Os12g17270	1
CS-PBP-ind-9311-F1	OD	Chr12_9812879	12	9805832	9921396	0.412815	-1.04728	-3.25576	LOC_Os12g17150
CS-PBP-ind-9311-F1	OD	Chr2_12462590	2	12455918	12488541	0.851609	-2.4472	-2.87385	LOC_Os02g21060					P2POD	P1POD	NoDiff
CS-PBP-ind-9311-F1	OD	Chr2_12462590	2	12455918	12488541	0.851609	-2.4472	-2.87385	LOC_Os02g21030
CS-PBP-ind-9311-F1	OD	Chr2_12462590	2	12455918	12488541	0.851609	-2.4472	-2.87385	LOC_Os02g21040	1	1
CS-PBP-ind-9311-F1	OD	Chr2_17588254	2	17041927	17958259	0.370382	-2.55459	-6.90054	LOC_Os02g30200
CS-PBP-ind-9311-F1	OD	Chr2_17588254	2	17041927	17958259	0.370382	-2.55459	-6.90054	LOC_Os02g29060
CS-PBP-ind-9311-F1	OD	Chr2_17588254	2	17041927	17958259	0.370382	-2.55459	-6.90054	LOC_Os02g29200					NoDiff	NoDiff	CPOD
CS-PBP-ind-9311-F1	OD	Chr2_17588254	2	17041927	17958259	0.370382	-2.55459	-6.90054	LOC_Os02g29570
CS-PBP-ind-9311-F1	OD	Chr2_17588254	2	17041927	17958259	0.370382	-2.55459	-6.90054	LOC_Os02g29890	1	1
CS-PBP-ind-9311-F1	OD	Chr2_17588254	2	17041927	17958259	0.370382	-2.55459	-6.90054	LOC_Os02g28880
CS-PBP-ind-9311-F1	OD	Chr2_17588254	2	17041927	17958259	0.370382	-2.55459	-6.90054	LOC_Os02g29540
CS-PBP-ind-9311-F1	OD	Chr2_17588254	2	17041927	17958259	0.370382	-2.55459	-6.90054	LOC_Os02g28950
CS-PBP-ind-9311-F1	OD	Chr2_17588254	2	17041927	17958259	0.370382	-2.55459	-6.90054	LOC_Os02g29380	1	1						P1BLP
CS-PBP-ind-9311-F1	OD	Chr2_17588254	2	17041927	17958259	0.370382	-2.55459	-6.90054	LOC_Os02g29960	1							P1OHP
CS-PBP-ind-9311-F1	OD	Chr2_17588254	2	17041927	17958259	0.370382	-2.55459	-6.90054	LOC_Os02g29010
CS-PBP-ind-9311-F1	OD	Chr2_17588254	2	17041927	17958259	0.370382	-2.55459	-6.90054	LOC_Os02g29080
CS-PBP-ind-9311-F1	OD	Chr2_17588254	2	17041927	17958259	0.370382	-2.55459	-6.90054	LOC_Os02g29490
CS-PBP-ind-9311-F1	OD	Chr2_17588254	2	17041927	17958259	0.370382	-2.55459	-6.90054	LOC_Os02g29150	1
CS-PBP-ind-9311-F1	OD	Chr2_17588254	2	17041927	17958259	0.370382	-2.55459	-6.90054	LOC_Os02g29760
CS-PBP-ind-9311-F1	OD	Chr2_17588254	2	17041927	17958259	0.370382	-2.55459	-6.90054	LOC_Os02g28830	1							P2BLP
CS-PBP-ind-9311-F1	OD	Chr2_17588254	2	17041927	17958259	0.370382	-2.55459	-6.90054	LOC_Os02g29130	1	1
CS-PBP-ind-9311-F1	OD	Chr2_17588254	2	17041927	17958259	0.370382	-2.55459	-6.90054	LOC_Os02g29580					P2PD	NoDiff	NoDiff
CS-PBP-ind-9311-F1	OD	Chr2_17588254	2	17041927	17958259	0.370382	-2.55459	-6.90054	LOC_Os02g29220	1							P2LP
CS-PBP-ind-9311-F1	OD	Chr2_17588254	2	17041927	17958259	0.370382	-2.55459	-6.90054	LOC_Os02g29520
CS-PBP-ind-9311-F1	OD	Chr2_17588254	2	17041927	17958259	0.370382	-2.55459	-6.90054	LOC_Os02g29480	1	1
CS-PBP-ind-9311-F1	OD	Chr2_17588254	2	17041927	17958259	0.370382	-2.55459	-6.90054	LOC_Os02g29040	1	1
CS-PBP-ind-9311-F1	OD	Chr2_17588254	2	17041927	17958259	0.370382	-2.55459	-6.90054	LOC_Os02g29400	1	1						P1OHP
CS-PBP-ind-9311-F1	OD	Chr2_17588254	2	17041927	17958259	0.370382	-2.55459	-6.90054	LOC_Os02g29000
CS-PBP-ind-9311-F1	OD	Chr2_17588254	2	17041927	17958259	0.370382	-2.55459	-6.90054	LOC_Os02g28930
CS-PBP-ind-9311-F1	OD	Chr2_17588254	2	17041927	17958259	0.370382	-2.55459	-6.90054	LOC_Os02g28990
CS-PBP-ind-9311-F1	OD	Chr2_17588254	2	17041927	17958259	0.370382	-2.55459	-6.90054	LOC_Os02g29160	1	1
CS-PBP-ind-9311-F1	OD	Chr2_17588254	2	17041927	17958259	0.370382	-2.55459	-6.90054	LOC_Os02g29390
CS-PBP-ind-9311-F1	OD	Chr2_17588254	2	17041927	17958259	0.370382	-2.55459	-6.90054	LOC_Os02g29590
CS-PBP-ind-9311-F1	OD	Chr2_17588254	2	17041927	17958259	0.370382	-2.55459	-6.90054	LOC_Os02g29464	1	1						P1LP
CS-PBP-ind-9311-F1	OD	Chr2_17588254	2	17041927	17958259	0.370382	-2.55459	-6.90054	LOC_Os02g29600
CS-PBP-ind-9311-F1	OD	Chr2_17588254	2	17041927	17958259	0.370382	-2.55459	-6.90054	LOC_Os02g29510	1
CS-PBP-ind-9311-F1	OD	Chr2_17588254	2	17041927	17958259	0.370382	-2.55459	-6.90054	LOC_Os02g29410
CS-PBP-ind-9311-F1	OD	Chr2_17588254	2	17041927	17958259	0.370382	-2.55459	-6.90054	LOC_Os02g29030	1
CS-PBP-ind-9311-F1	OD	Chr2_17588254	2	17041927	17958259	0.370382	-2.55459	-6.90054	LOC_Os02g29370
CS-PBP-ind-9311-F1	OD	Chr2_17588254	2	17041927	17958259	0.370382	-2.55459	-6.90054	LOC_Os02g28980	1				P2POD		NoDiff
CS-PBP-ind-9311-F1	OD	Chr2_17588254	2	17041927	17958259	0.370382	-2.55459	-6.90054	LOC_Os02g29090
CS-PBP-ind-9311-F1	OD	Chr2_17588254	2	17041927	17958259	0.370382	-2.55459	-6.90054	LOC_Os02g29900
CS-PBP-ind-9311-F1	OD	Chr2_17588254	2	17041927	17958259	0.370382	-2.55459	-6.90054	LOC_Os02g29550
CS-PBP-ind-9311-F1	OD	Chr2_17588254	2	17041927	17958259	0.370382	-2.55459	-6.90054	LOC_Os02g28910
CS-PBP-ind-9311-F1	OD	Chr2_17588254	2	17041927	17958259	0.370382	-2.55459	-6.90054	LOC_Os02g29350
CS-PBP-ind-9311-F1	OD	Chr2_17588254	2	17041927	17958259	0.370382	-2.55459	-6.90054	LOC_Os02g29340
CS-PBP-ind-9311-F1	OD	Chr2_17588254	2	17041927	17958259	0.370382	-2.55459	-6.90054	LOC_Os02g29190	1	1
CS-PBP-ind-9311-F1	OD	Chr2_17588254	2	17041927	17958259	0.370382	-2.55459	-6.90054	LOC_Os02g28970
CS-PBP-ind-9311-F1	OD	Chr2_17588254	2	17041927	17958259	0.370382	-2.55459	-6.90054	LOC_Os02g29020
CS-PBP-ind-9311-F1	OD	Chr2_17588254	2	17041927	17958259	0.370382	-2.55459	-6.90054	LOC_Os02g29310
CS-PBP-ind-9311-F1	OD	Chr2_17588254	2	17041927	17958259	0.370382	-2.55459	-6.90054	LOC_Os02g29440
CS-PBP-ind-9311-F1	OD	Chr2_17588254	2	17041927	17958259	0.370382	-2.55459	-6.90054	LOC_Os02g29230
CS-PBP-ind-9311-F1	OD	Chr2_17588254	2	17041927	17958259	0.370382	-2.55459	-6.90054	LOC_Os02g29450
CS-PBP-ind-9311-F1	OD	Chr2_17588254	2	17041927	17958259	0.370382	-2.55459	-6.90054	LOC_Os02g29170
CS-PBP-ind-9311-F1	OD	Chr2_17588254	2	17041927	17958259	0.370382	-2.55459	-6.90054	LOC_Os02g29320	1	1
CS-PBP-ind-9311-F1	OD	Chr2_17588254	2	17041927	17958259	0.370382	-2.55459	-6.90054	LOC_Os02g29050
CS-PBP-ind-9311-F1	OD	Chr2_17588254	2	17041927	17958259	0.370382	-2.55459	-6.90054	LOC_Os02g28850	1	1
CS-PBP-ind-9311-F1	OD	Chr2_17588254	2	17041927	17958259	0.370382	-2.55459	-6.90054	LOC_Os02g29210	1							P1LP
CS-PBP-ind-9311-F1	OD	Chr2_17588254	2	17041927	17958259	0.370382	-2.55459	-6.90054	LOC_Os02g30190
CS-PBP-ind-9311-F1	OD	Chr2_17588254	2	17041927	17958259	0.370382	-2.55459	-6.90054	LOC_Os02g28900	1
CS-PBP-ind-9311-F1	OD	Chr2_17588254	2	17041927	17958259	0.370382	-2.55459	-6.90054	LOC_Os02g29530	1							P2OHP
CS-PBP-ind-9311-F1	OD	Chr2_17588254	2	17041927	17958259	0.370382	-2.55459	-6.90054	LOC_Os02g29640	1				P1PPD	P1MP	P1MP
CS-PBP-ind-9311-F1	OD	Chr2_17588254	2	17041927	17958259	0.370382	-2.55459	-6.90054	LOC_Os02g28920					CNOD	NoDiff	NoDiff
CS-PBP-ind-9311-F1	OD	Chr2_17588254	2	17041927	17958259	0.370382	-2.55459	-6.90054	LOC_Os02g28940					NoDiff	NoDiff	P2ND
CS-PBP-ind-9311-F1	OD	Chr2_17588254	2	17041927	17958259	0.370382	-2.55459	-6.90054	LOC_Os02g28960
CS-PBP-ind-9311-F1	OD	Chr2_17588254	2	17041927	17958259	0.370382	-2.55459	-6.90054	LOC_Os02g29140	1
CS-PBP-ind-9311-F1	OD	Chr2_17588254	2	17041927	17958259	0.370382	-2.55459	-6.90054	LOC_Os02g28840
CS-PBP-ind-9311-F1	OD	Chr2_17588254	2	17041927	17958259	0.370382	-2.55459	-6.90054	LOC_Os02g28890
CS-PBP-ind-9311-F1	OD	Chr2_33455136	2	33440916	33489408	0.395359	2.02148	5.11435	LOC_Os02g54650	1
CS-PBP-ind-9311-F1	OD	Chr2_33455136	2	33440916	33489408	0.395359	2.02148	5.11435	LOC_Os02g54624	1							P2HP
CS-PBP-ind-9311-F1	OD	Chr2_33455136	2	33440916	33489408	0.395359	2.02148	5.11435	LOC_Os02g54640	1	1
CS-PBP-ind-9311-F1	OD	Chr2_33455136	2	33440916	33489408	0.395359	2.02148	5.11435	LOC_Os02g54680
CS-PBP-ind-9311-F1	OD	Chr2_33455136	2	33440916	33489408	0.395359	2.02148	5.11435	LOC_Os02g54600	1	1						P1LP
CS-PBP-ind-9311-F1	OD	Chr2_33455136	2	33440916	33489408	0.395359	2.02148	5.11435	LOC_Os02g54610
CS-PBP-ind-9311-F1	D	Chr2_3464819	2	3337431	3469493	1.00759	0.713868	0.708545	LOC_Os02g06640	1							P2HP
CS-PBP-ind-9311-F1	D	Chr2_3464819	2	3337431	3469493	1.00759	0.713868	0.708545	LOC_Os02g06660
CS-PBP-ind-9311-F1	D	Chr2_3464819	2	3337431	3469493	1.00759	0.713868	0.708545	LOC_Os02g06870
CS-PBP-ind-9311-F1	D	Chr2_3464819	2	3337431	3469493	1.00759	0.713868	0.708545	LOC_Os02g06890
CS-PBP-ind-9311-F1	D	Chr2_3464819	2	3337431	3469493	1.00759	0.713868	0.708545	LOC_Os02g06630
CS-PBP-ind-9311-F1	D	Chr2_3464819	2	3337431	3469493	1.00759	0.713868	0.708545	LOC_Os02g06720	1	1
CS-PBP-ind-9311-F1	D	Chr2_3464819	2	3337431	3469493	1.00759	0.713868	0.708545	LOC_Os02g06880					NoDiff	P1POD
CS-PBP-ind-9311-F1	D	Chr2_3464819	2	3337431	3469493	1.00759	0.713868	0.708545	LOC_Os02g06850
CS-PBP-ind-9311-F1	D	Chr2_3464819	2	3337431	3469493	1.00759	0.713868	0.708545	LOC_Os02g06725	1
CS-PBP-ind-9311-F1	D	Chr2_3464819	2	3337431	3469493	1.00759	0.713868	0.708545	LOC_Os02g06700	1	1
CS-PBP-ind-9311-F1	D	Chr2_3464819	2	3337431	3469493	1.00759	0.713868	0.708545	LOC_Os02g06840
CS-PBP-ind-9311-F1	D	Chr2_3464819	2	3337431	3469493	1.00759	0.713868	0.708545	LOC_Os02g06650	1					P1POD	P1ND	P1OHP
CS-PBP-ind-9311-F1	OD	Chr2_5847055	2	5838762	5860057	0.127664	-1.37197	-11.4295	LOC_Os02g11000					NoDiff	P1POD	P2PD
CS-PBP-ind-9311-F1	OD	Chr2_5847055	2	5838762	5860057	0.127664	-1.37197	-11.4295	LOC_Os02g11010
CS-PBP-ind-9311-F1	OD	Chr2_5847055	2	5838762	5860057	0.127664	-1.37197	-11.4295	LOC_Os02g10990
CS-PBP-ind-9311-F1	OD	Chr2_6795783	2	6795783	6921930	0.0540184	-1.32618	-56.5699	LOC_Os02g12939
CS-PBP-ind-9311-F1	OD	Chr2_6795783	2	6795783	6921930	0.0540184	-1.32618	-56.5699	LOC_Os02g12910
CS-PBP-ind-9311-F1	OD	Chr2_6795783	2	6795783	6921930	0.0540184	-1.32618	-56.5699	LOC_Os02g12890	1	1
CS-PBP-ind-9311-F1	OD	Chr2_6795783	2	6795783	6921930	0.0540184	-1.32618	-56.5699	LOC_Os02g13060	1				NoDiff		P2ND	P1HP
CS-PBP-ind-9311-F1	OD	Chr2_6795783	2	6795783	6921930	0.0540184	-1.32618	-56.5699	LOC_Os02g12960
CS-PBP-ind-9311-F1	OD	Chr2_6795783	2	6795783	6921930	0.0540184	-1.32618	-56.5699	LOC_Os02g12900	1	1						P1BLP
CS-PBP-ind-9311-F1	OD	Chr2_6795783	2	6795783	6921930	0.0540184	-1.32618	-56.5699	LOC_Os02g12880	1	1
CS-PBP-ind-9311-F1	OD	Chr2_6795783	2	6795783	6921930	0.0540184	-1.32618	-56.5699	LOC_Os02g12950
CS-PBP-ind-9311-F1	OD	Chr3_15815756	3	15725188	15918638	0.0377295	-1.67487	-45.6898	LOC_Os03g27530
CS-PBP-ind-9311-F1	OD	Chr3_15815756	3	15725188	15918638	0.0377295	-1.67487	-45.6898	LOC_Os03g27410
CS-PBP-ind-9311-F1	OD	Chr3_15815756	3	15725188	15918638	0.0377295	-1.67487	-45.6898	LOC_Os03g27700
CS-PBP-ind-9311-F1	OD	Chr3_15815756	3	15725188	15918638	0.0377295	-1.67487	-45.6898	LOC_Os03g27510
CS-PBP-ind-9311-F1	OD	Chr3_15815756	3	15725188	15918638	0.0377295	-1.67487	-45.6898	LOC_Os03g27590
CS-PBP-ind-9311-F1	OD	Chr3_15815756	3	15725188	15918638	0.0377295	-1.67487	-45.6898	LOC_Os03g27750
CS-PBP-ind-9311-F1	OD	Chr3_15815756	3	15725188	15918638	0.0377295	-1.67487	-45.6898	LOC_Os03g27670
CS-PBP-ind-9311-F1	OD	Chr3_15815756	3	15725188	15918638	0.0377295	-1.67487	-45.6898	LOC_Os03g27550
CS-PBP-ind-9311-F1	OD	Chr3_15815756	3	15725188	15918638	0.0377295	-1.67487	-45.6898	LOC_Os03g27610
CS-PBP-ind-9311-F1	OD	Chr3_15815756	3	15725188	15918638	0.0377295	-1.67487	-45.6898	LOC_Os03g27710
CS-PBP-ind-9311-F1	OD	Chr3_15815756	3	15725188	15918638	0.0377295	-1.67487	-45.6898	LOC_Os03g27690
CS-PBP-ind-9311-F1	OD	Chr3_1816239	3	1793409	1939378	0.0974073	2.0767	23.0126	LOC_Os03g04169	1							P2LP
CS-PBP-ind-9311-F1	OD	Chr3_1816239	3	1793409	1939378	0.0974073	2.0767	23.0126	LOC_Os03g04000
CS-PBP-ind-9311-F1	OD	Chr3_1816239	3	1793409	1939378	0.0974073	2.0767	23.0126	LOC_Os03g03930	1	1
CS-PBP-ind-9311-F1	OD	Chr3_1816239	3	1793409	1939378	0.0974073	2.0767	23.0126	LOC_Os03g03920	1							P1LP
CS-PBP-ind-9311-F1	OD	Chr3_1816239	3	1793409	1939378	0.0974073	2.0767	23.0126	LOC_Os03g04220	1	1
CS-PBP-ind-9311-F1	OD	Chr3_1816239	3	1793409	1939378	0.0974073	2.0767	23.0126	LOC_Os03g03949	1							P1HP
CS-PBP-ind-9311-F1	OD	Chr3_1816239	3	1793409	1939378	0.0974073	2.0767	23.0126	LOC_Os03g03990	1			OscpSRP43	NoDiff	NoDiff	P1NOD
CS-PBP-ind-9311-F1	OD	Chr3_1816239	3	1793409	1939378	0.0974073	2.0767	23.0126	LOC_Os03g03980
CS-PBP-ind-9311-F1	OD	Chr3_1816239	3	1793409	1939378	0.0974073	2.0767	23.0126	LOC_Os03g03970
CS-PBP-ind-9311-F1	OD	Chr3_2184866	3	2085889	2278621	0.0945502	0.926469	11.5005	LOC_Os03g04790						P1MP	CPOD
CS-PBP-ind-9311-F1	OD	Chr3_2184866	3	2085889	2278621	0.0945502	0.926469	11.5005	LOC_Os03g04670
CS-PBP-ind-9311-F1	OD	Chr3_2184866	3	2085889	2278621	0.0945502	0.926469	11.5005	LOC_Os03g04650
CS-PBP-ind-9311-F1	OD	Chr3_2184866	3	2085889	2278621	0.0945502	0.926469	11.5005	LOC_Os03g04780
CS-PBP-ind-9311-F1	OD	Chr3_2184866	3	2085889	2278621	0.0945502	0.926469	11.5005	LOC_Os03g04490	1	1						P2LP
CS-PBP-ind-9311-F1	OD	Chr3_2735487	3	2712732	2746350	0.0467726	1.32965	41.1421	LOC_Os03g05480	1	1
CS-PBP-ind-9311-F1	OD	Chr3_2735487	3	2712732	2746350	0.0467726	1.32965	41.1421	LOC_Os03g05490
CS-PBP-ind-9311-F1	OD	Chr3_2735487	3	2712732	2746350	0.0467726	1.32965	41.1421	LOC_Os03g05520	1	1
CS-PBP-ind-9311-F1	OD	Chr4_16355682	4	16355682	16355695	0.0871015	-1.28623	-27.2537	LOC_Os04g27670
CS-PBP-ind-9311-F1	OD	Chr4_19768275	4	19685359	19768275	0.222996	-1.45966	-6.65384	LOC_Os04g32770	1				P2MP	P2MP	P2MP
CS-PBP-ind-9311-F1	OD	Chr4_19768275	4	19685359	19768275	0.222996	-1.45966	-6.65384	LOC_Os04g32660	1						P1MP	P1OHP
CS-PBP-ind-9311-F1	OD	Chr4_19768275	4	19685359	19768275	0.222996	-1.45966	-6.65384	LOC_Os04g32760					P2MP
CS-PBP-ind-9311-F1	OD	Chr4_19840365	4	19840365	19842823	0.145438	-1.548	-10.7633	LOC_Os04g32860	1	1
CS-PBP-ind-9311-F1	OD	Chr4_31436489	4	31436489	31437005	0.44175	0.6996	1.62357	LOC_Os04g52800	1
CS-PBP-ind-9311-F1	OD	Chr4_31543468	4	31543468	31543518	0.113719	1.05396	9.31426	LOC_Os04g52960	1	1			NoDiff	P1PD		P1BLP
CS-PBP-ind-9311-F1	OD	Chr4_31543468	4	31543468	31543518	0.113719	1.05396	9.31426	LOC_Os04g52950	1	1
CS-PBP-ind-9311-F1	OD	Chr5_212630	5	211511	225989	0.196364	-1.08287	-8.68885	LOC_Os05g01330	1							P1BLP
CS-PBP-ind-9311-F1	OD	Chr5_212630	5	211511	225989	0.196364	-1.08287	-8.68885	LOC_Os05g01370					NoDiff	CPOD	NoDiff
CS-PBP-ind-9311-F1	OD	Chr5_212630	5	211511	225989	0.196364	-1.08287	-8.68885	LOC_Os05g01350	1	1						P2LP
CS-PBP-ind-9311-F1	OD	Chr5_212630	5	211511	225989	0.196364	-1.08287	-8.68885	LOC_Os05g01360	1
CS-PBP-ind-9311-F1	OD	Chr5_245867	5	245378	256212	0.199733	-1.3178	-21.9272	LOC_Os05g01440	1
CS-PBP-ind-9311-F1	OD	Chr5_245867	5	245378	256212	0.199733	-1.3178	-21.9272	LOC_Os05g01420
CS-PBP-ind-9311-F1	OD	Chr5_245867	5	245378	256212	0.199733	-1.3178	-21.9272	LOC_Os05g01444
CS-PBP-ind-9311-F1	OD	Chr5_29067065	5	29019044	29067065	0.549283	1.60955	2.93407	LOC_Os05g50680	1							P1OHP
CS-PBP-ind-9311-F1	OD	Chr5_29067065	5	29019044	29067065	0.549283	1.60955	2.93407	LOC_Os05g50700
CS-PBP-ind-9311-F1	OD	Chr5_29067065	5	29019044	29067065	0.549283	1.60955	2.93407	LOC_Os05g50660	1
CS-PBP-ind-9311-F1	OD	Chr5_29067065	5	29019044	29067065	0.549283	1.60955	2.93407	LOC_Os05g50654	1				NoDiff	NoDiff	P1ND
CS-PBP-ind-9311-F1	OD	Chr6_1564681	6	1541424	1589230	0.13638	0.814558	60.2291	LOC_Os06g03890
CS-PBP-ind-9311-F1	OD	Chr6_1564681	6	1541424	1589230	0.13638	0.814558	60.2291	LOC_Os06g03900
CS-PBP-ind-9311-F1	OD	Chr6_1564681	6	1541424	1589230	0.13638	0.814558	60.2291	LOC_Os06g03830
CS-PBP-ind-9311-F1	OD	Chr6_1564681	6	1541424	1589230	0.13638	0.814558	60.2291	LOC_Os06g03940	1
CS-PBP-ind-9311-F1	OD	Chr6_1564681	6	1541424	1589230	0.13638	0.814558	60.2291	LOC_Os06g03880
CS-PBP-ind-9311-F1	OD	Chr6_1564681	6	1541424	1589230	0.13638	0.814558	60.2291	LOC_Os06g03920	1	1
CS-PBP-ind-9311-F1	OD	Chr6_29873846	6	29837438	29893975	0.541285	-1.37592	-2.57299	LOC_Os06g49340
CS-PBP-ind-9311-F1	OD	Chr6_29873846	6	29837438	29893975	0.541285	-1.37592	-2.57299	LOC_Os06g49300
CS-PBP-ind-9311-F1	OD	Chr6_29873846	6	29837438	29893975	0.541285	-1.37592	-2.57299	LOC_Os06g49250	1							P2LP
CS-PBP-ind-9311-F1	OD	Chr6_29873846	6	29837438	29893975	0.541285	-1.37592	-2.57299	LOC_Os06g49320	1				NoDiff		P1ND
CS-PBP-ind-9311-F1	D	Chr6_3057772	6	2963058	3285190	0.254316	0.32926	1.35199	LOC_Os06g06380	1	1
CS-PBP-ind-9311-F1	D	Chr6_3057772	6	2963058	3285190	0.254316	0.32926	1.35199	LOC_Os06g06750	1	1
CS-PBP-ind-9311-F1	D	Chr6_3057772	6	2963058	3285190	0.254316	0.32926	1.35199	LOC_Os06g06560	1							P1LP
CS-PBP-ind-9311-F1	D	Chr6_3057772	6	2963058	3285190	0.254316	0.32926	1.35199	LOC_Os06g06450	1	1
CS-PBP-ind-9311-F1	D	Chr6_3057772	6	2963058	3285190	0.254316	0.32926	1.35199	LOC_Os06g06810	1
CS-PBP-ind-9311-F1	D	Chr6_3057772	6	2963058	3285190	0.254316	0.32926	1.35199	LOC_Os06g06520
CS-PBP-ind-9311-F1	D	Chr6_3057772	6	2963058	3285190	0.254316	0.32926	1.35199	LOC_Os06g06920
CS-PBP-ind-9311-F1	D	Chr6_3057772	6	2963058	3285190	0.254316	0.32926	1.35199	LOC_Os06g06690
CS-PBP-ind-9311-F1	D	Chr6_3057772	6	2963058	3285190	0.254316	0.32926	1.35199	LOC_Os06g06910
CS-PBP-ind-9311-F1	D	Chr6_3057772	6	2963058	3285190	0.254316	0.32926	1.35199	LOC_Os06g06720	1
CS-PBP-ind-9311-F1	D	Chr6_3057772	6	2963058	3285190	0.254316	0.32926	1.35199	LOC_Os06g06850	1							P1LP
CS-PBP-ind-9311-F1	D	Chr6_3057772	6	2963058	3285190	0.254316	0.32926	1.35199	LOC_Os06g06900	1
CS-PBP-ind-9311-F1	D	Chr6_3057772	6	2963058	3285190	0.254316	0.32926	1.35199	LOC_Os06g06410	1	1			NoDiff	NoDiff	P1ND
CS-PBP-ind-9311-F1	D	Chr6_3057772	6	2963058	3285190	0.254316	0.32926	1.35199	LOC_Os06g06400
CS-PBP-ind-9311-F1	D	Chr6_3057772	6	2963058	3285190	0.254316	0.32926	1.35199	LOC_Os06g06790	1	1			NoDiff	NoDiff	P1POD
CS-PBP-ind-9311-F1	D	Chr6_3057772	6	2963058	3285190	0.254316	0.32926	1.35199	LOC_Os06g06460					NoDiff	NoDiff	P1ND
CS-PBP-ind-9311-F1	D	Chr6_3057772	6	2963058	3285190	0.254316	0.32926	1.35199	LOC_Os06g06470	1							P2HP
CS-PBP-ind-9311-F1	D	Chr6_3057772	6	2963058	3285190	0.254316	0.32926	1.35199	LOC_Os06g06860	1
CS-PBP-ind-9311-F1	D	Chr6_3057772	6	2963058	3285190	0.254316	0.32926	1.35199	LOC_Os06g06370	1	1
CS-PBP-ind-9311-F1	D	Chr6_3057772	6	2963058	3285190	0.254316	0.32926	1.35199	LOC_Os06g06550
CS-PBP-ind-9311-F1	D	Chr6_3057772	6	2963058	3285190	0.254316	0.32926	1.35199	LOC_Os06g06540					NoDiff	P1POD	NoDiff
CS-PBP-ind-9311-F1	D	Chr6_3057772	6	2963058	3285190	0.254316	0.32926	1.35199	LOC_Os06g06530	1			HGW
CS-PBP-ind-9311-F1	D	Chr6_3057772	6	2963058	3285190	0.254316	0.32926	1.35199	LOC_Os06g06770	1							P1HP
CS-PBP-ind-9311-F1	D	Chr6_3057772	6	2963058	3285190	0.254316	0.32926	1.35199	LOC_Os06g06570
CS-PBP-ind-9311-F1	D	Chr6_3057772	6	2963058	3285190	0.254316	0.32926	1.35199	LOC_Os06g06730
CS-PBP-ind-9311-F1	D	Chr6_3057772	6	2963058	3285190	0.254316	0.32926	1.35199	LOC_Os06g06710
CS-PBP-ind-9311-F1	D	Chr6_3057772	6	2963058	3285190	0.254316	0.32926	1.35199	LOC_Os06g06780	1							P1OHP
CS-PBP-ind-9311-F1	D	Chr6_3057772	6	2963058	3285190	0.254316	0.32926	1.35199	LOC_Os06g06700
CS-PBP-ind-9311-F1	D	Chr6_3057772	6	2963058	3285190	0.254316	0.32926	1.35199	LOC_Os06g06880	1				NoDiff	NoDiff	P1PD
CS-PBP-ind-9311-F1	D	Chr6_3057772	6	2963058	3285190	0.254316	0.32926	1.35199	LOC_Os06g06870	1	1
CS-PBP-ind-9311-F1	D	Chr6_3057772	6	2963058	3285190	0.254316	0.32926	1.35199	LOC_Os06g06740
CS-PBP-ind-9311-F1	OD	Chr6_3302280	6	3291344	3312684	0.566233	1.48019	2.99487	LOC_Os06g06970
CS-PBP-ind-9311-F1	OD	Chr6_3302280	6	3291344	3312684	0.566233	1.48019	2.99487	LOC_Os06g06960
CS-PBP-ind-9311-F1	OD	Chr6_3302280	6	3291344	3312684	0.566233	1.48019	2.99487	LOC_Os06g06980	1
CS-PBP-ind-9311-F1	OD	Chr6_3302280	6	3291344	3312684	0.566233	1.48019	2.99487	LOC_Os06g06950
CS-PBP-ind-9311-F1	OD	Chr6_3302280	6	3291344	3312684	0.566233	1.48019	2.99487	LOC_Os06g06940
CS-PBP-ind-9311-F1	OD	Chr7_11961290	7	11512983	12297289	0.453455	-1.31203	-3.06728	LOC_Os07g21980
CS-PBP-ind-9311-F1	OD	Chr7_11961290	7	11512983	12297289	0.453455	-1.31203	-3.06728	LOC_Os07g19530	1				NoDiff	NoDiff	P1PD
CS-PBP-ind-9311-F1	OD	Chr7_11961290	7	11512983	12297289	0.453455	-1.31203	-3.06728	LOC_Os07g21990
CS-PBP-ind-9311-F1	OD	Chr7_12710504	7	12554529	12776411	0.375947	-1.35473	-7.09171	LOC_Os07g22590
CS-PBP-ind-9311-F1	OD	Chr7_12710504	7	12554529	12776411	0.375947	-1.35473	-7.09171	LOC_Os07g22680
CS-PBP-ind-9311-F1	OD	Chr7_12710504	7	12554529	12776411	0.375947	-1.35473	-7.09171	LOC_Os07g22370
CS-PBP-ind-9311-F1	OD	Chr7_12710504	7	12554529	12776411	0.375947	-1.35473	-7.09171	LOC_Os07g22520
CS-PBP-ind-9311-F1	OD	Chr7_12710504	7	12554529	12776411	0.375947	-1.35473	-7.09171	LOC_Os07g22650
CS-PBP-ind-9311-F1	OD	Chr7_12710504	7	12554529	12776411	0.375947	-1.35473	-7.09171	LOC_Os07g22620	1
CS-PBP-ind-9311-F1	OD	Chr7_13749736	7	13649955	14653511	0.12076	-0.899663	-20.2894	LOC_Os07g25490
CS-PBP-ind-9311-F1	OD	Chr7_13749736	7	13649955	14653511	0.12076	-0.899663	-20.2894	LOC_Os07g25340					P1ND	NoDiff	NoDiff
CS-PBP-ind-9311-F1	OD	Chr7_13749736	7	13649955	14653511	0.12076	-0.899663	-20.2894	LOC_Os07g25484
CS-PBP-ind-9311-F1	OD	Chr7_13749736	7	13649955	14653511	0.12076	-0.899663	-20.2894	LOC_Os07g25560
CS-PBP-ind-9311-F1	OD	Chr7_15613314	7	15613304	15613314	0.100922	-0.906236	-9.1026	LOC_Os07g26960
CS-PBP-ind-9311-F1	OD	Chr7_27089310	7	27088911	27089310	0.0817434	0.444297	6.58831	LOC_Os07g45410	1							P2LP
CS-PBP-ind-9311-F1	OD	Chr7_4193404	7	4193404	4196278	0.328984	-1.45348	-4.51988	LOC_Os07g08220
CS-PBP-ind-9311-F1	OD	Chr7_4193404	7	4193404	4196278	0.328984	-1.45348	-4.51988	LOC_Os07g08230
CS-PBP-ind-9311-F1	D	Chr8_14804254	8	14722451	14805705	0.537755	0.650674	1.25877	LOC_Os08g24380
CS-PBP-ind-9311-F1	D	Chr8_14804254	8	14722451	14805705	0.537755	0.650674	1.25877	LOC_Os08g24420	1
CS-PBP-ind-9311-F1	D	Chr8_14804254	8	14722451	14805705	0.537755	0.650674	1.25877	LOC_Os08g24490	1
CS-PBP-ind-9311-F1	D	Chr8_14804254	8	14722451	14805705	0.537755	0.650674	1.25877	LOC_Os08g24520	1
CS-PBP-ind-9311-F1	D	Chr8_14804254	8	14722451	14805705	0.537755	0.650674	1.25877	LOC_Os08g24470
CS-PBP-ind-9311-F1	D	Chr8_14804254	8	14722451	14805705	0.537755	0.650674	1.25877	LOC_Os08g24400	1							P1BLP
CS-PBP-ind-9311-F1	D	Chr8_14804254	8	14722451	14805705	0.537755	0.650674	1.25877	LOC_Os08g24390	1				NoDiff	NoDiff	P2POD
CS-PBP-ind-9311-F1	D	Chr8_14804254	8	14722451	14805705	0.537755	0.650674	1.25877	LOC_Os08g24434					NoDiff	NoDiff	CPOD
CS-PBP-ind-9311-F1	D	Chr8_14804254	8	14722451	14805705	0.537755	0.650674	1.25877	LOC_Os08g24500	1
CS-PBP-ind-9311-F1	D	Chr8_14804254	8	14722451	14805705	0.537755	0.650674	1.25877	LOC_Os08g24410	1							P1LP
CS-PBP-ind-9311-F1	A	Chr8_15086766	8	15068784	15208819	0.493303	0.0872373	0.209171	LOC_Os08g25010	1	1						P1LP
CS-PBP-ind-9311-F1	A	Chr8_15086766	8	15068784	15208819	0.493303	0.0872373	0.209171	LOC_Os08g25060	1	1				P1POD	P1MP	P1HP
CS-PBP-ind-9311-F1	A	Chr8_15086766	8	15068784	15208819	0.493303	0.0872373	0.209171	LOC_Os08g24946	1	1
CS-PBP-ind-9311-F1	A	Chr8_15086766	8	15068784	15208819	0.493303	0.0872373	0.209171	LOC_Os08g24910					CPOD	CPOD	NoDiff
CS-PBP-ind-9311-F1	A	Chr8_15086766	8	15068784	15208819	0.493303	0.0872373	0.209171	LOC_Os08g24980
CS-PBP-ind-9311-F1	A	Chr8_15086766	8	15068784	15208819	0.493303	0.0872373	0.209171	LOC_Os08g24900
CS-PBP-ind-9311-F1	A	Chr8_15086766	8	15068784	15208819	0.493303	0.0872373	0.209171	LOC_Os08g24920
CS-PBP-ind-9311-F1	A	Chr8_15086766	8	15068784	15208819	0.493303	0.0872373	0.209171	LOC_Os08g25050	1	1
CS-PBP-ind-9311-F1	D	Chr8_9194559	8	9176453	9198039	0.451994	0.378164	0.854685	LOC_Os08g15204	1				P1NOD	P2NOD	NoDiff	P1HP
CS-PBP-ind-9311-F1	OD	Chr9_10290845	9	10290796	10374036	0.0876069	1.83658	136.061	LOC_Os09g16940
CS-PBP-ind-9311-F1	OD	Chr9_10290845	9	10290796	10374036	0.0876069	1.83658	136.061	LOC_Os09g16970
CS-PBP-ind-9311-F1	OD	Chr9_10290845	9	10290796	10374036	0.0876069	1.83658	136.061	LOC_Os09g16860
CS-PBP-ind-9311-F1	OD	Chr9_16774989	9	16770201	16780679	0.238207	-1.74504	-7.39745	LOC_Os09g27610	1	1						P2LP
CS-PBP-ind-9311-F1	OD	Chr9_17450696	9	17450696	17450741	0.763842	-2.14722	-2.80634	LOC_Os09g28690	1	1				NoDiff	P1ND	P2LP
CS-PBP-ind-9311-F1	OD	Chr9_2576721	9	2576721	2577118	0.17667	0.979828	6.20296	LOC_Os09g04830
CS-PBP-ind-9311-HV	D	Chr1_31996315	1	31955859	32004049	0.690141	-0.979766	-1.42772	LOC_Os01g55520	1	1
CS-PBP-ind-9311-HV	D	Chr1_31996315	1	31955859	32004049	0.690141	-0.979766	-1.42772	LOC_Os01g55530	1	1
CS-PBP-ind-9311-HV	D	Chr1_31996315	1	31955859	32004049	0.690141	-0.979766	-1.42772	LOC_Os01g55540	1
CS-PBP-ind-9311-HV	OD	Chr1_32913109	1	32470665	32913109	0.64034	-1.05246	-1.66548	LOC_Os01g56940	1	1
CS-PBP-ind-9311-HV	OD	Chr1_32913109	1	32470665	32913109	0.64034	-1.05246	-1.66548	LOC_Os01g56969	1	1
CS-PBP-ind-9311-HV	OD	Chr1_32913109	1	32470665	32913109	0.64034	-1.05246	-1.66548	LOC_Os01g56350	1							P1LP
CS-PBP-ind-9311-HV	OD	Chr1_32913109	1	32470665	32913109	0.64034	-1.05246	-1.66548	LOC_Os01g56800	1				NoDiff	P1POD	NoDiff
CS-PBP-ind-9311-HV	OD	Chr1_32913109	1	32470665	32913109	0.64034	-1.05246	-1.66548	LOC_Os01g56980	1				P1PD	P1PD
CS-PBP-ind-9311-HV	OD	Chr1_32913109	1	32470665	32913109	0.64034	-1.05246	-1.66548	LOC_Os01g56370	1	1						P1HP
CS-PBP-ind-9311-HV	OD	Chr1_32913109	1	32470665	32913109	0.64034	-1.05246	-1.66548	LOC_Os01g56340
CS-PBP-ind-9311-HV	OD	Chr1_32913109	1	32470665	32913109	0.64034	-1.05246	-1.66548	LOC_Os01g56560	1	1
CS-PBP-ind-9311-HV	OD	Chr1_32913109	1	32470665	32913109	0.64034	-1.05246	-1.66548	LOC_Os01g56910	1	1						P2HP
CS-PBP-ind-9311-HV	OD	Chr1_32913109	1	32470665	32913109	0.64034	-1.05246	-1.66548	LOC_Os01g56930	1
CS-PBP-ind-9311-HV	D	Chr1_34486247	1	34468651	34500994	0.495221	-0.615533	-1.26033	LOC_Os01g59610
CS-PBP-ind-9311-HV	D	Chr1_34486247	1	34468651	34500994	0.495221	-0.615533	-1.26033	LOC_Os01g59620	1	1
CS-PBP-ind-9311-HV	D	Chr1_34486247	1	34468651	34500994	0.495221	-0.615533	-1.26033	LOC_Os01g59600	1	1
CS-PBP-ind-9311-HV	D	Chr1_34486247	1	34468651	34500994	0.495221	-0.615533	-1.26033	LOC_Os01g59630	1	1
CS-PBP-ind-9311-HV	D	Chr1_34486247	1	34468651	34500994	0.495221	-0.615533	-1.26033	LOC_Os01g59640
CS-PBP-ind-9311-HV	OD	Chr10_13098113	10	13098113	13098135	0.270681	0.741828	2.74444	LOC_Os10g25320	1							P1BLP
CS-PBP-ind-9311-HV	OD	Chr10_21956826	10	21956826	21959267	0.194079	0.804465	4.35689	LOC_Os10g40840
CS-PBP-ind-9311-HV	OD	Chr10_21956826	10	21956826	21959267	0.194079	0.804465	4.35689	LOC_Os10g40830
CS-PBP-ind-9311-HV	OD	Chr11_19233233	11	19215757	19254853	0.15436	-0.321308	-2.16158	LOC_Os11g32600
CS-PBP-ind-9311-HV	OD	Chr11_19233233	11	19215757	19254853	0.15436	-0.321308	-2.16158	LOC_Os11g32580	1	1
CS-PBP-ind-9311-HV	OD	Chr11_19233233	11	19215757	19254853	0.15436	-0.321308	-2.16158	LOC_Os11g32610
CS-PBP-ind-9311-HV	OD	Chr11_19233233	11	19215757	19254853	0.15436	-0.321308	-2.16158	LOC_Os11g32590
CS-PBP-ind-9311-HV	OD	Chr11_19233233	11	19215757	19254853	0.15436	-0.321308	-2.16158	LOC_Os11g32570
CS-PBP-ind-9311-HV	OD	Chr11_19233233	11	19215757	19254853	0.15436	-0.321308	-2.16158	LOC_Os11g32560	1
CS-PBP-ind-9311-HV	OD	Chr11_28915025	11	28915025	28915036	0.655658	1.03076	1.57264	LOC_Os11g47940
CS-PBP-ind-9311-HV	OD	Chr12_10082238	12	10082223	10082239	0.557823	-1.76827	-3.23234	LOC_Os12g17600	1				NoDiff	NoDiff	P1ND
CS-PBP-ind-9311-HV	OD	Chr12_19554385	12	19534992	19557489	0.409231	-0.692539	-2.46049	LOC_Os12g32390	1	1			P1ND	P1ND	NoDiff	P1LP
CS-PBP-ind-9311-HV	OD	Chr12_19554385	12	19534992	19557489	0.409231	-0.692539	-2.46049	LOC_Os12g32410
CS-PBP-ind-9311-HV	OD	Chr12_19554385	12	19534992	19557489	0.409231	-0.692539	-2.46049	LOC_Os12g32420
CS-PBP-ind-9311-HV	OD	Chr12_19554385	12	19534992	19557489	0.409231	-0.692539	-2.46049	LOC_Os12g32374
CS-PBP-ind-9311-HV	OD	Chr12_19554385	12	19534992	19557489	0.409231	-0.692539	-2.46049	LOC_Os12g32380	1	1						P1OHP
CS-PBP-ind-9311-HV	OD	Chr12_25885866	12	25885866	25886301	0.182705	1.14159	6.36685	LOC_Os12g41790
CS-PBP-ind-9311-HV	OD	Chr12_25885866	12	25885866	25886301	0.182705	1.14159	6.36685	LOC_Os12g41780	1	1
CS-PBP-ind-9311-HV	OD	Chr2_20579151	2	20571491	20579151	0.0638885	-0.791491	-39.0925	LOC_Os02g34390
CS-PBP-ind-9311-HV	OD	Chr2_20579151	2	20571491	20579151	0.0638885	-0.791491	-39.0925	LOC_Os02g34380
CS-PBP-ind-9311-HV	OD	Chr2_22430468	2	22430454	22430468	0.441835	1.02169	2.36471	LOC_Os02g37094	1	1			NoDiff	NoDiff	P1POD
CS-PBP-ind-9311-HV	OD	Chr2_22430468	2	22430454	22430468	0.441835	1.02169	2.36471	LOC_Os02g37100	1	1
CS-PBP-ind-9311-HV	OD	Chr2_33296635	2	33156570	33387695	0.804859	1.98393	2.46494	LOC_Os02g54510	1							P1BLP
CS-PBP-ind-9311-HV	OD	Chr2_33296635	2	33156570	33387695	0.804859	1.98393	2.46494	LOC_Os02g54290
CS-PBP-ind-9311-HV	OD	Chr2_33296635	2	33156570	33387695	0.804859	1.98393	2.46494	LOC_Os02g54280	1				NoDiff		P1PD
CS-PBP-ind-9311-HV	OD	Chr2_33296635	2	33156570	33387695	0.804859	1.98393	2.46494	LOC_Os02g54420
CS-PBP-ind-9311-HV	OD	Chr2_33296635	2	33156570	33387695	0.804859	1.98393	2.46494	LOC_Os02g54500	1	1
CS-PBP-ind-9311-HV	OD	Chr2_33296635	2	33156570	33387695	0.804859	1.98393	2.46494	LOC_Os02g54200	1	1
CS-PBP-ind-9311-HV	OD	Chr2_33296635	2	33156570	33387695	0.804859	1.98393	2.46494	LOC_Os02g54120	1	1			NoDiff	NoDiff	P1ND
CS-PBP-ind-9311-HV	OD	Chr2_33296635	2	33156570	33387695	0.804859	1.98393	2.46494	LOC_Os02g54210
CS-PBP-ind-9311-HV	OD	Chr2_33296635	2	33156570	33387695	0.804859	1.98393	2.46494	LOC_Os02g54130	1				NoDiff	P2ND		P1HP
CS-PBP-ind-9311-HV	OD	Chr3_887451	3	734727	915108	0.0822488	2.19808	27.1547	LOC_Os03g02410	1
CS-PBP-ind-9311-HV	OD	Chr3_887451	3	734727	915108	0.0822488	2.19808	27.1547	LOC_Os03g02190
CS-PBP-ind-9311-HV	OD	Chr3_887451	3	734727	915108	0.0822488	2.19808	27.1547	LOC_Os03g02200	1	1						P1HP
CS-PBP-ind-9311-HV	OD	Chr3_887451	3	734727	915108	0.0822488	2.19808	27.1547	LOC_Os03g02470	1	1
CS-PBP-ind-9311-HV	OD	Chr3_887451	3	734727	915108	0.0822488	2.19808	27.1547	LOC_Os03g02460	1	1	LOC_Os03g02460					P2BLP
CS-PBP-ind-9311-HV	OD	Chr3_887451	3	734727	915108	0.0822488	2.19808	27.1547	LOC_Os03g02330
CS-PBP-ind-9311-HV	OD	Chr4_16014189	4	15945720	16014189	0.196612	-1.2625	-11.8197	LOC_Os04g27060
CS-PBP-ind-9311-HV	OD	Chr4_16014189	4	15945720	16014189	0.196612	-1.2625	-11.8197	LOC_Os04g27070
CS-PBP-ind-9311-HV	OD	Chr4_16014189	4	15945720	16014189	0.196612	-1.2625	-11.8197	LOC_Os04g27080
CS-PBP-ind-9311-HV	OD	Chr4_16014189	4	15945720	16014189	0.196612	-1.2625	-11.8197	LOC_Os04g26960
CS-PBP-ind-9311-HV	OD	Chr4_4748001	4	4405702	4760896	0.498306	0.985581	2.01471	LOC_Os04g08749	1	1
CS-PBP-ind-9311-HV	OD	Chr4_4748001	4	4405702	4760896	0.498306	0.985581	2.01471	LOC_Os04g08600	1	1
CS-PBP-ind-9311-HV	OD	Chr4_6406229	4	6346612	6597051	0.139359	0.538178	21.8088	LOC_Os04g11580
CS-PBP-ind-9311-HV	OD	Chr4_6406229	4	6346612	6597051	0.139359	0.538178	21.8088	LOC_Os04g12010
CS-PBP-ind-9311-HV	OD	Chr4_6406229	4	6346612	6597051	0.139359	0.538178	21.8088	LOC_Os04g11610
CS-PBP-ind-9311-HV	OD	Chr4_6406229	4	6346612	6597051	0.139359	0.538178	21.8088	LOC_Os04g11630
CS-PBP-ind-9311-HV	OD	Chr4_6406229	4	6346612	6597051	0.139359	0.538178	21.8088	LOC_Os04g11600	1
CS-PBP-ind-9311-HV	OD	Chr4_6406229	4	6346612	6597051	0.139359	0.538178	21.8088	LOC_Os04g11680
CS-PBP-ind-9311-HV	OD	Chr4_6406229	4	6346612	6597051	0.139359	0.538178	21.8088	LOC_Os04g11620
CS-PBP-ind-9311-HV	OD	Chr4_6406229	4	6346612	6597051	0.139359	0.538178	21.8088	LOC_Os04g11660
CS-PBP-ind-9311-HV	OD	Chr4_6406229	4	6346612	6597051	0.139359	0.538178	21.8088	LOC_Os04g11590
CS-PBP-ind-9311-HV	OD	Chr5_3972	5	3972	174545	0.0959327	-0.968187	-32.4694	LOC_Os05g01040	1	1
CS-PBP-ind-9311-HV	OD	Chr5_3972	5	3972	174545	0.0959327	-0.968187	-32.4694	LOC_Os05g00990
CS-PBP-ind-9311-HV	OD	Chr5_3972	5	3972	174545	0.0959327	-0.968187	-32.4694	LOC_Os05g01240	1	1
CS-PBP-ind-9311-HV	OD	Chr5_3972	5	3972	174545	0.0959327	-0.968187	-32.4694	LOC_Os05g01080
CS-PBP-ind-9311-HV	OD	Chr5_3972	5	3972	174545	0.0959327	-0.968187	-32.4694	LOC_Os05g01150
CS-PBP-ind-9311-HV	OD	Chr5_3972	5	3972	174545	0.0959327	-0.968187	-32.4694	LOC_Os05g01020	1	1						P2OHP
CS-PBP-ind-9311-HV	OD	Chr5_3972	5	3972	174545	0.0959327	-0.968187	-32.4694	LOC_Os05g00988
CS-PBP-ind-9311-HV	OD	Chr5_3972	5	3972	174545	0.0959327	-0.968187	-32.4694	LOC_Os05g01250
CS-PBP-ind-9311-HV	OD	Chr5_785855	5	768024	790897	0.586658	-1.28315	-2.2125	LOC_Os05g02410	1	1				NoDiff	P1NOD	P1OHP
CS-PBP-ind-9311-HV	OD	Chr5_785855	5	768024	790897	0.586658	-1.28315	-2.2125	LOC_Os05g02370
CS-PBP-ind-9311-HV	OD	Chr5_785855	5	768024	790897	0.586658	-1.28315	-2.2125	LOC_Os05g02360
CS-PBP-ind-9311-HV	OD	Chr5_785855	5	768024	790897	0.586658	-1.28315	-2.2125	LOC_Os05g02390					NoDiff	P1ND	NoDiff
CS-PBP-ind-9311-HV	OD	Chr5_785855	5	768024	790897	0.586658	-1.28315	-2.2125	LOC_Os05g02400	1	1
CS-PBP-ind-9311-HV	OD	Chr6_17101155	6	16999062	17101155	0.112678	0.584872	5.9779	LOC_Os06g29640					P2MP	P2MP	P2MP
CS-PBP-ind-9311-HV	OD	Chr6_17101155	6	16999062	17101155	0.112678	0.584872	5.9779	LOC_Os06g29740
CS-PBP-ind-9311-HV	OD	Chr6_17101155	6	16999062	17101155	0.112678	0.584872	5.9779	LOC_Os06g29710	1	1						P2BLP
CS-PBP-ind-9311-HV	OD	Chr6_17204971	6	17192044	17204971	0.275688	0.614963	2.249	LOC_Os06g29860
CS-PBP-ind-9311-HV	D	Chr6_17232933	6	17232933	17237054	0.574322	0.791058	1.37843	LOC_Os06g29920					NoDiff	NoDiff	CPOD
CS-PBP-ind-9311-HV	D	Chr6_17232933	6	17232933	17237054	0.574322	0.791058	1.37843	LOC_Os06g29930
CS-PBP-ind-9311-HV	D	Chr6_17385643	6	17385643	17389325	0.778411	0.823983	1.09179	LOC_Os06g30140
CS-PBP-ind-9311-HV	OD	Chr6_17456818	6	17455964	17470201	0.552804	0.907204	1.66508	LOC_Os06g30270
CS-PBP-ind-9311-HV	OD	Chr6_17477360	6	17477250	17497020	0.478528	0.827779	1.75168	LOC_Os06g30290
CS-PBP-ind-9311-HV	OD	Chr6_17477360	6	17477250	17497020	0.478528	0.827779	1.75168	LOC_Os06g30300
CS-PBP-ind-9311-HV	OD	Chr6_17477360	6	17477250	17497020	0.478528	0.827779	1.75168	LOC_Os06g30310	1				P1PD	NoDiff	P1POD	P2LP
CS-PBP-ind-9311-HV	OD	Chr6_28481933	6	28481933	28481947	0.0955058	-0.819001	-8.58352	LOC_Os06g46950	1							P1BLP
CS-PBP-ind-9311-HV	OD	Chr6_6978450	6	6975677	6987618	0.553991	-1.06866	-1.97714	LOC_Os06g12780	1	1
CS-PBP-ind-9311-HV	OD	Chr7_12804214	7	11682011	13611004	0.39534	-1.36905	-3.61476	LOC_Os07g22024	1	1
CS-PBP-ind-9311-HV	OD	Chr7_12804214	7	11682011	13611004	0.39534	-1.36905	-3.61476	LOC_Os07g22650
CS-PBP-ind-9311-HV	OD	Chr7_12804214	7	11682011	13611004	0.39534	-1.36905	-3.61476	LOC_Os07g23770	1							P1LP
CS-PBP-ind-9311-HV	OD	Chr7_12804214	7	11682011	13611004	0.39534	-1.36905	-3.61476	LOC_Os07g20520
CS-PBP-ind-9311-HV	OD	Chr7_12804214	7	11682011	13611004	0.39534	-1.36905	-3.61476	LOC_Os07g22720	1
CS-PBP-ind-9311-HV	OD	Chr7_12804214	7	11682011	13611004	0.39534	-1.36905	-3.61476	LOC_Os07g20260
CS-PBP-ind-9311-HV	OD	Chr7_12804214	7	11682011	13611004	0.39534	-1.36905	-3.61476	LOC_Os07g22700	1	1			NoDiff	NoDiff	P1PD
CS-PBP-ind-9311-HV	OD	Chr7_12804214	7	11682011	13611004	0.39534	-1.36905	-3.61476	LOC_Os07g22129
CS-PBP-ind-9311-HV	OD	Chr7_12804214	7	11682011	13611004	0.39534	-1.36905	-3.61476	LOC_Os07g22590
CS-PBP-ind-9311-HV	OD	Chr7_12804214	7	11682011	13611004	0.39534	-1.36905	-3.61476	LOC_Os07g22710	1	1
CS-PBP-ind-9311-HV	OD	Chr7_12804214	7	11682011	13611004	0.39534	-1.36905	-3.61476	LOC_Os07g22810
CS-PBP-ind-9311-HV	OD	Chr7_12804214	7	11682011	13611004	0.39534	-1.36905	-3.61476	LOC_Os07g23380
CS-PBP-ind-9311-HV	OD	Chr7_12804214	7	11682011	13611004	0.39534	-1.36905	-3.61476	LOC_Os07g20570
CS-PBP-ind-9311-HV	OD	Chr7_4432029	7	4432029	4432043	0.467896	-1.54878	-3.33659	LOC_Os07g08590
CS-PBP-ind-9311-HV	OD	Chr7_4432029	7	4432029	4432043	0.467896	-1.54878	-3.33659	LOC_Os07g08600
CS-PBP-ind-9311-HV	OD	Chr8_10260668	8	10207869	11287325	0.365783	0.686878	1.95496	LOC_Os08g16760
CS-PBP-ind-9311-HV	OD	Chr8_10260668	8	10207869	11287325	0.365783	0.686878	1.95496	LOC_Os08g16840	1
CS-PBP-ind-9311-HV	OD	Chr8_10260668	8	10207869	11287325	0.365783	0.686878	1.95496	LOC_Os08g16990
CS-PBP-ind-9311-HV	OD	Chr8_10260668	8	10207869	11287325	0.365783	0.686878	1.95496	LOC_Os08g16680
CS-PBP-ind-9311-HV	OD	Chr8_10260668	8	10207869	11287325	0.365783	0.686878	1.95496	LOC_Os08g16770
CS-PBP-ind-9311-HV	OD	Chr8_10260668	8	10207869	11287325	0.365783	0.686878	1.95496	LOC_Os08g16970
CS-PBP-ind-9311-HV	OD	Chr8_10260668	8	10207869	11287325	0.365783	0.686878	1.95496	LOC_Os08g17330
CS-PBP-ind-9311-HV	OD	Chr8_10260668	8	10207869	11287325	0.365783	0.686878	1.95496	LOC_Os08g16780	1	1			NoDiff	NoDiff	P1NOD
CS-PBP-ind-9311-HV	OD	Chr8_10260668	8	10207869	11287325	0.365783	0.686878	1.95496	LOC_Os08g17670
CS-PBP-ind-9311-HV	OD	Chr8_10260668	8	10207869	11287325	0.365783	0.686878	1.95496	LOC_Os08g16690
CS-PBP-ind-9311-HV	OD	Chr8_10260668	8	10207869	11287325	0.365783	0.686878	1.95496	LOC_Os08g16750
CS-PBP-ind-9311-HV	OD	Chr8_12776550	8	11718073	12776550	0.411718	1.02163	2.8432	LOC_Os08g19750					NoDiff	P2POD	P2ND
CS-PBP-ind-9311-HV	OD	Chr8_12776550	8	11718073	12776550	0.411718	1.02163	2.8432	LOC_Os08g19600
CS-PBP-ind-9311-HV	OD	Chr8_12776550	8	11718073	12776550	0.411718	1.02163	2.8432	LOC_Os08g21420
CS-PBP-ind-9311-HV	OD	Chr8_12776550	8	11718073	12776550	0.411718	1.02163	2.8432	LOC_Os08g21280
CS-PBP-ind-9311-HV	OD	Chr8_12776550	8	11718073	12776550	0.411718	1.02163	2.8432	LOC_Os08g21434
CS-PBP-ind-9311-HV	OD	Chr8_9825662	8	9825662	10157438	0.270125	0.453093	1.80936	LOC_Os08g16470	1							P2LP
CS-PBP-ind-9311-HV	OD	Chr8_9825662	8	9825662	10157438	0.270125	0.453093	1.80936	LOC_Os08g16490					CPOD		NoDiff
CS-PBP-ind-9311-HV	OD	Chr8_9825662	8	9825662	10157438	0.270125	0.453093	1.80936	LOC_Os08g16540
CS-PBP-ind-9311-HV	OD	Chr8_9825662	8	9825662	10157438	0.270125	0.453093	1.80936	LOC_Os08g16559
CS-PBP-ind-9311-HV	OD	Chr8_9825662	8	9825662	10157438	0.270125	0.453093	1.80936	LOC_Os08g16480	1
CS-PBP-ind-9311-HV	OD	Chr8_9825662	8	9825662	10157438	0.270125	0.453093	1.80936	LOC_Os08g16230
CS-PBP-ind-9311-HV	OD	Chr8_9825662	8	9825662	10157438	0.270125	0.453093	1.80936	LOC_Os08g16120	1	1
CS-PBP-ind-9311-HV	OD	Chr8_9825662	8	9825662	10157438	0.270125	0.453093	1.80936	LOC_Os08g16500
CS-PBP-ind-9311-HV	OD	Chr9_16780648	9	16777395	16780679	0.227069	-1.68632	-9.86934	LOC_Os09g27610	1	1						P2LP
CS-PBP-ind-9311-HV	OD	Chr9_16826002	9	16813807	17193343	0.571328	-1.65684	-2.91618	LOC_Os09g28170
CS-PBP-ind-9311-HV	OD	Chr9_16826002	9	16813807	17193343	0.571328	-1.65684	-2.91618	LOC_Os09g28180
CS-PBP-ind-9311-HV	OD	Chr9_16826002	9	16813807	17193343	0.571328	-1.65684	-2.91618	LOC_Os09g28310	1	1				NoDiff	P2ND	P2LP
CS-PBP-ind-9311-HV	OD	Chr9_16826002	9	16813807	17193343	0.571328	-1.65684	-2.91618	LOC_Os09g28140
CS-PBP-ind-9311-HV	OD	Chr9_16826002	9	16813807	17193343	0.571328	-1.65684	-2.91618	LOC_Os09g27940					NoDiff	NoDiff	P1ND
CS-PBP-ind-9311-HV	OD	Chr9_16826002	9	16813807	17193343	0.571328	-1.65684	-2.91618	LOC_Os09g27890	1
CS-PBP-ind-9311-HV	OD	Chr9_16826002	9	16813807	17193343	0.571328	-1.65684	-2.91618	LOC_Os09g28150
CS-PBP-ind-9311-HV	OD	Chr9_18905903	9	18905024	18908967	0.230675	-1.29632	-5.63195	LOC_Os09g31420
CS-PBP-ind-9311-HV	OD	Chr9_18905903	9	18905024	18908967	0.230675	-1.29632	-5.63195	LOC_Os09g31430	1							P1OHP
CS-PBP-ind-9311-HV	OD	Chr9_638940	9	256616	643527	0.144504	-0.538027	-3.72327	LOC_Os09g01950
CS-PBP-ind-9311-HV	OD	Chr9_638940	9	256616	643527	0.144504	-0.538027	-3.72327	LOC_Os09g01860
CS-PBP-ind-9311-HV	OD	Chr9_638940	9	256616	643527	0.144504	-0.538027	-3.72327	LOC_Os09g01300
CS-PBP-ind-9311-HV	D	Chr9_6848773	9	6831229	6848773	0.386681	-0.244812	-0.617494	LOC_Os09g12110	1
CS-PBP-ind-9311-HV	D	Chr9_6848773	9	6831229	6848773	0.386681	-0.244812	-0.617494	LOC_Os09g12090
CS-PBP-ind-9311-HV	D	Chr9_6848773	9	6831229	6848773	0.386681	-0.244812	-0.617494	LOC_Os09g12100					P1ND	NoDiff	NoDiff
CS-PBP-ind-9311-HV	D	Chr9_724012	9	724011	797259	0.449556	-0.364173	-0.810089	LOC_Os09g02120
CS-PBP-ind-9311-HV	D	Chr9_724012	9	724011	797259	0.449556	-0.364173	-0.810089	LOC_Os09g02100	1
CS-PBP-ind-9311-HV	OD	Chr9_7939344	9	7939344	7939647	0.267869	0.75163	2.85136	LOC_Os09g13630	1	1
CS-PBP-ind-Nip-F1	OD	Chr1_34226495	1	33800140	34332079	0.81302	-1.37306	-1.72153	LOC_Os01g59340	1				P1PD	NoDiff	NoDiff
CS-PBP-ind-Nip-F1	OD	Chr1_34226495	1	33800140	34332079	0.81302	-1.37306	-1.72153	LOC_Os01g58650
CS-PBP-ind-Nip-F1	OD	Chr1_34226495	1	33800140	34332079	0.81302	-1.37306	-1.72153	LOC_Os01g59265
CS-PBP-ind-Nip-F1	OD	Chr1_34226495	1	33800140	34332079	0.81302	-1.37306	-1.72153	LOC_Os01g59320
CS-PBP-ind-Nip-F1	OD	Chr1_34226495	1	33800140	34332079	0.81302	-1.37306	-1.72153	LOC_Os01g59040
CS-PBP-ind-Nip-F1	OD	Chr1_35323645	1	34838682	35461654	0.925193	-2.23644	-3.79677	LOC_Os01g60230	1
CS-PBP-ind-Nip-F1	OD	Chr1_35323645	1	34838682	35461654	0.925193	-2.23644	-3.79677	LOC_Os01g61250	1	1			NoDiff	NoDiff	P1POD
CS-PBP-ind-Nip-F1	OD	Chr1_35323645	1	34838682	35461654	0.925193	-2.23644	-3.79677	LOC_Os01g60600
CS-PBP-ind-Nip-F1	OD	Chr1_35323645	1	34838682	35461654	0.925193	-2.23644	-3.79677	LOC_Os01g61044
CS-PBP-ind-Nip-F1	OD	Chr1_37076608	1	36525767	38395424	0.364664	1.15074	5.28761	LOC_Os01g66020	1	1
CS-PBP-ind-Nip-F1	OD	Chr1_37076608	1	36525767	38395424	0.364664	1.15074	5.28761	LOC_Os01g64080	1				P2PD	NoDiff	NoDiff
CS-PBP-ind-Nip-F1	OD	Chr1_37076608	1	36525767	38395424	0.364664	1.15074	5.28761	LOC_Os01g64830
CS-PBP-ind-Nip-F1	OD	Chr1_37076608	1	36525767	38395424	0.364664	1.15074	5.28761	LOC_Os01g63050	1	1			NoDiff	P1PD
CS-PBP-ind-Nip-F1	OD	Chr1_37076608	1	36525767	38395424	0.364664	1.15074	5.28761	LOC_Os01g64770	1	1
CS-PBP-ind-Nip-F1	OD	Chr1_37076608	1	36525767	38395424	0.364664	1.15074	5.28761	LOC_Os01g63410	1
CS-PBP-ind-Nip-F1	OD	Chr1_37076608	1	36525767	38395424	0.364664	1.15074	5.28761	LOC_Os01g63600					CPOD	P2PD	NoDiff
CS-PBP-ind-Nip-F1	OD	Chr1_37076608	1	36525767	38395424	0.364664	1.15074	5.28761	LOC_Os01g63900	1							P2BLP
CS-PBP-ind-Nip-F1	OD	Chr1_37076608	1	36525767	38395424	0.364664	1.15074	5.28761	LOC_Os01g64790
CS-PBP-ind-Nip-F1	OD	Chr1_37076608	1	36525767	38395424	0.364664	1.15074	5.28761	LOC_Os01g64620
CS-PBP-ind-Nip-F1	OD	Chr1_37076608	1	36525767	38395424	0.364664	1.15074	5.28761	LOC_Os01g64200
CS-PBP-ind-Nip-F1	OD	Chr1_37076608	1	36525767	38395424	0.364664	1.15074	5.28761	LOC_Os01g63400	1	1
CS-PBP-ind-Nip-F1	D	Chr1_6322198	1	5178130	6568005	0.532806	0.490983	1.23976	LOC_Os01g11800
CS-PBP-ind-Nip-F1	D	Chr1_6322198	1	5178130	6568005	0.532806	0.490983	1.23976	LOC_Os01g11840
CS-PBP-ind-Nip-F1	D	Chr1_6322198	1	5178130	6568005	0.532806	0.490983	1.23976	LOC_Os01g11460
CS-PBP-ind-Nip-F1	D	Chr1_6322198	1	5178130	6568005	0.532806	0.490983	1.23976	LOC_Os01g11660
CS-PBP-ind-Nip-F1	D	Chr1_6322198	1	5178130	6568005	0.532806	0.490983	1.23976	LOC_Os01g11670
CS-PBP-ind-Nip-F1	D	Chr1_6322198	1	5178130	6568005	0.532806	0.490983	1.23976	LOC_Os01g11740	1	1
CS-PBP-ind-Nip-F1	D	Chr1_6322198	1	5178130	6568005	0.532806	0.490983	1.23976	LOC_Os01g11860
CS-PBP-ind-Nip-F1	D	Chr1_6322198	1	5178130	6568005	0.532806	0.490983	1.23976	LOC_Os01g11770					P2ND	NoDiff
CS-PBP-ind-Nip-F1	D	Chr1_6322198	1	5178130	6568005	0.532806	0.490983	1.23976	LOC_Os01g12070
CS-PBP-ind-Nip-F1	D	Chr1_6322198	1	5178130	6568005	0.532806	0.490983	1.23976	LOC_Os01g11390
CS-PBP-ind-Nip-F1	D	Chr1_6322198	1	5178130	6568005	0.532806	0.490983	1.23976	LOC_Os01g11230	1							P1HP
CS-PBP-ind-Nip-F1	D	Chr1_6322198	1	5178130	6568005	0.532806	0.490983	1.23976	LOC_Os01g11680
CS-PBP-ind-Nip-F1	D	Chr1_6322198	1	5178130	6568005	0.532806	0.490983	1.23976	LOC_Os01g11760	1	1
CS-PBP-ind-Nip-F1	D	Chr1_6322198	1	5178130	6568005	0.532806	0.490983	1.23976	LOC_Os01g11952	1	1						P1BLP
CS-PBP-ind-Nip-F1	D	Chr1_6322198	1	5178130	6568005	0.532806	0.490983	1.23976	LOC_Os01g09960
CS-PBP-ind-Nip-F1	D	Chr1_6322198	1	5178130	6568005	0.532806	0.490983	1.23976	LOC_Os01g11700
CS-PBP-ind-Nip-F1	D	Chr1_6322198	1	5178130	6568005	0.532806	0.490983	1.23976	LOC_Os01g11970	1	1
CS-PBP-ind-Nip-F1	D	Chr1_6322198	1	5178130	6568005	0.532806	0.490983	1.23976	LOC_Os01g11780	1	1
CS-PBP-ind-Nip-F1	D	Chr1_6322198	1	5178130	6568005	0.532806	0.490983	1.23976	LOC_Os01g11710	1	1
CS-PBP-ind-Nip-F1	D	Chr1_6322198	1	5178130	6568005	0.532806	0.490983	1.23976	LOC_Os01g12000						CPOD	NoDiff
CS-PBP-ind-Nip-F1	D	Chr1_6322198	1	5178130	6568005	0.532806	0.490983	1.23976	LOC_Os01g11900	1	1						P1BLP
CS-PBP-ind-Nip-F1	D	Chr1_6322198	1	5178130	6568005	0.532806	0.490983	1.23976	LOC_Os01g11910
CS-PBP-ind-Nip-F1	D	Chr1_6322198	1	5178130	6568005	0.532806	0.490983	1.23976	LOC_Os01g11690
CS-PBP-ind-Nip-F1	D	Chr1_6322198	1	5178130	6568005	0.532806	0.490983	1.23976	LOC_Os01g11550	1	1						P1OHP
CS-PBP-ind-Nip-F1	D	Chr1_6322198	1	5178130	6568005	0.532806	0.490983	1.23976	LOC_Os01g11520
CS-PBP-ind-Nip-F1	D	Chr1_6322198	1	5178130	6568005	0.532806	0.490983	1.23976	LOC_Os01g11960	1	1
CS-PBP-ind-Nip-F1	D	Chr1_6322198	1	5178130	6568005	0.532806	0.490983	1.23976	LOC_Os01g11620
CS-PBP-ind-Nip-F1	D	Chr1_6322198	1	5178130	6568005	0.532806	0.490983	1.23976	LOC_Os01g11160					NoDiff	P1PD	NoDiff
CS-PBP-ind-Nip-F1	D	Chr1_6322198	1	5178130	6568005	0.532806	0.490983	1.23976	LOC_Os01g11570
CS-PBP-ind-Nip-F1	D	Chr1_6322198	1	5178130	6568005	0.532806	0.490983	1.23976	LOC_Os01g11510
CS-PBP-ind-Nip-F1	D	Chr1_6322198	1	5178130	6568005	0.532806	0.490983	1.23976	LOC_Os01g10300
CS-PBP-ind-Nip-F1	D	Chr1_6322198	1	5178130	6568005	0.532806	0.490983	1.23976	LOC_Os01g11790
CS-PBP-ind-Nip-F1	D	Chr1_6322198	1	5178130	6568005	0.532806	0.490983	1.23976	LOC_Os01g11920	1	1			P2PD		NoDiff	P1BLP
CS-PBP-ind-Nip-F1	D	Chr1_6322198	1	5178130	6568005	0.532806	0.490983	1.23976	LOC_Os01g11720
CS-PBP-ind-Nip-F1	D	Chr1_6322198	1	5178130	6568005	0.532806	0.490983	1.23976	LOC_Os01g11730
CS-PBP-ind-Nip-F1	D	Chr1_6322198	1	5178130	6568005	0.532806	0.490983	1.23976	LOC_Os01g10400	1							P1HP
CS-PBP-ind-Nip-F1	D	Chr1_6322198	1	5178130	6568005	0.532806	0.490983	1.23976	LOC_Os01g10290	1							P2HP
CS-PBP-ind-Nip-F1	D	Chr1_6322198	1	5178130	6568005	0.532806	0.490983	1.23976	LOC_Os01g11946	1							P2LP
CS-PBP-ind-Nip-F1	D	Chr1_6322198	1	5178130	6568005	0.532806	0.490983	1.23976	LOC_Os01g11360
CS-PBP-ind-Nip-F1	D	Chr1_6322198	1	5178130	6568005	0.532806	0.490983	1.23976	LOC_Os01g11500
CS-PBP-ind-Nip-F1	D	Chr1_6322198	1	5178130	6568005	0.532806	0.490983	1.23976	LOC_Os01g11850
CS-PBP-ind-Nip-F1	D	Chr1_6322198	1	5178130	6568005	0.532806	0.490983	1.23976	LOC_Os01g11704
CS-PBP-ind-Nip-F1	D	Chr1_6322198	1	5178130	6568005	0.532806	0.490983	1.23976	LOC_Os01g11750
CS-PBP-ind-Nip-F1	OD	Chr10_19649352	10	19599025	19769484	0.311898	0.549114	1.97138	LOC_Os10g36880	1	1
CS-PBP-ind-Nip-F1	OD	Chr10_19649352	10	19599025	19769484	0.311898	0.549114	1.97138	LOC_Os10g36626	1							P2HP
CS-PBP-ind-Nip-F1	OD	Chr10_2091852	10	1854242	2101878	0.253913	-0.607307	-3.13063	LOC_Os10g04250
CS-PBP-ind-Nip-F1	OD	Chr10_2091852	10	1854242	2101878	0.253913	-0.607307	-3.13063	LOC_Os10g04450
CS-PBP-ind-Nip-F1	OD	Chr10_2091852	10	1854242	2101878	0.253913	-0.607307	-3.13063	LOC_Os10g04460
CS-PBP-ind-Nip-F1	OD	Chr10_2091852	10	1854242	2101878	0.253913	-0.607307	-3.13063	LOC_Os10g04429
CS-PBP-ind-Nip-F1	OD	Chr10_2091852	10	1854242	2101878	0.253913	-0.607307	-3.13063	LOC_Os10g04210
CS-PBP-ind-Nip-F1	OD	Chr11_21417988	11	21387193	21465261	0.358593	-2.18256	-7.50664	LOC_Os11g36380	1
CS-PBP-ind-Nip-F1	OD	Chr11_21417988	11	21387193	21465261	0.358593	-2.18256	-7.50664	LOC_Os11g36400
CS-PBP-ind-Nip-F1	OD	Chr11_21417988	11	21387193	21465261	0.358593	-2.18256	-7.50664	LOC_Os11g36320
CS-PBP-ind-Nip-F1	OD	Chr11_21417988	11	21387193	21465261	0.358593	-2.18256	-7.50664	LOC_Os11g36390	1	1			NoDiff	P2POD	NoDiff	P1BLP
CS-PBP-ind-Nip-F1	D	Chr11_22251504	11	22051739	22255841	0.974625	-0.534772	-0.446641	LOC_Os11g37350
CS-PBP-ind-Nip-F1	D	Chr11_22251504	11	22051739	22255841	0.974625	-0.534772	-0.446641	LOC_Os11g37360
CS-PBP-ind-Nip-F1	D	Chr11_22251504	11	22051739	22255841	0.974625	-0.534772	-0.446641	LOC_Os11g37380
CS-PBP-ind-Nip-F1	OD	Chr12_20916256	12	20731941	20917366	0.428725	1.24015	3.82611	LOC_Os12g34200
CS-PBP-ind-Nip-F1	OD	Chr12_20916256	12	20731941	20917366	0.428725	1.24015	3.82611	LOC_Os12g34210
CS-PBP-ind-Nip-F1	OD	Chr12_3469798	12	3251311	4108993	0.478558	1.54311	3.40939	LOC_Os12g07060	1	1
CS-PBP-ind-Nip-F1	OD	Chr12_3469798	12	3251311	4108993	0.478558	1.54311	3.40939	LOC_Os12g06890	1	1						P1BLP
CS-PBP-ind-Nip-F1	OD	Chr12_3469798	12	3251311	4108993	0.478558	1.54311	3.40939	LOC_Os12g06760
CS-PBP-ind-Nip-F1	OD	Chr12_3469798	12	3251311	4108993	0.478558	1.54311	3.40939	LOC_Os12g07430
CS-PBP-ind-Nip-F1	OD	Chr12_3469798	12	3251311	4108993	0.478558	1.54311	3.40939	LOC_Os12g07230	1
CS-PBP-ind-Nip-F1	OD	Chr12_3469798	12	3251311	4108993	0.478558	1.54311	3.40939	LOC_Os12g06780	1	1						P1LP
CS-PBP-ind-Nip-F1	OD	Chr12_3469798	12	3251311	4108993	0.478558	1.54311	3.40939	LOC_Os12g07300	1	1				P2POD
CS-PBP-ind-Nip-F1	OD	Chr12_3469798	12	3251311	4108993	0.478558	1.54311	3.40939	LOC_Os12g06980	1	1						P1BLP
CS-PBP-ind-Nip-F1	OD	Chr12_3469798	12	3251311	4108993	0.478558	1.54311	3.40939	LOC_Os12g07450	1	1						P1LP
CS-PBP-ind-Nip-F1	OD	Chr12_3469798	12	3251311	4108993	0.478558	1.54311	3.40939	LOC_Os12g07190	1	1						P2HP
CS-PBP-ind-Nip-F1	OD	Chr12_3469798	12	3251311	4108993	0.478558	1.54311	3.40939	LOC_Os12g07140	1				NoDiff		P1ND
CS-PBP-ind-Nip-F1	OD	Chr12_3469798	12	3251311	4108993	0.478558	1.54311	3.40939	LOC_Os12g06960
CS-PBP-ind-Nip-F1	OD	Chr12_3469798	12	3251311	4108993	0.478558	1.54311	3.40939	LOC_Os12g07380	1							P2HP
CS-PBP-ind-Nip-F1	OD	Chr12_3469798	12	3251311	4108993	0.478558	1.54311	3.40939	LOC_Os12g06740
CS-PBP-ind-Nip-F1	OD	Chr12_3469798	12	3251311	4108993	0.478558	1.54311	3.40939	LOC_Os12g07350	1	1			NoDiff	P1POD	NoDiff
CS-PBP-ind-Nip-F1	OD	Chr12_3469798	12	3251311	4108993	0.478558	1.54311	3.40939	LOC_Os12g07240
CS-PBP-ind-Nip-F1	OD	Chr12_3469798	12	3251311	4108993	0.478558	1.54311	3.40939	LOC_Os12g06810	1	1
CS-PBP-ind-Nip-F1	OD	Chr12_3469798	12	3251311	4108993	0.478558	1.54311	3.40939	LOC_Os12g07370	1							P2HP
CS-PBP-ind-Nip-F1	OD	Chr12_3469798	12	3251311	4108993	0.478558	1.54311	3.40939	LOC_Os12g07210
CS-PBP-ind-Nip-F1	OD	Chr12_3469798	12	3251311	4108993	0.478558	1.54311	3.40939	LOC_Os12g07280
CS-PBP-ind-Nip-F1	OD	Chr12_3469798	12	3251311	4108993	0.478558	1.54311	3.40939	LOC_Os12g07220	1
CS-PBP-ind-Nip-F1	OD	Chr12_3469798	12	3251311	4108993	0.478558	1.54311	3.40939	LOC_Os12g07110	1							P1LP
CS-PBP-ind-Nip-F1	OD	Chr12_3469798	12	3251311	4108993	0.478558	1.54311	3.40939	LOC_Os12g06900
CS-PBP-ind-Nip-F1	OD	Chr12_3469798	12	3251311	4108993	0.478558	1.54311	3.40939	LOC_Os12g06970
CS-PBP-ind-Nip-F1	OD	Chr12_3469798	12	3251311	4108993	0.478558	1.54311	3.40939	LOC_Os12g06790
CS-PBP-ind-Nip-F1	OD	Chr12_3469798	12	3251311	4108993	0.478558	1.54311	3.40939	LOC_Os12g07490
CS-PBP-ind-Nip-F1	OD	Chr12_3469798	12	3251311	4108993	0.478558	1.54311	3.40939	LOC_Os12g07150	1
CS-PBP-ind-Nip-F1	OD	Chr12_3469798	12	3251311	4108993	0.478558	1.54311	3.40939	LOC_Os12g06910	1	1
CS-PBP-ind-Nip-F1	OD	Chr12_3469798	12	3251311	4108993	0.478558	1.54311	3.40939	LOC_Os12g07480	1
CS-PBP-ind-Nip-F1	OD	Chr12_3469798	12	3251311	4108993	0.478558	1.54311	3.40939	LOC_Os12g07260	1	1
CS-PBP-ind-Nip-F1	OD	Chr12_3469798	12	3251311	4108993	0.478558	1.54311	3.40939	LOC_Os12g07180	1
CS-PBP-ind-Nip-F1	OD	Chr12_3469798	12	3251311	4108993	0.478558	1.54311	3.40939	LOC_Os12g07020	1
CS-PBP-ind-Nip-F1	OD	Chr12_3469798	12	3251311	4108993	0.478558	1.54311	3.40939	LOC_Os12g07160	1	1
CS-PBP-ind-Nip-F1	OD	Chr12_3469798	12	3251311	4108993	0.478558	1.54311	3.40939	LOC_Os12g07200
CS-PBP-ind-Nip-F1	OD	Chr12_3469798	12	3251311	4108993	0.478558	1.54311	3.40939	LOC_Os12g06870	1							P2LP
CS-PBP-ind-Nip-F1	OD	Chr12_3469798	12	3251311	4108993	0.478558	1.54311	3.40939	LOC_Os12g06940
CS-PBP-ind-Nip-F1	OD	Chr12_3469798	12	3251311	4108993	0.478558	1.54311	3.40939	LOC_Os12g07170	1
CS-PBP-ind-Nip-F1	OD	Chr12_3469798	12	3251311	4108993	0.478558	1.54311	3.40939	LOC_Os12g06990
CS-PBP-ind-Nip-F1	OD	Chr12_3469798	12	3251311	4108993	0.478558	1.54311	3.40939	LOC_Os12g07030
CS-PBP-ind-Nip-F1	OD	Chr12_3469798	12	3251311	4108993	0.478558	1.54311	3.40939	LOC_Os12g07050	1	1			P1NOD	NoDiff	NoDiff
CS-PBP-ind-Nip-F1	OD	Chr12_3469798	12	3251311	4108993	0.478558	1.54311	3.40939	LOC_Os12g06700
CS-PBP-ind-Nip-F1	OD	Chr12_3469798	12	3251311	4108993	0.478558	1.54311	3.40939	LOC_Os12g07250
CS-PBP-ind-Nip-F1	OD	Chr12_3469798	12	3251311	4108993	0.478558	1.54311	3.40939	LOC_Os12g06750
CS-PBP-ind-Nip-F1	OD	Chr12_3469798	12	3251311	4108993	0.478558	1.54311	3.40939	LOC_Os12g07290
CS-PBP-ind-Nip-F1	OD	Chr12_3469798	12	3251311	4108993	0.478558	1.54311	3.40939	LOC_Os12g07360
CS-PBP-ind-Nip-F1	OD	Chr12_3469798	12	3251311	4108993	0.478558	1.54311	3.40939	LOC_Os12g06950
CS-PBP-ind-Nip-F1	OD	Chr12_3469798	12	3251311	4108993	0.478558	1.54311	3.40939	LOC_Os12g07120
CS-PBP-ind-Nip-F1	OD	Chr12_3469798	12	3251311	4108993	0.478558	1.54311	3.40939	LOC_Os12g07100
CS-PBP-ind-Nip-F1	OD	Chr12_3469798	12	3251311	4108993	0.478558	1.54311	3.40939	LOC_Os12g06800	1	1
CS-PBP-ind-Nip-F1	OD	Chr12_3469798	12	3251311	4108993	0.478558	1.54311	3.40939	LOC_Os12g06930	1	1
CS-PBP-ind-Nip-F1	OD	Chr12_3469798	12	3251311	4108993	0.478558	1.54311	3.40939	LOC_Os12g07310
CS-PBP-ind-Nip-F1	OD	Chr12_3469798	12	3251311	4108993	0.478558	1.54311	3.40939	LOC_Os12g07070
CS-PBP-ind-Nip-F1	OD	Chr12_3469798	12	3251311	4108993	0.478558	1.54311	3.40939	LOC_Os12g07340
CS-PBP-ind-Nip-F1	OD	Chr12_3469798	12	3251311	4108993	0.478558	1.54311	3.40939	LOC_Os12g07460
CS-PBP-ind-Nip-F1	OD	Chr12_3469798	12	3251311	4108993	0.478558	1.54311	3.40939	LOC_Os12g06920
CS-PBP-ind-Nip-F1	OD	Chr12_3469798	12	3251311	4108993	0.478558	1.54311	3.40939	LOC_Os12g06850	1					NoDiff	P1ND	P1HP
CS-PBP-ind-Nip-F1	OD	Chr12_3469798	12	3251311	4108993	0.478558	1.54311	3.40939	LOC_Os12g07440
CS-PBP-ind-Nip-F1	OD	Chr12_3469798	12	3251311	4108993	0.478558	1.54311	3.40939	LOC_Os12g07000
CS-PBP-ind-Nip-F1	OD	Chr12_3469798	12	3251311	4108993	0.478558	1.54311	3.40939	LOC_Os12g07270
CS-PBP-ind-Nip-F1	OD	Chr12_3469798	12	3251311	4108993	0.478558	1.54311	3.40939	LOC_Os12g07390	1	1
CS-PBP-ind-Nip-F1	OD	Chr12_3469798	12	3251311	4108993	0.478558	1.54311	3.40939	LOC_Os12g06770
CS-PBP-ind-Nip-F1	OD	Chr12_3469798	12	3251311	4108993	0.478558	1.54311	3.40939	LOC_Os12g07080
CS-PBP-ind-Nip-F1	OD	Chr12_3469798	12	3251311	4108993	0.478558	1.54311	3.40939	LOC_Os12g07420					P1ND
CS-PBP-ind-Nip-F1	OD	Chr12_3469798	12	3251311	4108993	0.478558	1.54311	3.40939	LOC_Os12g06680					NoDiff	NoDiff	CPOD
CS-PBP-ind-Nip-F1	OD	Chr12_3469798	12	3251311	4108993	0.478558	1.54311	3.40939	LOC_Os12g07010	1	1						P2BLP
CS-PBP-ind-Nip-F1	OD	Chr12_3469798	12	3251311	4108993	0.478558	1.54311	3.40939	LOC_Os12g06820
CS-PBP-ind-Nip-F1	OD	Chr12_3469798	12	3251311	4108993	0.478558	1.54311	3.40939	LOC_Os12g06840
CS-PBP-ind-Nip-F1	OD	Chr12_3469798	12	3251311	4108993	0.478558	1.54311	3.40939	LOC_Os12g06690	1
CS-PBP-ind-Nip-F1	OD	Chr12_3469798	12	3251311	4108993	0.478558	1.54311	3.40939	LOC_Os12g06830
CS-PBP-ind-Nip-F1	OD	Chr12_453427	12	447548	458107	0.246963	1.45602	5.99078	LOC_Os12g01744	1
CS-PBP-ind-Nip-F1	D	Chr2_20774611	2	20740278	20817976	0.495476	0.53494	1.20413	LOC_Os02g34600	1							P1LP
CS-PBP-ind-Nip-F1	D	Chr2_20774611	2	20740278	20817976	0.495476	0.53494	1.20413	LOC_Os02g34630	1	1			NoDiff	NoDiff	P1NOD
CS-PBP-ind-Nip-F1	D	Chr2_20774611	2	20740278	20817976	0.495476	0.53494	1.20413	LOC_Os02g34590	1	1
CS-PBP-ind-Nip-F1	D	Chr2_20774611	2	20740278	20817976	0.495476	0.53494	1.20413	LOC_Os02g34670
CS-PBP-ind-Nip-F1	D	Chr2_20774611	2	20740278	20817976	0.495476	0.53494	1.20413	LOC_Os02g34640
CS-PBP-ind-Nip-F1	D	Chr2_24569917	2	24568673	25268274	1.76677	1.16628	0.747379	LOC_Os02g40510	1	1			P1POD	NoDiff		P2LP
CS-PBP-ind-Nip-F1	OD	Chr2_32840863	2	32113837	33964902	0.481326	0.984626	1.96012	LOC_Os02g52910
CS-PBP-ind-Nip-F1	OD	Chr2_32840863	2	32113837	33964902	0.481326	0.984626	1.96012	LOC_Os02g52980
CS-PBP-ind-Nip-F1	OD	Chr2_32840863	2	32113837	33964902	0.481326	0.984626	1.96012	LOC_Os02g53080	1	1
CS-PBP-ind-Nip-F1	OD	Chr2_32840863	2	32113837	33964902	0.481326	0.984626	1.96012	LOC_Os02g54890	1	1						P1HP
CS-PBP-ind-Nip-F1	OD	Chr2_32840863	2	32113837	33964902	0.481326	0.984626	1.96012	LOC_Os02g52900	1							P1HP
CS-PBP-ind-Nip-F1	OD	Chr2_32840863	2	32113837	33964902	0.481326	0.984626	1.96012	LOC_Os02g53450	1							P2LP
CS-PBP-ind-Nip-F1	OD	Chr2_32840863	2	32113837	33964902	0.481326	0.984626	1.96012	LOC_Os02g53120	1	1
CS-PBP-ind-Nip-F1	OD	Chr2_32840863	2	32113837	33964902	0.481326	0.984626	1.96012	LOC_Os02g52610
CS-PBP-ind-Nip-F1	OD	Chr2_32840863	2	32113837	33964902	0.481326	0.984626	1.96012	LOC_Os02g52950	1	1						P1HP
CS-PBP-ind-Nip-F1	OD	Chr2_32840863	2	32113837	33964902	0.481326	0.984626	1.96012	LOC_Os02g53010
CS-PBP-ind-Nip-F1	OD	Chr2_32840863	2	32113837	33964902	0.481326	0.984626	1.96012	LOC_Os02g53090					CPOD	CPOD	NoDiff
CS-PBP-ind-Nip-F1	OD	Chr2_32840863	2	32113837	33964902	0.481326	0.984626	1.96012	LOC_Os02g54050
CS-PBP-ind-Nip-F1	OD	Chr2_32840863	2	32113837	33964902	0.481326	0.984626	1.96012	LOC_Os02g53280
CS-PBP-ind-Nip-F1	OD	Chr2_32840863	2	32113837	33964902	0.481326	0.984626	1.96012	LOC_Os02g54000	1	1
CS-PBP-ind-Nip-F1	OD	Chr2_32840863	2	32113837	33964902	0.481326	0.984626	1.96012	LOC_Os02g52550	1	1			NoDiff		P1NOD
CS-PBP-ind-Nip-F1	OD	Chr2_32840863	2	32113837	33964902	0.481326	0.984626	1.96012	LOC_Os02g55300	1	1
CS-PBP-ind-Nip-F1	OD	Chr2_32840863	2	32113837	33964902	0.481326	0.984626	1.96012	LOC_Os02g53910
CS-PBP-ind-Nip-F1	OD	Chr2_32840863	2	32113837	33964902	0.481326	0.984626	1.96012	LOC_Os02g53140	1			PPS
CS-PBP-ind-Nip-F1	OD	Chr2_32840863	2	32113837	33964902	0.481326	0.984626	1.96012	LOC_Os02g53390
CS-PBP-ind-Nip-F1	OD	Chr2_32840863	2	32113837	33964902	0.481326	0.984626	1.96012	LOC_Os02g53650
CS-PBP-ind-Nip-F1	OD	Chr2_32840863	2	32113837	33964902	0.481326	0.984626	1.96012	LOC_Os02g53384	1	1
CS-PBP-ind-Nip-F1	OD	Chr2_32840863	2	32113837	33964902	0.481326	0.984626	1.96012	LOC_Os02g53580
CS-PBP-ind-Nip-F1	OD	Chr2_32840863	2	32113837	33964902	0.481326	0.984626	1.96012	LOC_Os02g54820	1	1						P1BLP
CS-PBP-ind-Nip-F1	OD	Chr2_32840863	2	32113837	33964902	0.481326	0.984626	1.96012	LOC_Os02g53690	1	1		OsGRF1; rhd1	NoDiff	P2POD	P1MP	P2LP
CS-PBP-ind-Nip-F1	OD	Chr2_32840863	2	32113837	33964902	0.481326	0.984626	1.96012	LOC_Os02g52920	1	1						P1OHP
CS-PBP-ind-Nip-F1	OD	Chr2_32840863	2	32113837	33964902	0.481326	0.984626	1.96012	LOC_Os02g55330	1	1
CS-PBP-ind-Nip-F1	OD	Chr2_32840863	2	32113837	33964902	0.481326	0.984626	1.96012	LOC_Os02g55450
CS-PBP-ind-Nip-F1	OD	Chr2_32840863	2	32113837	33964902	0.481326	0.984626	1.96012	LOC_Os02g55440	1
CS-PBP-ind-Nip-F1	OD	Chr2_32840863	2	32113837	33964902	0.481326	0.984626	1.96012	LOC_Os02g53740	1	1			NoDiff	NoDiff	P1PD
CS-PBP-ind-Nip-F1	OD	Chr2_32840863	2	32113837	33964902	0.481326	0.984626	1.96012	LOC_Os02g54190
CS-PBP-ind-Nip-F1	OD	Chr2_32840863	2	32113837	33964902	0.481326	0.984626	1.96012	LOC_Os02g55290					P1PD	NoDiff	P1ND
CS-PBP-ind-Nip-F1	OD	Chr2_32840863	2	32113837	33964902	0.481326	0.984626	1.96012	LOC_Os02g53440
CS-PBP-ind-Nip-F1	OD	Chr2_32840863	2	32113837	33964902	0.481326	0.984626	1.96012	LOC_Os02g53830	1	1			NoDiff		P1ND	P1HP
CS-PBP-ind-Nip-F1	OD	Chr2_32840863	2	32113837	33964902	0.481326	0.984626	1.96012	LOC_Os02g54010	1	1
CS-PBP-ind-Nip-F1	OD	Chr2_34204649	2	34017681	34302837	0.434854	1.06183	2.67271	LOC_Os02g55870	1	1
CS-PBP-ind-Nip-F1	OD	Chr2_34204649	2	34017681	34302837	0.434854	1.06183	2.67271	LOC_Os02g55850
CS-PBP-ind-Nip-F1	OD	Chr2_34204649	2	34017681	34302837	0.434854	1.06183	2.67271	LOC_Os02g55950	1
CS-PBP-ind-Nip-F1	OD	Chr2_34204649	2	34017681	34302837	0.434854	1.06183	2.67271	LOC_Os02g55550
CS-PBP-ind-Nip-F1	OD	Chr2_34204649	2	34017681	34302837	0.434854	1.06183	2.67271	LOC_Os02g56040
CS-PBP-ind-Nip-F1	D	Chr3_13925761	3	13902031	15102717	0.932123	0.808989	0.918324	LOC_Os03g26350	1				P2MP
CS-PBP-ind-Nip-F1	D	Chr3_13925761	3	13902031	15102717	0.932123	0.808989	0.918324	LOC_Os03g24440
CS-PBP-ind-Nip-F1	D	Chr3_13925761	3	13902031	15102717	0.932123	0.808989	0.918324	LOC_Os03g24450	1
CS-PBP-ind-Nip-F1	D	Chr3_13925761	3	13902031	15102717	0.932123	0.808989	0.918324	LOC_Os03g24470
CS-PBP-ind-Nip-F1	D	Chr3_13925761	3	13902031	15102717	0.932123	0.808989	0.918324	LOC_Os03g24410
CS-PBP-ind-Nip-F1	D	Chr3_13925761	3	13902031	15102717	0.932123	0.808989	0.918324	LOC_Os03g24460	1
CS-PBP-ind-Nip-F1	D	Chr3_13925761	3	13902031	15102717	0.932123	0.808989	0.918324	LOC_Os03g24500
CS-PBP-ind-Nip-F1	D	Chr3_13925761	3	13902031	15102717	0.932123	0.808989	0.918324	LOC_Os03g25990
CS-PBP-ind-Nip-F1	D	Chr3_13925761	3	13902031	15102717	0.932123	0.808989	0.918324	LOC_Os03g24630
CS-PBP-ind-Nip-F1	D	Chr3_13925761	3	13902031	15102717	0.932123	0.808989	0.918324	LOC_Os03g24510
CS-PBP-ind-Nip-F1	D	Chr3_13925761	3	13902031	15102717	0.932123	0.808989	0.918324	LOC_Os03g26430
CS-PBP-ind-Nip-F1	D	Chr3_13925761	3	13902031	15102717	0.932123	0.808989	0.918324	LOC_Os03g24960
CS-PBP-ind-Nip-F1	D	Chr3_13925761	3	13902031	15102717	0.932123	0.808989	0.918324	LOC_Os03g26329	1				NoDiff	P2PD	P2POD
CS-PBP-ind-Nip-F1	D	Chr3_13925761	3	13902031	15102717	0.932123	0.808989	0.918324	LOC_Os03g24420
CS-PBP-ind-Nip-F1	D	Chr3_13925761	3	13902031	15102717	0.932123	0.808989	0.918324	LOC_Os03g26360	1				P2MP	P2MP	P2PD
CS-PBP-ind-Nip-F1	D	Chr3_13925761	3	13902031	15102717	0.932123	0.808989	0.918324	LOC_Os03g24490	1
CS-PBP-ind-Nip-F1	D	Chr3_13925761	3	13902031	15102717	0.932123	0.808989	0.918324	LOC_Os03g24430
CS-PBP-ind-Nip-F1	OD	Chr3_17296378	3	17117732	18323942	0.14289	0.555499	66.2616	LOC_Os03g30320
CS-PBP-ind-Nip-F1	OD	Chr3_17296378	3	17117732	18323942	0.14289	0.555499	66.2616	LOC_Os03g30510
CS-PBP-ind-Nip-F1	OD	Chr3_17296378	3	17117732	18323942	0.14289	0.555499	66.2616	LOC_Os03g30270
CS-PBP-ind-Nip-F1	OD	Chr3_17296378	3	17117732	18323942	0.14289	0.555499	66.2616	LOC_Os03g30470
CS-PBP-ind-Nip-F1	OD	Chr3_17296378	3	17117732	18323942	0.14289	0.555499	66.2616	LOC_Os03g30370					NoDiff	NoDiff	CPOD
CS-PBP-ind-Nip-F1	OD	Chr3_17296378	3	17117732	18323942	0.14289	0.555499	66.2616	LOC_Os03g30110
CS-PBP-ind-Nip-F1	OD	Chr3_17296378	3	17117732	18323942	0.14289	0.555499	66.2616	LOC_Os03g30230
CS-PBP-ind-Nip-F1	OD	Chr3_4808879	3	3191886	5174389	0.129874	0.833981	14.7976	LOC_Os03g08850	1	1						P2LP
CS-PBP-ind-Nip-F1	OD	Chr3_4808879	3	3191886	5174389	0.129874	0.833981	14.7976	LOC_Os03g09910
CS-PBP-ind-Nip-F1	OD	Chr3_4808879	3	3191886	5174389	0.129874	0.833981	14.7976	LOC_Os03g09170	1	1
CS-PBP-ind-Nip-F1	OD	Chr3_4808879	3	3191886	5174389	0.129874	0.833981	14.7976	LOC_Os03g10200	1	1
CS-PBP-ind-Nip-F1	OD	Chr3_4808879	3	3191886	5174389	0.129874	0.833981	14.7976	LOC_Os03g09210	1							P1OHP
CS-PBP-ind-Nip-F1	OD	Chr3_4808879	3	3191886	5174389	0.129874	0.833981	14.7976	LOC_Os03g09980
CS-PBP-ind-Nip-F1	OD	Chr3_4808879	3	3191886	5174389	0.129874	0.833981	14.7976	LOC_Os03g10080
CS-PBP-ind-Nip-F1	OD	Chr3_4808879	3	3191886	5174389	0.129874	0.833981	14.7976	LOC_Os03g06379	1	1
CS-PBP-ind-Nip-F1	OD	Chr3_4808879	3	3191886	5174389	0.129874	0.833981	14.7976	LOC_Os03g06710	1	1
CS-PBP-ind-Nip-F1	OD	Chr4_17877494	4	16933379	17890456	0.461493	0.938084	2.1477	LOC_Os04g29810
CS-PBP-ind-Nip-F1	OD	Chr4_17877494	4	16933379	17890456	0.461493	0.938084	2.1477	LOC_Os04g29580
CS-PBP-ind-Nip-F1	OD	Chr4_17877494	4	16933379	17890456	0.461493	0.938084	2.1477	LOC_Os04g29469
CS-PBP-ind-Nip-F1	OD	Chr4_17877494	4	16933379	17890456	0.461493	0.938084	2.1477	LOC_Os04g29730
CS-PBP-ind-Nip-F1	OD	Chr4_17877494	4	16933379	17890456	0.461493	0.938084	2.1477	LOC_Os04g29890	1
CS-PBP-ind-Nip-F1	OD	Chr4_17877494	4	16933379	17890456	0.461493	0.938084	2.1477	LOC_Os04g29500	1				NoDiff		P2PD
CS-PBP-ind-Nip-F1	OD	Chr4_17877494	4	16933379	17890456	0.461493	0.938084	2.1477	LOC_Os04g29990
CS-PBP-ind-Nip-F1	OD	Chr4_17877494	4	16933379	17890456	0.461493	0.938084	2.1477	LOC_Os04g29530
CS-PBP-ind-Nip-F1	OD	Chr4_17877494	4	16933379	17890456	0.461493	0.938084	2.1477	LOC_Os04g29950
CS-PBP-ind-Nip-F1	OD	Chr4_17877494	4	16933379	17890456	0.461493	0.938084	2.1477	LOC_Os04g29960
CS-PBP-ind-Nip-F1	OD	Chr4_17877494	4	16933379	17890456	0.461493	0.938084	2.1477	LOC_Os04g29840
CS-PBP-ind-Nip-F1	OD	Chr4_17877494	4	16933379	17890456	0.461493	0.938084	2.1477	LOC_Os04g29970
CS-PBP-ind-Nip-F1	OD	Chr4_17877494	4	16933379	17890456	0.461493	0.938084	2.1477	LOC_Os04g29830	1				NoDiff	P1MP	NoDiff
CS-PBP-ind-Nip-F1	OD	Chr4_17877494	4	16933379	17890456	0.461493	0.938084	2.1477	LOC_Os04g29540
CS-PBP-ind-Nip-F1	OD	Chr4_17877494	4	16933379	17890456	0.461493	0.938084	2.1477	LOC_Os04g29510
CS-PBP-ind-Nip-F1	OD	Chr4_17877494	4	16933379	17890456	0.461493	0.938084	2.1477	LOC_Os04g29980					NoDiff	NoDiff	CPOD
CS-PBP-ind-Nip-F1	OD	Chr4_17877494	4	16933379	17890456	0.461493	0.938084	2.1477	LOC_Os04g29490
CS-PBP-ind-Nip-F1	OD	Chr4_17877494	4	16933379	17890456	0.461493	0.938084	2.1477	LOC_Os04g29880
CS-PBP-ind-Nip-F1	OD	Chr4_17877494	4	16933379	17890456	0.461493	0.938084	2.1477	LOC_Os04g29930
CS-PBP-ind-Nip-F1	OD	Chr4_17877494	4	16933379	17890456	0.461493	0.938084	2.1477	LOC_Os04g29630
CS-PBP-ind-Nip-F1	OD	Chr4_19681452	4	19583083	19817266	0.263684	0.718765	3.20967	LOC_Os04g32550	1							P1OHP
CS-PBP-ind-Nip-F1	OD	Chr4_19681452	4	19583083	19817266	0.263684	0.718765	3.20967	LOC_Os04g32650	1	1						P1LP
CS-PBP-ind-Nip-F1	OD	Chr4_19681452	4	19583083	19817266	0.263684	0.718765	3.20967	LOC_Os04g32710	1							P1OHP
CS-PBP-ind-Nip-F1	OD	Chr4_19681452	4	19583083	19817266	0.263684	0.718765	3.20967	LOC_Os04g32600
CS-PBP-ind-Nip-F1	OD	Chr4_19681452	4	19583083	19817266	0.263684	0.718765	3.20967	LOC_Os04g32740
CS-PBP-ind-Nip-F1	OD	Chr4_19681452	4	19583083	19817266	0.263684	0.718765	3.20967	LOC_Os04g32610					CPOD	NoDiff	NoDiff
CS-PBP-ind-Nip-F1	OD	Chr4_19681452	4	19583083	19817266	0.263684	0.718765	3.20967	LOC_Os04g32690
CS-PBP-ind-Nip-F1	OD	Chr4_19681452	4	19583083	19817266	0.263684	0.718765	3.20967	LOC_Os04g32800
CS-PBP-ind-Nip-F1	OD	Chr4_19681452	4	19583083	19817266	0.263684	0.718765	3.20967	LOC_Os04g32680
CS-PBP-ind-Nip-F1	OD	Chr4_19681452	4	19583083	19817266	0.263684	0.718765	3.20967	LOC_Os04g32660	1						P1MP	P1OHP
CS-PBP-ind-Nip-F1	OD	Chr4_19681452	4	19583083	19817266	0.263684	0.718765	3.20967	LOC_Os04g32760					P2MP
CS-PBP-ind-Nip-F1	OD	Chr4_19681452	4	19583083	19817266	0.263684	0.718765	3.20967	LOC_Os04g32640
CS-PBP-ind-Nip-F1	OD	Chr4_19681452	4	19583083	19817266	0.263684	0.718765	3.20967	LOC_Os04g32780
CS-PBP-ind-Nip-F1	OD	Chr4_19681452	4	19583083	19817266	0.263684	0.718765	3.20967	LOC_Os04g32810
CS-PBP-ind-Nip-F1	OD	Chr4_19681452	4	19583083	19817266	0.263684	0.718765	3.20967	LOC_Os04g32790	1	1
CS-PBP-ind-Nip-F1	OD	Chr4_19681452	4	19583083	19817266	0.263684	0.718765	3.20967	LOC_Os04g32590
CS-PBP-ind-Nip-F1	OD	Chr4_19681452	4	19583083	19817266	0.263684	0.718765	3.20967	LOC_Os04g32540	1	1						P2LP
CS-PBP-ind-Nip-F1	OD	Chr4_19681452	4	19583083	19817266	0.263684	0.718765	3.20967	LOC_Os04g32770	1				P2MP	P2MP	P2MP
CS-PBP-ind-Nip-F1	OD	Chr4_19681452	4	19583083	19817266	0.263684	0.718765	3.20967	LOC_Os04g32670	1	1
CS-PBP-ind-Nip-F1	OD	Chr4_19681452	4	19583083	19817266	0.263684	0.718765	3.20967	LOC_Os04g32620
CS-PBP-ind-Nip-F1	OD	Chr4_19681452	4	19583083	19817266	0.263684	0.718765	3.20967	LOC_Os04g32730
CS-PBP-ind-Nip-F1	OD	Chr4_19681452	4	19583083	19817266	0.263684	0.718765	3.20967	LOC_Os04g32580	1	1						P2LP
CS-PBP-ind-Nip-F1	D	Chr4_32675031	4	32667994	32706758	2.59312	2.37656	0.916563	LOC_Os04g54930	1	1						P1BLP
CS-PBP-ind-Nip-F1	D	Chr4_32675031	4	32667994	32706758	2.59312	2.37656	0.916563	LOC_Os04g54920
CS-PBP-ind-Nip-F1	D	Chr4_32675031	4	32667994	32706758	2.59312	2.37656	0.916563	LOC_Os04g54910
CS-PBP-ind-Nip-F1	A	Chr4_34364175	4	34229022	34458995	0.828222	0.00644637	-0.176459	LOC_Os04g57720
CS-PBP-ind-Nip-F1	A	Chr4_34364175	4	34229022	34458995	0.828222	0.00644637	-0.176459	LOC_Os04g57870	1
CS-PBP-ind-Nip-F1	D	Chr5_20333039	5	20150510	20416890	0.429907	-0.274414	-4.15446	LOC_Os05g34300
CS-PBP-ind-Nip-F1	D	Chr5_20333039	5	20150510	20416890	0.429907	-0.274414	-4.15446	LOC_Os05g34270	1				P2PD		P2POD
CS-PBP-ind-Nip-F1	D	Chr5_20333039	5	20150510	20416890	0.429907	-0.274414	-4.15446	LOC_Os05g34320	1
CS-PBP-ind-Nip-F1	D	Chr5_20333039	5	20150510	20416890	0.429907	-0.274414	-4.15446	LOC_Os05g34330
CS-PBP-ind-Nip-F1	D	Chr5_20333039	5	20150510	20416890	0.429907	-0.274414	-4.15446	LOC_Os05g34140
CS-PBP-ind-Nip-F1	D	Chr5_20333039	5	20150510	20416890	0.429907	-0.274414	-4.15446	LOC_Os05g34350
CS-PBP-ind-Nip-F1	D	Chr5_20333039	5	20150510	20416890	0.429907	-0.274414	-4.15446	LOC_Os05g34290	1	1
CS-PBP-ind-Nip-F1	D	Chr5_20333039	5	20150510	20416890	0.429907	-0.274414	-4.15446	LOC_Os05g34400
CS-PBP-ind-Nip-F1	D	Chr5_20333039	5	20150510	20416890	0.429907	-0.274414	-4.15446	LOC_Os05g34450	1	1
CS-PBP-ind-Nip-F1	D	Chr5_20333039	5	20150510	20416890	0.429907	-0.274414	-4.15446	LOC_Os05g34100
CS-PBP-ind-Nip-F1	D	Chr5_20333039	5	20150510	20416890	0.429907	-0.274414	-4.15446	LOC_Os05g34390	1				P1MP	P1MP	P1MP
CS-PBP-ind-Nip-F1	D	Chr5_20333039	5	20150510	20416890	0.429907	-0.274414	-4.15446	LOC_Os05g34440	1
CS-PBP-ind-Nip-F1	D	Chr5_20333039	5	20150510	20416890	0.429907	-0.274414	-4.15446	LOC_Os05g34420
CS-PBP-ind-Nip-F1	D	Chr5_20333039	5	20150510	20416890	0.429907	-0.274414	-4.15446	LOC_Os05g34360
CS-PBP-ind-Nip-F1	D	Chr5_20333039	5	20150510	20416890	0.429907	-0.274414	-4.15446	LOC_Os05g34410
CS-PBP-ind-Nip-F1	D	Chr5_20333039	5	20150510	20416890	0.429907	-0.274414	-4.15446	LOC_Os05g34370
CS-PBP-ind-Nip-F1	OD	Chr5_6639999	5	5968989	6674536	0.271294	-0.596506	-3.3036	LOC_Os05g11730	1	1		GSK2
CS-PBP-ind-Nip-F1	OD	Chr5_6639999	5	5968989	6674536	0.271294	-0.596506	-3.3036	LOC_Os05g11590
CS-PBP-ind-Nip-F1	OD	Chr5_6639999	5	5968989	6674536	0.271294	-0.596506	-3.3036	LOC_Os05g11660
CS-PBP-ind-Nip-F1	OD	Chr5_6639999	5	5968989	6674536	0.271294	-0.596506	-3.3036	LOC_Os05g11260					P2POD	P1PD	NoDiff
CS-PBP-ind-Nip-F1	OD	Chr5_6639999	5	5968989	6674536	0.271294	-0.596506	-3.3036	LOC_Os05g11700	1	1
CS-PBP-ind-Nip-F1	OD	Chr5_6639999	5	5968989	6674536	0.271294	-0.596506	-3.3036	LOC_Os05g11390
CS-PBP-ind-Nip-F1	OD	Chr5_6639999	5	5968989	6674536	0.271294	-0.596506	-3.3036	LOC_Os05g11750	1	1
CS-PBP-ind-Nip-F1	OD	Chr5_6639999	5	5968989	6674536	0.271294	-0.596506	-3.3036	LOC_Os05g11680	1
CS-PBP-ind-Nip-F1	OD	Chr5_6639999	5	5968989	6674536	0.271294	-0.596506	-3.3036	LOC_Os05g11380
CS-PBP-ind-Nip-F1	OD	Chr5_6639999	5	5968989	6674536	0.271294	-0.596506	-3.3036	LOC_Os05g11640
CS-PBP-ind-Nip-F1	OD	Chr5_6639999	5	5968989	6674536	0.271294	-0.596506	-3.3036	LOC_Os05g11040	1
CS-PBP-ind-Nip-F1	OD	Chr5_6639999	5	5968989	6674536	0.271294	-0.596506	-3.3036	LOC_Os05g10970
CS-PBP-ind-Nip-F1	A	Chr6_17743074	6	17702803	18010284	0.565607	-0.0893985	-0.291643	LOC_Os06g30840
CS-PBP-ind-Nip-F1	A	Chr6_17743074	6	17702803	18010284	0.565607	-0.0893985	-0.291643	LOC_Os06g30640					P2ND		NoDiff
CS-PBP-ind-Nip-F1	A	Chr6_17743074	6	17702803	18010284	0.565607	-0.0893985	-0.291643	LOC_Os06g30950
CS-PBP-ind-Nip-F1	D	Chr6_19423860	6	19409518	19457420	0.476321	-0.333111	-1.03646	LOC_Os06g33420
CS-PBP-ind-Nip-F1	D	Chr6_19423860	6	19409518	19457420	0.476321	-0.333111	-1.03646	LOC_Os06g33340	1				P2POD	NoDiff	P1ND
CS-PBP-ind-Nip-F1	D	Chr6_19423860	6	19409518	19457420	0.476321	-0.333111	-1.03646	LOC_Os06g33350
CS-PBP-ind-Nip-F1	D	Chr6_19423860	6	19409518	19457420	0.476321	-0.333111	-1.03646	LOC_Os06g33390
CS-PBP-ind-Nip-F1	D	Chr6_19423860	6	19409518	19457420	0.476321	-0.333111	-1.03646	LOC_Os06g33410
CS-PBP-ind-Nip-F1	D	Chr6_19423860	6	19409518	19457420	0.476321	-0.333111	-1.03646	LOC_Os06g33400
CS-PBP-ind-Nip-F1	D	Chr6_19423860	6	19409518	19457420	0.476321	-0.333111	-1.03646	LOC_Os06g33330	1							P1HP
CS-PBP-ind-Nip-F1	OD	Chr6_26165921	6	25650616	26524861	0.331168	0.626026	1.87213	LOC_Os06g43530
CS-PBP-ind-Nip-F1	OD	Chr6_26165921	6	25650616	26524861	0.331168	0.626026	1.87213	LOC_Os06g43910	1	1
CS-PBP-ind-Nip-F1	OD	Chr6_26165921	6	25650616	26524861	0.331168	0.626026	1.87213	LOC_Os06g43650	1							P1OHP
CS-PBP-ind-Nip-F1	OD	Chr6_26165921	6	25650616	26524861	0.331168	0.626026	1.87213	LOC_Os06g43750
CS-PBP-ind-Nip-F1	OD	Chr6_26165921	6	25650616	26524861	0.331168	0.626026	1.87213	LOC_Os06g43190	1
CS-PBP-ind-Nip-F1	OD	Chr6_26165921	6	25650616	26524861	0.331168	0.626026	1.87213	LOC_Os06g43480
CS-PBP-ind-Nip-F1	OD	Chr6_26165921	6	25650616	26524861	0.331168	0.626026	1.87213	LOC_Os06g43180	1				P2MP
CS-PBP-ind-Nip-F1	OD	Chr6_26165921	6	25650616	26524861	0.331168	0.626026	1.87213	LOC_Os06g43520
CS-PBP-ind-Nip-F1	OD	Chr6_26165921	6	25650616	26524861	0.331168	0.626026	1.87213	LOC_Os06g43760	1	1						P1LP
CS-PBP-ind-Nip-F1	OD	Chr6_26165921	6	25650616	26524861	0.331168	0.626026	1.87213	LOC_Os06g43100
CS-PBP-ind-Nip-F1	OD	Chr6_26165921	6	25650616	26524861	0.331168	0.626026	1.87213	LOC_Os06g42780
CS-PBP-ind-Nip-F1	OD	Chr6_26165921	6	25650616	26524861	0.331168	0.626026	1.87213	LOC_Os06g43210	1				P1PD	NoDiff
CS-PBP-ind-Nip-F1	OD	Chr6_26165921	6	25650616	26524861	0.331168	0.626026	1.87213	LOC_Os06g42800	1
CS-PBP-ind-Nip-F1	OD	Chr6_26165921	6	25650616	26524861	0.331168	0.626026	1.87213	LOC_Os06g42770	1	1
CS-PBP-ind-Nip-F1	D	Chr6_29058344	6	27212701	29140376	0.375924	-0.397859	-1.09621	LOC_Os06g48140
CS-PBP-ind-Nip-F1	D	Chr6_29058344	6	27212701	29140376	0.375924	-0.397859	-1.09621	LOC_Os06g48170	1	1
CS-PBP-ind-Nip-F1	D	Chr6_29058344	6	27212701	29140376	0.375924	-0.397859	-1.09621	LOC_Os06g48040					NoDiff		P1PD
CS-PBP-ind-Nip-F1	D	Chr6_29058344	6	27212701	29140376	0.375924	-0.397859	-1.09621	LOC_Os06g44990
CS-PBP-ind-Nip-F1	D	Chr6_29058344	6	27212701	29140376	0.375924	-0.397859	-1.09621	LOC_Os06g48060	1	1
CS-PBP-ind-Nip-F1	D	Chr6_29058344	6	27212701	29140376	0.375924	-0.397859	-1.09621	LOC_Os06g48050
CS-PBP-ind-Nip-F1	D	Chr6_29058344	6	27212701	29140376	0.375924	-0.397859	-1.09621	LOC_Os06g48030
CS-PBP-ind-Nip-F1	D	Chr6_29058344	6	27212701	29140376	0.375924	-0.397859	-1.09621	LOC_Os06g48160	1				P2MP		NoDiff	P1OHP
CS-PBP-ind-Nip-F1	D	Chr6_29058344	6	27212701	29140376	0.375924	-0.397859	-1.09621	LOC_Os06g48020
CS-PBP-ind-Nip-F1	D	Chr6_29058344	6	27212701	29140376	0.375924	-0.397859	-1.09621	LOC_Os06g48065	1	1						P1HP
CS-PBP-ind-Nip-F1	D	Chr6_29058344	6	27212701	29140376	0.375924	-0.397859	-1.09621	LOC_Os06g45220
CS-PBP-ind-Nip-F1	D	Chr6_3656529	6	3172735	3913359	0.26522	0.340993	2.18904	LOC_Os06g07480	1
CS-PBP-ind-Nip-F1	D	Chr6_3656529	6	3172735	3913359	0.26522	0.340993	2.18904	LOC_Os06g06950
CS-PBP-ind-Nip-F1	D	Chr6_3656529	6	3172735	3913359	0.26522	0.340993	2.18904	LOC_Os06g06930
CS-PBP-ind-Nip-F1	D	Chr6_3656529	6	3172735	3913359	0.26522	0.340993	2.18904	LOC_Os06g07630	1	1						P1LP
CS-PBP-ind-Nip-F1	D	Chr6_3656529	6	3172735	3913359	0.26522	0.340993	2.18904	LOC_Os06g07860
CS-PBP-ind-Nip-F1	D	Chr6_3656529	6	3172735	3913359	0.26522	0.340993	2.18904	LOC_Os06g06980	1
CS-PBP-ind-Nip-F1	D	Chr6_3656529	6	3172735	3913359	0.26522	0.340993	2.18904	LOC_Os06g07060
CS-PBP-ind-Nip-F1	D	Chr6_3656529	6	3172735	3913359	0.26522	0.340993	2.18904	LOC_Os06g07120
CS-PBP-ind-Nip-F1	D	Chr6_3656529	6	3172735	3913359	0.26522	0.340993	2.18904	LOC_Os06g07390
CS-PBP-ind-Nip-F1	D	Chr6_3656529	6	3172735	3913359	0.26522	0.340993	2.18904	LOC_Os06g07600	1					P2ND	P1ND
CS-PBP-ind-Nip-F1	D	Chr6_3656529	6	3172735	3913359	0.26522	0.340993	2.18904	LOC_Os06g07270
CS-PBP-ind-Nip-F1	D	Chr6_3656529	6	3172735	3913359	0.26522	0.340993	2.18904	LOC_Os06g07100					NoDiff	NoDiff	P1NOD
CS-PBP-ind-Nip-F1	D	Chr6_3656529	6	3172735	3913359	0.26522	0.340993	2.18904	LOC_Os06g07800
CS-PBP-ind-Nip-F1	D	Chr6_3656529	6	3172735	3913359	0.26522	0.340993	2.18904	LOC_Os06g07840
CS-PBP-ind-Nip-F1	D	Chr6_3656529	6	3172735	3913359	0.26522	0.340993	2.18904	LOC_Os06g07380
CS-PBP-ind-Nip-F1	D	Chr6_3656529	6	3172735	3913359	0.26522	0.340993	2.18904	LOC_Os06g07110	1
CS-PBP-ind-Nip-F1	D	Chr6_3656529	6	3172735	3913359	0.26522	0.340993	2.18904	LOC_Os06g07230					NoDiff	P2POD	NoDiff
CS-PBP-ind-Nip-F1	D	Chr6_3656529	6	3172735	3913359	0.26522	0.340993	2.18904	LOC_Os06g06940
CS-PBP-ind-Nip-F1	D	Chr6_3656529	6	3172735	3913359	0.26522	0.340993	2.18904	LOC_Os06g07080	1	1						P1BLP
CS-PBP-ind-Nip-F1	D	Chr6_3656529	6	3172735	3913359	0.26522	0.340993	2.18904	LOC_Os06g07130	1
CS-PBP-ind-Nip-F1	D	Chr6_3656529	6	3172735	3913359	0.26522	0.340993	2.18904	LOC_Os06g07730
CS-PBP-ind-Nip-F1	D	Chr6_3656529	6	3172735	3913359	0.26522	0.340993	2.18904	LOC_Os06g07320
CS-PBP-ind-Nip-F1	D	Chr6_3656529	6	3172735	3913359	0.26522	0.340993	2.18904	LOC_Os06g07260
CS-PBP-ind-Nip-F1	D	Chr6_3656529	6	3172735	3913359	0.26522	0.340993	2.18904	LOC_Os06g07580	1	1			NoDiff	P2ND	P2POD	P1OHP
CS-PBP-ind-Nip-F1	D	Chr6_3656529	6	3172735	3913359	0.26522	0.340993	2.18904	LOC_Os06g07010					NoDiff	NoDiff	P1NOD
CS-PBP-ind-Nip-F1	D	Chr6_3656529	6	3172735	3913359	0.26522	0.340993	2.18904	LOC_Os06g07400	1
CS-PBP-ind-Nip-F1	D	Chr6_3656529	6	3172735	3913359	0.26522	0.340993	2.18904	LOC_Os06g07200
CS-PBP-ind-Nip-F1	D	Chr6_3656529	6	3172735	3913359	0.26522	0.340993	2.18904	LOC_Os06g06910
CS-PBP-ind-Nip-F1	D	Chr6_3656529	6	3172735	3913359	0.26522	0.340993	2.18904	LOC_Os06g07530	1
CS-PBP-ind-Nip-F1	D	Chr6_3656529	6	3172735	3913359	0.26522	0.340993	2.18904	LOC_Os06g06920
CS-PBP-ind-Nip-F1	D	Chr6_3656529	6	3172735	3913359	0.26522	0.340993	2.18904	LOC_Os06g07300
CS-PBP-ind-Nip-F1	D	Chr6_3656529	6	3172735	3913359	0.26522	0.340993	2.18904	LOC_Os06g07210	1	1						P1BLP
CS-PBP-ind-Nip-F1	D	Chr6_3656529	6	3172735	3913359	0.26522	0.340993	2.18904	LOC_Os06g07620	1	1
CS-PBP-ind-Nip-F1	D	Chr6_3656529	6	3172735	3913359	0.26522	0.340993	2.18904	LOC_Os06g07560	1							P1HP
CS-PBP-ind-Nip-F1	D	Chr6_3656529	6	3172735	3913359	0.26522	0.340993	2.18904	LOC_Os06g07710
CS-PBP-ind-Nip-F1	D	Chr6_3656529	6	3172735	3913359	0.26522	0.340993	2.18904	LOC_Os06g07160	1							P2OHP
CS-PBP-ind-Nip-F1	D	Chr6_3656529	6	3172735	3913359	0.26522	0.340993	2.18904	LOC_Os06g07430
CS-PBP-ind-Nip-F1	D	Chr6_3656529	6	3172735	3913359	0.26522	0.340993	2.18904	LOC_Os06g07570
CS-PBP-ind-Nip-F1	D	Chr6_3656529	6	3172735	3913359	0.26522	0.340993	2.18904	LOC_Os06g07090	1	1			P1POD		NoDiff
CS-PBP-ind-Nip-F1	D	Chr6_3656529	6	3172735	3913359	0.26522	0.340993	2.18904	LOC_Os06g08070					NoDiff	NoDiff	P2PD
CS-PBP-ind-Nip-F1	D	Chr6_3656529	6	3172735	3913359	0.26522	0.340993	2.18904	LOC_Os06g07540	1							P1LP
CS-PBP-ind-Nip-F1	D	Chr6_3656529	6	3172735	3913359	0.26522	0.340993	2.18904	LOC_Os06g07670
CS-PBP-ind-Nip-F1	D	Chr6_3656529	6	3172735	3913359	0.26522	0.340993	2.18904	LOC_Os06g07460
CS-PBP-ind-Nip-F1	D	Chr6_3656529	6	3172735	3913359	0.26522	0.340993	2.18904	LOC_Os06g07690
CS-PBP-ind-Nip-F1	D	Chr6_3656529	6	3172735	3913359	0.26522	0.340993	2.18904	LOC_Os06g07960
CS-PBP-ind-Nip-F1	D	Chr6_3656529	6	3172735	3913359	0.26522	0.340993	2.18904	LOC_Os06g07170
CS-PBP-ind-Nip-F1	D	Chr6_3656529	6	3172735	3913359	0.26522	0.340993	2.18904	LOC_Os06g07150					P1PD	NoDiff	NoDiff
CS-PBP-ind-Nip-F1	D	Chr6_3656529	6	3172735	3913359	0.26522	0.340993	2.18904	LOC_Os06g07240	1
CS-PBP-ind-Nip-F1	D	Chr6_3656529	6	3172735	3913359	0.26522	0.340993	2.18904	LOC_Os06g07790
CS-PBP-ind-Nip-F1	D	Chr6_3656529	6	3172735	3913359	0.26522	0.340993	2.18904	LOC_Os06g07190	1	1
CS-PBP-ind-Nip-F1	D	Chr6_3656529	6	3172735	3913359	0.26522	0.340993	2.18904	LOC_Os06g07640
CS-PBP-ind-Nip-F1	D	Chr6_3656529	6	3172735	3913359	0.26522	0.340993	2.18904	LOC_Os06g07280	1
CS-PBP-ind-Nip-F1	D	Chr6_3656529	6	3172735	3913359	0.26522	0.340993	2.18904	LOC_Os06g07700
CS-PBP-ind-Nip-F1	D	Chr6_3656529	6	3172735	3913359	0.26522	0.340993	2.18904	LOC_Os06g07740
CS-PBP-ind-Nip-F1	D	Chr6_3656529	6	3172735	3913359	0.26522	0.340993	2.18904	LOC_Os06g07660					NoDiff	CPOD	NoDiff
CS-PBP-ind-Nip-F1	D	Chr6_3656529	6	3172735	3913359	0.26522	0.340993	2.18904	LOC_Os06g07250
CS-PBP-ind-Nip-F1	D	Chr6_3656529	6	3172735	3913359	0.26522	0.340993	2.18904	LOC_Os06g07350	1	1
CS-PBP-ind-Nip-F1	D	Chr6_3656529	6	3172735	3913359	0.26522	0.340993	2.18904	LOC_Os06g07650
CS-PBP-ind-Nip-F1	D	Chr6_3656529	6	3172735	3913359	0.26522	0.340993	2.18904	LOC_Os06g07140	1	1
CS-PBP-ind-Nip-F1	D	Chr6_3656529	6	3172735	3913359	0.26522	0.340993	2.18904	LOC_Os06g07820					NoDiff	NoDiff	P1PD
CS-PBP-ind-Nip-F1	D	Chr6_3656529	6	3172735	3913359	0.26522	0.340993	2.18904	LOC_Os06g07020
CS-PBP-ind-Nip-F1	D	Chr6_3656529	6	3172735	3913359	0.26522	0.340993	2.18904	LOC_Os06g07220	1	1						P1OHP
CS-PBP-ind-Nip-F1	D	Chr6_3656529	6	3172735	3913359	0.26522	0.340993	2.18904	LOC_Os06g07030	1
CS-PBP-ind-Nip-F1	D	Chr6_3656529	6	3172735	3913359	0.26522	0.340993	2.18904	LOC_Os06g07040
CS-PBP-ind-Nip-F1	D	Chr6_3656529	6	3172735	3913359	0.26522	0.340993	2.18904	LOC_Os06g07830
CS-PBP-ind-Nip-F1	D	Chr6_3656529	6	3172735	3913359	0.26522	0.340993	2.18904	LOC_Os06g07070	1							P1HP
CS-PBP-ind-Nip-F1	D	Chr6_3656529	6	3172735	3913359	0.26522	0.340993	2.18904	LOC_Os06g07474	1
CS-PBP-ind-Nip-F1	D	Chr6_3656529	6	3172735	3913359	0.26522	0.340993	2.18904	LOC_Os06g07360
CS-PBP-ind-Nip-F1	D	Chr6_3656529	6	3172735	3913359	0.26522	0.340993	2.18904	LOC_Os06g07770	1
CS-PBP-ind-Nip-F1	D	Chr6_3656529	6	3172735	3913359	0.26522	0.340993	2.18904	LOC_Os06g07750
CS-PBP-ind-Nip-F1	D	Chr6_3656529	6	3172735	3913359	0.26522	0.340993	2.18904	LOC_Os06g07470	1
CS-PBP-ind-Nip-F1	D	Chr6_3656529	6	3172735	3913359	0.26522	0.340993	2.18904	LOC_Os06g08060
CS-PBP-ind-Nip-F1	D	Chr6_3656529	6	3172735	3913359	0.26522	0.340993	2.18904	LOC_Os06g07780	1							P1OHP
CS-PBP-ind-Nip-F1	D	Chr6_3656529	6	3172735	3913359	0.26522	0.340993	2.18904	LOC_Os06g07720	1
CS-PBP-ind-Nip-F1	D	Chr6_3656529	6	3172735	3913359	0.26522	0.340993	2.18904	LOC_Os06g07180
CS-PBP-ind-Nip-F1	D	Chr6_3656529	6	3172735	3913359	0.26522	0.340993	2.18904	LOC_Os06g07590
CS-PBP-ind-Nip-F1	D	Chr6_3656529	6	3172735	3913359	0.26522	0.340993	2.18904	LOC_Os06g07810	1							P2BLP
CS-PBP-ind-Nip-F1	D	Chr6_3656529	6	3172735	3913359	0.26522	0.340993	2.18904	LOC_Os06g07000
CS-PBP-ind-Nip-F1	D	Chr6_3656529	6	3172735	3913359	0.26522	0.340993	2.18904	LOC_Os06g07490	1	1
CS-PBP-ind-Nip-F1	D	Chr6_3656529	6	3172735	3913359	0.26522	0.340993	2.18904	LOC_Os06g07850
CS-PBP-ind-Nip-F1	D	Chr6_3656529	6	3172735	3913359	0.26522	0.340993	2.18904	LOC_Os06g06900	1
CS-PBP-ind-Nip-F1	D	Chr6_3656529	6	3172735	3913359	0.26522	0.340993	2.18904	LOC_Os06g07550	1	1
CS-PBP-ind-Nip-F1	D	Chr6_3656529	6	3172735	3913359	0.26522	0.340993	2.18904	LOC_Os06g07760	1	1
CS-PBP-ind-Nip-F1	D	Chr6_3656529	6	3172735	3913359	0.26522	0.340993	2.18904	LOC_Os06g06970
CS-PBP-ind-Nip-F1	OD	Chr7_1268074	7	1257739	1294892	0.498501	-1.17036	-2.48515	LOC_Os07g03220
CS-PBP-ind-Nip-F1	OD	Chr7_1268074	7	1257739	1294892	0.498501	-1.17036	-2.48515	LOC_Os07g03240	1	1
CS-PBP-ind-Nip-F1	D	Chr7_1437523	7	1303003	1544371	0.803354	1.02537	1.28264	LOC_Os07g03690
CS-PBP-ind-Nip-F1	D	Chr7_1437523	7	1303003	1544371	0.803354	1.02537	1.28264	LOC_Os07g03590
CS-PBP-ind-Nip-F1	D	Chr7_1437523	7	1303003	1544371	0.803354	1.02537	1.28264	LOC_Os07g03250	1	1	LOC_Os7g325
CS-PBP-ind-Nip-F1	D	Chr7_1437523	7	1303003	1544371	0.803354	1.02537	1.28264	LOC_Os07g03580
CS-PBP-ind-Nip-F1	D	Chr7_1437523	7	1303003	1544371	0.803354	1.02537	1.28264	LOC_Os07g03650					CPOD	NoDiff
CS-PBP-ind-Nip-F1	D	Chr7_1437523	7	1303003	1544371	0.803354	1.02537	1.28264	LOC_Os07g03270	1							P1HP
CS-PBP-ind-Nip-F1	D	Chr7_1437523	7	1303003	1544371	0.803354	1.02537	1.28264	LOC_Os07g03600
CS-PBP-ind-Nip-F1	D	Chr7_1437523	7	1303003	1544371	0.803354	1.02537	1.28264	LOC_Os07g03620
CS-PBP-ind-Nip-F1	D	Chr7_1437523	7	1303003	1544371	0.803354	1.02537	1.28264	LOC_Os07g03288
CS-PBP-ind-Nip-F1	D	Chr7_1437523	7	1303003	1544371	0.803354	1.02537	1.28264	LOC_Os07g03610
CS-PBP-ind-Nip-F1	D	Chr7_1437523	7	1303003	1544371	0.803354	1.02537	1.28264	LOC_Os07g03760					NoDiff	P2PD	P1ND
CS-PBP-ind-Nip-F1	D	Chr7_1437523	7	1303003	1544371	0.803354	1.02537	1.28264	LOC_Os07g03260	1							P1HP
CS-PBP-ind-Nip-F1	D	Chr7_22900037	7	22471112	23167121	0.590899	0.870245	-0.240466	LOC_Os07g38110					NoDiff		P2PD
CS-PBP-ind-Nip-F1	D	Chr7_22900037	7	22471112	23167121	0.590899	0.870245	-0.240466	LOC_Os07g38400
CS-PBP-ind-Nip-F1	OD	Chr7_26783031	7	26783001	26783161	0.280827	0.439612	1.59175	LOC_Os07g44860
CS-PBP-ind-Nip-F1	D	Chr7_3663348	7	1788817	3684613	0.74364	0.625317	0.807825	LOC_Os07g05430
CS-PBP-ind-Nip-F1	D	Chr7_3663348	7	1788817	3684613	0.74364	0.625317	0.807825	LOC_Os07g07320	1	1				P2MP		P1HP
CS-PBP-ind-Nip-F1	D	Chr7_3663348	7	1788817	3684613	0.74364	0.625317	0.807825	LOC_Os07g05440					P2MP	P2MP	P2MP
CS-PBP-ind-Nip-F1	D	Chr7_3663348	7	1788817	3684613	0.74364	0.625317	0.807825	LOC_Os07g04180	1
CS-PBP-ind-Nip-F1	OD	Chr7_6891348	7	5316211	6902221	0.614506	1.21473	2.0255	LOC_Os07g10130	1	1
CS-PBP-ind-Nip-F1	OD	Chr7_6891348	7	5316211	6902221	0.614506	1.21473	2.0255	LOC_Os07g09970					NoDiff	NoDiff	P2ND
CS-PBP-ind-Nip-F1	OD	Chr8_10778939	8	9114990	10827036	0.558543	1.43829	3.22125	LOC_Os08g17655
CS-PBP-ind-Nip-F1	OD	Chr8_10778939	8	9114990	10827036	0.558543	1.43829	3.22125	LOC_Os08g15560
CS-PBP-ind-Nip-F1	OD	Chr8_10778939	8	9114990	10827036	0.558543	1.43829	3.22125	LOC_Os08g17690
CS-PBP-ind-Nip-F1	OD	Chr8_10778939	8	9114990	10827036	0.558543	1.43829	3.22125	LOC_Os08g15322
CS-PBP-ind-Nip-F1	OD	Chr8_10778939	8	9114990	10827036	0.558543	1.43829	3.22125	LOC_Os08g16100	1
CS-PBP-ind-Nip-F1	OD	Chr8_10778939	8	9114990	10827036	0.558543	1.43829	3.22125	LOC_Os08g17680	1
CS-PBP-ind-Nip-F1	OD	Chr8_10778939	8	9114990	10827036	0.558543	1.43829	3.22125	LOC_Os08g17650	1
CS-PBP-ind-Nip-F1	OD	Chr8_10778939	8	9114990	10827036	0.558543	1.43829	3.22125	LOC_Os08g16070
CS-PBP-ind-Nip-F1	OD	Chr8_10778939	8	9114990	10827036	0.558543	1.43829	3.22125	LOC_Os08g16050
CS-PBP-ind-Nip-F1	OD	Chr8_10778939	8	9114990	10827036	0.558543	1.43829	3.22125	LOC_Os08g16060
CS-PBP-ind-Nip-F1	OD	Chr8_10778939	8	9114990	10827036	0.558543	1.43829	3.22125	LOC_Os08g16410
CS-PBP-ind-Nip-F1	OD	Chr8_10778939	8	9114990	10827036	0.558543	1.43829	3.22125	LOC_Os08g16340
CS-PBP-ind-Nip-F1	OD	Chr8_10778939	8	9114990	10827036	0.558543	1.43829	3.22125	LOC_Os08g15570
CS-PBP-ind-Nip-F1	OD	Chr8_10778939	8	9114990	10827036	0.558543	1.43829	3.22125	LOC_Os08g16430	1	1
CS-PBP-ind-Nip-F1	OD	Chr8_10778939	8	9114990	10827036	0.558543	1.43829	3.22125	LOC_Os08g16420					P1POD	CPOD	NoDiff
CS-PBP-ind-Nip-F1	A	Chr8_18759578	8	18682160	18948618	0.582722	-0.000462362	0.0367693	LOC_Os08g30554
CS-PBP-ind-Nip-F1	A	Chr8_18759578	8	18682160	18948618	0.582722	-0.000462362	0.0367693	LOC_Os08g30410
CS-PBP-ind-Nip-F1	A	Chr8_18759578	8	18682160	18948618	0.582722	-0.000462362	0.0367693	LOC_Os08g30400
CS-PBP-ind-Nip-F1	A	Chr8_18759578	8	18682160	18948618	0.582722	-0.000462362	0.0367693	LOC_Os08g30560
CS-PBP-ind-Nip-F1	A	Chr8_18759578	8	18682160	18948618	0.582722	-0.000462362	0.0367693	LOC_Os08g30480	1
CS-PBP-ind-Nip-F1	A	Chr8_18759578	8	18682160	18948618	0.582722	-0.000462362	0.0367693	LOC_Os08g30360					CPOD
CS-PBP-ind-Nip-F1	OD	Chr8_20310290	8	19622028	20530700	0.303186	0.576247	3.09125	LOC_Os08g32540
CS-PBP-ind-Nip-F1	OD	Chr8_20310290	8	19622028	20530700	0.303186	0.576247	3.09125	LOC_Os08g32430
CS-PBP-ind-Nip-F1	OD	Chr8_20310290	8	19622028	20530700	0.303186	0.576247	3.09125	LOC_Os08g32910	1	1
CS-PBP-ind-Nip-F1	OD	Chr8_20310290	8	19622028	20530700	0.303186	0.576247	3.09125	LOC_Os08g33050					NoDiff	NoDiff	P2ND
CS-PBP-ind-Nip-F1	OD	Chr8_20310290	8	19622028	20530700	0.303186	0.576247	3.09125	LOC_Os08g33030
CS-PBP-ind-Nip-F1	OD	Chr8_20310290	8	19622028	20530700	0.303186	0.576247	3.09125	LOC_Os08g32900
CS-PBP-ind-Nip-F1	OD	Chr8_20310290	8	19622028	20530700	0.303186	0.576247	3.09125	LOC_Os08g32360	1	1			P1PD	NoDiff		P2HP
CS-PBP-ind-Nip-F1	OD	Chr8_20310290	8	19622028	20530700	0.303186	0.576247	3.09125	LOC_Os08g32550
CS-PBP-ind-Nip-F1	OD	Chr8_21990983	8	20645291	22628489	0.262952	0.794233	5.23322	LOC_Os08g34930
CS-PBP-ind-Nip-F1	OD	Chr8_21990983	8	20645291	22628489	0.262952	0.794233	5.23322	LOC_Os08g33630	1
CS-PBP-ind-Nip-F1	OD	Chr8_21990983	8	20645291	22628489	0.262952	0.794233	5.23322	LOC_Os08g35010	1	1
CS-PBP-ind-Nip-F1	OD	Chr8_21990983	8	20645291	22628489	0.262952	0.794233	5.23322	LOC_Os08g34850	1							P1BLP
CS-PBP-ind-Nip-F1	OD	Chr8_21990983	8	20645291	22628489	0.262952	0.794233	5.23322	LOC_Os08g34500	1							P2LP
CS-PBP-ind-Nip-F1	OD	Chr8_22863739	8	22669284	23439132	0.132362	0.851997	9.68296	LOC_Os08g36160	1
CS-PBP-ind-Nip-F1	OD	Chr8_22863739	8	22669284	23439132	0.132362	0.851997	9.68296	LOC_Os08g37080
CS-PBP-ind-Nip-F1	OD	Chr8_22863739	8	22669284	23439132	0.132362	0.851997	9.68296	LOC_Os08g35939	1	1
CS-PBP-ind-Nip-F1	OD	Chr8_22863739	8	22669284	23439132	0.132362	0.851997	9.68296	LOC_Os08g36510
CS-PBP-ind-Nip-F1	OD	Chr8_22863739	8	22669284	23439132	0.132362	0.851997	9.68296	LOC_Os08g36150	1
CS-PBP-ind-Nip-F1	OD	Chr9_15828033	9	14945390	15908809	0.416978	1.3121	3.92817	LOC_Os09g26280
CS-PBP-ind-Nip-F1	OD	Chr9_15828033	9	14945390	15908809	0.416978	1.3121	3.92817	LOC_Os09g26270
CS-PBP-ind-Nip-F1	OD	Chr9_15828033	9	14945390	15908809	0.416978	1.3121	3.92817	LOC_Os09g26210
CS-PBP-ind-Nip-F1	OD	Chr9_15828033	9	14945390	15908809	0.416978	1.3121	3.92817	LOC_Os09g26190	1							P2BLP
CS-PBP-ind-Nip-F1	OD	Chr9_15828033	9	14945390	15908809	0.416978	1.3121	3.92817	LOC_Os09g26260	1	1			NoDiff	NoDiff	P1ND	P1BLP
CS-PBP-ind-Nip-F1	OD	Chr9_15828033	9	14945390	15908809	0.416978	1.3121	3.92817	LOC_Os09g26200
CS-PBP-ind-Nip-F1	OD	Chr9_15828033	9	14945390	15908809	0.416978	1.3121	3.92817	LOC_Os09g26290
CS-PBP-ind-Nip-F1	OD	Chr9_15828033	9	14945390	15908809	0.416978	1.3121	3.92817	LOC_Os09g26240	1
CS-PBP-ind-Nip-F1	OD	Chr9_15828033	9	14945390	15908809	0.416978	1.3121	3.92817	LOC_Os09g25010
CS-PBP-ind-Nip-F1	OD	Chr9_15973617	9	15909193	16406690	0.458176	0.994593	2.25915	LOC_Os09g26980
CS-PBP-ind-Nip-F1	OD	Chr9_15973617	9	15909193	16406690	0.458176	0.994593	2.25915	LOC_Os09g26640	1
CS-PBP-ind-Nip-F1	OD	Chr9_19182296	9	17743904	19742991	0.629735	2.05868	3.37804	LOC_Os09g32920
CS-PBP-ind-Nip-F1	OD	Chr9_19182296	9	17743904	19742991	0.629735	2.05868	3.37804	LOC_Os09g29840	1					P1ND	NoDiff	P2LP
CS-PBP-ind-Nip-F1	OD	Chr9_19182296	9	17743904	19742991	0.629735	2.05868	3.37804	LOC_Os09g32526	1							P2HP
CS-PBP-ind-Nip-F1	OD	Chr9_19182296	9	17743904	19742991	0.629735	2.05868	3.37804	LOC_Os09g32120
CS-PBP-ind-Nip-F1	OD	Chr9_19182296	9	17743904	19742991	0.629735	2.05868	3.37804	LOC_Os09g33450	1	1
CS-PBP-ind-Nip-F1	OD	Chr9_19182296	9	17743904	19742991	0.629735	2.05868	3.37804	LOC_Os09g29900
CS-PBP-ind-Nip-F1	OD	Chr9_19182296	9	17743904	19742991	0.629735	2.05868	3.37804	LOC_Os09g32580	1	1
CS-PBP-ind-Nip-F1	OD	Chr9_19182296	9	17743904	19742991	0.629735	2.05868	3.37804	LOC_Os09g31270
CS-PBP-ind-Nip-F1	OD	Chr9_19182296	9	17743904	19742991	0.629735	2.05868	3.37804	LOC_Os09g30400					P1PD		NoDiff
CS-PBP-ind-Nip-F1	OD	Chr9_19182296	9	17743904	19742991	0.629735	2.05868	3.37804	LOC_Os09g32500	1							P1OHP
CS-PBP-ind-Nip-F1	OD	Chr9_19182296	9	17743904	19742991	0.629735	2.05868	3.37804	LOC_Os09g32640	1							P1HP
CS-PBP-ind-Nip-F1	OD	Chr9_19182296	9	17743904	19742991	0.629735	2.05868	3.37804	LOC_Os09g31310	1							P1HP
CS-PBP-ind-Nip-F1	OD	Chr9_19182296	9	17743904	19742991	0.629735	2.05868	3.37804	LOC_Os09g31494
CS-PBP-ind-Nip-F1	OD	Chr9_19182296	9	17743904	19742991	0.629735	2.05868	3.37804	LOC_Os09g32230
CS-PBP-ind-Nip-F1	OD	Chr9_19182296	9	17743904	19742991	0.629735	2.05868	3.37804	LOC_Os09g31442
CS-PBP-ind-Nip-F1	OD	Chr9_19182296	9	17743904	19742991	0.629735	2.05868	3.37804	LOC_Os09g30506
CS-PBP-ind-Nip-F1	OD	Chr9_19182296	9	17743904	19742991	0.629735	2.05868	3.37804	LOC_Os09g32250	1	1						P2HP
CS-PBP-ind-Nip-F1	OD	Chr9_19182296	9	17743904	19742991	0.629735	2.05868	3.37804	LOC_Os09g33460	1	1						P2LP
CS-PBP-ind-Nip-F1	OD	Chr9_19182296	9	17743904	19742991	0.629735	2.05868	3.37804	LOC_Os09g30474
CS-PBP-ind-Nip-F1	OD	Chr9_19182296	9	17743904	19742991	0.629735	2.05868	3.37804	LOC_Os09g32948	1							P2BLP
CS-PBP-ind-Nip-F1	OD	Chr9_19182296	9	17743904	19742991	0.629735	2.05868	3.37804	LOC_Os09g32870					CPOD	NoDiff	NoDiff
CS-PBP-ind-Nip-F1	OD	Chr9_19182296	9	17743904	19742991	0.629735	2.05868	3.37804	LOC_Os09g32210	1	1			NoDiff	NoDiff	P2PD	P1LP
CS-PBP-ind-Nip-F1	OD	Chr9_19182296	9	17743904	19742991	0.629735	2.05868	3.37804	LOC_Os09g31140
CS-PBP-ind-Nip-F1	OD	Chr9_19182296	9	17743904	19742991	0.629735	2.05868	3.37804	LOC_Os09g32390	1
CS-PBP-ind-Nip-F1	OD	Chr9_19182296	9	17743904	19742991	0.629735	2.05868	3.37804	LOC_Os09g31230	1							P1LP
CS-PBP-ind-Nip-F1	OD	Chr9_19182296	9	17743904	19742991	0.629735	2.05868	3.37804	LOC_Os09g32610	1
CS-PBP-ind-Nip-F1	OD	Chr9_19182296	9	17743904	19742991	0.629735	2.05868	3.37804	LOC_Os09g29825
CS-PBP-ind-Nip-F1	OD	Chr9_19182296	9	17743904	19742991	0.629735	2.05868	3.37804	LOC_Os09g32730
CS-PBP-ind-Nip-F1	OD	Chr9_19182296	9	17743904	19742991	0.629735	2.05868	3.37804	LOC_Os09g32590
CS-PBP-ind-Nip-F1	OD	Chr9_19182296	9	17743904	19742991	0.629735	2.05868	3.37804	LOC_Os09g32160
CS-PBP-ind-Nip-F1	OD	Chr9_19182296	9	17743904	19742991	0.629735	2.05868	3.37804	LOC_Os09g29910
CS-PBP-ind-Nip-F1	OD	Chr9_19182296	9	17743904	19742991	0.629735	2.05868	3.37804	LOC_Os09g32660
CS-PBP-ind-Nip-F1	OD	Chr9_19182296	9	17743904	19742991	0.629735	2.05868	3.37804	LOC_Os09g31019
CS-PBP-ind-Nip-F1	OD	Chr9_19182296	9	17743904	19742991	0.629735	2.05868	3.37804	LOC_Os09g31454	1
CS-PBP-ind-Nip-F1	OD	Chr9_19182296	9	17743904	19742991	0.629735	2.05868	3.37804	LOC_Os09g30250	1	1						P1LP
CS-PBP-ind-Nip-F1	OD	Chr9_19182296	9	17743904	19742991	0.629735	2.05868	3.37804	LOC_Os09g32890					NoDiff	P2ND	NoDiff
CS-PBP-ind-Nip-F1	OD	Chr9_19182296	9	17743904	19742991	0.629735	2.05868	3.37804	LOC_Os09g32180	1							P1BLP
CS-PBP-ind-Nip-F1	OD	Chr9_19182296	9	17743904	19742991	0.629735	2.05868	3.37804	LOC_Os09g32980
CS-PBP-ind-Nip-F1	OD	Chr9_19182296	9	17743904	19742991	0.629735	2.05868	3.37804	LOC_Os09g32310
CS-PBP-ind-Nip-F1	OD	Chr9_19182296	9	17743904	19742991	0.629735	2.05868	3.37804	LOC_Os09g31240
CS-PBP-ind-Nip-F1	OD	Chr9_19182296	9	17743904	19742991	0.629735	2.05868	3.37804	LOC_Os09g29850
CS-PBP-ind-Nip-F1	OD	Chr9_19182296	9	17743904	19742991	0.629735	2.05868	3.37804	LOC_Os09g32440	1	1
CS-PBP-ind-Nip-F1	OD	Chr9_19182296	9	17743904	19742991	0.629735	2.05868	3.37804	LOC_Os09g32984
CS-PBP-ind-Nip-F1	OD	Chr9_19182296	9	17743904	19742991	0.629735	2.05868	3.37804	LOC_Os09g32274	1	1
CS-PBP-ind-Nip-F1	OD	Chr9_19182296	9	17743904	19742991	0.629735	2.05868	3.37804	LOC_Os09g30180	1	1
CS-PBP-ind-Nip-F1	OD	Chr9_19182296	9	17743904	19742991	0.629735	2.05868	3.37804	LOC_Os09g32050	1					P2NOD	NoDiff
CS-PBP-ind-Nip-F1	OD	Chr9_19182296	9	17743904	19742991	0.629735	2.05868	3.37804	LOC_Os09g31340
CS-PBP-ind-Nip-F1	OD	Chr9_19182296	9	17743904	19742991	0.629735	2.05868	3.37804	LOC_Os09g31482	1
CS-PBP-ind-Nip-F1	OD	Chr9_19182296	9	17743904	19742991	0.629735	2.05868	3.37804	LOC_Os09g29960	1				P2MP
CS-PBP-ind-Nip-F1	OD	Chr9_19182296	9	17743904	19742991	0.629735	2.05868	3.37804	LOC_Os09g32800	1	1
CS-PBP-ind-Nip-F1	OD	Chr9_19182296	9	17743904	19742991	0.629735	2.05868	3.37804	LOC_Os09g32270	1							P2BLP
CS-PBP-ind-Nip-F1	OD	Chr9_19182296	9	17743904	19742991	0.629735	2.05868	3.37804	LOC_Os09g32080	1
CS-PBP-ind-Nip-F1	OD	Chr9_19182296	9	17743904	19742991	0.629735	2.05868	3.37804	LOC_Os09g32992	1							P1LP
CS-PBP-ind-Nip-F1	OD	Chr9_19182296	9	17743904	19742991	0.629735	2.05868	3.37804	LOC_Os09g32010	1
CS-PBP-ind-Nip-F1	OD	Chr9_19182296	9	17743904	19742991	0.629735	2.05868	3.37804	LOC_Os09g32560	1							P2LP
CS-PBP-ind-Nip-F1	OD	Chr9_19182296	9	17743904	19742991	0.629735	2.05868	3.37804	LOC_Os09g31446	1							P1HP
CS-PBP-ind-Nip-F1	OD	Chr9_19182296	9	17743904	19742991	0.629735	2.05868	3.37804	LOC_Os09g31400
CS-PBP-ind-Nip-F1	OD	Chr9_19182296	9	17743904	19742991	0.629735	2.05868	3.37804	LOC_Os09g32040
CS-PBP-ind-Nip-F1	OD	Chr9_19182296	9	17743904	19742991	0.629735	2.05868	3.37804	LOC_Os09g30240
CS-PBP-ind-Nip-F1	OD	Chr9_19182296	9	17743904	19742991	0.629735	2.05868	3.37804	LOC_Os09g32450	1	1						P1LP
CS-PBP-ind-Nip-F1	OD	Chr9_19182296	9	17743904	19742991	0.629735	2.05868	3.37804	LOC_Os09g32600	1	1
CS-PBP-ind-Nip-F1	OD	Chr9_19182296	9	17743904	19742991	0.629735	2.05868	3.37804	LOC_Os09g31250
CS-PBP-ind-Nip-F1	OD	Chr9_19182296	9	17743904	19742991	0.629735	2.05868	3.37804	LOC_Os09g29870
CS-PBP-ind-Nip-F1	OD	Chr9_19182296	9	17743904	19742991	0.629735	2.05868	3.37804	LOC_Os09g31031	1	1
CS-PBP-ind-Nip-F1	OD	Chr9_19182296	9	17743904	19742991	0.629735	2.05868	3.37804	LOC_Os09g32570
CS-PBP-ind-Nip-F1	OD	Chr9_19182296	9	17743904	19742991	0.629735	2.05868	3.37804	LOC_Os09g32750	1	1
CS-PBP-ind-Nip-F1	OD	Chr9_19182296	9	17743904	19742991	0.629735	2.05868	3.37804	LOC_Os09g32820	1	1
CS-PBP-ind-Nip-F1	OD	Chr9_19182296	9	17743904	19742991	0.629735	2.05868	3.37804	LOC_Os09g31502	1						P2PD	P2HP
CS-PBP-ind-Nip-F1	OD	Chr9_19182296	9	17743904	19742991	0.629735	2.05868	3.37804	LOC_Os09g32700	1	1
CS-PBP-ind-Nip-F1	OD	Chr9_19182296	9	17743904	19742991	0.629735	2.05868	3.37804	LOC_Os09g32070
CS-PBP-ind-Nip-F1	OD	Chr9_19182296	9	17743904	19742991	0.629735	2.05868	3.37804	LOC_Os09g32490					NoDiff	P2PD	P2POD
CS-PBP-ind-Nip-F1	OD	Chr9_19182296	9	17743904	19742991	0.629735	2.05868	3.37804	LOC_Os09g32680	1
CS-PBP-ind-Nip-F1	OD	Chr9_19182296	9	17743904	19742991	0.629735	2.05868	3.37804	LOC_Os09g32840
CS-PBP-ind-Nip-F1	OD	Chr9_19182296	9	17743904	19742991	0.629735	2.05868	3.37804	LOC_Os09g33480	1	1
CS-PBP-ind-Nip-F1	OD	Chr9_19182296	9	17743904	19742991	0.629735	2.05868	3.37804	LOC_Os09g29860
CS-PBP-ind-Nip-F1	OD	Chr9_19182296	9	17743904	19742991	0.629735	2.05868	3.37804	LOC_Os09g32095
CS-PBP-ind-Nip-F1	OD	Chr9_19182296	9	17743904	19742991	0.629735	2.05868	3.37804	LOC_Os09g32350					NoDiff	NoDiff	CNOD
CS-PBP-ind-Nip-F1	OD	Chr9_19182296	9	17743904	19742991	0.629735	2.05868	3.37804	LOC_Os09g31220	1	1
CS-PBP-ind-Nip-F1	OD	Chr9_19182296	9	17743904	19742991	0.629735	2.05868	3.37804	LOC_Os09g29890	1
CS-PBP-ind-Nip-F1	OD	Chr9_19182296	9	17743904	19742991	0.629735	2.05868	3.37804	LOC_Os09g32940	1	1
CS-PBP-ind-Nip-F1	OD	Chr9_19182296	9	17743904	19742991	0.629735	2.05868	3.37804	LOC_Os09g32000
CS-PBP-ind-Nip-F1	OD	Chr9_19182296	9	17743904	19742991	0.629735	2.05868	3.37804	LOC_Os09g32300	1	1
CS-PBP-ind-Nip-F1	OD	Chr9_19182296	9	17743904	19742991	0.629735	2.05868	3.37804	LOC_Os09g31470	1				P2POD	NoDiff	NoDiff	P2LP
CS-PBP-ind-Nip-F1	OD	Chr9_19182296	9	17743904	19742991	0.629735	2.05868	3.37804	LOC_Os09g31438	1				P2NPD	P2MP	NoDiff	P1OHP
CS-PBP-ind-Nip-F1	OD	Chr9_19182296	9	17743904	19742991	0.629735	2.05868	3.37804	LOC_Os09g31410
CS-PBP-ind-Nip-F1	OD	Chr9_19182296	9	17743904	19742991	0.629735	2.05868	3.37804	LOC_Os09g31420
CS-PBP-ind-Nip-F1	OD	Chr9_19182296	9	17743904	19742991	0.629735	2.05868	3.37804	LOC_Os09g32944	1	1			NoDiff	NoDiff	P1NOD
CS-PBP-ind-Nip-F1	OD	Chr9_19182296	9	17743904	19742991	0.629735	2.05868	3.37804	LOC_Os09g32740	1	1
CS-PBP-ind-Nip-F1	OD	Chr9_19182296	9	17743904	19742991	0.629735	2.05868	3.37804	LOC_Os09g30270	1	1
CS-PBP-ind-Nip-F1	OD	Chr9_19182296	9	17743904	19742991	0.629735	2.05868	3.37804	LOC_Os09g32510	1				P2ND	NoDiff	NoDiff
CS-PBP-ind-Nip-F1	OD	Chr9_19182296	9	17743904	19742991	0.629735	2.05868	3.37804	LOC_Os09g31514
CS-PBP-ind-Nip-F1	OD	Chr9_19182296	9	17743904	19742991	0.629735	2.05868	3.37804	LOC_Os09g32020	1	1
CS-PBP-ind-Nip-F1	OD	Chr9_19182296	9	17743904	19742991	0.629735	2.05868	3.37804	LOC_Os09g32770
CS-PBP-ind-Nip-F1	OD	Chr9_19182296	9	17743904	19742991	0.629735	2.05868	3.37804	LOC_Os09g32060
CS-PBP-ind-Nip-F1	OD	Chr9_19182296	9	17743904	19742991	0.629735	2.05868	3.37804	LOC_Os09g31486	1				P2PD	P1NOD	P2ND
CS-PBP-ind-Nip-F1	OD	Chr9_19182296	9	17743904	19742991	0.629735	2.05868	3.37804	LOC_Os09g31490	1					NoDiff	P1MP
CS-PBP-ind-Nip-F1	OD	Chr9_19182296	9	17743904	19742991	0.629735	2.05868	3.37804	LOC_Os09g32190
CS-PBP-ind-Nip-F1	OD	Chr9_19182296	9	17743904	19742991	0.629735	2.05868	3.37804	LOC_Os09g32690
CS-PBP-ind-Nip-F1	OD	Chr9_19182296	9	17743904	19742991	0.629735	2.05868	3.37804	LOC_Os09g32670	1							P1HP
CS-PBP-ind-Nip-F1	OD	Chr9_19182296	9	17743904	19742991	0.629735	2.05868	3.37804	LOC_Os09g30220	1	1
CS-PBP-ind-Nip-F1	OD	Chr9_19182296	9	17743904	19742991	0.629735	2.05868	3.37804	LOC_Os09g32620
CS-PBP-ind-Nip-F1	OD	Chr9_19182296	9	17743904	19742991	0.629735	2.05868	3.37804	LOC_Os09g31120
CS-PBP-ind-Nip-F1	OD	Chr9_19182296	9	17743904	19742991	0.629735	2.05868	3.37804	LOC_Os09g32810	1				NoDiff	P2PD	NoDiff	P1OHP
CS-PBP-ind-Nip-F1	OD	Chr9_19182296	9	17743904	19742991	0.629735	2.05868	3.37804	LOC_Os09g32090	1
CS-PBP-ind-Nip-F1	OD	Chr9_19182296	9	17743904	19742991	0.629735	2.05868	3.37804	LOC_Os09g32988	1	1
CS-PBP-ind-Nip-F1	OD	Chr9_19182296	9	17743904	19742991	0.629735	2.05868	3.37804	LOC_Os09g32370
CS-PBP-ind-Nip-F1	OD	Chr9_19182296	9	17743904	19742991	0.629735	2.05868	3.37804	LOC_Os09g31040	1
CS-PBP-ind-Nip-F1	OD	Chr9_19182296	9	17743904	19742991	0.629735	2.05868	3.37804	LOC_Os09g30300	1
CS-PBP-ind-Nip-F1	OD	Chr9_19182296	9	17743904	19742991	0.629735	2.05868	3.37804	LOC_Os09g30990
CS-PBP-ind-Nip-F1	OD	Chr9_19182296	9	17743904	19742991	0.629735	2.05868	3.37804	LOC_Os09g32480
CS-PBP-ind-Nip-F1	OD	Chr9_19182296	9	17743904	19742991	0.629735	2.05868	3.37804	LOC_Os09g31330
CS-PBP-ind-Nip-F1	OD	Chr9_19182296	9	17743904	19742991	0.629735	2.05868	3.37804	LOC_Os09g29970	1	1
CS-PBP-ind-Nip-F1	OD	Chr9_19182296	9	17743904	19742991	0.629735	2.05868	3.37804	LOC_Os09g31160
CS-PBP-ind-Nip-F1	OD	Chr9_19182296	9	17743904	19742991	0.629735	2.05868	3.37804	LOC_Os09g32830
CS-PBP-ind-Nip-F1	OD	Chr9_19182296	9	17743904	19742991	0.629735	2.05868	3.37804	LOC_Os09g32240	1							P2LP
CS-PBP-ind-Nip-F1	OD	Chr9_19182296	9	17743904	19742991	0.629735	2.05868	3.37804	LOC_Os09g32960
CS-PBP-ind-Nip-F1	OD	Chr9_19182296	9	17743904	19742991	0.629735	2.05868	3.37804	LOC_Os09g32968	1	1
CS-PBP-ind-Nip-F1	OD	Chr9_19182296	9	17743904	19742991	0.629735	2.05868	3.37804	LOC_Os09g32200	1	1						P1LP
CS-PBP-ind-Nip-F1	OD	Chr9_19182296	9	17743904	19742991	0.629735	2.05868	3.37804	LOC_Os09g31100
CS-PBP-ind-Nip-F1	OD	Chr9_19182296	9	17743904	19742991	0.629735	2.05868	3.37804	LOC_Os09g32550	1	1						P1HP
CS-PBP-ind-Nip-F1	OD	Chr9_19182296	9	17743904	19742991	0.629735	2.05868	3.37804	LOC_Os09g32956
CS-PBP-ind-Nip-F1	OD	Chr9_19182296	9	17743904	19742991	0.629735	2.05868	3.37804	LOC_Os09g32220	1
CS-PBP-ind-Nip-F1	OD	Chr9_19182296	9	17743904	19742991	0.629735	2.05868	3.37804	LOC_Os09g30486
CS-PBP-ind-Nip-F1	OD	Chr9_19182296	9	17743904	19742991	0.629735	2.05868	3.37804	LOC_Os09g32260
CS-PBP-ind-Nip-F1	OD	Chr9_19182296	9	17743904	19742991	0.629735	2.05868	3.37804	LOC_Os09g32952
CS-PBP-ind-Nip-F1	OD	Chr9_19182296	9	17743904	19742991	0.629735	2.05868	3.37804	LOC_Os09g33470	1				P1PD	NoDiff
CS-PBP-ind-Nip-F1	OD	Chr9_19182296	9	17743904	19742991	0.629735	2.05868	3.37804	LOC_Os09g30510
CS-PBP-ind-Nip-F1	OD	Chr9_19182296	9	17743904	19742991	0.629735	2.05868	3.37804	LOC_Os09g31522
CS-PBP-ind-Nip-F1	OD	Chr9_19182296	9	17743904	19742991	0.629735	2.05868	3.37804	LOC_Os09g30980	1
CS-PBP-ind-Nip-F1	OD	Chr9_19182296	9	17743904	19742991	0.629735	2.05868	3.37804	LOC_Os09g30454
CS-PBP-ind-Nip-F1	OD	Chr9_19182296	9	17743904	19742991	0.629735	2.05868	3.37804	LOC_Os09g31478	1
CS-PBP-ind-Nip-F1	OD	Chr9_19182296	9	17743904	19742991	0.629735	2.05868	3.37804	LOC_Os09g32860	1
CS-PBP-ind-Nip-F1	OD	Chr9_19182296	9	17743904	19742991	0.629735	2.05868	3.37804	LOC_Os09g32030
CS-PBP-ind-Nip-F1	OD	Chr9_19182296	9	17743904	19742991	0.629735	2.05868	3.37804	LOC_Os09g31390					CPOD	NoDiff	NoDiff
CS-PBP-ind-Nip-F1	OD	Chr9_19182296	9	17743904	19742991	0.629735	2.05868	3.37804	LOC_Os09g32976	1	1
CS-PBP-ind-Nip-F1	OD	Chr9_19182296	9	17743904	19742991	0.629735	2.05868	3.37804	LOC_Os09g29920
CS-PBP-ind-Nip-F1	OD	Chr9_19182296	9	17743904	19742991	0.629735	2.05868	3.37804	LOC_Os09g32320	1
CS-PBP-ind-Nip-F1	OD	Chr9_19182296	9	17743904	19742991	0.629735	2.05868	3.37804	LOC_Os09g32430	1
CS-PBP-ind-Nip-F1	OD	Chr9_19182296	9	17743904	19742991	0.629735	2.05868	3.37804	LOC_Os09g30020
CS-PBP-ind-Nip-F1	OD	Chr9_19182296	9	17743904	19742991	0.629735	2.05868	3.37804	LOC_Os09g30466
CS-PBP-ind-Nip-F1	OD	Chr9_19182296	9	17743904	19742991	0.629735	2.05868	3.37804	LOC_Os09g31200	1							P2HP
CS-PBP-ind-Nip-F1	OD	Chr9_19182296	9	17743904	19742991	0.629735	2.05868	3.37804	LOC_Os09g30330	1	1
CS-PBP-ind-Nip-F1	OD	Chr9_19182296	9	17743904	19742991	0.629735	2.05868	3.37804	LOC_Os09g32650	1	1
CS-PBP-ind-Nip-F1	OD	Chr9_19182296	9	17743904	19742991	0.629735	2.05868	3.37804	LOC_Os09g31170					P1ND	CNOD	NoDiff
CS-PBP-ind-Nip-F1	OD	Chr9_19182296	9	17743904	19742991	0.629735	2.05868	3.37804	LOC_Os09g31080	1				NoDiff	NoDiff	P1ND	P1OHP
CS-PBP-ind-Nip-F1	OD	Chr9_19182296	9	17743904	19742991	0.629735	2.05868	3.37804	LOC_Os09g30280	1	1
CS-PBP-ind-Nip-F1	OD	Chr9_19182296	9	17743904	19742991	0.629735	2.05868	3.37804	LOC_Os09g31990
CS-PBP-ind-Nip-F1	OD	Chr9_19182296	9	17743904	19742991	0.629735	2.05868	3.37804	LOC_Os09g32850
CS-PBP-ind-Nip-F1	OD	Chr9_19182296	9	17743904	19742991	0.629735	2.05868	3.37804	LOC_Os09g32130	1
CS-PBP-ind-Nip-F1	OD	Chr9_19182296	9	17743904	19742991	0.629735	2.05868	3.37804	LOC_Os09g31518
CS-PBP-ind-Nip-F1	OD	Chr9_19182296	9	17743904	19742991	0.629735	2.05868	3.37804	LOC_Os09g32470	1
CS-PBP-ind-Nip-F1	OD	Chr9_19182296	9	17743904	19742991	0.629735	2.05868	3.37804	LOC_Os09g32520	1				NoDiff	NoDiff	P1ND	P2OHP
CS-PBP-ind-Nip-F1	OD	Chr9_19182296	9	17743904	19742991	0.629735	2.05868	3.37804	LOC_Os09g32290
CS-PBP-ind-Nip-F1	OD	Chr9_19182296	9	17743904	19742991	0.629735	2.05868	3.37804	LOC_Os09g32100
CS-PBP-ind-Nip-F1	OD	Chr9_19182296	9	17743904	19742991	0.629735	2.05868	3.37804	LOC_Os09g30502
CS-PBP-ind-Nip-F1	OD	Chr9_19182296	9	17743904	19742991	0.629735	2.05868	3.37804	LOC_Os09g32964	1
CS-PBP-ind-Nip-F1	OD	Chr9_19182296	9	17743904	19742991	0.629735	2.05868	3.37804	LOC_Os09g31130
CS-PBP-ind-Nip-F1	OD	Chr9_19182296	9	17743904	19742991	0.629735	2.05868	3.37804	LOC_Os09g32280
CS-PBP-ind-Nip-F1	OD	Chr9_19182296	9	17743904	19742991	0.629735	2.05868	3.37804	LOC_Os09g32025
CS-PBP-ind-Nip-F1	OD	Chr9_19182296	9	17743904	19742991	0.629735	2.05868	3.37804	LOC_Os09g30446
CS-PBP-ind-Nip-F1	OD	Chr9_19182296	9	17743904	19742991	0.629735	2.05868	3.37804	LOC_Os09g30200	1	1						P1LP
CS-PBP-ind-Nip-F1	OD	Chr9_19182296	9	17743904	19742991	0.629735	2.05868	3.37804	LOC_Os09g31280	1							P1HP
CS-PBP-ind-Nip-F1	OD	Chr9_19182296	9	17743904	19742991	0.629735	2.05868	3.37804	LOC_Os09g32910	1	1
CS-PBP-ind-Nip-F1	OD	Chr9_19182296	9	17743904	19742991	0.629735	2.05868	3.37804	LOC_Os09g32540	1	1						P1BLP
CS-PBP-ind-Nip-F1	OD	Chr9_19182296	9	17743904	19742991	0.629735	2.05868	3.37804	LOC_Os09g32532	1	1			P2PD	NoDiff		P1OHP
CS-PBP-ind-Nip-F1	OD	Chr9_19182296	9	17743904	19742991	0.629735	2.05868	3.37804	LOC_Os09g31000
CS-PBP-ind-Nip-F1	OD	Chr9_19182296	9	17743904	19742991	0.629735	2.05868	3.37804	LOC_Os09g31090
CS-PBP-ind-Nip-F1	OD	Chr9_19182296	9	17743904	19742991	0.629735	2.05868	3.37804	LOC_Os09g32340
CS-PBP-ind-Nip-F1	OD	Chr9_19182296	9	17743904	19742991	0.629735	2.05868	3.37804	LOC_Os09g31350	1	1
CS-PBP-ind-Nip-F1	OD	Chr9_19182296	9	17743904	19742991	0.629735	2.05868	3.37804	LOC_Os09g31434					P2MP		NoDiff
CS-PBP-ind-Nip-F1	OD	Chr9_19182296	9	17743904	19742991	0.629735	2.05868	3.37804	LOC_Os09g30970
CS-PBP-ind-Nip-F1	OD	Chr9_19182296	9	17743904	19742991	0.629735	2.05868	3.37804	LOC_Os09g31180	1
CS-PBP-ind-Nip-F1	OD	Chr9_19182296	9	17743904	19742991	0.629735	2.05868	3.37804	LOC_Os09g30490
CS-PBP-ind-Nip-F1	OD	Chr9_19182296	9	17743904	19742991	0.629735	2.05868	3.37804	LOC_Os09g32330	1	1			NoDiff	NoDiff	P1NOD	P1BLP
CS-PBP-ind-Nip-F1	OD	Chr9_19182296	9	17743904	19742991	0.629735	2.05868	3.37804	LOC_Os09g32410	1	1			NoDiff	P2PD	NoDiff	P2LP
CS-PBP-ind-Nip-F1	OD	Chr9_19182296	9	17743904	19742991	0.629735	2.05868	3.37804	LOC_Os09g31210	1	1			NoDiff	NoDiff	P1NOD
CS-PBP-ind-Nip-F1	OD	Chr9_19182296	9	17743904	19742991	0.629735	2.05868	3.37804	LOC_Os09g31300	1							P1BLP
CS-PBP-ind-Nip-F1	OD	Chr9_19182296	9	17743904	19742991	0.629735	2.05868	3.37804	LOC_Os09g30170
CS-PBP-ind-Nip-F1	OD	Chr9_19182296	9	17743904	19742991	0.629735	2.05868	3.37804	LOC_Os09g31380	1
CS-PBP-ind-Nip-F1	OD	Chr9_19182296	9	17743904	19742991	0.629735	2.05868	3.37804	LOC_Os09g31360
CS-PBP-ind-Nip-F1	OD	Chr9_19182296	9	17743904	19742991	0.629735	2.05868	3.37804	LOC_Os09g31506
CS-PBP-ind-Nip-F1	OD	Chr9_19182296	9	17743904	19742991	0.629735	2.05868	3.37804	LOC_Os09g31370	1	1			NoDiff	NoDiff	P1NOD
CS-PBP-ind-Nip-F1	OD	Chr9_19182296	9	17743904	19742991	0.629735	2.05868	3.37804	LOC_Os09g32972
CS-PBP-ind-Nip-F1	OD	Chr9_19182296	9	17743904	19742991	0.629735	2.05868	3.37804	LOC_Os09g29190	1				P1POD	NoDiff	NoDiff
CS-PBP-ind-Nip-F1	OD	Chr9_19182296	9	17743904	19742991	0.629735	2.05868	3.37804	LOC_Os09g30260
CS-PBP-ind-Nip-F1	OD	Chr9_19182296	9	17743904	19742991	0.629735	2.05868	3.37804	LOC_Os09g31430	1							P1OHP
CS-PBP-ind-Nip-F1	OD	Chr9_19182296	9	17743904	19742991	0.629735	2.05868	3.37804	LOC_Os09g32780	1				NoDiff	NoDiff	P1ND
CS-PBP-ind-Nip-F1	OD	Chr9_19182296	9	17743904	19742991	0.629735	2.05868	3.37804	LOC_Os09g32360	1	1			NoDiff		P2NOD
CS-PBP-ind-Nip-F1	OD	Chr9_19182296	9	17743904	19742991	0.629735	2.05868	3.37804	LOC_Os09g31290					NoDiff	NoDiff	CPOD
CS-PBP-ind-Nip-F1	OD	Chr9_19182296	9	17743904	19742991	0.629735	2.05868	3.37804	LOC_Os09g31980
CS-PBP-ind-Nip-F1	OD	Chr9_19182296	9	17743904	19742991	0.629735	2.05868	3.37804	LOC_Os09g32380	1							P1LP
CS-PBP-ind-Nip-F1	OD	Chr9_19182296	9	17743904	19742991	0.629735	2.05868	3.37804	LOC_Os09g32930	1	1			P2POD
CS-PBP-ind-Nip-F1	OD	Chr9_19182296	9	17743904	19742991	0.629735	2.05868	3.37804	LOC_Os09g31498	1
CS-PBP-ind-Nip-F1	OD	Chr9_19182296	9	17743904	19742991	0.629735	2.05868	3.37804	LOC_Os09g32400
CS-PBP-ind-Nip-F1	OD	Chr9_19182296	9	17743904	19742991	0.629735	2.05868	3.37804	LOC_Os09g32630
CS-PBP-ind-Nip-F1	OD	Chr9_19182296	9	17743904	19742991	0.629735	2.05868	3.37804	LOC_Os09g29880
CS-PBP-ind-Nip-F1	OD	Chr9_19182296	9	17743904	19742991	0.629735	2.05868	3.37804	LOC_Os09g31970	1
CS-PBP-ind-Nip-F1	OD	Chr9_20351810	9	20265839	20466533	0.843355	3.2535	3.86687	LOC_Os09g34920	1
CS-PBP-ind-Nip-F1	OD	Chr9_20351810	9	20265839	20466533	0.843355	3.2535	3.86687	LOC_Os09g34850	1
CS-PBP-ind-Nip-F1	OD	Chr9_20351810	9	20265839	20466533	0.843355	3.2535	3.86687	LOC_Os09g34860
CS-PBP-ind-Nip-F1	OD	Chr9_20351810	9	20265839	20466533	0.843355	3.2535	3.86687	LOC_Os09g35540	1	1			P1POD		NoDiff
CS-PBP-ind-Nip-F1	OD	Chr9_20351810	9	20265839	20466533	0.843355	3.2535	3.86687	LOC_Os09g34990					NoDiff	P2ND	NoDiff
CS-PBP-ind-Nip-HV	OD	Chr1_14791458	1	14790062	15097664	0.307797	0.703665	2.28613	LOC_Os01g26250
CS-PBP-ind-Nip-HV	OD	Chr1_14791458	1	14790062	15097664	0.307797	0.703665	2.28613	LOC_Os01g26120
CS-PBP-ind-Nip-HV	OD	Chr1_14791458	1	14790062	15097664	0.307797	0.703665	2.28613	LOC_Os01g26110
CS-PBP-ind-Nip-HV	OD	Chr1_22477195	1	22383467	22603535	0.0605177	-1.35652	-22.4153	LOC_Os01g39690
CS-PBP-ind-Nip-HV	OD	Chr1_22477195	1	22383467	22603535	0.0605177	-1.35652	-22.4153	LOC_Os01g39830	1	1			NoDiff	NoDiff	P1ND	P1BLP
CS-PBP-ind-Nip-HV	OD	Chr1_22477195	1	22383467	22603535	0.0605177	-1.35652	-22.4153	LOC_Os01g40070	1
CS-PBP-ind-Nip-HV	OD	Chr1_22477195	1	22383467	22603535	0.0605177	-1.35652	-22.4153	LOC_Os01g39820					P2MP	NoDiff	NoDiff
CS-PBP-ind-Nip-HV	OD	Chr1_22477195	1	22383467	22603535	0.0605177	-1.35652	-22.4153	LOC_Os01g39850
CS-PBP-ind-Nip-HV	OD	Chr1_36499232	1	36456063	36648519	0.441115	1.1049	2.50479	LOC_Os01g63200
CS-PBP-ind-Nip-HV	OD	Chr1_36499232	1	36456063	36648519	0.441115	1.1049	2.50479	LOC_Os01g63060
CS-PBP-ind-Nip-HV	OD	Chr1_36499232	1	36456063	36648519	0.441115	1.1049	2.50479	LOC_Os01g62950
CS-PBP-ind-Nip-HV	OD	Chr1_36499232	1	36456063	36648519	0.441115	1.1049	2.50479	LOC_Os01g63080	1
CS-PBP-ind-Nip-HV	OD	Chr1_36499232	1	36456063	36648519	0.441115	1.1049	2.50479	LOC_Os01g63180
CS-PBP-ind-Nip-HV	OD	Chr1_36499232	1	36456063	36648519	0.441115	1.1049	2.50479	LOC_Os01g63230					NoDiff	NoDiff	P1PD
CS-PBP-ind-Nip-HV	OD	Chr1_36499232	1	36456063	36648519	0.441115	1.1049	2.50479	LOC_Os01g63010
CS-PBP-ind-Nip-HV	OD	Chr1_36499232	1	36456063	36648519	0.441115	1.1049	2.50479	LOC_Os01g63040
CS-PBP-ind-Nip-HV	OD	Chr1_36499232	1	36456063	36648519	0.441115	1.1049	2.50479	LOC_Os01g63020
CS-PBP-ind-Nip-HV	OD	Chr1_36499232	1	36456063	36648519	0.441115	1.1049	2.50479	LOC_Os01g62970
CS-PBP-ind-Nip-HV	OD	Chr1_37158922	1	36679034	38671411	0.404585	1.15403	2.85239	LOC_Os01g65030
CS-PBP-ind-Nip-HV	OD	Chr1_37158922	1	36679034	38671411	0.404585	1.15403	2.85239	LOC_Os01g66190	1	1			P1NOD	NoDiff		P2BLP
CS-PBP-ind-Nip-HV	OD	Chr1_37158922	1	36679034	38671411	0.404585	1.15403	2.85239	LOC_Os01g63820	1	1						P1LP
CS-PBP-ind-Nip-HV	OD	Chr1_37158922	1	36679034	38671411	0.404585	1.15403	2.85239	LOC_Os01g65790	1	1
CS-PBP-ind-Nip-HV	OD	Chr1_37158922	1	36679034	38671411	0.404585	1.15403	2.85239	LOC_Os01g65169
CS-PBP-ind-Nip-HV	OD	Chr1_37158922	1	36679034	38671411	0.404585	1.15403	2.85239	LOC_Os01g64690	1	1
CS-PBP-ind-Nip-HV	OD	Chr1_37158922	1	36679034	38671411	0.404585	1.15403	2.85239	LOC_Os01g63840	1	1
CS-PBP-ind-Nip-HV	OD	Chr1_37158922	1	36679034	38671411	0.404585	1.15403	2.85239	LOC_Os01g66290
CS-PBP-ind-Nip-HV	OD	Chr1_37158922	1	36679034	38671411	0.404585	1.15403	2.85239	LOC_Os01g65420	1	1						P2OHP
CS-PBP-ind-Nip-HV	OD	Chr1_37158922	1	36679034	38671411	0.404585	1.15403	2.85239	LOC_Os01g65880	1
CS-PBP-ind-Nip-HV	OD	Chr1_37158922	1	36679034	38671411	0.404585	1.15403	2.85239	LOC_Os01g63720
CS-PBP-ind-Nip-HV	OD	Chr1_37158922	1	36679034	38671411	0.404585	1.15403	2.85239	LOC_Os01g63910	1	1			NoDiff	P1PD	P2PD	P2BLP
CS-PBP-ind-Nip-HV	OD	Chr1_37158922	1	36679034	38671411	0.404585	1.15403	2.85239	LOC_Os01g64200
CS-PBP-ind-Nip-HV	OD	Chr1_37158922	1	36679034	38671411	0.404585	1.15403	2.85239	LOC_Os01g63690	1	1
CS-PBP-ind-Nip-HV	OD	Chr1_37158922	1	36679034	38671411	0.404585	1.15403	2.85239	LOC_Os01g66100	1
CS-PBP-ind-Nip-HV	OD	Chr1_37158922	1	36679034	38671411	0.404585	1.15403	2.85239	LOC_Os01g64370	1
CS-PBP-ind-Nip-HV	OD	Chr1_37158922	1	36679034	38671411	0.404585	1.15403	2.85239	LOC_Os01g64120
CS-PBP-ind-Nip-HV	OD	Chr1_37158922	1	36679034	38671411	0.404585	1.15403	2.85239	LOC_Os01g63610
CS-PBP-ind-Nip-HV	OD	Chr1_37158922	1	36679034	38671411	0.404585	1.15403	2.85239	LOC_Os01g63400	1	1
CS-PBP-ind-Nip-HV	OD	Chr1_37158922	1	36679034	38671411	0.404585	1.15403	2.85239	LOC_Os01g64180	1	1
CS-PBP-ind-Nip-HV	OD	Chr1_37158922	1	36679034	38671411	0.404585	1.15403	2.85239	LOC_Os01g63800	1
CS-PBP-ind-Nip-HV	OD	Chr1_37158922	1	36679034	38671411	0.404585	1.15403	2.85239	LOC_Os01g63890	1
CS-PBP-ind-Nip-HV	OD	Chr1_37158922	1	36679034	38671411	0.404585	1.15403	2.85239	LOC_Os01g65830	1							P2HP
CS-PBP-ind-Nip-HV	OD	Chr1_37158922	1	36679034	38671411	0.404585	1.15403	2.85239	LOC_Os01g64790
CS-PBP-ind-Nip-HV	OD	Chr1_37158922	1	36679034	38671411	0.404585	1.15403	2.85239	LOC_Os01g66180	1	1						P1HP
CS-PBP-ind-Nip-HV	OD	Chr1_37158922	1	36679034	38671411	0.404585	1.15403	2.85239	LOC_Os01g64990	1							P2LP
CS-PBP-ind-Nip-HV	OD	Chr1_37158922	1	36679034	38671411	0.404585	1.15403	2.85239	LOC_Os01g64540							P2ND
CS-PBP-ind-Nip-HV	OD	Chr1_37158922	1	36679034	38671411	0.404585	1.15403	2.85239	LOC_Os01g64110	1
CS-PBP-ind-Nip-HV	OD	Chr1_37158922	1	36679034	38671411	0.404585	1.15403	2.85239	LOC_Os01g63900	1							P2BLP
CS-PBP-ind-Nip-HV	OD	Chr1_37158922	1	36679034	38671411	0.404585	1.15403	2.85239	LOC_Os01g65730	1	1
CS-PBP-ind-Nip-HV	OD	Chr1_37158922	1	36679034	38671411	0.404585	1.15403	2.85239	LOC_Os01g63540
CS-PBP-ind-Nip-HV	OD	Chr1_37158922	1	36679034	38671411	0.404585	1.15403	2.85239	LOC_Os01g63854
CS-PBP-ind-Nip-HV	OD	Chr1_37158922	1	36679034	38671411	0.404585	1.15403	2.85239	LOC_Os01g64850
CS-PBP-ind-Nip-HV	OD	Chr1_37158922	1	36679034	38671411	0.404585	1.15403	2.85239	LOC_Os01g64000	1							P1LP
CS-PBP-ind-Nip-HV	OD	Chr1_37158922	1	36679034	38671411	0.404585	1.15403	2.85239	LOC_Os01g63410	1
CS-PBP-ind-Nip-HV	OD	Chr1_37158922	1	36679034	38671411	0.404585	1.15403	2.85239	LOC_Os01g64560	1	1						P2BLP
CS-PBP-ind-Nip-HV	OD	Chr1_37158922	1	36679034	38671411	0.404585	1.15403	2.85239	LOC_Os01g63670
CS-PBP-ind-Nip-HV	OD	Chr1_37158922	1	36679034	38671411	0.404585	1.15403	2.85239	LOC_Os01g64710
CS-PBP-ind-Nip-HV	OD	Chr1_37158922	1	36679034	38671411	0.404585	1.15403	2.85239	LOC_Os01g64840
CS-PBP-ind-Nip-HV	OD	Chr1_37158922	1	36679034	38671411	0.404585	1.15403	2.85239	LOC_Os01g63920
CS-PBP-ind-Nip-HV	OD	Chr1_37158922	1	36679034	38671411	0.404585	1.15403	2.85239	LOC_Os01g63710	1	1
CS-PBP-ind-Nip-HV	OD	Chr1_37158922	1	36679034	38671411	0.404585	1.15403	2.85239	LOC_Os01g63770	1				NoDiff	P1POD	NoDiff
CS-PBP-ind-Nip-HV	OD	Chr1_37158922	1	36679034	38671411	0.404585	1.15403	2.85239	LOC_Os01g63370
CS-PBP-ind-Nip-HV	OD	Chr1_37158922	1	36679034	38671411	0.404585	1.15403	2.85239	LOC_Os01g64010	1
CS-PBP-ind-Nip-HV	OD	Chr1_37158922	1	36679034	38671411	0.404585	1.15403	2.85239	LOC_Os01g66060
CS-PBP-ind-Nip-HV	OD	Chr1_37158922	1	36679034	38671411	0.404585	1.15403	2.85239	LOC_Os01g63444	1	1
CS-PBP-ind-Nip-HV	OD	Chr1_37158922	1	36679034	38671411	0.404585	1.15403	2.85239	LOC_Os01g64630	1
CS-PBP-ind-Nip-HV	OD	Chr1_37158922	1	36679034	38671411	0.404585	1.15403	2.85239	LOC_Os01g63620	1							P2LP
CS-PBP-ind-Nip-HV	OD	Chr1_37158922	1	36679034	38671411	0.404585	1.15403	2.85239	LOC_Os01g64510					P2ND	NoDiff	NoDiff
CS-PBP-ind-Nip-HV	OD	Chr1_37158922	1	36679034	38671411	0.404585	1.15403	2.85239	LOC_Os01g65440	1	1
CS-PBP-ind-Nip-HV	OD	Chr1_37158922	1	36679034	38671411	0.404585	1.15403	2.85239	LOC_Os01g64730	1	1						P2LP
CS-PBP-ind-Nip-HV	OD	Chr1_37158922	1	36679034	38671411	0.404585	1.15403	2.85239	LOC_Os01g63430
CS-PBP-ind-Nip-HV	OD	Chr1_37158922	1	36679034	38671411	0.404585	1.15403	2.85239	LOC_Os01g63340	1
CS-PBP-ind-Nip-HV	OD	Chr1_37158922	1	36679034	38671411	0.404585	1.15403	2.85239	LOC_Os01g64350	1
CS-PBP-ind-Nip-HV	OD	Chr1_37158922	1	36679034	38671411	0.404585	1.15403	2.85239	LOC_Os01g64830
CS-PBP-ind-Nip-HV	OD	Chr1_37158922	1	36679034	38671411	0.404585	1.15403	2.85239	LOC_Os01g65210	1
CS-PBP-ind-Nip-HV	OD	Chr1_37158922	1	36679034	38671411	0.404585	1.15403	2.85239	LOC_Os01g64360	1
CS-PBP-ind-Nip-HV	OD	Chr1_37158922	1	36679034	38671411	0.404585	1.15403	2.85239	LOC_Os01g64550
CS-PBP-ind-Nip-HV	OD	Chr1_37158922	1	36679034	38671411	0.404585	1.15403	2.85239	LOC_Os01g63870	1	1
CS-PBP-ind-Nip-HV	OD	Chr1_37158922	1	36679034	38671411	0.404585	1.15403	2.85239	LOC_Os01g63830
CS-PBP-ind-Nip-HV	OD	Chr1_37158922	1	36679034	38671411	0.404585	1.15403	2.85239	LOC_Os01g64080	1				P2PD	NoDiff	NoDiff
CS-PBP-ind-Nip-HV	OD	Chr1_37158922	1	36679034	38671411	0.404585	1.15403	2.85239	LOC_Os01g66020	1	1
CS-PBP-ind-Nip-HV	OD	Chr1_37158922	1	36679034	38671411	0.404585	1.15403	2.85239	LOC_Os01g65320	1
CS-PBP-ind-Nip-HV	OD	Chr1_37158922	1	36679034	38671411	0.404585	1.15403	2.85239	LOC_Os01g63354	1	1
CS-PBP-ind-Nip-HV	OD	Chr1_38681527	1	38681502	38718612	0.388751	1.0764	2.76886	LOC_Os01g66650	1	1	LOC_Os1g6665					P1LP
CS-PBP-ind-Nip-HV	OD	Chr1_38681527	1	38681502	38718612	0.388751	1.0764	2.76886	LOC_Os01g66660	1
CS-PBP-ind-Nip-HV	OD	Chr1_38681527	1	38681502	38718612	0.388751	1.0764	2.76886	LOC_Os01g66600	1							P2LP
CS-PBP-ind-Nip-HV	OD	Chr10_2240708	10	2129194	2260716	0.512013	-0.816686	-1.59505	LOC_Os10g04720
CS-PBP-ind-Nip-HV	OD	Chr10_2240708	10	2129194	2260716	0.512013	-0.816686	-1.59505	LOC_Os10g04490
CS-PBP-ind-Nip-HV	OD	Chr10_2240708	10	2129194	2260716	0.512013	-0.816686	-1.59505	LOC_Os10g04700
CS-PBP-ind-Nip-HV	OD	Chr10_2240708	10	2129194	2260716	0.512013	-0.816686	-1.59505	LOC_Os10g04580
CS-PBP-ind-Nip-HV	OD	Chr10_2240708	10	2129194	2260716	0.512013	-0.816686	-1.59505	LOC_Os10g04690
CS-PBP-ind-Nip-HV	OD	Chr10_2240708	10	2129194	2260716	0.512013	-0.816686	-1.59505	LOC_Os10g04590	1	1
CS-PBP-ind-Nip-HV	OD	Chr10_2240708	10	2129194	2260716	0.512013	-0.816686	-1.59505	LOC_Os10g04730
CS-PBP-ind-Nip-HV	OD	Chr11_21392877	11	21373277	21461325	0.574547	1.06205	1.8485	LOC_Os11g36320
CS-PBP-ind-Nip-HV	OD	Chr11_21392877	11	21373277	21461325	0.574547	1.06205	1.8485	LOC_Os11g36300
CS-PBP-ind-Nip-HV	OD	Chr11_21392877	11	21373277	21461325	0.574547	1.06205	1.8485	LOC_Os11g36330
CS-PBP-ind-Nip-HV	OD	Chr12_17002145	12	17002136	17407680	0.296511	1.51747	5.11773	LOC_Os12g29340	1	1
CS-PBP-ind-Nip-HV	OD	Chr12_17002145	12	17002136	17407680	0.296511	1.51747	5.11773	LOC_Os12g29320
CS-PBP-ind-Nip-HV	OD	Chr12_450967	12	445113	458107	0.152227	1.33081	8.74224	LOC_Os12g01740
CS-PBP-ind-Nip-HV	OD	Chr12_450967	12	445113	458107	0.152227	1.33081	8.74224	LOC_Os12g01744	1
CS-PBP-ind-Nip-HV	OD	Chr12_450967	12	445113	458107	0.152227	1.33081	8.74224	LOC_Os12g01750
CS-PBP-ind-Nip-HV	D	Chr2_22224143	2	21841583	22262422	0.774935	1.09948	1.4188	LOC_Os02g36210
CS-PBP-ind-Nip-HV	D	Chr2_22224143	2	21841583	22262422	0.774935	1.09948	1.4188	LOC_Os02g36880
CS-PBP-ind-Nip-HV	D	Chr2_22224143	2	21841583	22262422	0.774935	1.09948	1.4188	LOC_Os02g36870	1
CS-PBP-ind-Nip-HV	OD	Chr2_29400579	2	28329017	30328978	0.27953	1.2413	4.44068	LOC_Os02g48860
CS-PBP-ind-Nip-HV	OD	Chr2_29400579	2	28329017	30328978	0.27953	1.2413	4.44068	LOC_Os02g48220
CS-PBP-ind-Nip-HV	OD	Chr2_29400579	2	28329017	30328978	0.27953	1.2413	4.44068	LOC_Os02g49630
CS-PBP-ind-Nip-HV	OD	Chr2_29400579	2	28329017	30328978	0.27953	1.2413	4.44068	LOC_Os02g46560	1	1						P1HP
CS-PBP-ind-Nip-HV	OD	Chr2_29400579	2	28329017	30328978	0.27953	1.2413	4.44068	LOC_Os02g46550
CS-PBP-ind-Nip-HV	OD	Chr2_29400579	2	28329017	30328978	0.27953	1.2413	4.44068	LOC_Os02g49620	1
CS-PBP-ind-Nip-HV	OD	Chr2_29400579	2	28329017	30328978	0.27953	1.2413	4.44068	LOC_Os02g48030
CS-PBP-ind-Nip-HV	OD	Chr2_29400579	2	28329017	30328978	0.27953	1.2413	4.44068	LOC_Os02g49390
CS-PBP-ind-Nip-HV	OD	Chr2_29400579	2	28329017	30328978	0.27953	1.2413	4.44068	LOC_Os02g49400	1
CS-PBP-ind-Nip-HV	OD	Chr3_10229072	3	10171068	10253933	0.565383	1.01956	1.80331	LOC_Os03g18160	1
CS-PBP-ind-Nip-HV	OD	Chr3_10229072	3	10171068	10253933	0.565383	1.01956	1.80331	LOC_Os03g18250
CS-PBP-ind-Nip-HV	OD	Chr3_10229072	3	10171068	10253933	0.565383	1.01956	1.80331	LOC_Os03g18264	1
CS-PBP-ind-Nip-HV	OD	Chr3_10260060	3	10255322	10297916	0.398967	0.741153	1.85768	LOC_Os03g18290	1							P1HP
CS-PBP-ind-Nip-HV	OD	Chr3_10260060	3	10255322	10297916	0.398967	0.741153	1.85768	LOC_Os03g18300
CS-PBP-ind-Nip-HV	OD	Chr3_10260060	3	10255322	10297916	0.398967	0.741153	1.85768	LOC_Os03g18310	1
CS-PBP-ind-Nip-HV	OD	Chr3_4670817	3	4344719	6107352	0.0315228	0.789888	25.0577	LOC_Os03g08520	1
CS-PBP-ind-Nip-HV	OD	Chr3_4670817	3	4344719	6107352	0.0315228	0.789888	25.0577	LOC_Os03g08550
CS-PBP-ind-Nip-HV	OD	Chr3_4670817	3	4344719	6107352	0.0315228	0.789888	25.0577	LOC_Os03g11614	1	1		OsMADS1; LHS1; AFO	NoDiff	NoDiff	P1MP	P2BLP
CS-PBP-ind-Nip-HV	OD	Chr3_4670817	3	4344719	6107352	0.0315228	0.789888	25.0577	LOC_Os03g08999
CS-PBP-ind-Nip-HV	OD	Chr3_4670817	3	4344719	6107352	0.0315228	0.789888	25.0577	LOC_Os03g08900
CS-PBP-ind-Nip-HV	OD	Chr3_4670817	3	4344719	6107352	0.0315228	0.789888	25.0577	LOC_Os03g11550	1	1
CS-PBP-ind-Nip-HV	OD	Chr3_4670817	3	4344719	6107352	0.0315228	0.789888	25.0577	LOC_Os03g10080
CS-PBP-ind-Nip-HV	OD	Chr3_4670817	3	4344719	6107352	0.0315228	0.789888	25.0577	LOC_Os03g08450	1	1
CS-PBP-ind-Nip-HV	OD	Chr3_4670817	3	4344719	6107352	0.0315228	0.789888	25.0577	LOC_Os03g09980
CS-PBP-ind-Nip-HV	OD	Chr3_4670817	3	4344719	6107352	0.0315228	0.789888	25.0577	LOC_Os03g08460
CS-PBP-ind-Nip-HV	OD	Chr3_4670817	3	4344719	6107352	0.0315228	0.789888	25.0577	LOC_Os03g11140	1	1
CS-PBP-ind-Nip-HV	OD	Chr3_4670817	3	4344719	6107352	0.0315228	0.789888	25.0577	LOC_Os03g08490
CS-PBP-ind-Nip-HV	OD	Chr3_4670817	3	4344719	6107352	0.0315228	0.789888	25.0577	LOC_Os03g08850	1	1						P2LP
CS-PBP-ind-Nip-HV	OD	Chr3_4670817	3	4344719	6107352	0.0315228	0.789888	25.0577	LOC_Os03g08590
CS-PBP-ind-Nip-HV	OD	Chr4_19666120	4	19589011	20475167	0.21952	0.922567	4.20265	LOC_Os04g32670	1	1
CS-PBP-ind-Nip-HV	OD	Chr4_19666120	4	19589011	20475167	0.21952	0.922567	4.20265	LOC_Os04g32580	1	1						P2LP
CS-PBP-ind-Nip-HV	OD	Chr4_19666120	4	19589011	20475167	0.21952	0.922567	4.20265	LOC_Os04g32730
CS-PBP-ind-Nip-HV	OD	Chr4_19666120	4	19589011	20475167	0.21952	0.922567	4.20265	LOC_Os04g32540	1	1						P2LP
CS-PBP-ind-Nip-HV	OD	Chr4_19666120	4	19589011	20475167	0.21952	0.922567	4.20265	LOC_Os04g32770	1				P2MP	P2MP	P2MP
CS-PBP-ind-Nip-HV	OD	Chr4_19666120	4	19589011	20475167	0.21952	0.922567	4.20265	LOC_Os04g32790	1	1
CS-PBP-ind-Nip-HV	OD	Chr4_19666120	4	19589011	20475167	0.21952	0.922567	4.20265	LOC_Os04g32810
CS-PBP-ind-Nip-HV	OD	Chr4_19666120	4	19589011	20475167	0.21952	0.922567	4.20265	LOC_Os04g32640
CS-PBP-ind-Nip-HV	OD	Chr4_19666120	4	19589011	20475167	0.21952	0.922567	4.20265	LOC_Os04g32780
CS-PBP-ind-Nip-HV	OD	Chr4_19666120	4	19589011	20475167	0.21952	0.922567	4.20265	LOC_Os04g32660	1						P1MP	P1OHP
CS-PBP-ind-Nip-HV	OD	Chr4_19666120	4	19589011	20475167	0.21952	0.922567	4.20265	LOC_Os04g32800
CS-PBP-ind-Nip-HV	OD	Chr4_19666120	4	19589011	20475167	0.21952	0.922567	4.20265	LOC_Os04g32680
CS-PBP-ind-Nip-HV	OD	Chr4_19666120	4	19589011	20475167	0.21952	0.922567	4.20265	LOC_Os04g32840
CS-PBP-ind-Nip-HV	OD	Chr4_19666120	4	19589011	20475167	0.21952	0.922567	4.20265	LOC_Os04g32690
CS-PBP-ind-Nip-HV	OD	Chr4_19666120	4	19589011	20475167	0.21952	0.922567	4.20265	LOC_Os04g32610					CPOD	NoDiff	NoDiff
CS-PBP-ind-Nip-HV	OD	Chr4_19666120	4	19589011	20475167	0.21952	0.922567	4.20265	LOC_Os04g32740
CS-PBP-ind-Nip-HV	OD	Chr4_19666120	4	19589011	20475167	0.21952	0.922567	4.20265	LOC_Os04g32600
CS-PBP-ind-Nip-HV	OD	Chr4_19666120	4	19589011	20475167	0.21952	0.922567	4.20265	LOC_Os04g32710	1							P1OHP
CS-PBP-ind-Nip-HV	OD	Chr4_19666120	4	19589011	20475167	0.21952	0.922567	4.20265	LOC_Os04g32550	1							P1OHP
CS-PBP-ind-Nip-HV	OD	Chr4_19666120	4	19589011	20475167	0.21952	0.922567	4.20265	LOC_Os04g32650	1	1						P1LP
CS-PBP-ind-Nip-HV	OD	Chr4_19666120	4	19589011	20475167	0.21952	0.922567	4.20265	LOC_Os04g32750
CS-PBP-ind-Nip-HV	OD	Chr5_20394184	5	20383454	20419689	0.144202	2.41166	16.7241	LOC_Os05g34410
CS-PBP-ind-Nip-HV	OD	Chr5_20394184	5	20383454	20419689	0.144202	2.41166	16.7241	LOC_Os05g34390	1				P1MP	P1MP	P1MP
CS-PBP-ind-Nip-HV	OD	Chr5_20394184	5	20383454	20419689	0.144202	2.41166	16.7241	LOC_Os05g34440	1
CS-PBP-ind-Nip-HV	OD	Chr5_20394184	5	20383454	20419689	0.144202	2.41166	16.7241	LOC_Os05g34450	1	1
CS-PBP-ind-Nip-HV	OD	Chr5_20394184	5	20383454	20419689	0.144202	2.41166	16.7241	LOC_Os05g34400
CS-PBP-ind-Nip-HV	OD	Chr6_25195648	6	25180805	25218694	0.242092	0.808463	3.33949	LOC_Os06g42000	1							P1HP
CS-PBP-ind-Nip-HV	OD	Chr6_25195648	6	25180805	25218694	0.242092	0.808463	3.33949	LOC_Os06g41980					P1ND	NoDiff	NoDiff
CS-PBP-ind-Nip-HV	OD	Chr6_25195648	6	25180805	25218694	0.242092	0.808463	3.33949	LOC_Os06g41990
CS-PBP-ind-Nip-HV	OD	Chr6_25195648	6	25180805	25218694	0.242092	0.808463	3.33949	LOC_Os06g41960
CS-PBP-ind-Nip-HV	OD	Chr6_2690321	6	2398749	2702252	0.254682	1.50743	5.91889	LOC_Os06g05330
CS-PBP-ind-Nip-HV	OD	Chr6_2690321	6	2398749	2702252	0.254682	1.50743	5.91889	LOC_Os06g05900	1
CS-PBP-ind-Nip-HV	OD	Chr6_2690321	6	2398749	2702252	0.254682	1.50743	5.91889	LOC_Os06g05890	1
CS-PBP-ind-Nip-HV	OD	Chr6_2690321	6	2398749	2702252	0.254682	1.50743	5.91889	LOC_Os06g05880	1
CS-PBP-ind-Nip-HV	D	Chr8_15220664	8	14014015	15510621	0.392134	0.332199	0.847158	LOC_Os08g24810
CS-PBP-ind-Nip-HV	D	Chr8_15220664	8	14014015	15510621	0.392134	0.332199	0.847158	LOC_Os08g24980
CS-PBP-ind-Nip-HV	D	Chr8_15220664	8	14014015	15510621	0.392134	0.332199	0.847158	LOC_Os08g24830
CS-PBP-ind-Nip-HV	D	Chr8_15220664	8	14014015	15510621	0.392134	0.332199	0.847158	LOC_Os08g24760	1	1						P1LP
CS-PBP-ind-Nip-HV	D	Chr8_15220664	8	14014015	15510621	0.392134	0.332199	0.847158	LOC_Os08g25050	1	1
CS-PBP-ind-Nip-HV	D	Chr8_15220664	8	14014015	15510621	0.392134	0.332199	0.847158	LOC_Os08g25140	1				P2NOD	NoDiff	P1ND
CS-PBP-ind-Nip-HV	D	Chr8_15220664	8	14014015	15510621	0.392134	0.332199	0.847158	LOC_Os08g25490
CS-PBP-ind-Nip-HV	D	Chr8_15220664	8	14014015	15510621	0.392134	0.332199	0.847158	LOC_Os08g25230
CS-PBP-ind-Nip-HV	D	Chr8_15220664	8	14014015	15510621	0.392134	0.332199	0.847158	LOC_Os08g25390	1
CS-PBP-ind-Nip-HV	D	Chr8_15220664	8	14014015	15510621	0.392134	0.332199	0.847158	LOC_Os08g25240
CS-PBP-ind-Nip-HV	D	Chr8_15220664	8	14014015	15510621	0.392134	0.332199	0.847158	LOC_Os08g25250
CS-PBP-ind-Nip-HV	D	Chr8_15220664	8	14014015	15510621	0.392134	0.332199	0.847158	LOC_Os08g25040
CS-PBP-ind-Nip-HV	D	Chr8_15220664	8	14014015	15510621	0.392134	0.332199	0.847158	LOC_Os08g25060	1	1				P1POD	P1MP	P1HP
CS-PBP-ind-Nip-HV	D	Chr8_15220664	8	14014015	15510621	0.392134	0.332199	0.847158	LOC_Os08g25030
CS-PBP-ind-Nip-HV	D	Chr8_15220664	8	14014015	15510621	0.392134	0.332199	0.847158	LOC_Os08g25260	1
CS-PBP-ind-Nip-HV	D	Chr8_15220664	8	14014015	15510621	0.392134	0.332199	0.847158	LOC_Os08g25190					NoDiff	NoDiff	CPOD
CS-PBP-ind-Nip-HV	D	Chr8_15220664	8	14014015	15510621	0.392134	0.332199	0.847158	LOC_Os08g25080	1
CS-PBP-ind-Nip-HV	OD	Chr9_15696919	9	15636784	15883856	0.0315279	0.632022	20.0465	LOC_Os09g26100
CS-PBP-ind-Nip-HV	OD	Chr9_15696919	9	15636784	15883856	0.0315279	0.632022	20.0465	LOC_Os09g26020	1
CS-PBP-ind-Nip-HV	OD	Chr9_15696919	9	15636784	15883856	0.0315279	0.632022	20.0465	LOC_Os09g26080
CS-PBP-ind-Nip-HV	OD	Chr9_15696919	9	15636784	15883856	0.0315279	0.632022	20.0465	LOC_Os09g26240	1
CS-PBP-ind-Nip-HV	OD	Chr9_15696919	9	15636784	15883856	0.0315279	0.632022	20.0465	LOC_Os09g26060
CS-PBP-ind-Nip-HV	OD	Chr9_15696919	9	15636784	15883856	0.0315279	0.632022	20.0465	LOC_Os09g26050
CS-PBP-ind-Nip-HV	OD	Chr9_15696919	9	15636784	15883856	0.0315279	0.632022	20.0465	LOC_Os09g26070
CS-PBP-ind-Nip-HV	OD	Chr9_15696919	9	15636784	15883856	0.0315279	0.632022	20.0465	LOC_Os09g26190	1							P2BLP
CS-PBP-ind-Nip-HV	OD	Chr9_15696919	9	15636784	15883856	0.0315279	0.632022	20.0465	LOC_Os09g26210
CS-PBP-ind-Nip-HV	OD	Chr9_19353947	9	18171372	20000635	0.683753	2.36766	3.46274	LOC_Os09g31980
CS-PBP-ind-Nip-HV	OD	Chr9_19353947	9	18171372	20000635	0.683753	2.36766	3.46274	LOC_Os09g32930	1	1			P2POD
CS-PBP-ind-Nip-HV	OD	Chr9_19353947	9	18171372	20000635	0.683753	2.36766	3.46274	LOC_Os09g32630
CS-PBP-ind-Nip-HV	OD	Chr9_19353947	9	18171372	20000635	0.683753	2.36766	3.46274	LOC_Os09g31350	1	1
CS-PBP-ind-Nip-HV	OD	Chr9_19353947	9	18171372	20000635	0.683753	2.36766	3.46274	LOC_Os09g32410	1	1			NoDiff	P2PD	NoDiff	P2LP
CS-PBP-ind-Nip-HV	OD	Chr9_19353947	9	18171372	20000635	0.683753	2.36766	3.46274	LOC_Os09g32330	1	1			NoDiff	NoDiff	P1NOD	P1BLP
CS-PBP-ind-Nip-HV	OD	Chr9_19353947	9	18171372	20000635	0.683753	2.36766	3.46274	LOC_Os09g30490
CS-PBP-ind-Nip-HV	OD	Chr9_19353947	9	18171372	20000635	0.683753	2.36766	3.46274	LOC_Os09g31360
CS-PBP-ind-Nip-HV	OD	Chr9_19353947	9	18171372	20000635	0.683753	2.36766	3.46274	LOC_Os09g31380	1
CS-PBP-ind-Nip-HV	OD	Chr9_19353947	9	18171372	20000635	0.683753	2.36766	3.46274	LOC_Os09g30170
CS-PBP-ind-Nip-HV	OD	Chr9_19353947	9	18171372	20000635	0.683753	2.36766	3.46274	LOC_Os09g31370	1	1			NoDiff	NoDiff	P1NOD
CS-PBP-ind-Nip-HV	OD	Chr9_19353947	9	18171372	20000635	0.683753	2.36766	3.46274	LOC_Os09g30260
CS-PBP-ind-Nip-HV	OD	Chr9_19353947	9	18171372	20000635	0.683753	2.36766	3.46274	LOC_Os09g32910	1	1
CS-PBP-ind-Nip-HV	OD	Chr9_19353947	9	18171372	20000635	0.683753	2.36766	3.46274	LOC_Os09g31090
CS-PBP-ind-Nip-HV	OD	Chr9_19353947	9	18171372	20000635	0.683753	2.36766	3.46274	LOC_Os09g32290
CS-PBP-ind-Nip-HV	OD	Chr9_19353947	9	18171372	20000635	0.683753	2.36766	3.46274	LOC_Os09g32470	1
CS-PBP-ind-Nip-HV	OD	Chr9_19353947	9	18171372	20000635	0.683753	2.36766	3.46274	LOC_Os09g33620	1	1						P2LP
CS-PBP-ind-Nip-HV	OD	Chr9_19353947	9	18171372	20000635	0.683753	2.36766	3.46274	LOC_Os09g30502
CS-PBP-ind-Nip-HV	OD	Chr9_19353947	9	18171372	20000635	0.683753	2.36766	3.46274	LOC_Os09g32430	1
CS-PBP-ind-Nip-HV	OD	Chr9_19353947	9	18171372	20000635	0.683753	2.36766	3.46274	LOC_Os09g30330	1	1
CS-PBP-ind-Nip-HV	OD	Chr9_19353947	9	18171372	20000635	0.683753	2.36766	3.46274	LOC_Os09g31170					P1ND	CNOD	NoDiff
CS-PBP-ind-Nip-HV	OD	Chr9_19353947	9	18171372	20000635	0.683753	2.36766	3.46274	LOC_Os09g32650	1	1
CS-PBP-ind-Nip-HV	OD	Chr9_19353947	9	18171372	20000635	0.683753	2.36766	3.46274	LOC_Os09g31080	1				NoDiff	NoDiff	P1ND	P1OHP
CS-PBP-ind-Nip-HV	OD	Chr9_19353947	9	18171372	20000635	0.683753	2.36766	3.46274	LOC_Os09g33490					NoDiff	NoDiff	CNOD
CS-PBP-ind-Nip-HV	OD	Chr9_19353947	9	18171372	20000635	0.683753	2.36766	3.46274	LOC_Os09g33470	1				P1PD	NoDiff
CS-PBP-ind-Nip-HV	OD	Chr9_19353947	9	18171372	20000635	0.683753	2.36766	3.46274	LOC_Os09g32030
CS-PBP-ind-Nip-HV	OD	Chr9_19353947	9	18171372	20000635	0.683753	2.36766	3.46274	LOC_Os09g31160
CS-PBP-ind-Nip-HV	OD	Chr9_19353947	9	18171372	20000635	0.683753	2.36766	3.46274	LOC_Os09g31330
CS-PBP-ind-Nip-HV	OD	Chr9_19353947	9	18171372	20000635	0.683753	2.36766	3.46274	LOC_Os09g32830
CS-PBP-ind-Nip-HV	OD	Chr9_19353947	9	18171372	20000635	0.683753	2.36766	3.46274	LOC_Os09g32240	1							P2LP
CS-PBP-ind-Nip-HV	OD	Chr9_19353947	9	18171372	20000635	0.683753	2.36766	3.46274	LOC_Os09g32550	1	1						P1HP
CS-PBP-ind-Nip-HV	OD	Chr9_19353947	9	18171372	20000635	0.683753	2.36766	3.46274	LOC_Os09g32090	1
CS-PBP-ind-Nip-HV	OD	Chr9_19353947	9	18171372	20000635	0.683753	2.36766	3.46274	LOC_Os09g31040	1
CS-PBP-ind-Nip-HV	OD	Chr9_19353947	9	18171372	20000635	0.683753	2.36766	3.46274	LOC_Os09g32988	1	1
CS-PBP-ind-Nip-HV	OD	Chr9_19353947	9	18171372	20000635	0.683753	2.36766	3.46274	LOC_Os09g32300	1	1
CS-PBP-ind-Nip-HV	OD	Chr9_19353947	9	18171372	20000635	0.683753	2.36766	3.46274	LOC_Os09g32000
CS-PBP-ind-Nip-HV	OD	Chr9_19353947	9	18171372	20000635	0.683753	2.36766	3.46274	LOC_Os09g32740	1	1
CS-PBP-ind-Nip-HV	OD	Chr9_19353947	9	18171372	20000635	0.683753	2.36766	3.46274	LOC_Os09g31420
CS-PBP-ind-Nip-HV	OD	Chr9_19353947	9	18171372	20000635	0.683753	2.36766	3.46274	LOC_Os09g32020	1	1
CS-PBP-ind-Nip-HV	OD	Chr9_19353947	9	18171372	20000635	0.683753	2.36766	3.46274	LOC_Os09g31490	1					NoDiff	P1MP
CS-PBP-ind-Nip-HV	OD	Chr9_19353947	9	18171372	20000635	0.683753	2.36766	3.46274	LOC_Os09g31120
CS-PBP-ind-Nip-HV	OD	Chr9_19353947	9	18171372	20000635	0.683753	2.36766	3.46274	LOC_Os09g32620
CS-PBP-ind-Nip-HV	OD	Chr9_19353947	9	18171372	20000635	0.683753	2.36766	3.46274	LOC_Os09g32690
CS-PBP-ind-Nip-HV	OD	Chr9_19353947	9	18171372	20000635	0.683753	2.36766	3.46274	LOC_Os09g32670	1							P1HP
CS-PBP-ind-Nip-HV	OD	Chr9_19353947	9	18171372	20000635	0.683753	2.36766	3.46274	LOC_Os09g31031	1	1
CS-PBP-ind-Nip-HV	OD	Chr9_19353947	9	18171372	20000635	0.683753	2.36766	3.46274	LOC_Os09g32570
CS-PBP-ind-Nip-HV	OD	Chr9_19353947	9	18171372	20000635	0.683753	2.36766	3.46274	LOC_Os09g32700	1	1
CS-PBP-ind-Nip-HV	OD	Chr9_19353947	9	18171372	20000635	0.683753	2.36766	3.46274	LOC_Os09g32680	1
CS-PBP-ind-Nip-HV	OD	Chr9_19353947	9	18171372	20000635	0.683753	2.36766	3.46274	LOC_Os09g32490					NoDiff	P2PD	P2POD
CS-PBP-ind-Nip-HV	OD	Chr9_19353947	9	18171372	20000635	0.683753	2.36766	3.46274	LOC_Os09g33480	1	1
CS-PBP-ind-Nip-HV	OD	Chr9_19353947	9	18171372	20000635	0.683753	2.36766	3.46274	LOC_Os09g31220	1	1
CS-PBP-ind-Nip-HV	OD	Chr9_19353947	9	18171372	20000635	0.683753	2.36766	3.46274	LOC_Os09g33870	1	1
CS-PBP-ind-Nip-HV	OD	Chr9_19353947	9	18171372	20000635	0.683753	2.36766	3.46274	LOC_Os09g32940	1	1
CS-PBP-ind-Nip-HV	OD	Chr9_19353947	9	18171372	20000635	0.683753	2.36766	3.46274	LOC_Os09g29890	1
CS-PBP-ind-Nip-HV	OD	Chr9_19353947	9	18171372	20000635	0.683753	2.36766	3.46274	LOC_Os09g32010	1
CS-PBP-ind-Nip-HV	OD	Chr9_19353947	9	18171372	20000635	0.683753	2.36766	3.46274	LOC_Os09g32560	1							P2LP
CS-PBP-ind-Nip-HV	OD	Chr9_19353947	9	18171372	20000635	0.683753	2.36766	3.46274	LOC_Os09g32040
CS-PBP-ind-Nip-HV	OD	Chr9_19353947	9	18171372	20000635	0.683753	2.36766	3.46274	LOC_Os09g31400
CS-PBP-ind-Nip-HV	OD	Chr9_19353947	9	18171372	20000635	0.683753	2.36766	3.46274	LOC_Os09g32450	1	1						P1LP
CS-PBP-ind-Nip-HV	OD	Chr9_19353947	9	18171372	20000635	0.683753	2.36766	3.46274	LOC_Os09g32600	1	1
CS-PBP-ind-Nip-HV	OD	Chr9_19353947	9	18171372	20000635	0.683753	2.36766	3.46274	LOC_Os09g31250
CS-PBP-ind-Nip-HV	OD	Chr9_19353947	9	18171372	20000635	0.683753	2.36766	3.46274	LOC_Os09g31240
CS-PBP-ind-Nip-HV	OD	Chr9_19353947	9	18171372	20000635	0.683753	2.36766	3.46274	LOC_Os09g32310
CS-PBP-ind-Nip-HV	OD	Chr9_19353947	9	18171372	20000635	0.683753	2.36766	3.46274	LOC_Os09g32440	1	1
CS-PBP-ind-Nip-HV	OD	Chr9_19353947	9	18171372	20000635	0.683753	2.36766	3.46274	LOC_Os09g32050	1					P2NOD	NoDiff
CS-PBP-ind-Nip-HV	OD	Chr9_19353947	9	18171372	20000635	0.683753	2.36766	3.46274	LOC_Os09g32992	1							P1LP
CS-PBP-ind-Nip-HV	OD	Chr9_19353947	9	18171372	20000635	0.683753	2.36766	3.46274	LOC_Os09g32800	1	1
CS-PBP-ind-Nip-HV	OD	Chr9_19353947	9	18171372	20000635	0.683753	2.36766	3.46274	LOC_Os09g32890					NoDiff	P2ND	NoDiff
CS-PBP-ind-Nip-HV	OD	Chr9_19353947	9	18171372	20000635	0.683753	2.36766	3.46274	LOC_Os09g33810	1
CS-PBP-ind-Nip-HV	OD	Chr9_19353947	9	18171372	20000635	0.683753	2.36766	3.46274	LOC_Os09g32980
CS-PBP-ind-Nip-HV	OD	Chr9_19353947	9	18171372	20000635	0.683753	2.36766	3.46274	LOC_Os09g32610	1
CS-PBP-ind-Nip-HV	OD	Chr9_19353947	9	18171372	20000635	0.683753	2.36766	3.46274	LOC_Os09g32660
CS-PBP-ind-Nip-HV	OD	Chr9_19353947	9	18171372	20000635	0.683753	2.36766	3.46274	LOC_Os09g32230
CS-PBP-ind-Nip-HV	OD	Chr9_19353947	9	18171372	20000635	0.683753	2.36766	3.46274	LOC_Os09g32790
CS-PBP-ind-Nip-HV	OD	Chr9_19353947	9	18171372	20000635	0.683753	2.36766	3.46274	LOC_Os09g33460	1	1						P2LP
CS-PBP-ind-Nip-HV	OD	Chr9_19353947	9	18171372	20000635	0.683753	2.36766	3.46274	LOC_Os09g32948	1							P2BLP
CS-PBP-ind-Nip-HV	OD	Chr9_19353947	9	18171372	20000635	0.683753	2.36766	3.46274	LOC_Os09g32210	1	1			NoDiff	NoDiff	P2PD	P1LP
CS-PBP-ind-Nip-HV	OD	Chr9_19353947	9	18171372	20000635	0.683753	2.36766	3.46274	LOC_Os09g32870					CPOD	NoDiff	NoDiff
CS-PBP-ind-Nip-HV	OD	Chr9_19353947	9	18171372	20000635	0.683753	2.36766	3.46274	LOC_Os09g33780	1	1
CS-PBP-ind-Nip-HV	OD	Chr9_19353947	9	18171372	20000635	0.683753	2.36766	3.46274	LOC_Os09g32920
CS-PBP-ind-Nip-HV	OD	Chr9_19353947	9	18171372	20000635	0.683753	2.36766	3.46274	LOC_Os09g33450	1	1
CS-PBP-ind-Nip-HV	OD	Chr9_19353947	9	18171372	20000635	0.683753	2.36766	3.46274	LOC_Os09g33876
CS-PBP-ind-Nip-HV	OD	Chr9_19353947	9	18171372	20000635	0.683753	2.36766	3.46274	LOC_Os09g30400					P1PD		NoDiff
CS-PBP-ind-Nip-HV	OD	Chr9_19353947	9	18171372	20000635	0.683753	2.36766	3.46274	LOC_Os09g32640	1							P1HP
CS-PBP-ind-Nip-HV	D	Chr9_6965725	9	6867397	7015795	0.941104	-1.37119	-1.457	LOC_Os09g12290	1	1
CS-PBP-ind-Nip-HV	D	Chr9_6965725	9	6867397	7015795	0.941104	-1.37119	-1.457	LOC_Os09g12240	1	1			P2MP	NoDiff
CS-PBP-ind-Nip-HV	D	Chr9_6965725	9	6867397	7015795	0.941104	-1.37119	-1.457	LOC_Os09g12250
CS-PBP-ind-Nip-HV	D	Chr9_6965725	9	6867397	7015795	0.941104	-1.37119	-1.457	LOC_Os09g12230
CS-PBP-jap-9311-F1	OD	Chr1_22587342	1	22526234	22757563	0.156867	0.403435	4.04829	LOC_Os01g40320
CS-PBP-jap-9311-F1	OD	Chr1_22587342	1	22526234	22757563	0.156867	0.403435	4.04829	LOC_Os01g40170
CS-PBP-jap-9311-F1	OD	Chr1_22587342	1	22526234	22757563	0.156867	0.403435	4.04829	LOC_Os01g39940
CS-PBP-jap-9311-F1	OD	Chr1_8892547	1	8891183	8908827	0.386183	-1.16691	-7.05373	LOC_Os01g15780	1	1			NoDiff	P1POD	P1PD
CS-PBP-jap-9311-F1	OD	Chr1_8892547	1	8891183	8908827	0.386183	-1.16691	-7.05373	LOC_Os01g15790	1
CS-PBP-jap-9311-F1	D	Chr10_4262354	10	4262354	4272472	0.986574	1.39785	1.42567	LOC_Os10g07978	1
CS-PBP-jap-9311-F1	D	Chr10_4262354	10	4262354	4272472	0.986574	1.39785	1.42567	LOC_Os10g07974
CS-PBP-jap-9311-F1	D	Chr11_22265461	11	22265076	22265461	1.22404	0.737774	0.603687	LOC_Os11g37680
CS-PBP-jap-9311-F1	OD	Chr11_5652758	11	5175845	5655185	0.285566	-1.46282	-6.30274	LOC_Os11g10420	1	1						P1BLP
CS-PBP-jap-9311-F1	OD	Chr11_5652758	11	5175845	5655185	0.285566	-1.46282	-6.30274	LOC_Os11g10410
CS-PBP-jap-9311-F1	OD	Chr11_5652758	11	5175845	5655185	0.285566	-1.46282	-6.30274	LOC_Os11g10170
CS-PBP-jap-9311-F1	OD	Chr11_5652758	11	5175845	5655185	0.285566	-1.46282	-6.30274	LOC_Os11g10400	1	1						P1HP
CS-PBP-jap-9311-F1	OD	Chr11_5652758	11	5175845	5655185	0.285566	-1.46282	-6.30274	LOC_Os11g10200	1							P1LP
CS-PBP-jap-9311-F1	OD	Chr11_5652758	11	5175845	5655185	0.285566	-1.46282	-6.30274	LOC_Os11g09690
CS-PBP-jap-9311-F1	A	Chr11_6364151	11	6217063	6410049	0.986763	-0.378632	-0.393296	LOC_Os11g11240	1				P1MP	P1MP	P1MP
CS-PBP-jap-9311-F1	A	Chr11_6364151	11	6217063	6410049	0.986763	-0.378632	-0.393296	LOC_Os11g11530
CS-PBP-jap-9311-F1	A	Chr11_6364151	11	6217063	6410049	0.986763	-0.378632	-0.393296	LOC_Os11g11230
CS-PBP-jap-9311-F1	A	Chr11_6364151	11	6217063	6410049	0.986763	-0.378632	-0.393296	LOC_Os11g11480
CS-PBP-jap-9311-F1	A	Chr11_6364151	11	6217063	6410049	0.986763	-0.378632	-0.393296	LOC_Os11g11520
CS-PBP-jap-9311-F1	A	Chr4_17901266	4	17726774	17901266	0.413524	-0.190714	1.72574	LOC_Os04g29890	1
CS-PBP-jap-9311-F1	A	Chr4_17901266	4	17726774	17901266	0.413524	-0.190714	1.72574	LOC_Os04g29880
CS-PBP-jap-9311-F1	A	Chr4_17901266	4	17726774	17901266	0.413524	-0.190714	1.72574	LOC_Os04g29740
CS-PBP-jap-9311-F1	A	Chr4_17901266	4	17726774	17901266	0.413524	-0.190714	1.72574	LOC_Os04g29920	1					P2ND
CS-PBP-jap-9311-F1	OD	Chr4_31456567	4	31456567	31457863	0.460628	-1.17918	-3.04769	LOC_Os04g52830	1
CS-PBP-jap-9311-F1	OD	Chr5_25146717	5	25133095	25146721	0.206476	2.10219	11.0487	LOC_Os05g43220
CS-PBP-jap-9311-F1	OD	Chr6_17335387	6	17335387	17335391	0.478729	1.04901	2.20692	LOC_Os06g30080
CS-PBP-jap-9311-F1	D	Chr7_24506609	7	24411505	24506609	0.829221	-0.421731	2.43417	LOC_Os07g40770	1	1
CS-PBP-jap-9311-F1	D	Chr7_24506609	7	24411505	24506609	0.829221	-0.421731	2.43417	LOC_Os07g40940	1	1			P2MP
CS-PBP-jap-9311-F1	D	Chr7_24506609	7	24411505	24506609	0.829221	-0.421731	2.43417	LOC_Os07g40890
CS-PBP-jap-9311-F1	D	Chr7_24506609	7	24411505	24506609	0.829221	-0.421731	2.43417	LOC_Os07g40920	1	1
CS-PBP-jap-9311-F1	D	Chr7_24506609	7	24411505	24506609	0.829221	-0.421731	2.43417	LOC_Os07g40760	1
CS-PBP-jap-9311-F1	D	Chr7_24506609	7	24411505	24506609	0.829221	-0.421731	2.43417	LOC_Os07g40730	1	1
CS-PBP-jap-9311-F1	D	Chr7_24506609	7	24411505	24506609	0.829221	-0.421731	2.43417	LOC_Os07g40790
CS-PBP-jap-9311-F1	A	Chr7_67847	7	13729	125204	1.07909	-0.378991	-0.356479	LOC_Os07g01150	1	1						P2OHP
CS-PBP-jap-9311-F1	A	Chr7_67847	7	13729	125204	1.07909	-0.378991	-0.356479	LOC_Os07g01110
CS-PBP-jap-9311-F1	A	Chr7_67847	7	13729	125204	1.07909	-0.378991	-0.356479	LOC_Os07g01030
CS-PBP-jap-9311-F1	A	Chr7_67847	7	13729	125204	1.07909	-0.378991	-0.356479	LOC_Os07g01100	1	1
CS-PBP-jap-9311-F1	A	Chr7_67847	7	13729	125204	1.07909	-0.378991	-0.356479	LOC_Os07g01020	1				NoDiff	NoDiff	P1ND	P2LP
CS-PBP-jap-9311-F1	A	Chr7_67847	7	13729	125204	1.07909	-0.378991	-0.356479	LOC_Os07g01120
CS-PBP-jap-9311-F1	A	Chr7_67847	7	13729	125204	1.07909	-0.378991	-0.356479	LOC_Os07g01140	1	1
CS-PBP-jap-9311-F1	A	Chr7_67847	7	13729	125204	1.07909	-0.378991	-0.356479	LOC_Os07g01214
CS-PBP-jap-9311-F1	A	Chr7_67847	7	13729	125204	1.07909	-0.378991	-0.356479	LOC_Os07g01090
CS-PBP-jap-9311-F1	A	Chr7_67847	7	13729	125204	1.07909	-0.378991	-0.356479	LOC_Os07g01130	1	1						P2BLP
CS-PBP-jap-9311-F1	A	Chr7_67847	7	13729	125204	1.07909	-0.378991	-0.356479	LOC_Os07g01114	1				NoDiff	P2PD
CS-PBP-jap-9311-F1	OD	Chr8_14024359	8	13628823	14733454	0.455387	-0.945755	-2.15866	LOC_Os08g24360	1							P1LP
CS-PBP-jap-9311-F1	OD	Chr8_14024359	8	13628823	14733454	0.455387	-0.945755	-2.15866	LOC_Os08g22650
CS-PBP-jap-9311-F1	OD	Chr8_14024359	8	13628823	14733454	0.455387	-0.945755	-2.15866	LOC_Os08g24390	1				NoDiff	NoDiff	P2POD
CS-PBP-jap-9311-F1	OD	Chr8_14024359	8	13628823	14733454	0.455387	-0.945755	-2.15866	LOC_Os08g23700	1	1						P1BLP
CS-PBP-jap-9311-F1	OD	Chr8_16451513	8	16438300	16451513	0.362878	1.09859	3.03736	LOC_Os08g26950
CS-PBP-jap-9311-F1	OD	Chr8_24850544	8	24579532	24860433	0.479578	-1.71151	-5.56731	LOC_Os08g39340
CS-PBP-jap-9311-F1	OD	Chr8_24850544	8	24579532	24860433	0.479578	-1.71151	-5.56731	LOC_Os08g39290	1	1
CS-PBP-jap-9311-F1	OD	Chr8_24850544	8	24579532	24860433	0.479578	-1.71151	-5.56731	LOC_Os08g39310	1	1
CS-PBP-jap-9311-F1	OD	Chr8_24850544	8	24579532	24860433	0.479578	-1.71151	-5.56731	LOC_Os08g38960
CS-PBP-jap-9311-F1	OD	Chr8_24850544	8	24579532	24860433	0.479578	-1.71151	-5.56731	LOC_Os08g39170
CS-PBP-jap-9311-F1	OD	Chr8_24850544	8	24579532	24860433	0.479578	-1.71151	-5.56731	LOC_Os08g39280
CS-PBP-jap-9311-HV	A	Chr10_15898983	10	15783628	16318973	0.743918	-0.294019	-0.402753	LOC_Os10g30560	1				P2MP
CS-PBP-jap-9311-HV	A	Chr10_15898983	10	15783628	16318973	0.743918	-0.294019	-0.402753	LOC_Os10g30590	1	1
CS-PBP-jap-9311-HV	A	Chr10_15898983	10	15783628	16318973	0.743918	-0.294019	-0.402753	LOC_Os10g30600
CS-PBP-jap-9311-HV	A	Chr10_15898983	10	15783628	16318973	0.743918	-0.294019	-0.402753	LOC_Os10g30550	1	1						P1HP
CS-PBP-jap-9311-HV	A	Chr10_15898983	10	15783628	16318973	0.743918	-0.294019	-0.402753	LOC_Os10g30390
CS-PBP-jap-9311-HV	A	Chr10_15898983	10	15783628	16318973	0.743918	-0.294019	-0.402753	LOC_Os10g30951	1	1						P1LP
CS-PBP-jap-9311-HV	A	Chr10_15898983	10	15783628	16318973	0.743918	-0.294019	-0.402753	LOC_Os10g31050
CS-PBP-jap-9311-HV	A	Chr10_15898983	10	15783628	16318973	0.743918	-0.294019	-0.402753	LOC_Os10g30380
CS-PBP-jap-9311-HV	A	Chr10_15898983	10	15783628	16318973	0.743918	-0.294019	-0.402753	LOC_Os10g30370	1	1						P1BLP
CS-PBP-jap-9311-HV	A	Chr10_15898983	10	15783628	16318973	0.743918	-0.294019	-0.402753	LOC_Os10g30880	1
CS-PBP-jap-9311-HV	A	Chr10_15898983	10	15783628	16318973	0.743918	-0.294019	-0.402753	LOC_Os10g30790
CS-PBP-jap-9311-HV	A	Chr10_15898983	10	15783628	16318973	0.743918	-0.294019	-0.402753	LOC_Os10g30960
CS-PBP-jap-9311-HV	D	Chr10_16682379	10	16682154	16689322	0.644839	0.698851	1.03775	LOC_Os10g31820	1	1			P1PD	NoDiff	NoDiff	P1LP
CS-PBP-jap-9311-HV	OD	Chr10_19776263	10	19776263	19976263	0.864464	1.50692	1.74472	LOC_Os10g36900
CS-PBP-jap-9311-HV	OD	Chr2_34723636	2	34718794	34818906	0.747747	-1.45769	-2.01459	LOC_Os02g56750
CS-PBP-jap-9311-HV	OD	Chr2_34723636	2	34718794	34818906	0.747747	-1.45769	-2.01459	LOC_Os02g56690
CS-PBP-jap-9311-HV	OD	Chr2_34723636	2	34718794	34818906	0.747747	-1.45769	-2.01459	LOC_Os02g56710
CS-PBP-jap-9311-HV	OD	Chr2_34723636	2	34718794	34818906	0.747747	-1.45769	-2.01459	LOC_Os02g56810
CS-PBP-jap-9311-HV	OD	Chr2_34723636	2	34718794	34818906	0.747747	-1.45769	-2.01459	LOC_Os02g56720
CS-PBP-jap-9311-HV	OD	Chr2_34723636	2	34718794	34818906	0.747747	-1.45769	-2.01459	LOC_Os02g56760					NoDiff	P2ND	NoDiff
CS-PBP-jap-9311-HV	OD	Chr2_34723636	2	34718794	34818906	0.747747	-1.45769	-2.01459	LOC_Os02g56630
CS-PBP-jap-9311-HV	OD	Chr2_34723636	2	34718794	34818906	0.747747	-1.45769	-2.01459	LOC_Os02g56670
CS-PBP-jap-9311-HV	OD	Chr2_34723636	2	34718794	34818906	0.747747	-1.45769	-2.01459	LOC_Os02g56700
CS-PBP-jap-9311-HV	A	Chr3_25750196	3	25750196	29750196	0.490375	0.211898	0.14401	LOC_Os03g49030
CS-PBP-jap-9311-HV	A	Chr3_25750196	3	25750196	29750196	0.490375	0.211898	0.14401	LOC_Os03g45619
CS-PBP-jap-9311-HV	D	Chr3_5870932	3	5870932	5877593	1.04595	0.548956	0.552698	LOC_Os03g11420	1
CS-PBP-jap-9311-HV	D	Chr3_5870932	3	5870932	5877593	1.04595	0.548956	0.552698	LOC_Os03g11410
CS-PBP-jap-9311-HV	D	Chr6_3338706	6	3313578	3355322	0.880672	0.973198	1.10796	LOC_Os06g07000
CS-PBP-jap-9311-HV	D	Chr6_3338706	6	3313578	3355322	0.880672	0.973198	1.10796	LOC_Os06g07040
CS-PBP-jap-9311-HV	D	Chr6_3338706	6	3313578	3355322	0.880672	0.973198	1.10796	LOC_Os06g06980	1
CS-PBP-jap-9311-HV	D	Chr6_3338706	6	3313578	3355322	0.880672	0.973198	1.10796	LOC_Os06g07060
CS-PBP-jap-9311-HV	D	Chr6_3469874	6	3404332	3598603	0.849251	0.919371	1.08297	LOC_Os06g07474	1
CS-PBP-jap-9311-HV	D	Chr6_3469874	6	3404332	3598603	0.849251	0.919371	1.08297	LOC_Os06g07420
CS-PBP-jap-9311-HV	D	Chr6_3469874	6	3404332	3598603	0.849251	0.919371	1.08297	LOC_Os06g07180
CS-PBP-jap-9311-HV	D	Chr6_3469874	6	3404332	3598603	0.849251	0.919371	1.08297	LOC_Os06g07490	1	1
CS-PBP-jap-9311-HV	D	Chr6_3469874	6	3404332	3598603	0.849251	0.919371	1.08297	LOC_Os06g07170
CS-PBP-jap-9311-HV	D	Chr6_3469874	6	3404332	3598603	0.849251	0.919371	1.08297	LOC_Os06g07150					P1PD	NoDiff	NoDiff
CS-PBP-jap-9311-HV	D	Chr6_3469874	6	3404332	3598603	0.849251	0.919371	1.08297	LOC_Os06g07240	1
CS-PBP-jap-9311-HV	D	Chr6_3469874	6	3404332	3598603	0.849251	0.919371	1.08297	LOC_Os06g07190	1	1
CS-PBP-jap-9311-HV	D	Chr6_3469874	6	3404332	3598603	0.849251	0.919371	1.08297	LOC_Os06g07250
CS-PBP-jap-9311-HV	D	Chr6_3469874	6	3404332	3598603	0.849251	0.919371	1.08297	LOC_Os06g07140	1	1
CS-PBP-jap-9311-HV	D	Chr6_3469874	6	3404332	3598603	0.849251	0.919371	1.08297	LOC_Os06g07220	1	1						P1OHP
CS-PBP-jap-9311-HV	D	Chr6_3469874	6	3404332	3598603	0.849251	0.919371	1.08297	LOC_Os06g07300
CS-PBP-jap-9311-HV	D	Chr6_3469874	6	3404332	3598603	0.849251	0.919371	1.08297	LOC_Os06g07210	1	1						P1BLP
CS-PBP-jap-9311-HV	D	Chr6_3469874	6	3404332	3598603	0.849251	0.919371	1.08297	LOC_Os06g07480	1
CS-PBP-jap-9311-HV	D	Chr6_3469874	6	3404332	3598603	0.849251	0.919371	1.08297	LOC_Os06g07390
CS-PBP-jap-9311-HV	D	Chr6_3469874	6	3404332	3598603	0.849251	0.919371	1.08297	LOC_Os06g07120
CS-PBP-jap-9311-HV	D	Chr6_3469874	6	3404332	3598603	0.849251	0.919371	1.08297	LOC_Os06g07270
CS-PBP-jap-9311-HV	D	Chr6_3469874	6	3404332	3598603	0.849251	0.919371	1.08297	LOC_Os06g07380
CS-PBP-jap-9311-HV	D	Chr6_3469874	6	3404332	3598603	0.849251	0.919371	1.08297	LOC_Os06g07230					NoDiff	P2POD	NoDiff
CS-PBP-jap-9311-HV	D	Chr6_3469874	6	3404332	3598603	0.849251	0.919371	1.08297	LOC_Os06g07130	1
CS-PBP-jap-9311-HV	D	Chr6_3469874	6	3404332	3598603	0.849251	0.919371	1.08297	LOC_Os06g07320
CS-PBP-jap-9311-HV	OD	Chr7_16057795	7	15923037	16112788	0.247281	-1.26982	-5.50757	LOC_Os07g27460
CS-PBP-jap-9311-HV	OD	Chr7_16057795	7	15923037	16112788	0.247281	-1.26982	-5.50757	LOC_Os07g27370
CS-PBP-jap-9311-HV	OD	Chr7_16057795	7	15923037	16112788	0.247281	-1.26982	-5.50757	LOC_Os07g27510
CS-PBP-jap-9311-HV	OD	Chr7_16057795	7	15923037	16112788	0.247281	-1.26982	-5.50757	LOC_Os07g27480	1	1						P2LP
CS-PBP-jap-9311-HV	OD	Chr7_16057795	7	15923037	16112788	0.247281	-1.26982	-5.50757	LOC_Os07g27359					P2PD	NoDiff	NoDiff
CS-PBP-jap-9311-HV	OD	Chr7_16057795	7	15923037	16112788	0.247281	-1.26982	-5.50757	LOC_Os07g27590
CS-PBP-jap-9311-HV	OD	Chr7_16057795	7	15923037	16112788	0.247281	-1.26982	-5.50757	LOC_Os07g27490	1
CS-PBP-jap-9311-HV	D	Chr7_25322899	7	25320778	25322899	1.2106	1.27698	1.05481	LOC_Os07g42310
CS-PBP-jap-9311-HV	A	Chr7_26296517	7	26296517	26310657	0.530052	-0.0178211	-0.184808	LOC_Os07g43980	1	1
CS-PBP-jap-9311-HV	A	Chr7_26296517	7	26296517	26310657	0.530052	-0.0178211	-0.184808	LOC_Os07g44020	1	1
CS-PBP-jap-9311-HV	OD	Chr7_4733829	7	4733768	4733837	0.861653	-1.78007	-2.10551	LOC_Os07g09060	1				NoDiff	P2ND	NoDiff	P1LP
CS-PBP-jap-9311-HV	OD	Chr8_24860454	8	24860433	24860454	0.291425	-1.08807	-4.09573	LOC_Os08g39340
CS-PBP-jap-9311-HV	OD	Chr8_3111203	8	3109989	3111704	0.583503	1.37407	2.35601	LOC_Os08g05800
CS-PBP-jap-9311-HV	D	Chr8_5251028	8	5251028	5442998	1.12662	0.64589	0.574408	LOC_Os08g09040
CS-PBP-jap-9311-HV	D	Chr8_5251028	8	5251028	5442998	1.12662	0.64589	0.574408	LOC_Os08g09130
CS-PBP-jap-9311-HV	D	Chr8_5251028	8	5251028	5442998	1.12662	0.64589	0.574408	LOC_Os08g09050
CS-PBP-jap-9311-HV	D	Chr8_5251028	8	5251028	5442998	1.12662	0.64589	0.574408	LOC_Os08g09280
CS-PBP-jap-9311-HV	D	Chr8_5251028	8	5251028	5442998	1.12662	0.64589	0.574408	LOC_Os08g09260	1	1			P1ND		CNOD
CS-PBP-jap-9311-HV	D	Chr8_5251028	8	5251028	5442998	1.12662	0.64589	0.574408	LOC_Os08g09380	1				P2MP	NoDiff
CS-PBP-jap-9311-HV	D	Chr8_5251028	8	5251028	5442998	1.12662	0.64589	0.574408	LOC_Os08g09290
CS-PBP-jap-9311-HV	OD	Chr9_11266074	9	10373908	11268970	0.178856	-1.47826	-96.3684	LOC_Os09g16970
CS-PBP-jap-9311-HV	OD	Chr9_11266074	9	10373908	11268970	0.178856	-1.47826	-96.3684	LOC_Os09g18330
CS-PBP-jap-9311-HV	OD	Chr9_11266074	9	10373908	11268970	0.178856	-1.47826	-96.3684	LOC_Os09g18320	1
CS-PBP-jap-9311-HV	OD	Chr9_11266074	9	10373908	11268970	0.178856	-1.47826	-96.3684	LOC_Os09g18360
CS-PBP-jap-9311-HV	OD	Chr9_11436264	9	11436260	11609835	0.188994	-1.09543	-5.77366	LOC_Os09g19280	1
CS-PBP-jap-9311-HV	OD	Chr9_11436264	9	11436260	11609835	0.188994	-1.09543	-5.77366	LOC_Os09g19140	1	1
CS-PBP-jap-9311-HV	OD	Chr9_11436264	9	11436260	11609835	0.188994	-1.09543	-5.77366	LOC_Os09g19380
CS-PBP-jap-9311-HV	OD	Chr9_11436264	9	11436260	11609835	0.188994	-1.09543	-5.77366	LOC_Os09g19390
CS-PBP-jap-9311-HV	OD	Chr9_11436264	9	11436260	11609835	0.188994	-1.09543	-5.77366	LOC_Os09g19274	1						P1MP	P1BLP
CS-PBP-jap-9311-HV	OD	Chr9_16661626	9	16661626	16717308	0.671666	-2.32132	-3.45685	LOC_Os09g27490
CS-PBP-jap-9311-HV	OD	Chr9_16661626	9	16661626	16717308	0.671666	-2.32132	-3.45685	LOC_Os09g27440
CS-PBP-jap-9311-HV	OD	Chr9_16661626	9	16661626	16717308	0.671666	-2.32132	-3.45685	LOC_Os09g27500
CS-PBP-jap-Nip-F1	OD	Chr1_24511404	1	24506807	24538434	0.152149	-1.86345	-14.4088	LOC_Os01g43020	1	1						P1BLP
CS-PBP-jap-Nip-F1	OD	Chr1_24511404	1	24506807	24538434	0.152149	-1.86345	-14.4088	LOC_Os01g43030	1	1
CS-PBP-jap-Nip-F1	D	Chr1_25376918	1	25376918	25483547	0.870889	-0.893017	-1.02694	LOC_Os01g44260
CS-PBP-jap-Nip-F1	D	Chr1_25376918	1	25376918	25483547	0.870889	-0.893017	-1.02694	LOC_Os01g44430
CS-PBP-jap-Nip-F1	D	Chr1_25376918	1	25376918	25483547	0.870889	-0.893017	-1.02694	LOC_Os01g44394	1	1						P1LP
CS-PBP-jap-Nip-F1	OD	Chr1_325906	1	222779	407799	0.587398	2.54191	5.30766	LOC_Os01g01689	1	1
CS-PBP-jap-Nip-F1	OD	Chr1_325906	1	222779	407799	0.587398	2.54191	5.30766	LOC_Os01g01760
CS-PBP-jap-Nip-F1	OD	Chr1_325906	1	222779	407799	0.587398	2.54191	5.30766	LOC_Os01g01650	1
CS-PBP-jap-Nip-F1	OD	Chr1_325906	1	222779	407799	0.587398	2.54191	5.30766	LOC_Os01g01770							CPOD
CS-PBP-jap-Nip-F1	D	Chr1_42692368	1	42078395	42710210	1.53563	1.81682	1.19049	LOC_Os01g73680	1	1			P2MP
CS-PBP-jap-Nip-F1	D	Chr1_42692368	1	42078395	42710210	1.53563	1.81682	1.19049	LOC_Os01g73710
CS-PBP-jap-Nip-F1	D	Chr1_42692368	1	42078395	42710210	1.53563	1.81682	1.19049	LOC_Os01g73040
CS-PBP-jap-Nip-F1	D	Chr1_42692368	1	42078395	42710210	1.53563	1.81682	1.19049	LOC_Os01g73670	1	1			P2MP	P2MP	P2MP
CS-PBP-jap-Nip-F1	D	Chr1_42692368	1	42078395	42710210	1.53563	1.81682	1.19049	LOC_Os01g73662					NoDiff	NoDiff	P2PD
CS-PBP-jap-Nip-F1	D	Chr1_42692368	1	42078395	42710210	1.53563	1.81682	1.19049	LOC_Os01g73220
CS-PBP-jap-Nip-F1	D	Chr1_42692368	1	42078395	42710210	1.53563	1.81682	1.19049	LOC_Os01g73730
CS-PBP-jap-Nip-F1	D	Chr1_42692368	1	42078395	42710210	1.53563	1.81682	1.19049	LOC_Os01g73720	1	1
CS-PBP-jap-Nip-F1	D	Chr1_42692368	1	42078395	42710210	1.53563	1.81682	1.19049	LOC_Os01g72550					NoDiff	NoDiff	P1ND
CS-PBP-jap-Nip-F1	OD	Chr1_980011	1	750487	2078311	0.614848	2.56702	19.934	LOC_Os01g02790
CS-PBP-jap-Nip-F1	OD	Chr1_980011	1	750487	2078311	0.614848	2.56702	19.934	LOC_Os01g02760	1
CS-PBP-jap-Nip-F1	OD	Chr1_980011	1	750487	2078311	0.614848	2.56702	19.934	LOC_Os01g02690
CS-PBP-jap-Nip-F1	OD	Chr1_980011	1	750487	2078311	0.614848	2.56702	19.934	LOC_Os01g02740
CS-PBP-jap-Nip-F1	OD	Chr1_980011	1	750487	2078311	0.614848	2.56702	19.934	LOC_Os01g02730	1				P1MP	NoDiff	P1MP	P2BLP
CS-PBP-jap-Nip-F1	OD	Chr1_980011	1	750487	2078311	0.614848	2.56702	19.934	LOC_Os01g04324
CS-PBP-jap-Nip-F1	OD	Chr1_980011	1	750487	2078311	0.614848	2.56702	19.934	LOC_Os01g04320
CS-PBP-jap-Nip-F1	OD	Chr1_980011	1	750487	2078311	0.614848	2.56702	19.934	LOC_Os01g02750
CS-PBP-jap-Nip-F1	OD	Chr1_980011	1	750487	2078311	0.614848	2.56702	19.934	LOC_Os01g02770
CS-PBP-jap-Nip-F1	OD	Chr1_980011	1	750487	2078311	0.614848	2.56702	19.934	LOC_Os01g04200	1
CS-PBP-jap-Nip-F1	OD	Chr1_980011	1	750487	2078311	0.614848	2.56702	19.934	LOC_Os01g02850	1
CS-PBP-jap-Nip-F1	OD	Chr1_980011	1	750487	2078311	0.614848	2.56702	19.934	LOC_Os01g04640
CS-PBP-jap-Nip-F1	OD	Chr1_980011	1	750487	2078311	0.614848	2.56702	19.934	LOC_Os01g04630
CS-PBP-jap-Nip-F1	OD	Chr1_980011	1	750487	2078311	0.614848	2.56702	19.934	LOC_Os01g02720	1	1						P2LP
CS-PBP-jap-Nip-F1	OD	Chr1_980011	1	750487	2078311	0.614848	2.56702	19.934	LOC_Os01g02670
CS-PBP-jap-Nip-F1	OD	Chr1_980011	1	750487	2078311	0.614848	2.56702	19.934	LOC_Os01g02550
CS-PBP-jap-Nip-F1	OD	Chr1_980011	1	750487	2078311	0.614848	2.56702	19.934	LOC_Os01g04540
CS-PBP-jap-Nip-F1	OD	Chr1_980011	1	750487	2078311	0.614848	2.56702	19.934	LOC_Os01g02570	1					P1MP	P1MP
CS-PBP-jap-Nip-F1	OD	Chr1_980011	1	750487	2078311	0.614848	2.56702	19.934	LOC_Os01g02370
CS-PBP-jap-Nip-F1	OD	Chr1_980011	1	750487	2078311	0.614848	2.56702	19.934	LOC_Os01g02660						P2PD
CS-PBP-jap-Nip-F1	OD	Chr1_980011	1	750487	2078311	0.614848	2.56702	19.934	LOC_Os01g02830	1
CS-PBP-jap-Nip-F1	OD	Chr1_980011	1	750487	2078311	0.614848	2.56702	19.934	LOC_Os01g02880	1
CS-PBP-jap-Nip-F1	OD	Chr1_980011	1	750487	2078311	0.614848	2.56702	19.934	LOC_Os01g02840						P2PD
CS-PBP-jap-Nip-F1	OD	Chr1_980011	1	750487	2078311	0.614848	2.56702	19.934	LOC_Os01g02680
CS-PBP-jap-Nip-F1	OD	Chr1_980011	1	750487	2078311	0.614848	2.56702	19.934	LOC_Os01g02560					P1MP	P1MP	P1MP
CS-PBP-jap-Nip-F1	OD	Chr1_980011	1	750487	2078311	0.614848	2.56702	19.934	LOC_Os01g02870	1
CS-PBP-jap-Nip-F1	OD	Chr1_980011	1	750487	2078311	0.614848	2.56702	19.934	LOC_Os01g02860	1	1
CS-PBP-jap-Nip-F1	OD	Chr1_980011	1	750487	2078311	0.614848	2.56702	19.934	LOC_Os01g02580	1
CS-PBP-jap-Nip-F1	OD	Chr11_19542056	11	19539105	19590843	0.496791	-1.11049	-2.24312	LOC_Os11g33110
CS-PBP-jap-Nip-F1	OD	Chr11_19542056	11	19539105	19590843	0.496791	-1.11049	-2.24312	LOC_Os11g33070
CS-PBP-jap-Nip-F1	OD	Chr11_19542056	11	19539105	19590843	0.496791	-1.11049	-2.24312	LOC_Os11g33100
CS-PBP-jap-Nip-F1	OD	Chr11_19542056	11	19539105	19590843	0.496791	-1.11049	-2.24312	LOC_Os11g33090	1				P2POD		NoDiff
CS-PBP-jap-Nip-F1	OD	Chr11_19674765	11	19600753	19701236	0.479004	-1.92246	-4.02435	LOC_Os11g33200
CS-PBP-jap-Nip-F1	OD	Chr11_19674765	11	19600753	19701236	0.479004	-1.92246	-4.02435	LOC_Os11g33210
CS-PBP-jap-Nip-F1	OD	Chr11_19674765	11	19600753	19701236	0.479004	-1.92246	-4.02435	LOC_Os11g33230
CS-PBP-jap-Nip-F1	OD	Chr11_19674765	11	19600753	19701236	0.479004	-1.92246	-4.02435	LOC_Os11g33150
CS-PBP-jap-Nip-F1	OD	Chr11_19674765	11	19600753	19701236	0.479004	-1.92246	-4.02435	LOC_Os11g33310
CS-PBP-jap-Nip-F1	OD	Chr11_19674765	11	19600753	19701236	0.479004	-1.92246	-4.02435	LOC_Os11g33220
CS-PBP-jap-Nip-F1	OD	Chr11_19674765	11	19600753	19701236	0.479004	-1.92246	-4.02435	LOC_Os11g33160
CS-PBP-jap-Nip-F1	OD	Chr11_19674765	11	19600753	19701236	0.479004	-1.92246	-4.02435	LOC_Os11g33270	1	1
CS-PBP-jap-Nip-F1	OD	Chr11_19674765	11	19600753	19701236	0.479004	-1.92246	-4.02435	LOC_Os11g33240	1
CS-PBP-jap-Nip-F1	OD	Chr11_19674765	11	19600753	19701236	0.479004	-1.92246	-4.02435	LOC_Os11g33250
CS-PBP-jap-Nip-F1	OD	Chr11_19674765	11	19600753	19701236	0.479004	-1.92246	-4.02435	LOC_Os11g33180
CS-PBP-jap-Nip-F1	OD	Chr11_19674765	11	19600753	19701236	0.479004	-1.92246	-4.02435	LOC_Os11g33190
CS-PBP-jap-Nip-F1	A	Chr11_23615767	11	23614032	23672336	0.778737	0.266563	0.353061	LOC_Os11g39720
CS-PBP-jap-Nip-F1	A	Chr11_23615767	11	23614032	23672336	0.778737	0.266563	0.353061	LOC_Os11g39650	1
CS-PBP-jap-Nip-F1	OD	Chr11_26401251	11	26374142	27143101	0.568212	-1.58172	-3.11581	LOC_Os11g44810	1							P2LP
CS-PBP-jap-Nip-F1	OD	Chr11_26401251	11	26374142	27143101	0.568212	-1.58172	-3.11581	LOC_Os11g43720
CS-PBP-jap-Nip-F1	OD	Chr11_26401251	11	26374142	27143101	0.568212	-1.58172	-3.11581	LOC_Os11g44600	1				NoDiff	P2ND	P2ND
CS-PBP-jap-Nip-F1	OD	Chr11_26401251	11	26374142	27143101	0.568212	-1.58172	-3.11581	LOC_Os11g43700	1					P2MP
CS-PBP-jap-Nip-F1	OD	Chr11_26401251	11	26374142	27143101	0.568212	-1.58172	-3.11581	LOC_Os11g43690
CS-PBP-jap-Nip-F1	OD	Chr11_26401251	11	26374142	27143101	0.568212	-1.58172	-3.11581	LOC_Os11g43710
CS-PBP-jap-Nip-F1	OD	Chr11_27169039	11	27143888	27390492	0.572213	-1.11177	-2.00569	LOC_Os11g44920	1	1			NoDiff	P2PD
CS-PBP-jap-Nip-F1	OD	Chr11_27169039	11	27143888	27390492	0.572213	-1.11177	-2.00569	LOC_Os11g45110
CS-PBP-jap-Nip-F1	OD	Chr11_27169039	11	27143888	27390492	0.572213	-1.11177	-2.00569	LOC_Os11g44850
CS-PBP-jap-Nip-F1	OD	Chr11_27169039	11	27143888	27390492	0.572213	-1.11177	-2.00569	LOC_Os11g45030					P2POD	P1POD
CS-PBP-jap-Nip-F1	OD	Chr11_27169039	11	27143888	27390492	0.572213	-1.11177	-2.00569	LOC_Os11g45250	1
CS-PBP-jap-Nip-F1	OD	Chr11_27169039	11	27143888	27390492	0.572213	-1.11177	-2.00569	LOC_Os11g44900	1	1						P1BLP
CS-PBP-jap-Nip-F1	OD	Chr11_27169039	11	27143888	27390492	0.572213	-1.11177	-2.00569	LOC_Os11g44860
CS-PBP-jap-Nip-F1	OD	Chr11_27169039	11	27143888	27390492	0.572213	-1.11177	-2.00569	LOC_Os11g44970					NoDiff	P1MP	P1PD
CS-PBP-jap-Nip-F1	OD	Chr11_27169039	11	27143888	27390492	0.572213	-1.11177	-2.00569	LOC_Os11g44890	1				P2MP
CS-PBP-jap-Nip-F1	OD	Chr11_27169039	11	27143888	27390492	0.572213	-1.11177	-2.00569	LOC_Os11g44870
CS-PBP-jap-Nip-F1	OD	Chr11_27169039	11	27143888	27390492	0.572213	-1.11177	-2.00569	LOC_Os11g44910	1	1
CS-PBP-jap-Nip-F1	OD	Chr11_27407721	11	27398147	27438902	0.553616	-1.85612	-3.74885	LOC_Os11g45290
CS-PBP-jap-Nip-F1	OD	Chr11_27407721	11	27398147	27438902	0.553616	-1.85612	-3.74885	LOC_Os11g45360
CS-PBP-jap-Nip-F1	OD	Chr11_27407721	11	27398147	27438902	0.553616	-1.85612	-3.74885	LOC_Os11g45320
CS-PBP-jap-Nip-F1	OD	Chr11_27407721	11	27398147	27438902	0.553616	-1.85612	-3.74885	LOC_Os11g45350
CS-PBP-jap-Nip-F1	OD	Chr11_27407721	11	27398147	27438902	0.553616	-1.85612	-3.74885	LOC_Os11g45330
CS-PBP-jap-Nip-F1	OD	Chr11_27407721	11	27398147	27438902	0.553616	-1.85612	-3.74885	LOC_Os11g45280	1							P1LP
CS-PBP-jap-Nip-F1	OD	Chr11_28912817	11	28823436	28915722	0.531281	-1.94101	-3.66184	LOC_Os11g47800	1	1
CS-PBP-jap-Nip-F1	OD	Chr11_28912817	11	28823436	28915722	0.531281	-1.94101	-3.66184	LOC_Os11g47809	1							P1LP
CS-PBP-jap-Nip-F1	OD	Chr11_28912817	11	28823436	28915722	0.531281	-1.94101	-3.66184	LOC_Os11g47830	1	1
CS-PBP-jap-Nip-F1	OD	Chr11_28912817	11	28823436	28915722	0.531281	-1.94101	-3.66184	LOC_Os11g47920
CS-PBP-jap-Nip-F1	OD	Chr11_28912817	11	28823436	28915722	0.531281	-1.94101	-3.66184	LOC_Os11g47900	1	1
CS-PBP-jap-Nip-F1	OD	Chr11_28912817	11	28823436	28915722	0.531281	-1.94101	-3.66184	LOC_Os11g47910	1							P2LP
CS-PBP-jap-Nip-F1	OD	Chr11_28912817	11	28823436	28915722	0.531281	-1.94101	-3.66184	LOC_Os11g47940
CS-PBP-jap-Nip-F1	OD	Chr11_28912817	11	28823436	28915722	0.531281	-1.94101	-3.66184	LOC_Os11g47890
CS-PBP-jap-Nip-F1	OD	Chr11_28912817	11	28823436	28915722	0.531281	-1.94101	-3.66184	LOC_Os11g47860						NoDiff	CNOD
CS-PBP-jap-Nip-F1	D	Chr12_17925512	12	17901330	17992558	1.48359	0.854552	0.581797	LOC_Os12g30040	1	1
CS-PBP-jap-Nip-F1	D	Chr12_17925512	12	17901330	17992558	1.48359	0.854552	0.581797	LOC_Os12g29990					NoDiff	P2PD	NoDiff
CS-PBP-jap-Nip-F1	D	Chr12_17925512	12	17901330	17992558	1.48359	0.854552	0.581797	LOC_Os12g30030
CS-PBP-jap-Nip-F1	D	Chr12_17925512	12	17901330	17992558	1.48359	0.854552	0.581797	LOC_Os12g29950
CS-PBP-jap-Nip-F1	D	Chr12_17925512	12	17901330	17992558	1.48359	0.854552	0.581797	LOC_Os12g30020	1	1
CS-PBP-jap-Nip-F1	D	Chr12_17925512	12	17901330	17992558	1.48359	0.854552	0.581797	LOC_Os12g29980	1	1			NoDiff	NoDiff	P1MP
CS-PBP-jap-Nip-F1	D	Chr12_17925512	12	17901330	17992558	1.48359	0.854552	0.581797	LOC_Os12g30000
CS-PBP-jap-Nip-F1	D	Chr12_18008113	12	17993166	18121008	0.318914	-0.162652	-0.529504	LOC_Os12g30130
CS-PBP-jap-Nip-F1	D	Chr12_18008113	12	17993166	18121008	0.318914	-0.162652	-0.529504	LOC_Os12g30060	1	1
CS-PBP-jap-Nip-F1	D	Chr12_18008113	12	17993166	18121008	0.318914	-0.162652	-0.529504	LOC_Os12g30120					NoDiff	NoDiff	P2ND
CS-PBP-jap-Nip-F1	D	Chr12_18008113	12	17993166	18121008	0.318914	-0.162652	-0.529504	LOC_Os12g30050
CS-PBP-jap-Nip-F1	D	Chr12_18008113	12	17993166	18121008	0.318914	-0.162652	-0.529504	LOC_Os12g30070
CS-PBP-jap-Nip-F1	D	Chr12_18008113	12	17993166	18121008	0.318914	-0.162652	-0.529504	LOC_Os12g30080
CS-PBP-jap-Nip-F1	OD	Chr12_19350723	12	18855774	20855620	0.181487	-0.937972	-4.51446	LOC_Os12g31485
CS-PBP-jap-Nip-F1	OD	Chr12_19350723	12	18855774	20855620	0.181487	-0.937972	-4.51446	LOC_Os12g33620
CS-PBP-jap-Nip-F1	OD	Chr12_19350723	12	18855774	20855620	0.181487	-0.937972	-4.51446	LOC_Os12g34280
CS-PBP-jap-Nip-F1	OD	Chr12_19350723	12	18855774	20855620	0.181487	-0.937972	-4.51446	LOC_Os12g32740	1
CS-PBP-jap-Nip-F1	OD	Chr12_19350723	12	18855774	20855620	0.181487	-0.937972	-4.51446	LOC_Os12g33060
CS-PBP-jap-Nip-F1	OD	Chr12_19350723	12	18855774	20855620	0.181487	-0.937972	-4.51446	LOC_Os12g34350	1
CS-PBP-jap-Nip-F1	OD	Chr12_19350723	12	18855774	20855620	0.181487	-0.937972	-4.51446	LOC_Os12g32040
CS-PBP-jap-Nip-F1	OD	Chr12_19350723	12	18855774	20855620	0.181487	-0.937972	-4.51446	LOC_Os12g32810
CS-PBP-jap-Nip-F1	OD	Chr12_19350723	12	18855774	20855620	0.181487	-0.937972	-4.51446	LOC_Os12g34380					NoDiff	P2ND	P1POD
CS-PBP-jap-Nip-F1	OD	Chr12_19350723	12	18855774	20855620	0.181487	-0.937972	-4.51446	LOC_Os12g34370	1	1
CS-PBP-jap-Nip-F1	OD	Chr12_19350723	12	18855774	20855620	0.181487	-0.937972	-4.51446	LOC_Os12g34390
CS-PBP-jap-Nip-F1	OD	Chr12_19350723	12	18855774	20855620	0.181487	-0.937972	-4.51446	LOC_Os12g32970
CS-PBP-jap-Nip-F1	OD	Chr12_19350723	12	18855774	20855620	0.181487	-0.937972	-4.51446	LOC_Os12g31810	1	1
CS-PBP-jap-Nip-F1	OD	Chr12_19350723	12	18855774	20855620	0.181487	-0.937972	-4.51446	LOC_Os12g31430
CS-PBP-jap-Nip-F1	OD	Chr12_19350723	12	18855774	20855620	0.181487	-0.937972	-4.51446	LOC_Os12g31960
CS-PBP-jap-Nip-F1	OD	Chr12_19350723	12	18855774	20855620	0.181487	-0.937972	-4.51446	LOC_Os12g32374
CS-PBP-jap-Nip-F1	OD	Chr12_19350723	12	18855774	20855620	0.181487	-0.937972	-4.51446	LOC_Os12g32380	1	1						P1OHP
CS-PBP-jap-Nip-F1	OD	Chr12_19350723	12	18855774	20855620	0.181487	-0.937972	-4.51446	LOC_Os12g32750	1	1
CS-PBP-jap-Nip-F1	OD	Chr12_19350723	12	18855774	20855620	0.181487	-0.937972	-4.51446	LOC_Os12g32770
CS-PBP-jap-Nip-F1	OD	Chr12_19350723	12	18855774	20855620	0.181487	-0.937972	-4.51446	LOC_Os12g32590	1	1
CS-PBP-jap-Nip-F1	OD	Chr12_19350723	12	18855774	20855620	0.181487	-0.937972	-4.51446	LOC_Os12g33150
CS-PBP-jap-Nip-F1	OD	Chr12_19350723	12	18855774	20855620	0.181487	-0.937972	-4.51446	LOC_Os12g32450	1							P1BLP
CS-PBP-jap-Nip-F1	OD	Chr12_19350723	12	18855774	20855620	0.181487	-0.937972	-4.51446	LOC_Os12g31490	1
CS-PBP-jap-Nip-F1	OD	Chr12_19350723	12	18855774	20855620	0.181487	-0.937972	-4.51446	LOC_Os12g32330	1	1						P1HP
CS-PBP-jap-Nip-F1	OD	Chr12_19350723	12	18855774	20855620	0.181487	-0.937972	-4.51446	LOC_Os12g32120
CS-PBP-jap-Nip-F1	OD	Chr12_19350723	12	18855774	20855620	0.181487	-0.937972	-4.51446	LOC_Os12g34400	1				P1MP			P1HP
CS-PBP-jap-Nip-F1	OD	Chr12_19350723	12	18855774	20855620	0.181487	-0.937972	-4.51446	LOC_Os12g31990
CS-PBP-jap-Nip-F1	OD	Chr12_19350723	12	18855774	20855620	0.181487	-0.937972	-4.51446	LOC_Os12g32440	1				NoDiff		P2POD
CS-PBP-jap-Nip-F1	OD	Chr12_19350723	12	18855774	20855620	0.181487	-0.937972	-4.51446	LOC_Os12g31350	1	1			NoDiff	NoDiff	P1NOD
CS-PBP-jap-Nip-F1	OD	Chr12_19350723	12	18855774	20855620	0.181487	-0.937972	-4.51446	LOC_Os12g32850
CS-PBP-jap-Nip-F1	OD	Chr12_19350723	12	18855774	20855620	0.181487	-0.937972	-4.51446	LOC_Os12g32180	1	1
CS-PBP-jap-Nip-F1	OD	Chr12_19350723	12	18855774	20855620	0.181487	-0.937972	-4.51446	LOC_Os12g33780
CS-PBP-jap-Nip-F1	OD	Chr12_19350723	12	18855774	20855620	0.181487	-0.937972	-4.51446	LOC_Os12g34330	1	1			NoDiff		P1PD	P2LP
CS-PBP-jap-Nip-F1	OD	Chr12_19350723	12	18855774	20855620	0.181487	-0.937972	-4.51446	LOC_Os12g34360
CS-PBP-jap-Nip-F1	OD	Chr12_19350723	12	18855774	20855620	0.181487	-0.937972	-4.51446	LOC_Os12g34410
CS-PBP-jap-Nip-F1	OD	Chr12_19350723	12	18855774	20855620	0.181487	-0.937972	-4.51446	LOC_Os12g32130	1	1			P1MP	P1MP		P1BLP
CS-PBP-jap-Nip-F1	OD	Chr12_19350723	12	18855774	20855620	0.181487	-0.937972	-4.51446	LOC_Os12g31480	1
CS-PBP-jap-Nip-F1	OD	Chr12_19350723	12	18855774	20855620	0.181487	-0.937972	-4.51446	LOC_Os12g31710
CS-PBP-jap-Nip-F1	OD	Chr12_19350723	12	18855774	20855620	0.181487	-0.937972	-4.51446	LOC_Os12g33360
CS-PBP-jap-Nip-F1	OD	Chr12_19350723	12	18855774	20855620	0.181487	-0.937972	-4.51446	LOC_Os12g32150
CS-PBP-jap-Nip-F1	OD	Chr12_19350723	12	18855774	20855620	0.181487	-0.937972	-4.51446	LOC_Os12g32640	1				P1MP	NoDiff	P1PD
CS-PBP-jap-Nip-F1	OD	Chr12_19350723	12	18855774	20855620	0.181487	-0.937972	-4.51446	LOC_Os12g32200					P1POD	P2POD	NoDiff
CS-PBP-jap-Nip-F1	OD	Chr12_19350723	12	18855774	20855620	0.181487	-0.937972	-4.51446	LOC_Os12g31748	1							P1OHP
CS-PBP-jap-Nip-F1	OD	Chr12_19350723	12	18855774	20855620	0.181487	-0.937972	-4.51446	LOC_Os12g33010
CS-PBP-jap-Nip-F1	OD	Chr12_19350723	12	18855774	20855620	0.181487	-0.937972	-4.51446	LOC_Os12g32986	1							P2BLP
CS-PBP-jap-Nip-F1	OD	Chr12_19350723	12	18855774	20855620	0.181487	-0.937972	-4.51446	LOC_Os12g33230	1	1				P2MP
CS-PBP-jap-Nip-F1	OD	Chr12_19350723	12	18855774	20855620	0.181487	-0.937972	-4.51446	LOC_Os12g32030
CS-PBP-jap-Nip-F1	OD	Chr12_19350723	12	18855774	20855620	0.181487	-0.937972	-4.51446	LOC_Os12g32160
CS-PBP-jap-Nip-F1	OD	Chr12_19350723	12	18855774	20855620	0.181487	-0.937972	-4.51446	LOC_Os12g34200
CS-PBP-jap-Nip-F1	OD	Chr12_19350723	12	18855774	20855620	0.181487	-0.937972	-4.51446	LOC_Os12g33020	1				NoDiff	NoDiff	P1ND
CS-PBP-jap-Nip-F1	OD	Chr12_19350723	12	18855774	20855620	0.181487	-0.937972	-4.51446	LOC_Os12g31890	1				NoDiff	CPOD	NoDiff	P1LP
CS-PBP-jap-Nip-F1	OD	Chr12_19350723	12	18855774	20855620	0.181487	-0.937972	-4.51446	LOC_Os12g32050
CS-PBP-jap-Nip-F1	OD	Chr12_19350723	12	18855774	20855620	0.181487	-0.937972	-4.51446	LOC_Os12g32010
CS-PBP-jap-Nip-F1	OD	Chr12_19350723	12	18855774	20855620	0.181487	-0.937972	-4.51446	LOC_Os12g33000					P1ND	NoDiff	CPOD
CS-PBP-jap-Nip-F1	OD	Chr12_20870844	12	20856389	21198583	0.157937	0.667889	11.7155	LOC_Os12g34802
CS-PBP-jap-Nip-F1	OD	Chr12_20870844	12	20856389	21198583	0.157937	0.667889	11.7155	LOC_Os12g34720
CS-PBP-jap-Nip-F1	OD	Chr12_20870844	12	20856389	21198583	0.157937	0.667889	11.7155	LOC_Os12g34780
CS-PBP-jap-Nip-F1	OD	Chr12_20870844	12	20856389	21198583	0.157937	0.667889	11.7155	LOC_Os12g34650
CS-PBP-jap-Nip-F1	OD	Chr12_20870844	12	20856389	21198583	0.157937	0.667889	11.7155	LOC_Os12g34490
CS-PBP-jap-Nip-F1	OD	Chr12_20870844	12	20856389	21198583	0.157937	0.667889	11.7155	LOC_Os12g34440	1
CS-PBP-jap-Nip-F1	OD	Chr12_20870844	12	20856389	21198583	0.157937	0.667889	11.7155	LOC_Os12g34430
CS-PBP-jap-Nip-F1	OD	Chr12_20870844	12	20856389	21198583	0.157937	0.667889	11.7155	LOC_Os12g34460	1	1
CS-PBP-jap-Nip-F1	OD	Chr12_20870844	12	20856389	21198583	0.157937	0.667889	11.7155	LOC_Os12g34550
CS-PBP-jap-Nip-F1	OD	Chr12_20870844	12	20856389	21198583	0.157937	0.667889	11.7155	LOC_Os12g34760
CS-PBP-jap-Nip-F1	OD	Chr12_20870844	12	20856389	21198583	0.157937	0.667889	11.7155	LOC_Os12g34540
CS-PBP-jap-Nip-F1	OD	Chr12_20870844	12	20856389	21198583	0.157937	0.667889	11.7155	LOC_Os12g34510	1	1
CS-PBP-jap-Nip-F1	OD	Chr12_20870844	12	20856389	21198583	0.157937	0.667889	11.7155	LOC_Os12g34770
CS-PBP-jap-Nip-F1	OD	Chr12_20870844	12	20856389	21198583	0.157937	0.667889	11.7155	LOC_Os12g34480
CS-PBP-jap-Nip-F1	OD	Chr12_20870844	12	20856389	21198583	0.157937	0.667889	11.7155	LOC_Os12g34796	1				NoDiff	NoDiff	P1ND
CS-PBP-jap-Nip-F1	OD	Chr12_20870844	12	20856389	21198583	0.157937	0.667889	11.7155	LOC_Os12g34500	1	1
CS-PBP-jap-Nip-F1	OD	Chr12_20870844	12	20856389	21198583	0.157937	0.667889	11.7155	LOC_Os12g34470
CS-PBP-jap-Nip-F1	OD	Chr12_20870844	12	20856389	21198583	0.157937	0.667889	11.7155	LOC_Os12g34560
CS-PBP-jap-Nip-F1	OD	Chr12_20870844	12	20856389	21198583	0.157937	0.667889	11.7155	LOC_Os12g34419
CS-PBP-jap-Nip-F1	OD	Chr12_20870844	12	20856389	21198583	0.157937	0.667889	11.7155	LOC_Os12g34450
CS-PBP-jap-Nip-F1	OD	Chr12_20870844	12	20856389	21198583	0.157937	0.667889	11.7155	LOC_Os12g34524
CS-PBP-jap-Nip-F1	OD	Chr12_20870844	12	20856389	21198583	0.157937	0.667889	11.7155	LOC_Os12g34750
CS-PBP-jap-Nip-F1	OD	Chr12_27088708	12	27022577	27091103	0.420005	-2.03149	-5.3604	LOC_Os12g43580
CS-PBP-jap-Nip-F1	OD	Chr12_27088708	12	27022577	27091103	0.420005	-2.03149	-5.3604	LOC_Os12g43550	1				NoDiff	NoDiff	P1ND
CS-PBP-jap-Nip-F1	OD	Chr12_27088708	12	27022577	27091103	0.420005	-2.03149	-5.3604	LOC_Os12g43590	1	1					P2POD
CS-PBP-jap-Nip-F1	OD	Chr12_27088708	12	27022577	27091103	0.420005	-2.03149	-5.3604	LOC_Os12g43570
CS-PBP-jap-Nip-F1	OD	Chr12_27088708	12	27022577	27091103	0.420005	-2.03149	-5.3604	LOC_Os12g43560
CS-PBP-jap-Nip-F1	OD	Chr12_27088708	12	27022577	27091103	0.420005	-2.03149	-5.3604	LOC_Os12g43600	1							P2BLP
CS-PBP-jap-Nip-F1	OD	Chr12_27088708	12	27022577	27091103	0.420005	-2.03149	-5.3604	LOC_Os12g43620
CS-PBP-jap-Nip-F1	OD	Chr12_27088708	12	27022577	27091103	0.420005	-2.03149	-5.3604	LOC_Os12g43564
CS-PBP-jap-Nip-F1	OD	Chr2_24151150	2	24147588	25052000	1.17398	-2.52211	-2.21894	LOC_Os02g39940
CS-PBP-jap-Nip-F1	OD	Chr2_24151150	2	24147588	25052000	1.17398	-2.52211	-2.21894	LOC_Os02g41710						P2PD
CS-PBP-jap-Nip-F1	OD	Chr2_24151150	2	24147588	25052000	1.17398	-2.52211	-2.21894	LOC_Os02g39990	1	1
CS-PBP-jap-Nip-F1	OD	Chr2_24151150	2	24147588	25052000	1.17398	-2.52211	-2.21894	LOC_Os02g39920	1	1						P1BLP
CS-PBP-jap-Nip-F1	OD	Chr2_24151150	2	24147588	25052000	1.17398	-2.52211	-2.21894	LOC_Os02g39970	1				P2PD	P2PD	P2PD	P2BLP
CS-PBP-jap-Nip-F1	OD	Chr2_24151150	2	24147588	25052000	1.17398	-2.52211	-2.21894	LOC_Os02g40040	1
CS-PBP-jap-Nip-F1	OD	Chr2_24151150	2	24147588	25052000	1.17398	-2.52211	-2.21894	LOC_Os02g41500
CS-PBP-jap-Nip-F1	OD	Chr2_24151150	2	24147588	25052000	1.17398	-2.52211	-2.21894	LOC_Os02g40784	1	1						P1BLP
CS-PBP-jap-Nip-F1	OD	Chr2_24151150	2	24147588	25052000	1.17398	-2.52211	-2.21894	LOC_Os02g40030	1			OsNST1; BC14
CS-PBP-jap-Nip-F1	OD	Chr2_24151150	2	24147588	25052000	1.17398	-2.52211	-2.21894	LOC_Os02g40800
CS-PBP-jap-Nip-F1	OD	Chr2_24151150	2	24147588	25052000	1.17398	-2.52211	-2.21894	LOC_Os02g39950	1	1						P1HP
CS-PBP-jap-Nip-F1	OD	Chr2_24151150	2	24147588	25052000	1.17398	-2.52211	-2.21894	LOC_Os02g40000	1	1						P1HP
CS-PBP-jap-Nip-F1	OD	Chr2_24151150	2	24147588	25052000	1.17398	-2.52211	-2.21894	LOC_Os02g40400	1							P2HP
CS-PBP-jap-Nip-F1	OD	Chr2_24151150	2	24147588	25052000	1.17398	-2.52211	-2.21894	LOC_Os02g40020
CS-PBP-jap-Nip-F1	OD	Chr2_24151150	2	24147588	25052000	1.17398	-2.52211	-2.21894	LOC_Os02g41470	1
CS-PBP-jap-Nip-F1	OD	Chr2_24151150	2	24147588	25052000	1.17398	-2.52211	-2.21894	LOC_Os02g39980
CS-PBP-jap-Nip-F1	OD	Chr2_24151150	2	24147588	25052000	1.17398	-2.52211	-2.21894	LOC_Os02g41450
CS-PBP-jap-Nip-F1	OD	Chr2_24151150	2	24147588	25052000	1.17398	-2.52211	-2.21894	LOC_Os02g40010	1	1						P2LP
CS-PBP-jap-Nip-F1	OD	Chr2_24151150	2	24147588	25052000	1.17398	-2.52211	-2.21894	LOC_Os02g40950
CS-PBP-jap-Nip-F1	OD	Chr2_24151150	2	24147588	25052000	1.17398	-2.52211	-2.21894	LOC_Os02g39960
CS-PBP-jap-Nip-F1	OD	Chr3_14435433	3	14329137	14955591	0.978027	1.8047	1.85299	LOC_Os03g25280
CS-PBP-jap-Nip-F1	OD	Chr3_14435433	3	14329137	14955591	0.978027	1.8047	1.85299	LOC_Os03g25100
CS-PBP-jap-Nip-F1	OD	Chr3_14435433	3	14329137	14955591	0.978027	1.8047	1.85299	LOC_Os03g25220
CS-PBP-jap-Nip-F1	OD	Chr3_14435433	3	14329137	14955591	0.978027	1.8047	1.85299	LOC_Os03g25289
CS-PBP-jap-Nip-F1	OD	Chr3_14435433	3	14329137	14955591	0.978027	1.8047	1.85299	LOC_Os03g25250
CS-PBP-jap-Nip-F1	OD	Chr3_14435433	3	14329137	14955591	0.978027	1.8047	1.85299	LOC_Os03g25240
CS-PBP-jap-Nip-F1	OD	Chr3_14435433	3	14329137	14955591	0.978027	1.8047	1.85299	LOC_Os03g25090
CS-PBP-jap-Nip-F1	OD	Chr3_14435433	3	14329137	14955591	0.978027	1.8047	1.85299	LOC_Os03g25310
CS-PBP-jap-Nip-F1	OD	Chr3_14435433	3	14329137	14955591	0.978027	1.8047	1.85299	LOC_Os03g25270	1
CS-PBP-jap-Nip-F1	OD	Chr3_14435433	3	14329137	14955591	0.978027	1.8047	1.85299	LOC_Os03g25260	1	1
CS-PBP-jap-Nip-F1	OD	Chr3_14435433	3	14329137	14955591	0.978027	1.8047	1.85299	LOC_Os03g25314
CS-PBP-jap-Nip-F1	OD	Chr3_14435433	3	14329137	14955591	0.978027	1.8047	1.85299	LOC_Os03g25300
CS-PBP-jap-Nip-F1	OD	Chr3_14435433	3	14329137	14955591	0.978027	1.8047	1.85299	LOC_Os03g25210	1
CS-PBP-jap-Nip-F1	OD	Chr3_14435433	3	14329137	14955591	0.978027	1.8047	1.85299	LOC_Os03g25304
CS-PBP-jap-Nip-F1	D	Chr3_22210369	3	21878091	22210621	0.502737	-0.679241	-1.36557	LOC_Os03g39860	1	1
CS-PBP-jap-Nip-F1	D	Chr3_22210369	3	21878091	22210621	0.502737	-0.679241	-1.36557	LOC_Os03g39850
CS-PBP-jap-Nip-F1	D	Chr3_22210369	3	21878091	22210621	0.502737	-0.679241	-1.36557	LOC_Os03g39690
CS-PBP-jap-Nip-F1	D	Chr3_22210369	3	21878091	22210621	0.502737	-0.679241	-1.36557	LOC_Os03g39356
CS-PBP-jap-Nip-F1	D	Chr3_22210369	3	21878091	22210621	0.502737	-0.679241	-1.36557	LOC_Os03g39880	1	1
CS-PBP-jap-Nip-F1	D	Chr3_22210369	3	21878091	22210621	0.502737	-0.679241	-1.36557	LOC_Os03g39970
CS-PBP-jap-Nip-F1	D	Chr3_22210369	3	21878091	22210621	0.502737	-0.679241	-1.36557	LOC_Os03g39598
CS-PBP-jap-Nip-F1	D	Chr3_28227664	3	27861545	28322183	0.68822	-0.73971	-1.07675	LOC_Os03g49200	1	1
CS-PBP-jap-Nip-F1	D	Chr3_28227664	3	27861545	28322183	0.68822	-0.73971	-1.07675	LOC_Os03g49150
CS-PBP-jap-Nip-F1	D	Chr3_28227664	3	27861545	28322183	0.68822	-0.73971	-1.07675	LOC_Os03g49690
CS-PBP-jap-Nip-F1	D	Chr3_28227664	3	27861545	28322183	0.68822	-0.73971	-1.07675	LOC_Os03g49080					NoDiff	P2PD	NoDiff
CS-PBP-jap-Nip-F1	D	Chr3_28227664	3	27861545	28322183	0.68822	-0.73971	-1.07675	LOC_Os03g49530	1
CS-PBP-jap-Nip-F1	D	Chr3_28227664	3	27861545	28322183	0.68822	-0.73971	-1.07675	LOC_Os03g49430	1
CS-PBP-jap-Nip-F1	D	Chr3_28227664	3	27861545	28322183	0.68822	-0.73971	-1.07675	LOC_Os03g49440	1
CS-PBP-jap-Nip-F1	D	Chr3_28227664	3	27861545	28322183	0.68822	-0.73971	-1.07675	LOC_Os03g49710	1				NoDiff	NoDiff	P1ND
CS-PBP-jap-Nip-F1	D	Chr3_28227664	3	27861545	28322183	0.68822	-0.73971	-1.07675	LOC_Os03g49190
CS-PBP-jap-Nip-F1	D	Chr3_28227664	3	27861545	28322183	0.68822	-0.73971	-1.07675	LOC_Os03g49400	1	1						P2BLP
CS-PBP-jap-Nip-F1	D	Chr3_28227664	3	27861545	28322183	0.68822	-0.73971	-1.07675	LOC_Os03g49510	1			OsPIPK1
CS-PBP-jap-Nip-F1	D	Chr3_28227664	3	27861545	28322183	0.68822	-0.73971	-1.07675	LOC_Os03g48930	1	1
CS-PBP-jap-Nip-F1	D	Chr3_28227664	3	27861545	28322183	0.68822	-0.73971	-1.07675	LOC_Os03g49380	1
CS-PBP-jap-Nip-F1	D	Chr3_28227664	3	27861545	28322183	0.68822	-0.73971	-1.07675	LOC_Os03g49410
CS-PBP-jap-Nip-F1	D	Chr3_28227664	3	27861545	28322183	0.68822	-0.73971	-1.07675	LOC_Os03g49590					NoDiff	NoDiff	P1POD
CS-PBP-jap-Nip-F1	D	Chr3_28227664	3	27861545	28322183	0.68822	-0.73971	-1.07675	LOC_Os03g49040	1				NoDiff	P1PD	CNOD
CS-PBP-jap-Nip-F1	D	Chr3_28227664	3	27861545	28322183	0.68822	-0.73971	-1.07675	LOC_Os03g49020
CS-PBP-jap-Nip-F1	D	Chr3_28227664	3	27861545	28322183	0.68822	-0.73971	-1.07675	LOC_Os03g49610	1	1
CS-PBP-jap-Nip-F1	D	Chr3_28227664	3	27861545	28322183	0.68822	-0.73971	-1.07675	LOC_Os03g49420	1	1						P1BLP
CS-PBP-jap-Nip-F1	D	Chr3_28227664	3	27861545	28322183	0.68822	-0.73971	-1.07675	LOC_Os03g49570	1	1
CS-PBP-jap-Nip-F1	D	Chr3_28227664	3	27861545	28322183	0.68822	-0.73971	-1.07675	LOC_Os03g49680
CS-PBP-jap-Nip-F1	D	Chr3_28227664	3	27861545	28322183	0.68822	-0.73971	-1.07675	LOC_Os03g49600	1	1
CS-PBP-jap-Nip-F1	D	Chr3_28227664	3	27861545	28322183	0.68822	-0.73971	-1.07675	LOC_Os03g49450
CS-PBP-jap-Nip-F1	D	Chr3_28227664	3	27861545	28322183	0.68822	-0.73971	-1.07675	LOC_Os03g49730	1	1
CS-PBP-jap-Nip-F1	D	Chr3_28227664	3	27861545	28322183	0.68822	-0.73971	-1.07675	LOC_Os03g48970	1			OsHAP2D				P1OHP
CS-PBP-jap-Nip-F1	D	Chr3_28227664	3	27861545	28322183	0.68822	-0.73971	-1.07675	LOC_Os03g49740
CS-PBP-jap-Nip-F1	D	Chr3_28227664	3	27861545	28322183	0.68822	-0.73971	-1.07675	LOC_Os03g49750	1	1
CS-PBP-jap-Nip-F1	D	Chr3_28227664	3	27861545	28322183	0.68822	-0.73971	-1.07675	LOC_Os03g49580	1	1
CS-PBP-jap-Nip-F1	D	Chr3_28227664	3	27861545	28322183	0.68822	-0.73971	-1.07675	LOC_Os03g49070	1				P1MP		P1MP	P2HP
CS-PBP-jap-Nip-F1	D	Chr3_28227664	3	27861545	28322183	0.68822	-0.73971	-1.07675	LOC_Os03g49485	1							P2HP
CS-PBP-jap-Nip-F1	D	Chr3_28227664	3	27861545	28322183	0.68822	-0.73971	-1.07675	LOC_Os03g49120
CS-PBP-jap-Nip-F1	D	Chr3_28227664	3	27861545	28322183	0.68822	-0.73971	-1.07675	LOC_Os03g49700
CS-PBP-jap-Nip-F1	D	Chr3_28227664	3	27861545	28322183	0.68822	-0.73971	-1.07675	LOC_Os03g49500	1	1
CS-PBP-jap-Nip-F1	D	Chr3_28227664	3	27861545	28322183	0.68822	-0.73971	-1.07675	LOC_Os03g49520	1	1			P2NOD	P1POD
CS-PBP-jap-Nip-F1	D	Chr3_28227664	3	27861545	28322183	0.68822	-0.73971	-1.07675	LOC_Os03g49490	1
CS-PBP-jap-Nip-F1	D	Chr3_28227664	3	27861545	28322183	0.68822	-0.73971	-1.07675	LOC_Os03g49720	1							P2LP
CS-PBP-jap-Nip-F1	D	Chr3_28227664	3	27861545	28322183	0.68822	-0.73971	-1.07675	LOC_Os03g49210	1	1
CS-PBP-jap-Nip-F1	D	Chr3_28227664	3	27861545	28322183	0.68822	-0.73971	-1.07675	LOC_Os03g49480	1							P1HP
CS-PBP-jap-Nip-F1	D	Chr3_28227664	3	27861545	28322183	0.68822	-0.73971	-1.07675	LOC_Os03g49660
CS-PBP-jap-Nip-F1	D	Chr3_28227664	3	27861545	28322183	0.68822	-0.73971	-1.07675	LOC_Os03g49464
CS-PBP-jap-Nip-F1	OD	Chr3_28349147	3	28342877	28372168	0.520038	-1.1055	-2.13242	LOC_Os03g49790
CS-PBP-jap-Nip-F1	OD	Chr3_28349147	3	28342877	28372168	0.520038	-1.1055	-2.13242	LOC_Os03g49820
CS-PBP-jap-Nip-F1	D	Chr3_8448510	3	8134982	8501159	0.675897	-0.696717	-1.03121	LOC_Os03g15470
CS-PBP-jap-Nip-F1	D	Chr3_8448510	3	8134982	8501159	0.675897	-0.696717	-1.03121	LOC_Os03g15480	1							P1OHP
CS-PBP-jap-Nip-F1	D	Chr3_8448510	3	8134982	8501159	0.675897	-0.696717	-1.03121	LOC_Os03g15190	1	1
CS-PBP-jap-Nip-F1	D	Chr3_8448510	3	8134982	8501159	0.675897	-0.696717	-1.03121	LOC_Os03g15090
CS-PBP-jap-Nip-F1	D	Chr3_8448510	3	8134982	8501159	0.675897	-0.696717	-1.03121	LOC_Os03g15140	1
CS-PBP-jap-Nip-F1	D	Chr3_8448510	3	8134982	8501159	0.675897	-0.696717	-1.03121	LOC_Os03g15390
CS-PBP-jap-Nip-F1	D	Chr3_8448510	3	8134982	8501159	0.675897	-0.696717	-1.03121	LOC_Os03g15200
CS-PBP-jap-Nip-F1	D	Chr3_8448510	3	8134982	8501159	0.675897	-0.696717	-1.03121	LOC_Os03g15070
CS-PBP-jap-Nip-F1	D	Chr3_8448510	3	8134982	8501159	0.675897	-0.696717	-1.03121	LOC_Os03g15460
CS-PBP-jap-Nip-F1	D	Chr3_8448510	3	8134982	8501159	0.675897	-0.696717	-1.03121	LOC_Os03g15180	1
CS-PBP-jap-Nip-F1	D	Chr3_8448510	3	8134982	8501159	0.675897	-0.696717	-1.03121	LOC_Os03g15320
CS-PBP-jap-Nip-F1	D	Chr3_8448510	3	8134982	8501159	0.675897	-0.696717	-1.03121	LOC_Os03g15410	1							P1LP
CS-PBP-jap-Nip-F1	D	Chr3_8448510	3	8134982	8501159	0.675897	-0.696717	-1.03121	LOC_Os03g15100					CPOD	NoDiff
CS-PBP-jap-Nip-F1	D	Chr3_8448510	3	8134982	8501159	0.675897	-0.696717	-1.03121	LOC_Os03g15010	1	1						P1BLP
CS-PBP-jap-Nip-F1	D	Chr3_8448510	3	8134982	8501159	0.675897	-0.696717	-1.03121	LOC_Os03g15430	1
CS-PBP-jap-Nip-F1	D	Chr3_8448510	3	8134982	8501159	0.675897	-0.696717	-1.03121	LOC_Os03g15370
CS-PBP-jap-Nip-F1	D	Chr3_8448510	3	8134982	8501159	0.675897	-0.696717	-1.03121	LOC_Os03g15080
CS-PBP-jap-Nip-F1	D	Chr3_878213	3	812528	912672	1.11153	1.34388	1.20862	LOC_Os03g02330
CS-PBP-jap-Nip-F1	D	Chr3_878213	3	812528	912672	1.11153	1.34388	1.20862	LOC_Os03g02400
CS-PBP-jap-Nip-F1	D	Chr3_878213	3	812528	912672	1.11153	1.34388	1.20862	LOC_Os03g02420	1	1						P1OHP
CS-PBP-jap-Nip-F1	D	Chr3_878213	3	812528	912672	1.11153	1.34388	1.20862	LOC_Os03g02390
CS-PBP-jap-Nip-F1	D	Chr3_878213	3	812528	912672	1.11153	1.34388	1.20862	LOC_Os03g02470	1	1
CS-PBP-jap-Nip-F1	D	Chr3_878213	3	812528	912672	1.11153	1.34388	1.20862	LOC_Os03g02340
CS-PBP-jap-Nip-F1	D	Chr3_878213	3	812528	912672	1.11153	1.34388	1.20862	LOC_Os03g02430	1
CS-PBP-jap-Nip-F1	D	Chr3_878213	3	812528	912672	1.11153	1.34388	1.20862	LOC_Os03g02450
CS-PBP-jap-Nip-F1	D	Chr3_878213	3	812528	912672	1.11153	1.34388	1.20862	LOC_Os03g02350	1
CS-PBP-jap-Nip-F1	OD	Chr4_11639237	4	9669617	11666127	0.626121	1.62095	2.63722	LOC_Os04g20749	1				P2PD	NoDiff	NoDiff	P2LP
CS-PBP-jap-Nip-F1	OD	Chr4_11639237	4	9669617	11666127	0.626121	1.62095	2.63722	LOC_Os04g20390
CS-PBP-jap-Nip-F1	OD	Chr4_11639237	4	9669617	11666127	0.626121	1.62095	2.63722	LOC_Os04g20500
CS-PBP-jap-Nip-F1	OD	Chr4_11639237	4	9669617	11666127	0.626121	1.62095	2.63722	LOC_Os04g19580
CS-PBP-jap-Nip-F1	OD	Chr4_11639237	4	9669617	11666127	0.626121	1.62095	2.63722	LOC_Os04g18740
CS-PBP-jap-Nip-F1	OD	Chr4_11639237	4	9669617	11666127	0.626121	1.62095	2.63722	LOC_Os04g19100
CS-PBP-jap-Nip-F1	OD	Chr4_11639237	4	9669617	11666127	0.626121	1.62095	2.63722	LOC_Os04g17830
CS-PBP-jap-Nip-F1	OD	Chr4_11639237	4	9669617	11666127	0.626121	1.62095	2.63722	LOC_Os04g20630
CS-PBP-jap-Nip-F1	OD	Chr4_11639237	4	9669617	11666127	0.626121	1.62095	2.63722	LOC_Os04g20550
CS-PBP-jap-Nip-F1	OD	Chr4_11639237	4	9669617	11666127	0.626121	1.62095	2.63722	LOC_Os04g20640	1
CS-PBP-jap-Nip-F1	OD	Chr4_11639237	4	9669617	11666127	0.626121	1.62095	2.63722	LOC_Os04g20740					P2ND	NoDiff	NoDiff
CS-PBP-jap-Nip-F1	OD	Chr4_11639237	4	9669617	11666127	0.626121	1.62095	2.63722	LOC_Os04g18700
CS-PBP-jap-Nip-F1	OD	Chr4_11639237	4	9669617	11666127	0.626121	1.62095	2.63722	LOC_Os04g17720
CS-PBP-jap-Nip-F1	OD	Chr4_11639237	4	9669617	11666127	0.626121	1.62095	2.63722	LOC_Os04g20270	1	1						P2BLP
CS-PBP-jap-Nip-F1	OD	Chr4_11639237	4	9669617	11666127	0.626121	1.62095	2.63722	LOC_Os04g20120
CS-PBP-jap-Nip-F1	OD	Chr4_11639237	4	9669617	11666127	0.626121	1.62095	2.63722	LOC_Os04g20774
CS-PBP-jap-Nip-F1	OD	Chr4_11639237	4	9669617	11666127	0.626121	1.62095	2.63722	LOC_Os04g20690
CS-PBP-jap-Nip-F1	OD	Chr4_11639237	4	9669617	11666127	0.626121	1.62095	2.63722	LOC_Os04g20420
CS-PBP-jap-Nip-F1	OD	Chr4_11639237	4	9669617	11666127	0.626121	1.62095	2.63722	LOC_Os04g20330	1	1			P2MP	P2NPD	P2MP	P2OHP
CS-PBP-jap-Nip-F1	OD	Chr4_11639237	4	9669617	11666127	0.626121	1.62095	2.63722	LOC_Os04g20790	1
CS-PBP-jap-Nip-F1	OD	Chr4_11639237	4	9669617	11666127	0.626121	1.62095	2.63722	LOC_Os04g20360
CS-PBP-jap-Nip-F1	OD	Chr4_11639237	4	9669617	11666127	0.626121	1.62095	2.63722	LOC_Os04g19970					P1ND	P1PD	NoDiff
CS-PBP-jap-Nip-F1	OD	Chr4_11639237	4	9669617	11666127	0.626121	1.62095	2.63722	LOC_Os04g20424	1	1						P1LP
CS-PBP-jap-Nip-F1	OD	Chr4_11639237	4	9669617	11666127	0.626121	1.62095	2.63722	LOC_Os04g20320					NoDiff	CPOD	NoDiff
CS-PBP-jap-Nip-F1	OD	Chr4_11639237	4	9669617	11666127	0.626121	1.62095	2.63722	LOC_Os04g20520
CS-PBP-jap-Nip-F1	OD	Chr4_11639237	4	9669617	11666127	0.626121	1.62095	2.63722	LOC_Os04g20700
CS-PBP-jap-Nip-F1	OD	Chr4_11639237	4	9669617	11666127	0.626121	1.62095	2.63722	LOC_Os04g20110					P1POD		P2POD
CS-PBP-jap-Nip-F1	OD	Chr4_11639237	4	9669617	11666127	0.626121	1.62095	2.63722	LOC_Os04g20430
CS-PBP-jap-Nip-F1	OD	Chr4_11639237	4	9669617	11666127	0.626121	1.62095	2.63722	LOC_Os04g20720					NoDiff	NoDiff	P2ND
CS-PBP-jap-Nip-F1	OD	Chr4_11639237	4	9669617	11666127	0.626121	1.62095	2.63722	LOC_Os04g20510
CS-PBP-jap-Nip-F1	OD	Chr4_31642785	4	31557182	31692795	0.490196	-2.91136	-15.3629	LOC_Os04g52970	1							P1LP
CS-PBP-jap-Nip-F1	OD	Chr4_31642785	4	31557182	31692795	0.490196	-2.91136	-15.3629	LOC_Os04g53170	1	1				P1PD
CS-PBP-jap-Nip-F1	OD	Chr4_31642785	4	31557182	31692795	0.490196	-2.91136	-15.3629	LOC_Os04g53195
CS-PBP-jap-Nip-F1	OD	Chr4_31642785	4	31557182	31692795	0.490196	-2.91136	-15.3629	LOC_Os04g53120
CS-PBP-jap-Nip-F1	OD	Chr4_31642785	4	31557182	31692795	0.490196	-2.91136	-15.3629	LOC_Os04g53190	1
CS-PBP-jap-Nip-F1	OD	Chr4_31642785	4	31557182	31692795	0.490196	-2.91136	-15.3629	LOC_Os04g53200	1							P2HP
CS-PBP-jap-Nip-F1	OD	Chr4_31642785	4	31557182	31692795	0.490196	-2.91136	-15.3629	LOC_Os04g53160	1
CS-PBP-jap-Nip-F1	OD	Chr4_31642785	4	31557182	31692795	0.490196	-2.91136	-15.3629	LOC_Os04g53214	1
CS-PBP-jap-Nip-F1	OD	Chr4_31642785	4	31557182	31692795	0.490196	-2.91136	-15.3629	LOC_Os04g53050	1						P1PD	P1LP
CS-PBP-jap-Nip-F1	OD	Chr4_31642785	4	31557182	31692795	0.490196	-2.91136	-15.3629	LOC_Os04g53180
CS-PBP-jap-Nip-F1	OD	Chr4_31642785	4	31557182	31692795	0.490196	-2.91136	-15.3629	LOC_Os04g53150
CS-PBP-jap-Nip-F1	D	Chr4_31893641	4	31776577	31915066	1.6325	1.57637	0.964163	LOC_Os04g53400
CS-PBP-jap-Nip-F1	D	Chr4_31893641	4	31776577	31915066	1.6325	1.57637	0.964163	LOC_Os04g53520	1					NoDiff	P2MP	P1BLP
CS-PBP-jap-Nip-F1	D	Chr4_31893641	4	31776577	31915066	1.6325	1.57637	0.964163	LOC_Os04g53360	1	1
CS-PBP-jap-Nip-F1	D	Chr4_31893641	4	31776577	31915066	1.6325	1.57637	0.964163	LOC_Os04g53530	1
CS-PBP-jap-Nip-F1	D	Chr4_31893641	4	31776577	31915066	1.6325	1.57637	0.964163	LOC_Os04g53390
CS-PBP-jap-Nip-F1	D	Chr4_31893641	4	31776577	31915066	1.6325	1.57637	0.964163	LOC_Os04g53380	1	1						P1BLP
CS-PBP-jap-Nip-F1	D	Chr4_31893641	4	31776577	31915066	1.6325	1.57637	0.964163	LOC_Os04g53496	1	1
CS-PBP-jap-Nip-F1	D	Chr4_31893641	4	31776577	31915066	1.6325	1.57637	0.964163	LOC_Os04g53540	1	1						P2BLP
CS-PBP-jap-Nip-F1	OD	Chr4_31966920	4	31966920	32038119	1.13369	-2.27884	-1.93399	LOC_Os04g53630	1	1
CS-PBP-jap-Nip-F1	OD	Chr4_31966920	4	31966920	32038119	1.13369	-2.27884	-1.93399	LOC_Os04g53640
CS-PBP-jap-Nip-F1	OD	Chr4_31966920	4	31966920	32038119	1.13369	-2.27884	-1.93399	LOC_Os04g53760	1	1						P1BLP
CS-PBP-jap-Nip-F1	OD	Chr4_31966920	4	31966920	32038119	1.13369	-2.27884	-1.93399	LOC_Os04g53750	1	1						P2LP
CS-PBP-jap-Nip-F1	OD	Chr4_31966920	4	31966920	32038119	1.13369	-2.27884	-1.93399	LOC_Os04g53680	1				P2ND		NoDiff	P1HP
CS-PBP-jap-Nip-F1	OD	Chr4_31966920	4	31966920	32038119	1.13369	-2.27884	-1.93399	LOC_Os04g53740	1							P2BLP
CS-PBP-jap-Nip-F1	OD	Chr4_8913760	4	7178820	8913760	0.811296	1.68072	2.13166	LOC_Os04g16200					NoDiff	NoDiff	P2ND
CS-PBP-jap-Nip-F1	OD	Chr4_8913760	4	7178820	8913760	0.811296	1.68072	2.13166	LOC_Os04g14750	1
CS-PBP-jap-Nip-F1	OD	Chr4_8913760	4	7178820	8913760	0.811296	1.68072	2.13166	LOC_Os04g16190
CS-PBP-jap-Nip-F1	OD	Chr4_8913760	4	7178820	8913760	0.811296	1.68072	2.13166	LOC_Os04g16400
CS-PBP-jap-Nip-F1	OD	Chr4_8913760	4	7178820	8913760	0.811296	1.68072	2.13166	LOC_Os04g13020					CPOD	P1PD
CS-PBP-jap-Nip-F1	OD	Chr4_8913760	4	7178820	8913760	0.811296	1.68072	2.13166	LOC_Os04g14920					CNOD		NoDiff
CS-PBP-jap-Nip-F1	OD	Chr4_8913760	4	7178820	8913760	0.811296	1.68072	2.13166	LOC_Os04g13010
CS-PBP-jap-Nip-F1	OD	Chr4_8913760	4	7178820	8913760	0.811296	1.68072	2.13166	LOC_Os04g15970					NoDiff	CPOD	NoDiff
CS-PBP-jap-Nip-F1	OD	Chr4_8913760	4	7178820	8913760	0.811296	1.68072	2.13166	LOC_Os04g14654	1	1
CS-PBP-jap-Nip-F1	OD	Chr4_8913760	4	7178820	8913760	0.811296	1.68072	2.13166	LOC_Os04g14560	1
CS-PBP-jap-Nip-F1	OD	Chr4_8913760	4	7178820	8913760	0.811296	1.68072	2.13166	LOC_Os04g14770					NoDiff	CPOD	NoDiff
CS-PBP-jap-Nip-F1	OD	Chr4_8913760	4	7178820	8913760	0.811296	1.68072	2.13166	LOC_Os04g14500
CS-PBP-jap-Nip-F1	OD	Chr6_15096229	6	13550487	15541603	0.105521	0.284285	7.04271	LOC_Os06g23980
CS-PBP-jap-Nip-F1	OD	Chr6_15096229	6	13550487	15541603	0.105521	0.284285	7.04271	LOC_Os06g25150
CS-PBP-jap-Nip-F1	OD	Chr6_15096229	6	13550487	15541603	0.105521	0.284285	7.04271	LOC_Os06g24030					NoDiff	NoDiff	CPOD
CS-PBP-jap-Nip-F1	OD	Chr6_15096229	6	13550487	15541603	0.105521	0.284285	7.04271	LOC_Os06g25050
CS-PBP-jap-Nip-F1	OD	Chr6_15096229	6	13550487	15541603	0.105521	0.284285	7.04271	LOC_Os06g25290
[truncated: 12,571 more rows]
