# Supplementary material for: Large scale genomic and transcriptomic profiles of rice hybrids revealed a novel universal mechanism underlying yield heterosis
Source: Research Square preprint supplement (doi:10.21203/rs.3.rs-753426/v1), 2021-08-17
Supplement: Supplementary file 19 [file 6a318982da7e7a17891e27b9.xlsx]

## Sheet: Sheet1
Supplementary Table 8 Summary of the QTLs shared among those identified using middle parent heterosis values, F1 phenotypes and parent phenotypes
Trait	Combination	Changsha				Sanya
		F1&Hmpα	F1&Pβ	Hmp&Pγ		F1&Hmp	F1&P	Hmp&P
SBP	J×Nip	0.325581	0.0900901	0.28866		0.207792	0.387387	0.232558
	J×9311	0.244444	0	0		0	0.445652	0.0238095
	I×Nip	0.348485	0.19469	0.12381		0.2	0.0769231	0.21
	I×9311	0.224138	0.100917	0.0594059		0.04	0.171053	0.047619
PBP	J×Nip	0.414634	0.247706	0.0608696		0.34375	0.1	0.388889
	J×9311	0.0512821	0	0.043956		0	0.0821918	0.084507
	I×nip	0.253731	0.129496	0.0344828		0.382353	0.110345	0.20155
	I×9311	0.045045	0.113208	0.1		0.0434783	0.1	0.0186916
SPP	J×Nip	0.495146	0.0673077	0.0412371		0.273973	0.158879	0.02
	J×9311	0.212766	0.0487805	0.0547945		0.0384615	0.191489	0
	I×Nip	0.383562	0.211765	0.179487		0.25	0.0194175	0.315789
	I×9311	0.147727	0.0425532	0.0238095		0.0666667	0.112676	0
KGW	J×Nip	0.305085	0.304348	0.14433		0.427083	0.298077	0.142857
	J×9311	0.0363636	0.133929	0.0273973		0.8	0.1	0.140845
	I×Nip	0.342105	0.175	0.0535714		0.482353	0.153005	0.185185
	I×9311	0.173333	0	0.0227273		0.0645161	0.03125	0.0735294
PNP	J×Nip	0.275862	0.0675676	0.131313		0.701754	0.0747664	0.0549451
	J×9311	0.0454545	0	0.0243902		0.555556	0.0357143	0.0727273
	I×Nip	0.303797	0.0727273	0.0722892		0.803191	0.165644	0.148571
	I×9311	0.150943	0.0449438	0.025641		0.139241	0.12963	0.0909091
GWP	J×Nip	0	0	0		0	0.242424	0
	I×9311	0	0.0666667	0		0	0.105263	0
Average	J×Nip	0.302718	0.129503	0.111068		0.325725	0.210256	0.139875
	J×9311	0.118062	0.0365418	0.0301076		0.278803	0.17101	0.0643778
	I×Nip	0.326336	0.156736	0.092728		0.423579	0.105067	0.212219
	I×9311	0.123531	0.0613814	0.0385973		0.0589836	0.108312	0.0384582
α denote the common QTLs identified between F1 and heterosis
β denote the common QTLs identified between F1 and heterosis.
γ denote the common QTLs identified between Heterosis and parent.
