# Supplementary material for: Large scale genomic and transcriptomic profiles of rice hybrids revealed a novel universal mechanism underlying yield heterosis
Source: Research Square preprint supplement (doi:10.21203/rs.3.rs-753426/v1), 2021-08-17
Supplement: Supplementary file 20 [file c1e9994d521f96955e4d59d2.xlsx]

## Sheet: Sheet1
Supplementary Table 12 The candidate genes within P_QTLs, F1_QTLs and Hmp_QTLs of GWP, PNP and KGW
Trait	Type	QTLtag	Chr	start	stop	Additive	Dominance	d/a	Candidate Gene	Cloned genes related to yield	Function annotation
CS-GWP-ind-9311-F1	OD	Chr5_2574435	5	2574435	2608820	0.276907	19.5276	100.835	LOC_Os05g05250		retrotransposon protein, putative, Ty1-copia subclass, expressed
CS-GWP-ind-9311-F1	OD	Chr1_18832532	1	18683415	19067952	1.80545	-14.1867	-40.1191	LOC_Os01g34000		conserved hypothetical protein
CS-GWP-ind-9311-F1	OD	Chr1_18832532	1	18683415	19067952	1.80545	-14.1867	-40.1191	LOC_Os01g34310		retrotransposon protein, putative, unclassified, expressed
CS-GWP-ind-9311-F1	OD	Chr4_1363796	4	1353796	1393796	2.22506	23.0606	10.3641	LOC_Os04g03210		receptor kinase, putative, expressed
CS-GWP-ind-9311-F1	OD	Chr2_22701023	2	22501023	22836338	2.7453	20.2777	7.47056	LOC_Os02g37834		expressed protein
CS-GWP-ind-9311-F1	OD	Chr1_18832532	1	18683415	19067952	1.80545	-14.1867	-40.1191	LOC_Os01g33960		transposon protein, putative, CACTA, En/Spm sub-class, expressed
CS-GWP-ind-9311-F1	OD	Chr9_10335108	9	10285922	10351988	0.423862	11.8625	87.0204	LOC_Os09g16850		A3-BTB1 - Bric-a-Brac, Tramtrack, Broad Complex BTB domain with A3 subfamily conserved sequence, expressed
CS-GWP-ind-9311-F1	OD	Chr1_19067994	1	19067952	19348747	1.71802	-17.1156	-10.3596	LOC_Os01g34590		expressed protein
CS-GWP-ind-9311-F1	OD	Chr1_19067994	1	19067952	19348747	1.71802	-17.1156	-10.3596	LOC_Os01g34830		expressed protein
CS-GWP-ind-9311-F1	OD	Chr5_2574435	5	2574435	2608820	0.276907	19.5276	100.835	LOC_Os05g05300		CRS1/YhbY domain containing protein, putative, expressed
CS-GWP-ind-9311-F1	OD	Chr9_10335108	9	10285922	10351988	0.423862	11.8625	87.0204	LOC_Os09g16860		retrotransposon protein, putative, unclassified, expressed
CS-GWP-ind-9311-F1	OD	Chr11_655828	11	655247	667702	1.96758	24.2664	13.8449	LOC_Os11g02305		expressed protein
CS-GWP-ind-9311-F1	OD	Chr9_10335108	9	10285922	10351988	0.423862	11.8625	87.0204	LOC_Os09g16870		A3-BTB2 - Bric-a-Brac, Tramtrack, Broad Complex BTB domain with A3 subfamily conserved sequence, expressed
CS-GWP-ind-9311-F1	OD	Chr4_13478699	4	13478699	13478699	2.22612	22.4669	10.0924	LOC_Os04g23570		transposon protein, putative, CACTA, En/Spm sub-class, expressed
CS-GWP-ind-9311-F1	OD	Chr11_655828	11	655247	667702	1.96758	24.2664	13.8449	LOC_Os11g02300		CPuORF36 - conserved peptide uORF-containing transcript, expressed
CS-GWP-ind-9311-F1	OD	Chr12_3382066	12	3352066	3405822	2.63973	-19.319	-9.37068	LOC_Os12g06960		transposon protein, putative, unclassified, expressed
CS-GWP-ind-9311-F1	OD	Chr1_18832532	1	18683415	19067952	1.80545	-14.1867	-40.1191	LOC_Os01g34190		G-patch domain containing protein, expressed
CS-GWP-ind-9311-F1	OD	Chr2_4274797	2	4254797	4294797	2.00496	-13.5062	-6.73639	LOC_Os02g08090		LSM domain containing protein, expressed
CS-GWP-ind-9311-F1	OD	Chr9_10335108	9	10285922	10351988	0.423862	11.8625	87.0204	LOC_Os09g16910		cysteine desulfurase 1, mitochondrial precursor, putative, expressed
CS-GWP-ind-9311-F1	OD	Chr9_10335108	9	10285922	10351988	0.423862	11.8625	87.0204	LOC_Os09g16880		transposon protein, putative, CACTA, En/Spm sub-class, expressed
CS-GWP-ind-9311-F1	OD	Chr11_655828	11	655247	667702	1.96758	24.2664	13.8449	LOC_Os11g02320		nucleotidyltransferase, putative, expressed
CS-GWP-ind-9311-HV	OD	Chr8_28083045	8	28078804	28104255	2.09159	-20.1778	-9.8478	LOC_Os08g44720		retrotransposon protein, putative, unclassified, expressed
CS-GWP-ind-9311-HV	OD	Chr8_28083045	8	28078804	28104255	2.09159	-20.1778	-9.8478	LOC_Os08g44670		calreticulin precursor, putative, expressed
CS-GWP-ind-9311-HV	OD	Chr12_5174458	12	5174458	7570682	0.648029	-19.9656	-42.8007	LOC_Os12g09770		O-methyltransferase, putative, expressed
CS-GWP-ind-9311-HV	OD	Chr2_22846959	2	22684860	22857560	2.28504	18.1079	8.03118	LOC_Os02g37590		glycerophosphoryl diester phosphodiesterase family protein, putative, expressed
CS-GWP-ind-9311-HV	OD	Chr8_28083045	8	28078804	28104255	2.09159	-20.1778	-9.8478	LOC_Os08g44690		transposon protein, putative, Pong sub-class, expressed
CS-GWP-ind-9311-HV	OD	Chr2_22846959	2	22684860	22857560	2.28504	18.1079	8.03118	LOC_Os02g37610		expressed protein
CS-GWP-ind-9311-HV	OD	Chr1_19245802	1	19045802	19345802	2.48977	-21.836	-8.7703	LOC_Os01g34860		expressed protein
CS-GWP-ind-9311-HV	OD	Chr2_22846959	2	22684860	22857560	2.28504	18.1079	8.03118	LOC_Os02g37630		transposon protein, putative, CACTA, En/Spm sub-class, expressed
CS-GWP-ind-9311-HV	OD	Chr8_28083045	8	28078804	28104255	2.09159	-20.1778	-9.8478	LOC_Os08g44680		photosystem I reaction center subunit II, chloroplast precursor, putative, expressed
CS-GWP-ind-9311-HV	OD	Chr8_28083045	8	28078804	28104255	2.09159	-20.1778	-9.8478	LOC_Os08g44650		expressed protein
CS-GWP-ind-9311-HV	OD	Chr2_22846959	2	22684860	22857560	2.28504	18.1079	8.03118	LOC_Os02g37840		retrotransposon protein, putative, unclassified, expressed
CS-GWP-ind-9311-HV	OD	Chr1_24454148	1	24454148	24462150	3.11365	7.53624	2.54601	LOC_Os01g42960		TTL1, putative, expressed
CS-GWP-ind-9311-HV	OD	Chr12_14421704	12	14418719	14421723	1.2762	22.2506	27.4855	LOC_Os12g25110		expressed protein
CS-GWP-ind-9311-HV	OD	Chr2_22846959	2	22684860	22857560	2.28504	18.1079	8.03118	LOC_Os02g37834		expressed protein
CS-GWP-ind-9311-HV	OD	Chr8_28083045	8	28078804	28104255	2.09159	-20.1778	-9.8478	LOC_Os08g44660		EF hand family protein, putative, expressed
CS-GWP-ind-9311-HV	OD	Chr10_11147115	10	11147115	11247115	3.81161	20.0482	5.26782	LOC_Os10g21720		expressed protein
CS-GWP-ind-9311-P	A	Chr1_39046594	1	39043338	39072893	4.18185	-1.37275	-0.338426	LOC_Os01g67314		expressed protein
CS-GWP-ind-9311-P	OD	Chr10_20144213	10	20140031	20157935	2.86944	10.6211	3.73186	LOC_Os10g37630		UBX domain-containing protein, putative, expressed
CS-GWP-ind-9311-P	D	Chr5_16547743	5	16527135	16615577	5.52025	7.59758	1.29968	LOC_Os05g28240		retrotransposon protein, putative, unclassified
CS-GWP-ind-9311-P	OD	Chr6_1987776	6	1972929	1998689	4.07748	14.7247	3.65491	LOC_Os06g04580		transcription factor TFIIF, putative, expressed
CS-GWP-ind-9311-P	OD	Chr8_9375710	8	9343902	9384413	3.90019	-8.76599	-2.27436	LOC_Os08g15350		retrotransposon protein, putative, unclassified, expressed
CS-GWP-ind-9311-P	OD	Chr1_21823049	1	21823049	23550755	4.07202	8.66152	2.15604	LOC_Os01g41600		Sad1 / UNC-like C-terminal domain containing protein, putative, expressed
CS-GWP-ind-9311-P	OD	Chr6_25215628	6	25196700	25218986	3.17528	13.3544	4.08819	LOC_Os06g41990		M16 domain containing zinc peptidase, putative, expressed
CS-GWP-ind-9311-P	OD	Chr10_20144213	10	20140031	20157935	2.86944	10.6211	3.73186	LOC_Os10g37650		impaired sucrose induction 1, putative, expressed
CS-GWP-ind-9311-P	OD	Chr3_3200818	3	3200818	3262046	4.02929	15.0395	3.81322	LOC_Os03g06410		protein kinase domain containing protein, expressed
CS-GWP-ind-9311-P	D	Chr4_32940893	4	32213053	32979048	5.93056	-7.43952	-1.28747	LOC_Os04g55390		plant protein of unknown function domain containing protein, expressed
CS-GWP-ind-9311-P	D	Chr4_32940893	4	32213053	32979048	5.93056	-7.43952	-1.28747	LOC_Os04g54060		transposon protein, putative, unclassified, expressed
CS-GWP-ind-9311-P	D	Chr8_19440872	8	19440872	19552073	4.16755	-5.49249	-1.32237	LOC_Os08g31560		WD-40 repeat family protein, putative, expressed
CS-GWP-ind-9311-P	A	Chr1_39046594	1	39043338	39072893	4.18185	-1.37275	-0.338426	LOC_Os01g67260		expressed protein
CS-GWP-ind-9311-P	OD	Chr6_1987776	6	1972929	1998689	4.07748	14.7247	3.65491	LOC_Os06g04570		expressed protein
CS-GWP-ind-9311-P	D	Chr1_6379372	1	6331776	6520873	5.28171	4.16942	0.867465	LOC_Os01g11960		histone-lysine N-methyltransferase ATX5, putative, expressed
CS-GWP-ind-9311-P	OD	Chr6_25119952	6	25077536	25133014	2.90037	9.19756	3.18673	LOC_Os06g41880		OsSub51 - Putative Subtilisin homologue, expressed
CS-GWP-ind-9311-P	D	Chr4_32940893	4	32213053	32979048	5.93056	-7.43952	-1.28747	LOC_Os04g55450		transposon protein, putative, unclassified, expressed
CS-GWP-ind-9311-P	OD	Chr2_25335265	2	25335265	25935265	3.28131	9.6665	2.94592	LOC_Os02g42134		ARF GTPase-activating domain-containing protein, putative, expressed
CS-GWP-ind-9311-P	OD	Chr1_21823049	1	21823049	23550755	4.07202	8.66152	2.15604	LOC_Os01g41590		transposon protein, putative, unclassified, expressed
CS-GWP-ind-9311-P	OD	Chr6_25119952	6	25077536	25133014	2.90037	9.19756	3.18673	LOC_Os06g41900		transposon protein, putative, unclassified, expressed
CS-GWP-ind-9311-P	D	Chr3_27212360	3	27174347	27630496	4.77255	-4.61346	-1.014	LOC_Os03g47940		GDSL-like lipase/acylhydrolase, putative, expressed
CS-GWP-ind-9311-P	OD	Chr10_20144213	10	20140031	20157935	2.86944	10.6211	3.73186	LOC_Os10g37660		trehalase precursor, putative, expressed
CS-GWP-ind-9311-P	OD	Chr6_25119952	6	25077536	25133014	2.90037	9.19756	3.18673	LOC_Os06g41840		reductase, putative, expressed
CS-GWP-ind-9311-P	D	Chr5_16547743	5	16527135	16615577	5.52025	7.59758	1.29968	LOC_Os05g28360		expressed protein
CS-GWP-ind-9311-P	A	Chr1_39046594	1	39043338	39072893	4.18185	-1.37275	-0.338426	LOC_Os01g67310		patatin, putative, expressed
CS-GWP-ind-9311-P	OD	Chr10_20144213	10	20140031	20157935	2.86944	10.6211	3.73186	LOC_Os10g37640		HIT zinc finger domain containing protein, expressed
CS-GWP-ind-9311-P	D	Chr1_6379372	1	6331776	6520873	5.28171	4.16942	0.867465	LOC_Os01g11760		GDSL-like lipase/acylhydrolase, putative, expressed
CS-GWP-ind-9311-P	D	Chr3_9580555	3	9570555	9980555	5.19053	6.30731	1.02102	LOC_Os03g17720		expressed protein
CS-GWP-ind-9311-P	OD	Chr1_21823049	1	21823049	23550755	4.07202	8.66152	2.15604	LOC_Os01g38890		expressed protein
CS-GWP-ind-9311-P	A	Chr1_39046594	1	39043338	39072893	4.18185	-1.37275	-0.338426	LOC_Os01g67300		expressed protein
CS-GWP-ind-9311-P	D	Chr4_32940893	4	32213053	32979048	5.93056	-7.43952	-1.28747	LOC_Os04g55370		plant protein of unknown function domain containing protein, expressed
CS-GWP-ind-9311-P	D	Chr5_16547743	5	16527135	16615577	5.52025	7.59758	1.29968	LOC_Os05g28220		retrotransposon protein, putative, unclassified, expressed
CS-GWP-ind-9311-P	D	Chr3_27212360	3	27174347	27630496	4.77255	-4.61346	-1.014	LOC_Os03g47870		retrotransposon protein, putative, unclassified, expressed
CS-GWP-ind-9311-P	D	Chr3_27212360	3	27174347	27630496	4.77255	-4.61346	-1.014	LOC_Os03g47830		argonaute, putative, expressed
CS-GWP-ind-9311-P	D	Chr1_6379372	1	6331776	6520873	5.28171	4.16942	0.867465	LOC_Os01g11720		transposable element protein, putative, containing Pfam profile: PF03004, Transposase_24, expressed
CS-GWP-ind-9311-P	OD	Chr8_9375710	8	9343902	9384413	3.90019	-8.76599	-2.27436	LOC_Os08g15420		CSLC3 - cellulose synthase-like family C, expressed
CS-GWP-ind-9311-P	OD	Chr6_25215628	6	25196700	25218986	3.17528	13.3544	4.08819	LOC_Os06g41980		LYK8, putative, expressed
CS-GWP-ind-9311-P	OD	Chr8_9375710	8	9343902	9384413	3.90019	-8.76599	-2.27436	LOC_Os08g15340		expressed protein
CS-GWP-ind-9311-P	D	Chr3_27212360	3	27174347	27630496	4.77255	-4.61346	-1.014	LOC_Os03g47920		expressed protein
CS-GWP-ind-9311-P	D	Chr1_6379372	1	6331776	6520873	5.28171	4.16942	0.867465	LOC_Os01g11790		GDSL-like lipase/acylhydrolase, putative, expressed
CS-GWP-ind-9311-P	OD	Chr5_8670631	5	8345202	8749632	3.66834	12.1669	3.36406	LOC_Os05g15180		expressed protein
CS-GWP-ind-9311-P	D	Chr3_9580555	3	9570555	9980555	5.19053	6.30731	1.02102	LOC_Os03g17860		OsPDIL5-1 protein disulfide isomerase PDIL5-1, expressed
CS-GWP-ind-9311-P	A	Chr1_39046594	1	39043338	39072893	4.18185	-1.37275	-0.338426	LOC_Os01g67280		expressed protein
CS-GWP-ind-9311-P	D	Chr3_27212360	3	27174347	27630496	4.77255	-4.61346	-1.014	LOC_Os03g47860		transferase family protein, putative, expressed
CS-GWP-ind-9311-P	D	Chr5_16547743	5	16527135	16615577	5.52025	7.59758	1.29968	LOC_Os05g28250		retrotransposon, putative, centromere-specific
CS-GWP-ind-9311-P	OD	Chr5_8670631	5	8345202	8749632	3.66834	12.1669	3.36406	LOC_Os05g15290		retrotransposon protein, putative, Ty3-gypsy subclass, expressed
CS-GWP-ind-9311-P	D	Chr4_32940893	4	32213053	32979048	5.93056	-7.43952	-1.28747	LOC_Os04g54050		retrotransposon protein, putative, unclassified
CS-GWP-ind-9311-P	OD	Chr5_8670631	5	8345202	8749632	3.66834	12.1669	3.36406	LOC_Os05g15190		retrotransposon protein, putative, unclassified
CS-GWP-ind-9311-P	OD	Chr6_1987776	6	1972929	1998689	4.07748	14.7247	3.65491	LOC_Os06g04590		OsSAUR24 - Auxin-responsive SAUR gene family member, expressed
CS-GWP-ind-9311-P	OD	Chr3_3200818	3	3200818	3262046	4.02929	15.0395	3.81322	LOC_Os03g06440		RNA helicase SDE3, putative, expressed
CS-GWP-ind-9311-P	D	Chr2_20117125	2	20065562	20143950	4.23527	4.59816	1.0808	LOC_Os02g33720		RING-H2 finger protein, putative, expressed
CS-GWP-ind-9311-P	A	Chr11_26431863	11	26392754	26432029	4.68194	-0.31493	-0.00937529	LOC_Os11g43760		lipase class 3 family protein, putative, expressed
CS-GWP-ind-9311-P	D	Chr3_27212360	3	27174347	27630496	4.77255	-4.61346	-1.014	LOC_Os03g47949		HECT-domain domain containing protein, expressed
CS-GWP-ind-9311-P	A	Chr1_39046594	1	39043338	39072893	4.18185	-1.37275	-0.338426	LOC_Os01g67270		expressed protein
CS-GWP-ind-9311-P	OD	Chr6_25119952	6	25077536	25133014	2.90037	9.19756	3.18673	LOC_Os06g41830		SMP-30/Gluconolaconase/LRE-like region containing protein, expressed
CS-GWP-ind-9311-P	OD	Chr6_25119952	6	25077536	25133014	2.90037	9.19756	3.18673	LOC_Os06g41820		SMP-30/Gluconolaconase/LRE-like region containing protein, expressed
CS-GWP-ind-9311-P	OD	Chr8_9375710	8	9343902	9384413	3.90019	-8.76599	-2.27436	LOC_Os08g15410		expressed protein
CS-GWP-ind-9311-P	OD	Chr8_9375710	8	9343902	9384413	3.90019	-8.76599	-2.27436	LOC_Os08g15400		retrotransposon protein, putative, unclassified, expressed
CS-GWP-ind-9311-P	OD	Chr6_25215628	6	25196700	25218986	3.17528	13.3544	4.08819	LOC_Os06g42000		peroxiredoxin, putative, expressed
CS-GWP-ind-9311-P	OD	Chr6_25119952	6	25077536	25133014	2.90037	9.19756	3.18673	LOC_Os06g41810		reductase, putative, expressed
CS-GWP-ind-9311-P	OD	Chr6_1987776	6	1972929	1998689	4.07748	14.7247	3.65491	LOC_Os06g04560		kinesin motor domain containing protein, expressed
CS-GWP-ind-9311-P	OD	Chr6_25119952	6	25077536	25133014	2.90037	9.19756	3.18673	LOC_Os06g41850	TGW6	SMP-30/Gluconolaconase/LRE-like region containing protein, expressed
CS-GWP-ind-9311-P	A	Chr1_39046594	1	39043338	39072893	4.18185	-1.37275	-0.338426	LOC_Os01g67290		cyclin-related protein, putative, expressed
CS-GWP-jap-Nip-F1	OD	Chr1_42982677	1	42964264	43163408	5.3018	-9.13258	-1.69641	LOC_Os01g74160		carboxyl-terminal peptidase, putative, expressed
CS-GWP-jap-Nip-F1	OD	Chr1_23188850	1	23088850	23266228	3.19217	-10.044	-3.18365	LOC_Os01g40990		expressed protein
CS-GWP-jap-Nip-F1	OD	Chr9_3559348	9	3459348	3569348	2.0942	22.6413	10.8114	LOC_Os09g07260		retrotransposon protein, putative, Ty3-gypsy subclass
CS-GWP-jap-Nip-F1	OD	Chr1_42982677	1	42964264	43163408	5.3018	-9.13258	-1.69641	LOC_Os01g74200		protein kinase domain containing protein, expressed
CS-GWP-jap-Nip-F1	OD	Chr4_12697834	4	12697834	13017699	1.76475	-17.6513	-10.2808	LOC_Os04g22930		transposon protein, putative, CACTA, En/Spm sub-class, expressed
CS-GWP-jap-Nip-F1	OD	Chr1_23188850	1	23088850	23266228	3.19217	-10.044	-3.18365	LOC_Os01g41080		retrotransposon protein, putative, unclassified, expressed
CS-GWP-jap-Nip-F1	OD	Chr8_10303029	8	10203029	10603029	2.4166	12.2978	5.10395	LOC_Os08g17010		retrotransposon protein, putative, unclassified, expressed
CS-GWP-jap-Nip-F1	OD	Chr1_23188850	1	23088850	23266228	3.19217	-10.044	-3.18365	LOC_Os01g40980		helicase, putative, expressed
CS-GWP-jap-Nip-F1	OD	Chr8_10303029	8	10203029	10603029	2.4166	12.2978	5.10395	LOC_Os08g16914		expressed protein
CS-GWP-jap-Nip-F1	OD	Chr1_42982677	1	42964264	43163408	5.3018	-9.13258	-1.69641	LOC_Os01g74520		methyltransferase domain containing protein, putative, expressed
CS-GWP-jap-Nip-F1	OD	Chr9_3559348	9	3459348	3569348	2.0942	22.6413	10.8114	LOC_Os09g07250		retrotransposon protein, putative, unclassified, expressed
CS-GWP-jap-Nip-F1	OD	Chr11_7766036	11	7729838	7835075	0.479889	23.9654	51.8999	LOC_Os11g14070		expressed protein
CS-GWP-jap-Nip-F1	OD	Chr11_7766036	11	7729838	7835075	0.479889	23.9654	51.8999	LOC_Os11g14080		heparan-alpha-glucosaminide N-acetyltransferase, putative, expressed
CS-GWP-jap-Nip-F1	OD	Chr11_7766036	11	7729838	7835075	0.479889	23.9654	51.8999	LOC_Os11g13960		retrotransposon protein, putative, Ty1-copia subclass, expressed
CS-GWP-jap-Nip-F1	OD	Chr4_12697834	4	12697834	13017699	1.76475	-17.6513	-10.2808	LOC_Os04g22860		protein phosphatase 1 regulatory subunit 11, putative, expressed
CS-GWP-jap-Nip-F1	D	Chr6_5888749	6	5888747	6017048	4.04703	-4.55511	-1.12806	LOC_Os06g11308		hypothetical protein
CS-GWP-jap-Nip-F1	OD	Chr1_42982677	1	42964264	43163408	5.3018	-9.13258	-1.69641	LOC_Os01g74430		expressed protein
CS-GWP-jap-Nip-F1	D	Chr3_17900508	3	17900508	18000508	4.25496	-5.20166	-1.22249	LOC_Os03g31430		terpene synthase, N-terminal domain containing protein, expressed
CS-GWP-jap-Nip-F1	OD	Chr4_12697834	4	12697834	13017699	1.76475	-17.6513	-10.2808	LOC_Os04g22430		retrotransposon protein, putative, unclassified, expressed
CS-GWP-jap-Nip-F1	OD	Chr1_13583309	1	13383309	13983309	4.58847	-7.7876	-1.69721	LOC_Os01g24090		TPR repeat, putative, expressed
CS-GWP-jap-Nip-HV	OD	Chr1_39705187	1	39572240	39793835	2.99663	-12.0078	-4.60396	LOC_Os01g68420		OsMADS97 - MADS-box family gene with M-beta type-box, expressed
CS-GWP-jap-Nip-HV	OD	Chr1_39705187	1	39572240	39793835	2.99663	-12.0078	-4.60396	LOC_Os01g68300		expressed protein
CS-GWP-jap-Nip-HV	OD	Chr1_39705187	1	39572240	39793835	2.99663	-12.0078	-4.60396	LOC_Os01g68470		expressed protein
CS-GWP-jap-Nip-HV	OD	Chr1_14172886	1	14072886	14284075	0.761657	-6.25276	-9.27206	LOC_Os01g25290		expressed protein
CS-GWP-jap-Nip-HV	D	Chr5_28198853	5	28098853	28398853	3.44467	1.8278	0.543433	LOC_Os05g49120		NLI interacting factor-like phosphatase, putative, expressed
CS-GWP-jap-Nip-HV	OD	Chr1_39705187	1	39572240	39793835	2.99663	-12.0078	-4.60396	LOC_Os01g68480		thioredoxin, putative, expressed
CS-GWP-jap-Nip-HV	OD	Chr1_31529753	1	31426839	31636469	0.834383	-10.8023	-24.2469	LOC_Os01g54910		GTP-binding protein typA/bipA, putative, expressed
CS-GWP-jap-Nip-HV	OD	Chr8_10675853	8	10478275	10722589	2.46551	11.8378	4.96704	LOC_Os08g17120		transposon protein, putative, CACTA, En/Spm sub-class
CS-GWP-jap-Nip-HV	OD	Chr8_15384656	8	15079840	15565496	1.90474	15.0657	8.43004	LOC_Os08g25020		retrotransposon protein, putative, Ty1-copia subclass
CS-GWP-jap-Nip-HV	OD	Chr8_15384656	8	15079840	15565496	1.90474	15.0657	8.43004	LOC_Os08g25300		expressed protein
CS-GWP-jap-Nip-HV	OD	Chr1_31529753	1	31426839	31636469	0.834383	-10.8023	-24.2469	LOC_Os01g54900		lipid-A-disaccharide synthase family protein, expressed
CS-GWP-jap-Nip-HV	OD	Chr8_9873267	8	8846631	10722589	2.78667	14.2167	5.27835	LOC_Os08g15840		ankyrin repeat-rich protein, putative, expressed
CS-GWP-jap-Nip-HV	OD	Chr1_31529753	1	31426839	31636469	0.834383	-10.8023	-24.2469	LOC_Os01g54850		OsFBX24 - F-box domain containing protein, expressed
CS-GWP-jap-Nip-HV	OD	Chr8_9873267	8	8846631	10722589	2.78667	14.2167	5.27835	LOC_Os08g14720		expressed protein
CS-GWP-jap-Nip-HV	OD	Chr8_9873267	8	8846631	10722589	2.78667	14.2167	5.27835	LOC_Os08g15940		transposon protein, putative, CACTA, En/Spm sub-class, expressed
CS-GWP-jap-Nip-HV	OD	Chr8_10675853	8	10478275	10722589	2.46551	11.8378	4.96704	LOC_Os08g17210		transposon protein, putative, CACTA, En/Spm sub-class
CS-GWP-jap-Nip-HV	OD	Chr8_15384656	8	15079840	15565496	1.90474	15.0657	8.43004	LOC_Os08g25270		expressed protein
CS-GWP-jap-Nip-HV	OD	Chr8_10675853	8	10478275	10722589	2.46551	11.8378	4.96704	LOC_Os08g17420		retrotransposon protein, putative, unclassified, expressed
CS-GWP-jap-Nip-HV	OD	Chr8_9873267	8	8846631	10722589	2.78667	14.2167	5.27835	LOC_Os08g17010		retrotransposon protein, putative, unclassified, expressed
CS-GWP-jap-Nip-HV	OD	Chr8_15384656	8	15079840	15565496	1.90474	15.0657	8.43004	LOC_Os08g25350		transposon protein, putative, unclassified, expressed
CS-GWP-jap-Nip-HV	OD	Chr8_9873267	8	8846631	10722589	2.78667	14.2167	5.27835	LOC_Os08g15950		retrotransposon protein, putative, Ty3-gypsy subclass, expressed
CS-GWP-jap-Nip-HV	D	Chr5_28198853	5	28098853	28398853	3.44467	1.8278	0.543433	LOC_Os05g49160		expressed protein
CS-GWP-jap-Nip-HV	OD	Chr1_31529753	1	31426839	31636469	0.834383	-10.8023	-24.2469	LOC_Os01g54730		expressed protein
CS-GWP-jap-Nip-HV	OD	Chr1_31529753	1	31426839	31636469	0.834383	-10.8023	-24.2469	LOC_Os01g54750		expressed protein
CS-GWP-jap-Nip-HV	OD	Chr1_31529753	1	31426839	31636469	0.834383	-10.8023	-24.2469	LOC_Os01g54760		hypothetical protein
CS-GWP-jap-Nip-HV	OD	Chr1_39705187	1	39572240	39793835	2.99663	-12.0078	-4.60396	LOC_Os01g68330		antigen peptide transporter-like 1, chloroplast precursor, putative, expressed
CS-GWP-jap-Nip-HV	OD	Chr10_16776317	10	16676317	16876317	2.76251	-8.63583	-3.62432	LOC_Os10g31970		SNF2 family N-terminal domain containing protein, expressed
CS-GWP-jap-Nip-HV	OD	Chr1_31529753	1	31426839	31636469	0.834383	-10.8023	-24.2469	LOC_Os01g54820		retrotransposon protein, putative, Ty3-gypsy subclass, expressed
CS-GWP-jap-Nip-HV	OD	Chr8_9873267	8	8846631	10722589	2.78667	14.2167	5.27835	LOC_Os08g16140		transposon protein, putative, CACTA, En/Spm sub-class, expressed
CS-GWP-jap-Nip-HV	OD	Chr8_10675853	8	10478275	10722589	2.46551	11.8378	4.96704	LOC_Os08g17230		transposon protein, putative, CACTA, En/Spm sub-class, expressed
CS-GWP-jap-Nip-HV	OD	Chr1_31529753	1	31426839	31636469	0.834383	-10.8023	-24.2469	LOC_Os01g54810	THIS1	lipase, putative, expressed
CS-GWP-jap-Nip-HV	OD	Chr1_31529753	1	31426839	31636469	0.834383	-10.8023	-24.2469	LOC_Os01g54714		retrotransposon protein, putative, unclassified, expressed
CS-GWP-jap-Nip-HV	OD	Chr8_15384656	8	15079840	15565496	1.90474	15.0657	8.43004	LOC_Os08g25280		pentatricopeptide, putative, expressed
CS-GWP-jap-Nip-HV	OD	Chr8_9873267	8	8846631	10722589	2.78667	14.2167	5.27835	LOC_Os08g16470		expressed protein
CS-GWP-jap-Nip-HV	OD	Chr8_15384656	8	15079840	15565496	1.90474	15.0657	8.43004	LOC_Os08g24980		transposon protein, putative, unclassified, expressed
CS-GWP-jap-Nip-HV	OD	Chr8_9873267	8	8846631	10722589	2.78667	14.2167	5.27835	LOC_Os08g16300		expressed protein
CS-GWP-jap-Nip-HV	OD	Chr5_1514000	5	1514000	1534000	0.0123783	-9.79077	-790.96	LOC_Os05g03574		expressed protein
CS-GWP-jap-Nip-HV	OD	Chr8_10675853	8	10478275	10722589	2.46551	11.8378	4.96704	LOC_Os08g17500		cinnamoyl-CoA reductase, putative, expressed
CS-GWP-jap-Nip-HV	OD	Chr1_39705187	1	39572240	39793835	2.99663	-12.0078	-4.60396	LOC_Os01g68269		expressed protein
CS-GWP-jap-Nip-HV	OD	Chr1_31529753	1	31426839	31636469	0.834383	-10.8023	-24.2469	LOC_Os01g55010		EBNA-1, putative, expressed
CS-GWP-jap-Nip-HV	OD	Chr8_9873267	8	8846631	10722589	2.78667	14.2167	5.27835	LOC_Os08g16110		expressed protein
CS-GWP-jap-Nip-HV	OD	Chr10_16776317	10	16676317	16876317	2.76251	-8.63583	-3.62432	LOC_Os10g31950		3-ketoacyl-CoA thiolase, peroxisomal precursor, putative, expressed
CS-GWP-jap-Nip-HV	OD	Chr8_10675853	8	10478275	10722589	2.46551	11.8378	4.96704	LOC_Os08g17470		retrotransposon protein, putative, unclassified, expressed
CS-GWP-jap-Nip-HV	OD	Chr1_39705187	1	39572240	39793835	2.99663	-12.0078	-4.60396	LOC_Os01g68290		expressed protein
CS-GWP-jap-Nip-HV	OD	Chr8_15384656	8	15079840	15565496	1.90474	15.0657	8.43004	LOC_Os08g24910		expressed protein
CS-GWP-jap-Nip-HV	OD	Chr1_31529753	1	31426839	31636469	0.834383	-10.8023	-24.2469	LOC_Os01g54930		one zinc finger protein, putative, expressed
CS-GWP-jap-Nip-HV	OD	Chr8_15384656	8	15079840	15565496	1.90474	15.0657	8.43004	LOC_Os08g25580		transposon protein, putative, unclassified, expressed
CS-GWP-jap-Nip-HV	OD	Chr1_14172886	1	14072886	14284075	0.761657	-6.25276	-9.27206	LOC_Os01g25110		clathrin adaptor complex small chain domain containing protein, expressed
CS-GWP-jap-Nip-HV	OD	Chr8_9873267	8	8846631	10722589	2.78667	14.2167	5.27835	LOC_Os08g16230		retrotransposon protein, putative, Ty3-gypsy subclass, expressed
CS-GWP-jap-Nip-HV	OD	Chr1_31529753	1	31426839	31636469	0.834383	-10.8023	-24.2469	LOC_Os01g55020		expressed protein
CS-GWP-jap-Nip-HV	OD	Chr1_31529753	1	31426839	31636469	0.834383	-10.8023	-24.2469	LOC_Os01g54870		60S ribosomal protein L18a, putative, expressed
CS-GWP-jap-Nip-HV	OD	Chr1_31529753	1	31426839	31636469	0.834383	-10.8023	-24.2469	LOC_Os01g54830		retrotransposon protein, putative, Ty3-gypsy subclass, expressed
CS-GWP-jap-Nip-HV	OD	Chr1_31529753	1	31426839	31636469	0.834383	-10.8023	-24.2469	LOC_Os01g54620		CESA4 - cellulose synthase, expressed
CS-GWP-jap-Nip-HV	OD	Chr8_15384656	8	15079840	15565496	1.90474	15.0657	8.43004	LOC_Os08g24930		expressed protein
CS-GWP-jap-Nip-HV	OD	Chr8_10675853	8	10478275	10722589	2.46551	11.8378	4.96704	LOC_Os08g17480		retrotransposon protein, putative, Ty3-gypsy subclass, expressed
CS-GWP-jap-Nip-HV	OD	Chr1_31529753	1	31426839	31636469	0.834383	-10.8023	-24.2469	LOC_Os01g54940		dehydrogenase, putative, expressed
CS-GWP-jap-Nip-HV	OD	Chr8_9873267	8	8846631	10722589	2.78667	14.2167	5.27835	LOC_Os08g17100		expressed protein
CS-GWP-jap-Nip-HV	OD	Chr8_9873267	8	8846631	10722589	2.78667	14.2167	5.27835	LOC_Os08g16190		retrotransposon protein, putative, unclassified, expressed
CS-GWP-jap-Nip-HV	OD	Chr8_9873267	8	8846631	10722589	2.78667	14.2167	5.27835	LOC_Os08g16060		hypothetical protein
CS-GWP-jap-Nip-HV	OD	Chr1_31529753	1	31426839	31636469	0.834383	-10.8023	-24.2469	LOC_Os01g54670		coiled-coil domain-containing protein 25, putative, expressed
CS-GWP-jap-Nip-HV	OD	Chr8_15384656	8	15079840	15565496	1.90474	15.0657	8.43004	LOC_Os08g25190		retrotransposon protein, putative, unclassified, expressed
CS-GWP-jap-Nip-HV	D	Chr5_28198853	5	28098853	28398853	3.44467	1.8278	0.543433	LOC_Os05g49164		expressed protein
CS-GWP-jap-Nip-HV	OD	Chr1_31529753	1	31426839	31636469	0.834383	-10.8023	-24.2469	LOC_Os01g54784		expressed protein
CS-GWP-jap-Nip-P	D	Chr8_26935573	8	26934765	26953781	9.3346	-5.6801	-0.583366	LOC_Os08g42610		pentatricopeptide, putative, expressed
CS-GWP-jap-Nip-P	D	Chr8_5066516	8	4863582	5178553	11.5511	-17.1744	-1.43911	LOC_Os08g08830		expressed protein
CS-GWP-jap-Nip-P	A	Chr11_6257512	11	6250512	6277512	2.29983	-1.01706	-0.442234	LOC_Os11g11290		retrotransposon protein, putative, unclassified, expressed
CS-GWP-jap-Nip-P	D	Chr12_9356700	12	9336700	9456700	11.5605	-6.16864	-0.406441	LOC_Os12g16350		enoyl-CoA hydratase/isomerase family protein, putative, expressed
CS-GWP-jap-Nip-P	A	Chr11_14117094	11	14117091	14119719	8.66786	-1.42411	-0.114325	LOC_Os11g24780		expressed protein
CS-GWP-jap-Nip-P	A	Chr7_15243556	7	15043556	15343556	8.59931	-2.56654	-0.298459	LOC_Os07g26260		retrotransposon protein, putative, Ty3-gypsy subclass, expressed
CS-GWP-jap-Nip-P	D	Chr12_20089671	12	20049751	20091600	2.17419	1.41738	0.627774	LOC_Os12g33140		expressed protein
CS-GWP-jap-Nip-P	D	Chr12_20089671	12	20049751	20091600	2.17419	1.41738	0.627774	LOC_Os12g33150		expressed protein
CS-GWP-jap-Nip-P	D	Chr5_23938377	5	23838377	23999317	2.06076	1.42921	0.744329	LOC_Os05g40830		expressed protein
CS-GWP-jap-Nip-P	D	Chr12_20089671	12	20049751	20091600	2.17419	1.41738	0.627774	LOC_Os12g33160		RGH1A, putative, expressed
CS-GWP-jap-Nip-P	D	Chr5_23938377	5	23838377	23999317	2.06076	1.42921	0.744329	LOC_Os05g40810		BRCA1 C Terminus domain containing protein, expressed
CS-GWP-jap-Nip-P	A	Chr7_15243556	7	15043556	15343556	8.59931	-2.56654	-0.298459	LOC_Os07g26490		ankyrin repeat domain containing protein, expressed
CS-GWP-jap-Nip-P	A	Chr7_15243556	7	15043556	15343556	8.59931	-2.56654	-0.298459	LOC_Os07g26180		cysteine-rich receptor-like protein kinase 42 precursor, putative, expressed
CS-GWP-jap-Nip-P	A	Chr1_12520176	1	12520176	12520751	5.31345	-0.909198	-0.257022	LOC_Os01g22270		retrotransposon protein, putative, unclassified, expressed
CS-GWP-jap-Nip-P	D	Chr11_19231567	11	19131567	19431567	1.98669	1.75008	0.880905	LOC_Os11g32590		transposon protein, putative, Mariner sub-class, expressed
CS-GWP-jap-Nip-P	A	Chr7_15243556	7	15043556	15343556	8.59931	-2.56654	-0.298459	LOC_Os07g26480		P21-Rho-binding domain containing protein, putative, expressed
CS-GWP-jap-Nip-P	D	Chr8_26935573	8	26934765	26953781	9.3346	-5.6801	-0.583366	LOC_Os08g42640		zinc finger, C3HC4 type domain containing protein, expressed
CS-GWP-jap-Nip-P	A	Chr4_32627432	4	32427432	32827432	4.87115	-2.43361	-0.681815	LOC_Os04g54850		pectinesterase, putative, expressed
CS-GWP-jap-Nip-P	A	Chr7_15243556	7	15043556	15343556	8.59931	-2.56654	-0.298459	LOC_Os07g26500		hypothetical protein
CS-GWP-jap-Nip-P	A	Chr7_15243556	7	15043556	15343556	8.59931	-2.56654	-0.298459	LOC_Os07g26170		expressed protein
SY-GWP-ind-9311-F1	OD	Chr12_2409986	12	2082451	2521236	1.83482	-12.4756	-10.2555	LOC_Os12g04840		retrotransposon protein, putative, unclassified, expressed
SY-GWP-ind-9311-F1	OD	Chr2_34577542	2	34477542	36577542	0.390314	-6.37582	-16.9416	LOC_Os02g56480		PB1 domain containing protein, expressed
SY-GWP-ind-9311-F1	OD	Chr11_19251037	11	19251014	19664483	0.168903	-6.74399	-65.8685	LOC_Os11g32640		hypothetical protein
SY-GWP-ind-9311-F1	OD	Chr12_2409986	12	2082451	2521236	1.83482	-12.4756	-10.2555	LOC_Os12g05470		plastocyanin-like domain containing protein, putative, expressed
SY-GWP-ind-9311-F1	OD	Chr11_4797413	11	4797413	4797413	0.297095	-8.25969	-27.8016	LOC_Os11g09020		amino acid transporter, putative, expressed
SY-GWP-ind-9311-F1	OD	Chr8_9314051	8	9294051	9384051	0.208469	9.43403	45.2539	LOC_Os08g15320		transposon protein, putative, CACTA, En/Spm sub-class, expressed
SY-GWP-ind-9311-F1	OD	Chr7_15006750	7	14687375	15007316	0.519034	9.7909	63.9578	LOC_Os07g25620		retrotransposon protein, putative, unclassified, expressed
SY-GWP-ind-9311-F1	OD	Chr7_15006750	7	14687375	15007316	0.519034	9.7909	63.9578	LOC_Os07g25630		retrotransposon protein, putative, Ty3-gypsy subclass, expressed
SY-GWP-ind-9311-F1	OD	Chr12_2409986	12	2082451	2521236	1.83482	-12.4756	-10.2555	LOC_Os12g05270		zinc finger, C3HC4 type domain containing protein, expressed
SY-GWP-ind-9311-F1	OD	Chr12_17085859	12	17067455	17364687	0.571424	-12.5528	-197.726	LOC_Os12g28900		retrotransposon protein, putative, unclassified
SY-GWP-ind-9311-F1	OD	Chr11_23285330	11	23285330	23485330	0.882977	7.49577	8.4892	LOC_Os11g39120		expressed protein
SY-GWP-ind-9311-F1	OD	Chr11_19251037	11	19251014	19664483	0.168903	-6.74399	-65.8685	LOC_Os11g32630		expressed protein
SY-GWP-ind-9311-F1	OD	Chr1_14516274	1	14503095	14516696	1.21525	-9.9201	-14.5625	LOC_Os01g25600		tetratricopeptide repeat domain containing protein, expressed
SY-GWP-ind-9311-F1	OD	Chr12_2409986	12	2082451	2521236	1.83482	-12.4756	-10.2555	LOC_Os12g05350		hypothetical protein
SY-GWP-ind-9311-F1	OD	Chr7_15006750	7	14687375	15007316	0.519034	9.7909	63.9578	LOC_Os07g26050		hypothetical protein
SY-GWP-ind-9311-F1	OD	Chr1_14516274	1	14503095	14516696	1.21525	-9.9201	-14.5625	LOC_Os01g25610		40S ribosomal protein S4, putative, expressed
SY-GWP-ind-9311-F1	OD	Chr6_29599150	6	29599150	29600347	0.990663	7.20936	7.26449	LOC_Os06g48880		expressed protein
SY-GWP-ind-9311-F1	OD	Chr7_8061954	7	8061954	8261954	0.228145	-13.2341	-58.0071	LOC_Os07g14130		pectinesterase inhibitor domain containing protein, expressed
SY-GWP-ind-9311-HV	OD	Chr2_19708917	2	19704158	19765916	0.765645	5.25591	8.90705	LOC_Os02g33130		pectinesterase inhibitor domain containing protein, putative, expressed
SY-GWP-ind-9311-HV	OD	Chr2_19708917	2	19704158	19765916	0.765645	5.25591	8.90705	LOC_Os02g33180		rar1, putative, expressed
SY-GWP-ind-9311-HV	D	Chr4_24827955	4	24825105	24858572	0.304377	0.255757	1.60233	LOC_Os04g41910		RNA recognition motif containing protein, putative, expressed
SY-GWP-ind-9311-HV	OD	Chr1_3564292	1	3458050	3590080	0.765654	-5.97976	-8.60045	LOC_Os01g07500		alliin lyase precursor, putative, expressed
SY-GWP-ind-9311-HV	OD	Chr9_8703837	9	8620825	8874117	0.396301	-7.9621	-44.3887	LOC_Os09g14640		expressed protein
SY-GWP-ind-9311-HV	OD	Chr2_19708917	2	19704158	19765916	0.765645	5.25591	8.90705	LOC_Os02g33190		retrotransposon protein, putative, unclassified, expressed
SY-GWP-ind-9311-HV	OD	Chr11_23565382	11	23050175	23979855	0.786504	5.52761	8.70642	LOC_Os11g39550		Leucine Rich Repeat family protein, expressed
SY-GWP-ind-9311-HV	OD	Chr11_16022068	11	15934984	16282930	1.10266	7.24284	8.89973	LOC_Os11g27680		expressed protein
SY-GWP-ind-9311-HV	OD	Chr11_4803736	11	4745027	5672628	0.337176	-6.56934	-35.1843	LOC_Os11g09020		amino acid transporter, putative, expressed
SY-GWP-ind-9311-HV	OD	Chr5_4052804	5	4052804	4553089	1.06664	-11.1073	-10.4529	LOC_Os05g07632		haloacid dehalogenase-like hydrolase family protein, putative, expressed
SY-GWP-ind-9311-HV	OD	Chr2_19708917	2	19704158	19765916	0.765645	5.25591	8.90705	LOC_Os02g33200		retrotransposon protein, putative, unclassified, expressed
SY-GWP-ind-9311-HV	OD	Chr11_16022068	11	15934984	16282930	1.10266	7.24284	8.89973	LOC_Os11g27910		retrotransposon protein, putative, Ty3-gypsy subclass, expressed
SY-GWP-ind-9311-HV	OD	Chr11_16022068	11	15934984	16282930	1.10266	7.24284	8.89973	LOC_Os11g27830		retrotransposon protein, putative, Ty3-gypsy subclass, expressed
SY-GWP-ind-9311-HV	OD	Chr9_8703837	9	8620825	8874117	0.396301	-7.9621	-44.3887	LOC_Os09g14690		retrotransposon protein, putative, unclassified, expressed
SY-GWP-ind-9311-HV	OD	Chr4_33654415	4	33653961	33661398	0.916329	8.0417	9.2932	LOC_Os04g56470		amino acid transporter, putative, expressed
SY-GWP-ind-9311-HV	OD	Chr5_4052804	5	4052804	4553089	1.06664	-11.1073	-10.4529	LOC_Os05g07640		expressed protein
SY-GWP-ind-9311-HV	OD	Chr7_7687004	7	7686525	7727873	0.48248	-13.2953	-57.2852	LOC_Os07g13430		transposon protein, putative, CACTA, En/Spm sub-class, expressed
SY-GWP-ind-9311-HV	OD	Chr12_2147456	12	1850787	2158522	0.298371	-15.0675	-84.2938	LOC_Os12g04980		DNA repair protein Rad51, putative, expressed
SY-GWP-ind-9311-HV	D	Chr4_24827955	4	24825105	24858572	0.304377	0.255757	1.60233	LOC_Os04g41960		NADP-dependent oxidoreductase, putative, expressed
SY-GWP-ind-9311-HV	OD	Chr8_9375606	8	9319540	9378333	1.20145	7.0128	6.13231	LOC_Os08g15350		retrotransposon protein, putative, unclassified, expressed
SY-GWP-ind-9311-HV	OD	Chr11_16022068	11	15934984	16282930	1.10266	7.24284	8.89973	LOC_Os11g27670		retrotransposon, putative, centromere-specific
SY-GWP-ind-9311-HV	OD	Chr1_3564292	1	3458050	3590080	0.765654	-5.97976	-8.60045	LOC_Os01g07490		RST1, putative, expressed
SY-GWP-ind-9311-HV	OD	Chr11_4803736	11	4745027	5672628	0.337176	-6.56934	-35.1843	LOC_Os11g09040		expressed protein
SY-GWP-ind-9311-HV	OD	Chr1_22134955	1	22099361	22717841	0.808657	-7.2228	-73.866	LOC_Os01g40250		down-regulated in metastasis family protein, expressed
SY-GWP-ind-9311-HV	OD	Chr1_22134955	1	22099361	22717841	0.808657	-7.2228	-73.866	LOC_Os01g39290		harpin-induced protein 1 domain containing protein, expressed
SY-GWP-ind-9311-HV	OD	Chr8_9375606	8	9319540	9378333	1.20145	7.0128	6.13231	LOC_Os08g15400		retrotransposon protein, putative, unclassified, expressed
SY-GWP-ind-9311-HV	OD	Chr8_9375606	8	9319540	9378333	1.20145	7.0128	6.13231	LOC_Os08g15410		expressed protein
SY-GWP-ind-9311-HV	OD	Chr1_3564292	1	3458050	3590080	0.765654	-5.97976	-8.60045	LOC_Os01g07330		expressed protein
SY-GWP-ind-9311-HV	OD	Chr11_16022068	11	15934984	16282930	1.10266	7.24284	8.89973	LOC_Os11g27900		retrotransposon protein, putative, unclassified
SY-GWP-ind-9311-HV	OD	Chr2_19708917	2	19704158	19765916	0.765645	5.25591	8.90705	LOC_Os02g33120		expressed protein
SY-GWP-ind-9311-HV	OD	Chr2_19708917	2	19704158	19765916	0.765645	5.25591	8.90705	LOC_Os02g33250		expressed protein
SY-GWP-ind-9311-HV	OD	Chr4_33654415	4	33653961	33661398	0.916329	8.0417	9.2932	LOC_Os04g56450		protein phosphatase 2C, putative, expressed
SY-GWP-ind-9311-HV	OD	Chr12_2147456	12	1850787	2158522	0.298371	-15.0675	-84.2938	LOC_Os12g04360		calmodulin-like protein 1, putative, expressed
SY-GWP-ind-9311-HV	OD	Chr12_463516	12	463516	480343	0.170731	-11.4931	-95.5348	LOC_Os12g01790		retrotransposon protein, putative, unclassified, expressed
SY-GWP-ind-9311-HV	D	Chr4_24827955	4	24825105	24858572	0.304377	0.255757	1.60233	LOC_Os04g41880		transposon protein, putative, unclassified, expressed
SY-GWP-ind-9311-HV	D	Chr4_24827955	4	24825105	24858572	0.304377	0.255757	1.60233	LOC_Os04g41950		calcium-binding mitochondrial protein anon-60Da, putative, expressed
SY-GWP-ind-9311-HV	OD	Chr5_8114112	5	8114112	8211805	1.37591	8.50284	7.26515	LOC_Os05g14510		retrotransposon protein, putative, unclassified, expressed
SY-GWP-ind-9311-HV	OD	Chr2_19708917	2	19704158	19765916	0.765645	5.25591	8.90705	LOC_Os02g33260		retrotransposon protein, putative, unclassified, expressed
SY-GWP-ind-9311-HV	OD	Chr12_463516	12	463516	480343	0.170731	-11.4931	-95.5348	LOC_Os12g01760		F-box/LRR domain containing protein, putative, expressed
SY-GWP-ind-9311-HV	OD	Chr11_23565382	11	23050175	23979855	0.786504	5.52761	8.70642	LOC_Os11g38800		zinc finger family protein, putative, expressed
SY-GWP-ind-9311-HV	D	Chr4_24827955	4	24825105	24858572	0.304377	0.255757	1.60233	LOC_Os04g41890		hypothetical protein
SY-GWP-ind-9311-HV	OD	Chr11_23565382	11	23050175	23979855	0.786504	5.52761	8.70642	LOC_Os11g40200		expressed protein
SY-GWP-ind-9311-HV	OD	Chr5_4052804	5	4052804	4553089	1.06664	-11.1073	-10.4529	LOC_Os05g08350		OsFBX162 - F-box domain containing protein, expressed
SY-GWP-ind-9311-HV	OD	Chr7_7687004	7	7686525	7727873	0.48248	-13.2953	-57.2852	LOC_Os07g13400		transposon protein, putative, CACTA, En/Spm sub-class, expressed
SY-GWP-ind-9311-HV	OD	Chr5_8114112	5	8114112	8211805	1.37591	8.50284	7.26515	LOC_Os05g14400		retrotransposon protein, putative, unclassified, expressed
SY-GWP-ind-9311-P	A	Chr4_6350959	4	6258499	6376105	3.48028	0.00121264	0.0013837	LOC_Os04g11440		F-box protein interaction domain containing protein, expressed
SY-GWP-ind-9311-P	A	Chr4_6350959	4	6258499	6376105	3.48028	0.00121264	0.0013837	LOC_Os04g11600		transposon protein, putative, CACTA, En/Spm sub-class, expressed
SY-GWP-ind-9311-P	OD	Chr7_21244074	7	21242160	21246594	1.18373	-2.23802	-2.18133	LOC_Os07g35520		glucan endo-1,3-beta-glucosidase precursor, putative, expressed
SY-GWP-ind-9311-P	OD	Chr1_12417715	1	12417714	12663638	1.49113	-4.86863	-3.57249	LOC_Os01g22510		cyclase/dehydrase family protein, expressed
SY-GWP-ind-9311-P	OD	Chr1_18454924	1	18418982	18466003	2.03266	-3.68821	-1.83467	LOC_Os01g33460		retrotransposon protein, putative, unclassified, expressed
SY-GWP-ind-9311-P	A	Chr3_29568351	3	29045628	29634284	2.47102	-0.512821	-0.123288	LOC_Os03g50850		ZOS3-17 - C2H2 zinc finger protein, expressed
SY-GWP-ind-9311-P	OD	Chr7_21244074	7	21242160	21246594	1.18373	-2.23802	-2.18133	LOC_Os07g35510		glucan endo-1,3-beta-glucosidase precursor, putative, expressed
SY-GWP-ind-9311-P	D	Chr4_16011151	4	15905578	16011865	3.34253	-3.84333	-1.18069	LOC_Os04g27070		terpene synthase, putative, expressed
SY-GWP-ind-9311-P	A	Chr3_29568351	3	29045628	29634284	2.47102	-0.512821	-0.123288	LOC_Os03g51710		homeobox protein knotted-1, putative, expressed
SY-GWP-ind-9311-P	A	Chr4_6350959	4	6258499	6376105	3.48028	0.00121264	0.0013837	LOC_Os04g11610		retrotransposon protein, putative, unclassified, expressed
SY-GWP-ind-9311-P	OD	Chr5_2559436	5	2459436	2659436	0.592859	-10.059	-16.9669	LOC_Os05g05230		expressed protein
SY-GWP-ind-9311-P	D	Chr4_16011151	4	15905578	16011865	3.34253	-3.84333	-1.18069	LOC_Os04g26880		transposon protein, putative, unclassified, expressed
SY-GWP-ind-9311-P	OD	Chr1_18454924	1	18418982	18466003	2.03266	-3.68821	-1.83467	LOC_Os01g33514		expressed protein
SY-GWP-ind-9311-P	OD	Chr4_16287360	4	16287360	16299534	4.86569	-8.35332	-1.79056	LOC_Os04g27540		terpene synthase, putative, expressed
SY-GWP-ind-9311-P	D	Chr12_20043554	12	20043544	20087360	2.3605	1.24422	0.412513	LOC_Os12g33210		OsFBL59 - F-box domain and LRR containing protein, expressed
SY-GWP-ind-9311-P	A	Chr4_6350959	4	6258499	6376105	3.48028	0.00121264	0.0013837	LOC_Os04g11620		retrotransposon protein, putative, unclassified, expressed
SY-GWP-ind-9311-P	OD	Chr1_18454924	1	18418982	18466003	2.03266	-3.68821	-1.83467	LOC_Os01g33540		transposon protein, putative, unclassified, expressed
SY-GWP-ind-9311-P	D	Chr12_20043554	12	20043544	20087360	2.3605	1.24422	0.412513	LOC_Os12g33130		expressed protein
SY-GWP-ind-9311-P	OD	Chr1_18454924	1	18418982	18466003	2.03266	-3.68821	-1.83467	LOC_Os01g33510		expressed protein
SY-GWP-ind-9311-P	A	Chr4_6350959	4	6258499	6376105	3.48028	0.00121264	0.0013837	LOC_Os04g11630		expressed protein
SY-GWP-ind-9311-P	OD	Chr1_12417715	1	12417714	12663638	1.49113	-4.86863	-3.57249	LOC_Os01g22120		retrotransposon protein, putative, unclassified, expressed
SY-GWP-ind-9311-P	OD	Chr3_24475852	3	24475852	24487688	1.77758	-4.79251	-2.81163	LOC_Os03g43760		protein kinase domain containing protein, expressed
SY-GWP-ind-9311-P	OD	Chr1_18454924	1	18418982	18466003	2.03266	-3.68821	-1.83467	LOC_Os01g33550		MEGL19 - Maternally expressed gene MEG family protein precursor, putative, expressed
SY-GWP-ind-9311-P	D	Chr12_21854288	12	21630697	21854533	3.38549	-2.35425	-0.664774	LOC_Os12g35570		tRNA synthetase, putative, expressed
SY-GWP-ind-9311-P	OD	Chr1_18454924	1	18418982	18466003	2.03266	-3.68821	-1.83467	LOC_Os01g33520		ulp1 protease family, C-terminal catalytic domain containing protein, expressed
SY-GWP-ind-9311-P	OD	Chr5_5869791	5	5866292	5882559	1.24617	3.86211	3.11384	LOC_Os05g10690		Myb transcription factor, putative, expressed
SY-GWP-ind-9311-P	A	Chr12_3663522	12	3140729	3665837	3.32519	-1.03848	-0.405038	LOC_Os12g06510		calcineurin B, putative, expressed
SY-GWP-ind-9311-P	OD	Chr8_25402742	8	25402742	25411193	2.64214	-5.14494	-1.92556	LOC_Os08g40140		geranylgeranyl transferase type-2 subunit beta, putative, expressed
SY-GWP-ind-9311-P	D	Chr6_28408105	6	28386358	28594705	3.22829	3.96489	1.04094	LOC_Os06g47160		hypothetical protein
SY-GWP-ind-9311-P	A	Chr4_6350959	4	6258499	6376105	3.48028	0.00121264	0.0013837	LOC_Os04g11490		retrotransposon protein, putative, unclassified
SY-GWP-ind-9311-P	D	Chr6_28408105	6	28386358	28594705	3.22829	3.96489	1.04094	LOC_Os06g46730		expressed protein
SY-GWP-ind-9311-P	OD	Chr1_18454924	1	18418982	18466003	2.03266	-3.68821	-1.83467	LOC_Os01g33490		OsFBX10 - F-box domain containing protein, expressed
SY-GWP-ind-9311-P	A	Chr4_6350959	4	6258499	6376105	3.48028	0.00121264	0.0013837	LOC_Os04g11500		retrotransposon protein, putative, unclassified, expressed
SY-GWP-ind-9311-P	A	Chr2_34357981	2	34357981	34566539	2.60161	-0.156874	-0.693502	LOC_Os02g56140		helix-loop-helix DNA-binding domain containing protein, expressed
SY-GWP-ind-9311-P	A	Chr2_34357981	2	34357981	34566539	2.60161	-0.156874	-0.693502	LOC_Os02g56460		dehydrogenase, putative, expressed
SY-GWP-ind-9311-P	D	Chr3_32914307	3	32888648	32922432	4.72108	3.32023	0.58348	LOC_Os03g57760		25.3 kDa vesicle transport protein, putative, expressed
SY-GWP-ind-9311-P	D	Chr7_15272998	7	15269284	15278870	2.93081	2.14146	0.729927	LOC_Os07g26510		retrotransposon protein, putative, unclassified, expressed
SY-GWP-ind-9311-P	A	Chr12_3663522	12	3140729	3665837	3.32519	-1.03848	-0.405038	LOC_Os12g07430		expressed protein
SY-GWP-ind-9311-P	OD	Chr1_18454924	1	18418982	18466003	2.03266	-3.68821	-1.83467	LOC_Os01g33480		expressed protein
SY-GWP-ind-9311-P	A	Chr3_35587407	3	35587407	35787407	2.79774	0.562319	0.202927	LOC_Os03g62900		OsDegp4 - Putative Deg protease homologue, expressed
SY-GWP-ind-9311-P	OD	Chr1_18454924	1	18418982	18466003	2.03266	-3.68821	-1.83467	LOC_Os01g33530		expressed protein
SY-GWP-ind-9311-P	OD	Chr1_18454924	1	18418982	18466003	2.03266	-3.68821	-1.83467	LOC_Os01g33500		6-phosphogluconate dehydrogenase NAD-binding domain-containing protein, putative
SY-GWP-jap-Nip-F1	OD	Chr4_9976346	4	9335178	11146433	0.649696	8.19205	12.7272	LOC_Os04g19170		hypothetical protein
SY-GWP-jap-Nip-F1	OD	Chr9_20715292	9	19576412	21273168	0.712951	8.04781	11.2928	LOC_Os09g36880		GDSL-like lipase/acylhydrolase, putative, expressed
SY-GWP-jap-Nip-F1	OD	Chr7_19127009	7	18585253	20083483	2.18602	11.7866	5.49278	LOC_Os07g32170		OsSPL13 - SBP-box gene family member, expressed
SY-GWP-jap-Nip-F1	OD	Chr5_7113004	5	7113004	7153004	1.59575	8.56197	5.3655	LOC_Os05g12370		expressed protein
SY-GWP-jap-Nip-F1	D	Chr8_5456190	8	5456190	5632932	2.57532	-3.07394	-1.26343	LOC_Os08g09690		nuclear transcription factor Y subunit, putative, expressed
SY-GWP-jap-Nip-F1	OD	Chr7_19127009	7	18585253	20083483	2.18602	11.7866	5.49278	LOC_Os07g31870		expressed protein
SY-GWP-jap-Nip-F1	OD	Chr4_9976346	4	9335178	11146433	0.649696	8.19205	12.7272	LOC_Os04g17050		glutaredoxin family protein, expressed
SY-GWP-jap-Nip-F1	OD	Chr10_11321055	10	11246784	12210486	0.637405	8.06078	12.653	LOC_Os10g21870		expressed protein
SY-GWP-jap-Nip-F1	OD	Chr7_19127009	7	18585253	20083483	2.18602	11.7866	5.49278	LOC_Os07g33620		cytochrome P450 domain containing protein, expressed
SY-GWP-jap-Nip-F1	OD	Chr7_19127009	7	18585253	20083483	2.18602	11.7866	5.49278	LOC_Os07g31850		zinc finger, C3HC4 type domain containing protein, expressed
SY-GWP-jap-Nip-F1	OD	Chr3_9898679	3	9162465	9913515	0.700248	8.28587	11.8631	LOC_Os03g17800		phosphatidylinositol transfer protein alpha isoform, putative, expressed
SY-GWP-jap-Nip-F1	D	Chr8_5456190	8	5456190	5632932	2.57532	-3.07394	-1.26343	LOC_Os08g09570		expressed protein
SY-GWP-jap-Nip-F1	OD	Chr8_7892355	8	7892355	7992355	2.11996	-3.41737	-1.612	LOC_Os08g13270		expressed protein
SY-GWP-jap-Nip-F1	OD	Chr7_19127009	7	18585253	20083483	2.18602	11.7866	5.49278	LOC_Os07g32450		protein kinase PKN/PRK1, effector, putative, expressed
SY-GWP-jap-Nip-F1	OD	Chr4_9976346	4	9335178	11146433	0.649696	8.19205	12.7272	LOC_Os04g19990		retrotransposon protein, putative, unclassified, expressed
SY-GWP-jap-Nip-F1	OD	Chr7_19127009	7	18585253	20083483	2.18602	11.7866	5.49278	LOC_Os07g32200		transposon protein, putative, CACTA, En/Spm sub-class
SY-GWP-jap-Nip-F1	OD	Chr2_2066638	2	2066638	2199096	0.691553	8.21516	11.8861	LOC_Os02g04620		marker Xucw84, putative
SY-GWP-jap-Nip-F1	D	Chr8_5456190	8	5456190	5632932	2.57532	-3.07394	-1.26343	LOC_Os08g09710		OsFBX271 - F-box domain containing protein, expressed
SY-GWP-jap-Nip-F1	OD	Chr7_8305383	7	8304299	8306441	1.44306	-5.17156	-3.63083	LOC_Os07g14560		retrotransposon protein, putative, unclassified, expressed
SY-GWP-jap-Nip-F1	OD	Chr7_20388914	7	20359371	20399956	2.03144	11.8324	6.12924	LOC_Os07g34100		retrotransposon protein, putative, unclassified, expressed
SY-GWP-jap-Nip-F1	OD	Chr7_19127009	7	18585253	20083483	2.18602	11.7866	5.49278	LOC_Os07g32150		retrotransposon protein, putative, Ty1-copia subclass, expressed
SY-GWP-jap-Nip-F1	OD	Chr12_25794986	12	25694981	25795006	0.715246	8.11003	11.3454	LOC_Os12g41670		expressed protein
SY-GWP-jap-Nip-F1	OD	Chr10_18277802	10	18277802	18277802	0.459716	-6.58387	-14.3216	LOC_Os10g34240		expressed protein
SY-GWP-jap-Nip-F1	OD	Chr7_19127009	7	18585253	20083483	2.18602	11.7866	5.49278	LOC_Os07g32129		expressed protein
SY-GWP-jap-Nip-F1	OD	Chr9_20715292	9	19576412	21273168	0.712951	8.04781	11.2928	LOC_Os09g32830		nucleotide pyrophosphatase/phosphodiesterase, putative, expressed
SY-GWP-jap-Nip-F1	OD	Chr3_9898679	3	9162465	9913515	0.700248	8.28587	11.8631	LOC_Os03g17610		OsTOP6A3 - Topoisomerase 6 subunit A homolog 3, expressed
SY-GWP-jap-Nip-F1	D	Chr8_5456190	8	5456190	5632932	2.57532	-3.07394	-1.26343	LOC_Os08g09420		OsFBX266 - F-box domain containing protein, expressed
SY-GWP-jap-Nip-F1	D	Chr8_5456190	8	5456190	5632932	2.57532	-3.07394	-1.26343	LOC_Os08g09750		OsFBL44 - F-box domain and LRR containing protein, expressed
SY-GWP-jap-Nip-HV	OD	Chr3_10681155	3	10534912	11113588	2.22572	10.1641	4.64625	LOC_Os03g19070		long cell-linked locus protein, putative, expressed
SY-GWP-jap-Nip-HV	OD	Chr3_10681155	3	10534912	11113588	2.22572	10.1641	4.64625	LOC_Os03g19120		MYB family transcription factor, putative, expressed
SY-GWP-jap-Nip-HV	OD	Chr3_10681155	3	10534912	11113588	2.22572	10.1641	4.64625	LOC_Os03g18940		exonuclease, putative, expressed
SY-GWP-jap-Nip-HV	OD	Chr3_10681155	3	10534912	11113588	2.22572	10.1641	4.64625	LOC_Os03g18860		pectinesterase, putative, expressed
SY-GWP-jap-Nip-HV	OD	Chr7_19156147	7	18989536	20104947	2.58898	11.5164	4.52694	LOC_Os07g31960		UDP-glucoronosyl and UDP-glucosyl transferase domain containing protein, expressed
SY-GWP-jap-Nip-HV	OD	Chr4_10848076	4	10731441	11214469	0.784071	8.35165	10.6789	LOC_Os04g19290		retrotransposon protein, putative, Ty3-gypsy subclass, expressed
SY-GWP-jap-Nip-HV	OD	Chr3_10681155	3	10534912	11113588	2.22572	10.1641	4.64625	LOC_Os03g18800		retrotransposon protein, putative, Ty3-gypsy subclass
SY-GWP-jap-Nip-HV	OD	Chr3_10681155	3	10534912	11113588	2.22572	10.1641	4.64625	LOC_Os03g19709		expressed protein
SY-GWP-jap-Nip-HV	OD	Chr7_22086916	7	22086916	22486916	1.30349	10.6431	8.16506	LOC_Os07g36910		OsFBX254 - F-box domain containing protein, expressed
SY-GWP-jap-Nip-HV	OD	Chr7_19156147	7	18989536	20104947	2.58898	11.5164	4.52694	LOC_Os07g32340		retrotransposon protein, putative, unclassified, expressed
SY-GWP-jap-Nip-HV	OD	Chr6_22828479	6	22675284	22831694	2.1717	12.8722	6.08293	LOC_Os06g38520		pectate lyase family protein, expressed
SY-GWP-jap-Nip-HV	OD	Chr6_294960	6	225467	294972	1.91656	9.4884	5.2669	LOC_Os06g01480		NAC domain containing protein, putative, expressed
SY-GWP-jap-Nip-HV	OD	Chr9_22265352	9	21221619	22268339	0.797349	8.45944	10.6904	LOC_Os09g38750		expressed protein
SY-GWP-jap-Nip-HV	OD	Chr7_19156147	7	18989536	20104947	2.58898	11.5164	4.52694	LOC_Os07g32470		expressed protein
SY-GWP-jap-Nip-HV	OD	Chr12_24043303	12	24003303	24343303	2.13994	10.6385	4.97799	LOC_Os12g39090		expressed protein
SY-GWP-jap-Nip-HV	OD	Chr7_19156147	7	18989536	20104947	2.58898	11.5164	4.52694	LOC_Os07g32450		protein kinase PKN/PRK1, effector, putative, expressed
SY-GWP-jap-Nip-HV	OD	Chr7_19156147	7	18989536	20104947	2.58898	11.5164	4.52694	LOC_Os07g33650		expressed protein
SY-GWP-jap-Nip-HV	OD	Chr3_10681155	3	10534912	11113588	2.22572	10.1641	4.64625	LOC_Os03g19760		HAD-superfamily hydrolase, subfamily IA, variant 3 containing protein, expressed
SY-GWP-jap-Nip-HV	OD	Chr5_27963752	5	27963752	28834664	1.87338	14.4172	7.92547	LOC_Os05g50310		ZF-HD protein dimerisation region containing protein, expressed
SY-GWP-jap-Nip-HV	OD	Chr4_10848076	4	10731441	11214469	0.784071	8.35165	10.6789	LOC_Os04g19990		retrotransposon protein, putative, unclassified, expressed
SY-GWP-jap-Nip-HV	OD	Chr3_10681155	3	10534912	11113588	2.22572	10.1641	4.64625	LOC_Os03g19010		peroxisomal biogenesis factor 11, putative, expressed
SY-GWP-jap-Nip-HV	OD	Chr9_22265352	9	21221619	22268339	0.797349	8.45944	10.6904	LOC_Os09g38755		E3 ubiquitin-protein ligase HERC2, putative, expressed
SY-GWP-jap-Nip-HV	OD	Chr3_10681155	3	10534912	11113588	2.22572	10.1641	4.64625	LOC_Os03g18930		hypothetical protein
SY-GWP-jap-Nip-HV	OD	Chr4_10848076	4	10731441	11214469	0.784071	8.35165	10.6789	LOC_Os04g20130		retrotransposon protein, putative, unclassified
SY-GWP-jap-Nip-HV	OD	Chr3_10681155	3	10534912	11113588	2.22572	10.1641	4.64625	LOC_Os03g18910		COBRA-like protein 7 precursor, putative, expressed
SY-GWP-jap-Nip-HV	OD	Chr9_22265352	9	21221619	22268339	0.797349	8.45944	10.6904	LOC_Os09g38740		expressed protein
SY-GWP-jap-Nip-HV	OD	Chr4_10848076	4	10731441	11214469	0.784071	8.35165	10.6789	LOC_Os04g20120		retrotransposon protein, putative, unclassified, expressed
SY-GWP-jap-Nip-HV	OD	Chr4_10848076	4	10731441	11214469	0.784071	8.35165	10.6789	LOC_Os04g19480		retrotransposon protein, putative, Ty3-gypsy subclass, expressed
SY-GWP-jap-Nip-HV	OD	Chr5_27963752	5	27963752	28834664	1.87338	14.4172	7.92547	LOC_Os05g48790		expressed protein
SY-GWP-jap-Nip-HV	OD	Chr7_22086916	7	22086916	22486916	1.30349	10.6431	8.16506	LOC_Os07g36880		expressed protein
SY-GWP-jap-Nip-P	D	Chr12_8780094	12	7525138	9471768	5.74527	-8.49459	-1.46499	LOC_Os12g13810		caffeic acid 3-O-methyltransferase, putative, expressed
SY-GWP-jap-Nip-P	D	Chr12_10648991	12	10043310	10723060	3.90649	-4.80906	-1.19879	LOC_Os12g18150		ZOS12-04 - C2H2 zinc finger protein, expressed
SY-GWP-jap-Nip-P	D	Chr12_8780094	12	7525138	9471768	5.74527	-8.49459	-1.46499	LOC_Os12g15420		nucampholin, putative, expressed
SY-GWP-jap-Nip-P	D	Chr12_11110760	12	10723229	12723153	3.16913	-2.65774	-0.370817	LOC_Os12g18750		expressed protein
SY-GWP-jap-Nip-P	D	Chr12_8780094	12	7525138	9471768	5.74527	-8.49459	-1.46499	LOC_Os12g15450		expressed protein
SY-GWP-jap-Nip-P	D	Chr4_5622439	4	5563919	5656118	5.31214	-4.8515	-0.769184	LOC_Os04g10420		CW7, putative, expressed
SY-GWP-jap-Nip-P	D	Chr12_10648991	12	10043310	10723060	3.90649	-4.80906	-1.19879	LOC_Os12g17550		expressed protein
SY-GWP-jap-Nip-P	D	Chr12_8780094	12	7525138	9471768	5.74527	-8.49459	-1.46499	LOC_Os12g14040		retrotransposon protein, putative, Ty3-gypsy subclass
SY-GWP-jap-Nip-P	D	Chr12_11110760	12	10723229	12723153	3.16913	-2.65774	-0.370817	LOC_Os12g20460		retrotransposon protein, putative, Ty3-gypsy subclass, expressed
SY-GWP-jap-Nip-P	D	Chr12_11110760	12	10723229	12723153	3.16913	-2.65774	-0.370817	LOC_Os12g18800		transposon protein, putative, unclassified, expressed
SY-GWP-jap-Nip-P	D	Chr12_11110760	12	10723229	12723153	3.16913	-2.65774	-0.370817	LOC_Os12g18550		expressed protein
SY-GWP-jap-Nip-P	D	Chr1_39092258	1	39092258	39097436	3.33097	-3.6445	-1.10231	LOC_Os01g67350		cysteine protease, putative, expressed
SY-GWP-jap-Nip-P	OD	Chr10_4203477	10	3747471	4508210	0.982458	1.61441	1.91525	LOC_Os10g07130		expressed protein
SY-GWP-jap-Nip-P	D	Chr12_10648991	12	10043310	10723060	3.90649	-4.80906	-1.19879	LOC_Os12g17520		conserved hypothetical protein
SY-GWP-jap-Nip-P	D	Chr12_10648991	12	10043310	10723060	3.90649	-4.80906	-1.19879	LOC_Os12g18479		retrotransposon protein, putative, unclassified
SY-GWP-jap-Nip-P	D	Chr12_11110760	12	10723229	12723153	3.16913	-2.65774	-0.370817	LOC_Os12g18660		expressed protein
SY-GWP-jap-Nip-P	D	Chr12_8780094	12	7525138	9471768	5.74527	-8.49459	-1.46499	LOC_Os12g14374		retrotransposon protein, putative, Ty3-gypsy subclass, expressed
SY-GWP-jap-Nip-P	D	Chr7_10322120	7	10316049	10678186	3.21038	-3.87171	-1.20157	LOC_Os07g17780		transposon protein, putative, unclassified, expressed
SY-GWP-jap-Nip-P	OD	Chr10_6642076	10	6538762	6738187	0.774956	2.43708	3.49531	LOC_Os10g12050		expressed protein
SY-GWP-jap-Nip-P	D	Chr12_11110760	12	10723229	12723153	3.16913	-2.65774	-0.370817	LOC_Os12g18729		expressed protein
SY-GWP-jap-Nip-P	OD	Chr10_4203477	10	3747471	4508210	0.982458	1.61441	1.91525	LOC_Os10g07510		DUF260 domain containing protein, putative, expressed
SY-GWP-jap-Nip-P	D	Chr6_8597036	6	8352860	9024506	3.18225	-3.41805	-1.0163	LOC_Os06g15260		retrotransposon protein, putative, Ty1-copia subclass, expressed
SY-GWP-jap-Nip-P	D	Chr7_10322120	7	10316049	10678186	3.21038	-3.87171	-1.20157	LOC_Os07g17480		retrotransposon protein, putative, unclassified
SY-GWP-jap-Nip-P	D	Chr12_10648991	12	10043310	10723060	3.90649	-4.80906	-1.19879	LOC_Os12g18400		retrotransposon protein, putative, unclassified, expressed
SY-GWP-jap-Nip-P	OD	Chr7_20757149	7	20727717	20767438	3.66917	6.61669	1.80714	LOC_Os07g34580		glycosyl hydrolases family 16, putative, expressed
SY-GWP-jap-Nip-P	OD	Chr10_6642076	10	6538762	6738187	0.774956	2.43708	3.49531	LOC_Os10g12130		retrotransposon protein, putative, Ty3-gypsy subclass, expressed
SY-GWP-jap-Nip-P	D	Chr1_40451568	1	40001242	40465090	3.92036	-5.29513	-1.28584	LOC_Os01g69970		WD domain, G-beta repeat domain containing protein, expressed
SY-GWP-jap-Nip-P	D	Chr12_8780094	12	7525138	9471768	5.74527	-8.49459	-1.46499	LOC_Os12g14100		amino acid transporter, putative, expressed
SY-GWP-jap-Nip-P	D	Chr12_10648991	12	10043310	10723060	3.90649	-4.80906	-1.19879	LOC_Os12g18490		hypothetical protein
SY-GWP-jap-Nip-P	D	Chr7_10322120	7	10316049	10678186	3.21038	-3.87171	-1.20157	LOC_Os07g17770		tryptophanyl-tRNA synthetase, cytoplasmic, putative, expressed
SY-GWP-jap-Nip-P	D	Chr12_8780094	12	7525138	9471768	5.74527	-8.49459	-1.46499	LOC_Os12g13990		retrotransposon protein, putative, Ty3-gypsy subclass, expressed
SY-GWP-jap-Nip-P	D	Chr6_8597036	6	8352860	9024506	3.18225	-3.41805	-1.0163	LOC_Os06g15730		expressed protein
SY-GWP-jap-Nip-P	D	Chr12_8780094	12	7525138	9471768	5.74527	-8.49459	-1.46499	LOC_Os12g13520		retrotransposon, putative, centromere-specific, expressed
SY-GWP-jap-Nip-P	D	Chr12_11110760	12	10723229	12723153	3.16913	-2.65774	-0.370817	LOC_Os12g18790		expressed protein
SY-GWP-jap-Nip-P	D	Chr4_5622439	4	5563919	5656118	5.31214	-4.8515	-0.769184	LOC_Os04g10380		glycine-rich protein, putative, expressed
SY-GWP-jap-Nip-P	OD	Chr10_4203477	10	3747471	4508210	0.982458	1.61441	1.91525	LOC_Os10g08014		white-brown complex homolog protein 11, putative, expressed
SY-GWP-jap-Nip-P	D	Chr12_10648991	12	10043310	10723060	3.90649	-4.80906	-1.19879	LOC_Os12g18010		transposon protein, putative, CACTA, En/Spm sub-class, expressed
SY-GWP-jap-Nip-P	D	Chr12_11110760	12	10723229	12723153	3.16913	-2.65774	-0.370817	LOC_Os12g18670		expressed protein
SY-GWP-jap-Nip-P	D	Chr12_10648991	12	10043310	10723060	3.90649	-4.80906	-1.19879	LOC_Os12g17940		expressed protein
SY-GWP-jap-Nip-P	D	Chr2_24202087	2	24202086	24583401	4.208	-4.66934	-1.07439	LOC_Os02g40070		AP2-like ethylene-responsive transcription factor PLETHORA 2, putative, expressed
SY-GWP-jap-Nip-P	D	Chr7_10322120	7	10316049	10678186	3.21038	-3.87171	-1.20157	LOC_Os07g17560		expressed protein
SY-GWP-jap-Nip-P	D	Chr12_5794573	12	5794573	5794573	4.36028	-6.31386	-1.44804	LOC_Os12g10770		retrotransposon protein, putative, unclassified, expressed
SY-GWP-jap-Nip-P	D	Chr12_10648991	12	10043310	10723060	3.90649	-4.80906	-1.19879	LOC_Os12g18510		expressed protein
SY-GWP-jap-Nip-P	D	Chr12_11110760	12	10723229	12723153	3.16913	-2.65774	-0.370817	LOC_Os12g19140		retrotransposon protein, putative, unclassified, expressed
SY-GWP-jap-Nip-P	D	Chr12_11110760	12	10723229	12723153	3.16913	-2.65774	-0.370817	LOC_Os12g18760		peptidase family C78 domain containing protein, expressed
SY-GWP-jap-Nip-P	OD	Chr10_6642076	10	6538762	6738187	0.774956	2.43708	3.49531	LOC_Os10g11830		expressed protein
SY-GWP-jap-Nip-P	OD	Chr10_4203477	10	3747471	4508210	0.982458	1.61441	1.91525	LOC_Os10g07574		transposon protein, putative, unclassified, expressed
SY-GWP-jap-Nip-P	D	Chr7_10322120	7	10316049	10678186	3.21038	-3.87171	-1.20157	LOC_Os07g17600		retrotransposon protein, putative, Ty3-gypsy subclass
SY-GWP-jap-Nip-P	D	Chr4_5622439	4	5563919	5656118	5.31214	-4.8515	-0.769184	LOC_Os04g10300		hypothetical protein
SY-GWP-jap-Nip-P	D	Chr7_10322120	7	10316049	10678186	3.21038	-3.87171	-1.20157	LOC_Os07g17820		transposon protein, putative, unclassified, expressed
SY-GWP-jap-Nip-P	OD	Chr10_4203477	10	3747471	4508210	0.982458	1.61441	1.91525	LOC_Os10g07966		expressed protein
SY-GWP-jap-Nip-P	OD	Chr10_8984057	10	8984057	9029677	0.697006	2.42245	3.48833	LOC_Os10g17840		retrotransposon protein, putative, Ty3-gypsy subclass, expressed
SY-GWP-jap-Nip-P	D	Chr12_8780094	12	7525138	9471768	5.74527	-8.49459	-1.46499	LOC_Os12g15400		CXE carboxylesterase, putative, expressed
SY-GWP-jap-Nip-P	D	Chr7_10322120	7	10316049	10678186	3.21038	-3.87171	-1.20157	LOC_Os07g17570		transposon protein, putative, unclassified, expressed
SY-GWP-jap-Nip-P	D	Chr12_8780094	12	7525138	9471768	5.74527	-8.49459	-1.46499	LOC_Os12g13960		LTPL33 - Protease inhibitor/seed storage/LTP family protein precursor, expressed
SY-GWP-jap-Nip-P	D	Chr12_11110760	12	10723229	12723153	3.16913	-2.65774	-0.370817	LOC_Os12g20050		retrotransposon protein, putative, Ty3-gypsy subclass
SY-GWP-jap-Nip-P	D	Chr12_8780094	12	7525138	9471768	5.74527	-8.49459	-1.46499	LOC_Os12g13590		exocyst complex component 5, putative, expressed
SY-GWP-jap-Nip-P	OD	Chr10_8984057	10	8984057	9029677	0.697006	2.42245	3.48833	LOC_Os10g17850		retrotransposon protein, putative, Ty3-gypsy subclass
SY-GWP-jap-Nip-P	D	Chr7_10322120	7	10316049	10678186	3.21038	-3.87171	-1.20157	LOC_Os07g17790		retrotransposon protein, putative, Ty3-gypsy subclass
SY-GWP-jap-Nip-P	OD	Chr5_19645443	5	19645443	19816043	0.462695	2.5473	9.21604	LOC_Os05g33680		expressed protein
SY-GWP-jap-Nip-P	OD	Chr4_13470427	4	13470427	13670427	0.123726	6.04028	48.8196	LOC_Os04g23550		basic helix-loop-helix family protein, putative, expressed
SY-GWP-jap-Nip-P	D	Chr12_8780094	12	7525138	9471768	5.74527	-8.49459	-1.46499	LOC_Os12g14080		expressed protein
SY-GWP-jap-Nip-P	D	Chr12_8780094	12	7525138	9471768	5.74527	-8.49459	-1.46499	LOC_Os12g16310		retrotransposon, putative, centromere-specific, expressed
SY-GWP-jap-Nip-P	D	Chr12_11110760	12	10723229	12723153	3.16913	-2.65774	-0.370817	LOC_Os12g22200		retrotransposon protein, putative, unclassified, expressed
SY-GWP-jap-Nip-P	D	Chr12_8780094	12	7525138	9471768	5.74527	-8.49459	-1.46499	LOC_Os12g14090		hypothetical protein
SY-GWP-jap-Nip-P	D	Chr12_10648991	12	10043310	10723060	3.90649	-4.80906	-1.19879	LOC_Os12g18200		endonuclease/exonuclease/phosphatase family domain containing protein, expressed
SY-GWP-jap-Nip-P	OD	Chr10_6642076	10	6538762	6738187	0.774956	2.43708	3.49531	LOC_Os10g11980		transferase family protein, putative, expressed
SY-GWP-jap-Nip-P	D	Chr12_8780094	12	7525138	9471768	5.74527	-8.49459	-1.46499	LOC_Os12g13580		expressed protein
SY-GWP-jap-Nip-P	OD	Chr8_4376624	8	4356606	4396629	3.49216	-7.15499	-2.04676	LOC_Os08g07820		hypothetical protein
SY-GWP-jap-Nip-P	OD	Chr10_8984057	10	8984057	9029677	0.697006	2.42245	3.48833	LOC_Os10g17740		ZOS10-02 - C2H2 zinc finger protein, expressed
SY-GWP-jap-Nip-P	D	Chr12_11110760	12	10723229	12723153	3.16913	-2.65774	-0.370817	LOC_Os12g18690		expressed protein
SY-GWP-jap-Nip-P	OD	Chr10_4203477	10	3747471	4508210	0.982458	1.61441	1.91525	LOC_Os10g07576		retrotransposon, putative, centromere-specific
SY-GWP-jap-Nip-P	D	Chr12_8780094	12	7525138	9471768	5.74527	-8.49459	-1.46499	LOC_Os12g13570		MYB family transcription factor, putative, expressed
SY-GWP-jap-Nip-P	OD	Chr5_19645443	5	19645443	19816043	0.462695	2.5473	9.21604	LOC_Os05g33430		xyloglucanase inhibitor, putative, expressed
SY-GWP-jap-Nip-P	D	Chr12_11110760	12	10723229	12723153	3.16913	-2.65774	-0.370817	LOC_Os12g20200		retrotransposon protein, putative, unclassified, expressed
SY-GWP-jap-Nip-P	D	Chr12_8780094	12	7525138	9471768	5.74527	-8.49459	-1.46499	LOC_Os12g13440		phosphatidylinositol-4-phosphate 5-Kinase, putative, expressed
SY-GWP-jap-Nip-P	D	Chr12_10648991	12	10043310	10723060	3.90649	-4.80906	-1.19879	LOC_Os12g17560		expressed protein
SY-GWP-jap-Nip-P	D	Chr7_10322120	7	10316049	10678186	3.21038	-3.87171	-1.20157	LOC_Os07g17689		expressed protein
SY-GWP-jap-Nip-P	D	Chr7_10322120	7	10316049	10678186	3.21038	-3.87171	-1.20157	LOC_Os07g17810		retrotransposon protein, putative, Ty3-gypsy subclass, expressed
SY-GWP-jap-Nip-P	D	Chr12_11110760	12	10723229	12723153	3.16913	-2.65774	-0.370817	LOC_Os12g18560		invertase/pectin methylesterase inhibitor family protein, putative, expressed
SY-GWP-jap-Nip-P	D	Chr12_8780094	12	7525138	9471768	5.74527	-8.49459	-1.46499	LOC_Os12g16080		expressed protein
SY-GWP-jap-Nip-P	D	Chr12_8780094	12	7525138	9471768	5.74527	-8.49459	-1.46499	LOC_Os12g13800		O-methyltransferase, putative, expressed
SY-GWP-jap-Nip-P	D	Chr2_24202087	2	24202086	24583401	4.208	-4.66934	-1.07439	LOC_Os02g40530	OsMPS	MYB family transcription factor, putative, expressed
SY-GWP-jap-Nip-P	D	Chr12_11110760	12	10723229	12723153	3.16913	-2.65774	-0.370817	LOC_Os12g18810		expressed protein
SY-GWP-jap-Nip-P	D	Chr12_11110760	12	10723229	12723153	3.16913	-2.65774	-0.370817	LOC_Os12g18940		retrotransposon protein, putative, Ty3-gypsy subclass
SY-GWP-jap-Nip-P	D	Chr12_11110760	12	10723229	12723153	3.16913	-2.65774	-0.370817	LOC_Os12g18780		expressed protein
SY-GWP-jap-Nip-P	D	Chr12_10648991	12	10043310	10723060	3.90649	-4.80906	-1.19879	LOC_Os12g17950		expressed protein
SY-GWP-jap-Nip-P	OD	Chr7_20757149	7	20727717	20767438	3.66917	6.61669	1.80714	LOC_Os07g34630		expressed protein
SY-GWP-jap-Nip-P	D	Chr7_10322120	7	10316049	10678186	3.21038	-3.87171	-1.20157	LOC_Os07g17700		retrotransposon protein, putative, unclassified
SY-GWP-jap-Nip-P	D	Chr6_8597036	6	8352860	9024506	3.18225	-3.41805	-1.0163	LOC_Os06g15420		asparagine synthetase, putative, expressed
SY-GWP-jap-Nip-P	OD	Chr10_4203477	10	3747471	4508210	0.982458	1.61441	1.91525	LOC_Os10g07578		retrotransposon protein, putative, unclassified, expressed
SY-GWP-jap-Nip-P	D	Chr12_11110760	12	10723229	12723153	3.16913	-2.65774	-0.370817	LOC_Os12g18700		expressed protein
SY-GWP-jap-Nip-P	D	Chr12_11110760	12	10723229	12723153	3.16913	-2.65774	-0.370817	LOC_Os12g21510		transposon protein, putative, unclassified, expressed
SY-GWP-jap-Nip-P	D	Chr7_10322120	7	10316049	10678186	3.21038	-3.87171	-1.20157	LOC_Os07g18040		expressed protein
SY-GWP-jap-Nip-P	D	Chr12_10648991	12	10043310	10723060	3.90649	-4.80906	-1.19879	LOC_Os12g17960		expressed protein
SY-GWP-jap-Nip-P	D	Chr12_10648991	12	10043310	10723060	3.90649	-4.80906	-1.19879	LOC_Os12g18450		expressed protein
SY-GWP-jap-Nip-P	OD	Chr7_20757149	7	20727717	20767438	3.66917	6.61669	1.80714	LOC_Os07g34640		pyruvate Pi dikinase regulatory protein, putative, expressed
SY-GWP-jap-Nip-P	D	Chr1_39092258	1	39092258	39097436	3.33097	-3.6445	-1.10231	LOC_Os01g67340		STRUBBELIG-RECEPTOR FAMILY 8 precursor, putative, expressed
SY-GWP-jap-Nip-P	D	Chr12_10648991	12	10043310	10723060	3.90649	-4.80906	-1.19879	LOC_Os12g17930		expressed protein
SY-GWP-jap-Nip-P	D	Chr12_10648991	12	10043310	10723060	3.90649	-4.80906	-1.19879	LOC_Os12g18500		retrotransposon protein, putative, unclassified
CS-KGW-ind-9311-F1	OD	Chr4_4307600	4	3611070	4521705	0.0598739	0.59325	17.157	LOC_Os04g08250		expressed protein
CS-KGW-ind-9311-F1	OD	Chr4_6454390	4	6386983	6473870	0.101029	0.55255	5.77965	LOC_Os04g11790		OsFBX120 - F-box domain containing protein, expressed
CS-KGW-ind-9311-F1	OD	Chr7_21705210	7	21671657	21705210	0.0478525	0.593615	69.1912	LOC_Os07g36270		retrotransposon protein, putative, Ty1-copia subclass, expressed
CS-KGW-ind-9311-F1	OD	Chr8_8630858	8	8508402	8645784	0.172179	0.44522	2.67245	LOC_Os08g14390		expressed protein
CS-KGW-ind-9311-F1	OD	Chr5_284553	5	284553	320785	0.0325283	-0.951264	-49.3847	LOC_Os05g01510		cytoplasmic membrane protein, putative, expressed
CS-KGW-ind-9311-F1	OD	Chr6_23520093	6	22278164	23520093	0.162604	0.842199	5.21397	LOC_Os06g39240		endothelial differentiation-related factor 1, putative, expressed
CS-KGW-ind-9311-F1	OD	Chr4_1712682	4	1113703	1712701	0.107692	0.540895	6.87329	LOC_Os04g02860		disease resistance protein RPM1, putative, expressed
CS-KGW-ind-9311-F1	OD	Chr2_7451049	2	7443352	7982651	0.0559585	0.554162	19.2578	LOC_Os02g14370		retrotransposon protein, putative, Ty1-copia subclass, expressed
CS-KGW-ind-9311-F1	OD	Chr4_4307600	4	3611070	4521705	0.0598739	0.59325	17.157	LOC_Os04g07910		hypothetical protein
CS-KGW-ind-9311-F1	OD	Chr12_23403341	12	23403341	23414843	0.0184566	-1.26226	-68.421	LOC_Os12g38110		importin subunit beta, putative, expressed
CS-KGW-ind-9311-F1	OD	Chr4_4307600	4	3611070	4521705	0.0598739	0.59325	17.157	LOC_Os04g08200		expressed protein
CS-KGW-ind-9311-F1	OD	Chr2_7451049	2	7443352	7982651	0.0559585	0.554162	19.2578	LOC_Os02g14260		retrotransposon protein, putative, unclassified, expressed
CS-KGW-ind-9311-F1	OD	Chr7_16110379	7	16078506	16110805	0.0942936	0.529789	8.02544	LOC_Os07g27510		retrotransposon protein, putative, Ty1-copia subclass, expressed
CS-KGW-ind-9311-F1	OD	Chr2_7451049	2	7443352	7982651	0.0559585	0.554162	19.2578	LOC_Os02g14290		scramblase, putative, expressed
CS-KGW-ind-9311-F1	OD	Chr4_16234237	4	16152527	16281921	0.0974761	0.741001	7.62079	LOC_Os04g27450		hypothetical protein
CS-KGW-ind-9311-F1	OD	Chr2_7451049	2	7443352	7982651	0.0559585	0.554162	19.2578	LOC_Os02g14390		retrotransposon, putative, centromere-specific, expressed
CS-KGW-ind-9311-F1	OD	Chr4_28653060	4	28349320	28767814	0.108919	-0.556007	-5.42039	LOC_Os04g47830		SNF2 family N-terminal domain containing protein, expressed
CS-KGW-ind-9311-F1	OD	Chr6_23520093	6	22278164	23520093	0.162604	0.842199	5.21397	LOC_Os06g37850		transposon protein, putative, CACTA, En/Spm sub-class, expressed
CS-KGW-ind-9311-F1	OD	Chr4_5579090	4	5494573	5821630	0.155757	0.517175	3.43216	LOC_Os04g10210		expressed protein
CS-KGW-ind-9311-F1	OD	Chr6_20091972	6	20091964	20153402	0.0204019	0.610319	112.331	LOC_Os06g34570		retrotransposon protein, putative, unclassified, expressed
CS-KGW-ind-9311-F1	OD	Chr4_4307600	4	3611070	4521705	0.0598739	0.59325	17.157	LOC_Os04g08080		expressed protein
CS-KGW-ind-9311-F1	OD	Chr7_16511769	7	16508735	16512302	0.0134005	0.489748	90.2151	LOC_Os07g28260		expressed protein
CS-KGW-ind-9311-F1	OD	Chr4_4307600	4	3611070	4521705	0.0598739	0.59325	17.157	LOC_Os04g07870		transposon protein, putative, CACTA, En/Spm sub-class, expressed
CS-KGW-ind-9311-F1	OD	Chr5_23585498	5	23551788	23592643	0.0642693	0.457436	30.1882	LOC_Os05g40160		NB-ARC domain containing protein, expressed
CS-KGW-ind-9311-F1	OD	Chr2_7451049	2	7443352	7982651	0.0559585	0.554162	19.2578	LOC_Os02g13785		expressed protein
CS-KGW-ind-9311-F1	OD	Chr2_7451049	2	7443352	7982651	0.0559585	0.554162	19.2578	LOC_Os02g14300		expressed protein
CS-KGW-ind-9311-F1	OD	Chr4_28653060	4	28349320	28767814	0.108919	-0.556007	-5.42039	LOC_Os04g48260		zinc RING finger protein, putative, expressed
CS-KGW-ind-9311-F1	OD	Chr4_4307600	4	3611070	4521705	0.0598739	0.59325	17.157	LOC_Os04g08180		expressed protein
CS-KGW-ind-9311-F1	OD	Chr10_13894589	10	13894589	13953286	0.0971531	1.03253	11.4968	LOC_Os10g26730		exonuclease, putative, expressed
CS-KGW-ind-9311-F1	OD	Chr1_6368723	1	6366037	6382637	0.148199	0.396419	2.77721	LOC_Os01g11760		GDSL-like lipase/acylhydrolase, putative, expressed
CS-KGW-ind-9311-F1	OD	Chr4_5579090	4	5494573	5821630	0.155757	0.517175	3.43216	LOC_Os04g10250		expressed protein
CS-KGW-ind-9311-F1	OD	Chr8_9080250	8	9078247	9090378	0.0373078	0.478114	36.6661	LOC_Os08g15040		ADP-ribosylation factor, putative, expressed
CS-KGW-ind-9311-F1	OD	Chr8_8630858	8	8508402	8645784	0.172179	0.44522	2.67245	LOC_Os08g14260		retrotransposon protein, putative, Ty3-gypsy subclass, expressed
CS-KGW-ind-9311-F1	OD	Chr4_4307600	4	3611070	4521705	0.0598739	0.59325	17.157	LOC_Os04g08390		Leucine Rich Repeat family protein, expressed
CS-KGW-ind-9311-F1	D	Chr7_21893798	7	21720744	21899380	0.127864	-0.162898	2.00419	LOC_Os07g36600		universal stress protein domain containing protein, putative, expressed
CS-KGW-ind-9311-F1	OD	Chr7_16278673	7	16160938	16282504	0.0949093	0.552643	5.82154	LOC_Os07g27700		retrotransposon protein, putative, unclassified, expressed
CS-KGW-ind-9311-F1	OD	Chr1_30459103	1	30459103	30467385	0.0934072	0.622499	6.76554	LOC_Os01g53000		trehalose synthase, putative, expressed
CS-KGW-ind-9311-F1	OD	Chr6_20091972	6	20091964	20153402	0.0204019	0.610319	112.331	LOC_Os06g34680		retrotransposon protein, putative, unclassified, expressed
CS-KGW-ind-9311-F1	OD	Chr10_13894589	10	13894589	13953286	0.0971531	1.03253	11.4968	LOC_Os10g26660		expressed protein
CS-KGW-ind-9311-F1	OD	Chr4_6454390	4	6386983	6473870	0.101029	0.55255	5.77965	LOC_Os04g11800		hypothetical protein
CS-KGW-ind-9311-F1	OD	Chr10_17239582	10	17023966	17239582	0.0937943	0.610443	7.60401	LOC_Os10g32700		hypersensitive-induced response protein, putative, expressed
CS-KGW-ind-9311-F1	OD	Chr8_9966766	8	9962149	9966766	0.0546586	0.500212	14.84	LOC_Os08g16320		cytochrome P450 protein, putative, expressed
CS-KGW-ind-9311-F1	OD	Chr8_8918154	8	8914656	8922160	0.0276018	0.423524	151.761	LOC_Os08g14820		hypothetical protein
CS-KGW-ind-9311-F1	OD	Chr1_6420478	1	6388320	6436568	0.145558	0.383179	2.75164	LOC_Os01g11830		oryzain alpha chain precursor, putative, expressed
CS-KGW-ind-9311-F1	OD	Chr4_16234237	4	16152527	16281921	0.0974761	0.741001	7.62079	LOC_Os04g27540		terpene synthase, putative, expressed
CS-KGW-ind-9311-F1	OD	Chr4_4307600	4	3611070	4521705	0.0598739	0.59325	17.157	LOC_Os04g08415		expressed protein
CS-KGW-ind-9311-F1	OD	Chr4_5579090	4	5494573	5821630	0.155757	0.517175	3.43216	LOC_Os04g10330		expressed protein
CS-KGW-ind-9311-F1	OD	Chr7_16135896	7	16134174	16142150	0.131353	0.463958	3.61437	LOC_Os07g27630		expressed protein
CS-KGW-ind-9311-F1	OD	Chr10_17239582	10	17023966	17239582	0.0937943	0.610443	7.60401	LOC_Os10g32820		60S ribosomal protein L21-2, putative, expressed
CS-KGW-ind-9311-F1	OD	Chr10_17239582	10	17023966	17239582	0.0937943	0.610443	7.60401	LOC_Os10g32830		kinase, pfkB family, putative, expressed
CS-KGW-ind-9311-F1	OD	Chr8_8896159	8	8895072	8911944	0.00795403	0.39368	148.003	LOC_Os08g14790		expressed protein
CS-KGW-ind-9311-F1	OD	Chr6_7465279	6	7464839	7478568	0.24414	-0.918296	-3.76133	LOC_Os06g13540		retrotransposon protein, putative, unclassified, expressed
CS-KGW-ind-9311-F1	OD	Chr4_28653060	4	28349320	28767814	0.108919	-0.556007	-5.42039	LOC_Os04g48240		retrotransposon protein, putative, unclassified, expressed
CS-KGW-ind-9311-F1	OD	Chr2_7451049	2	7443352	7982651	0.0559585	0.554162	19.2578	LOC_Os02g13790		expressed protein
CS-KGW-ind-9311-F1	OD	Chr4_28653060	4	28349320	28767814	0.108919	-0.556007	-5.42039	LOC_Os04g48200		cytochrome P450, putative, expressed
CS-KGW-ind-9311-F1	OD	Chr7_16122006	7	16111745	16130566	0.173223	0.428213	2.53282	LOC_Os07g27610		expressed protein
CS-KGW-ind-9311-F1	OD	Chr7_16278673	7	16160938	16282504	0.0949093	0.552643	5.82154	LOC_Os07g27900		retrotransposon protein, putative, Ty1-copia subclass
CS-KGW-ind-9311-F1	OD	Chr4_705367	4	705367	730209	0.0937932	0.352105	3.79126	LOC_Os04g02160		expressed protein
CS-KGW-ind-9311-F1	OD	Chr2_7451049	2	7443352	7982651	0.0559585	0.554162	19.2578	LOC_Os02g14460		peroxidase precursor, putative, expressed
CS-KGW-ind-9311-F1	OD	Chr10_17239582	10	17023966	17239582	0.0937943	0.610443	7.60401	LOC_Os10g32880		WD domain, G-beta repeat domain containing protein, expressed
CS-KGW-ind-9311-F1	OD	Chr8_9697689	8	9379106	9748927	0.0962279	0.679293	11.3386	LOC_Os08g15870		retrotransposon protein, putative, Ty1-copia subclass, expressed
CS-KGW-ind-9311-F1	OD	Chr2_7451049	2	7443352	7982651	0.0559585	0.554162	19.2578	LOC_Os02g14280		transposon protein, putative, unclassified, expressed
CS-KGW-ind-9311-F1	OD	Chr8_9697689	8	9379106	9748927	0.0962279	0.679293	11.3386	LOC_Os08g15920		expressed protein
CS-KGW-ind-9311-F1	OD	Chr1_6420478	1	6388320	6436568	0.145558	0.383179	2.75164	LOC_Os01g11870		expressed protein
CS-KGW-ind-9311-F1	OD	Chr5_284553	5	284553	320785	0.0325283	-0.951264	-49.3847	LOC_Os05g01520		ECT protein, putative, expressed
CS-KGW-ind-9311-F1	OD	Chr2_7451049	2	7443352	7982651	0.0559585	0.554162	19.2578	LOC_Os02g13800		HSF-type DNA-binding domain containing protein, expressed
CS-KGW-ind-9311-F1	OD	Chr10_17239582	10	17023966	17239582	0.0937943	0.610443	7.60401	LOC_Os10g32649		retrotransposon protein, putative, Ty3-gypsy subclass, expressed
CS-KGW-ind-9311-F1	OD	Chr8_8630858	8	8508402	8645784	0.172179	0.44522	2.67245	LOC_Os08g14380		retrotransposon protein, putative, unclassified
CS-KGW-ind-9311-F1	OD	Chr8_8672105	8	8651827	8677480	0.0998684	0.414638	4.42913	LOC_Os08g14430		expressed protein
CS-KGW-ind-9311-F1	OD	Chr4_29035201	4	28776651	29035201	0.0103204	-1.43206	-177.52	LOC_Os04g48510		growth regulating factor protein, putative, expressed
CS-KGW-ind-9311-F1	OD	Chr5_284553	5	284553	320785	0.0325283	-0.951264	-49.3847	LOC_Os05g01500		tubulin-specific chaperone E, putative, expressed
CS-KGW-ind-9311-F1	OD	Chr2_7451049	2	7443352	7982651	0.0559585	0.554162	19.2578	LOC_Os02g14420		hypothetical protein
CS-KGW-ind-9311-F1	OD	Chr4_4307600	4	3611070	4521705	0.0598739	0.59325	17.157	LOC_Os04g08410		ELM2 domain containing protein, putative, expressed
CS-KGW-ind-9311-F1	OD	Chr4_29035201	4	28776651	29035201	0.0103204	-1.43206	-177.52	LOC_Os04g48520		ZOS4-12 - C2H2 zinc finger protein, expressed
CS-KGW-ind-9311-F1	OD	Chr7_21705210	7	21671657	21705210	0.0478525	0.593615	69.1912	LOC_Os07g36280		OsFBX241 - F-box domain containing protein, expressed
CS-KGW-ind-9311-F1	OD	Chr8_9697689	8	9379106	9748927	0.0962279	0.679293	11.3386	LOC_Os08g15860		expressed protein
CS-KGW-ind-9311-F1	OD	Chr4_705367	4	705367	730209	0.0937932	0.352105	3.79126	LOC_Os04g02150		tRNA methyltransferase, putative, expressed
CS-KGW-ind-9311-F1	OD	Chr6_20091972	6	20091964	20153402	0.0204019	0.610319	112.331	LOC_Os06g34540		expressed protein
CS-KGW-ind-9311-F1	OD	Chr4_29035201	4	28776651	29035201	0.0103204	-1.43206	-177.52	LOC_Os04g48560		retrotransposon protein, putative, unclassified, expressed
CS-KGW-ind-9311-F1	OD	Chr8_9966766	8	9962149	9966766	0.0546586	0.500212	14.84	LOC_Os08g16340		transposon protein, putative, CACTA, En/Spm sub-class, expressed
CS-KGW-ind-9311-F1	OD	Chr10_17239582	10	17023966	17239582	0.0937943	0.610443	7.60401	LOC_Os10g32710		WD domain, G-beta repeat domain containing protein, expressed
CS-KGW-ind-9311-F1	OD	Chr1_6420478	1	6388320	6436568	0.145558	0.383179	2.75164	LOC_Os01g11860		DJ-1 family protein, putative, expressed
CS-KGW-ind-9311-F1	OD	Chr4_2242668	4	1715299	2281633	0.132343	0.446732	4.32307	LOC_Os04g04660		expressed protein
CS-KGW-ind-9311-F1	OD	Chr4_14606376	4	14606370	14628466	0.176765	0.55892	3.16295	LOC_Os04g25300		transposon protein, putative, unclassified, expressed
CS-KGW-ind-9311-F1	OD	Chr4_2242668	4	1715299	2281633	0.132343	0.446732	4.32307	LOC_Os04g03810		OsSub38 - Putative Subtilisin homologue, expressed
CS-KGW-ind-9311-F1	OD	Chr1_42294191	1	42286931	42297090	0.0516714	-0.394497	-7.64377	LOC_Os01g72930		pentatricopeptide, putative, expressed
CS-KGW-ind-9311-F1	OD	Chr10_13894589	10	13894589	13953286	0.0971531	1.03253	11.4968	LOC_Os10g26650		transposon protein, putative, unclassified, expressed
CS-KGW-ind-9311-F1	OD	Chr8_8896159	8	8895072	8911944	0.00795403	0.39368	148.003	LOC_Os08g14810		NB-ARC domain containing protein, expressed
CS-KGW-ind-9311-F1	OD	Chr1_6420478	1	6388320	6436568	0.145558	0.383179	2.75164	LOC_Os01g11880		DJ-1 family protein, putative, expressed
CS-KGW-ind-9311-F1	OD	Chr7_21705210	7	21671657	21705210	0.0478525	0.593615	69.1912	LOC_Os07g36290		OsFBX242 - F-box domain containing protein, expressed
CS-KGW-ind-9311-F1	OD	Chr4_29035201	4	28776651	29035201	0.0103204	-1.43206	-177.52	LOC_Os04g48500		expressed protein
CS-KGW-ind-9311-F1	OD	Chr6_7465279	6	7464839	7478568	0.24414	-0.918296	-3.76133	LOC_Os06g13530		benzoate carboxyl methyltransferase, putative, expressed
CS-KGW-ind-9311-F1	OD	Chr4_5579090	4	5494573	5821630	0.155757	0.517175	3.43216	LOC_Os04g10420		CW7, putative, expressed
CS-KGW-ind-9311-F1	OD	Chr6_23520093	6	22278164	23520093	0.162604	0.842199	5.21397	LOC_Os06g39480		SPOC domain containing protein, putative, expressed
CS-KGW-ind-9311-F1	OD	Chr7_16278673	7	16160938	16282504	0.0949093	0.552643	5.82154	LOC_Os07g27760		expressed protein
CS-KGW-ind-9311-F1	OD	Chr8_8630858	8	8508402	8645784	0.172179	0.44522	2.67245	LOC_Os08g14330		aldose 1-epimerase, putative, expressed
CS-KGW-ind-9311-F1	OD	Chr6_23520093	6	22278164	23520093	0.162604	0.842199	5.21397	LOC_Os06g38320		expressed protein
CS-KGW-ind-9311-F1	OD	Chr5_23585498	5	23551788	23592643	0.0642693	0.457436	30.1882	LOC_Os05g40090		transposon protein, putative, unclassified, expressed
CS-KGW-ind-9311-F1	OD	Chr4_5579090	4	5494573	5821630	0.155757	0.517175	3.43216	LOC_Os04g10240		nicotiana lesion-inducing like, putative, expressed
CS-KGW-ind-9311-F1	OD	Chr8_8672105	8	8651827	8677480	0.0998684	0.414638	4.42913	LOC_Os08g14450		RNA polymerase sigma factor, putative, expressed
CS-KGW-ind-9311-F1	OD	Chr4_6454390	4	6386983	6473870	0.101029	0.55255	5.77965	LOC_Os04g11810		transferase family protein, putative, expressed
CS-KGW-ind-9311-F1	OD	Chr4_28653060	4	28349320	28767814	0.108919	-0.556007	-5.42039	LOC_Os04g48270		OsFBX148 - F-box domain containing protein, expressed
CS-KGW-ind-9311-F1	OD	Chr2_7451049	2	7443352	7982651	0.0559585	0.554162	19.2578	LOC_Os02g14160		peroxidase precursor, putative, expressed
CS-KGW-ind-9311-F1	OD	Chr7_16278673	7	16160938	16282504	0.0949093	0.552643	5.82154	LOC_Os07g27750		expressed protein
CS-KGW-ind-9311-F1	D	Chr7_21893798	7	21720744	21899380	0.127864	-0.162898	2.00419	LOC_Os07g36510		expressed protein
CS-KGW-ind-9311-F1	OD	Chr10_17239582	10	17023966	17239582	0.0937943	0.610443	7.60401	LOC_Os10g32680	FLO7	expressed protein
CS-KGW-ind-9311-F1	OD	Chr7_17337705	7	17194512	17338110	0.0209137	0.558923	38.1216	LOC_Os07g29530		expressed protein
CS-KGW-ind-9311-F1	OD	Chr1_6420478	1	6388320	6436568	0.145558	0.383179	2.75164	LOC_Os01g11820		expressed protein
CS-KGW-ind-9311-F1	OD	Chr4_5579090	4	5494573	5821630	0.155757	0.517175	3.43216	LOC_Os04g10434		amidase family protein, putative, expressed
CS-KGW-ind-9311-F1	OD	Chr9_11627614	9	11138755	11628439	0.0270826	0.440419	18.6236	LOC_Os09g19430		transposon protein, putative, CACTA, En/Spm sub-class
CS-KGW-ind-9311-F1	OD	Chr10_13894589	10	13894589	13953286	0.0971531	1.03253	11.4968	LOC_Os10g26670		expressed protein
CS-KGW-ind-9311-F1	OD	Chr8_8630858	8	8508402	8645784	0.172179	0.44522	2.67245	LOC_Os08g14270		retrotransposon protein, putative, Ty3-gypsy subclass
CS-KGW-ind-9311-F1	OD	Chr2_7451049	2	7443352	7982651	0.0559585	0.554162	19.2578	LOC_Os02g14400		retrotransposon protein, putative, Ty3-gypsy subclass
CS-KGW-ind-9311-F1	OD	Chr1_6420478	1	6388320	6436568	0.145558	0.383179	2.75164	LOC_Os01g11810		powdery mildew resistant protein 5, putative, expressed
CS-KGW-ind-9311-F1	OD	Chr7_17337705	7	17194512	17338110	0.0209137	0.558923	38.1216	LOC_Os07g29370		expressed protein
CS-KGW-ind-9311-F1	OD	Chr1_430850	1	430850	437023	0.157006	-0.554909	-3.57542	LOC_Os01g01830		OsPOP1 - Putative Prolyl Oligopeptidase homologue, expressed
CS-KGW-ind-9311-F1	OD	Chr6_23520093	6	22278164	23520093	0.162604	0.842199	5.21397	LOC_Os06g39624		transposon protein, putative, Pong sub-class, expressed
CS-KGW-ind-9311-F1	OD	Chr4_4307600	4	3611070	4521705	0.0598739	0.59325	17.157	LOC_Os04g08070		expressed protein
CS-KGW-ind-9311-F1	OD	Chr4_16234237	4	16152527	16281921	0.0974761	0.741001	7.62079	LOC_Os04g27530		expressed protein
CS-KGW-ind-9311-F1	OD	Chr7_6703093	7	6703093	6708715	0.127397	0.509507	4.1496	LOC_Os07g12020		retrotransposon protein, putative, unclassified, expressed
CS-KGW-ind-9311-F1	OD	Chr10_17239582	10	17023966	17239582	0.0937943	0.610443	7.60401	LOC_Os10g32620		expressed protein
CS-KGW-ind-9311-F1	OD	Chr5_23585498	5	23551788	23592643	0.0642693	0.457436	30.1882	LOC_Os05g40080		WRKY54, expressed
CS-KGW-ind-9311-F1	OD	Chr8_8477783	8	8477783	8485766	0.145679	0.383413	3.53042	LOC_Os08g14195		expressed protein
CS-KGW-ind-9311-F1	OD	Chr4_28653060	4	28349320	28767814	0.108919	-0.556007	-5.42039	LOC_Os04g48280		expressed protein
CS-KGW-ind-9311-F1	OD	Chr1_6108296	1	5923489	6150531	0.0521246	0.750298	15.3326	LOC_Os01g11110		14-3-3 protein, putative, expressed
CS-KGW-ind-9311-F1	OD	Chr8_8630858	8	8508402	8645784	0.172179	0.44522	2.67245	LOC_Os08g14410		expressed protein
CS-KGW-ind-9311-F1	OD	Chr4_29035201	4	28776651	29035201	0.0103204	-1.43206	-177.52	LOC_Os04g48550		retrotransposon protein, putative, unclassified, expressed
CS-KGW-ind-9311-F1	OD	Chr4_16234237	4	16152527	16281921	0.0974761	0.741001	7.62079	LOC_Os04g27340		terpene synthase, putative, expressed
CS-KGW-ind-9311-F1	OD	Chr8_9697689	8	9379106	9748927	0.0962279	0.679293	11.3386	LOC_Os08g15980		expressed protein
CS-KGW-ind-9311-F1	OD	Chr1_6420478	1	6388320	6436568	0.145558	0.383179	2.75164	LOC_Os01g11850		expressed protein
CS-KGW-ind-9311-F1	OD	Chr10_17239582	10	17023966	17239582	0.0937943	0.610443	7.60401	LOC_Os10g32690		expressed protein
CS-KGW-ind-9311-F1	OD	Chr8_8630858	8	8508402	8645784	0.172179	0.44522	2.67245	LOC_Os08g14370		retrotransposon protein, putative, unclassified
CS-KGW-ind-9311-F1	OD	Chr2_7451049	2	7443352	7982651	0.0559585	0.554162	19.2578	LOC_Os02g13810		DNA binding protein, putative, expressed
CS-KGW-ind-9311-F1	D	Chr7_21893798	7	21720744	21899380	0.127864	-0.162898	2.00419	LOC_Os07g36360		OsFBO19 - F-box and other domain containing protein, expressed
CS-KGW-ind-9311-F1	OD	Chr8_9697689	8	9379106	9748927	0.0962279	0.679293	11.3386	LOC_Os08g15890		hypothetical protein
CS-KGW-ind-9311-F1	OD	Chr5_284553	5	284553	320785	0.0325283	-0.951264	-49.3847	LOC_Os05g01540		serine/arginine repetitive matrix protein 1, putative, expressed
CS-KGW-ind-9311-F1	OD	Chr7_16122006	7	16111745	16130566	0.173223	0.428213	2.53282	LOC_Os07g27590		retrotransposon protein, putative, unclassified, expressed
CS-KGW-ind-9311-F1	OD	Chr10_17239582	10	17023966	17239582	0.0937943	0.610443	7.60401	LOC_Os10g32840		enzyme of the cupin superfamily protein, putative, expressed
CS-KGW-ind-9311-F1	OD	Chr5_23585498	5	23551788	23592643	0.0642693	0.457436	30.1882	LOC_Os05g40150		RGH2B, putative, expressed
CS-KGW-ind-9311-F1	OD	Chr4_29035201	4	28776651	29035201	0.0103204	-1.43206	-177.52	LOC_Os04g48700		TruB family pseudouridylate synthase, putative, expressed
CS-KGW-ind-9311-F1	OD	Chr1_6368723	1	6366037	6382637	0.148199	0.396419	2.77721	LOC_Os01g11770		expressed protein
CS-KGW-ind-9311-F1	OD	Chr7_16278673	7	16160938	16282504	0.0949093	0.552643	5.82154	LOC_Os07g27740		retrotransposon protein, putative, Ty3-gypsy subclass, expressed
CS-KGW-ind-9311-F1	OD	Chr1_6368723	1	6366037	6382637	0.148199	0.396419	2.77721	LOC_Os01g11790		GDSL-like lipase/acylhydrolase, putative, expressed
CS-KGW-ind-9311-F1	OD	Chr7_16278673	7	16160938	16282504	0.0949093	0.552643	5.82154	LOC_Os07g27920		hypothetical protein
CS-KGW-ind-9311-F1	OD	Chr8_8672105	8	8651827	8677480	0.0998684	0.414638	4.42913	LOC_Os08g14440		uridylyltransferase-related, putative, expressed
CS-KGW-ind-9311-F1	OD	Chr4_5579090	4	5494573	5821630	0.155757	0.517175	3.43216	LOC_Os04g10700		retrotransposon protein, putative, unclassified, expressed
CS-KGW-ind-9311-F1	OD	Chr9_11627614	9	11138755	11628439	0.0270826	0.440419	18.6236	LOC_Os09g18410		retrotransposon protein, putative, Ty3-gypsy subclass, expressed
CS-KGW-ind-9311-F1	OD	Chr2_7451049	2	7443352	7982651	0.0559585	0.554162	19.2578	LOC_Os02g14410		retrotransposon protein, putative, Ty3-gypsy subclass, expressed
CS-KGW-ind-9311-F1	OD	Chr8_8672105	8	8651827	8677480	0.0998684	0.414638	4.42913	LOC_Os08g14420		expressed protein
CS-KGW-ind-9311-F1	OD	Chr4_4307600	4	3611070	4521705	0.0598739	0.59325	17.157	LOC_Os04g08320		YIF1B, putative, expressed
CS-KGW-ind-9311-F1	OD	Chr4_4307600	4	3611070	4521705	0.0598739	0.59325	17.157	LOC_Os04g06850		expressed protein
CS-KGW-ind-9311-F1	OD	Chr5_284553	5	284553	320785	0.0325283	-0.951264	-49.3847	LOC_Os05g01530		expressed protein
CS-KGW-ind-9311-F1	D	Chr7_21893798	7	21720744	21899380	0.127864	-0.162898	2.00419	LOC_Os07g36400		expressed protein
CS-KGW-ind-9311-F1	OD	Chr10_17239582	10	17023966	17239582	0.0937943	0.610443	7.60401	LOC_Os10g32570		tRNA synthetase class I family protein, putative, expressed
CS-KGW-ind-9311-F1	OD	Chr1_430850	1	430850	437023	0.157006	-0.554909	-3.57542	LOC_Os01g01800		expressed protein
CS-KGW-ind-9311-F1	OD	Chr1_6108296	1	5923489	6150531	0.0521246	0.750298	15.3326	LOC_Os01g11150		gibberellin 2-beta-dioxygenase, putative, expressed
CS-KGW-ind-9311-F1	OD	Chr5_284553	5	284553	320785	0.0325283	-0.951264	-49.3847	LOC_Os05g01480		ras-related protein, putative, expressed
CS-KGW-ind-9311-F1	OD	Chr4_16234237	4	16152527	16281921	0.0974761	0.741001	7.62079	LOC_Os04g27460		expressed protein
CS-KGW-ind-9311-F1	OD	Chr7_21705210	7	21671657	21705210	0.0478525	0.593615	69.1912	LOC_Os07g36250		peptide chain release factor protein, putative, expressed
CS-KGW-ind-9311-F1	OD	Chr4_28653060	4	28349320	28767814	0.108919	-0.556007	-5.42039	LOC_Os04g48250		expressed protein
CS-KGW-ind-9311-F1	OD	Chr8_8630858	8	8508402	8645784	0.172179	0.44522	2.67245	LOC_Os08g14230		villin, putative, expressed
CS-KGW-ind-9311-F1	OD	Chr10_17239582	10	17023966	17239582	0.0937943	0.610443	7.60401	LOC_Os10g32810		beta-amylase, putative, expressed
CS-KGW-ind-9311-F1	OD	Chr4_5579090	4	5494573	5821630	0.155757	0.517175	3.43216	LOC_Os04g10200		retrotransposon protein, putative, Ty3-gypsy subclass, expressed
CS-KGW-ind-9311-F1	OD	Chr4_28653060	4	28349320	28767814	0.108919	-0.556007	-5.42039	LOC_Os04g48180		expressed protein
CS-KGW-ind-9311-F1	OD	Chr9_11627614	9	11138755	11628439	0.0270826	0.440419	18.6236	LOC_Os09g18159		light repressible receptor protein kinase, putative, expressed
CS-KGW-ind-9311-F1	OD	Chr5_23585498	5	23551788	23592643	0.0642693	0.457436	30.1882	LOC_Os05g40100		retrotransposon protein, putative, unclassified
CS-KGW-ind-9311-F1	OD	Chr10_17239582	10	17023966	17239582	0.0937943	0.610443	7.60401	LOC_Os10g32900		CCT motif family protein, expressed
CS-KGW-ind-9311-F1	OD	Chr4_28653060	4	28349320	28767814	0.108919	-0.556007	-5.42039	LOC_Os04g48040		expressed protein
CS-KGW-ind-9311-F1	OD	Chr1_6368723	1	6366037	6382637	0.148199	0.396419	2.77721	LOC_Os01g11780		expressed protein
CS-KGW-ind-9311-F1	OD	Chr8_9697689	8	9379106	9748927	0.0962279	0.679293	11.3386	LOC_Os08g16000		retrotransposon protein, putative, Ty3-gypsy subclass, expressed
CS-KGW-ind-9311-F1	OD	Chr4_4307600	4	3611070	4521705	0.0598739	0.59325	17.157	LOC_Os04g08290		ZOS4-04 - C2H2 zinc finger protein, expressed
CS-KGW-ind-9311-F1	OD	Chr2_7451049	2	7443352	7982651	0.0559585	0.554162	19.2578	LOC_Os02g14470		hypothetical protein
CS-KGW-ind-9311-F1	OD	Chr7_16278673	7	16160938	16282504	0.0949093	0.552643	5.82154	LOC_Os07g27910		retrotransposon protein, putative, Ty1-copia subclass
CS-KGW-ind-9311-HV	OD	Chr1_12855611	1	12742169	14436721	0.0479901	-0.272452	-6.63272	LOC_Os01g23590		suppressor of Mek, putative, expressed
CS-KGW-ind-9311-HV	OD	Chr3_10269243	3	10159667	10297916	0.128301	0.514378	4.38664	LOC_Os03g18190		importin subunit beta, putative, expressed
CS-KGW-ind-9311-HV	OD	Chr9_11828156	9	11321601	11838078	0.0828401	0.543682	9.96336	LOC_Os09g19440		conserved hypothetical protein
CS-KGW-ind-9311-HV	OD	Chr3_28670644	3	28546600	28875714	0.0865863	0.397934	6.40633	LOC_Os03g50364		expressed protein
CS-KGW-ind-9311-HV	OD	Chr1_5774284	1	5706276	5774284	0.0726718	0.307351	4.2366	LOC_Os01g10680		GIL1, putative, expressed
CS-KGW-ind-9311-HV	OD	Chr5_16850097	5	16804990	16853527	0.0449239	0.459295	10.9085	LOC_Os05g28680		retrotransposon protein, putative, unclassified, expressed
CS-KGW-ind-9311-HV	OD	Chr1_5928007	1	5889879	5936985	0.0862971	0.199425	2.68934	LOC_Os01g11110		14-3-3 protein, putative, expressed
CS-KGW-ind-9311-HV	OD	Chr1_6204310	1	6002948	6410676	0.0462723	0.673073	65.5307	LOC_Os01g11370		ATP-dependent RNA helicase, putative, expressed
CS-KGW-ind-9311-HV	OD	Chr7_8709680	7	8533959	8710399	0.190456	0.347087	2.24494	LOC_Os07g15110		retrotransposon protein, putative, unclassified, expressed
CS-KGW-ind-9311-HV	OD	Chr3_10269243	3	10159667	10297916	0.128301	0.514378	4.38664	LOC_Os03g18180		ranBP1 domain containing protein, expressed
CS-KGW-ind-9311-HV	OD	Chr3_28670644	3	28546600	28875714	0.0865863	0.397934	6.40633	LOC_Os03g50180		retrotransposon protein, putative, unclassified, expressed
CS-KGW-ind-9311-HV	OD	Chr3_10269243	3	10159667	10297916	0.128301	0.514378	4.38664	LOC_Os03g18370		MRH1, putative, expressed
CS-KGW-ind-9311-HV	OD	Chr1_7074452	1	7072718	7812972	0.0281772	-0.485405	-31.7364	LOC_Os01g12770		cytochrome P450, putative, expressed
CS-KGW-ind-9311-HV	OD	Chr1_7074452	1	7072718	7812972	0.0281772	-0.485405	-31.7364	LOC_Os01g12790		receptor protein kinase, putative, expressed
CS-KGW-ind-9311-HV	OD	Chr5_16850097	5	16804990	16853527	0.0449239	0.459295	10.9085	LOC_Os05g28650		expressed protein
CS-KGW-ind-9311-HV	OD	Chr1_31107839	1	31107839	31233641	0.0747211	0.442313	27.5875	LOC_Os01g54290		retrotransposon protein, putative, unclassified, expressed
CS-KGW-ind-9311-HV	OD	Chr3_28670644	3	28546600	28875714	0.0865863	0.397934	6.40633	LOC_Os03g50350		coatomer alpha subunit, putative, expressed
CS-KGW-ind-9311-HV	OD	Chr7_21509988	7	21473331	21513492	0.125103	0.500363	4.01218	LOC_Os07g35960		expressed protein
CS-KGW-ind-9311-HV	OD	Chr5_23238504	5	23112589	23238504	0.0161803	0.367077	31.1371	LOC_Os05g39510		hypothetical protein
CS-KGW-ind-9311-HV	OD	Chr9_11828156	9	11321601	11838078	0.0828401	0.543682	9.96336	LOC_Os09g19430		transposon protein, putative, CACTA, En/Spm sub-class
CS-KGW-ind-9311-HV	OD	Chr5_23238504	5	23112589	23238504	0.0161803	0.367077	31.1371	LOC_Os05g39530		ribonuclease P family protein, putative, expressed
CS-KGW-ind-9311-HV	OD	Chr1_7074452	1	7072718	7812972	0.0281772	-0.485405	-31.7364	LOC_Os01g12780		expressed protein
CS-KGW-ind-9311-HV	OD	Chr7_21509988	7	21473331	21513492	0.125103	0.500363	4.01218	LOC_Os07g35950		expressed protein
CS-KGW-ind-9311-HV	OD	Chr7_21709059	7	21674525	21723154	0.0294222	0.521435	35.7494	LOC_Os07g36320		OsFBX244 - F-box domain containing protein, expressed
CS-KGW-ind-9311-HV	OD	Chr3_10269243	3	10159667	10297916	0.128301	0.514378	4.38664	LOC_Os03g18150		protein phosphatase 2C, putative, expressed
CS-KGW-ind-9311-HV	OD	Chr1_6204310	1	6002948	6410676	0.0462723	0.673073	65.5307	LOC_Os01g11770		expressed protein
CS-KGW-ind-9311-HV	OD	Chr12_15471417	12	14155169	15476550	0.0480512	0.167191	0.624485	LOC_Os12g26480		expressed protein
CS-KGW-ind-9311-HV	OD	Chr9_10525328	9	10379568	10756944	0.0645995	0.377086	12.5507	LOC_Os09g17580		expressed protein
CS-KGW-ind-9311-HV	OD	Chr3_10269243	3	10159667	10297916	0.128301	0.514378	4.38664	LOC_Os03g18170		STE_MEKK_ste11_MAP3K.13 - STE kinases include homologs to sterile 7, sterile 11 and sterile 20 from yeast, expressed
CS-KGW-ind-9311-HV	OD	Chr1_6204310	1	6002948	6410676	0.0462723	0.673073	65.5307	LOC_Os01g11220		hydrolase, acting on carbon-nitrogen, putative, expressed
CS-KGW-ind-9311-HV	OD	Chr1_5774284	1	5706276	5774284	0.0726718	0.307351	4.2366	LOC_Os01g10690		POLD3 - Putative DNA polymerase delta complex subunit, expressed
CS-KGW-ind-9311-HV	OD	Chr8_509317	8	496639	511140	0.0795839	-0.195448	-3.34712	LOC_Os08g01830		TKL_IRAK_CR4L.6 - The CR4L subfamily has homology with Crinkly4, expressed
CS-KGW-ind-9311-HV	OD	Chr7_8709680	7	8533959	8710399	0.190456	0.347087	2.24494	LOC_Os07g14950		retrotransposon protein, putative, unclassified
CS-KGW-ind-9311-HV	OD	Chr1_5980147	1	5962593	5991543	0.0576621	0.23749	5.59367	LOC_Os01g11170		expressed protein
CS-KGW-ind-9311-HV	OD	Chr3_10269243	3	10159667	10297916	0.128301	0.514378	4.38664	LOC_Os03g18230		expressed protein
CS-KGW-ind-9311-HV	OD	Chr1_6204310	1	6002948	6410676	0.0462723	0.673073	65.5307	LOC_Os01g11850		expressed protein
CS-KGW-ind-9311-HV	OD	Chr3_10269243	3	10159667	10297916	0.128301	0.514378	4.38664	LOC_Os03g18260		expressed protein
CS-KGW-ind-9311-HV	OD	Chr9_10525328	9	10379568	10756944	0.0645995	0.377086	12.5507	LOC_Os09g17550		hypothetical protein
CS-KGW-ind-9311-HV	OD	Chr1_6204310	1	6002948	6410676	0.0462723	0.673073	65.5307	LOC_Os01g11210		expressed protein
CS-KGW-ind-9311-HV	OD	Chr3_28670644	3	28546600	28875714	0.0865863	0.397934	6.40633	LOC_Os03g50430		zinc finger family protein, putative, expressed
CS-KGW-ind-9311-HV	OD	Chr3_28670644	3	28546600	28875714	0.0865863	0.397934	6.40633	LOC_Os03g50380		DNA-directed RNA polymerase I subunit RPA12, putative, expressed
CS-KGW-ind-9311-HV	OD	Chr11_21176370	11	21052674	21176370	0.0232085	-0.216779	-15.9288	LOC_Os11g35890		leucine rich repeat protein, putative, expressed
CS-KGW-ind-9311-HV	OD	Chr1_6204310	1	6002948	6410676	0.0462723	0.673073	65.5307	LOC_Os01g11240		DUF538 domain containing protein, putative, expressed
CS-KGW-ind-9311-HV	OD	Chr3_28670644	3	28546600	28875714	0.0865863	0.397934	6.40633	LOC_Os03g50325		phosphatidylinositol 4-kinase, putative, expressed
CS-KGW-ind-9311-HV	OD	Chr3_10269243	3	10159667	10297916	0.128301	0.514378	4.38664	LOC_Os03g18210		basic helix-loop-helix, putative, expressed
CS-KGW-ind-9311-HV	OD	Chr9_11828156	9	11321601	11838078	0.0828401	0.543682	9.96336	LOC_Os09g19480		retrotransposon, putative, centromere-specific
CS-KGW-ind-9311-HV	OD	Chr1_5928007	1	5889879	5936985	0.0862971	0.199425	2.68934	LOC_Os01g11054		phosphoenolpyruvate carboxylase, putative, expressed
CS-KGW-ind-9311-HV	OD	Chr1_5980147	1	5962593	5991543	0.0576621	0.23749	5.59367	LOC_Os01g11150		gibberellin 2-beta-dioxygenase, putative, expressed
CS-KGW-ind-9311-HV	OD	Chr5_16850097	5	16804990	16853527	0.0449239	0.459295	10.9085	LOC_Os05g28660		retrotransposon protein, putative, unclassified, expressed
CS-KGW-ind-9311-HV	OD	Chr1_7074452	1	7072718	7812972	0.0281772	-0.485405	-31.7364	LOC_Os01g13170		ubiquitin-conjugating enzyme E2, putative, expressed
CS-KGW-ind-9311-HV	OD	Chr1_6204310	1	6002948	6410676	0.0462723	0.673073	65.5307	LOC_Os01g11350		bZIP transcription factor domain containing protein, expressed
CS-KGW-ind-9311-HV	OD	Chr5_16850097	5	16804990	16853527	0.0449239	0.459295	10.9085	LOC_Os05g28670		retrotransposon protein, putative, unclassified, expressed
CS-KGW-ind-9311-HV	OD	Chr5_23238504	5	23112589	23238504	0.0161803	0.367077	31.1371	LOC_Os05g39560		metal cation transporter, putative, expressed
CS-KGW-ind-9311-HV	OD	Chr1_12855611	1	12742169	14436721	0.0479901	-0.272452	-6.63272	LOC_Os01g24080		expressed protein
CS-KGW-ind-9311-HV	OD	Chr9_11828156	9	11321601	11838078	0.0828401	0.543682	9.96336	LOC_Os09g19670		retrotransposon protein, putative, unclassified, expressed
CS-KGW-ind-9311-HV	OD	Chr1_5928007	1	5889879	5936985	0.0862971	0.199425	2.68934	LOC_Os01g11070		Alg9-like mannosyltransferase protein, putative, expressed
CS-KGW-ind-9311-HV	OD	Chr7_21709059	7	21674525	21723154	0.0294222	0.521435	35.7494	LOC_Os07g36310		hypothetical protein
CS-KGW-ind-9311-HV	OD	Chr1_12855611	1	12742169	14436721	0.0479901	-0.272452	-6.63272	LOC_Os01g22780		GDSL-like lipase/acylhydrolase, putative, expressed
CS-KGW-ind-9311-HV	OD	Chr7_21709059	7	21674525	21723154	0.0294222	0.521435	35.7494	LOC_Os07g36300		OsFBX243 - F-box domain containing protein, expressed
CS-KGW-ind-9311-HV	OD	Chr11_23109112	11	23053731	23109114	0.0375366	-0.393222	-31.7873	LOC_Os11g38840		expressed protein
CS-KGW-ind-9311-HV	D	Chr2_20754512	2	20603802	26002136	0.229322	-0.334046	-1.41288	LOC_Os02g34610		expressed protein
CS-KGW-ind-9311-HV	OD	Chr11_23109112	11	23053731	23109114	0.0375366	-0.393222	-31.7873	LOC_Os11g38765		expressed protein
CS-KGW-ind-9311-HV	OD	Chr1_12855611	1	12742169	14436721	0.0479901	-0.272452	-6.63272	LOC_Os01g24550		fruit bromelain precursor, putative, expressed
CS-KGW-ind-9311-HV	OD	Chr9_11828156	9	11321601	11838078	0.0828401	0.543682	9.96336	LOC_Os09g19136		expressed protein
CS-KGW-ind-9311-HV	OD	Chr3_28670644	3	28546600	28875714	0.0865863	0.397934	6.40633	LOC_Os03g50300		CASP, putative, expressed
CS-KGW-ind-9311-HV	OD	Chr1_12855611	1	12742169	14436721	0.0479901	-0.272452	-6.63272	LOC_Os01g25450		AIG1 family protein, expressed
CS-KGW-ind-9311-HV	OD	Chr3_10269243	3	10159667	10297916	0.128301	0.514378	4.38664	LOC_Os03g18160		mitochondrial carrier protein, putative, expressed
CS-KGW-ind-9311-HV	OD	Chr9_10525328	9	10379568	10756944	0.0645995	0.377086	12.5507	LOC_Os09g16980		OsWAK86 - OsWAK pseudogene, expressed
CS-KGW-ind-9311-HV	OD	Chr9_10525328	9	10379568	10756944	0.0645995	0.377086	12.5507	LOC_Os09g17110		retrotransposon protein, putative, Ty1-copia subclass, expressed
CS-KGW-ind-9311-HV	OD	Chr9_11828156	9	11321601	11838078	0.0828401	0.543682	9.96336	LOC_Os09g19640		holocarboxylase synthetase, putative, expressed
CS-KGW-ind-9311-HV	OD	Chr1_6204310	1	6002948	6410676	0.0462723	0.673073	65.5307	LOC_Os01g11780		expressed protein
CS-KGW-ind-9311-HV	OD	Chr6_25118984	6	25102844	25153208	0.0574621	0.17946	3.32459	LOC_Os06g41880		OsSub51 - Putative Subtilisin homologue, expressed
CS-KGW-ind-9311-HV	OD	Chr11_21176370	11	21052674	21176370	0.0232085	-0.216779	-15.9288	LOC_Os11g35960		Leucine rich repeat N-terminal domain containing protein, putative, expressed
CS-KGW-ind-9311-HV	OD	Chr1_6204310	1	6002948	6410676	0.0462723	0.673073	65.5307	LOC_Os01g11260		phospho-N-acetylmuramoyl-pentapeptide-transferase, putative, expressed
CS-KGW-ind-9311-HV	OD	Chr1_6204310	1	6002948	6410676	0.0462723	0.673073	65.5307	LOC_Os01g11360		expressed protein
CS-KGW-ind-9311-HV	OD	Chr3_28670644	3	28546600	28875714	0.0865863	0.397934	6.40633	LOC_Os03g50450		inactive receptor kinase At2g26730 precursor, putative, expressed
CS-KGW-ind-9311-HV	OD	Chr1_6204310	1	6002948	6410676	0.0462723	0.673073	65.5307	LOC_Os01g11490		zinc finger, C3HC4 type domain containing protein, expressed
CS-KGW-ind-9311-HV	OD	Chr3_28670644	3	28546600	28875714	0.0865863	0.397934	6.40633	LOC_Os03g50390		AGC_AGC_other_GWLd.2 - ACG kinases include homologs to PKA, PKG and PKC, expressed
CS-KGW-ind-9311-HV	OD	Chr1_6204310	1	6002948	6410676	0.0462723	0.673073	65.5307	LOC_Os01g11760		GDSL-like lipase/acylhydrolase, putative, expressed
CS-KGW-ind-9311-HV	OD	Chr7_21709059	7	21674525	21723154	0.0294222	0.521435	35.7494	LOC_Os07g36270		retrotransposon protein, putative, Ty1-copia subclass, expressed
CS-KGW-ind-9311-HV	OD	Chr5_16850097	5	16804990	16853527	0.0449239	0.459295	10.9085	LOC_Os05g28730		zinc finger, C3HC4 type domain containing protein, expressed
CS-KGW-ind-9311-HV	OD	Chr9_11828156	9	11321601	11838078	0.0828401	0.543682	9.96336	LOC_Os09g19470		retrotransposon protein, putative, unclassified
CS-KGW-ind-9311-HV	OD	Chr3_10269243	3	10159667	10297916	0.128301	0.514378	4.38664	LOC_Os03g18310		6PF-2-K/Fru-2,6-P2ASE liver isozyme, putative, expressed
CS-KGW-ind-9311-HV	OD	Chr1_7074452	1	7072718	7812972	0.0281772	-0.485405	-31.7364	LOC_Os01g13940		expressed protein
CS-KGW-ind-9311-HV	OD	Chr1_5774284	1	5706276	5774284	0.0726718	0.307351	4.2366	LOC_Os01g10840		CGMC_GSK.2 - CGMC includes CDA, MAPK, GSK3, and CLKC kinases, expressed
CS-KGW-ind-9311-HV	OD	Chr9_11828156	9	11321601	11838078	0.0828401	0.543682	9.96336	LOC_Os09g19750		expressed protein
CS-KGW-ind-9311-HV	OD	Chr1_6204310	1	6002948	6410676	0.0462723	0.673073	65.5307	LOC_Os01g11250		potassium channel KAT1, putative, expressed
CS-KGW-ind-9311-HV	OD	Chr1_6204310	1	6002948	6410676	0.0462723	0.673073	65.5307	LOC_Os01g11340		cytochrome P450, putative, expressed
CS-KGW-ind-9311-HV	OD	Chr3_10269243	3	10159667	10297916	0.128301	0.514378	4.38664	LOC_Os03g18220		pyruvate decarboxylase isozyme 2, putative, expressed
CS-KGW-ind-9311-HV	OD	Chr3_28670644	3	28546600	28875714	0.0865863	0.397934	6.40633	LOC_Os03g50040		phytanoyl-CoA dioxygenase, putative, expressed
CS-KGW-ind-9311-HV	OD	Chr1_5774284	1	5706276	5774284	0.0726718	0.307351	4.2366	LOC_Os01g10830		carnitine racemase like protein, putative, expressed
CS-KGW-ind-9311-HV	OD	Chr1_5928007	1	5889879	5936985	0.0862971	0.199425	2.68934	LOC_Os01g11040	TUT1; ES1; OsSCAR1	SCAR-like protein 2, putative, expressed
CS-KGW-ind-9311-HV	OD	Chr3_28670644	3	28546600	28875714	0.0865863	0.397934	6.40633	LOC_Os03g50470		expressed protein
CS-KGW-ind-9311-HV	OD	Chr7_8709680	7	8533959	8710399	0.190456	0.347087	2.24494	LOC_Os07g14920		expressed protein
CS-KGW-ind-9311-HV	OD	Chr9_10525328	9	10379568	10756944	0.0645995	0.377086	12.5507	LOC_Os09g17130		expressed protein
CS-KGW-ind-9311-HV	A	Chr6_21749909	6	21749909	21749924	0.235356	0.0247026	0.104692	LOC_Os06g36910		pentatricopeptide, putative, expressed
CS-KGW-ind-9311-HV	OD	Chr3_28670644	3	28546600	28875714	0.0865863	0.397934	6.40633	LOC_Os03g50310		CCT/B-box zinc finger protein, putative, expressed
CS-KGW-ind-9311-HV	OD	Chr3_28670644	3	28546600	28875714	0.0865863	0.397934	6.40633	LOC_Os03g50290		14-3-3 protein, putative, expressed
CS-KGW-ind-9311-HV	OD	Chr11_21176370	11	21052674	21176370	0.0232085	-0.216779	-15.9288	LOC_Os11g35880		transposon protein, putative, unclassified, expressed
CS-KGW-ind-9311-HV	OD	Chr3_28670644	3	28546600	28875714	0.0865863	0.397934	6.40633	LOC_Os03g50570		expressed protein
CS-KGW-ind-9311-HV	OD	Chr11_21176370	11	21052674	21176370	0.0232085	-0.216779	-15.9288	LOC_Os11g35970		retrotransposon protein, putative, unclassified, expressed
CS-KGW-ind-9311-HV	OD	Chr3_28670644	3	28546600	28875714	0.0865863	0.397934	6.40633	LOC_Os03g50340		coatomer alpha subunit, putative, expressed
CS-KGW-ind-9311-HV	OD	Chr11_21176370	11	21052674	21176370	0.0232085	-0.216779	-15.9288	LOC_Os11g35910		retrotransposon protein, putative, Ty3-gypsy subclass, expressed
CS-KGW-ind-9311-HV	OD	Chr9_11828156	9	11321601	11838078	0.0828401	0.543682	9.96336	LOC_Os09g18470		oxidoreductase, 2OG-Fe oxygenase family protein, putative, expressed
CS-KGW-ind-9311-HV	OD	Chr5_23238504	5	23112589	23238504	0.0161803	0.367077	31.1371	LOC_Os05g39400		expressed protein
CS-KGW-ind-9311-HV	OD	Chr11_21176370	11	21052674	21176370	0.0232085	-0.216779	-15.9288	LOC_Os11g36020		leucine rich repeat protein, putative, expressed
CS-KGW-ind-9311-HV	OD	Chr2_28685994	2	28636656	28688325	0.120722	0.268173	2.22074	LOC_Os02g46980		pentatricopeptide, putative, expressed
CS-KGW-ind-9311-HV	OD	Chr1_6204310	1	6002948	6410676	0.0462723	0.673073	65.5307	LOC_Os01g11430		expressed protein
CS-KGW-ind-9311-HV	OD	Chr1_5980147	1	5962593	5991543	0.0576621	0.23749	5.59367	LOC_Os01g11140		retrotransposon protein, putative, unclassified, expressed
CS-KGW-ind-9311-HV	OD	Chr1_5928007	1	5889879	5936985	0.0862971	0.199425	2.68934	LOC_Os01g11120		CID11, putative, expressed
CS-KGW-ind-9311-HV	OD	Chr1_6204310	1	6002948	6410676	0.0462723	0.673073	65.5307	LOC_Os01g11200		transforming protein myb, putative, expressed
CS-KGW-ind-9311-HV	OD	Chr9_10525328	9	10379568	10756944	0.0645995	0.377086	12.5507	LOC_Os09g17570		expressed protein
CS-KGW-ind-9311-HV	OD	Chr3_28670644	3	28546600	28875714	0.0865863	0.397934	6.40633	LOC_Os03g50440		ubiquitin-conjugating enzyme, putative, expressed
CS-KGW-ind-9311-HV	OD	Chr1_31107839	1	31107839	31233641	0.0747211	0.442313	27.5875	LOC_Os01g54090		expressed protein
CS-KGW-ind-9311-HV	OD	Chr9_10525328	9	10379568	10756944	0.0645995	0.377086	12.5507	LOC_Os09g17120		ankyrin repeat domain containing protein, expressed
CS-KGW-ind-9311-HV	OD	Chr12_15471417	12	14155169	15476550	0.0480512	0.167191	0.624485	LOC_Os12g25690		UDP-glucose 6-dehydrogenase, putative, expressed
CS-KGW-ind-9311-HV	OD	Chr3_28670644	3	28546600	28875714	0.0865863	0.397934	6.40633	LOC_Os03g50030		phospholipase A2, putative, expressed
CS-KGW-ind-9311-HV	OD	Chr1_12855611	1	12742169	14436721	0.0479901	-0.272452	-6.63272	LOC_Os01g22850		retrotransposon protein, putative, Ty3-gypsy subclass
CS-KGW-ind-9311-HV	OD	Chr11_1159439	11	1151477	1159439	0.260486	0.846953	3.3402	LOC_Os11g03190		expressed protein
CS-KGW-ind-9311-HV	OD	Chr1_6204310	1	6002948	6410676	0.0462723	0.673073	65.5307	LOC_Os01g11270		cytochrome P450, putative, expressed
CS-KGW-ind-9311-HV	OD	Chr7_21709059	7	21674525	21723154	0.0294222	0.521435	35.7494	LOC_Os07g36260		transposon protein, putative, Pong sub-class, expressed
CS-KGW-ind-9311-HV	OD	Chr3_28670644	3	28546600	28875714	0.0865863	0.397934	6.40633	LOC_Os03g50480		phosphoglucomutase, putative, expressed
CS-KGW-ind-9311-HV	OD	Chr11_1159439	11	1151477	1159439	0.260486	0.846953	3.3402	LOC_Os11g03180		expressed protein
CS-KGW-ind-9311-HV	OD	Chr2_28685994	2	28636656	28688325	0.120722	0.268173	2.22074	LOC_Os02g46990		AAA-type ATPase family protein, putative, expressed
CS-KGW-ind-9311-HV	OD	Chr9_11828156	9	11321601	11838078	0.0828401	0.543682	9.96336	LOC_Os09g19780		expressed protein
CS-KGW-ind-9311-HV	OD	Chr1_12855611	1	12742169	14436721	0.0479901	-0.272452	-6.63272	LOC_Os01g22720		expressed protein
CS-KGW-ind-9311-HV	OD	Chr11_21176370	11	21052674	21176370	0.0232085	-0.216779	-15.9288	LOC_Os11g35870		RWD domain containing protein, expressed
CS-KGW-ind-9311-HV	OD	Chr5_16850097	5	16804990	16853527	0.0449239	0.459295	10.9085	LOC_Os05g28720		PPR repeat containing protein, expressed
CS-KGW-ind-9311-HV	OD	Chr1_12855611	1	12742169	14436721	0.0479901	-0.272452	-6.63272	LOC_Os01g22660		GDSL-like lipase/acylhydrolase, putative, expressed
CS-KGW-ind-9311-HV	OD	Chr1_12855611	1	12742169	14436721	0.0479901	-0.272452	-6.63272	LOC_Os01g24030		AMP-binding enzyme, putative, expressed
CS-KGW-ind-9311-HV	OD	Chr9_10525328	9	10379568	10756944	0.0645995	0.377086	12.5507	LOC_Os09g17152		OsFBX319 - F-box domain containing protein, expressed
CS-KGW-ind-9311-HV	OD	Chr3_28670644	3	28546600	28875714	0.0865863	0.397934	6.40633	LOC_Os03g50220		homologous-pairing protein meu13, putative, expressed
CS-KGW-ind-9311-HV	OD	Chr6_25118984	6	25102844	25153208	0.0574621	0.17946	3.32459	LOC_Os06g41870		expressed protein
CS-KGW-ind-9311-HV	OD	Chr1_12855611	1	12742169	14436721	0.0479901	-0.272452	-6.63272	LOC_Os01g25270		pentatricopeptide repeat protein PPR986-12, putative, expressed
CS-KGW-ind-9311-HV	OD	Chr9_10525328	9	10379568	10756944	0.0645995	0.377086	12.5507	LOC_Os09g17590		expressed protein
CS-KGW-ind-9311-HV	OD	Chr7_21709059	7	21674525	21723154	0.0294222	0.521435	35.7494	LOC_Os07g36290		OsFBX242 - F-box domain containing protein, expressed
CS-KGW-ind-9311-HV	OD	Chr11_1159439	11	1151477	1159439	0.260486	0.846953	3.3402	LOC_Os11g03170		retrotransposon protein, putative, unclassified, expressed
CS-KGW-ind-9311-HV	OD	Chr7_21709059	7	21674525	21723154	0.0294222	0.521435	35.7494	LOC_Os07g36280		OsFBX241 - F-box domain containing protein, expressed
CS-KGW-ind-9311-HV	OD	Chr9_10525328	9	10379568	10756944	0.0645995	0.377086	12.5507	LOC_Os09g17190		OsFBX320 - F-box domain containing protein, expressed
CS-KGW-ind-9311-HV	OD	Chr6_25118984	6	25102844	25153208	0.0574621	0.17946	3.32459	LOC_Os06g41910		expressed protein
CS-KGW-ind-9311-HV	OD	Chr3_28670644	3	28546600	28875714	0.0865863	0.397934	6.40633	LOC_Os03g50190		expressed protein
CS-KGW-ind-9311-P	D	Chr7_11787543	7	10753135	13211528	0.337365	0.461831	1.38176	LOC_Os07g18154		aldehyde oxidase 4, putative, expressed
CS-KGW-ind-9311-P	OD	Chr8_23114006	8	22242687	23296915	0.382406	-0.690452	-1.80598	LOC_Os08g36560		emp24/gp25L/p24 family protein, putative, expressed
CS-KGW-ind-9311-P	A	Chr6_11929729	6	11910129	11934136	0.190655	-0.0903388	-0.47304	LOC_Os06g20660		retrotransposon protein, putative, Ty3-gypsy subclass, expressed
CS-KGW-ind-9311-P	A	Chr2_19842372	2	19806555	20364087	0.200397	0.00241044	0.0120895	LOC_Os02g33370		retrotransposon protein, putative, Ty3-gypsy subclass, expressed
CS-KGW-ind-9311-P	OD	Chr8_23114006	8	22242687	23296915	0.382406	-0.690452	-1.80598	LOC_Os08g35500		expressed protein
CS-KGW-ind-9311-P	OD	Chr6_9138436	6	9124960	9287527	0.148456	-0.276648	-1.90269	LOC_Os06g16300		BRASSINOSTEROID INSENSITIVE 1-associated receptor kinase 1 precursor, putative, expressed
CS-KGW-ind-9311-P	A	Chr5_20367537	5	20240566	20661926	0.394782	0.0739111	0.175246	LOC_Os05g34360		retrotransposon protein, putative, unclassified
CS-KGW-ind-9311-P	OD	Chr8_23114006	8	22242687	23296915	0.382406	-0.690452	-1.80598	LOC_Os08g36870		transposon protein, putative, CACTA, En/Spm sub-class, expressed
CS-KGW-ind-9311-P	D	Chr2_33113453	2	32661513	33113453	0.296991	0.200064	0.672384	LOC_Os02g53850		OsSub21 - Putative Subtilisin homologue, expressed
CS-KGW-ind-9311-P	OD	Chr8_23114006	8	22242687	23296915	0.382406	-0.690452	-1.80598	LOC_Os08g35300		expressed protein
CS-KGW-ind-9311-P	D	Chr6_19652909	6	19544240	19673899	0.252481	0.21251	0.860839	LOC_Os06g33730		expressed protein
CS-KGW-ind-9311-P	D	Chr6_9993687	6	9898859	9993687	0.211417	-0.24384	-1.17314	LOC_Os06g17080		retrotransposon protein, putative, unclassified, expressed
CS-KGW-ind-9311-P	D	Chr12_22545007	12	22543493	22595944	0.18655	0.233005	1.25255	LOC_Os12g36800		expressed protein
CS-KGW-ind-9311-P	D	Chr10_5204275	10	5204269	5204277	0.247265	0.323532	1.30851	LOC_Os10g09620		OsWAK108 - OsWAK receptor-like protein kinase, expressed
CS-KGW-ind-9311-P	A	Chr2_19842372	2	19806555	20364087	0.200397	0.00241044	0.0120895	LOC_Os02g33340		retrotransposon protein, putative, Ty1-copia subclass, expressed
CS-KGW-ind-9311-P	OD	Chr7_20965989	7	20961432	21054720	0.530659	0.81142	1.52482	LOC_Os07g35160		expressed protein
CS-KGW-ind-9311-P	D	Chr7_11787543	7	10753135	13211528	0.337365	0.461831	1.38176	LOC_Os07g20110		expressed protein
CS-KGW-ind-9311-P	D	Chr12_6760038	12	6758704	6918240	0.176207	0.225061	1.29045	LOC_Os12g12320		retrotransposon protein, putative, unclassified, expressed
CS-KGW-ind-9311-P	D	Chr11_4913541	11	4889555	5359649	0.453302	0.631636	1.40492	LOC_Os11g09474		OsFBX400 - F-box domain containing protein, expressed
CS-KGW-ind-9311-P	D	Chr2_16838141	2	16555148	17106005	0.22392	0.196037	0.89771	LOC_Os02g28074		XRN 5-3 exonuclease N-terminus family protein, expressed
CS-KGW-ind-9311-P	A	Chr1_25363248	1	25362651	25506943	0.411014	-0.12745	-0.311899	LOC_Os01g44230		transcription factor X1, putative, expressed
CS-KGW-ind-9311-P	D	Chr12_6760038	12	6758704	6918240	0.176207	0.225061	1.29045	LOC_Os12g12330		retrotransposon protein, putative, unclassified
CS-KGW-ind-9311-P	D	Chr4_2062131	4	2057847	2230841	0.221805	0.178333	0.800929	LOC_Os04g04370		retrotransposon protein, putative, unclassified
CS-KGW-ind-9311-P	A	Chr2_10811824	2	10799590	10849266	0.201456	0.0650525	0.306196	LOC_Os02g18560		retrotransposon protein, putative, unclassified, expressed
CS-KGW-ind-9311-P	D	Chr6_19652909	6	19544240	19673899	0.252481	0.21251	0.860839	LOC_Os06g33790		hypothetical protein
CS-KGW-ind-9311-P	D	Chr5_14080405	5	13855531	14180783	0.238024	0.331	1.39818	LOC_Os05g24280		expressed protein
CS-KGW-ind-9311-P	D	Chr6_19652909	6	19544240	19673899	0.252481	0.21251	0.860839	LOC_Os06g33620		expressed protein
CS-KGW-ind-9311-P	D	Chr12_6760038	12	6758704	6918240	0.176207	0.225061	1.29045	LOC_Os12g12470		NADP-dependent oxidoreductase, putative, expressed
CS-KGW-ind-9311-P	OD	Chr6_9138436	6	9124960	9287527	0.148456	-0.276648	-1.90269	LOC_Os06g16190		expressed protein
CS-KGW-ind-9311-P	D	Chr5_14080405	5	13855531	14180783	0.238024	0.331	1.39818	LOC_Os05g24160		double-stranded RNA binding motif containing protein, expressed
CS-KGW-ind-9311-P	OD	Chr8_23114006	8	22242687	23296915	0.382406	-0.690452	-1.80598	LOC_Os08g35310		O-methyltransferase, putative, expressed
CS-KGW-ind-9311-P	A	Chr5_20367537	5	20240566	20661926	0.394782	0.0739111	0.175246	LOC_Os05g34820		expressed protein
CS-KGW-ind-9311-P	A	Chr8_24862551	8	24849995	24880788	0.433494	0.0345752	0.0741902	LOC_Os08g39330		skin secretory protein xP2 precursor, putative, expressed
CS-KGW-ind-9311-P	A	Chr2_16469850	2	16378063	16493186	0.226748	0.0160276	0.0688127	LOC_Os02g27720		retrotransposon protein, putative, unclassified, expressed
CS-KGW-ind-9311-P	D	Chr5_14080405	5	13855531	14180783	0.238024	0.331	1.39818	LOC_Os05g24080		hypothetical protein
CS-KGW-ind-9311-P	OD	Chr8_23114006	8	22242687	23296915	0.382406	-0.690452	-1.80598	LOC_Os08g35440		Ser/Thr protein phosphatase family protein, putative, expressed
CS-KGW-ind-9311-P	OD	Chr1_26338443	1	26127733	26396739	0.318415	0.568155	1.81537	LOC_Os01g46110		transposon protein, putative, CACTA, En/Spm sub-class, expressed
CS-KGW-ind-9311-P	OD	Chr8_23114006	8	22242687	23296915	0.382406	-0.690452	-1.80598	LOC_Os08g35370		transposon protein, putative, CACTA, En/Spm sub-class, expressed
CS-KGW-ind-9311-P	A	Chr1_25363248	1	25362651	25506943	0.411014	-0.12745	-0.311899	LOC_Os01g44350		expressed protein
CS-KGW-ind-9311-P	A	Chr6_11929729	6	11910129	11934136	0.190655	-0.0903388	-0.47304	LOC_Os06g20680		retrotransposon protein, putative, unclassified
CS-KGW-ind-9311-P	A	Chr5_20367537	5	20240566	20661926	0.394782	0.0739111	0.175246	LOC_Os05g34330		retrotransposon protein, putative, unclassified, expressed
CS-KGW-ind-9311-P	OD	Chr12_18206744	12	18020474	18277445	0.270641	-0.687225	-2.66456	LOC_Os12g30290		retrotransposon protein, putative, unclassified, expressed
CS-KGW-ind-9311-P	D	Chr6_9828133	6	9826625	9867673	0.260966	-0.153394	-0.593077	LOC_Os06g16980		DNA topoisomerase I family protein, expressed
CS-KGW-ind-9311-P	D	Chr6_19652909	6	19544240	19673899	0.252481	0.21251	0.860839	LOC_Os06g33810		zinc finger protein, putative, expressed
CS-KGW-ind-9311-P	D	Chr11_4913541	11	4889555	5359649	0.453302	0.631636	1.40492	LOC_Os11g09630		OsFBX407 - F-box domain containing protein, expressed
CS-KGW-ind-9311-P	A	Chr2_22609587	2	22596953	22624221	0.264934	0.0425999	0.159356	LOC_Os02g37420		ras-related protein, putative, expressed
CS-KGW-ind-9311-P	D	Chr11_4913541	11	4889555	5359649	0.453302	0.631636	1.40492	LOC_Os11g09580		OsFBL53 - F-box domain and LRR containing protein, expressed
CS-KGW-ind-9311-P	A	Chr2_25644518	2	25644150	25689854	0.244279	-0.0846683	-0.346685	LOC_Os02g42640		CBS domain-containing protein, putative, expressed
CS-KGW-ind-9311-P	D	Chr12_6760038	12	6758704	6918240	0.176207	0.225061	1.29045	LOC_Os12g12490		transposon protein, putative, CACTA, En/Spm sub-class, expressed
CS-KGW-ind-9311-P	D	Chr12_6760038	12	6758704	6918240	0.176207	0.225061	1.29045	LOC_Os12g12310		retrotransposon protein, putative, unclassified
CS-KGW-ind-9311-P	D	Chr11_4913541	11	4889555	5359649	0.453302	0.631636	1.40492	LOC_Os11g09510		OsFBX403 - F-box domain containing protein, expressed
CS-KGW-ind-9311-P	OD	Chr8_23114006	8	22242687	23296915	0.382406	-0.690452	-1.80598	LOC_Os08g35650		expressed protein
CS-KGW-ind-9311-P	OD	Chr8_23114006	8	22242687	23296915	0.382406	-0.690452	-1.80598	LOC_Os08g36630		bifunctional monodehydroascorbate reductase and carbonic anhydrasenectarin-3 precursor, putative, expressed
CS-KGW-ind-9311-P	OD	Chr6_9138436	6	9124960	9287527	0.148456	-0.276648	-1.90269	LOC_Os06g16280		expressed protein
CS-KGW-ind-9311-P	A	Chr2_10811824	2	10799590	10849266	0.201456	0.0650525	0.306196	LOC_Os02g18600		retrotransposon protein, putative, unclassified, expressed
CS-KGW-ind-9311-P	D	Chr2_26070234	2	26030239	26070234	0.21194	-0.311527	-1.47004	LOC_Os02g43270		retrotransposon protein, putative, unclassified, expressed
CS-KGW-ind-9311-P	D	Chr12_6760038	12	6758704	6918240	0.176207	0.225061	1.29045	LOC_Os12g12500		transposon protein, putative, Pong sub-class
CS-KGW-ind-9311-P	A	Chr3_9578294	3	9541442	9585826	0.320369	-0.136384	-0.422464	LOC_Os03g17164		kinesin-related protein, putative, expressed
CS-KGW-ind-9311-P	D	Chr6_1859353	6	1851319	1933634	0.127437	-0.0790651	-0.61777	LOC_Os06g04370		expressed protein
CS-KGW-ind-9311-P	A	Chr2_22558472	2	22553547	22581426	0.259562	0.0196208	0.0734956	LOC_Os02g37320		heavy metal associated domain containing protein, expressed
CS-KGW-ind-9311-P	D	Chr5_14080405	5	13855531	14180783	0.238024	0.331	1.39818	LOC_Os05g24100		retrotransposon protein, putative, unclassified, expressed
CS-KGW-ind-9311-P	D	Chr7_11787543	7	10753135	13211528	0.337365	0.461831	1.38176	LOC_Os07g22700		tim44-like domain containing protein, expressed
CS-KGW-ind-9311-P	D	Chr5_14080405	5	13855531	14180783	0.238024	0.331	1.39818	LOC_Os05g24320		retrotransposon protein, putative, Ty3-gypsy subclass, expressed
CS-KGW-ind-9311-P	D	Chr12_6760038	12	6758704	6918240	0.176207	0.225061	1.29045	LOC_Os12g12290		exostosin family domain containing protein, expressed
CS-KGW-ind-9311-P	D	Chr11_4913541	11	4889555	5359649	0.453302	0.631636	1.40492	LOC_Os11g09310		zinc finger CCHC domain-containing protein 10, putative, expressed
CS-KGW-ind-9311-P	OD	Chr6_9138436	6	9124960	9287527	0.148456	-0.276648	-1.90269	LOC_Os06g16200		proteins of unknown function domain containing protein, expressed
CS-KGW-ind-9311-P	D	Chr3_29572400	3	28891165	29572400	0.143149	-0.163715	-1.14393	LOC_Os03g50590		expressed protein
CS-KGW-ind-9311-P	D	Chr11_4913541	11	4889555	5359649	0.453302	0.631636	1.40492	LOC_Os11g09970		OsFBX411 - F-box domain containing protein, expressed
CS-KGW-ind-9311-P	OD	Chr1_26338443	1	26127733	26396739	0.318415	0.568155	1.81537	LOC_Os01g45990		potassium channel AKT1, putative, expressed
CS-KGW-ind-9311-P	A	Chr2_16469850	2	16378063	16493186	0.226748	0.0160276	0.0688127	LOC_Os02g27810		MazG nucleotide pyrophosphohydrolase domain containing protein, expressed
CS-KGW-ind-9311-P	A	Chr2_16469850	2	16378063	16493186	0.226748	0.0160276	0.0688127	LOC_Os02g27850		retrotransposon protein, putative, unclassified, expressed
CS-KGW-ind-9311-P	A	Chr1_25363248	1	25362651	25506943	0.411014	-0.12745	-0.311899	LOC_Os01g44360		CBS domain containing membrane protein, putative, expressed
CS-KGW-ind-9311-P	OD	Chr8_23114006	8	22242687	23296915	0.382406	-0.690452	-1.80598	LOC_Os08g35630		MTD1, putative, expressed
CS-KGW-ind-9311-P	OD	Chr1_9391763	1	9385676	9560048	0.259575	-0.409655	-1.58151	LOC_Os01g16560		antifreeze glycoprotein, putative, expressed
CS-KGW-ind-9311-P	OD	Chr6_9138436	6	9124960	9287527	0.148456	-0.276648	-1.90269	LOC_Os06g16170		expressed protein
CS-KGW-ind-9311-P	D	Chr11_4913541	11	4889555	5359649	0.453302	0.631636	1.40492	LOC_Os11g09230		ankyrin repeat family protein, putative, expressed
CS-KGW-ind-9311-P	OD	Chr6_9138436	6	9124960	9287527	0.148456	-0.276648	-1.90269	LOC_Os06g16070		receptor-like protein kinase 2 precursor, putative, expressed
CS-KGW-ind-9311-P	OD	Chr6_9138436	6	9124960	9287527	0.148456	-0.276648	-1.90269	LOC_Os06g16160		expressed protein
CS-KGW-ind-9311-P	OD	Chr1_26338443	1	26127733	26396739	0.318415	0.568155	1.81537	LOC_Os01g46080		GDSL-like lipase/acylhydrolase, putative, expressed
CS-KGW-ind-9311-P	D	Chr6_19652909	6	19544240	19673899	0.252481	0.21251	0.860839	LOC_Os06g33759		retrotransposon protein, putative, unclassified
CS-KGW-ind-9311-P	D	Chr6_10599319	6	10564722	10601021	0.286724	-0.232691	-0.812388	LOC_Os06g18690		expressed protein
CS-KGW-ind-9311-P	D	Chr5_14080405	5	13855531	14180783	0.238024	0.331	1.39818	LOC_Os05g24450		hypothetical protein
CS-KGW-ind-9311-P	D	Chr6_10599319	6	10564722	10601021	0.286724	-0.232691	-0.812388	LOC_Os06g18160		expressed protein
CS-KGW-ind-9311-P	OD	Chr8_23114006	8	22242687	23296915	0.382406	-0.690452	-1.80598	LOC_Os08g35780		transposon protein, putative, CACTA, En/Spm sub-class, expressed
CS-KGW-ind-9311-P	OD	Chr1_26338443	1	26127733	26396739	0.318415	0.568155	1.81537	LOC_Os01g46390		DUF538 domain containing protein, putative, expressed
CS-KGW-ind-9311-P	D	Chr11_4913541	11	4889555	5359649	0.453302	0.631636	1.40492	LOC_Os11g09280		OsPDIL1-1 protein disulfide isomerase PDIL1-1, expressed
CS-KGW-ind-9311-P	OD	Chr6_9138436	6	9124960	9287527	0.148456	-0.276648	-1.90269	LOC_Os06g16270		heat shock factor binding protein 2, putative, expressed
CS-KGW-ind-9311-P	D	Chr6_19652909	6	19544240	19673899	0.252481	0.21251	0.860839	LOC_Os06g33660		hypothetical protein
CS-KGW-ind-9311-P	D	Chr11_4913541	11	4889555	5359649	0.453302	0.631636	1.40492	LOC_Os11g09290		retrotransposon protein, putative, unclassified, expressed
CS-KGW-ind-9311-P	OD	Chr1_9391763	1	9385676	9560048	0.259575	-0.409655	-1.58151	LOC_Os01g16700		retrotransposon protein, putative, LINE subclass, expressed
CS-KGW-ind-9311-P	OD	Chr8_23114006	8	22242687	23296915	0.382406	-0.690452	-1.80598	LOC_Os08g35390		retrotransposon protein, putative, unclassified, expressed
CS-KGW-ind-9311-P	A	Chr2_22558472	2	22553547	22581426	0.259562	0.0196208	0.0734956	LOC_Os02g37309		expressed protein
CS-KGW-ind-9311-P	A	Chr2_16469850	2	16378063	16493186	0.226748	0.0160276	0.0688127	LOC_Os02g27780		expressed protein
CS-KGW-ind-9311-P	D	Chr10_11617194	10	11611035	11625427	0.403544	-0.272077	-0.674209	LOC_Os10g22440		expressed protein
CS-KGW-ind-9311-P	D	Chr11_4913541	11	4889555	5359649	0.453302	0.631636	1.40492	LOC_Os11g09960		expressed protein
CS-KGW-ind-9311-P	A	Chr1_25363248	1	25362651	25506943	0.411014	-0.12745	-0.311899	LOC_Os01g44390		MYB family transcription factor, putative, expressed
CS-KGW-ind-9311-P	OD	Chr1_9391763	1	9385676	9560048	0.259575	-0.409655	-1.58151	LOC_Os01g16550		expressed protein
CS-KGW-ind-9311-P	D	Chr7_11787543	7	10753135	13211528	0.337365	0.461831	1.38176	LOC_Os07g22494		expressed protein
CS-KGW-ind-9311-P	D	Chr11_4913541	11	4889555	5359649	0.453302	0.631636	1.40492	LOC_Os11g09360		OsFBX398 - F-box domain containing protein, expressed
CS-KGW-ind-9311-P	D	Chr6_9363197	6	9363197	9540316	0.631126	-0.479324	-0.77123	LOC_Os06g16510		transposon protein, putative, CACTA, En/Spm sub-class, expressed
CS-KGW-ind-9311-P	D	Chr6_19652909	6	19544240	19673899	0.252481	0.21251	0.860839	LOC_Os06g33700		expressed protein
CS-KGW-ind-9311-P	D	Chr11_4913541	11	4889555	5359649	0.453302	0.631636	1.40492	LOC_Os11g09520		retrotransposon protein, putative, unclassified, expressed
CS-KGW-ind-9311-P	D	Chr12_22545007	12	22543493	22595944	0.18655	0.233005	1.25255	LOC_Os12g36870		uncharacterized glycosyltransferase, putative, expressed
CS-KGW-ind-9311-P	D	Chr5_14080405	5	13855531	14180783	0.238024	0.331	1.39818	LOC_Os05g24050		retrotransposon protein, putative, unclassified, expressed
CS-KGW-ind-9311-P	OD	Chr8_23114006	8	22242687	23296915	0.382406	-0.690452	-1.80598	LOC_Os08g35250		transposon protein, putative, CACTA, En/Spm sub-class
CS-KGW-ind-9311-P	D	Chr5_14080405	5	13855531	14180783	0.238024	0.331	1.39818	LOC_Os05g24360		transposon protein, putative, CACTA, En/Spm sub-class, expressed
CS-KGW-ind-9311-P	A	Chr1_25363248	1	25362651	25506943	0.411014	-0.12745	-0.311899	LOC_Os01g44310		dnaJ domain containing protein, expressed
CS-KGW-ind-9311-P	OD	Chr7_20965989	7	20961432	21054720	0.530659	0.81142	1.52482	LOC_Os07g34980		TKL_IRAK_DUF26-lh.9 - DUF26 kinases have homology to DUF26 containing loci, expressed
CS-KGW-ind-9311-P	D	Chr6_9828133	6	9826625	9867673	0.260966	-0.153394	-0.593077	LOC_Os06g16950		expressed protein
CS-KGW-ind-9311-P	D	Chr7_11787543	7	10753135	13211528	0.337365	0.461831	1.38176	LOC_Os07g18874		white-brown complex homolog protein 11, putative, expressed
CS-KGW-ind-9311-P	D	Chr6_19652909	6	19544240	19673899	0.252481	0.21251	0.860839	LOC_Os06g33600		cyclic nucleotide-gated ion channel 1, putative, expressed
CS-KGW-ind-9311-P	A	Chr2_10811824	2	10799590	10849266	0.201456	0.0650525	0.306196	LOC_Os02g18540		uncharacterized Cys-rich domain containing protein, putative, expressed
CS-KGW-ind-9311-P	D	Chr4_2062131	4	2057847	2230841	0.221805	0.178333	0.800929	LOC_Os04g04640		decarboxylase, putative, expressed
CS-KGW-ind-9311-P	D	Chr11_4913541	11	4889555	5359649	0.453302	0.631636	1.40492	LOC_Os11g09170		hydrolase, acting on carbon-nitrogen, putative, expressed
CS-KGW-ind-9311-P	OD	Chr6_9138436	6	9124960	9287527	0.148456	-0.276648	-1.90269	LOC_Os06g16290		ribosomal protein L7Ae, putative, expressed
CS-KGW-ind-9311-P	D	Chr6_9993687	6	9898859	9993687	0.211417	-0.24384	-1.17314	LOC_Os06g17250		anthocyanidin 3-O-glucosyltransferase, putative, expressed
CS-KGW-ind-9311-P	A	Chr8_24862551	8	24849995	24880788	0.433494	0.0345752	0.0741902	LOC_Os08g39360		expressed protein
CS-KGW-ind-9311-P	OD	Chr8_23114006	8	22242687	23296915	0.382406	-0.690452	-1.80598	LOC_Os08g36610		expressed protein
CS-KGW-ind-9311-P	A	Chr6_11929729	6	11910129	11934136	0.190655	-0.0903388	-0.47304	LOC_Os06g20710		retrotransposon protein, putative, unclassified, expressed
CS-KGW-ind-9311-P	A	Chr2_16469850	2	16378063	16493186	0.226748	0.0160276	0.0688127	LOC_Os02g27790		splicing factor 3B subunit 1, putative, expressed
CS-KGW-ind-9311-P	D	Chr1_2203479	1	2179057	2207113	0.07704	-0.0604302	-0.861288	LOC_Os01g04800		B3 DNA binding domain containing protein, expressed
CS-KGW-ind-9311-P	D	Chr6_19652909	6	19544240	19673899	0.252481	0.21251	0.860839	LOC_Os06g33710		spermidine synthase, putative, expressed
CS-KGW-ind-9311-P	OD	Chr8_23114006	8	22242687	23296915	0.382406	-0.690452	-1.80598	LOC_Os08g35430		expressed protein
CS-KGW-ind-9311-P	D	Chr6_19652909	6	19544240	19673899	0.252481	0.21251	0.860839	LOC_Os06g33640		CAPIP1, putative, expressed
CS-KGW-ind-9311-P	A	Chr2_22609587	2	22596953	22624221	0.264934	0.0425999	0.159356	LOC_Os02g37450		expressed protein
CS-KGW-ind-9311-P	D	Chr5_14080405	5	13855531	14180783	0.238024	0.331	1.39818	LOC_Os05g24230		hypothetical protein
CS-KGW-ind-9311-P	D	Chr12_6760038	12	6758704	6918240	0.176207	0.225061	1.29045	LOC_Os12g12340		retrotransposon protein, putative, unclassified, expressed
CS-KGW-ind-9311-P	D	Chr11_4913541	11	4889555	5359649	0.453302	0.631636	1.40492	LOC_Os11g09300		retrotransposon protein, putative, unclassified, expressed
CS-KGW-ind-9311-P	OD	Chr1_9391763	1	9385676	9560048	0.259575	-0.409655	-1.58151	LOC_Os01g16714		flavin monooxygenase, putative, expressed
CS-KGW-ind-9311-P	A	Chr2_25644518	2	25644150	25689854	0.244279	-0.0846683	-0.346685	LOC_Os02g42720		expressed protein
CS-KGW-ind-9311-P	A	Chr1_25363248	1	25362651	25506943	0.411014	-0.12745	-0.311899	LOC_Os01g44380		hypothetical protein
CS-KGW-ind-9311-P	D	Chr12_6760038	12	6758704	6918240	0.176207	0.225061	1.29045	LOC_Os12g12380		transposon protein, putative, unclassified, expressed
CS-KGW-ind-9311-P	D	Chr12_6760038	12	6758704	6918240	0.176207	0.225061	1.29045	LOC_Os12g12580		NADP-dependent oxidoreductase, putative, expressed
CS-KGW-ind-9311-P	OD	Chr1_9391763	1	9385676	9560048	0.259575	-0.409655	-1.58151	LOC_Os01g16540		NEDD8-activating enzyme E1 catalytic subunit, putative, expressed
CS-KGW-ind-9311-P	D	Chr6_1859353	6	1851319	1933634	0.127437	-0.0790651	-0.61777	LOC_Os06g04510		enolase, putative, expressed
CS-KGW-ind-9311-P	D	Chr12_22545007	12	22543493	22595944	0.18655	0.233005	1.25255	LOC_Os12g36860		pathogenesis-related protein 10, putative, expressed
CS-KGW-ind-9311-P	D	Chr11_4913541	11	4889555	5359649	0.453302	0.631636	1.40492	LOC_Os11g09478		OsFBX402 - F-box domain containing protein, expressed
CS-KGW-ind-9311-P	D	Chr7_11787543	7	10753135	13211528	0.337365	0.461831	1.38176	LOC_Os07g18460		expressed protein
CS-KGW-ind-9311-P	D	Chr7_11787543	7	10753135	13211528	0.337365	0.461831	1.38176	LOC_Os07g22640		lipid binding protein, putative, expressed
CS-KGW-ind-9311-P	D	Chr7_11787543	7	10753135	13211528	0.337365	0.461831	1.38176	LOC_Os07g23380		acyl CoA reductase, putative, expressed
CS-KGW-ind-9311-P	A	Chr2_10811824	2	10799590	10849266	0.201456	0.0650525	0.306196	LOC_Os02g18590		retrotransposon protein, putative, Ty3-gypsy subclass, expressed
CS-KGW-ind-9311-P	OD	Chr6_9138436	6	9124960	9287527	0.148456	-0.276648	-1.90269	LOC_Os06g16060		zinc finger, C3HC4 type domain containing protein, expressed
CS-KGW-ind-9311-P	A	Chr2_22558472	2	22553547	22581426	0.259562	0.0196208	0.0734956	LOC_Os02g37380		expressed protein
CS-KGW-ind-9311-P	D	Chr7_11787543	7	10753135	13211528	0.337365	0.461831	1.38176	LOC_Os07g20170		actin-depolymerizing factor, putative, expressed
CS-KGW-ind-9311-P	D	Chr10_11617194	10	11611035	11625427	0.403544	-0.272077	-0.674209	LOC_Os10g22450		inositol-3-phosphate synthase, putative, expressed
CS-KGW-ind-9311-P	D	Chr2_16838141	2	16555148	17106005	0.22392	0.196037	0.89771	LOC_Os02g28280		expressed protein
CS-KGW-ind-9311-P	OD	Chr1_9391763	1	9385676	9560048	0.259575	-0.409655	-1.58151	LOC_Os01g16730		ulp1 protease family, C-terminal catalytic domain containing protein, expressed
CS-KGW-ind-9311-P	A	Chr8_24862551	8	24849995	24880788	0.433494	0.0345752	0.0741902	LOC_Os08g39350		glycerophosphoryl diester phosphodiesterase family protein, putative, expressed
CS-KGW-ind-9311-P	OD	Chr6_9138436	6	9124960	9287527	0.148456	-0.276648	-1.90269	LOC_Os06g16260		OsSigP5 - Putative Type I Signal Peptidase homologue; employs a putative Ser/His catalytic dyad, expressed
CS-KGW-ind-9311-P	OD	Chr1_9391763	1	9385676	9560048	0.259575	-0.409655	-1.58151	LOC_Os01g16620		expressed protein
CS-KGW-ind-9311-P	D	Chr11_4913541	11	4889555	5359649	0.453302	0.631636	1.40492	LOC_Os11g09200		expressed protein
CS-KGW-ind-9311-P	A	Chr1_25363248	1	25362651	25506943	0.411014	-0.12745	-0.311899	LOC_Os01g44320		expressed protein
CS-KGW-ind-9311-P	D	Chr11_4913541	11	4889555	5359649	0.453302	0.631636	1.40492	LOC_Os11g09160		B3 DNA binding domain containing protein, expressed
CS-KGW-ind-9311-P	D	Chr6_1859353	6	1851319	1933634	0.127437	-0.0790651	-0.61777	LOC_Os06g04360		expressed protein
CS-KGW-ind-9311-P	OD	Chr12_18206744	12	18020474	18277445	0.270641	-0.687225	-2.66456	LOC_Os12g30330		hypothetical protein
CS-KGW-ind-9311-P	D	Chr12_6760038	12	6758704	6918240	0.176207	0.225061	1.29045	LOC_Os12g12440		retrotransposon protein, putative, unclassified, expressed
CS-KGW-ind-9311-P	OD	Chr8_23114006	8	22242687	23296915	0.382406	-0.690452	-1.80598	LOC_Os08g35450		retrotransposon protein, putative, unclassified, expressed
CS-KGW-ind-9311-P	D	Chr6_9993687	6	9898859	9993687	0.211417	-0.24384	-1.17314	LOC_Os06g17230		transposon protein, putative, CACTA, En/Spm sub-class
CS-KGW-ind-9311-P	D	Chr2_35042605	2	35024852	35062852	0.253557	0.171514	0.676488	LOC_Os02g57200		expressed protein
CS-KGW-ind-9311-P	OD	Chr8_23114006	8	22242687	23296915	0.382406	-0.690452	-1.80598	LOC_Os08g35540		retrotransposon protein, putative, unclassified, expressed
CS-KGW-ind-9311-P	A	Chr5_20367537	5	20240566	20661926	0.394782	0.0739111	0.175246	LOC_Os05g34350		retrotransposon protein, putative, unclassified, expressed
CS-KGW-ind-9311-P	D	Chr7_11787543	7	10753135	13211528	0.337365	0.461831	1.38176	LOC_Os07g20270		expressed protein
CS-KGW-ind-9311-P	D	Chr5_14080405	5	13855531	14180783	0.238024	0.331	1.39818	LOC_Os05g24350		transposon protein, putative, CACTA, En/Spm sub-class, expressed
CS-KGW-ind-9311-P	OD	Chr2_798953	2	657795	1115126	0.322302	0.502161	1.59663	LOC_Os02g02890		peptidyl-prolyl cis-trans isomerase, putative, expressed
CS-KGW-ind-9311-P	A	Chr2_22609587	2	22596953	22624221	0.264934	0.0425999	0.159356	LOC_Os02g37480		glycine-rich cell wall structural protein precursor, putative, expressed
CS-KGW-ind-9311-P	OD	Chr8_23114006	8	22242687	23296915	0.382406	-0.690452	-1.80598	LOC_Os08g35400		hypothetical protein
CS-KGW-ind-9311-P	D	Chr6_19652909	6	19544240	19673899	0.252481	0.21251	0.860839	LOC_Os06g33570		cyclic nucleotide-gated ion channel 1, putative, expressed
CS-KGW-ind-9311-P	D	Chr5_14080405	5	13855531	14180783	0.238024	0.331	1.39818	LOC_Os05g24210		expressed protein
CS-KGW-ind-9311-P	D	Chr5_14080405	5	13855531	14180783	0.238024	0.331	1.39818	LOC_Os05g24460		retrotransposon protein, putative, unclassified, expressed
CS-KGW-ind-9311-P	OD	Chr8_23114006	8	22242687	23296915	0.382406	-0.690452	-1.80598	LOC_Os08g35290		retrotransposon protein, putative, unclassified, expressed
CS-KGW-ind-9311-P	A	Chr2_10811824	2	10799590	10849266	0.201456	0.0650525	0.306196	LOC_Os02g18550		40S ribosomal protein S3a, putative, expressed
CS-KGW-ind-9311-P	D	Chr6_19652909	6	19544240	19673899	0.252481	0.21251	0.860839	LOC_Os06g33800		hypothetical protein
CS-KGW-ind-9311-P	OD	Chr8_23114006	8	22242687	23296915	0.382406	-0.690452	-1.80598	LOC_Os08g36550		salt tolerant protein, putative, expressed
CS-KGW-ind-9311-P	A	Chr2_16469850	2	16378063	16493186	0.226748	0.0160276	0.0688127	LOC_Os02g27690		Leucine Rich Repeat family protein, expressed
CS-KGW-ind-9311-P	D	Chr7_11787543	7	10753135	13211528	0.337365	0.461831	1.38176	LOC_Os07g22024		zinc finger family protein, putative, expressed
CS-KGW-ind-9311-P	D	Chr5_14080405	5	13855531	14180783	0.238024	0.331	1.39818	LOC_Os05g24340		transposon protein, putative, CACTA, En/Spm sub-class, expressed
CS-KGW-ind-9311-P	A	Chr2_7414680	2	7381680	7414680	0.482967	0.0733226	0.151898	LOC_Os02g13720		expressed protein
CS-KGW-ind-9311-P	D	Chr2_16838141	2	16555148	17106005	0.22392	0.196037	0.89771	LOC_Os02g28550		retrotransposon protein, putative, Ty3-gypsy subclass, expressed
CS-KGW-ind-9311-P	D	Chr12_6760038	12	6758704	6918240	0.176207	0.225061	1.29045	LOC_Os12g12514		NADP-dependent oxidoreductase, putative, expressed
CS-KGW-ind-9311-P	A	Chr1_25363248	1	25362651	25506943	0.411014	-0.12745	-0.311899	LOC_Os01g44260		dihydroflavonol-4-reductase, putative, expressed
CS-KGW-ind-9311-P	A	Chr2_16469850	2	16378063	16493186	0.226748	0.0160276	0.0688127	LOC_Os02g27830		expressed protein
CS-KGW-ind-9311-P	OD	Chr8_23114006	8	22242687	23296915	0.382406	-0.690452	-1.80598	LOC_Os08g35280		retrotransposon protein, putative, Ty3-gypsy subclass, expressed
CS-KGW-ind-9311-P	A	Chr2_16469850	2	16378063	16493186	0.226748	0.0160276	0.0688127	LOC_Os02g27710		disease resistance protein, putative, expressed
CS-KGW-ind-9311-P	A	Chr5_20367537	5	20240566	20661926	0.394782	0.0739111	0.175246	LOC_Os05g34390		protein kinase domain containing protein, expressed
CS-KGW-ind-9311-P	A	Chr2_16469850	2	16378063	16493186	0.226748	0.0160276	0.0688127	LOC_Os02g27640		retrotransposon protein, putative, Ty3-gypsy subclass
CS-KGW-ind-9311-P	D	Chr3_29572400	3	28891165	29572400	0.143149	-0.163715	-1.14393	LOC_Os03g50600		expressed protein
CS-KGW-ind-9311-P	D	Chr5_14080405	5	13855531	14180783	0.238024	0.331	1.39818	LOC_Os05g24090		retrotransposon protein, putative, unclassified, expressed
CS-KGW-ind-9311-P	OD	Chr7_20965989	7	20961432	21054720	0.530659	0.81142	1.52482	LOC_Os07g34990		retrotransposon protein, putative, unclassified, expressed
CS-KGW-ind-9311-P	D	Chr2_33113453	2	32661513	33113453	0.296991	0.200064	0.672384	LOC_Os02g53990		cyclin-related protein, putative, expressed
CS-KGW-ind-9311-P	A	Chr2_16469850	2	16378063	16493186	0.226748	0.0160276	0.0688127	LOC_Os02g27660		expressed protein
CS-KGW-ind-9311-P	D	Chr11_4913541	11	4889555	5359649	0.453302	0.631636	1.40492	LOC_Os11g09180		expressed protein
CS-KGW-ind-9311-P	D	Chr6_19652909	6	19544240	19673899	0.252481	0.21251	0.860839	LOC_Os06g33650		hypothetical protein
CS-KGW-ind-9311-P	D	Chr6_19652909	6	19544240	19673899	0.252481	0.21251	0.860839	LOC_Os06g33680		expressed protein
CS-KGW-ind-9311-P	A	Chr1_25363248	1	25362651	25506943	0.411014	-0.12745	-0.311899	LOC_Os01g44950		AMP-binding enzyme, putative, expressed
CS-KGW-ind-9311-P	D	Chr7_11787543	7	10753135	13211528	0.337365	0.461831	1.38176	LOC_Os07g20180		hypothetical protein
CS-KGW-ind-9311-P	D	Chr11_4913541	11	4889555	5359649	0.453302	0.631636	1.40492	LOC_Os11g09329		VHS and GAT domain containing protein, expressed
CS-KGW-ind-9311-P	D	Chr6_9363197	6	9363197	9540316	0.631126	-0.479324	-0.77123	LOC_Os06g16400		helix-loop-helix DNA-binding domain containing protein, expressed
CS-KGW-ind-9311-P	D	Chr5_14080405	5	13855531	14180783	0.238024	0.331	1.39818	LOC_Os05g24170		retrotransposon protein, putative, unclassified, expressed
CS-KGW-ind-9311-P	A	Chr2_16469850	2	16378063	16493186	0.226748	0.0160276	0.0688127	LOC_Os02g27820		expressed protein
CS-KGW-ind-9311-P	D	Chr5_14080405	5	13855531	14180783	0.238024	0.331	1.39818	LOC_Os05g24310		retrotransposon protein, putative, Ty3-gypsy subclass, expressed
CS-KGW-ind-9311-P	A	Chr2_22609587	2	22596953	22624221	0.264934	0.0425999	0.159356	LOC_Os02g37460		retrotransposon protein, putative, Ty3-gypsy subclass
CS-KGW-ind-9311-P	D	Chr6_19652909	6	19544240	19673899	0.252481	0.21251	0.860839	LOC_Os06g33630		retrotransposon protein, putative, Ty3-gypsy subclass
CS-KGW-ind-9311-P	D	Chr2_16838141	2	16555148	17106005	0.22392	0.196037	0.89771	LOC_Os02g28350		retrotransposon protein, putative, Ty1-copia subclass, expressed
CS-KGW-ind-9311-P	A	Chr2_19842372	2	19806555	20364087	0.200397	0.00241044	0.0120895	LOC_Os02g33400		OsFBL9 - F-box domain and LRR containing protein, expressed
CS-KGW-ind-9311-P	OD	Chr8_23114006	8	22242687	23296915	0.382406	-0.690452	-1.80598	LOC_Os08g35720		retrotransposon protein, putative, unclassified, expressed
CS-KGW-ind-9311-P	A	Chr3_9578294	3	9541442	9585826	0.320369	-0.136384	-0.422464	LOC_Os03g17180		ABC transporter, ATP-binding protein, putative, expressed
CS-KGW-ind-9311-P	D	Chr6_10599319	6	10564722	10601021	0.286724	-0.232691	-0.812388	LOC_Os06g18150		expressed protein
CS-KGW-ind-9311-P	A	Chr2_19842372	2	19806555	20364087	0.200397	0.00241044	0.0120895	LOC_Os02g33380		pectinesterase inhibitor domain containing protein, putative, expressed
CS-KGW-ind-9311-P	D	Chr6_1859353	6	1851319	1933634	0.127437	-0.0790651	-0.61777	LOC_Os06g04350		expressed protein
CS-KGW-ind-9311-P	D	Chr5_14080405	5	13855531	14180783	0.238024	0.331	1.39818	LOC_Os05g24250		retrotransposon protein, putative, Ty3-gypsy subclass, expressed
CS-KGW-ind-9311-P	D	Chr7_11787543	7	10753135	13211528	0.337365	0.461831	1.38176	LOC_Os07g22534		WD domain, G-beta repeat domain containing protein, expressed
CS-KGW-ind-9311-P	A	Chr2_7414680	2	7381680	7414680	0.482967	0.0733226	0.151898	LOC_Os02g13750		retrotransposon protein, putative, unclassified, expressed
CS-KGW-ind-9311-P	D	Chr7_11787543	7	10753135	13211528	0.337365	0.461831	1.38176	LOC_Os07g20570		hypothetical protein
CS-KGW-ind-9311-P	A	Chr2_16469850	2	16378063	16493186	0.226748	0.0160276	0.0688127	LOC_Os02g27680		NB-ARC domain containing protein
CS-KGW-ind-9311-P	D	Chr11_4913541	11	4889555	5359649	0.453302	0.631636	1.40492	LOC_Os11g09990		mTERF family protein, expressed
CS-KGW-ind-9311-P	D	Chr12_6760038	12	6758704	6918240	0.176207	0.225061	1.29045	LOC_Os12g12390		transposon protein, putative, CACTA, En/Spm sub-class, expressed
CS-KGW-ind-9311-P	D	Chr6_19652909	6	19544240	19673899	0.252481	0.21251	0.860839	LOC_Os06g33770		retrotransposon, putative, centromere-specific
CS-KGW-ind-9311-P	A	Chr5_20367537	5	20240566	20661926	0.394782	0.0739111	0.175246	LOC_Os05g34370		retrotransposon protein, putative, unclassified, expressed
CS-KGW-ind-9311-P	D	Chr6_19652909	6	19544240	19673899	0.252481	0.21251	0.860839	LOC_Os06g33610		cyclic nucleotide-gated ion channel 1, putative, expressed
CS-KGW-ind-9311-P	D	Chr5_14080405	5	13855531	14180783	0.238024	0.331	1.39818	LOC_Os05g24190		retrotransposon protein, putative, Ty1-copia subclass, expressed
CS-KGW-ind-9311-P	D	Chr11_4913541	11	4889555	5359649	0.453302	0.631636	1.40492	LOC_Os11g09370		histone deacetylase 19, putative, expressed
CS-KGW-ind-9311-P	A	Chr2_25644518	2	25644150	25689854	0.244279	-0.0846683	-0.346685	LOC_Os02g42630		expressed protein
CS-KGW-ind-9311-P	D	Chr2_16838141	2	16555148	17106005	0.22392	0.196037	0.89771	LOC_Os02g28410		transferase family protein, putative, expressed
CS-KGW-ind-9311-P	D	Chr3_29572400	3	28891165	29572400	0.143149	-0.163715	-1.14393	LOC_Os03g51600		tubulin/FtsZ domain containing protein, putative, expressed
CS-KGW-ind-9311-P	A	Chr2_19842372	2	19806555	20364087	0.200397	0.00241044	0.0120895	LOC_Os02g33360		retrotransposon protein, putative, Ty3-gypsy subclass, expressed
CS-KGW-ind-9311-P	D	Chr11_4913541	11	4889555	5359649	0.453302	0.631636	1.40492	LOC_Os11g09350		expressed protein
CS-KGW-ind-9311-P	D	Chr2_35042605	2	35024852	35062852	0.253557	0.171514	0.676488	LOC_Os02g57220		WD domain, G-beta repeat domain containing protein, expressed
CS-KGW-ind-9311-P	D	Chr6_19652909	6	19544240	19673899	0.252481	0.21251	0.860839	LOC_Os06g33690		CAPIP1, putative, expressed
CS-KGW-ind-9311-P	A	Chr2_22609587	2	22596953	22624221	0.264934	0.0425999	0.159356	LOC_Os02g37470		tetratricopeptide repeat containing protein, putative, expressed
CS-KGW-ind-9311-P	D	Chr11_4913541	11	4889555	5359649	0.453302	0.631636	1.40492	LOC_Os11g09270		ankyrin repeat family protein, putative, expressed
CS-KGW-ind-9311-P	D	Chr7_11787543	7	10753135	13211528	0.337365	0.461831	1.38176	LOC_Os07g22220		F-box-like/WD repeat-containing protein TBL1XR1-A, putative, expressed
CS-KGW-ind-9311-P	OD	Chr8_23114006	8	22242687	23296915	0.382406	-0.690452	-1.80598	LOC_Os08g35410		hypothetical protein
CS-KGW-ind-9311-P	A	Chr8_24862551	8	24849995	24880788	0.433494	0.0345752	0.0741902	LOC_Os08g39340		expressed protein
CS-KGW-ind-9311-P	A	Chr2_10811824	2	10799590	10849266	0.201456	0.0650525	0.306196	LOC_Os02g18530		expressed protein
CS-KGW-ind-9311-P	D	Chr7_11787543	7	10753135	13211528	0.337365	0.461831	1.38176	LOC_Os07g23110		poly synthetase 1, putative, expressed
CS-KGW-ind-9311-P	OD	Chr1_9391763	1	9385676	9560048	0.259575	-0.409655	-1.58151	LOC_Os01g16660		transposon protein, putative, unclassified, expressed
CS-KGW-ind-9311-P	D	Chr3_29572400	3	28891165	29572400	0.143149	-0.163715	-1.14393	LOC_Os03g51510		ribosomal protein L6, putative, expressed
CS-KGW-ind-9311-P	D	Chr5_14080405	5	13855531	14180783	0.238024	0.331	1.39818	LOC_Os05g24070		retrotransposon protein, putative, unclassified, expressed
CS-KGW-ind-9311-P	OD	Chr1_9391763	1	9385676	9560048	0.259575	-0.409655	-1.58151	LOC_Os01g16670		BSD domain-containing protein, putative, expressed
CS-KGW-ind-9311-P	OD	Chr8_23114006	8	22242687	23296915	0.382406	-0.690452	-1.80598	LOC_Os08g35350		expressed protein
CS-KGW-ind-9311-P	OD	Chr1_26338443	1	26127733	26396739	0.318415	0.568155	1.81537	LOC_Os01g46250		lipase, putative, expressed
CS-KGW-ind-9311-P	A	Chr5_20367537	5	20240566	20661926	0.394782	0.0739111	0.175246	LOC_Os05g34440		transposon protein, putative, CACTA, En/Spm sub-class, expressed
CS-KGW-ind-9311-P	D	Chr11_4913541	11	4889555	5359649	0.453302	0.631636	1.40492	LOC_Os11g09190		expressed protein
CS-KGW-ind-9311-P	D	Chr5_14080405	5	13855531	14180783	0.238024	0.331	1.39818	LOC_Os05g24240		retrotransposon protein, putative, unclassified, expressed
CS-KGW-ind-9311-P	D	Chr2_26070234	2	26030239	26070234	0.21194	-0.311527	-1.47004	LOC_Os02g43194		aldehyde dehydrogenase, putative, expressed
CS-KGW-ind-9311-P	OD	Chr8_23114006	8	22242687	23296915	0.382406	-0.690452	-1.80598	LOC_Os08g35319		expressed protein
CS-KGW-ind-9311-P	D	Chr12_6760038	12	6758704	6918240	0.176207	0.225061	1.29045	LOC_Os12g12450		retrotransposon protein, putative, unclassified, expressed
CS-KGW-ind-9311-P	D	Chr12_6760038	12	6758704	6918240	0.176207	0.225061	1.29045	LOC_Os12g12360		transposon protein, putative, Mutator sub-class, expressed
CS-KGW-ind-9311-P	A	Chr6_11929729	6	11910129	11934136	0.190655	-0.0903388	-0.47304	LOC_Os06g20670		retrotransposon protein, putative, unclassified, expressed
CS-KGW-ind-9311-P	D	Chr7_11787543	7	10753135	13211528	0.337365	0.461831	1.38176	LOC_Os07g22496		NADPH-dependent oxidoreductase, putative
CS-KGW-ind-9311-P	D	Chr5_14080405	5	13855531	14180783	0.238024	0.331	1.39818	LOC_Os05g24440		retrotransposon protein, putative, unclassified
CS-KGW-ind-9311-P	OD	Chr1_9391763	1	9385676	9560048	0.259575	-0.409655	-1.58151	LOC_Os01g16610		plastocyanin-like domain containing protein, putative, expressed
CS-KGW-ind-9311-P	D	Chr10_11617194	10	11611035	11625427	0.403544	-0.272077	-0.674209	LOC_Os10g22430		gibberellin response modulator protein, putative, expressed
CS-KGW-ind-9311-P	D	Chr5_14080405	5	13855531	14180783	0.238024	0.331	1.39818	LOC_Os05g24060		retrotransposon protein, putative, Ty3-gypsy subclass, expressed
CS-KGW-ind-Nip-F1	OD	Chr11_23974933	11	22660398	23981966	0.0304683	0.443976	28.0882	LOC_Os11g39780		expressed protein
CS-KGW-ind-Nip-F1	OD	Chr6_26306993	6	25088750	26615444	0.117285	-0.33541	-2.86312	LOC_Os06g43520		cytochrome P450 71D7, putative, expressed
CS-KGW-ind-Nip-F1	OD	Chr12_3593419	12	3191980	3973292	0.189654	-0.613436	-3.32556	LOC_Os12g06900		citrate-binding protein precursor, putative, expressed
CS-KGW-ind-Nip-F1	OD	Chr12_5454811	12	4505329	6751723	0.0406094	-0.34896	-23.9995	LOC_Os12g09089		protein kinase PKN/PRK1, effector, putative, expressed
CS-KGW-ind-Nip-F1	OD	Chr6_7560812	6	7526350	7638154	0.0993589	-0.232949	-2.42269	LOC_Os06g13760		glycosyl transferase 8 domain containing protein, putative, expressed
CS-KGW-ind-Nip-F1	OD	Chr6_27048017	6	26615732	28810505	0.223945	-0.920587	-4.11099	LOC_Os06g45080		rabGAP/TBC domain-containing protein, putative, expressed
CS-KGW-ind-Nip-F1	D	Chr4_13333667	4	13308861	13814412	0.219013	-0.11589	-0.484831	LOC_Os04g23350		retrotransposon protein, putative, unclassified, expressed
CS-KGW-ind-Nip-F1	OD	Chr12_9485829	12	9478290	9577763	0.066541	-0.407878	-6.40482	LOC_Os12g16710		retrotransposon protein, putative, Ty1-copia subclass, expressed
CS-KGW-ind-Nip-F1	OD	Chr5_26741137	5	26539686	27105822	0.0570358	-0.290425	-5.27215	LOC_Os05g45890		tRNAHis guanylyltransferase family protein, expressed
CS-KGW-ind-Nip-F1	OD	Chr5_24842926	5	24639545	26188778	0.039955	-0.379266	-18.6803	LOC_Os05g42280		expressed protein
CS-KGW-ind-Nip-F1	OD	Chr6_27048017	6	26615732	28810505	0.223945	-0.920587	-4.11099	LOC_Os06g44780		expressed protein
CS-KGW-ind-Nip-F1	OD	Chr5_26741137	5	26539686	27105822	0.0570358	-0.290425	-5.27215	LOC_Os05g45820		heavy metal-associated domain containing protein, expressed
CS-KGW-ind-Nip-F1	OD	Chr1_34189260	1	33273845	35114009	0.100901	0.498414	29.5404	LOC_Os01g57910		KH domain containing protein, putative, expressed
CS-KGW-ind-Nip-F1	OD	Chr12_5454811	12	4505329	6751723	0.0406094	-0.34896	-23.9995	LOC_Os12g08870		hypothetical protein
CS-KGW-ind-Nip-F1	OD	Chr6_862621	6	772145	1150169	0.0462894	-0.248834	-6.85162	LOC_Os06g02520		interacting protein of DMI3, putative, expressed
CS-KGW-ind-Nip-F1	OD	Chr12_7351607	12	6766950	7382079	0.0404815	-0.406203	-11.4234	LOC_Os12g12680		transposon protein, putative, Pong sub-class, expressed
CS-KGW-ind-Nip-F1	OD	Chr3_11990322	3	11907983	12045740	0.096104	0.336847	20.8444	LOC_Os03g21140		RNA-binding zinc finger protein, putative, expressed
CS-KGW-ind-Nip-F1	OD	Chr6_27048017	6	26615732	28810505	0.223945	-0.920587	-4.11099	LOC_Os06g44140		transmembrane 9 superfamily member, putative, expressed
CS-KGW-ind-Nip-F1	OD	Chr1_34189260	1	33273845	35114009	0.100901	0.498414	29.5404	LOC_Os01g58070		polyphenol oxidase, putative, expressed
CS-KGW-ind-Nip-F1	A	Chr1_19024229	1	18657904	19130431	0.219399	-0.0887103	0.283055	LOC_Os01g34500		expressed protein
CS-KGW-ind-Nip-F1	OD	Chr7_1042169	7	941547	1115993	0.0739171	-0.496861	-9.85862	LOC_Os07g02610		expressed protein
CS-KGW-ind-Nip-F1	OD	Chr9_1723021	9	242893	1846966	0.115462	0.381992	3.85552	LOC_Os09g03030		transposon protein, putative, CACTA, En/Spm sub-class
CS-KGW-ind-Nip-F1	OD	Chr6_26306993	6	25088750	26615444	0.117285	-0.33541	-2.86312	LOC_Os06g44100	GW6a; OsglHAT1	HLS, putative, expressed
CS-KGW-ind-Nip-F1	OD	Chr7_1903669	7	1151114	3636304	0.0282891	-0.143014	-28.2043	LOC_Os07g03760		26S proteasome non-ATPase regulatory subunit 14, putative, expressed
CS-KGW-ind-Nip-F1	A	Chr1_19024229	1	18657904	19130431	0.219399	-0.0887103	0.283055	LOC_Os01g34690		expressed protein
CS-KGW-ind-Nip-F1	OD	Chr6_27048017	6	26615732	28810505	0.223945	-0.920587	-4.11099	LOC_Os06g47580		REV1, putative, expressed
CS-KGW-ind-Nip-F1	OD	Chr1_34189260	1	33273845	35114009	0.100901	0.498414	29.5404	LOC_Os01g57900		PPR repeat domain containing protein, putative, expressed
CS-KGW-ind-Nip-F1	OD	Chr12_5454811	12	4505329	6751723	0.0406094	-0.34896	-23.9995	LOC_Os12g10680		retrotransposon protein, putative, unclassified, expressed
CS-KGW-ind-Nip-F1	OD	Chr1_22526716	1	22411877	22884023	0.258656	-0.394802	-1.53407	LOC_Os01g39910		expressed protein
CS-KGW-ind-Nip-F1	OD	Chr1_34189260	1	33273845	35114009	0.100901	0.498414	29.5404	LOC_Os01g58290		OsSub9 - Putative Subtilisin homologue, expressed
CS-KGW-ind-Nip-F1	OD	Chr9_1723021	9	242893	1846966	0.115462	0.381992	3.85552	LOC_Os09g02729		phospholipase C, putative, expressed
CS-KGW-ind-Nip-F1	OD	Chr9_1723021	9	242893	1846966	0.115462	0.381992	3.85552	LOC_Os09g02700		polyadenylate-binding protein, putative, expressed
CS-KGW-ind-Nip-F1	OD	Chr1_34189260	1	33273845	35114009	0.100901	0.498414	29.5404	LOC_Os01g59450		ZOS1-13 - C2H2 zinc finger protein, expressed
CS-KGW-ind-Nip-F1	OD	Chr1_34189260	1	33273845	35114009	0.100901	0.498414	29.5404	LOC_Os01g60430		pentatricopeptide repeat-containing protein, putative, expressed
CS-KGW-ind-Nip-F1	OD	Chr1_21626215	1	21181089	21626226	0.0983217	0.511538	5.31468	LOC_Os01g38160		retrotransposon protein, putative, unclassified, expressed
CS-KGW-ind-Nip-F1	OD	Chr1_34189260	1	33273845	35114009	0.100901	0.498414	29.5404	LOC_Os01g58680		apurinic endonuclease-redox protein, putative, expressed
CS-KGW-ind-Nip-F1	OD	Chr11_18858858	11	18822708	18991120	0.0810101	-0.311568	-4.42967	LOC_Os11g32130		expressed protein
CS-KGW-ind-Nip-F1	OD	Chr9_3482779	9	1887917	4402395	0.136904	0.342731	697.99	LOC_Os09g04030		retrotransposon protein, putative, unclassified
CS-KGW-ind-Nip-F1	OD	Chr1_12381977	1	12319860	12583251	0.123808	0.205263	10.6974	LOC_Os01g22352		peroxidase precursor, putative, expressed
CS-KGW-ind-Nip-F1	OD	Chr6_27048017	6	26615732	28810505	0.223945	-0.920587	-4.11099	LOC_Os06g44200		ZOS6-06 - C2H2 zinc finger protein, expressed
CS-KGW-ind-Nip-F1	OD	Chr7_1903669	7	1151114	3636304	0.0282891	-0.143014	-28.2043	LOC_Os07g04880		retrotransposon protein, putative, unclassified
CS-KGW-ind-Nip-F1	OD	Chr6_27048017	6	26615732	28810505	0.223945	-0.920587	-4.11099	LOC_Os06g44680		expressed protein
CS-KGW-ind-Nip-F1	A	Chr1_2110625	1	2067818	2145597	0.270956	0.0763654	1.28541	LOC_Os01g04610		hypothetical protein
CS-KGW-ind-Nip-F1	OD	Chr8_20047758	8	20021659	20074567	0.104638	0.374142	3.75613	LOC_Os08g32410		expressed protein
CS-KGW-ind-Nip-F1	OD	Chr9_3482779	9	1887917	4402395	0.136904	0.342731	697.99	LOC_Os09g07440		retrotransposon protein, putative, unclassified, expressed
CS-KGW-ind-Nip-F1	OD	Chr1_22526716	1	22411877	22884023	0.258656	-0.394802	-1.53407	LOC_Os01g40200		XIK, putative, expressed
CS-KGW-ind-Nip-F1	OD	Chr1_12381977	1	12319860	12583251	0.123808	0.205263	10.6974	LOC_Os01g22070		transposon protein, putative, Mutator sub-class, expressed
CS-KGW-ind-Nip-F1	OD	Chr6_27048017	6	26615732	28810505	0.223945	-0.920587	-4.11099	LOC_Os06g44760		expressed protein
CS-KGW-ind-Nip-F1	OD	Chr1_34189260	1	33273845	35114009	0.100901	0.498414	29.5404	LOC_Os01g58340		expressed protein
CS-KGW-ind-Nip-F1	OD	Chr1_34189260	1	33273845	35114009	0.100901	0.498414	29.5404	LOC_Os01g59420		expressed protein
CS-KGW-ind-Nip-F1	OD	Chr9_1723021	9	242893	1846966	0.115462	0.381992	3.85552	LOC_Os09g02830		OsMADS78 - MADS-box family gene with M-alpha type-box, expressed
CS-KGW-ind-Nip-F1	OD	Chr7_21367969	7	21108209	21604753	0.417065	0.843367	2.06522	LOC_Os07g35280		TKL_IRAK_DUF26-lc.1 - DUF26 kinases have homology to DUF26 containing loci, expressed
CS-KGW-ind-Nip-F1	OD	Chr12_3593419	12	3191980	3973292	0.189654	-0.613436	-3.32556	LOC_Os12g06910		nucleolar protein family 6, putative, expressed
CS-KGW-ind-Nip-F1	OD	Chr1_34189260	1	33273845	35114009	0.100901	0.498414	29.5404	LOC_Os01g58890		cysteine proteinase inhibitor precursor protein, putative, expressed
CS-KGW-ind-Nip-F1	OD	Chr1_12381977	1	12319860	12583251	0.123808	0.205263	10.6974	LOC_Os01g22120		retrotransposon protein, putative, unclassified, expressed
CS-KGW-ind-Nip-F1	OD	Chr9_1723021	9	242893	1846966	0.115462	0.381992	3.85552	LOC_Os09g03470		retrotransposon protein, putative, unclassified, expressed
CS-KGW-ind-Nip-F1	OD	Chr6_6606495	6	6593476	6624750	0.104344	0.708541	7.75193	LOC_Os06g12280		glycosyl transferase 8 domain containing protein, putative, expressed
CS-KGW-ind-Nip-F1	OD	Chr9_3482779	9	1887917	4402395	0.136904	0.342731	697.99	LOC_Os09g08440		nodulin MtN3 family protein, putative, expressed
CS-KGW-ind-Nip-F1	OD	Chr11_18858858	11	18822708	18991120	0.0810101	-0.311568	-4.42967	LOC_Os11g32080		expressed protein
CS-KGW-ind-Nip-F1	OD	Chr9_3482779	9	1887917	4402395	0.136904	0.342731	697.99	LOC_Os09g07670		white-brown complex homolog protein 11, putative, expressed
CS-KGW-ind-Nip-F1	OD	Chr12_7351607	12	6766950	7382079	0.0404815	-0.406203	-11.4234	LOC_Os12g12720		jasmonate-induced protein, putative, expressed
CS-KGW-ind-Nip-F1	OD	Chr10_14852766	10	13990531	15988580	0.151322	0.347038	2.40609	LOC_Os10g27110		expressed protein
CS-KGW-ind-Nip-F1	OD	Chr3_29832653	3	29832653	29945804	0.0159877	-0.189706	-17.6776	LOC_Os03g52030		expressed protein
CS-KGW-ind-Nip-F1	OD	Chr12_5454811	12	4505329	6751723	0.0406094	-0.34896	-23.9995	LOC_Os12g10190		transposon protein, putative, unclassified, expressed
CS-KGW-ind-Nip-F1	OD	Chr3_11990322	3	11907983	12045740	0.096104	0.336847	20.8444	LOC_Os03g20990		expressed protein
CS-KGW-ind-Nip-F1	D	Chr11_10758969	11	10720011	10758969	0.0766919	-0.092109	-1.39567	LOC_Os11g18919		expressed protein
CS-KGW-ind-Nip-F1	OD	Chr12_15975344	12	15877774	15975344	0.101028	-0.426962	-4.35292	LOC_Os12g27096		retrotransposon protein, putative, Ty1-copia subclass, expressed
CS-KGW-ind-Nip-F1	OD	Chr6_27048017	6	26615732	28810505	0.223945	-0.920587	-4.11099	LOC_Os06g44610		membrane associated DUF588 domain containing protein, putative, expressed
CS-KGW-ind-Nip-F1	OD	Chr7_1042169	7	941547	1115993	0.0739171	-0.496861	-9.85862	LOC_Os07g02770		OsFBL32 - F-box domain and LRR containing protein, expressed
CS-KGW-ind-Nip-F1	OD	Chr1_34189260	1	33273845	35114009	0.100901	0.498414	29.5404	LOC_Os01g58860		auxin efflux carrier component, putative, expressed
CS-KGW-ind-Nip-F1	D	Chr5_18560285	5	18484312	18567325	0.214817	0.136894	0.666909	LOC_Os05g31740		cytochrome P450 86A2, putative, expressed
CS-KGW-ind-Nip-F1	OD	Chr5_24842926	5	24639545	26188778	0.039955	-0.379266	-18.6803	LOC_Os05g42420		expressed protein
CS-KGW-ind-Nip-F1	OD	Chr1_34189260	1	33273845	35114009	0.100901	0.498414	29.5404	LOC_Os01g60560		retrotransposon protein, putative, unclassified, expressed
CS-KGW-ind-Nip-F1	OD	Chr5_24842926	5	24639545	26188778	0.039955	-0.379266	-18.6803	LOC_Os05g42400		hypothetical protein
CS-KGW-ind-Nip-F1	OD	Chr1_34189260	1	33273845	35114009	0.100901	0.498414	29.5404	LOC_Os01g59400		expressed protein
CS-KGW-ind-Nip-F1	OD	Chr12_5454811	12	4505329	6751723	0.0406094	-0.34896	-23.9995	LOC_Os12g09550		expressed protein
CS-KGW-ind-Nip-F1	OD	Chr2_5455099	2	5455099	5608781	0.34843	0.577095	1.65931	LOC_Os02g10650		CRAL/TRIO domain containing protein, expressed
CS-KGW-ind-Nip-F1	D	Chr1_25087921	1	24321434	25180566	0.458608	0.484372	1.05661	LOC_Os01g43895		expressed protein
CS-KGW-ind-Nip-F1	OD	Chr1_34189260	1	33273845	35114009	0.100901	0.498414	29.5404	LOC_Os01g57870		disease resistance protein RPS2, putative, expressed
CS-KGW-ind-Nip-F1	OD	Chr10_2496374	10	2442284	2547542	0.161757	0.438281	3.42669	LOC_Os10g05200		OsFBX367 - F-box domain containing protein, expressed
CS-KGW-ind-Nip-F1	D	Chr9_5092554	9	4600898	5607443	0.271027	0.225734	0.864686	LOC_Os09g09240		retrotransposon protein, putative, Ty3-gypsy subclass, expressed
CS-KGW-ind-Nip-F1	OD	Chr7_1903669	7	1151114	3636304	0.0282891	-0.143014	-28.2043	LOC_Os07g04160		peptidyl-prolyl cis-trans isomerase, FKBP-type, putative, expressed
CS-KGW-ind-Nip-F1	D	Chr1_19168166	1	19149856	19342189	0.199723	0.203229	0.996231	LOC_Os01g34720		retrotransposon protein, putative, unclassified, expressed
CS-KGW-ind-Nip-F1	OD	Chr7_1903669	7	1151114	3636304	0.0282891	-0.143014	-28.2043	LOC_Os07g05120		expressed protein
CS-KGW-ind-Nip-F1	OD	Chr11_18767934	11	18467244	18808992	0.053555	-0.391726	-16.729	LOC_Os11g31970		retrotransposon protein, putative, Ty1-copia subclass, expressed
CS-KGW-ind-Nip-F1	OD	Chr1_34189260	1	33273845	35114009	0.100901	0.498414	29.5404	LOC_Os01g60710		expressed protein
CS-KGW-ind-Nip-F1	D	Chr4_17900276	4	17831108	18035697	0.269329	-0.347947	-1.3101	LOC_Os04g30010		OsWAK45 - OsWAK receptor-like protein kinase, expressed
CS-KGW-ind-Nip-F1	OD	Chr12_3593419	12	3191980	3973292	0.189654	-0.613436	-3.32556	LOC_Os12g06570		cyclic nucleotide-gated ion channel, putative, expressed
CS-KGW-ind-Nip-F1	OD	Chr6_26306993	6	25088750	26615444	0.117285	-0.33541	-2.86312	LOC_Os06g43690		WD repeat-containing protein, putative, expressed
CS-KGW-ind-Nip-F1	OD	Chr7_1903669	7	1151114	3636304	0.0282891	-0.143014	-28.2043	LOC_Os07g03230		eukaryotic translation initiation factor 3 subunit C, putative, expressed
CS-KGW-ind-Nip-F1	OD	Chr9_3482779	9	1887917	4402395	0.136904	0.342731	697.99	LOC_Os09g03780		expressed protein
CS-KGW-ind-Nip-F1	OD	Chr9_3482779	9	1887917	4402395	0.136904	0.342731	697.99	LOC_Os09g06480		retrotransposon, putative, centromere-specific
CS-KGW-ind-Nip-F1	OD	Chr7_1903669	7	1151114	3636304	0.0282891	-0.143014	-28.2043	LOC_Os07g04020		expressed protein
CS-KGW-ind-Nip-F1	OD	Chr11_23974933	11	22660398	23981966	0.0304683	0.443976	28.0882	LOC_Os11g40080		lipin, N-terminal conserved region family protein, expressed
CS-KGW-ind-Nip-F1	OD	Chr7_1903669	7	1151114	3636304	0.0282891	-0.143014	-28.2043	LOC_Os07g04200		bacterial transferase hexapeptide domain containing protein, expressed
CS-KGW-ind-Nip-F1	OD	Chr1_34189260	1	33273845	35114009	0.100901	0.498414	29.5404	LOC_Os01g59350		transcription factor, putative, expressed
CS-KGW-ind-Nip-F1	OD	Chr1_34189260	1	33273845	35114009	0.100901	0.498414	29.5404	LOC_Os01g59220		retrotransposon protein, putative, unclassified, expressed
CS-KGW-ind-Nip-F1	OD	Chr1_34189260	1	33273845	35114009	0.100901	0.498414	29.5404	LOC_Os01g57700		membrane protein, putative, expressed
CS-KGW-ind-Nip-F1	OD	Chr10_14852766	10	13990531	15988580	0.151322	0.347038	2.40609	LOC_Os10g30620		expressed protein
CS-KGW-ind-Nip-F1	OD	Chr12_5454811	12	4505329	6751723	0.0406094	-0.34896	-23.9995	LOC_Os12g10640		uncharacterized protein ycf45, putative, expressed
CS-KGW-ind-Nip-F1	OD	Chr8_19642563	8	19362213	19727027	0.0508333	0.559624	173.699	LOC_Os08g31720		zinc finger, C3HC4 type domain containing protein, expressed
CS-KGW-ind-Nip-F1	OD	Chr1_34189260	1	33273845	35114009	0.100901	0.498414	29.5404	LOC_Os01g57810		retrotransposon protein, putative, Ty3-gypsy subclass, expressed
CS-KGW-ind-Nip-F1	OD	Chr6_26306993	6	25088750	26615444	0.117285	-0.33541	-2.86312	LOC_Os06g43220		AP2 domain containing protein, expressed
CS-KGW-ind-Nip-F1	D	Chr1_25087921	1	24321434	25180566	0.458608	0.484372	1.05661	LOC_Os01g43851		cytochrome P450 72A1, putative, expressed
CS-KGW-ind-Nip-F1	OD	Chr2_5455099	2	5455099	5608781	0.34843	0.577095	1.65931	LOC_Os02g10460		expressed protein
CS-KGW-ind-Nip-F1	OD	Chr8_11711959	8	11522259	11808059	0.048561	-0.563133	-14.9711	LOC_Os08g19260		expressed protein
CS-KGW-ind-Nip-F1	A	Chr1_15549537	1	15436448	16685539	0.214283	0.0828974	0.331972	LOC_Os01g29000		retrotransposon, putative, centromere-specific, expressed
CS-KGW-ind-Nip-F1	OD	Chr9_1723021	9	242893	1846966	0.115462	0.381992	3.85552	LOC_Os09g03670		retrotransposon protein, putative, unclassified, expressed
CS-KGW-ind-Nip-F1	OD	Chr6_27048017	6	26615732	28810505	0.223945	-0.920587	-4.11099	LOC_Os06g44810		expressed protein
CS-KGW-ind-Nip-F1	OD	Chr12_7351607	12	6766950	7382079	0.0404815	-0.406203	-11.4234	LOC_Os12g12740		leucine-rich repeat family protein, putative, expressed
CS-KGW-ind-Nip-F1	OD	Chr7_21694250	7	21694250	21762341	0.101636	0.620744	9.76785	LOC_Os07g36280		OsFBX241 - F-box domain containing protein, expressed
CS-KGW-ind-Nip-F1	OD	Chr6_7560812	6	7526350	7638154	0.0993589	-0.232949	-2.42269	LOC_Os06g13710		glycosyltransferase, putative, expressed
CS-KGW-ind-Nip-F1	OD	Chr9_3482779	9	1887917	4402395	0.136904	0.342731	697.99	LOC_Os09g04520		retrotransposon protein, putative, Ty3-gypsy subclass, expressed
CS-KGW-ind-Nip-F1	D	Chr3_35485290	3	35485290	35508956	0.123124	-0.0753727	-0.613162	LOC_Os03g62720		exosome complex exonuclease, putative, expressed
CS-KGW-ind-Nip-F1	OD	Chr11_18858858	11	18822708	18991120	0.0810101	-0.311568	-4.42967	LOC_Os11g31980		OsSCP63 - Putative Serine Carboxypeptidase homologue, expressed
CS-KGW-ind-Nip-F1	OD	Chr6_27048017	6	26615732	28810505	0.223945	-0.920587	-4.11099	LOC_Os06g44300		WAX2, putative, expressed
CS-KGW-ind-Nip-F1	OD	Chr7_1042169	7	941547	1115993	0.0739171	-0.496861	-9.85862	LOC_Os07g02750		transposon protein, putative, CACTA, En/Spm sub-class
CS-KGW-ind-Nip-F1	OD	Chr6_27048017	6	26615732	28810505	0.223945	-0.920587	-4.11099	LOC_Os06g45160		pollen allergen, putative, expressed
CS-KGW-ind-Nip-F1	OD	Chr1_34189260	1	33273845	35114009	0.100901	0.498414	29.5404	LOC_Os01g58335		expressed protein
CS-KGW-ind-Nip-F1	OD	Chr11_18858858	11	18822708	18991120	0.0810101	-0.311568	-4.42967	LOC_Os11g32170		stripe rust resistance protein Yr10, putative, expressed
CS-KGW-ind-Nip-F1	OD	Chr12_7351607	12	6766950	7382079	0.0404815	-0.406203	-11.4234	LOC_Os12g13190		retrotransposon protein, putative, unclassified, expressed
CS-KGW-ind-Nip-F1	OD	Chr9_1723021	9	242893	1846966	0.115462	0.381992	3.85552	LOC_Os09g01950		expressed protein
CS-KGW-ind-Nip-F1	OD	Chr8_20198995	8	20081023	20204167	0.0228867	0.434722	31.3129	LOC_Os08g32610		armadillo/beta-catenin repeat family protein, putative, expressed
CS-KGW-ind-Nip-F1	OD	Chr1_34189260	1	33273845	35114009	0.100901	0.498414	29.5404	LOC_Os01g57610		OsGH3.1 - Probable indole-3-acetic acid-amido synthetase, expressed
CS-KGW-ind-Nip-F1	OD	Chr12_5454811	12	4505329	6751723	0.0406094	-0.34896	-23.9995	LOC_Os12g12230		DEFL43 - Defensin and Defensin-like DEFL family, expressed
CS-KGW-ind-Nip-F1	OD	Chr12_3593419	12	3191980	3973292	0.189654	-0.613436	-3.32556	LOC_Os12g07150		amidase family protein, putative, expressed
CS-KGW-ind-Nip-F1	OD	Chr12_5454811	12	4505329	6751723	0.0406094	-0.34896	-23.9995	LOC_Os12g08770		photosystem I reaction center subunit N, chloroplast precursor, putative, expressed
CS-KGW-ind-Nip-F1	OD	Chr6_27048017	6	26615732	28810505	0.223945	-0.920587	-4.11099	LOC_Os06g44620		AMP-binding domain containing protein, expressed
CS-KGW-ind-Nip-F1	OD	Chr9_3482779	9	1887917	4402395	0.136904	0.342731	697.99	LOC_Os09g07520		expressed protein
CS-KGW-ind-Nip-F1	OD	Chr12_5454811	12	4505329	6751723	0.0406094	-0.34896	-23.9995	LOC_Os12g08810		VTC2, putative, expressed
CS-KGW-ind-Nip-F1	OD	Chr12_5454811	12	4505329	6751723	0.0406094	-0.34896	-23.9995	LOC_Os12g10180		NBS-LRR type disease resistance protein Rps1-k-2, putative, expressed
CS-KGW-ind-Nip-F1	D	Chr1_11472442	1	11384982	11493122	0.263964	0.139763	0.517519	LOC_Os01g20190		transposon protein, putative, CACTA, En/Spm sub-class, expressed
CS-KGW-ind-Nip-F1	OD	Chr7_1042169	7	941547	1115993	0.0739171	-0.496861	-9.85862	LOC_Os07g02780		STE_MEKK_ste11_MAP3K.20 - STE kinases include homologs to sterile 7, sterile 11 and sterile 20 from yeast, expressed
CS-KGW-ind-Nip-F1	OD	Chr9_1723021	9	242893	1846966	0.115462	0.381992	3.85552	LOC_Os09g02620		hypothetical protein
CS-KGW-ind-Nip-F1	OD	Chr1_21626215	1	21181089	21626226	0.0983217	0.511538	5.31468	LOC_Os01g38170		retrotransposon protein, putative, unclassified, expressed
CS-KGW-ind-Nip-F1	OD	Chr7_21367969	7	21108209	21604753	0.417065	0.843367	2.06522	LOC_Os07g35660		TKL_IRAK_DUF26-lc.21 - DUF26 kinases have homology to DUF26 containing loci, expressed
CS-KGW-ind-Nip-F1	OD	Chr8_19882361	8	19727098	19882361	0.0965047	-0.6987	-8.04612	LOC_Os08g32000		expressed protein
CS-KGW-ind-Nip-F1	D	Chr9_5092554	9	4600898	5607443	0.271027	0.225734	0.864686	LOC_Os09g09390		transposon protein, putative, CACTA, En/Spm sub-class
CS-KGW-ind-Nip-F1	OD	Chr1_34189260	1	33273845	35114009	0.100901	0.498414	29.5404	LOC_Os01g58970		cytochrome P450, putative, expressed
CS-KGW-ind-Nip-F1	OD	Chr9_1723021	9	242893	1846966	0.115462	0.381992	3.85552	LOC_Os09g03570		retrotransposon, putative, centromere-specific, expressed
CS-KGW-ind-Nip-F1	OD	Chr6_27048017	6	26615732	28810505	0.223945	-0.920587	-4.11099	LOC_Os06g47530		TKL_IRAK_DUF26-lh.6 - DUF26 kinases have homology to DUF26 containing loci, expressed
CS-KGW-ind-Nip-F1	OD	Chr6_27048017	6	26615732	28810505	0.223945	-0.920587	-4.11099	LOC_Os06g45090		expressed protein
CS-KGW-ind-Nip-F1	D	Chr11_10758969	11	10720011	10758969	0.0766919	-0.092109	-1.39567	LOC_Os11g18860		expressed protein
CS-KGW-ind-Nip-F1	OD	Chr11_18767934	11	18467244	18808992	0.053555	-0.391726	-16.729	LOC_Os11g31590		armadillo, putative, expressed
CS-KGW-ind-Nip-F1	OD	Chr6_27048017	6	26615732	28810505	0.223945	-0.920587	-4.11099	LOC_Os06g44770		expressed protein
CS-KGW-ind-Nip-F1	OD	Chr11_18858858	11	18822708	18991120	0.0810101	-0.311568	-4.42967	LOC_Os11g32050		expressed protein
CS-KGW-ind-Nip-F1	OD	Chr1_34189260	1	33273845	35114009	0.100901	0.498414	29.5404	LOC_Os01g59490		FAD dependent oxidoreductase domain containing protein, expressed
CS-KGW-ind-Nip-F1	D	Chr9_5092554	9	4600898	5607443	0.271027	0.225734	0.864686	LOC_Os09g09460		harpin-induced protein 1 domain containing protein, expressed
CS-KGW-ind-Nip-F1	OD	Chr7_1903669	7	1151114	3636304	0.0282891	-0.143014	-28.2043	LOC_Os07g03070		tetratricopeptide repeat containing protein, putative, expressed
CS-KGW-ind-Nip-F1	OD	Chr11_18767934	11	18467244	18808992	0.053555	-0.391726	-16.729	LOC_Os11g31820		expressed protein
CS-KGW-ind-Nip-F1	OD	Chr7_1903669	7	1151114	3636304	0.0282891	-0.143014	-28.2043	LOC_Os07g03040		expressed protein
CS-KGW-ind-Nip-F1	OD	Chr6_6606495	6	6593476	6624750	0.104344	0.708541	7.75193	LOC_Os06g12250		sphingolipid C4-hydroxylase SUR2, putative, expressed
CS-KGW-ind-Nip-F1	OD	Chr7_1042169	7	941547	1115993	0.0739171	-0.496861	-9.85862	LOC_Os07g02760		OsFBD13 - F-box and FBD domain containing protein, expressed
CS-KGW-ind-Nip-F1	OD	Chr9_1723021	9	242893	1846966	0.115462	0.381992	3.85552	LOC_Os09g03580		expressed protein
CS-KGW-ind-Nip-F1	OD	Chr8_19882361	8	19727098	19882361	0.0965047	-0.6987	-8.04612	LOC_Os08g31810		RNA recognition motif containing protein, putative, expressed
CS-KGW-ind-Nip-F1	OD	Chr1_34189260	1	33273845	35114009	0.100901	0.498414	29.5404	LOC_Os01g59360		CAMK_CAMK_like.10 - CAMK includes calcium/calmodulin depedent protein kinases, expressed
CS-KGW-ind-Nip-F1	OD	Chr6_7560812	6	7526350	7638154	0.0993589	-0.232949	-2.42269	LOC_Os06g13740		transposon protein, putative, unclassified, expressed
CS-KGW-ind-Nip-F1	OD	Chr9_3482779	9	1887917	4402395	0.136904	0.342731	697.99	LOC_Os09g06310		hypothetical protein
CS-KGW-ind-Nip-F1	OD	Chr9_1723021	9	242893	1846966	0.115462	0.381992	3.85552	LOC_Os09g03180		transposon protein, putative, unclassified, expressed
CS-KGW-ind-Nip-F1	OD	Chr12_3593419	12	3191980	3973292	0.189654	-0.613436	-3.32556	LOC_Os12g07350		tRNA nucleotidyltransferase/polyA polymerase family protein, putative, expressed
CS-KGW-ind-Nip-F1	OD	Chr9_1723021	9	242893	1846966	0.115462	0.381992	3.85552	LOC_Os09g02180		expressed protein
CS-KGW-ind-Nip-F1	OD	Chr1_22526716	1	22411877	22884023	0.258656	-0.394802	-1.53407	LOC_Os01g40070		expressed protein
CS-KGW-ind-Nip-F1	OD	Chr9_1723021	9	242893	1846966	0.115462	0.381992	3.85552	LOC_Os09g03620		wall-associated receptor kinase-like 20 precursor, putative, expressed
CS-KGW-ind-Nip-F1	OD	Chr9_1723021	9	242893	1846966	0.115462	0.381992	3.85552	LOC_Os09g03110		retrotransposon protein, putative, Ty3-gypsy subclass, expressed
CS-KGW-ind-Nip-F1	OD	Chr5_20295845	5	20281127	20313023	0.274794	0.729703	2.80777	LOC_Os05g34260		transposon protein, putative, Ac/Ds sub-class, expressed
CS-KGW-ind-Nip-F1	OD	Chr11_10603699	11	10477513	10604423	0.230599	-0.586382	-2.72044	LOC_Os11g18710		expressed protein
CS-KGW-ind-Nip-F1	OD	Chr9_3482779	9	1887917	4402395	0.136904	0.342731	697.99	LOC_Os09g06240		retrotransposon protein, putative, Ty3-gypsy subclass
CS-KGW-ind-Nip-F1	OD	Chr9_1723021	9	242893	1846966	0.115462	0.381992	3.85552	LOC_Os09g03660		retrotransposon protein, putative, unclassified, expressed
CS-KGW-ind-Nip-F1	OD	Chr1_12381977	1	12319860	12583251	0.123808	0.205263	10.6974	LOC_Os01g22110		retrotransposon protein, putative, unclassified, expressed
CS-KGW-ind-Nip-F1	OD	Chr7_1903669	7	1151114	3636304	0.0282891	-0.143014	-28.2043	LOC_Os07g04060		expressed protein
CS-KGW-ind-Nip-F1	OD	Chr5_24842926	5	24639545	26188778	0.039955	-0.379266	-18.6803	LOC_Os05g42250		cyclic nucleotide-gated ion channel 2, putative, expressed
CS-KGW-ind-Nip-F1	OD	Chr6_26306993	6	25088750	26615444	0.117285	-0.33541	-2.86312	LOC_Os06g43480		cytochrome P450, putative, expressed
CS-KGW-ind-Nip-F1	OD	Chr7_21367969	7	21108209	21604753	0.417065	0.843367	2.06522	LOC_Os07g35670		hypothetical protein
CS-KGW-ind-Nip-F1	OD	Chr10_14852766	10	13990531	15988580	0.151322	0.347038	2.40609	LOC_Os10g30590		pentatricopeptide, putative, expressed
CS-KGW-ind-Nip-F1	OD	Chr1_34189260	1	33273845	35114009	0.100901	0.498414	29.5404	LOC_Os01g58300		expressed protein
CS-KGW-ind-Nip-F1	OD	Chr7_1042169	7	941547	1115993	0.0739171	-0.496861	-9.85862	LOC_Os07g02800		MYB family transcription factor, putative, expressed
CS-KGW-ind-Nip-F1	OD	Chr6_27048017	6	26615732	28810505	0.223945	-0.920587	-4.11099	LOC_Os06g44430		protein kinase, putative, expressed
CS-KGW-ind-Nip-F1	OD	Chr1_12381977	1	12319860	12583251	0.123808	0.205263	10.6974	LOC_Os01g22080		expressed protein
CS-KGW-ind-Nip-F1	OD	Chr10_14852766	10	13990531	15988580	0.151322	0.347038	2.40609	LOC_Os10g29120		speckle-type POZ protein, putative, expressed
CS-KGW-ind-Nip-F1	OD	Chr11_18767934	11	18467244	18808992	0.053555	-0.391726	-16.729	LOC_Os11g31940		GDSL-like lipase/acylhydrolase, putative, expressed
CS-KGW-ind-Nip-F1	OD	Chr8_19642563	8	19362213	19727027	0.0508333	0.559624	173.699	LOC_Os08g31740		carboxyl-terminal proteinase, putative, expressed
CS-KGW-ind-Nip-F1	OD	Chr7_21694250	7	21694250	21762341	0.101636	0.620744	9.76785	LOC_Os07g36400		expressed protein
CS-KGW-ind-Nip-F1	OD	Chr2_5455099	2	5455099	5608781	0.34843	0.577095	1.65931	LOC_Os02g10540		ribosomal protein L7/L12 C-terminal domain containing protein, expressed
CS-KGW-ind-Nip-F1	OD	Chr11_23974933	11	22660398	23981966	0.0304683	0.443976	28.0882	LOC_Os11g40180		dirigent, putative, expressed
CS-KGW-ind-Nip-F1	OD	Chr1_34189260	1	33273845	35114009	0.100901	0.498414	29.5404	LOC_Os01g59320		expressed protein
CS-KGW-ind-Nip-F1	D	Chr9_5092554	9	4600898	5607443	0.271027	0.225734	0.864686	LOC_Os09g09320		nuclear transport factor, putative, expressed
CS-KGW-ind-Nip-F1	OD	Chr11_10603699	11	10477513	10604423	0.230599	-0.586382	-2.72044	LOC_Os11g18570		cytochrome P450, putative, expressed
CS-KGW-ind-Nip-F1	OD	Chr7_21367969	7	21108209	21604753	0.417065	0.843367	2.06522	LOC_Os07g35790		TKL_IRAK_DUF26-ld.5 - DUF26 kinases have homology to DUF26 containing loci, expressed
CS-KGW-ind-Nip-F1	OD	Chr9_1723021	9	242893	1846966	0.115462	0.381992	3.85552	LOC_Os09g02805		expressed protein
CS-KGW-ind-Nip-F1	D	Chr9_5092554	9	4600898	5607443	0.271027	0.225734	0.864686	LOC_Os09g09500		lectin-like receptor kinase, putative, expressed
CS-KGW-ind-Nip-F1	OD	Chr3_29832653	3	29832653	29945804	0.0159877	-0.189706	-17.6776	LOC_Os03g52110		retrotransposon protein, putative, Ty3-gypsy subclass, expressed
CS-KGW-ind-Nip-F1	OD	Chr9_3482779	9	1887917	4402395	0.136904	0.342731	697.99	LOC_Os09g03870		retrotransposon protein, putative, unclassified, expressed
CS-KGW-ind-Nip-F1	OD	Chr6_862621	6	772145	1150169	0.0462894	-0.248834	-6.85162	LOC_Os06g02430		expressed protein
CS-KGW-ind-Nip-F1	OD	Chr7_1903669	7	1151114	3636304	0.0282891	-0.143014	-28.2043	LOC_Os07g04330		expressed protein
CS-KGW-ind-Nip-F1	OD	Chr1_34189260	1	33273845	35114009	0.100901	0.498414	29.5404	LOC_Os01g59530		OsCML1 - Calmodulin-related calcium sensor protein, expressed
CS-KGW-ind-Nip-F1	OD	Chr8_19642563	8	19362213	19727027	0.0508333	0.559624	173.699	LOC_Os08g31730		expressed protein
CS-KGW-ind-Nip-F1	OD	Chr10_14852766	10	13990531	15988580	0.151322	0.347038	2.40609	LOC_Os10g27990		exocyst complex component 6, putative, expressed
CS-KGW-ind-Nip-F1	OD	Chr11_18767934	11	18467244	18808992	0.053555	-0.391726	-16.729	LOC_Os11g31900		acyl carrier protein, putative, expressed
CS-KGW-ind-Nip-F1	OD	Chr6_7560812	6	7526350	7638154	0.0993589	-0.232949	-2.42269	LOC_Os06g13720		dehydrogenase E1 component domain containing protein, expressed
CS-KGW-ind-Nip-F1	OD	Chr1_34189260	1	33273845	35114009	0.100901	0.498414	29.5404	LOC_Os01g59470		expressed protein
CS-KGW-ind-Nip-F1	OD	Chr5_24442056	5	23611606	24630543	0.0539781	-0.312304	-7.01762	LOC_Os05g42010		TraB family protein, putative, expressed
CS-KGW-ind-Nip-F1	OD	Chr7_1903669	7	1151114	3636304	0.0282891	-0.143014	-28.2043	LOC_Os07g04250		hypothetical protein
CS-KGW-ind-Nip-F1	OD	Chr11_18858858	11	18822708	18991120	0.0810101	-0.311568	-4.42967	LOC_Os11g32040		hypothetical protein
CS-KGW-ind-Nip-F1	OD	Chr1_21626215	1	21181089	21626226	0.0983217	0.511538	5.31468	LOC_Os01g38140		retrotransposon protein, putative, unclassified, expressed
CS-KGW-ind-Nip-F1	OD	Chr12_3593419	12	3191980	3973292	0.189654	-0.613436	-3.32556	LOC_Os12g06640		homeodomain, putative, expressed
CS-KGW-ind-Nip-F1	OD	Chr11_18767934	11	18467244	18808992	0.053555	-0.391726	-16.729	LOC_Os11g31690		expressed protein
CS-KGW-ind-Nip-F1	A	Chr1_19024229	1	18657904	19130431	0.219399	-0.0887103	0.283055	LOC_Os01g34590		expressed protein
CS-KGW-ind-Nip-F1	OD	Chr5_24842926	5	24639545	26188778	0.039955	-0.379266	-18.6803	LOC_Os05g42180		ethylene-responsive protein related, putative, expressed
CS-KGW-ind-Nip-F1	OD	Chr1_12381977	1	12319860	12583251	0.123808	0.205263	10.6974	LOC_Os01g22050		retrotransposon protein, putative, unclassified, expressed
CS-KGW-ind-Nip-F1	OD	Chr9_3482779	9	1887917	4402395	0.136904	0.342731	697.99	LOC_Os09g06464	OsCO3	CCT/B-box zinc finger protein, putative, expressed
CS-KGW-ind-Nip-F1	OD	Chr1_34189260	1	33273845	35114009	0.100901	0.498414	29.5404	LOC_Os01g58800		expressed protein
CS-KGW-ind-Nip-F1	OD	Chr11_18767934	11	18467244	18808992	0.053555	-0.391726	-16.729	LOC_Os11g31880		phosphoglycerate mutase, putative, expressed
CS-KGW-ind-Nip-F1	D	Chr9_5092554	9	4600898	5607443	0.271027	0.225734	0.864686	LOC_Os09g09960		retrotransposon protein, putative, Ty3-gypsy subclass, expressed
CS-KGW-ind-Nip-F1	OD	Chr11_18858858	11	18822708	18991120	0.0810101	-0.311568	-4.42967	LOC_Os11g32140		transposon protein, putative, CACTA, En/Spm sub-class, expressed
CS-KGW-ind-Nip-F1	OD	Chr1_34189260	1	33273845	35114009	0.100901	0.498414	29.5404	LOC_Os01g58270		OsSub7 - Putative Subtilisin homologue, expressed
CS-KGW-ind-Nip-F1	OD	Chr6_7560812	6	7526350	7638154	0.0993589	-0.232949	-2.42269	LOC_Os06g13700		hypothetical protein
CS-KGW-ind-Nip-F1	OD	Chr12_5454811	12	4505329	6751723	0.0406094	-0.34896	-23.9995	LOC_Os12g08780		flavin monooxygenase, putative, expressed
CS-KGW-ind-Nip-F1	D	Chr7_4657021	7	4429133	4696757	0.228272	-0.211106	-1.04755	LOC_Os07g08880		ES43 protein, putative, expressed
CS-KGW-ind-Nip-F1	A	Chr1_19024229	1	18657904	19130431	0.219399	-0.0887103	0.283055	LOC_Os01g33930		expressed protein
CS-KGW-ind-Nip-F1	OD	Chr2_799133	2	459859	799133	0.244197	-0.657779	-3.16202	LOC_Os02g02180		retrotransposon protein, putative, unclassified
CS-KGW-ind-Nip-F1	OD	Chr3_29832653	3	29832653	29945804	0.0159877	-0.189706	-17.6776	LOC_Os03g52040		OsSCP19 - Putative Serine Carboxypeptidase homologue, expressed
CS-KGW-ind-Nip-F1	OD	Chr6_27048017	6	26615732	28810505	0.223945	-0.920587	-4.11099	LOC_Os06g44860		OsSPL10 - SBP-box gene family member, expressed
CS-KGW-ind-Nip-F1	OD	Chr11_18858858	11	18822708	18991120	0.0810101	-0.311568	-4.42967	LOC_Os11g32100		inducer of CBF expression 1, putative, expressed
CS-KGW-ind-Nip-F1	OD	Chr6_27048017	6	26615732	28810505	0.223945	-0.920587	-4.11099	LOC_Os06g45030		transposon protein, putative, unclassified, expressed
CS-KGW-ind-Nip-F1	OD	Chr1_34189260	1	33273845	35114009	0.100901	0.498414	29.5404	LOC_Os01g57920		OsFBL3 - F-box domain and LRR containing protein, expressed
CS-KGW-ind-Nip-F1	D	Chr1_31632365	1	31274992	31632365	0.33624	0.330846	1.01233	LOC_Os01g54760		hypothetical protein
CS-KGW-ind-Nip-F1	OD	Chr7_1903669	7	1151114	3636304	0.0282891	-0.143014	-28.2043	LOC_Os07g04270		hypothetical protein
CS-KGW-ind-Nip-F1	OD	Chr12_15975344	12	15877774	15975344	0.101028	-0.426962	-4.35292	LOC_Os12g27110		expressed protein
CS-KGW-ind-Nip-F1	OD	Chr12_7351607	12	6766950	7382079	0.0404815	-0.406203	-11.4234	LOC_Os12g13260		retrotransposon protein, putative, unclassified, expressed
CS-KGW-ind-Nip-F1	OD	Chr6_26306993	6	25088750	26615444	0.117285	-0.33541	-2.86312	LOC_Os06g41900		transposon protein, putative, unclassified, expressed
CS-KGW-ind-Nip-F1	D	Chr1_19168166	1	19149856	19342189	0.199723	0.203229	0.996231	LOC_Os01g34730		retrotransposon protein, putative, Ty3-gypsy subclass, expressed
CS-KGW-ind-Nip-F1	OD	Chr10_14852766	10	13990531	15988580	0.151322	0.347038	2.40609	LOC_Os10g28590		CAF1 family ribonuclease containing protein, expressed
CS-KGW-ind-Nip-F1	OD	Chr11_18767934	11	18467244	18808992	0.053555	-0.391726	-16.729	LOC_Os11g31950		expressed protein
CS-KGW-ind-Nip-F1	OD	Chr1_34189260	1	33273845	35114009	0.100901	0.498414	29.5404	LOC_Os01g57710		membrane protein, putative, expressed
CS-KGW-ind-Nip-F1	OD	Chr7_21367969	7	21108209	21604753	0.417065	0.843367	2.06522	LOC_Os07g35690		TKL_IRAK_DUF26-lc.3 - DUF26 kinases have homology to DUF26 containing loci, expressed
CS-KGW-ind-Nip-F1	OD	Chr1_34189260	1	33273845	35114009	0.100901	0.498414	29.5404	LOC_Os01g58400		zinc finger C3HC4 type family protein, putative, expressed
CS-KGW-ind-Nip-F1	OD	Chr6_27048017	6	26615732	28810505	0.223945	-0.920587	-4.11099	LOC_Os06g44730		retrotransposon protein, putative, unclassified, expressed
CS-KGW-ind-Nip-F1	A	Chr7_20905857	7	20905808	20917094	0.383786	0.0502107	0.125244	LOC_Os07g34890		expressed protein
CS-KGW-ind-Nip-F1	A	Chr1_2110625	1	2067818	2145597	0.270956	0.0763654	1.28541	LOC_Os01g04680		retrotransposon protein, putative, unclassified, expressed
CS-KGW-ind-Nip-F1	OD	Chr5_24842926	5	24639545	26188778	0.039955	-0.379266	-18.6803	LOC_Os05g43060		retrotransposon, putative, centromere-specific, expressed
CS-KGW-ind-Nip-F1	OD	Chr5_26741137	5	26539686	27105822	0.0570358	-0.290425	-5.27215	LOC_Os05g45980		expressed protein
CS-KGW-ind-Nip-F1	OD	Chr8_20047758	8	20021659	20074567	0.104638	0.374142	3.75613	LOC_Os08g32370		mucin-associated surface protein, putative, expressed
CS-KGW-ind-Nip-F1	OD	Chr9_1723021	9	242893	1846966	0.115462	0.381992	3.85552	LOC_Os09g02890		transposon protein, putative, unclassified
CS-KGW-ind-Nip-F1	OD	Chr9_3482779	9	1887917	4402395	0.136904	0.342731	697.99	LOC_Os09g04130		retrotransposon protein, putative, unclassified, expressed
CS-KGW-ind-Nip-F1	D	Chr9_5092554	9	4600898	5607443	0.271027	0.225734	0.864686	LOC_Os09g09780		retrotransposon protein, putative, unclassified, expressed
CS-KGW-ind-Nip-F1	OD	Chr11_10603699	11	10477513	10604423	0.230599	-0.586382	-2.72044	LOC_Os11g18720		retrotransposon protein, putative, unclassified, expressed
CS-KGW-ind-Nip-F1	OD	Chr9_3482779	9	1887917	4402395	0.136904	0.342731	697.99	LOC_Os09g06330		retrotransposon protein, putative, unclassified, expressed
CS-KGW-ind-Nip-F1	OD	Chr11_18767934	11	18467244	18808992	0.053555	-0.391726	-16.729	LOC_Os11g31770		expressed protein
CS-KGW-ind-Nip-F1	OD	Chr1_22526716	1	22411877	22884023	0.258656	-0.394802	-1.53407	LOC_Os01g39860		1-aminocyclopropane-1-carboxylate oxidase protein, putative, expressed
CS-KGW-ind-Nip-F1	OD	Chr10_14852766	10	13990531	15988580	0.151322	0.347038	2.40609	LOC_Os10g29110		MBTB45 - Bric-a-Brac, Tramtrack, Broad Complex BTB domain with Meprin and TRAF Homology MATH domain, expressed
CS-KGW-ind-Nip-F1	OD	Chr9_3482779	9	1887917	4402395	0.136904	0.342731	697.99	LOC_Os09g04420		retrotransposon protein, putative, Ty3-gypsy subclass, expressed
CS-KGW-ind-Nip-F1	OD	Chr1_34189260	1	33273845	35114009	0.100901	0.498414	29.5404	LOC_Os01g58710		retrotransposon protein, putative, Ty3-gypsy subclass, expressed
CS-KGW-ind-Nip-F1	D	Chr4_17900276	4	17831108	18035697	0.269329	-0.347947	-1.3101	LOC_Os04g29920		reticulon domain containing protein, putative, expressed
CS-KGW-ind-Nip-F1	OD	Chr11_18767934	11	18467244	18808992	0.053555	-0.391726	-16.729	LOC_Os11g31850		expressed protein
CS-KGW-ind-Nip-F1	OD	Chr9_1723021	9	242893	1846966	0.115462	0.381992	3.85552	LOC_Os09g03340		retrotransposon protein, putative, Ty3-gypsy subclass
CS-KGW-ind-Nip-F1	OD	Chr6_27048017	6	26615732	28810505	0.223945	-0.920587	-4.11099	LOC_Os06g44970	OsPIN2	auxin efflux carrier component, putative, expressed
CS-KGW-ind-Nip-F1	A	Chr1_15549537	1	15436448	16685539	0.214283	0.0828974	0.331972	LOC_Os01g27670		transposon protein, putative, CACTA, En/Spm sub-class
CS-KGW-ind-Nip-F1	OD	Chr6_27048017	6	26615732	28810505	0.223945	-0.920587	-4.11099	LOC_Os06g44790		expressed protein
CS-KGW-ind-Nip-F1	OD	Chr7_21367969	7	21108209	21604753	0.417065	0.843367	2.06522	LOC_Os07g35680		TKL_IRAK_DUF26-lc22 - DUF26 kinases have homology to DUF26 containing loci, expressed
CS-KGW-ind-Nip-F1	OD	Chr7_1903669	7	1151114	3636304	0.0282891	-0.143014	-28.2043	LOC_Os07g03150		H-BTB5 - Bric-a-Brac, Tramtrack, Broad Complex BTB domain with H family conserved sequence, expressed
CS-KGW-ind-Nip-F1	OD	Chr1_22526716	1	22411877	22884023	0.258656	-0.394802	-1.53407	LOC_Os01g39960		lycopene epsilon cyclase, chloroplast precursor, putative, expressed
CS-KGW-ind-Nip-F1	OD	Chr1_34189260	1	33273845	35114009	0.100901	0.498414	29.5404	LOC_Os01g57854		pectinesterase, putative, expressed
CS-KGW-ind-Nip-F1	OD	Chr12_7351607	12	6766950	7382079	0.0404815	-0.406203	-11.4234	LOC_Os12g12850		ATP-dependent Clp protease ATP-binding subunit clpA homolog,chloroplast precursor, putative, expressed
CS-KGW-ind-Nip-F1	OD	Chr7_9221254	7	9191117	10563636	0.0930023	-0.33458	-7.44622	LOC_Os07g15880		mitochondrial prohibitin complex protein 2, putative, expressed
CS-KGW-ind-Nip-F1	OD	Chr7_1903669	7	1151114	3636304	0.0282891	-0.143014	-28.2043	LOC_Os07g03740		SCP-like extracellular protein, expressed
CS-KGW-ind-Nip-F1	OD	Chr9_3482779	9	1887917	4402395	0.136904	0.342731	697.99	LOC_Os09g07140		retrotransposon protein, putative, Ty3-gypsy subclass, expressed
CS-KGW-ind-Nip-F1	D	Chr1_11016722	1	11016722	11050378	0.163982	0.228974	1.42818	LOC_Os01g19460		retrotransposon protein, putative, unclassified, expressed
CS-KGW-ind-Nip-F1	OD	Chr6_27048017	6	26615732	28810505	0.223945	-0.920587	-4.11099	LOC_Os06g44640		expressed protein
CS-KGW-ind-Nip-F1	D	Chr1_31632365	1	31274992	31632365	0.33624	0.330846	1.01233	LOC_Os01g54750		expressed protein
CS-KGW-ind-Nip-F1	A	Chr1_15549537	1	15436448	16685539	0.214283	0.0828974	0.331972	LOC_Os01g29780		expressed protein
CS-KGW-ind-Nip-F1	OD	Chr11_18858858	11	18822708	18991120	0.0810101	-0.311568	-4.42967	LOC_Os11g32090		geranylgeranyl transferase type-2 subunit beta, putative, expressed
CS-KGW-ind-Nip-F1	OD	Chr7_1903669	7	1151114	3636304	0.0282891	-0.143014	-28.2043	LOC_Os07g04000		lectin-like receptor kinase, putative, expressed
CS-KGW-ind-Nip-F1	OD	Chr9_3482779	9	1887917	4402395	0.136904	0.342731	697.99	LOC_Os09g06220		retrotransposon protein, putative, unclassified, expressed
CS-KGW-ind-Nip-F1	OD	Chr7_1903669	7	1151114	3636304	0.0282891	-0.143014	-28.2043	LOC_Os07g04110		legume lectins beta domain containing protein, expressed
CS-KGW-ind-Nip-F1	OD	Chr9_1723021	9	242893	1846966	0.115462	0.381992	3.85552	LOC_Os09g02710		CBS domain containing membrane protein, putative, expressed
CS-KGW-ind-Nip-F1	OD	Chr7_1903669	7	1151114	3636304	0.0282891	-0.143014	-28.2043	LOC_Os07g03200		phytosulfokines precursor, putative, expressed
CS-KGW-ind-Nip-F1	OD	Chr1_34189260	1	33273845	35114009	0.100901	0.498414	29.5404	LOC_Os01g58430		expressed protein
CS-KGW-ind-Nip-F1	OD	Chr1_34189260	1	33273845	35114009	0.100901	0.498414	29.5404	LOC_Os01g57670		transposon protein, putative, CACTA, En/Spm sub-class, expressed
CS-KGW-ind-Nip-F1	OD	Chr1_34189260	1	33273845	35114009	0.100901	0.498414	29.5404	LOC_Os01g58410		expressed protein
CS-KGW-ind-Nip-F1	OD	Chr2_799133	2	459859	799133	0.244197	-0.657779	-3.16202	LOC_Os02g02170		transporter, major facilitator family, putative, expressed
CS-KGW-ind-Nip-F1	OD	Chr1_22526716	1	22411877	22884023	0.258656	-0.394802	-1.53407	LOC_Os01g39740		retrotransposon protein, putative, unclassified, expressed
CS-KGW-ind-Nip-F1	OD	Chr1_21626215	1	21181089	21626226	0.0983217	0.511538	5.31468	LOC_Os01g38150		retrotransposon protein, putative, unclassified, expressed
CS-KGW-ind-Nip-F1	OD	Chr9_1723021	9	242893	1846966	0.115462	0.381992	3.85552	LOC_Os09g02030		retrotransposon protein, putative, unclassified, expressed
CS-KGW-ind-Nip-F1	OD	Chr1_34189260	1	33273845	35114009	0.100901	0.498414	29.5404	LOC_Os01g58650		LTPL35 - Protease inhibitor/seed storage/LTP family protein precursor, putative
CS-KGW-ind-Nip-F1	OD	Chr12_5454811	12	4505329	6751723	0.0406094	-0.34896	-23.9995	LOC_Os12g08820		growth regulator related protein, putative, expressed
CS-KGW-ind-Nip-F1	OD	Chr6_27048017	6	26615732	28810505	0.223945	-0.920587	-4.11099	LOC_Os06g44650		hypothetical protein
CS-KGW-ind-Nip-F1	OD	Chr11_18767934	11	18467244	18808992	0.053555	-0.391726	-16.729	LOC_Os11g31920		retrotransposon protein, putative, unclassified, expressed
CS-KGW-ind-Nip-F1	OD	Chr7_1903669	7	1151114	3636304	0.0282891	-0.143014	-28.2043	LOC_Os07g06530		expressed protein
CS-KGW-ind-Nip-F1	OD	Chr12_7351607	12	6766950	7382079	0.0404815	-0.406203	-11.4234	LOC_Os12g13200		transposon protein, putative, CACTA, En/Spm sub-class, expressed
CS-KGW-ind-Nip-F1	OD	Chr11_18858858	11	18822708	18991120	0.0810101	-0.311568	-4.42967	LOC_Os11g32070		expressed protein
CS-KGW-ind-Nip-F1	OD	Chr5_20295845	5	20281127	20313023	0.274794	0.729703	2.80777	LOC_Os05g34290		glutathione gamma-glutamylcysteinyltransferase 1, putative, expressed
CS-KGW-ind-Nip-F1	OD	Chr6_27048017	6	26615732	28810505	0.223945	-0.920587	-4.11099	LOC_Os06g44820		PPR repeat domain containing protein, putative, expressed
CS-KGW-ind-Nip-F1	OD	Chr5_24842926	5	24639545	26188778	0.039955	-0.379266	-18.6803	LOC_Os05g42410		transposon protein, putative, CACTA, En/Spm sub-class, expressed
CS-KGW-ind-Nip-F1	D	Chr9_5092554	9	4600898	5607443	0.271027	0.225734	0.864686	LOC_Os09g10290		retrotransposon protein, putative, Ty1-copia subclass, expressed
CS-KGW-ind-Nip-F1	A	Chr1_2110625	1	2067818	2145597	0.270956	0.0763654	1.28541	LOC_Os01g04710		aspartic proteinase, putative, expressed
CS-KGW-ind-Nip-F1	OD	Chr1_34189260	1	33273845	35114009	0.100901	0.498414	29.5404	LOC_Os01g59180		OsFBX27 - F-box domain containing protein, expressed
CS-KGW-ind-Nip-F1	OD	Chr1_34189260	1	33273845	35114009	0.100901	0.498414	29.5404	LOC_Os01g59570		senescence-induced receptor-like serine/threonine-protein kinase precursor, putative, expressed
CS-KGW-ind-Nip-F1	OD	Chr6_27048017	6	26615732	28810505	0.223945	-0.920587	-4.11099	LOC_Os06g44800		transposon protein, putative, Ac/Ds sub-class, expressed
CS-KGW-ind-Nip-F1	OD	Chr8_19642563	8	19362213	19727027	0.0508333	0.559624	173.699	LOC_Os08g31690		OsFBX291 - F-box domain containing protein, expressed
CS-KGW-ind-Nip-F1	OD	Chr8_19882361	8	19727098	19882361	0.0965047	-0.6987	-8.04612	LOC_Os08g32070		amino acid transporter, putative, expressed
CS-KGW-ind-Nip-F1	OD	Chr1_34189260	1	33273845	35114009	0.100901	0.498414	29.5404	LOC_Os01g57735		expressed protein
CS-KGW-ind-Nip-F1	OD	Chr8_20198995	8	20081023	20204167	0.0228867	0.434722	31.3129	LOC_Os08g32600		STE_MEKK_ste11_MAP3K.21 - STE kinases include homologs to sterile 7, sterile 11 and sterile 20 from yeast, expressed
CS-KGW-ind-Nip-F1	OD	Chr12_7351607	12	6766950	7382079	0.0404815	-0.406203	-11.4234	LOC_Os12g13270		expressed protein
CS-KGW-ind-Nip-F1	OD	Chr7_1042169	7	941547	1115993	0.0739171	-0.496861	-9.85862	LOC_Os07g02710		expressed protein
CS-KGW-ind-Nip-F1	OD	Chr1_12381977	1	12319860	12583251	0.123808	0.205263	10.6974	LOC_Os01g22140		transposon protein, putative, CACTA, En/Spm sub-class, expressed
CS-KGW-ind-Nip-F1	OD	Chr1_34189260	1	33273845	35114009	0.100901	0.498414	29.5404	LOC_Os01g58610		phosphoglycerate kinase protein, putative, expressed
CS-KGW-ind-Nip-F1	D	Chr1_25087921	1	24321434	25180566	0.458608	0.484372	1.05661	LOC_Os01g42909		hypothetical protein
CS-KGW-ind-Nip-F1	OD	Chr12_5454811	12	4505329	6751723	0.0406094	-0.34896	-23.9995	LOC_Os12g09350		transposon protein, putative, Mariner sub-class, expressed
CS-KGW-ind-Nip-F1	OD	Chr1_22526716	1	22411877	22884023	0.258656	-0.394802	-1.53407	LOC_Os01g39750		hypothetical protein
CS-KGW-ind-Nip-F1	OD	Chr7_1903669	7	1151114	3636304	0.0282891	-0.143014	-28.2043	LOC_Os07g03920		lectin-like receptor kinase 7, putative, expressed
CS-KGW-ind-Nip-F1	OD	Chr5_24842926	5	24639545	26188778	0.039955	-0.379266	-18.6803	LOC_Os05g43900		expressed protein
CS-KGW-ind-Nip-F1	OD	Chr12_3593419	12	3191980	3973292	0.189654	-0.613436	-3.32556	LOC_Os12g06680		retrotransposon protein, putative, Ty3-gypsy subclass, expressed
CS-KGW-ind-Nip-F1	OD	Chr12_3593419	12	3191980	3973292	0.189654	-0.613436	-3.32556	LOC_Os12g07080		transposon protein, putative, Mutator sub-class, expressed
CS-KGW-ind-Nip-F1	OD	Chr11_18767934	11	18467244	18808992	0.053555	-0.391726	-16.729	LOC_Os11g31640		serine palmitoyltransferase 2, putative, expressed
CS-KGW-ind-Nip-F1	OD	Chr7_1903669	7	1151114	3636304	0.0282891	-0.143014	-28.2043	LOC_Os07g03140		ternary complex factor MIP1, putative, expressed
CS-KGW-ind-Nip-F1	OD	Chr7_1903669	7	1151114	3636304	0.0282891	-0.143014	-28.2043	LOC_Os07g04180		amino acid transporter, putative, expressed
CS-KGW-ind-Nip-F1	OD	Chr7_21367969	7	21108209	21604753	0.417065	0.843367	2.06522	LOC_Os07g35650		TKL_IRAK_DUF26-lc.2 - DUF26 kinases have homology to DUF26 containing loci, expressed
CS-KGW-ind-Nip-F1	OD	Chr3_11990322	3	11907983	12045740	0.096104	0.336847	20.8444	LOC_Os03g21080		guanine nucleotide exchange factor, putative, expressed
CS-KGW-ind-Nip-F1	OD	Chr11_23974933	11	22660398	23981966	0.0304683	0.443976	28.0882	LOC_Os11g40150		DNA repair protein Rad51, putative, expressed
CS-KGW-ind-Nip-F1	OD	Chr9_1723021	9	242893	1846966	0.115462	0.381992	3.85552	LOC_Os09g03590		retrotransposon protein, putative, unclassified, expressed
CS-KGW-ind-Nip-F1	OD	Chr8_19642563	8	19362213	19727027	0.0508333	0.559624	173.699	LOC_Os08g31670		transporter, putative, expressed
CS-KGW-ind-Nip-F1	OD	Chr9_1723021	9	242893	1846966	0.115462	0.381992	3.85552	LOC_Os09g02840		transposon protein, putative, CACTA, En/Spm sub-class, expressed
CS-KGW-ind-Nip-F1	OD	Chr5_24842926	5	24639545	26188778	0.039955	-0.379266	-18.6803	LOC_Os05g42240		expressed protein
CS-KGW-ind-Nip-F1	D	Chr3_35485290	3	35485290	35508956	0.123124	-0.0753727	-0.613162	LOC_Os03g62710		transposon protein, putative, unclassified, expressed
CS-KGW-ind-Nip-F1	OD	Chr1_22526716	1	22411877	22884023	0.258656	-0.394802	-1.53407	LOC_Os01g40250		down-regulated in metastasis family protein, expressed
CS-KGW-ind-Nip-F1	OD	Chr1_34189260	1	33273845	35114009	0.100901	0.498414	29.5404	LOC_Os01g58470		expressed protein
CS-KGW-ind-Nip-F1	OD	Chr7_1903669	7	1151114	3636304	0.0282891	-0.143014	-28.2043	LOC_Os07g04800		hypothetical protein
CS-KGW-ind-Nip-F1	OD	Chr6_27048017	6	26615732	28810505	0.223945	-0.920587	-4.11099	LOC_Os06g47000		external NADH-ubiquinone oxidoreductase 1, mitochondrial precursor, putative, expressed
CS-KGW-ind-Nip-F1	OD	Chr7_1903669	7	1151114	3636304	0.0282891	-0.143014	-28.2043	LOC_Os07g04320		expressed protein
CS-KGW-ind-Nip-F1	OD	Chr9_3482779	9	1887917	4402395	0.136904	0.342731	697.99	LOC_Os09g03960		expressed protein
CS-KGW-ind-Nip-F1	OD	Chr3_29832653	3	29832653	29945804	0.0159877	-0.189706	-17.6776	LOC_Os03g52150		metalloendopeptidase/ metallopeptidase/ zinc ion binding protein, putative, expressed
CS-KGW-ind-Nip-F1	OD	Chr6_27048017	6	26615732	28810505	0.223945	-0.920587	-4.11099	LOC_Os06g44170		NAD dependent epimerase/dehydratase family protein, putative, expressed
CS-KGW-ind-Nip-F1	OD	Chr1_34189260	1	33273845	35114009	0.100901	0.498414	29.5404	LOC_Os01g58490		expressed protein
CS-KGW-ind-Nip-F1	OD	Chr11_18767934	11	18467244	18808992	0.053555	-0.391726	-16.729	LOC_Os11g31700		expressed protein
CS-KGW-ind-Nip-F1	OD	Chr9_1723021	9	242893	1846966	0.115462	0.381992	3.85552	LOC_Os09g03100		retrotransposon protein, putative, Ty3-gypsy subclass, expressed
CS-KGW-ind-Nip-F1	OD	Chr7_9221254	7	9191117	10563636	0.0930023	-0.33458	-7.44622	LOC_Os07g17480		retrotransposon protein, putative, unclassified
CS-KGW-ind-Nip-F1	OD	Chr6_862621	6	772145	1150169	0.0462894	-0.248834	-6.85162	LOC_Os06g02420		ATOZI1, putative, expressed
CS-KGW-ind-Nip-F1	OD	Chr9_1723021	9	242893	1846966	0.115462	0.381992	3.85552	LOC_Os09g02650		kinesin motor domain containing protein, putative, expressed
CS-KGW-ind-Nip-F1	OD	Chr7_1903669	7	1151114	3636304	0.0282891	-0.143014	-28.2043	LOC_Os07g03210		expressed protein
CS-KGW-ind-Nip-F1	OD	Chr12_5454811	12	4505329	6751723	0.0406094	-0.34896	-23.9995	LOC_Os12g09220		expressed protein
CS-KGW-ind-Nip-F1	OD	Chr11_23974933	11	22660398	23981966	0.0304683	0.443976	28.0882	LOC_Os11g40140		peptidase, T1 family, putative, expressed
CS-KGW-ind-Nip-F1	OD	Chr9_3482779	9	1887917	4402395	0.136904	0.342731	697.99	LOC_Os09g04100		expressed protein
CS-KGW-ind-Nip-F1	OD	Chr1_34189260	1	33273845	35114009	0.100901	0.498414	29.5404	LOC_Os01g60420		expressed protein
CS-KGW-ind-Nip-F1	OD	Chr7_21694250	7	21694250	21762341	0.101636	0.620744	9.76785	LOC_Os07g36340		OsFBX246 - F-box domain containing protein, expressed
CS-KGW-ind-Nip-F1	OD	Chr1_34189260	1	33273845	35114009	0.100901	0.498414	29.5404	LOC_Os01g57890		Homeobox domain containing protein, expressed
CS-KGW-ind-Nip-F1	OD	Chr6_27048017	6	26615732	28810505	0.223945	-0.920587	-4.11099	LOC_Os06g44900		leaf senescence related protein, putative, expressed
CS-KGW-ind-Nip-F1	OD	Chr11_18767934	11	18467244	18808992	0.053555	-0.391726	-16.729	LOC_Os11g31630		expressed protein
CS-KGW-ind-Nip-F1	OD	Chr9_3482779	9	1887917	4402395	0.136904	0.342731	697.99	LOC_Os09g07340		transposon protein, putative, CACTA, En/Spm sub-class, expressed
CS-KGW-ind-Nip-F1	OD	Chr11_18858858	11	18822708	18991120	0.0810101	-0.311568	-4.42967	LOC_Os11g32110		auxin response factor, putative, expressed
CS-KGW-ind-Nip-F1	OD	Chr6_27048017	6	26615732	28810505	0.223945	-0.920587	-4.11099	LOC_Os06g44890		villin protein, putative, expressed
CS-KGW-ind-Nip-F1	OD	Chr11_18858858	11	18822708	18991120	0.0810101	-0.311568	-4.42967	LOC_Os11g31990		retrotransposon protein, putative, unclassified, expressed
CS-KGW-ind-Nip-F1	OD	Chr1_34189260	1	33273845	35114009	0.100901	0.498414	29.5404	LOC_Os01g57740		expressed protein
CS-KGW-ind-Nip-F1	OD	Chr7_1903669	7	1151114	3636304	0.0282891	-0.143014	-28.2043	LOC_Os07g04190		receptor protein kinase CLAVATA1 precursor, putative, expressed
CS-KGW-ind-Nip-F1	OD	Chr7_1903669	7	1151114	3636304	0.0282891	-0.143014	-28.2043	LOC_Os07g04900		NBS-LRR disease resistance protein, putative, expressed
CS-KGW-ind-Nip-F1	OD	Chr1_22526716	1	22411877	22884023	0.258656	-0.394802	-1.53407	LOC_Os01g40210		hypothetical protein
CS-KGW-ind-Nip-F1	D	Chr9_5092554	9	4600898	5607443	0.271027	0.225734	0.864686	LOC_Os09g09590		retrotransposon protein, putative, unclassified, expressed
CS-KGW-ind-Nip-F1	OD	Chr9_3482779	9	1887917	4402395	0.136904	0.342731	697.99	LOC_Os09g07050		retrotransposon, putative, centromere-specific, expressed
CS-KGW-ind-Nip-F1	OD	Chr1_22526716	1	22411877	22884023	0.258656	-0.394802	-1.53407	LOC_Os01g39950		expressed protein
CS-KGW-ind-Nip-F1	OD	Chr7_1903669	7	1151114	3636304	0.0282891	-0.143014	-28.2043	LOC_Os07g03770	d6; OSH15;Oskn3	Homeobox domain containing protein, expressed
CS-KGW-ind-Nip-F1	OD	Chr1_34189260	1	33273845	35114009	0.100901	0.498414	29.5404	LOC_Os01g59190		expressed protein
CS-KGW-ind-Nip-F1	OD	Chr7_21367969	7	21108209	21604753	0.417065	0.843367	2.06522	LOC_Os07g36010		transposon protein, putative, unclassified, expressed
CS-KGW-ind-Nip-F1	OD	Chr7_1903669	7	1151114	3636304	0.0282891	-0.143014	-28.2043	LOC_Os07g03700		expressed protein
CS-KGW-ind-Nip-F1	OD	Chr5_24442056	5	23611606	24630543	0.0539781	-0.312304	-7.01762	LOC_Os05g42130		MONOCULM 1, putative, expressed
CS-KGW-ind-Nip-F1	OD	Chr10_14852766	10	13990531	15988580	0.151322	0.347038	2.40609	LOC_Os10g28790		MBTB36 - Bric-a-Brac, Tramtrack, Broad Complex BTB domain with Meprin and TRAF Homology MATH domain, expressed
CS-KGW-ind-Nip-F1	OD	Chr7_1903669	7	1151114	3636304	0.0282891	-0.143014	-28.2043	LOC_Os07g04010		lectin-like receptor kinase, putative, expressed
CS-KGW-ind-Nip-F1	OD	Chr9_1723021	9	242893	1846966	0.115462	0.381992	3.85552	LOC_Os09g03560		retrotransposon protein, putative, unclassified, expressed
CS-KGW-ind-Nip-F1	OD	Chr1_34189260	1	33273845	35114009	0.100901	0.498414	29.5404	LOC_Os01g57800		retrotransposon protein, putative, Ty3-gypsy subclass, expressed
CS-KGW-ind-Nip-F1	OD	Chr8_19882361	8	19727098	19882361	0.0965047	-0.6987	-8.04612	LOC_Os08g32020		retrotransposon protein, putative, unclassified, expressed
CS-KGW-ind-Nip-F1	OD	Chr1_34189260	1	33273845	35114009	0.100901	0.498414	29.5404	LOC_Os01g58080		membrane-associated salt-inducible protein, putative, expressed
CS-KGW-ind-Nip-F1	D	Chr9_5092554	9	4600898	5607443	0.271027	0.225734	0.864686	LOC_Os09g09470		WD domain, G-beta repeat domain containing protein, expressed
CS-KGW-ind-Nip-F1	OD	Chr7_1903669	7	1151114	3636304	0.0282891	-0.143014	-28.2043	LOC_Os07g03730		SCP-like extracellular protein, expressed
CS-KGW-ind-Nip-F1	OD	Chr7_1042169	7	941547	1115993	0.0739171	-0.496861	-9.85862	LOC_Os07g02620		NB-ARC domain containing protein, expressed
CS-KGW-ind-Nip-F1	OD	Chr6_27048017	6	26615732	28810505	0.223945	-0.920587	-4.11099	LOC_Os06g44630		expressed protein
CS-KGW-ind-Nip-F1	OD	Chr7_1903669	7	1151114	3636304	0.0282891	-0.143014	-28.2043	LOC_Os07g03810		lectin-like receptor kinase 7, putative, expressed
CS-KGW-ind-Nip-F1	OD	Chr1_21626215	1	21181089	21626226	0.0983217	0.511538	5.31468	LOC_Os01g37860		retrotransposon protein, putative, unclassified, expressed
CS-KGW-ind-Nip-F1	OD	Chr1_34189260	1	33273845	35114009	0.100901	0.498414	29.5404	LOC_Os01g59130		proline-rich family protein, putative, expressed
CS-KGW-ind-Nip-F1	OD	Chr9_3482779	9	1887917	4402395	0.136904	0.342731	697.99	LOC_Os09g07410		retrotransposon protein, putative, unclassified, expressed
CS-KGW-ind-Nip-F1	OD	Chr12_15975344	12	15877774	15975344	0.101028	-0.426962	-4.35292	LOC_Os12g27220		transferase family protein, putative, expressed
CS-KGW-ind-Nip-F1	OD	Chr2_5455099	2	5455099	5608781	0.34843	0.577095	1.65931	LOC_Os02g10370		hrpN-interacting protein from Malus, putative, expressed
CS-KGW-ind-Nip-F1	OD	Chr1_34189260	1	33273845	35114009	0.100901	0.498414	29.5404	LOC_Os01g57660		expressed protein
CS-KGW-ind-Nip-F1	OD	Chr9_3482779	9	1887917	4402395	0.136904	0.342731	697.99	LOC_Os09g06350		retrotransposon protein, putative, unclassified, expressed
CS-KGW-ind-Nip-F1	OD	Chr7_21694250	7	21694250	21762341	0.101636	0.620744	9.76785	LOC_Os07g36370		OsFBX247 - F-box domain containing protein, expressed
CS-KGW-ind-Nip-F1	OD	Chr1_22393314	1	22391606	22411727	0.162709	-0.325087	-2.01994	LOC_Os01g39710		expressed protein
CS-KGW-ind-Nip-F1	OD	Chr6_27048017	6	26615732	28810505	0.223945	-0.920587	-4.11099	LOC_Os06g44240		gp176, putative, expressed
CS-KGW-ind-Nip-F1	D	Chr7_4657021	7	4429133	4696757	0.228272	-0.211106	-1.04755	LOC_Os07g08870		expressed protein
CS-KGW-ind-Nip-F1	OD	Chr6_26306993	6	25088750	26615444	0.117285	-0.33541	-2.86312	LOC_Os06g43680		palmitoyltransferase TIP1, putative, expressed
CS-KGW-ind-Nip-F1	OD	Chr9_1723021	9	242893	1846966	0.115462	0.381992	3.85552	LOC_Os09g02170		unc-50, putative, expressed
CS-KGW-ind-Nip-F1	OD	Chr1_34189260	1	33273845	35114009	0.100901	0.498414	29.5404	LOC_Os01g58150		expressed protein
CS-KGW-ind-Nip-F1	OD	Chr7_1903669	7	1151114	3636304	0.0282891	-0.143014	-28.2043	LOC_Os07g03610		SCP-like extracellular protein, expressed
CS-KGW-ind-Nip-F1	OD	Chr12_3593419	12	3191980	3973292	0.189654	-0.613436	-3.32556	LOC_Os12g06620		deoxyhypusine hydroxylase, putative, expressed
CS-KGW-ind-Nip-F1	OD	Chr11_18767934	11	18467244	18808992	0.053555	-0.391726	-16.729	LOC_Os11g31705		expressed protein
CS-KGW-ind-Nip-F1	OD	Chr10_14852766	10	13990531	15988580	0.151322	0.347038	2.40609	LOC_Os10g30210		expressed protein
CS-KGW-ind-Nip-F1	OD	Chr12_5454811	12	4505329	6751723	0.0406094	-0.34896	-23.9995	LOC_Os12g09120		mRNA-capping enzyme, putative, expressed
CS-KGW-ind-Nip-F1	OD	Chr11_18767934	11	18467244	18808992	0.053555	-0.391726	-16.729	LOC_Os11g31750		retrotransposon protein, putative, Ty3-gypsy subclass
CS-KGW-ind-Nip-F1	OD	Chr7_1903669	7	1151114	3636304	0.0282891	-0.143014	-28.2043	LOC_Os07g03060		expressed protein
CS-KGW-ind-Nip-F1	OD	Chr7_21367969	7	21108209	21604753	0.417065	0.843367	2.06522	LOC_Os07g35290		TKL_IRAK_DUF26-lc.10 - DUF26 kinases have homology to DUF26 containing loci, expressed
CS-KGW-ind-Nip-F1	OD	Chr1_22526716	1	22411877	22884023	0.258656	-0.394802	-1.53407	LOC_Os01g39790		esterase/lipase/thioesterase, putative, expressed
CS-KGW-ind-Nip-F1	OD	Chr10_14852766	10	13990531	15988580	0.151322	0.347038	2.40609	LOC_Os10g30550		tRNA methyltransferase, putative, expressed
CS-KGW-ind-Nip-F1	OD	Chr11_23974933	11	22660398	23981966	0.0304683	0.443976	28.0882	LOC_Os11g38260		PAP fibrillin family domain containing protein, expressed
CS-KGW-ind-Nip-F1	OD	Chr9_3482779	9	1887917	4402395	0.136904	0.342731	697.99	LOC_Os09g06550		retrotransposon protein, putative, unclassified, expressed
CS-KGW-ind-Nip-F1	OD	Chr6_26306993	6	25088750	26615444	0.117285	-0.33541	-2.86312	LOC_Os06g43750		expressed protein
CS-KGW-ind-Nip-F1	D	Chr9_5092554	9	4600898	5607443	0.271027	0.225734	0.864686	LOC_Os09g08970		expressed protein
CS-KGW-ind-Nip-F1	A	Chr7_20905857	7	20905808	20917094	0.383786	0.0502107	0.125244	LOC_Os07g34880		homeobox domain containing protein, expressed
CS-KGW-ind-Nip-F1	OD	Chr5_24842926	5	24639545	26188778	0.039955	-0.379266	-18.6803	LOC_Os05g43830		hydrolase, alpha/beta fold family domain containing protein, expressed
CS-KGW-ind-Nip-F1	OD	Chr9_3482779	9	1887917	4402395	0.136904	0.342731	697.99	LOC_Os09g07154		expressed protein
CS-KGW-ind-Nip-F1	OD	Chr9_1723021	9	242893	1846966	0.115462	0.381992	3.85552	LOC_Os09g03610	OsFCA	flowering time control protein FCA, putative, expressed
CS-KGW-ind-Nip-F1	OD	Chr1_34189260	1	33273845	35114009	0.100901	0.498414	29.5404	LOC_Os01g59430		expressed protein
CS-KGW-ind-Nip-F1	OD	Chr6_26306993	6	25088750	26615444	0.117285	-0.33541	-2.86312	LOC_Os06g42770		type II intron maturase protein, putative, expressed
CS-KGW-ind-Nip-F1	OD	Chr6_27048017	6	26615732	28810505	0.223945	-0.920587	-4.11099	LOC_Os06g44720		transposon protein, putative, CACTA, En/Spm sub-class
CS-KGW-ind-Nip-F1	OD	Chr6_27048017	6	26615732	28810505	0.223945	-0.920587	-4.11099	LOC_Os06g44690		transposon protein, putative, CACTA, En/Spm sub-class, expressed
CS-KGW-ind-Nip-F1	OD	Chr10_14852766	10	13990531	15988580	0.151322	0.347038	2.40609	LOC_Os10g30330		expansin precursor, putative, expressed
CS-KGW-ind-Nip-F1	D	Chr1_25087921	1	24321434	25180566	0.458608	0.484372	1.05661	LOC_Os01g42850	OsATG7	ThiF family domain containing protein, putative, expressed
CS-KGW-ind-Nip-F1	OD	Chr6_7560812	6	7526350	7638154	0.0993589	-0.232949	-2.42269	LOC_Os06g13750		expressed protein
CS-KGW-ind-Nip-F1	D	Chr1_25087921	1	24321434	25180566	0.458608	0.484372	1.05661	LOC_Os01g43520		neutral ceramidase precursor, putative, expressed
CS-KGW-ind-Nip-F1	D	Chr7_4657021	7	4429133	4696757	0.228272	-0.211106	-1.04755	LOC_Os07g08950		FAD-linked oxidoreductase protein, putative, expressed
CS-KGW-ind-Nip-F1	OD	Chr5_24842926	5	24639545	26188778	0.039955	-0.379266	-18.6803	LOC_Os05g42424		ubiquitin family protein, putative, expressed
CS-KGW-ind-Nip-F1	OD	Chr1_21626215	1	21181089	21626226	0.0983217	0.511538	5.31468	LOC_Os01g38480		GA18326-PA, putative, expressed
CS-KGW-ind-Nip-F1	D	Chr1_11472442	1	11384982	11493122	0.263964	0.139763	0.517519	LOC_Os01g20160		OsHKT1;5 - Na+ transporter, expressed
CS-KGW-ind-Nip-F1	OD	Chr3_11990322	3	11907983	12045740	0.096104	0.336847	20.8444	LOC_Os03g21110		emp24/gp25L/p24 family protein, putative, expressed
CS-KGW-ind-Nip-F1	OD	Chr11_18767934	11	18467244	18808992	0.053555	-0.391726	-16.729	LOC_Os11g31870		retrotransposon protein, putative, unclassified, expressed
CS-KGW-ind-Nip-F1	OD	Chr1_34189260	1	33273845	35114009	0.100901	0.498414	29.5404	LOC_Os01g57770		OsPOP4 - Putative Prolyl Oligopeptidase homologue, expressed
CS-KGW-ind-Nip-F1	OD	Chr1_34189260	1	33273845	35114009	0.100901	0.498414	29.5404	LOC_Os01g58580		ICE-like protease p20 domain containing protein, putative, expressed
CS-KGW-ind-Nip-F1	OD	Chr12_3593419	12	3191980	3973292	0.189654	-0.613436	-3.32556	LOC_Os12g07300		N-acetyltransferase 10, putative, expressed
CS-KGW-ind-Nip-F1	D	Chr5_18560285	5	18484312	18567325	0.214817	0.136894	0.666909	LOC_Os05g31890		aspartyl protease family protein, putative, expressed
CS-KGW-ind-Nip-F1	OD	Chr1_34189260	1	33273845	35114009	0.100901	0.498414	29.5404	LOC_Os01g58100		polyphenol oxidase, putative, expressed
CS-KGW-ind-Nip-F1	OD	Chr1_12381977	1	12319860	12583251	0.123808	0.205263	10.6974	LOC_Os01g22030		expressed protein
CS-KGW-ind-Nip-F1	OD	Chr6_27048017	6	26615732	28810505	0.223945	-0.920587	-4.11099	LOC_Os06g44750		AP2 domain containing protein, expressed
CS-KGW-ind-Nip-F1	OD	Chr6_27048017	6	26615732	28810505	0.223945	-0.920587	-4.11099	LOC_Os06g44160		heat shock protein DnaJ, putative, expressed
CS-KGW-ind-Nip-F1	OD	Chr2_5455099	2	5455099	5608781	0.34843	0.577095	1.65931	LOC_Os02g10380		Regulator of chromosome condensation domain containing protein, expressed
CS-KGW-ind-Nip-F1	OD	Chr1_34189260	1	33273845	35114009	0.100901	0.498414	29.5404	LOC_Os01g59550		senescence-induced receptor-like serine/threonine-protein kinase precursor, putative, expressed
CS-KGW-ind-Nip-F1	OD	Chr5_26741137	5	26539686	27105822	0.0570358	-0.290425	-5.27215	LOC_Os05g46110		retrotransposon protein, putative, unclassified, expressed
CS-KGW-ind-Nip-F1	OD	Chr9_1723021	9	242893	1846966	0.115462	0.381992	3.85552	LOC_Os09g02900		transposon protein, putative, unclassified
CS-KGW-ind-Nip-F1	OD	Chr7_1903669	7	1151114	3636304	0.0282891	-0.143014	-28.2043	LOC_Os07g04590		expressed protein
CS-KGW-ind-Nip-F1	A	Chr1_2110625	1	2067818	2145597	0.270956	0.0763654	1.28541	LOC_Os01g04630		muconate cycloisomerase, putative, expressed
CS-KGW-ind-Nip-F1	OD	Chr3_11990322	3	11907983	12045740	0.096104	0.336847	20.8444	LOC_Os03g20980		zinc finger, C3HC4 type domain containing protein, expressed
CS-KGW-ind-Nip-F1	OD	Chr6_26306993	6	25088750	26615444	0.117285	-0.33541	-2.86312	LOC_Os06g43120		zinc finger C-x8-C-x5-C-x3-H type family protein, expressed
CS-KGW-ind-Nip-F1	OD	Chr6_26306993	6	25088750	26615444	0.117285	-0.33541	-2.86312	LOC_Os06g43230		hypothetical protein
CS-KGW-ind-Nip-F1	OD	Chr7_9221254	7	9191117	10563636	0.0930023	-0.33458	-7.44622	LOC_Os07g15820		expressed protein
CS-KGW-ind-Nip-F1	OD	Chr1_34189260	1	33273845	35114009	0.100901	0.498414	29.5404	LOC_Os01g57760		retrotransposon protein, putative, unclassified, expressed
CS-KGW-ind-Nip-F1	OD	Chr7_21694250	7	21694250	21762341	0.101636	0.620744	9.76785	LOC_Os07g36330		OsFBX245 - F-box domain containing protein, expressed
CS-KGW-ind-Nip-F1	OD	Chr8_19642563	8	19362213	19727027	0.0508333	0.559624	173.699	LOC_Os08g31750		methyltransferase, putative, expressed
CS-KGW-ind-Nip-F1	OD	Chr1_34189260	1	33273845	35114009	0.100901	0.498414	29.5404	LOC_Os01g57840		expressed protein
CS-KGW-ind-Nip-F1	OD	Chr1_12381977	1	12319860	12583251	0.123808	0.205263	10.6974	LOC_Os01g22336		peroxidase precursor, putative, expressed
CS-KGW-ind-Nip-F1	OD	Chr9_1723021	9	242893	1846966	0.115462	0.381992	3.85552	LOC_Os09g03640		expressed protein
CS-KGW-ind-Nip-F1	OD	Chr8_11711959	8	11522259	11808059	0.048561	-0.563133	-14.9711	LOC_Os08g19720		retrotransposon protein, putative, Ty3-gypsy subclass, expressed
CS-KGW-ind-Nip-F1	D	Chr4_17900276	4	17831108	18035697	0.269329	-0.347947	-1.3101	LOC_Os04g30020		expressed protein
CS-KGW-ind-Nip-F1	OD	Chr11_23974933	11	22660398	23981966	0.0304683	0.443976	28.0882	LOC_Os11g40160		expressed protein
CS-KGW-ind-Nip-F1	OD	Chr9_3482779	9	1887917	4402395	0.136904	0.342731	697.99	LOC_Os09g04995		expressed protein
CS-KGW-ind-Nip-F1	OD	Chr6_26306993	6	25088750	26615444	0.117285	-0.33541	-2.86312	LOC_Os06g42780		hypothetical protein
CS-KGW-ind-Nip-F1	OD	Chr5_24842926	5	24639545	26188778	0.039955	-0.379266	-18.6803	LOC_Os05g43950		expressed protein
CS-KGW-ind-Nip-F1	OD	Chr11_23974933	11	22660398	23981966	0.0304683	0.443976	28.0882	LOC_Os11g40120		expressed protein
CS-KGW-ind-Nip-F1	A	Chr1_19024229	1	18657904	19130431	0.219399	-0.0887103	0.283055	LOC_Os01g34520		expressed protein
CS-KGW-ind-Nip-F1	OD	Chr10_14852766	10	13990531	15988580	0.151322	0.347038	2.40609	LOC_Os10g30640		translin, putative, expressed
CS-KGW-ind-Nip-F1	OD	Chr8_19642563	8	19362213	19727027	0.0508333	0.559624	173.699	LOC_Os08g31620		expressed protein
CS-KGW-ind-Nip-F1	OD	Chr1_12381977	1	12319860	12583251	0.123808	0.205263	10.6974	LOC_Os01g22249		peroxidase precursor, putative, expressed
CS-KGW-ind-Nip-F1	OD	Chr7_1903669	7	1151114	3636304	0.0282891	-0.143014	-28.2043	LOC_Os07g03820		lectin-like receptor kinase, putative, expressed
CS-KGW-ind-Nip-F1	OD	Chr6_26306993	6	25088750	26615444	0.117285	-0.33541	-2.86312	LOC_Os06g43860		homeobox protein knotted-1, putative, expressed
CS-KGW-ind-Nip-F1	OD	Chr7_9221254	7	9191117	10563636	0.0930023	-0.33458	-7.44622	LOC_Os07g15890		retrotransposon protein, putative, Ty1-copia subclass
CS-KGW-ind-Nip-F1	OD	Chr11_18767934	11	18467244	18808992	0.053555	-0.391726	-16.729	LOC_Os11g31890		NLI interacting factor-like phosphatase, putative, expressed
CS-KGW-ind-Nip-F1	OD	Chr5_24842926	5	24639545	26188778	0.039955	-0.379266	-18.6803	LOC_Os05g42270		acyltransferase, putative, expressed
CS-KGW-ind-Nip-F1	A	Chr1_2110625	1	2067818	2145597	0.270956	0.0763654	1.28541	LOC_Os01g04720		leucine-rich repeat protein-related, putative, expressed
CS-KGW-ind-Nip-F1	OD	Chr8_19642563	8	19362213	19727027	0.0508333	0.559624	173.699	LOC_Os08g31700		UNE2, putative, expressed
CS-KGW-ind-Nip-F1	A	Chr1_2110625	1	2067818	2145597	0.270956	0.0763654	1.28541	LOC_Os01g04690		expressed protein
CS-KGW-ind-Nip-F1	OD	Chr11_18767934	11	18467244	18808992	0.053555	-0.391726	-16.729	LOC_Os11g31715		expressed protein
CS-KGW-ind-Nip-F1	OD	Chr7_1903669	7	1151114	3636304	0.0282891	-0.143014	-28.2043	LOC_Os07g04040		expressed protein
CS-KGW-ind-Nip-F1	A	Chr1_2110625	1	2067818	2145597	0.270956	0.0763654	1.28541	LOC_Os01g04640		reticulon domain containing protein, putative, expressed
CS-KGW-ind-Nip-F1	OD	Chr9_1723021	9	242893	1846966	0.115462	0.381992	3.85552	LOC_Os09g03500		ZOS9-01 - C2H2 zinc finger protein, expressed
CS-KGW-ind-Nip-F1	OD	Chr7_9221254	7	9191117	10563636	0.0930023	-0.33458	-7.44622	LOC_Os07g15840		retrotransposon, putative, centromere-specific, expressed
CS-KGW-ind-Nip-F1	D	Chr9_5092554	9	4600898	5607443	0.271027	0.225734	0.864686	LOC_Os09g09490		disease resistance protein RPM1, putative, expressed
CS-KGW-ind-Nip-F1	D	Chr1_25087921	1	24321434	25180566	0.458608	0.484372	1.05661	LOC_Os01g43860		expressed protein
CS-KGW-ind-Nip-F1	OD	Chr9_1723021	9	242893	1846966	0.115462	0.381992	3.85552	LOC_Os09g03600		immunoglobulin/major histocompatibility complex, putative, expressed
CS-KGW-ind-Nip-F1	OD	Chr5_24442056	5	23611606	24630543	0.0539781	-0.312304	-7.01762	LOC_Os05g41720		retrotransposon protein, putative, unclassified, expressed
CS-KGW-ind-Nip-F1	OD	Chr12_7351607	12	6766950	7382079	0.0404815	-0.406203	-11.4234	LOC_Os12g13250		expressed protein
CS-KGW-ind-Nip-F1	OD	Chr1_34189260	1	33273845	35114009	0.100901	0.498414	29.5404	LOC_Os01g58459		expressed protein
CS-KGW-ind-Nip-F1	OD	Chr11_18767934	11	18467244	18808992	0.053555	-0.391726	-16.729	LOC_Os11g31910		retrotransposon protein, putative, unclassified, expressed
CS-KGW-ind-Nip-F1	OD	Chr9_3482779	9	1887917	4402395	0.136904	0.342731	697.99	LOC_Os09g04310		expressed protein
CS-KGW-ind-Nip-F1	D	Chr5_18560285	5	18484312	18567325	0.214817	0.136894	0.666909	LOC_Os05g31760		annexin, putative, expressed
CS-KGW-ind-Nip-F1	D	Chr9_5092554	9	4600898	5607443	0.271027	0.225734	0.864686	LOC_Os09g08730		pumilio domain-containing protein, putative, expressed
CS-KGW-ind-Nip-F1	OD	Chr1_22393314	1	22391606	22411727	0.162709	-0.325087	-2.01994	LOC_Os01g39720		retrotransposon protein, putative, unclassified, expressed
CS-KGW-ind-Nip-F1	A	Chr1_2110625	1	2067818	2145597	0.270956	0.0763654	1.28541	LOC_Os01g04600		expressed protein
CS-KGW-ind-Nip-F1	OD	Chr11_18858858	11	18822708	18991120	0.0810101	-0.311568	-4.42967	LOC_Os11g32030		sex determination protein tasselseed-2, putative, expressed
CS-KGW-ind-Nip-F1	OD	Chr11_23974933	11	22660398	23981966	0.0304683	0.443976	28.0882	LOC_Os11g40200		expressed protein
CS-KGW-ind-Nip-F1	OD	Chr2_799133	2	459859	799133	0.244197	-0.657779	-3.16202	LOC_Os02g02110		Alg9-like mannosyltransferase protein, putative, expressed
CS-KGW-ind-Nip-F1	OD	Chr12_3593419	12	3191980	3973292	0.189654	-0.613436	-3.32556	LOC_Os12g06610		nucleolar complex protein 2, putative, expressed
CS-KGW-ind-Nip-F1	OD	Chr8_20198995	8	20081023	20204167	0.0228867	0.434722	31.3129	LOC_Os08g32620		ES43 protein, putative, expressed
CS-KGW-ind-Nip-F1	A	Chr1_19024229	1	18657904	19130431	0.219399	-0.0887103	0.283055	LOC_Os01g34570		retrotransposon protein, putative, Ty1-copia subclass
CS-KGW-ind-Nip-F1	OD	Chr6_27048017	6	26615732	28810505	0.223945	-0.920587	-4.11099	LOC_Os06g44540		HOTHEAD precursor, putative, expressed
CS-KGW-ind-Nip-F1	OD	Chr10_14852766	10	13990531	15988580	0.151322	0.347038	2.40609	LOC_Os10g28420		IQ calmodulin-binding motif family protein, putative, expressed
CS-KGW-ind-Nip-F1	OD	Chr12_7351607	12	6766950	7382079	0.0404815	-0.406203	-11.4234	LOC_Os12g12934		peptide transporter PTR3-A, putative, expressed
CS-KGW-ind-Nip-F1	OD	Chr9_3482779	9	1887917	4402395	0.136904	0.342731	697.99	LOC_Os09g03790		expressed protein
CS-KGW-ind-Nip-F1	OD	Chr6_27048017	6	26615732	28810505	0.223945	-0.920587	-4.11099	LOC_Os06g44230		DNA-directed RNA polymerase 3A, chloroplast precursor, putative, expressed
CS-KGW-ind-Nip-F1	OD	Chr10_2496374	10	2442284	2547542	0.161757	0.438281	3.42669	LOC_Os10g05088		GDSL-like lipase/acylhydrolase, putative, expressed
CS-KGW-ind-Nip-F1	OD	Chr7_1903669	7	1151114	3636304	0.0282891	-0.143014	-28.2043	LOC_Os07g04150		stress-induced protein, putative, expressed
CS-KGW-ind-Nip-F1	OD	Chr6_7560812	6	7526350	7638154	0.0993589	-0.232949	-2.42269	LOC_Os06g13770		transposon protein, putative, unclassified
CS-KGW-ind-Nip-F1	OD	Chr7_1042169	7	941547	1115993	0.0739171	-0.496861	-9.85862	LOC_Os07g02990		expressed protein
CS-KGW-ind-Nip-F1	OD	Chr8_19642563	8	19362213	19727027	0.0508333	0.559624	173.699	LOC_Os08g31290		expressed protein
CS-KGW-ind-Nip-F1	OD	Chr7_20550334	7	20529238	20561638	0.189421	0.716912	3.75668	LOC_Os07g34320		nodulin, putative, expressed
CS-KGW-ind-Nip-F1	OD	Chr6_7560812	6	7526350	7638154	0.0993589	-0.232949	-2.42269	LOC_Os06g13660		alanyl-tRNA synthetase, putative, expressed
CS-KGW-ind-Nip-F1	OD	Chr6_27048017	6	26615732	28810505	0.223945	-0.920587	-4.11099	LOC_Os06g45140		bZIP transcription factor domain containing protein, expressed
CS-KGW-ind-Nip-F1	OD	Chr12_9485829	12	9478290	9577763	0.066541	-0.407878	-6.40482	LOC_Os12g16570		hypothetical protein
CS-KGW-ind-Nip-F1	OD	Chr6_26306993	6	25088750	26615444	0.117285	-0.33541	-2.86312	LOC_Os06g43640		Ser/Thr protein phosphatase family protein, putative, expressed
CS-KGW-ind-Nip-F1	OD	Chr9_1723021	9	242893	1846966	0.115462	0.381992	3.85552	LOC_Os09g02690		expressed protein
CS-KGW-ind-Nip-F1	OD	Chr2_5455099	2	5455099	5608781	0.34843	0.577095	1.65931	LOC_Os02g10450		expressed protein
CS-KGW-ind-Nip-F1	OD	Chr12_7351607	12	6766950	7382079	0.0404815	-0.406203	-11.4234	LOC_Os12g12664		expressed protein
CS-KGW-ind-Nip-F1	OD	Chr10_14852766	10	13990531	15988580	0.151322	0.347038	2.40609	LOC_Os10g30270		retrotransposon, putative, centromere-specific, expressed
CS-KGW-ind-Nip-F1	OD	Chr5_24842926	5	24639545	26188778	0.039955	-0.379266	-18.6803	LOC_Os05g42360		expressed protein
CS-KGW-ind-Nip-F1	OD	Chr5_24842926	5	24639545	26188778	0.039955	-0.379266	-18.6803	LOC_Os05g42436		hypothetical protein
CS-KGW-ind-Nip-F1	OD	Chr5_26741137	5	26539686	27105822	0.0570358	-0.290425	-5.27215	LOC_Os05g46150		OsFBDUF28 - F-box and DUF domain containing protein, expressed
CS-KGW-ind-Nip-F1	OD	Chr1_34189260	1	33273845	35114009	0.100901	0.498414	29.5404	LOC_Os01g57940		tyrosine protein kinase domain containing protein, putative, expressed
CS-KGW-ind-Nip-F1	OD	Chr1_34189260	1	33273845	35114009	0.100901	0.498414	29.5404	LOC_Os01g57942		cytochrome b6, putative, expressed
CS-KGW-ind-Nip-F1	OD	Chr1_22526716	1	22411877	22884023	0.258656	-0.394802	-1.53407	LOC_Os01g39970		protein kinase domain containing protein, putative, expressed
CS-KGW-ind-Nip-F1	OD	Chr10_14852766	10	13990531	15988580	0.151322	0.347038	2.40609	LOC_Os10g28780		MBTB35 - Bric-a-Brac, Tramtrack, Broad Complex BTB domain with Meprin and TRAF Homology MATH domain, expressed
CS-KGW-ind-Nip-F1	OD	Chr9_3482779	9	1887917	4402395	0.136904	0.342731	697.99	LOC_Os09g07230		retrotransposon protein, putative, unclassified, expressed
CS-KGW-ind-Nip-F1	OD	Chr6_27048017	6	26615732	28810505	0.223945	-0.920587	-4.11099	LOC_Os06g44840		prenyltransferase, putative, expressed
CS-KGW-ind-Nip-F1	OD	Chr6_27048017	6	26615732	28810505	0.223945	-0.920587	-4.11099	LOC_Os06g44990		transposon protein, putative, Pong sub-class
CS-KGW-ind-Nip-F1	OD	Chr12_5454811	12	4505329	6751723	0.0406094	-0.34896	-23.9995	LOC_Os12g10184		pentatricopeptide, putative, expressed
CS-KGW-ind-Nip-F1	OD	Chr8_20047758	8	20021659	20074567	0.104638	0.374142	3.75613	LOC_Os08g32330		expressed protein
CS-KGW-ind-Nip-F1	OD	Chr1_22526716	1	22411877	22884023	0.258656	-0.394802	-1.53407	LOC_Os01g39890		transposon protein, putative, unclassified, expressed
CS-KGW-ind-Nip-F1	OD	Chr9_3482779	9	1887917	4402395	0.136904	0.342731	697.99	LOC_Os09g07580		mla1, putative, expressed
CS-KGW-ind-Nip-F1	OD	Chr1_34189260	1	33273845	35114009	0.100901	0.498414	29.5404	LOC_Os01g59440		BRASSINOSTEROID INSENSITIVE 1-associated receptor kinase 1 precursor, putative, expressed
CS-KGW-ind-Nip-F1	OD	Chr1_22526716	1	22411877	22884023	0.258656	-0.394802	-1.53407	LOC_Os01g39820		expressed protein
CS-KGW-ind-Nip-F1	OD	Chr1_34189260	1	33273845	35114009	0.100901	0.498414	29.5404	LOC_Os01g59300		expressed protein
CS-KGW-ind-Nip-F1	OD	Chr9_1723021	9	242893	1846966	0.115462	0.381992	3.85552	LOC_Os09g03120		expressed protein
CS-KGW-ind-Nip-F1	OD	Chr3_11990322	3	11907983	12045740	0.096104	0.336847	20.8444	LOC_Os03g21000		thioredoxin, putative, expressed
CS-KGW-ind-Nip-F1	OD	Chr1_34189260	1	33273845	35114009	0.100901	0.498414	29.5404	LOC_Os01g58600		expressed protein
CS-KGW-ind-Nip-F1	OD	Chr9_1723021	9	242893	1846966	0.115462	0.381992	3.85552	LOC_Os09g02490		transposon protein, putative, CACTA, En/Spm sub-class, expressed
CS-KGW-ind-Nip-F1	OD	Chr7_1903669	7	1151114	3636304	0.0282891	-0.143014	-28.2043	LOC_Os07g04820		protein kinase, putative, expressed
CS-KGW-ind-Nip-F1	OD	Chr7_1903669	7	1151114	3636304	0.0282891	-0.143014	-28.2043	LOC_Os07g03240		RNA recognition motif containing protein, putative, expressed
CS-KGW-ind-Nip-F1	OD	Chr11_18858858	11	18822708	18991120	0.0810101	-0.311568	-4.42967	LOC_Os11g32000		retrotransposon protein, putative, unclassified, expressed
CS-KGW-ind-Nip-F1	OD	Chr1_34189260	1	33273845	35114009	0.100901	0.498414	29.5404	LOC_Os01g58820		retrotransposon protein, putative, Ty1-copia subclass, expressed
CS-KGW-ind-Nip-F1	OD	Chr12_3593419	12	3191980	3973292	0.189654	-0.613436	-3.32556	LOC_Os12g06590		retrotransposon protein, putative, Ty1-copia subclass
CS-KGW-ind-Nip-F1	OD	Chr1_21626215	1	21181089	21626226	0.0983217	0.511538	5.31468	LOC_Os01g37842		expressed protein
CS-KGW-ind-Nip-F1	OD	Chr7_1903669	7	1151114	3636304	0.0282891	-0.143014	-28.2043	LOC_Os07g04240		succinate dehydrogenase flavoprotein subunit,mitochondrial precursor, putative, expressed
CS-KGW-ind-Nip-F1	OD	Chr9_1723021	9	242893	1846966	0.115462	0.381992	3.85552	LOC_Os09g01310		expressed protein
CS-KGW-ind-Nip-F1	OD	Chr12_9485829	12	9478290	9577763	0.066541	-0.407878	-6.40482	LOC_Os12g16540		OsWAK124 - OsWAK receptor-like protein OsWAK-RLP, expressed
CS-KGW-ind-Nip-F1	OD	Chr12_5454811	12	4505329	6751723	0.0406094	-0.34896	-23.9995	LOC_Os12g09150		retrotransposon protein, putative, unclassified
CS-KGW-ind-Nip-F1	OD	Chr9_3482779	9	1887917	4402395	0.136904	0.342731	697.99	LOC_Os09g04750		retrotransposon protein, putative, Ty3-gypsy subclass, expressed
CS-KGW-ind-Nip-F1	OD	Chr6_27048017	6	26615732	28810505	0.223945	-0.920587	-4.11099	LOC_Os06g44270		synthase, putative, expressed
CS-KGW-ind-Nip-F1	OD	Chr12_7351607	12	6766950	7382079	0.0404815	-0.406203	-11.4234	LOC_Os12g12580		NADP-dependent oxidoreductase, putative, expressed
CS-KGW-ind-Nip-F1	OD	Chr1_34189260	1	33273845	35114009	0.100901	0.498414	29.5404	LOC_Os01g58114		expressed protein
CS-KGW-ind-Nip-F1	A	Chr1_2110625	1	2067818	2145597	0.270956	0.0763654	1.28541	LOC_Os01g04670		expressed protein
CS-KGW-ind-Nip-F1	OD	Chr1_34189260	1	33273845	35114009	0.100901	0.498414	29.5404	LOC_Os01g57880		plastocyanin-like domain containing protein, putative, expressed
CS-KGW-ind-Nip-F1	D	Chr3_35485290	3	35485290	35508956	0.123124	-0.0753727	-0.613162	LOC_Os03g62730		transposon protein, putative, unclassified, expressed
CS-KGW-ind-Nip-F1	OD	Chr6_6606495	6	6593476	6624750	0.104344	0.708541	7.75193	LOC_Os06g12260		N-rich protein, putative, expressed
CS-KGW-ind-Nip-F1	OD	Chr9_3482779	9	1887917	4402395	0.136904	0.342731	697.99	LOC_Os09g07280		expressed protein
CS-KGW-ind-Nip-F1	D	Chr9_5092554	9	4600898	5607443	0.271027	0.225734	0.864686	LOC_Os09g09480		SNF7 domain containing protein, putative, expressed
CS-KGW-ind-Nip-F1	OD	Chr6_27048017	6	26615732	28810505	0.223945	-0.920587	-4.11099	LOC_Os06g44180		NAD dependent epimerase/dehydratase family protein, putative, expressed
CS-KGW-ind-Nip-F1	OD	Chr1_12381977	1	12319860	12583251	0.123808	0.205263	10.6974	LOC_Os01g22380		expressed protein
CS-KGW-ind-Nip-F1	OD	Chr9_1723021	9	242893	1846966	0.115462	0.381992	3.85552	LOC_Os09g03490		carboxylic ester hydrolase, putative, expressed
CS-KGW-ind-Nip-F1	OD	Chr1_34189260	1	33273845	35114009	0.100901	0.498414	29.5404	LOC_Os01g59040		expressed protein
CS-KGW-ind-Nip-F1	D	Chr5_18560285	5	18484312	18567325	0.214817	0.136894	0.666909	LOC_Os05g31810		retrotransposon protein, putative, unclassified
CS-KGW-ind-Nip-F1	D	Chr9_5092554	9	4600898	5607443	0.271027	0.225734	0.864686	LOC_Os09g09220		protein kinase domain containing protein, expressed
CS-KGW-ind-Nip-F1	OD	Chr9_1723021	9	242893	1846966	0.115462	0.381992	3.85552	LOC_Os09g02140		expressed protein
CS-KGW-ind-Nip-F1	OD	Chr7_21367969	7	21108209	21604753	0.417065	0.843367	2.06522	LOC_Os07g36160		expressed protein
CS-KGW-ind-Nip-F1	OD	Chr7_1042169	7	941547	1115993	0.0739171	-0.496861	-9.85862	LOC_Os07g02720		expressed protein
CS-KGW-ind-Nip-F1	D	Chr9_5092554	9	4600898	5607443	0.271027	0.225734	0.864686	LOC_Os09g10170		retrotransposon protein, putative, Ty3-gypsy subclass, expressed
CS-KGW-ind-Nip-F1	OD	Chr7_21367969	7	21108209	21604753	0.417065	0.843367	2.06522	LOC_Os07g35810		TKL_IRAK_DUF26-ld.6 - DUF26 kinases have homology to DUF26 containing loci, expressed
CS-KGW-ind-Nip-F1	OD	Chr6_27048017	6	26615732	28810505	0.223945	-0.920587	-4.11099	LOC_Os06g45150		pollen allergen, putative, expressed
CS-KGW-ind-Nip-F1	OD	Chr5_26741137	5	26539686	27105822	0.0570358	-0.290425	-5.27215	LOC_Os05g46180		expressed protein
CS-KGW-ind-Nip-F1	OD	Chr7_1903669	7	1151114	3636304	0.0282891	-0.143014	-28.2043	LOC_Os07g03750		SCP-like extracellular protein, expressed
CS-KGW-ind-Nip-F1	OD	Chr11_18767934	11	18467244	18808992	0.053555	-0.391726	-16.729	LOC_Os11g31860		retrotransposon protein, putative, unclassified, expressed
CS-KGW-ind-Nip-F1	OD	Chr1_34189260	1	33273845	35114009	0.100901	0.498414	29.5404	LOC_Os01g59050		cytochrome P450, putative, expressed
CS-KGW-ind-Nip-F1	OD	Chr9_3482779	9	1887917	4402395	0.136904	0.342731	697.99	LOC_Os09g04120		expressed protein
CS-KGW-ind-Nip-F1	OD	Chr6_27048017	6	26615732	28810505	0.223945	-0.920587	-4.11099	LOC_Os06g45170		retrotransposon protein, putative, unclassified, expressed
CS-KGW-ind-Nip-F1	OD	Chr7_1903669	7	1151114	3636304	0.0282891	-0.143014	-28.2043	LOC_Os07g04790		OsFBX215 - F-box domain containing protein, expressed
CS-KGW-ind-Nip-F1	OD	Chr7_1903669	7	1151114	3636304	0.0282891	-0.143014	-28.2043	LOC_Os07g04170		OsMADS90 - MADS-box family gene with M-beta type-box, expressed
CS-KGW-ind-Nip-F1	OD	Chr8_20198995	8	20081023	20204167	0.0228867	0.434722	31.3129	LOC_Os08g32540		cyclin, putative, expressed
CS-KGW-ind-Nip-F1	OD	Chr6_27048017	6	26615732	28810505	0.223945	-0.920587	-4.11099	LOC_Os06g44210		protein phosphatase 2C, putative, expressed
CS-KGW-ind-Nip-F1	OD	Chr9_1723021	9	242893	1846966	0.115462	0.381992	3.85552	LOC_Os09g02750		expressed protein
CS-KGW-ind-Nip-F1	OD	Chr6_26306993	6	25088750	26615444	0.117285	-0.33541	-2.86312	LOC_Os06g43650		secreted salivary protein, putative, expressed
CS-KGW-ind-Nip-F1	OD	Chr1_22393314	1	22391606	22411727	0.162709	-0.325087	-2.01994	LOC_Os01g39730		retrotransposon protein, putative, unclassified, expressed
CS-KGW-ind-Nip-F1	OD	Chr9_3482779	9	1887917	4402395	0.136904	0.342731	697.99	LOC_Os09g07360		frigida, putative, expressed
CS-KGW-ind-Nip-F1	OD	Chr1_22393314	1	22391606	22411727	0.162709	-0.325087	-2.01994	LOC_Os01g39700		expressed protein
CS-KGW-ind-Nip-F1	OD	Chr1_34189260	1	33273845	35114009	0.100901	0.498414	29.5404	LOC_Os01g58160		expressed protein
CS-KGW-ind-Nip-F1	OD	Chr1_22526716	1	22411877	22884023	0.258656	-0.394802	-1.53407	LOC_Os01g40499		S-locus lectin protein kinase family protein, putative, expressed
CS-KGW-ind-Nip-F1	OD	Chr6_7560812	6	7526350	7638154	0.0993589	-0.232949	-2.42269	LOC_Os06g13670		E2F family transcription factor protein, putative, expressed
CS-KGW-ind-Nip-F1	OD	Chr5_24842926	5	24639545	26188778	0.039955	-0.379266	-18.6803	LOC_Os05g44890		retrotransposon protein, putative, unclassified, expressed
CS-KGW-ind-Nip-F1	OD	Chr6_6606495	6	6593476	6624750	0.104344	0.708541	7.75193	LOC_Os06g12270		hypothetical protein
CS-KGW-ind-Nip-F1	OD	Chr7_21367969	7	21108209	21604753	0.417065	0.843367	2.06522	LOC_Os07g35260		TKL_IRAK_DUF26-lc.9 - DUF26 kinases have homology to DUF26 containing loci, expressed
CS-KGW-ind-Nip-F1	OD	Chr12_3593419	12	3191980	3973292	0.189654	-0.613436	-3.32556	LOC_Os12g07260		PPR repeat domain containing protein, putative, expressed
CS-KGW-ind-Nip-F1	OD	Chr6_27048017	6	26615732	28810505	0.223945	-0.920587	-4.11099	LOC_Os06g44150		CorA-like magnesium transporter protein, putative, expressed
CS-KGW-ind-Nip-F1	OD	Chr12_9485829	12	9478290	9577763	0.066541	-0.407878	-6.40482	LOC_Os12g16600		expressed protein
CS-KGW-ind-Nip-F1	OD	Chr1_34189260	1	33273845	35114009	0.100901	0.498414	29.5404	LOC_Os01g58540		expressed protein
CS-KGW-ind-Nip-F1	OD	Chr5_24842926	5	24639545	26188778	0.039955	-0.379266	-18.6803	LOC_Os05g43050		expressed protein
CS-KGW-ind-Nip-F1	OD	Chr9_3482779	9	1887917	4402395	0.136904	0.342731	697.99	LOC_Os09g04360		expressed protein
CS-KGW-ind-Nip-F1	OD	Chr9_1723021	9	242893	1846966	0.115462	0.381992	3.85552	LOC_Os09g03650		transposon protein, putative, unclassified, expressed
CS-KGW-ind-Nip-F1	OD	Chr9_1723021	9	242893	1846966	0.115462	0.381992	3.85552	LOC_Os09g02480		hypothetical protein
CS-KGW-ind-Nip-F1	D	Chr5_18560285	5	18484312	18567325	0.214817	0.136894	0.666909	LOC_Os05g31800		hypothetical protein
CS-KGW-ind-Nip-F1	OD	Chr2_799133	2	459859	799133	0.244197	-0.657779	-3.16202	LOC_Os02g01840		retrotransposon protein, putative, unclassified, expressed
CS-KGW-ind-Nip-F1	OD	Chr12_5454811	12	4505329	6751723	0.0406094	-0.34896	-23.9995	LOC_Os12g09130		expressed protein
CS-KGW-ind-Nip-F1	OD	Chr6_26306993	6	25088750	26615444	0.117285	-0.33541	-2.86312	LOC_Os06g41840		reductase, putative, expressed
CS-KGW-ind-Nip-F1	OD	Chr6_7560812	6	7526350	7638154	0.0993589	-0.232949	-2.42269	LOC_Os06g13630		transposon protein, putative, Mutator sub-class, expressed
CS-KGW-ind-Nip-F1	OD	Chr12_5454811	12	4505329	6751723	0.0406094	-0.34896	-23.9995	LOC_Os12g10820		expressed protein
CS-KGW-ind-Nip-F1	OD	Chr6_26306993	6	25088750	26615444	0.117285	-0.33541	-2.86312	LOC_Os06g43770		expressed protein
CS-KGW-ind-Nip-F1	D	Chr1_31632365	1	31274992	31632365	0.33624	0.330846	1.01233	LOC_Os01g54930		one zinc finger protein, putative, expressed
CS-KGW-ind-Nip-F1	A	Chr1_15549537	1	15436448	16685539	0.214283	0.0828974	0.331972	LOC_Os01g29140		retrotransposon protein, putative, unclassified, expressed
CS-KGW-ind-Nip-F1	OD	Chr10_14852766	10	13990531	15988580	0.151322	0.347038	2.40609	LOC_Os10g29590		hypothetical protein
CS-KGW-ind-Nip-F1	OD	Chr1_12381977	1	12319860	12583251	0.123808	0.205263	10.6974	LOC_Os01g22100		retrotransposon protein, putative, unclassified, expressed
CS-KGW-ind-Nip-F1	A	Chr1_2110625	1	2067818	2145597	0.270956	0.0763654	1.28541	LOC_Os01g04740		hypothetical protein
CS-KGW-ind-Nip-F1	OD	Chr11_18858858	11	18822708	18991120	0.0810101	-0.311568	-4.42967	LOC_Os11g32060		retrotransposon protein, putative, unclassified, expressed
CS-KGW-ind-Nip-F1	OD	Chr9_1723021	9	242893	1846966	0.115462	0.381992	3.85552	LOC_Os09g02060		expressed protein
CS-KGW-ind-Nip-F1	D	Chr9_5092554	9	4600898	5607443	0.271027	0.225734	0.864686	LOC_Os09g08770		expressed protein
CS-KGW-ind-Nip-F1	D	Chr7_4657021	7	4429133	4696757	0.228272	-0.211106	-1.04755	LOC_Os07g09010		nodulin, putative, expressed
CS-KGW-ind-Nip-F1	OD	Chr1_34189260	1	33273845	35114009	0.100901	0.498414	29.5404	LOC_Os01g59980		zinc finger family protein, putative, expressed
CS-KGW-ind-Nip-F1	OD	Chr12_5454811	12	4505329	6751723	0.0406094	-0.34896	-23.9995	LOC_Os12g08950		retrotransposon, putative, centromere-specific, expressed
CS-KGW-ind-Nip-F1	OD	Chr7_1903669	7	1151114	3636304	0.0282891	-0.143014	-28.2043	LOC_Os07g04220		wound and phytochrome signaling involved receptor like kinase, putative, expressed
CS-KGW-ind-Nip-F1	OD	Chr9_1723021	9	242893	1846966	0.115462	0.381992	3.85552	LOC_Os09g02680		retrotransposon protein, putative, unclassified
CS-KGW-ind-Nip-F1	OD	Chr9_3482779	9	1887917	4402395	0.136904	0.342731	697.99	LOC_Os09g07170		retrotransposon protein, putative, unclassified, expressed
CS-KGW-ind-Nip-F1	D	Chr1_11472442	1	11384982	11493122	0.263964	0.139763	0.517519	LOC_Os01g20170		expressed protein
CS-KGW-ind-Nip-F1	OD	Chr8_19642563	8	19362213	19727027	0.0508333	0.559624	173.699	LOC_Os08g31680		retrotransposon protein, putative, unclassified, expressed
CS-KGW-ind-Nip-F1	D	Chr3_35485290	3	35485290	35508956	0.123124	-0.0753727	-0.613162	LOC_Os03g62700		protein kinase, putative, expressed
CS-KGW-ind-Nip-F1	OD	Chr1_34189260	1	33273845	35114009	0.100901	0.498414	29.5404	LOC_Os01g57930		CDP-alcohol phosphatidyltransferase, putative, expressed
CS-KGW-ind-Nip-F1	OD	Chr12_5454811	12	4505329	6751723	0.0406094	-0.34896	-23.9995	LOC_Os12g10410		NB-ARC/LRR disease resistance protein, putative, expressed
CS-KGW-ind-Nip-F1	OD	Chr9_1723021	9	242893	1846966	0.115462	0.381992	3.85552	LOC_Os09g03350		retrotransposon protein, putative, Ty3-gypsy subclass
CS-KGW-ind-Nip-F1	OD	Chr1_34189260	1	33273845	35114009	0.100901	0.498414	29.5404	LOC_Os01g57580		bHelix-loop-helix transcription factor, putative, expressed
CS-KGW-ind-Nip-F1	OD	Chr1_34189260	1	33273845	35114009	0.100901	0.498414	29.5404	LOC_Os01g58444		expressed protein
CS-KGW-ind-Nip-F1	OD	Chr1_34189260	1	33273845	35114009	0.100901	0.498414	29.5404	LOC_Os01g58590		expressed protein
CS-KGW-ind-Nip-F1	OD	Chr7_1903669	7	1151114	3636304	0.0282891	-0.143014	-28.2043	LOC_Os07g04310		expressed protein
CS-KGW-ind-Nip-F1	OD	Chr11_10603699	11	10477513	10604423	0.230599	-0.586382	-2.72044	LOC_Os11g18690		glycosyl hydrolase family 3 protein, putative, expressed
CS-KGW-ind-Nip-F1	OD	Chr7_1903669	7	1151114	3636304	0.0282891	-0.143014	-28.2043	LOC_Os07g03720		retrotransposon protein, putative, Ty1-copia subclass, expressed
CS-KGW-ind-Nip-F1	OD	Chr1_34189260	1	33273845	35114009	0.100901	0.498414	29.5404	LOC_Os01g58480		expressed protein
CS-KGW-ind-Nip-F1	OD	Chr6_27048017	6	26615732	28810505	0.223945	-0.920587	-4.11099	LOC_Os06g44950		retrotransposon protein, putative, unclassified, expressed
CS-KGW-ind-Nip-F1	OD	Chr9_1723021	9	242893	1846966	0.115462	0.381992	3.85552	LOC_Os09g02940		retrotransposon protein, putative, Ty3-gypsy subclass, expressed
CS-KGW-ind-Nip-F1	OD	Chr1_34189260	1	33273845	35114009	0.100901	0.498414	29.5404	LOC_Os01g59340		dihydropyrimidinase, putative, expressed
CS-KGW-ind-Nip-F1	OD	Chr6_862621	6	772145	1150169	0.0462894	-0.248834	-6.85162	LOC_Os06g02490		acyl CoA binding protein, putative, expressed
CS-KGW-ind-Nip-F1	OD	Chr1_22526716	1	22411877	22884023	0.258656	-0.394802	-1.53407	LOC_Os01g39780		expressed protein
CS-KGW-ind-Nip-F1	OD	Chr1_34189260	1	33273845	35114009	0.100901	0.498414	29.5404	LOC_Os01g58690		endonuclease/exonuclease/phosphatase family domain containing protein, expressed
CS-KGW-ind-Nip-F1	OD	Chr5_24842926	5	24639545	26188778	0.039955	-0.379266	-18.6803	LOC_Os05g42350		ferredoxin--nitrite reductase, putative, expressed
CS-KGW-ind-Nip-F1	OD	Chr11_18858858	11	18822708	18991120	0.0810101	-0.311568	-4.42967	LOC_Os11g32020		expressed protein
CS-KGW-ind-Nip-F1	OD	Chr7_1042169	7	941547	1115993	0.0739171	-0.496861	-9.85862	LOC_Os07g02730		expressed protein
CS-KGW-ind-Nip-F1	OD	Chr6_7560812	6	7526350	7638154	0.0993589	-0.232949	-2.42269	LOC_Os06g13650		alpha-mannosidase 2, putative, expressed
CS-KGW-ind-Nip-F1	OD	Chr9_3482779	9	1887917	4402395	0.136904	0.342731	697.99	LOC_Os09g07680		retrotransposon protein, putative, Ty3-gypsy subclass, expressed
CS-KGW-ind-Nip-F1	OD	Chr1_22526716	1	22411877	22884023	0.258656	-0.394802	-1.53407	LOC_Os01g39940		transposon protein, putative, unclassified
CS-KGW-ind-Nip-F1	OD	Chr9_3482779	9	1887917	4402395	0.136904	0.342731	697.99	LOC_Os09g07510		HEAT repeat family protein, putative, expressed
CS-KGW-ind-Nip-F1	OD	Chr1_34189260	1	33273845	35114009	0.100901	0.498414	29.5404	LOC_Os01g59970		expressed protein
CS-KGW-ind-Nip-F1	OD	Chr9_1723021	9	242893	1846966	0.115462	0.381992	3.85552	LOC_Os09g02950		retrotransposon protein, putative, unclassified, expressed
CS-KGW-ind-Nip-F1	OD	Chr12_3593419	12	3191980	3973292	0.189654	-0.613436	-3.32556	LOC_Os12g06600		retrotransposon protein, putative, Ty1-copia subclass, expressed
CS-KGW-ind-Nip-F1	OD	Chr1_22526716	1	22411877	22884023	0.258656	-0.394802	-1.53407	LOC_Os01g39840		expressed protein
CS-KGW-ind-Nip-F1	OD	Chr7_1042169	7	941547	1115993	0.0739171	-0.496861	-9.85862	LOC_Os07g02970		expressed protein
CS-KGW-ind-Nip-F1	OD	Chr7_1903669	7	1151114	3636304	0.0282891	-0.143014	-28.2043	LOC_Os07g04470		GRF zinc finger family protein
CS-KGW-ind-Nip-F1	D	Chr1_25087921	1	24321434	25180566	0.458608	0.484372	1.05661	LOC_Os01g42790		xylem cysteine proteinase 2 precursor, putative, expressed
CS-KGW-ind-Nip-F1	D	Chr9_5092554	9	4600898	5607443	0.271027	0.225734	0.864686	LOC_Os09g09944		expressed protein
CS-KGW-ind-Nip-F1	D	Chr1_31632365	1	31274992	31632365	0.33624	0.330846	1.01233	LOC_Os01g54870		60S ribosomal protein L18a, putative, expressed
CS-KGW-ind-Nip-F1	OD	Chr10_14852766	10	13990531	15988580	0.151322	0.347038	2.40609	LOC_Os10g28540		CAF1 family ribonuclease containing protein, expressed
CS-KGW-ind-Nip-F1	D	Chr9_5092554	9	4600898	5607443	0.271027	0.225734	0.864686	LOC_Os09g09000		transposon protein, putative, CACTA, En/Spm sub-class, expressed
CS-KGW-ind-Nip-F1	OD	Chr11_23974933	11	22660398	23981966	0.0304683	0.443976	28.0882	LOC_Os11g40130		expressed protein
CS-KGW-ind-Nip-F1	OD	Chr11_18767934	11	18467244	18808992	0.053555	-0.391726	-16.729	LOC_Os11g31930		expressed protein
CS-KGW-ind-Nip-F1	OD	Chr7_1903669	7	1151114	3636304	0.0282891	-0.143014	-28.2043	LOC_Os07g04890		expressed protein
CS-KGW-ind-Nip-F1	OD	Chr7_20550334	7	20529238	20561638	0.189421	0.716912	3.75668	LOC_Os07g34300		retrotransposon protein, putative, unclassified
CS-KGW-ind-Nip-F1	OD	Chr10_14852766	10	13990531	15988580	0.151322	0.347038	2.40609	LOC_Os10g29470		dehydrogenase, putative, expressed
CS-KGW-ind-Nip-F1	D	Chr1_25087921	1	24321434	25180566	0.458608	0.484372	1.05661	LOC_Os01g43410		CAMK_CAMK_like.9 - CAMK includes calcium/calmodulin depedent protein kinases, expressed
CS-KGW-ind-Nip-F1	OD	Chr2_799133	2	459859	799133	0.244197	-0.657779	-3.16202	LOC_Os02g01830		expressed protein
CS-KGW-ind-Nip-F1	OD	Chr7_1903669	7	1151114	3636304	0.0282891	-0.143014	-28.2043	LOC_Os07g04050		expressed protein
CS-KGW-ind-Nip-F1	OD	Chr5_24442056	5	23611606	24630543	0.0539781	-0.312304	-7.01762	LOC_Os05g40200		inactive receptor kinase At2g26730 precursor, putative, expressed
CS-KGW-ind-Nip-F1	D	Chr9_5092554	9	4600898	5607443	0.271027	0.225734	0.864686	LOC_Os09g08820		transposon protein, putative, CACTA, En/Spm sub-class, expressed
CS-KGW-ind-Nip-F1	OD	Chr1_34189260	1	33273845	35114009	0.100901	0.498414	29.5404	LOC_Os01g58810		retrotransposon protein, putative, Ty1-copia subclass, expressed
CS-KGW-ind-Nip-F1	OD	Chr6_27048017	6	26615732	28810505	0.223945	-0.920587	-4.11099	LOC_Os06g44870		expressed protein
CS-KGW-ind-Nip-F1	A	Chr1_19024229	1	18657904	19130431	0.219399	-0.0887103	0.283055	LOC_Os01g34680		expressed protein
CS-KGW-ind-Nip-F1	OD	Chr11_18767934	11	18467244	18808992	0.053555	-0.391726	-16.729	LOC_Os11g31680		retrotransposon protein, putative, unclassified, expressed
CS-KGW-ind-Nip-F1	OD	Chr9_1723021	9	242893	1846966	0.115462	0.381992	3.85552	LOC_Os09g01530		retrotransposon protein, putative, Ty3-gypsy subclass, expressed
CS-KGW-ind-Nip-F1	OD	Chr12_5454811	12	4505329	6751723	0.0406094	-0.34896	-23.9995	LOC_Os12g09640		protein phosphatase 2C, putative, expressed
CS-KGW-ind-Nip-F1	OD	Chr11_18767934	11	18467244	18808992	0.053555	-0.391726	-16.729	LOC_Os11g31650		expressed protein
CS-KGW-ind-Nip-F1	OD	Chr7_1042169	7	941547	1115993	0.0739171	-0.496861	-9.85862	LOC_Os07g02674		expressed protein
CS-KGW-ind-Nip-F1	OD	Chr1_34189260	1	33273845	35114009	0.100901	0.498414	29.5404	LOC_Os01g58420		AP2 domain containing protein, expressed
CS-KGW-ind-Nip-F1	OD	Chr9_3482779	9	1887917	4402395	0.136904	0.342731	697.99	LOC_Os09g07130		retrotransposon protein, putative, unclassified, expressed
CS-KGW-ind-Nip-F1	OD	Chr11_18858858	11	18822708	18991120	0.0810101	-0.311568	-4.42967	LOC_Os11g32010		expressed protein
CS-KGW-ind-Nip-F1	OD	Chr5_20295845	5	20281127	20313023	0.274794	0.729703	2.80777	LOC_Os05g34270		inactive receptor kinase At1g27190 precursor, putative, expressed
CS-KGW-ind-Nip-F1	D	Chr9_5092554	9	4600898	5607443	0.271027	0.225734	0.864686	LOC_Os09g08960		retrotransposon protein, putative, unclassified, expressed
CS-KGW-ind-Nip-F1	OD	Chr1_22526716	1	22411877	22884023	0.258656	-0.394802	-1.53407	LOC_Os01g40220		DEFL7 - Defensin and Defensin-like DEFL family
CS-KGW-ind-Nip-F1	OD	Chr11_23974933	11	22660398	23981966	0.0304683	0.443976	28.0882	LOC_Os11g38250		expressed protein
CS-KGW-ind-Nip-F1	OD	Chr11_18858858	11	18822708	18991120	0.0810101	-0.311568	-4.42967	LOC_Os11g32160		expressed protein
CS-KGW-ind-Nip-F1	OD	Chr1_22526716	1	22411877	22884023	0.258656	-0.394802	-1.53407	LOC_Os01g39770		calcineurin B, putative, expressed
CS-KGW-ind-Nip-F1	OD	Chr6_27048017	6	26615732	28810505	0.223945	-0.920587	-4.11099	LOC_Os06g44880		type II intron maturase protein, putative, expressed
CS-KGW-ind-Nip-F1	OD	Chr12_3593419	12	3191980	3973292	0.189654	-0.613436	-3.32556	LOC_Os12g07430		expressed protein
CS-KGW-ind-Nip-F1	OD	Chr9_3482779	9	1887917	4402395	0.136904	0.342731	697.99	LOC_Os09g04460		retrotransposon protein, putative, unclassified, expressed
CS-KGW-ind-Nip-F1	OD	Chr12_3593419	12	3191980	3973292	0.189654	-0.613436	-3.32556	LOC_Os12g06580		retrotransposon protein, putative, Ty1-copia subclass
CS-KGW-ind-Nip-F1	OD	Chr6_7560812	6	7526350	7638154	0.0993589	-0.232949	-2.42269	LOC_Os06g13610		expressed protein
CS-KGW-ind-Nip-F1	OD	Chr7_9221254	7	9191117	10563636	0.0930023	-0.33458	-7.44622	LOC_Os07g15910		expressed protein
CS-KGW-ind-Nip-F1	OD	Chr1_34189260	1	33273845	35114009	0.100901	0.498414	29.5404	LOC_Os01g58720		retrotransposon protein, putative, Ty3-gypsy subclass, expressed
CS-KGW-ind-Nip-F1	OD	Chr1_34189260	1	33273845	35114009	0.100901	0.498414	29.5404	LOC_Os01g57680		expressed protein
CS-KGW-ind-Nip-F1	OD	Chr9_1723021	9	242893	1846966	0.115462	0.381992	3.85552	LOC_Os09g02150		expressed protein
CS-KGW-ind-Nip-F1	OD	Chr5_24842926	5	24639545	26188778	0.039955	-0.379266	-18.6803	LOC_Os05g42340		ubiquitin E3 ligase ICP0, putative, expressed
CS-KGW-ind-Nip-F1	OD	Chr10_14852766	10	13990531	15988580	0.151322	0.347038	2.40609	LOC_Os10g30630		hypothetical protein
CS-KGW-ind-Nip-F1	D	Chr9_5092554	9	4600898	5607443	0.271027	0.225734	0.864686	LOC_Os09g09260		expressed protein
CS-KGW-ind-Nip-HV	A	Chr4_13394262	4	11807034	13470427	0.191915	0.0141017	0.0210184	LOC_Os04g23480		retrotransposon protein, putative, unclassified
CS-KGW-ind-Nip-HV	OD	Chr9_1559371	9	684771	1559371	0.172555	0.447677	8.60089	LOC_Os09g02690		expressed protein
CS-KGW-ind-Nip-HV	A	Chr4_13394262	4	11807034	13470427	0.191915	0.0141017	0.0210184	LOC_Os04g22460		retrotransposon protein, putative, unclassified, expressed
CS-KGW-ind-Nip-HV	D	Chr5_18808818	5	18482238	20281131	0.111781	0.161984	1.41573	LOC_Os05g31850		retrotransposon protein, putative, unclassified, expressed
CS-KGW-ind-Nip-HV	OD	Chr7_1776133	7	1702276	2281742	0.0286218	-0.451322	-89.9622	LOC_Os07g04280		expressed protein
CS-KGW-ind-Nip-HV	OD	Chr7_1628303	7	1614605	1702098	0.0483836	-0.33415	-46.6816	LOC_Os07g03870		receptor like protein kinase, putative, expressed
CS-KGW-ind-Nip-HV	D	Chr2_25776762	2	25776762	25850923	0.296778	0.272137	0.916668	LOC_Os02g42870		MYB family transcription factor, putative, expressed
CS-KGW-ind-Nip-HV	OD	Chr7_928927	7	363050	1162571	0.0436155	-0.392249	-11.7998	LOC_Os07g02990		expressed protein
CS-KGW-ind-Nip-HV	OD	Chr7_928927	7	363050	1162571	0.0436155	-0.392249	-11.7998	LOC_Os07g02740		hypothetical protein
CS-KGW-ind-Nip-HV	D	Chr1_16430042	1	14674404	17045184	0.212891	-0.311485	-1.96465	LOC_Os01g28810		expressed protein
CS-KGW-ind-Nip-HV	OD	Chr12_2640458	12	2625589	2655473	0.121764	0.641149	5.49227	LOC_Os12g05720		expressed protein
CS-KGW-ind-Nip-HV	OD	Chr6_6201927	6	5805138	6209320	0.0361563	0.215242	19.5782	LOC_Os06g11690		retrotransposon protein, putative, unclassified, expressed
CS-KGW-ind-Nip-HV	OD	Chr7_1776133	7	1702276	2281742	0.0286218	-0.451322	-89.9622	LOC_Os07g04150		stress-induced protein, putative, expressed
CS-KGW-ind-Nip-HV	OD	Chr6_17488943	6	17432082	17488963	0.0711335	0.13929	4.34124	LOC_Os06g30270		retrotransposon protein, putative, unclassified, expressed
CS-KGW-ind-Nip-HV	D	Chr1_16430042	1	14674404	17045184	0.212891	-0.311485	-1.96465	LOC_Os01g26350		retrotransposon protein, putative, unclassified, expressed
CS-KGW-ind-Nip-HV	A	Chr4_13394262	4	11807034	13470427	0.191915	0.0141017	0.0210184	LOC_Os04g20990		tRNA-dihydrouridine synthase, putative, expressed
CS-KGW-ind-Nip-HV	OD	Chr10_1564966	10	1177791	1622388	0.0121466	0.251068	59.1391	LOC_Os10g03500		expressed protein
CS-KGW-ind-Nip-HV	OD	Chr6_17488943	6	17432082	17488963	0.0711335	0.13929	4.34124	LOC_Os06g30240		hypothetical protein
CS-KGW-ind-Nip-HV	OD	Chr10_1564966	10	1177791	1622388	0.0121466	0.251068	59.1391	LOC_Os10g03570		RGH1A, putative, expressed
CS-KGW-ind-Nip-HV	OD	Chr11_18484282	11	18451035	18517602	0.0284372	-0.358021	-41.4144	LOC_Os11g31570		expressed protein
CS-KGW-ind-Nip-HV	D	Chr5_18808818	5	18482238	20281131	0.111781	0.161984	1.41573	LOC_Os05g32020		expressed protein
CS-KGW-ind-Nip-HV	OD	Chr12_3191395	12	3190983	3528899	0.10104	-0.662626	-6.7209	LOC_Os12g06610		nucleolar complex protein 2, putative, expressed
CS-KGW-ind-Nip-HV	D	Chr1_16430042	1	14674404	17045184	0.212891	-0.311485	-1.96465	LOC_Os01g27760		expressed protein
CS-KGW-ind-Nip-HV	A	Chr2_7736381	2	7676594	7987633	0.115112	-0.047055	-0.416204	LOC_Os02g14300		expressed protein
CS-KGW-ind-Nip-HV	OD	Chr2_26147803	2	26101464	26205799	0.0856504	-0.217168	-2.5275	LOC_Os02g43390		retrotransposon protein, putative, Ty3-gypsy subclass, expressed
CS-KGW-ind-Nip-HV	D	Chr5_18808818	5	18482238	20281131	0.111781	0.161984	1.41573	LOC_Os05g31760		annexin, putative, expressed
CS-KGW-ind-Nip-HV	OD	Chr7_928927	7	363050	1162571	0.0436155	-0.392249	-11.7998	LOC_Os07g02330		protein phosphatase 2C, putative, expressed
CS-KGW-ind-Nip-HV	OD	Chr12_3191395	12	3190983	3528899	0.10104	-0.662626	-6.7209	LOC_Os12g06660		actin, putative, expressed
CS-KGW-ind-Nip-HV	OD	Chr11_18484282	11	18451035	18517602	0.0284372	-0.358021	-41.4144	LOC_Os11g31660		expressed protein
CS-KGW-ind-Nip-HV	OD	Chr2_35015945	2	34999320	35024273	0.0694372	-0.18116	-2.66729	LOC_Os02g57180		NADH dehydrogenase 1 alpha subcomplex subunit 9,mitochondrial precursor, putative, expressed
CS-KGW-ind-Nip-HV	OD	Chr12_19301561	12	18006331	19329034	0.0244414	0.169525	8.90781	LOC_Os12g32010		expressed protein
CS-KGW-ind-Nip-HV	D	Chr10_2565973	10	2476325	3023697	0.0485858	-0.0256383	-2.62091	LOC_Os10g05170		OsWAK100 - OsWAK receptor-like cytoplasmic kinase OsWAK-RLCK, expressed
CS-KGW-ind-Nip-HV	OD	Chr11_18239505	11	18239505	18438494	0.0411279	-0.586058	-160.082	LOC_Os11g31320		retrotransposon protein, putative, unclassified
CS-KGW-ind-Nip-HV	D	Chr5_18808818	5	18482238	20281131	0.111781	0.161984	1.41573	LOC_Os05g31860		retrotransposon protein, putative, unclassified, expressed
CS-KGW-ind-Nip-HV	D	Chr1_16430042	1	14674404	17045184	0.212891	-0.311485	-1.96465	LOC_Os01g27120		expressed protein
CS-KGW-ind-Nip-HV	D	Chr5_18808818	5	18482238	20281131	0.111781	0.161984	1.41573	LOC_Os05g32130		expressed protein
CS-KGW-ind-Nip-HV	OD	Chr7_1776133	7	1702276	2281742	0.0286218	-0.451322	-89.9622	LOC_Os07g04040		expressed protein
CS-KGW-ind-Nip-HV	OD	Chr12_19301561	12	18006331	19329034	0.0244414	0.169525	8.90781	LOC_Os12g32030		expressed protein
CS-KGW-ind-Nip-HV	D	Chr1_16430042	1	14674404	17045184	0.212891	-0.311485	-1.96465	LOC_Os01g29730		retrotransposon protein, putative, Ty3-gypsy subclass
CS-KGW-ind-Nip-HV	A	Chr1_19066449	1	17070959	19066449	0.205049	-0.0551475	-0.405517	LOC_Os01g34020		retrotransposon protein, putative, unclassified, expressed
CS-KGW-ind-Nip-HV	OD	Chr12_3191395	12	3190983	3528899	0.10104	-0.662626	-6.7209	LOC_Os12g07010		ribosomal protein L3, putative, expressed
CS-KGW-ind-Nip-HV	OD	Chr11_18123152	11	16479377	18239479	0.0703695	-0.239575	-5.83132	LOC_Os11g30920		transposon protein, putative, Mariner sub-class
CS-KGW-ind-Nip-HV	OD	Chr11_18123152	11	16479377	18239479	0.0703695	-0.239575	-5.83132	LOC_Os11g30770		expressed protein
CS-KGW-ind-Nip-HV	OD	Chr11_18123152	11	16479377	18239479	0.0703695	-0.239575	-5.83132	LOC_Os11g31180		transposon protein, putative, CACTA, En/Spm sub-class
CS-KGW-ind-Nip-HV	OD	Chr6_6201927	6	5805138	6209320	0.0361563	0.215242	19.5782	LOC_Os06g11560		retrotransposon protein, putative, Ty3-gypsy subclass, expressed
CS-KGW-ind-Nip-HV	OD	Chr6_5715669	6	5680621	5717135	0.0474349	-0.128592	-4.45819	LOC_Os06g10920		xyloglucan fucosyltransferase, putative, expressed
CS-KGW-ind-Nip-HV	OD	Chr11_18123152	11	16479377	18239479	0.0703695	-0.239575	-5.83132	LOC_Os11g30530		retrotransposon protein, putative, unclassified, expressed
CS-KGW-ind-Nip-HV	OD	Chr7_928927	7	363050	1162571	0.0436155	-0.392249	-11.7998	LOC_Os07g02570		NB-ARC domain containing protein, expressed
CS-KGW-ind-Nip-HV	OD	Chr7_928927	7	363050	1162571	0.0436155	-0.392249	-11.7998	LOC_Os07g03030		expressed protein
CS-KGW-ind-Nip-HV	D	Chr1_16430042	1	14674404	17045184	0.212891	-0.311485	-1.96465	LOC_Os01g27490		leucoanthocyanidin dioxygenase, putative, expressed
CS-KGW-ind-Nip-HV	OD	Chr11_18239505	11	18239505	18438494	0.0411279	-0.586058	-160.082	LOC_Os11g31330		no apical meristem protein, putative, expressed
CS-KGW-ind-Nip-HV	OD	Chr10_1564966	10	1177791	1622388	0.0121466	0.251068	59.1391	LOC_Os10g03520		expressed protein
CS-KGW-ind-Nip-HV	D	Chr1_12374056	1	12318270	12548075	0.151369	0.156128	1.29568	LOC_Os01g22249		peroxidase precursor, putative, expressed
CS-KGW-ind-Nip-HV	OD	Chr6_6230045	6	6212656	6368315	0.0260483	0.247855	11.4375	LOC_Os06g11880		transposon protein, putative, CACTA, En/Spm sub-class, expressed
CS-KGW-ind-Nip-HV	OD	Chr8_5165086	8	5165086	5245120	0.0861388	-0.263254	-3.48866	LOC_Os08g08960		Cupin domain containing protein, expressed
CS-KGW-ind-Nip-HV	OD	Chr9_18162473	9	17194837	18184604	0.154203	-0.479063	-3.11799	LOC_Os09g29670		white-brown complex homolog protein 11, putative, expressed
CS-KGW-ind-Nip-HV	OD	Chr11_18123152	11	16479377	18239479	0.0703695	-0.239575	-5.83132	LOC_Os11g30640		expressed protein
CS-KGW-ind-Nip-HV	OD	Chr12_3191395	12	3190983	3528899	0.10104	-0.662626	-6.7209	LOC_Os12g07170		transposon protein, putative, Pong sub-class, expressed
CS-KGW-ind-Nip-HV	OD	Chr11_18123152	11	16479377	18239479	0.0703695	-0.239575	-5.83132	LOC_Os11g31190		nodulin MtN3 family protein, putative, expressed
CS-KGW-ind-Nip-HV	D	Chr1_16430042	1	14674404	17045184	0.212891	-0.311485	-1.96465	LOC_Os01g27200		retrotransposon protein, putative, unclassified, expressed
CS-KGW-ind-Nip-HV	D	Chr5_471045	5	379097	510707	0.106768	0.144825	1.95524	LOC_Os05g01690		expressed protein
CS-KGW-ind-Nip-HV	OD	Chr7_928927	7	363050	1162571	0.0436155	-0.392249	-11.7998	LOC_Os07g03020		expressed protein
CS-KGW-ind-Nip-HV	OD	Chr10_1564966	10	1177791	1622388	0.0121466	0.251068	59.1391	LOC_Os10g03360		transferase family protein, putative, expressed
CS-KGW-ind-Nip-HV	OD	Chr10_1564966	10	1177791	1622388	0.0121466	0.251068	59.1391	LOC_Os10g03660		OsFBX345 - F-box domain containing protein, expressed
CS-KGW-ind-Nip-HV	OD	Chr12_3191395	12	3190983	3528899	0.10104	-0.662626	-6.7209	LOC_Os12g06990		expressed protein
CS-KGW-ind-Nip-HV	OD	Chr11_18123152	11	16479377	18239479	0.0703695	-0.239575	-5.83132	LOC_Os11g30840		retrotransposon protein, putative, unclassified, expressed
CS-KGW-ind-Nip-HV	OD	Chr9_18162473	9	17194837	18184604	0.154203	-0.479063	-3.11799	LOC_Os09g28320		expressed protein
CS-KGW-ind-Nip-HV	OD	Chr10_3505456	10	3031517	3514441	0.0842004	0.223232	3.73135	LOC_Os10g06280		retrotransposon protein, putative, unclassified, expressed
CS-KGW-ind-Nip-HV	D	Chr1_11469735	1	11469735	12264898	0.255041	0.194559	0.766779	LOC_Os01g21850		protein transport protein-related, putative, expressed
CS-KGW-ind-Nip-HV	OD	Chr9_18162473	9	17194837	18184604	0.154203	-0.479063	-3.11799	LOC_Os09g29910		expressed protein
CS-KGW-ind-Nip-HV	OD	Chr7_928927	7	363050	1162571	0.0436155	-0.392249	-11.7998	LOC_Os07g02624		expressed protein
CS-KGW-ind-Nip-HV	D	Chr1_11469735	1	11469735	12264898	0.255041	0.194559	0.766779	LOC_Os01g21090		retrotransposon protein, putative, unclassified, expressed
CS-KGW-ind-Nip-HV	OD	Chr9_18774717	9	18195911	19701286	0.0232249	-0.644212	-56.3893	LOC_Os09g31280		OTU-like cysteine protease family protein, putative, expressed
CS-KGW-ind-Nip-HV	OD	Chr7_1776133	7	1702276	2281742	0.0286218	-0.451322	-89.9622	LOC_Os07g04910		reticulon domain containing protein, putative, expressed
CS-KGW-ind-Nip-HV	D	Chr7_23371153	7	23256319	23537307	0.300044	-0.346099	-1.22062	LOC_Os07g38760		HEAT repeat family protein, putative, expressed
CS-KGW-ind-Nip-HV	A	Chr4_13394262	4	11807034	13470427	0.191915	0.0141017	0.0210184	LOC_Os04g23400		retrotransposon protein, putative, unclassified, expressed
CS-KGW-ind-Nip-HV	OD	Chr10_3505456	10	3031517	3514441	0.0842004	0.223232	3.73135	LOC_Os10g06740		receptor-like protein kinase precursor, putative, expressed
CS-KGW-ind-Nip-HV	OD	Chr11_18123152	11	16479377	18239479	0.0703695	-0.239575	-5.83132	LOC_Os11g31030		expressed protein
CS-KGW-ind-Nip-HV	OD	Chr7_1776133	7	1702276	2281742	0.0286218	-0.451322	-89.9622	LOC_Os07g04590		expressed protein
CS-KGW-ind-Nip-HV	OD	Chr11_18239505	11	18239505	18438494	0.0411279	-0.586058	-160.082	LOC_Os11g31440		expressed protein
CS-KGW-ind-Nip-HV	D	Chr5_18808818	5	18482238	20281131	0.111781	0.161984	1.41573	LOC_Os05g31890		aspartyl protease family protein, putative, expressed
CS-KGW-ind-Nip-HV	OD	Chr6_6201927	6	5805138	6209320	0.0361563	0.215242	19.5782	LOC_Os06g11670		expressed protein
CS-KGW-ind-Nip-HV	OD	Chr11_20748687	11	20729346	20754748	0.09512	-0.269525	-2.96335	LOC_Os11g35420		expressed protein
CS-KGW-ind-Nip-HV	OD	Chr7_928927	7	363050	1162571	0.0436155	-0.392249	-11.7998	LOC_Os07g02810		L-ascorbate oxidase homolog precursor, putative, expressed
CS-KGW-ind-Nip-HV	D	Chr1_12374056	1	12318270	12548075	0.151369	0.156128	1.29568	LOC_Os01g22030		expressed protein
CS-KGW-ind-Nip-HV	OD	Chr7_1178573	7	1169577	1196986	0.0763841	-0.325836	-5.20051	LOC_Os07g03080		expressed protein
CS-KGW-ind-Nip-HV	D	Chr1_11469735	1	11469735	12264898	0.255041	0.194559	0.766779	LOC_Os01g21860		AGAP010768-PA, putative, expressed
CS-KGW-ind-Nip-HV	D	Chr7_23371153	7	23256319	23537307	0.300044	-0.346099	-1.22062	LOC_Os07g39190		expressed protein
CS-KGW-ind-Nip-HV	OD	Chr6_26648659	6	26617182	26741966	0.153386	-0.714317	-4.65919	LOC_Os06g44160		heat shock protein DnaJ, putative, expressed
CS-KGW-ind-Nip-HV	OD	Chr12_3191395	12	3190983	3528899	0.10104	-0.662626	-6.7209	LOC_Os12g07100		expressed protein
CS-KGW-ind-Nip-HV	OD	Chr6_6201927	6	5805138	6209320	0.0361563	0.215242	19.5782	LOC_Os06g11620		RNA recognition motif containing protein, putative, expressed
CS-KGW-ind-Nip-HV	OD	Chr11_18732895	11	18717660	18750162	0.0934321	0.377451	4.34387	LOC_Os11g31870		retrotransposon protein, putative, unclassified, expressed
CS-KGW-ind-Nip-HV	OD	Chr12_19301561	12	18006331	19329034	0.0244414	0.169525	8.90781	LOC_Os12g31960		retrotransposon protein, putative, LINE subclass, expressed
CS-KGW-ind-Nip-HV	OD	Chr11_18123152	11	16479377	18239479	0.0703695	-0.239575	-5.83132	LOC_Os11g30990		retrotransposon protein, putative, unclassified, expressed
CS-KGW-ind-Nip-HV	OD	Chr11_18239505	11	18239505	18438494	0.0411279	-0.586058	-160.082	LOC_Os11g31540		BRASSINOSTEROID INSENSITIVE 1-associated receptor kinase 1 precursor, putative, expressed
CS-KGW-ind-Nip-HV	OD	Chr11_18123152	11	16479377	18239479	0.0703695	-0.239575	-5.83132	LOC_Os11g31050		retrotransposon protein, putative, unclassified, expressed
CS-KGW-ind-Nip-HV	OD	Chr10_1564966	10	1177791	1622388	0.0121466	0.251068	59.1391	LOC_Os10g03080		retrotransposon protein, putative, unclassified
CS-KGW-ind-Nip-HV	D	Chr5_18808818	5	18482238	20281131	0.111781	0.161984	1.41573	LOC_Os05g32000		transposon protein, putative, unclassified
CS-KGW-ind-Nip-HV	A	Chr7_5139034	7	4933647	5141436	0.0733099	-0.0186993	-2.97267	LOC_Os07g09675		expressed protein
CS-KGW-ind-Nip-HV	OD	Chr11_20748687	11	20729346	20754748	0.09512	-0.269525	-2.96335	LOC_Os11g35380		expressed protein
CS-KGW-ind-Nip-HV	A	Chr1_19066449	1	17070959	19066449	0.205049	-0.0551475	-0.405517	LOC_Os01g31980		MATE efflux family protein, putative, expressed
CS-KGW-ind-Nip-HV	OD	Chr9_4947251	9	4760457	4990071	0.0112464	0.612032	65.2186	LOC_Os09g08970		expressed protein
CS-KGW-ind-Nip-HV	OD	Chr7_928927	7	363050	1162571	0.0436155	-0.392249	-11.7998	LOC_Os07g02070		retrotransposon protein, putative, Ty3-gypsy subclass
CS-KGW-ind-Nip-HV	A	Chr4_13394262	4	11807034	13470427	0.191915	0.0141017	0.0210184	LOC_Os04g23270		transposon protein, putative, CACTA, En/Spm sub-class, expressed
CS-KGW-ind-Nip-HV	OD	Chr11_18123152	11	16479377	18239479	0.0703695	-0.239575	-5.83132	LOC_Os11g30950		expressed protein
CS-KGW-ind-Nip-HV	A	Chr1_19066449	1	17070959	19066449	0.205049	-0.0551475	-0.405517	LOC_Os01g32250		retrotransposon protein, putative, unclassified, expressed
CS-KGW-ind-Nip-HV	OD	Chr11_18239505	11	18239505	18438494	0.0411279	-0.586058	-160.082	LOC_Os11g31420		expressed protein
CS-KGW-ind-Nip-HV	OD	Chr7_928927	7	363050	1162571	0.0436155	-0.392249	-11.7998	LOC_Os07g03060		expressed protein
CS-KGW-ind-Nip-HV	D	Chr1_11469735	1	11469735	12264898	0.255041	0.194559	0.766779	LOC_Os01g21840		transposon protein, putative, unclassified, expressed
CS-KGW-ind-Nip-HV	OD	Chr11_18123152	11	16479377	18239479	0.0703695	-0.239575	-5.83132	LOC_Os11g31200		retrotransposon protein, putative, unclassified, expressed
CS-KGW-ind-Nip-HV	OD	Chr11_18123152	11	16479377	18239479	0.0703695	-0.239575	-5.83132	LOC_Os11g30730		transposon protein, putative, CACTA, En/Spm sub-class, expressed
CS-KGW-ind-Nip-HV	OD	Chr11_18123152	11	16479377	18239479	0.0703695	-0.239575	-5.83132	LOC_Os11g29230		pentatricopeptide repeat protein PPR986-12, putative, expressed
CS-KGW-ind-Nip-HV	A	Chr4_13394262	4	11807034	13470427	0.191915	0.0141017	0.0210184	LOC_Os04g23550		basic helix-loop-helix family protein, putative, expressed
CS-KGW-ind-Nip-HV	A	Chr2_7736381	2	7676594	7987633	0.115112	-0.047055	-0.416204	LOC_Os02g14320		retrotransposon protein, putative, unclassified, expressed
CS-KGW-ind-Nip-HV	OD	Chr11_18123152	11	16479377	18239479	0.0703695	-0.239575	-5.83132	LOC_Os11g28570		retrotransposon protein, putative, Ty3-gypsy subclass, expressed
CS-KGW-ind-Nip-HV	OD	Chr7_16300586	7	15713265	16300586	0.185726	0.446451	2.47833	LOC_Os07g27200		retrotransposon protein, putative, Ty3-gypsy subclass, expressed
CS-KGW-ind-Nip-HV	OD	Chr6_5715669	6	5680621	5717135	0.0474349	-0.128592	-4.45819	LOC_Os06g10930		xyloglucan fucosyltransferase, putative, expressed
CS-KGW-ind-Nip-HV	D	Chr5_18808818	5	18482238	20281131	0.111781	0.161984	1.41573	LOC_Os05g31970		expressed protein
CS-KGW-ind-Nip-HV	D	Chr2_25776762	2	25776762	25850923	0.296778	0.272137	0.916668	LOC_Os02g42890		cytochrome b561, putative, expressed
CS-KGW-ind-Nip-HV	OD	Chr12_3191395	12	3190983	3528899	0.10104	-0.662626	-6.7209	LOC_Os12g06620		deoxyhypusine hydroxylase, putative, expressed
CS-KGW-ind-Nip-HV	A	Chr4_13394262	4	11807034	13470427	0.191915	0.0141017	0.0210184	LOC_Os04g23250		transposon protein, putative, CACTA, En/Spm sub-class, expressed
CS-KGW-ind-Nip-HV	D	Chr7_13429491	7	13374198	13488189	0.0877461	-0.10179	-1.16108	LOC_Os07g23850		glycosyl hydrolase, putative, expressed
CS-KGW-ind-Nip-HV	OD	Chr2_26147803	2	26101464	26205799	0.0856504	-0.217168	-2.5275	LOC_Os02g43420		hypothetical protein
CS-KGW-ind-Nip-HV	OD	Chr6_26648659	6	26617182	26741966	0.153386	-0.714317	-4.65919	LOC_Os06g44240		gp176, putative, expressed
CS-KGW-ind-Nip-HV	OD	Chr4_13810815	4	13810811	13822589	0.0228375	-0.248784	-13.083	LOC_Os04g24170		RNA recognition motif containing protein, putative, expressed
CS-KGW-ind-Nip-HV	D	Chr5_18808818	5	18482238	20281131	0.111781	0.161984	1.41573	LOC_Os05g32080		retrotransposon protein, putative, unclassified
CS-KGW-ind-Nip-HV	OD	Chr10_1564966	10	1177791	1622388	0.0121466	0.251068	59.1391	LOC_Os10g03600		OsFBX343 - F-box domain containing protein, expressed
CS-KGW-ind-Nip-HV	OD	Chr9_1559371	9	684771	1559371	0.172555	0.447677	8.60089	LOC_Os09g02800		retrotransposon protein, putative, unclassified, expressed
CS-KGW-ind-Nip-HV	OD	Chr6_6201927	6	5805138	6209320	0.0361563	0.215242	19.5782	LOC_Os06g11700		phosphate-induced protein 1 conserved region domain containing protein, expressed
CS-KGW-ind-Nip-HV	OD	Chr7_928927	7	363050	1162571	0.0436155	-0.392249	-11.7998	LOC_Os07g02290		OsFBX208 - F-box domain containing protein, expressed
CS-KGW-ind-Nip-HV	D	Chr1_11469735	1	11469735	12264898	0.255041	0.194559	0.766779	LOC_Os01g21220		retrotransposon protein, putative, unclassified
CS-KGW-ind-Nip-HV	D	Chr5_18808818	5	18482238	20281131	0.111781	0.161984	1.41573	LOC_Os05g32010		hypothetical protein
CS-KGW-ind-Nip-HV	OD	Chr10_2141372	10	2130568	2191771	0.0168408	0.272711	175.702	LOC_Os10g04600		OsFBX359 - F-box domain containing protein, expressed
CS-KGW-ind-Nip-HV	OD	Chr7_928927	7	363050	1162571	0.0436155	-0.392249	-11.7998	LOC_Os07g03025		expressed protein
CS-KGW-ind-Nip-HV	OD	Chr6_17488943	6	17432082	17488963	0.0711335	0.13929	4.34124	LOC_Os06g30250		expressed protein
CS-KGW-ind-Nip-HV	D	Chr2_25776762	2	25776762	25850923	0.296778	0.272137	0.916668	LOC_Os02g42920		DTA2, putative, expressed
CS-KGW-ind-Nip-HV	A	Chr1_19066449	1	17070959	19066449	0.205049	-0.0551475	-0.405517	LOC_Os01g33030		Brix domain containing protein, putative, expressed
CS-KGW-ind-Nip-HV	D	Chr1_11469735	1	11469735	12264898	0.255041	0.194559	0.766779	LOC_Os01g20940		PHS1, putative, expressed
CS-KGW-ind-Nip-HV	OD	Chr11_18123152	11	16479377	18239479	0.0703695	-0.239575	-5.83132	LOC_Os11g30484		ZOS11-03 - C2H2 zinc finger protein, expressed
CS-KGW-ind-Nip-HV	OD	Chr7_1178573	7	1169577	1196986	0.0763841	-0.325836	-5.20051	LOC_Os07g03100		OsFBX212 - F-box domain containing protein, expressed
CS-KGW-ind-Nip-HV	OD	Chr8_5165086	8	5165086	5245120	0.0861388	-0.263254	-3.48866	LOC_Os08g08970		Cupin domain containing protein, expressed
CS-KGW-ind-Nip-HV	OD	Chr7_16300586	7	15713265	16300586	0.185726	0.446451	2.47833	LOC_Os07g27170		retrotransposon protein, putative, Ty3-gypsy subclass, expressed
CS-KGW-ind-Nip-HV	D	Chr1_11469735	1	11469735	12264898	0.255041	0.194559	0.766779	LOC_Os01g21520		esterase/lipase/thioesterase family protein, putative, expressed
CS-KGW-ind-Nip-HV	OD	Chr10_1564966	10	1177791	1622388	0.0121466	0.251068	59.1391	LOC_Os10g03380		hypothetical protein
CS-KGW-ind-Nip-HV	OD	Chr11_18123152	11	16479377	18239479	0.0703695	-0.239575	-5.83132	LOC_Os11g30520		expressed protein
CS-KGW-ind-Nip-HV	OD	Chr7_928927	7	363050	1162571	0.0436155	-0.392249	-11.7998	LOC_Os07g02620		NB-ARC domain containing protein, expressed
CS-KGW-ind-Nip-HV	A	Chr4_13394262	4	11807034	13470427	0.191915	0.0141017	0.0210184	LOC_Os04g23240		transposon protein, putative, CACTA, En/Spm sub-class, expressed
CS-KGW-ind-Nip-HV	OD	Chr11_18123152	11	16479377	18239479	0.0703695	-0.239575	-5.83132	LOC_Os11g30740		transposon protein, putative, CACTA, En/Spm sub-class, expressed
CS-KGW-ind-Nip-HV	OD	Chr11_18123152	11	16479377	18239479	0.0703695	-0.239575	-5.83132	LOC_Os11g31080		retrotransposon protein, putative, unclassified, expressed
CS-KGW-ind-Nip-HV	OD	Chr7_1628303	7	1614605	1702098	0.0483836	-0.33415	-46.6816	LOC_Os07g04010		lectin-like receptor kinase, putative, expressed
CS-KGW-ind-Nip-HV	A	Chr1_19066449	1	17070959	19066449	0.205049	-0.0551475	-0.405517	LOC_Os01g31220		expressed protein
CS-KGW-ind-Nip-HV	OD	Chr12_3191395	12	3190983	3528899	0.10104	-0.662626	-6.7209	LOC_Os12g06650		tetratricopeptide-like helical, putative, expressed
CS-KGW-ind-Nip-HV	OD	Chr11_20748687	11	20729346	20754748	0.09512	-0.269525	-2.96335	LOC_Os11g35360		actin polymerization factor, putative, expressed
CS-KGW-ind-Nip-HV	D	Chr7_23371153	7	23256319	23537307	0.300044	-0.346099	-1.22062	LOC_Os07g38980		expressed protein
CS-KGW-ind-Nip-HV	OD	Chr10_2141372	10	2130568	2191771	0.0168408	0.272711	175.702	LOC_Os10g04510		expressed protein
CS-KGW-ind-Nip-HV	D	Chr1_16430042	1	14674404	17045184	0.212891	-0.311485	-1.96465	LOC_Os01g28280		expressed protein
CS-KGW-ind-Nip-HV	OD	Chr11_18123152	11	16479377	18239479	0.0703695	-0.239575	-5.83132	LOC_Os11g30750		expressed protein
CS-KGW-ind-Nip-HV	OD	Chr7_1776133	7	1702276	2281742	0.0286218	-0.451322	-89.9622	LOC_Os07g04190		receptor protein kinase CLAVATA1 precursor, putative, expressed
CS-KGW-ind-Nip-HV	OD	Chr10_2141372	10	2130568	2191771	0.0168408	0.272711	175.702	LOC_Os10g04490		expressed protein
CS-KGW-ind-Nip-HV	A	Chr4_13394262	4	11807034	13470427	0.191915	0.0141017	0.0210184	LOC_Os04g23420		expressed protein
CS-KGW-ind-Nip-HV	OD	Chr7_928927	7	363050	1162571	0.0436155	-0.392249	-11.7998	LOC_Os07g02700		DUF538 domain containing protein, putative, expressed
CS-KGW-ind-Nip-HV	OD	Chr7_928927	7	363050	1162571	0.0436155	-0.392249	-11.7998	LOC_Os07g02790		expressed protein
CS-KGW-ind-Nip-HV	OD	Chr6_6201927	6	5805138	6209320	0.0361563	0.215242	19.5782	LOC_Os06g11500		MCM9 - Putative minichromosome maintenance MCM family subunit 9, expressed
CS-KGW-ind-Nip-HV	OD	Chr7_1628303	7	1614605	1702098	0.0483836	-0.33415	-46.6816	LOC_Os07g03890		lectin-like receptor kinase 7, putative, expressed
CS-KGW-ind-Nip-HV	OD	Chr9_4947251	9	4760457	4990071	0.0112464	0.612032	65.2186	LOC_Os09g09260		expressed protein
CS-KGW-ind-Nip-HV	D	Chr1_16430042	1	14674404	17045184	0.212891	-0.311485	-1.96465	LOC_Os01g29050		retrotransposon protein, putative, unclassified, expressed
CS-KGW-ind-Nip-HV	OD	Chr2_26147803	2	26101464	26205799	0.0856504	-0.217168	-2.5275	LOC_Os02g43300		expressed protein
CS-KGW-ind-Nip-HV	OD	Chr12_3191395	12	3190983	3528899	0.10104	-0.662626	-6.7209	LOC_Os12g06580		retrotransposon protein, putative, Ty1-copia subclass
CS-KGW-ind-Nip-HV	OD	Chr9_1559371	9	684771	1559371	0.172555	0.447677	8.60089	LOC_Os09g02560		expressed protein
CS-KGW-ind-Nip-HV	OD	Chr7_1776133	7	1702276	2281742	0.0286218	-0.451322	-89.9622	LOC_Os07g04300		expressed protein
CS-KGW-ind-Nip-HV	OD	Chr9_18774717	9	18195911	19701286	0.0232249	-0.644212	-56.3893	LOC_Os09g30510		glucosyl transferase, putative, expressed
CS-KGW-ind-Nip-HV	OD	Chr6_6201927	6	5805138	6209320	0.0361563	0.215242	19.5782	LOC_Os06g11660		phosphate-induced protein 1 conserved region domain containing protein, expressed
CS-KGW-ind-Nip-HV	OD	Chr11_18239505	11	18239505	18438494	0.0411279	-0.586058	-160.082	LOC_Os11g31390		expressed protein
CS-KGW-ind-Nip-HV	OD	Chr9_4947251	9	4760457	4990071	0.0112464	0.612032	65.2186	LOC_Os09g08960		retrotransposon protein, putative, unclassified, expressed
CS-KGW-ind-Nip-HV	D	Chr7_13429491	7	13374198	13488189	0.0877461	-0.10179	-1.16108	LOC_Os07g23680		retrotransposon protein, putative, Ty3-gypsy subclass
CS-KGW-ind-Nip-HV	OD	Chr6_17488943	6	17432082	17488963	0.0711335	0.13929	4.34124	LOC_Os06g30200		transposon protein, putative, CACTA, En/Spm sub-class
CS-KGW-ind-Nip-HV	OD	Chr6_6230045	6	6212656	6368315	0.0260483	0.247855	11.4375	LOC_Os06g11730		RNA recognition motif containing protein, putative, expressed
CS-KGW-ind-Nip-HV	OD	Chr10_1564966	10	1177791	1622388	0.0121466	0.251068	59.1391	LOC_Os10g03620		OsFBX344 - F-box domain containing protein, expressed
CS-KGW-ind-Nip-HV	D	Chr1_11469735	1	11469735	12264898	0.255041	0.194559	0.766779	LOC_Os01g20800		expressed protein
CS-KGW-ind-Nip-HV	OD	Chr10_3505456	10	3031517	3514441	0.0842004	0.223232	3.73135	LOC_Os10g06030		OsWAK103 - OsWAK receptor-like protein kinase, expressed
CS-KGW-ind-Nip-HV	OD	Chr11_18484282	11	18451035	18517602	0.0284372	-0.358021	-41.4144	LOC_Os11g31650		expressed protein
CS-KGW-ind-Nip-HV	OD	Chr7_928927	7	363050	1162571	0.0436155	-0.392249	-11.7998	LOC_Os07g02674		expressed protein
CS-KGW-ind-Nip-HV	OD	Chr9_4947251	9	4760457	4990071	0.0112464	0.612032	65.2186	LOC_Os09g09000		transposon protein, putative, CACTA, En/Spm sub-class, expressed
CS-KGW-ind-Nip-HV	OD	Chr7_928927	7	363050	1162571	0.0436155	-0.392249	-11.7998	LOC_Os07g02920		DUF538 domain containing protein, putative, expressed
CS-KGW-ind-Nip-HV	D	Chr5_18808818	5	18482238	20281131	0.111781	0.161984	1.41573	LOC_Os05g32210		NAD kinase, putative, expressed
CS-KGW-ind-Nip-HV	OD	Chr11_18239505	11	18239505	18438494	0.0411279	-0.586058	-160.082	LOC_Os11g31480		ATP binding protein, putative, expressed
CS-KGW-ind-Nip-HV	OD	Chr11_18123152	11	16479377	18239479	0.0703695	-0.239575	-5.83132	LOC_Os11g31110		expressed protein
CS-KGW-ind-Nip-HV	OD	Chr7_928927	7	363050	1162571	0.0436155	-0.392249	-11.7998	LOC_Os07g02970		expressed protein
CS-KGW-ind-Nip-HV	OD	Chr8_5165086	8	5165086	5245120	0.0861388	-0.263254	-3.48866	LOC_Os08g08930		expressed protein
CS-KGW-ind-Nip-HV	OD	Chr12_3191395	12	3190983	3528899	0.10104	-0.662626	-6.7209	LOC_Os12g06600		retrotransposon protein, putative, Ty1-copia subclass, expressed
CS-KGW-ind-Nip-HV	OD	Chr11_18123152	11	16479377	18239479	0.0703695	-0.239575	-5.83132	LOC_Os11g30970		retrotransposon protein, putative, unclassified, expressed
CS-KGW-ind-Nip-HV	OD	Chr7_928927	7	363050	1162571	0.0436155	-0.392249	-11.7998	LOC_Os07g02192		expressed protein
CS-KGW-ind-Nip-HV	OD	Chr11_18239505	11	18239505	18438494	0.0411279	-0.586058	-160.082	LOC_Os11g31500		ATP binding protein, putative, expressed
CS-KGW-ind-Nip-HV	A	Chr2_7736381	2	7676594	7987633	0.115112	-0.047055	-0.416204	LOC_Os02g14260		retrotransposon protein, putative, unclassified, expressed
CS-KGW-ind-Nip-HV	A	Chr2_7736381	2	7676594	7987633	0.115112	-0.047055	-0.416204	LOC_Os02g14310		expressed protein
CS-KGW-ind-Nip-HV	A	Chr2_7736381	2	7676594	7987633	0.115112	-0.047055	-0.416204	LOC_Os02g14290		scramblase, putative, expressed
CS-KGW-ind-Nip-HV	OD	Chr7_928927	7	363050	1162571	0.0436155	-0.392249	-11.7998	LOC_Os07g02730		expressed protein
CS-KGW-ind-Nip-HV	D	Chr2_10270193	2	10167101	10348275	0.10339	0.154405	1.58883	LOC_Os02g17760		cytochrome P450, putative, expressed
CS-KGW-ind-Nip-HV	D	Chr1_11469735	1	11469735	12264898	0.255041	0.194559	0.766779	LOC_Os01g21210		retrotransposon protein, putative, unclassified, expressed
CS-KGW-ind-Nip-HV	OD	Chr7_928927	7	363050	1162571	0.0436155	-0.392249	-11.7998	LOC_Os07g02900		DUF538 domain containing protein, putative, expressed
CS-KGW-ind-Nip-HV	OD	Chr2_34874839	2	34855770	34888177	0.10761	-0.18391	-1.78331	LOC_Os02g56910		lecithine cholesterol acyltransferase, putative, expressed
CS-KGW-ind-Nip-HV	D	Chr1_11469735	1	11469735	12264898	0.255041	0.194559	0.766779	LOC_Os01g20960		hypothetical protein
CS-KGW-ind-Nip-HV	D	Chr10_2565973	10	2476325	3023697	0.0485858	-0.0256383	-2.62091	LOC_Os10g05190		transposon protein, putative, CACTA, En/Spm sub-class, expressed
CS-KGW-ind-Nip-HV	OD	Chr7_1628303	7	1614605	1702098	0.0483836	-0.33415	-46.6816	LOC_Os07g03960		transporter family protein, putative, expressed
CS-KGW-ind-Nip-HV	OD	Chr7_928927	7	363050	1162571	0.0436155	-0.392249	-11.7998	LOC_Os07g02390		hypothetical protein
CS-KGW-ind-Nip-HV	OD	Chr6_5715669	6	5680621	5717135	0.0474349	-0.128592	-4.45819	LOC_Os06g10910		xyloglucan fucosyltransferase, putative, expressed
CS-KGW-ind-Nip-HV	A	Chr4_13394262	4	11807034	13470427	0.191915	0.0141017	0.0210184	LOC_Os04g23360		retrotransposon protein, putative, unclassified, expressed
CS-KGW-ind-Nip-HV	OD	Chr7_928927	7	363050	1162571	0.0436155	-0.392249	-11.7998	LOC_Os07g02880		DUF538 domain containing protein, putative, expressed
CS-KGW-ind-Nip-HV	OD	Chr11_18123152	11	16479377	18239479	0.0703695	-0.239575	-5.83132	LOC_Os11g31120		hypothetical protein
CS-KGW-ind-Nip-HV	D	Chr10_2565973	10	2476325	3023697	0.0485858	-0.0256383	-2.62091	LOC_Os10g05230		zinc finger, C3HC4 type domain containing protein, expressed
CS-KGW-ind-Nip-HV	D	Chr1_16430042	1	14674404	17045184	0.212891	-0.311485	-1.96465	LOC_Os01g26310		wall-associated kinase-like 2, putative, expressed
CS-KGW-ind-Nip-HV	OD	Chr7_1776133	7	1702276	2281742	0.0286218	-0.451322	-89.9622	LOC_Os07g04310		expressed protein
CS-KGW-ind-Nip-HV	OD	Chr11_18123152	11	16479377	18239479	0.0703695	-0.239575	-5.83132	LOC_Os11g30860		retrotransposon protein, putative, Ty3-gypsy subclass, expressed
CS-KGW-ind-Nip-HV	OD	Chr7_1628303	7	1614605	1702098	0.0483836	-0.33415	-46.6816	LOC_Os07g03970		lectin-like receptor kinase 7, putative, expressed
CS-KGW-ind-Nip-HV	OD	Chr2_26147803	2	26101464	26205799	0.0856504	-0.217168	-2.5275	LOC_Os02g43410		transposon protein, putative, unclassified, expressed
CS-KGW-ind-Nip-HV	OD	Chr9_18774717	9	18195911	19701286	0.0232249	-0.644212	-56.3893	LOC_Os09g31490		reductase, putative, expressed
CS-KGW-ind-Nip-HV	OD	Chr12_4605740	12	4565626	5524927	0.0620577	-0.449818	-8.38622	LOC_Os12g10430		retrotransposon protein, putative, Ty3-gypsy subclass, expressed
CS-KGW-ind-Nip-HV	A	Chr2_7736381	2	7676594	7987633	0.115112	-0.047055	-0.416204	LOC_Os02g14230		expressed protein
CS-KGW-ind-Nip-HV	OD	Chr7_928927	7	363050	1162571	0.0436155	-0.392249	-11.7998	LOC_Os07g02980		expressed protein
CS-KGW-ind-Nip-HV	OD	Chr12_4605740	12	4565626	5524927	0.0620577	-0.449818	-8.38622	LOC_Os12g08950		retrotransposon, putative, centromere-specific, expressed
CS-KGW-ind-Nip-HV	OD	Chr11_18123152	11	16479377	18239479	0.0703695	-0.239575	-5.83132	LOC_Os11g31260		conserved hypothetical protein
CS-KGW-ind-Nip-HV	D	Chr1_16430042	1	14674404	17045184	0.212891	-0.311485	-1.96465	LOC_Os01g29350		hypothetical protein
CS-KGW-ind-Nip-HV	OD	Chr9_1559371	9	684771	1559371	0.172555	0.447677	8.60089	LOC_Os09g02060		expressed protein
CS-KGW-ind-Nip-HV	OD	Chr6_6201927	6	5805138	6209320	0.0361563	0.215242	19.5782	LOC_Os06g11680		phosphate-induced protein 1 conserved region domain containing protein, expressed
CS-KGW-ind-Nip-HV	OD	Chr12_3191395	12	3190983	3528899	0.10104	-0.662626	-6.7209	LOC_Os12g06670		protein kinase family protein, putative, expressed
CS-KGW-ind-Nip-HV	OD	Chr12_19301561	12	18006331	19329034	0.0244414	0.169525	8.90781	LOC_Os12g32020		expressed protein
CS-KGW-ind-Nip-HV	OD	Chr6_17488943	6	17432082	17488963	0.0711335	0.13929	4.34124	LOC_Os06g30260		retrotransposon protein, putative, Ty3-gypsy subclass, expressed
CS-KGW-ind-Nip-HV	OD	Chr10_3505456	10	3031517	3514441	0.0842004	0.223232	3.73135	LOC_Os10g06760		receptor-like protein kinase precursor, putative, expressed
CS-KGW-ind-Nip-HV	A	Chr1_19066449	1	17070959	19066449	0.205049	-0.0551475	-0.405517	LOC_Os01g33360		DnaK family protein, putative, expressed
CS-KGW-ind-Nip-HV	OD	Chr7_928927	7	363050	1162571	0.0436155	-0.392249	-11.7998	LOC_Os07g02870		DUF538 domain containing protein, putative, expressed
CS-KGW-ind-Nip-HV	OD	Chr10_1564966	10	1177791	1622388	0.0121466	0.251068	59.1391	LOC_Os10g02890		expressed protein
CS-KGW-ind-Nip-HV	D	Chr2_10270193	2	10167101	10348275	0.10339	0.154405	1.58883	LOC_Os02g17770		expressed protein
CS-KGW-ind-Nip-HV	A	Chr2_7736381	2	7676594	7987633	0.115112	-0.047055	-0.416204	LOC_Os02g14460		peroxidase precursor, putative, expressed
CS-KGW-ind-Nip-HV	OD	Chr11_18123152	11	16479377	18239479	0.0703695	-0.239575	-5.83132	LOC_Os11g31060		IQ calmodulin-binding and BAG domain containing protein, putative, expressed
CS-KGW-ind-Nip-HV	OD	Chr8_1704251	8	1695966	1715524	0.0725149	-0.498557	-8.42036	LOC_Os08g03620		tetratricopeptide repeat domain containing protein, expressed
CS-KGW-ind-Nip-HV	D	Chr5_18808818	5	18482238	20281131	0.111781	0.161984	1.41573	LOC_Os05g32474		expressed protein
CS-KGW-ind-Nip-HV	A	Chr2_7736381	2	7676594	7987633	0.115112	-0.047055	-0.416204	LOC_Os02g14440		peroxidase precursor, putative, expressed
CS-KGW-ind-Nip-HV	D	Chr10_2565973	10	2476325	3023697	0.0485858	-0.0256383	-2.62091	LOC_Os10g05180		26S proteasome regulatory subunit S5A, putative, expressed
CS-KGW-ind-Nip-HV	A	Chr1_19066449	1	17070959	19066449	0.205049	-0.0551475	-0.405517	LOC_Os01g34040		retrotransposon protein, putative, unclassified, expressed
CS-KGW-ind-Nip-HV	OD	Chr9_1559371	9	684771	1559371	0.172555	0.447677	8.60089	LOC_Os09g02284		DNA-directed RNA polymerase subunit, putative, expressed
CS-KGW-ind-Nip-HV	A	Chr4_13394262	4	11807034	13470427	0.191915	0.0141017	0.0210184	LOC_Os04g23300		retrotransposon protein, putative, Ty3-gypsy subclass, expressed
CS-KGW-ind-Nip-HV	D	Chr5_18808818	5	18482238	20281131	0.111781	0.161984	1.41573	LOC_Os05g32430		NLI interacting factor-like phosphatase, putative, expressed
CS-KGW-ind-Nip-HV	OD	Chr9_1559371	9	684771	1559371	0.172555	0.447677	8.60089	LOC_Os09g03040		transposon protein, putative, CACTA, En/Spm sub-class, expressed
CS-KGW-ind-Nip-HV	OD	Chr12_19301561	12	18006331	19329034	0.0244414	0.169525	8.90781	LOC_Os12g32000		transposon protein, putative, CACTA, En/Spm sub-class, expressed
CS-KGW-ind-Nip-HV	D	Chr5_18808818	5	18482238	20281131	0.111781	0.161984	1.41573	LOC_Os05g31750		annexin, putative, expressed
CS-KGW-ind-Nip-HV	OD	Chr7_1776133	7	1702276	2281742	0.0286218	-0.451322	-89.9622	LOC_Os07g04170		OsMADS90 - MADS-box family gene with M-beta type-box, expressed
CS-KGW-ind-Nip-HV	OD	Chr10_3505456	10	3031517	3514441	0.0842004	0.223232	3.73135	LOC_Os10g06490		retrotransposon protein, putative, unclassified, expressed
CS-KGW-ind-Nip-HV	OD	Chr10_3505456	10	3031517	3514441	0.0842004	0.223232	3.73135	LOC_Os10g06000	OsPRP1	POEI15 - Pollen Ole e I allergen and extensin family protein precursor, expressed
CS-KGW-ind-Nip-HV	OD	Chr6_26648659	6	26617182	26741966	0.153386	-0.714317	-4.65919	LOC_Os06g44210		protein phosphatase 2C, putative, expressed
CS-KGW-ind-Nip-HV	OD	Chr10_1564966	10	1177791	1622388	0.0121466	0.251068	59.1391	LOC_Os10g03610		heat shock protein DnaJ, putative, expressed
CS-KGW-ind-Nip-HV	OD	Chr11_18123152	11	16479377	18239479	0.0703695	-0.239575	-5.83132	LOC_Os11g31160		transposon protein, putative, CACTA, En/Spm sub-class, expressed
CS-KGW-ind-Nip-HV	D	Chr1_16430042	1	14674404	17045184	0.212891	-0.311485	-1.96465	LOC_Os01g27630		glutathione S-transferase, putative, expressed
CS-KGW-ind-Nip-HV	A	Chr1_19066449	1	17070959	19066449	0.205049	-0.0551475	-0.405517	LOC_Os01g32480		retrotransposon, putative, centromere-specific
CS-KGW-ind-Nip-HV	D	Chr7_13429491	7	13374198	13488189	0.0877461	-0.10179	-1.16108	LOC_Os07g23690		root cap protein 1, putative, expressed
CS-KGW-ind-Nip-HV	OD	Chr6_4792104	6	4783747	5049747	0.047131	-0.297831	-9.16784	LOC_Os06g09430		hypothetical protein
CS-KGW-ind-Nip-HV	A	Chr1_19066449	1	17070959	19066449	0.205049	-0.0551475	-0.405517	LOC_Os01g33615		expressed protein
CS-KGW-ind-Nip-HV	OD	Chr11_18123152	11	16479377	18239479	0.0703695	-0.239575	-5.83132	LOC_Os11g30980		retrotransposon protein, putative, unclassified, expressed
CS-KGW-ind-Nip-HV	OD	Chr9_18162473	9	17194837	18184604	0.154203	-0.479063	-3.11799	LOC_Os09g29840		heat shock protein, putative, expressed
CS-KGW-ind-Nip-HV	D	Chr5_18808818	5	18482238	20281131	0.111781	0.161984	1.41573	LOC_Os05g32070		LRP1, putative, expressed
CS-KGW-ind-Nip-HV	OD	Chr9_18774717	9	18195911	19701286	0.0232249	-0.644212	-56.3893	LOC_Os09g31170		expressed protein
CS-KGW-ind-Nip-HV	OD	Chr7_928927	7	363050	1162571	0.0436155	-0.392249	-11.7998	LOC_Os07g02720		expressed protein
CS-KGW-ind-Nip-HV	OD	Chr9_1559371	9	684771	1559371	0.172555	0.447677	8.60089	LOC_Os09g02270		cyclase family protein, putative, expressed
CS-KGW-ind-Nip-HV	A	Chr1_19066449	1	17070959	19066449	0.205049	-0.0551475	-0.405517	LOC_Os01g32760		hypothetical protein
CS-KGW-ind-Nip-HV	OD	Chr10_3505456	10	3031517	3514441	0.0842004	0.223232	3.73135	LOC_Os10g06500		expressed protein
CS-KGW-ind-Nip-HV	OD	Chr2_35015945	2	34999320	35024273	0.0694372	-0.18116	-2.66729	LOC_Os02g57150		tubulin-specific chaperone A, putative, expressed
CS-KGW-ind-Nip-HV	OD	Chr7_1628303	7	1614605	1702098	0.0483836	-0.33415	-46.6816	LOC_Os07g03880		lectin-like receptor kinase, putative, expressed
CS-KGW-ind-Nip-HV	OD	Chr6_6201927	6	5805138	6209320	0.0361563	0.215242	19.5782	LOC_Os06g11630		OsFBX192 - F-box domain containing protein, expressed
CS-KGW-ind-Nip-HV	OD	Chr9_18162473	9	17194837	18184604	0.154203	-0.479063	-3.11799	LOC_Os09g29870		expressed protein
CS-KGW-ind-Nip-HV	OD	Chr11_18123152	11	16479377	18239479	0.0703695	-0.239575	-5.83132	LOC_Os11g31250		expressed protein
CS-KGW-ind-Nip-HV	OD	Chr11_18123152	11	16479377	18239479	0.0703695	-0.239575	-5.83132	LOC_Os11g30660		conserved hypothetical protein
CS-KGW-ind-Nip-HV	OD	Chr11_18239505	11	18239505	18438494	0.0411279	-0.586058	-160.082	LOC_Os11g31400		expressed protein
CS-KGW-ind-Nip-HV	OD	Chr12_3191395	12	3190983	3528899	0.10104	-0.662626	-6.7209	LOC_Os12g06590		retrotransposon protein, putative, Ty1-copia subclass
CS-KGW-ind-Nip-HV	D	Chr1_11469735	1	11469735	12264898	0.255041	0.194559	0.766779	LOC_Os01g20730		expressed protein
CS-KGW-ind-Nip-HV	OD	Chr2_22297810	2	22297543	22325169	0.159896	-0.495704	-3.09282	LOC_Os02g36924		OsMADS27 - MADS-box family gene with MIKCc type-box, expressed
CS-KGW-ind-Nip-HV	OD	Chr7_1776133	7	1702276	2281742	0.0286218	-0.451322	-89.9622	LOC_Os07g04820		protein kinase, putative, expressed
CS-KGW-ind-Nip-HV	OD	Chr12_2640458	12	2625589	2655473	0.121764	0.641149	5.49227	LOC_Os12g05709		F-box domain containing protein, expressed
CS-KGW-ind-Nip-HV	OD	Chr10_2141372	10	2130568	2191771	0.0168408	0.272711	175.702	LOC_Os10g04500		hypothetical protein
CS-KGW-ind-Nip-HV	OD	Chr10_1564966	10	1177791	1622388	0.0121466	0.251068	59.1391	LOC_Os10g03510		hypothetical protein
CS-KGW-ind-Nip-HV	OD	Chr11_18239505	11	18239505	18438494	0.0411279	-0.586058	-160.082	LOC_Os11g31530		BRASSINOSTEROID INSENSITIVE 1-associated receptor kinase 1 precursor, putative, expressed
CS-KGW-ind-Nip-HV	OD	Chr7_22936110	7	22679564	22989891	0.0967549	-0.185995	-1.99951	LOC_Os07g38270		insulin-degrading enzyme, putative, expressed
[truncated: 17,979 more rows]
[truncated: 2 more columns]
