# Supplementary material for: Large scale genomic and transcriptomic profiles of rice hybrids revealed a novel universal mechanism underlying yield heterosis
Source: Research Square preprint supplement (doi:10.21203/rs.3.rs-753426/v1), 2021-08-17
Supplement: Supplementary file 21 [file d1b968019f549823b533e2f2.xlsx]

## Sheet: Sheet1
Supplementary Table 6 Summary of the QTLs identified by GWAS in F1 populations
Trait	Combination	Changsha				Sanya			Colocalized QTLs between two environments (%)
		QTL number	PVE average (%) *	PVE range (%)		QTL number	PVE average (%)	PVE range (%)
PBP	J×Nip	44	11.07	7.54-14.61		37	14.76	10.74-19.53	4(9.09)
	J×9311	19	16.98	14.74-19.90		18	22.4	18.67-27.10	0(0)
	I×Nip	45	11.68	7.88-18.12		76	11.24	7.94-18.45	6(13.3)
	I×9311	64	12.13	8.82-17.54		31	11.93	8.68-21.54	1(1.56)
SBP	J×Nip	50	12.94	8.68-19.13		51	13.95	9.34-18.8	12(24.00)
	J×9311	28	18.55	14.63-23.37		32	20.45	15.82-27.48	2(7.14)
	I×Nip	37	10.21	6.66-15.87		73	10.77	7.22-18.29	2(5.41)
	I×9311	33	11.42	9.22-15.75		21	11.22	8.32-13.98	1(3.03)
GNP	J×Nip	60	12.24	8.35-20.26		40	13.47	9.4-21.11	5(8.33)
	J×9311	28	16.44	12.29-21.9		27	21.71	15.87-29.98	2(7.14)
	I×Nip	40	9.95	6.88-16.75		62	11.13	7.64-17.02	3(7.50)
	I×9311	49	11.57	8.94-18.57		30	11.79	9.61-14.41	3(6.12)
KGW	J×Nip	27	19.82	41.20-31.94		51	17.05	11.55-26.36	7(25.93)
	J×9311	47	25.98	19.36-39.22		17	23.55	20.65-27.94	2(4.26)
	I×Nip	61	10.94	8.15-16.72		82	12.63	8.94-18.01	15(24.59)
	I×9311	46	16.69	12.11-22.74		27	11.43	8.77-15.31	0(0)
PNP	J×Nip	31	15.526	11.80-21.33		55	21.25	13.76-42.49	6(19.35)
	J×9311	14	20.89	15.19-33.26		14	22.03	16.10-29.75	0(0)
	I×Nip	53	10.71	8-64-16.20		88	11.17	7.85-20.13	17(32.08)
	I×9311	32	14.84	11.94-22.26		33	13.27	8.91-17.37	2(6.25)
GWP	J×Nip	9	18.1017	14.46-20.30		16	16.67	13.33-18.10	0(0)
	I×9311	11	16.43	13.60-19.88		14	16.22	12.84-20.89	0(0)
* PVE, means the phenotypic variation explained by dientified QTLs.
