# Supplementary material for: Large scale genomic and transcriptomic profiles of rice hybrids revealed a novel universal mechanism underlying yield heterosis
Source: Research Square preprint supplement (doi:10.21203/rs.3.rs-753426/v1), 2021-08-17
Supplement: Supplementary file 22 [file e0134652db06bd1d6ba892ed.xlsx]

## Sheet: Sheet1
Supplementary Table 1 The List of rice varieties used in this study
Accessions ID	Variety name	Geographical origin	Subspecies	Sequence depth
B001	BLACK_LABEL	North Korea	japonica	27.0652
B002	SANSUI_KAM	Japan	japonica	14.1024
B003	ZAOSHENGBAI	Japan	japonica	16.2368
B004	QIUGUANGTENGXI104	Japan	japonica	21.8878
B005	WANSHI	Japan	japonica	16.8171
B006	YIKONG	Vietnam	indica	16.1681
B007	TIANHANDAO	Vietnam	indica	14.6425
B008	BAXIANG	Vietnam	japonica	15.1111
B009	VIETNAM_EARLY_RICE	Vietnam	indica	15.0832
B010	MALAY_RED	Malaysia	indica	16.9114
B011	CO22	India	indica	17.8236
B012	2037/RAJAHAMSAL	India	indica	22.9501
B013	SRI_LANKA1	Sri Lanka	indica	12.1103
B014	UZI_ROTH215	Russa	japonica	11.3941
B015	KAHA_MU	Romania	indica	21.5747
B016	OMIRT168	Hungary	japonica	19.0141
B017	ARTI_CARE	Bulgaria	japonica	17.9555
B018	US_RICE_YELLOW_SHELL	USA	japonica	21.6377
B019	BREDA_A-75	Mexico	indica	12.8906
B020	GUINEA_RICE	Guinea	japonica	12.5594
B021	SELN244A6-20	Australia	indica	13.3557
B023	AUTUMN_KOREA	North Korea	japonica	15.6631
B024	SIAM_ROSE_RED	Thailand	indica	13.3666
B025	DJANDA_MANDJA	Indonesia	japonica	9.78444
B026	PADI_LADANG_ASE_POLO_KOMEK	Indonesia	indica	21.4946
B027	C894-21	Philippines	indica	16.086
B028	IR10179-23-1-3	IRRI	indica	13.1044
B029	DUMAI	India	indica	7.94667
B030	JAIBATTEY	India	indica	6.2554
B031	NGATSIN	India	indica	14.1565
B032	ROHINI	India	indica	14.6705
B033	BW293-2	Sri Lanka	indica	15.3628
B034	ALBANIA_SPECIES	Albania	japonica	16.9408
B035	AMERICAN_RICE	USA	indica	7.99091
B036	JIJUCAS_CLARO	Brizil	japonica	17.1082
B037	NANOAY_P.A	Argentina	japonica	9.24486
B038	NABATED_A_SMAR	Egypt	japonica	13.365
B039	IRAT10	Cote d Ivoire	indica	20.4517
B040	K24	Uganda	indica	20.2282
B043	YR83-23-11	Australia	japonica	14.8554
B044	MITA_WAXY	Japan	indica	9.87843
B045	GONGCHENGXIANG	Japan	japonica	19.8167
B046	AKITA_KOMACHI	Japan	japonica	19.2726
B047	ZHENFU8	Japan	japonica	11.3048
B048	CISOKAN	Indonesia	indica	9.05921
B049	WEEDY_RICE13	Nepal	Aus	14.8616
B051	GZ1368-5-4	Egypt	indica	13.7318
B052	J34	Madgascar	indica	17.3013
B053	80A97YR303-304-1-3	Australia	japonica	14.6067
B054	80050YR72136-43	Australia	japonica	11.8888
B055	YR196	Australia	japonica	11.1685
B056	TIEGANWU	China	japonica	14.2418
B057	XIUSHUI115	China	japonica	10.6027
B058	ERJIUNAN1	China	indica	11.9646
B059	NANJING11	China	indica	15.2309
B060	AIJIAONANTE	China	indica	10.2829
B061	GAUNGLUAI4	China	indica	18.6683
B062	NANTEHAO	China	indica	13.1229
B063	GUICHAO2	China	indica	9.20926
B064	XIANGZAOXIAN7	China	indica	14.1778
B065	HUANGSIGUIZHAN	China	indica	13.0411
B066	GUANGKEXIANGNUO	China	japonica	18.6114
B067	FUNINGZIPIJINGZI	China	indica	11.2915
B068	GAOYANGDIANDAHONGMANG	China	japonica	14.0768
B069	DANDONGLUDAO	China	japonica	13.054
B070	LAOGUANGTOU83	China	japonica	20.2927
B071	MUXIQIU	China	japonica	13.2249
B072	QIUQIANBAI	China	indica	7.95143
B073	JINXIBAI	China	indica	20.7583
B074	TAISHANNUO	China	indica	17.4694
B075	JINBAOYIN	China	indica	7.87664
B076	MINBEIWANXIAN	China	indica	16.2458
B077	YIZHIXIANG	China	japonica	11.5288
B079	ERSINIU	China	indica	16.6696
B081	HEIDU4	China	indica	19.8393
B082	QIYUEXIAN	China	indica	11.6665
B083	DONGTINGWANXIAN/3702	China	indica	13.0474
B084	BAWANGBIAN1	China	japonica	14.2657
B085	XUGUNUO	China	indica	11.2275
B086	MUGUANUO	China	japonica	14.8006
B087	ZHONGNONG4	China	indica	5.32035
B088	SANBANGQISHILUO	China	indica	8.61076
B089	QITOUBAIGU	China	indica	15.1925
B090	ZIMI	China	indica	15.0164
B091	XIAOHONGGU	China	indica	15.7479
B092	GONGJU73	China	indica	15.006
B093	QITOUGU	China	indica	8.57464
B094	ZINUO	China	indica	18.8539
B095	MOWANGGUNEI	China	indica	16.2806
B096	JINZHINUO	China	indica	14.9333
B097	JIXUENUO	China	indica	23.2693
B100	HONGKEZHENUO/2	China	japonica	17.028
B101	YANGKENUO	China	japonica	8.84564
B102	MAGUZI	China	japonica	11.1221
B103	LAOHONGDAO	China	japonica	14.2567
B104	JIABALA	China	indica	12.8461
B105	BAOXUAN21	China	indica	13.4037
B106	WENXIANGNUO	China	indica	11.5622
B107	DAWANNUO	China	indica	16.6464
B108	XIANGGU	China	indica	11.9863
B109	LENGSHUIGU2	China	japonica	14.1152
B110	HUANGPINUO	China	japonica	12.8698
B111	ZIMANGFEIeNUO	China	japonica	15.6602
B112	LIUSHA1	China	indica	9.50016
B113	CHENWAN3	China	indica	16.5496
B114	CHENGDUAI3	China	indica	12.8083
B115	AIMAKANG	China	indica	14.4172
B116	SHUFU101	China	indica	17.3318
B117	LIXINJING	China	japonica	6.73727
B118	ERGANGAI	China	indica	12.3501
B119	GUANGLUAI15-1	China	indica	12.043
B120	HONGWAN1	China	indica	6.58974
B121	LUKE3	China	indica	13.5336
B122	LIAOJING287	China	japonica	11.106
B123	ZAOSHUXIANGHEI	China	indica	16.6173
B124	JING87-304	China	japonica	15.0569
B125	XIANGWANXIAN3	China	indica	19.2383
B126	ZAOXIAN240	China	indica	10.0043
B127	DANGYU5	China	indica	11.7792
B128	SIBEITICHAO63	China	indica	10.7458
B129	HONGAINUO	China	indica	15.6102
B130	WANLIXIAN	China	indica	13.7612
B131	AIZIZHAN	China	indica	13.6598
B132	XIAOBAIMI	China	indica	8.75458
B133	YANSHUICHI	China	indica	10.7008
B134	XISHEN15	China	japonica	10.4921
B135	HONGJINGHANGU	China	indica	11.6908
B136	YUYANNUO	China	japonica	10.5161
B137	80B	China	indica	6.51361
B138	GU154	China	indica	7.20992
B139	IR661-1	China	indica	15.1942
B140	PEIC122	China	indica	12.9163
B141	JING7623	China	japonica	8.58116
B142	NINGHUI21	China	japonica	9.37176
B143	76-1	China	japonica	15.0575
B144	HUHUI628	China	japonica	5.10061
B145	TEQINGXUANHUI	China	indica	7.7609
B146	JWR221	China	indica	6.33907
B147	BAIKEHANHE	China	indica	11.8247
B148	LENGSHUINUO	China	japonica	9.45665
B149	HAOXIANG	China	indica	17.717
B150	L301B	China	indica	13.0168
B151	JINNANTE43B	China	indica	9.5188
B152	ZAOSHUNONGHU6B	China	japonica	13.719
B153	QINGSIAI16B	China	indica	7.92883
B154	LIMINB	China	japonica	12.5609
B155	BAOXIE7B	China	indica	9.0212
B156	GZHENSHAN97B	China	indica	12.2965
B157	88B	China	indica	21.5902
B158	TAICHUNG65	China	indica	15.4392
B159	TAICHUNG_NATIVE1	China	indica	12.894
B160	SHUIYUAN300	China	japonica	22.1138
B161	YELICANGHUA	China	japonica	13.744
B162	HUANGKEZAONIANRI	China	japonica	22.2899
B163	LIUSHIZAO	China	indica	14.893
B164	QINGKE	China	Aus	16.2695
B165	HAOHUANGLA	China	indica	9.15346
B166	JIANGHUARICE	North Korea	japonica	4.20032
B167	EARLY_CHONGJIN	North Korea	japonica	19.0038
B168	TAKEHARA	Japan	japonica	11.8106
B169	LOW_YU	Japan	japonica	8.50933
B170	RED90	Russa	japonica	12.1533
B171	RINGO	Italy	japonica	11.0691
B173	TJANTAJAN	Indonesia	indica	12.1889
B176	BRC25-146-2-1	Bangladesh	indica	16.6383
B179	CRODOB	France	japonica	11.9686
B180	P1790-5-1M-4-5M-1B-3M-B	Columbia	indica	11.3327
B181	71011	Australia	indica	4.46072
B182	REDHEAD	Japan	japonica	24.4005
B183	CLEAR_WAXY	Japan	japonica	19.4491
B184	CHANH148	Vietnam	indica	7.70292
B185	SLK2-18-2	Laos	indica	5.02349
B187	RP1570-44-1	India	indica	6.63861
B188	IRAT36	Cote d Ivoire	japonica	9.5897
B189	IRAT669	Cote d Ivoire	japonica	10.0949
B190	ITA221	Nigeria	japonica	21.1186
B191	80A60YR71009-1-5	Australia	japonica	19.5078
B192	R42	USA	indica	13.8308
B193	C.MEDIO7	Cuba	indica	7.96443
B194	ECIA179-S13	Cuba	indica	7.59566
B195	PMS10B	India	indica	9.70875
B196	TAITUNG_UPLAND328	China	japonica	15.1756
B197	TAIZHONGXIANXUAN220	China	indica	18.1561
B198	JIEFANGXIAN	China	indica	7.78094
B199	HONGMISANDANBAI	China	japonica	8.00177
B200	JINYOU1	China	indica	7.75576
B201	CHENGNONGSHUIJINGMI	China	indica	8.42072
B202	BAOXIE123B	China	indica	5.82504
B203	BIWUSHENG	China	indica	3.85652
B204	LONGHUAMAOHULU	China	japonica	26.56
B205	CUNSANLI	China	japonica	13.9929
B207	AIHECHI	China	indica	6.95726
B208	LUCAIHAO	China	indica	27.1371
B210	NANXIONGZAOYOUZHAN	China	indica	24.19
B212	CHIKENUO	China	japonica	23.1722
B213	LIUYEZHAN	China	indica	8.02251
B214	XUANENCHANGTANQINGZHAN	China	indica	26.0037
B215	HONGQI5	China	japonica	14.8107
B216	HANMADAO	China	indica	20.3239
B217	HONGGU	China	indica	17.8514
B218	WUZIDUI	China	japonica	16.2977
B219	HAOLAI	China	indica	11.0178
B221	FANHAOPI	China	indica	20.7642
B222	BEIZINUO	China	indica	13.7715
B223	CUNGUNUO	China	japonica	12.9759
B224	YOUZHAN	China	indica	12.1208
B225	GUANTUIBAIHE1	China	japonica	17.3999
B226	HEIMANGDAO	China	japonica	18.6003
B227	MENJIAGAO1	China	indica	7.90873
B228	HAOBAYONG1	China	japonica	14.1492
B229	MENJIADING2	China	indica	17.6454
B230	BANJIEMANG	China	japonica	15.8505
B231	DONGTINGWANXIAN	China	indica	9.56772
B232	XIANGAIZAO10	China	indica	13.0161
B233	XIANGWANXIAN1	China	indica	12.8125
B234	AITUOGU151	China	indica	12.0238
B235	ZHONGHUA8	China	japonica	18.2572
B236	JINDAO1	China	japonica	17.331
B238	MOMI	China	indica	8.75603
B239	ZHENXIAN232	China	indica	6.67845
B240	ZHENGDAO5	China	japonica	12.8664
B241	LAMUJIA	China	japonica	16.0773
B242	GUI630	China	indica	8.06786
B243	XIANGHUI91269	China	Aus	15.1428
B244	XIANGDAO	China	indica	7.12556
B245	SHANJIUGU	China	japonica	13.4054
B246	LAOZAOGU	China	indica	11.8993
B247	JINNANTEB	China	indica	16.5601
B248	ZHUZHENB	China	indica	9.30775
B249	CHAOYANG1B	China	indica	14.4542
B250	ANNONGWANJINGB	China	japonica	21.3091
B252	XIANGAIB	China	indica	13.8621
B253	JIANGNONGZAO1B	China	indica	25.6522
B254	JINGHUB	China	indica	17.3792
B255	DIANRUI409B	China	indica	7.76609
B258	XINGGUO	China	japonica	16.1191
B259	LEIHUOZHAN	China	indica	13.6506
B260	MAMAGU	China	indica	7.62414
B261	MEIHUANUO	China	indica	21.6899
B263	WEIGUO	China	japonica	10.1523
B264	SANBAILI	China	indica	27.413
B265	WUKEZHAN	China	indica	30.2058
B266	HAOMAKE/K	China	japonica	14.8371
B268	NANGAOGU	China	indica	10.6614
B269	YUEFU	Japan	japonica	28.9319
YB10_1	IAC150/76	Brizil	japonica	11.001
YB1_1	80A90YR72078-25	Australia	japonica	3.57429
YB11_1	IRAT 266	Cote d Ivoire	japonica	3.04652
YB12_1	HAOBUKA	China	japonica	1.94946
YB14_1	Khao Mack Kheua	Laos	japonica	1.65558
YB15_1	MAWEINUO	China	indica	2.52837
YB16_1	AIYISI	Vietnam	indica	3.77567
YB17_1	Kalijira 245	Pakistan	japonica	3.03737
YB18_1	SIMIAO	China	indica	4.02378
YB19_1	NANTIANGANJIU	China	japonica	3.21563
YB20_1	XIMAXIAN	China	japonica	3.36862
YB2_1	BENBANGGU	China	japonica	5.14836
YB22_1	IRAT109	IRRI	japonica	5.34965
YB24_1	HAOGELAO	China	japonica	2.26298
YB4_1	RNR 67580	India	indica	2.53848
YB5_1	SANKECUN	China	indica	3.22656
YB6_1		Albania	japonica	2.31249
YB7_1	BAIMAODAO	China	japonica	10.0732
YB8_1	FEIENUO2	China	japonica	4.06263
YB9_1	JC78	India	indica	7.85109
Nipponbare	Nipponbare	Japan	japonica	Reference
9311	9311	China	indica	12.453
