# Supplementary material for: Large scale genomic and transcriptomic profiles of rice hybrids revealed a novel universal mechanism underlying yield heterosis
Source: Research Square preprint supplement (doi:10.21203/rs.3.rs-753426/v1), 2021-08-17
Supplement: Supplementary file 23 [file f8629eb0bc061161089d813f.xlsx]

## Sheet: Sheet1
Supplementary Table 7 Summary of the QTLs identified by GWAS using the middle parent heterosis values
Trait	Combination	Changsha				Sanya			Colocalized QTLs between two environments (%)
		QTL number	PVE average (%) *	PVE range (%)		QTL number	PVE average (%)	PVE range (%)
PBP	J×Nip	38	14.6771	10.95-20.68		25	17.1327	13.80-22.04	2(5.26)
	J×93-11	20	22.0807	19.01-27.50		16	19.0278	15.10-24.68	0(0)
	I×Nip	13	11.2663	8.35-18.02		60	9.49535	6.42-14.27	1(7.69)
	I×93-11	46	13.5695	10.26-18.95		36	11.6813	8.68-17.44	0(0)
SBP	J×Nip	36	14.9471	19.04-47.61		22	18.0465	2.35-48.21	5(13.89)
	J×93-11	17	17.4479	13.24-20.61		22	15.2745	11.62-18.81	1(5.88)
	I×Nip	29	10.2379	7.51-13.14		45	10.088	7.38-16.10	5(17.24)
	I×93-11	25	13.2821	10.72-22.13		27	10.8105	8.52-15.02	0(0)
SPP	J×Nip	43	16.6956	12.23-24.39		33	17.97	12.81-28.33	0(0)
	J×93-11	19	18.7042	16.15-24.91		25	18.3312	14.01-27.68	0(0)
	I×Nip	33	10.66	7.31-17.77		54	9.44574	7.16-13.79	6(18.18)
	I×93-11	39	12.9213	9.41-20.67		30	10.8417	7.94-15.98	1(2.56)
KGW	J×Nip	32	22.0966	15.80-31.13		45	15.9381	11.96-20.75	3(9.38)
	J×93-11	8	26.4097	23.41-32.18		18	23.1415	20.71-27.90	0(0)
	I×Nip	83	15.5085	10.86-27.97		88	12.5861	9.71-20.63	18(21.69)
	I×93-11	29	25.39	18.53-30.88		35	11.27	8.30-14.73	1(3.45)
PNP	J×Nip	56	19.7	14.54-25.45		49	21.12	14.08-39.7	10(17.86)
	J×93-11	7	29.98	25.62-34.51		13	23.34	17.05-29.74	0(0)
	I×Nip	26	12.69	9.60-17.77		100	11.66	7.93-23.31	10(38.46)
	I×93-11	21	17.84	14.44-22.51		46	10.57	7.48-14.88	1(4.76)
GWP	J×Nip	9	22.57	17.60-28.96		11	15.81	13.24-19.03	1(11.11)
	I×93-11	7	24.22	20.57-27.48		18	12.6	9.95-15.39	0(0)
* PVE, means the phenotypic variation explained by dientified QTLs.
