# Supplementary material for: Large scale genomic and transcriptomic profiles of rice hybrids revealed a novel universal mechanism underlying yield heterosis
Source: Research Square preprint supplement (doi:10.21203/rs.3.rs-753426/v1), 2021-08-17
Supplement: Supplementary file 24 [file fb3eb70af468f30f10bfdc18.xlsx]

## Sheet: Sheet1
Supplementary Table 14 The GO enrichment of candiate genes within non-additive QTLs that can be identified repeatedly.
Genetic effect Type	Times of being identified	Trait	GO_accession	Term type	Term	Query item	Query total	Background item	Background total	Pvalue	FDR	Gene entries	Annotation in MSU7
D or OD	>=4	SPP	GO:0030145	F	manganese ion binding	7	311	58	24075	1.9e-05	0.007	LOC_Os08g08970	Cupin domain containing protein, expressed
D or OD	>=4	SPP	GO:0030145	F	manganese ion binding	7	311	58	24075	1.9e-05	0.007	LOC_Os08g09080	Cupin domain containing protein, expressed
D or OD	>=4	SPP	GO:0030145	F	manganese ion binding	7	311	58	24075	1.9e-05	0.007	LOC_Os08g09000	Cupin domain containing protein, expressed
D or OD	>=4	SPP	GO:0030145	F	manganese ion binding	7	311	58	24075	1.9e-05	0.007	LOC_Os08g09010	Cupin domain containing protein, expressed
D or OD	>=4	SPP	GO:0030145	F	manganese ion binding	7	311	58	24075	1.9e-05	0.007	LOC_Os08g08980	cupin domain containing protein, expressed
D or OD	>=4	SPP	GO:0030145	F	manganese ion binding	7	311	58	24075	1.9e-05	0.007	LOC_Os08g08990	Cupin domain containing protein, expressed
D or OD	>=4	SPP	GO:0030145	F	manganese ion binding	7	311	58	24075	1.9e-05	0.007	LOC_Os08g08960	Cupin domain containing protein, expressed
D or OD	>=4	SPP	GO:0045735	F	nutrient reservoir activity	7	311	77	24075	0.0001	0.018	LOC_Os08g08970	Cupin domain containing protein, expressed
D or OD	>=4	SPP	GO:0045735	F	nutrient reservoir activity	7	311	77	24075	0.0001	0.018	LOC_Os08g09080	Cupin domain containing protein, expressed
D or OD	>=4	SPP	GO:0045735	F	nutrient reservoir activity	7	311	77	24075	0.0001	0.018	LOC_Os08g09000	Cupin domain containing protein, expressed
D or OD	>=4	SPP	GO:0045735	F	nutrient reservoir activity	7	311	77	24075	0.0001	0.018	LOC_Os08g09010	Cupin domain containing protein, expressed
D or OD	>=4	SPP	GO:0045735	F	nutrient reservoir activity	7	311	77	24075	0.0001	0.018	LOC_Os08g08980	cupin domain containing protein, expressed
D or OD	>=4	SPP	GO:0045735	F	nutrient reservoir activity	7	311	77	24075	0.0001	0.018	LOC_Os08g08990	Cupin domain containing protein, expressed
D or OD	>=4	SPP	GO:0045735	F	nutrient reservoir activity	7	311	77	24075	0.0001	0.018	LOC_Os08g08960	Cupin domain containing protein, expressed
D or OD	>=4	SPP	GO:0048046	C	apoplast	7	311	95	24075	0.00034	0.035	LOC_Os08g08970	Cupin domain containing protein, expressed
D or OD	>=4	SPP	GO:0048046	C	apoplast	7	311	95	24075	0.00034	0.035	LOC_Os08g09080	Cupin domain containing protein, expressed
D or OD	>=4	SPP	GO:0048046	C	apoplast	7	311	95	24075	0.00034	0.035	LOC_Os08g09000	Cupin domain containing protein, expressed
D or OD	>=4	SPP	GO:0048046	C	apoplast	7	311	95	24075	0.00034	0.035	LOC_Os08g09010	Cupin domain containing protein, expressed
D or OD	>=4	SPP	GO:0048046	C	apoplast	7	311	95	24075	0.00034	0.035	LOC_Os08g08980	cupin domain containing protein, expressed
D or OD	>=4	SPP	GO:0048046	C	apoplast	7	311	95	24075	0.00034	0.035	LOC_Os08g08990	Cupin domain containing protein, expressed
D or OD	>=4	SPP	GO:0048046	C	apoplast	7	311	95	24075	0.00034	0.035	LOC_Os08g08960	Cupin domain containing protein, expressed
D or OD	>=3	SBP	GO:0003676	F	nucleic acid binding	667	1632	8251	24075	4.8e-08	4.4e-05	LOC_Os10g11580	histone-like transcription factor and archaeal histone, putative, expressed
D or OD	>=3	SBP	GO:0003676	F	nucleic acid binding	667	1632	8251	24075	4.8e-08	4.4e-05	LOC_Os03g33300	retrotransposon, putative, centromere-specific, expressed
D or OD	>=3	SBP	GO:0003676	F	nucleic acid binding	667	1632	8251	24075	4.8e-08	4.4e-05	LOC_Os04g05970	retrotransposon protein, putative, Ty3-gypsy subclass, expressed
D or OD	>=3	SBP	GO:0003676	F	nucleic acid binding	667	1632	8251	24075	4.8e-08	4.4e-05	LOC_Os08g09140	retrotransposon protein, putative, Ty3-gypsy subclass, expressed
D or OD	>=3	SBP	GO:0003676	F	nucleic acid binding	667	1632	8251	24075	4.8e-08	4.4e-05	LOC_Os07g22750	retrotransposon, putative, centromere-specific, expressed
D or OD	>=3	SBP	GO:0003676	F	nucleic acid binding	667	1632	8251	24075	4.8e-08	4.4e-05	LOC_Os03g34170	retrotransposon protein, putative, unclassified, expressed
D or OD	>=3	SBP	GO:0003676	F	nucleic acid binding	667	1632	8251	24075	4.8e-08	4.4e-05	LOC_Os07g23460	retrotransposon protein, putative, Ty1-copia subclass, expressed
D or OD	>=3	SBP	GO:0003676	F	nucleic acid binding	667	1632	8251	24075	4.8e-08	4.4e-05	LOC_Os04g42010	RNA binding protein, putative, expressed
D or OD	>=3	SBP	GO:0003676	F	nucleic acid binding	667	1632	8251	24075	4.8e-08	4.4e-05	LOC_Os04g04150	retrotransposon protein, putative, Ty3-gypsy subclass, expressed
D or OD	>=3	SBP	GO:0003676	F	nucleic acid binding	667	1632	8251	24075	4.8e-08	4.4e-05	LOC_Os04g06374	retrotransposon protein, putative, Ty3-gypsy subclass, expressed
D or OD	>=3	SBP	GO:0003676	F	nucleic acid binding	667	1632	8251	24075	4.8e-08	4.4e-05	LOC_Os10g12030	retrotransposon protein, putative, unclassified, expressed
D or OD	>=3	SBP	GO:0003676	F	nucleic acid binding	667	1632	8251	24075	4.8e-08	4.4e-05	LOC_Os04g05220	retrotransposon protein, putative, Ty3-gypsy subclass
D or OD	>=3	SBP	GO:0003676	F	nucleic acid binding	667	1632	8251	24075	4.8e-08	4.4e-05	LOC_Os12g31800	glycine-rich RNA-binding protein 7, putative, expressed
D or OD	>=3	SBP	GO:0003676	F	nucleic acid binding	667	1632	8251	24075	4.8e-08	4.4e-05	LOC_Os12g33530	retrotransposon protein, putative, Ty3-gypsy subclass, expressed
D or OD	>=3	SBP	GO:0003676	F	nucleic acid binding	667	1632	8251	24075	4.8e-08	4.4e-05	LOC_Os10g22250	retrotransposon protein, putative, Ty3-gypsy subclass, expressed
D or OD	>=3	SBP	GO:0003676	F	nucleic acid binding	667	1632	8251	24075	4.8e-08	4.4e-05	LOC_Os05g24730	retrotransposon protein, putative, unclassified
D or OD	>=3	SBP	GO:0003676	F	nucleic acid binding	667	1632	8251	24075	4.8e-08	4.4e-05	LOC_Os03g33760	retrotransposon protein, putative, unclassified, expressed
D or OD	>=3	SBP	GO:0003676	F	nucleic acid binding	667	1632	8251	24075	4.8e-08	4.4e-05	LOC_Os03g34190	retrotransposon protein, putative, Ty3-gypsy subclass, expressed
D or OD	>=3	SBP	GO:0003676	F	nucleic acid binding	667	1632	8251	24075	4.8e-08	4.4e-05	LOC_Os01g10504	OsMADS3 - MADS-box family gene with MIKCc type-box, expressed
D or OD	>=3	SBP	GO:0003676	F	nucleic acid binding	667	1632	8251	24075	4.8e-08	4.4e-05	LOC_Os03g15590	eukaryotic translation initiation factor, putative, expressed
D or OD	>=3	SBP	GO:0003676	F	nucleic acid binding	667	1632	8251	24075	4.8e-08	4.4e-05	LOC_Os08g24240	retrotransposon protein, putative, Ty3-gypsy subclass
D or OD	>=3	SBP	GO:0003676	F	nucleic acid binding	667	1632	8251	24075	4.8e-08	4.4e-05	LOC_Os03g33940	retrotransposon protein, putative, unclassified, expressed
D or OD	>=3	SBP	GO:0003676	F	nucleic acid binding	667	1632	8251	24075	4.8e-08	4.4e-05	LOC_Os06g38260	retrotransposon protein, putative, Ty3-gypsy subclass, expressed
D or OD	>=3	SBP	GO:0003676	F	nucleic acid binding	667	1632	8251	24075	4.8e-08	4.4e-05	LOC_Os12g33950	MYB family transcription factor, putative, expressed
D or OD	>=3	SBP	GO:0003676	F	nucleic acid binding	667	1632	8251	24075	4.8e-08	4.4e-05	LOC_Os03g32960	retrotransposon protein, putative, Ty3-gypsy subclass, expressed
D or OD	>=3	SBP	GO:0003676	F	nucleic acid binding	667	1632	8251	24075	4.8e-08	4.4e-05	LOC_Os04g05900	retrotransposon protein, putative, Ty3-gypsy subclass, expressed
D or OD	>=3	SBP	GO:0003676	F	nucleic acid binding	667	1632	8251	24075	4.8e-08	4.4e-05	LOC_Os08g24530	retrotransposon protein, putative, Ty3-gypsy subclass, expressed
D or OD	>=3	SBP	GO:0003676	F	nucleic acid binding	667	1632	8251	24075	4.8e-08	4.4e-05	LOC_Os04g04300	retrotransposon protein, putative, unclassified, expressed
D or OD	>=3	SBP	GO:0003676	F	nucleic acid binding	667	1632	8251	24075	4.8e-08	4.4e-05	LOC_Os07g24250	retrotransposon protein, putative, unclassified
D or OD	>=3	SBP	GO:0003676	F	nucleic acid binding	667	1632	8251	24075	4.8e-08	4.4e-05	LOC_Os12g30050	transposon protein, putative, unclassified, expressed
D or OD	>=3	SBP	GO:0003676	F	nucleic acid binding	667	1632	8251	24075	4.8e-08	4.4e-05	LOC_Os03g33780	retrotransposon protein, putative, Ty3-gypsy subclass, expressed
D or OD	>=3	SBP	GO:0003676	F	nucleic acid binding	667	1632	8251	24075	4.8e-08	4.4e-05	LOC_Os01g59660	MYB family transcription factor, putative, expressed
D or OD	>=3	SBP	GO:0003676	F	nucleic acid binding	667	1632	8251	24075	4.8e-08	4.4e-05	LOC_Os07g33340	DEAD-box ATP-dependent RNA helicase, putative, expressed
D or OD	>=3	SBP	GO:0003676	F	nucleic acid binding	667	1632	8251	24075	4.8e-08	4.4e-05	LOC_Os06g39240	endothelial differentiation-related factor 1, putative, expressed
D or OD	>=3	SBP	GO:0003676	F	nucleic acid binding	667	1632	8251	24075	4.8e-08	4.4e-05	LOC_Os06g43150	retrotransposon protein, putative, unclassified, expressed
D or OD	>=3	SBP	GO:0003676	F	nucleic acid binding	667	1632	8251	24075	4.8e-08	4.4e-05	LOC_Os03g26630	SAP domain containing protein, expressed
D or OD	>=3	SBP	GO:0003676	F	nucleic acid binding	667	1632	8251	24075	4.8e-08	4.4e-05	LOC_Os07g38300	ribosome recycling factor, putative, expressed
D or OD	>=3	SBP	GO:0003676	F	nucleic acid binding	667	1632	8251	24075	4.8e-08	4.4e-05	LOC_Os04g29190	retrotransposon protein, putative, unclassified, expressed
D or OD	>=3	SBP	GO:0003676	F	nucleic acid binding	667	1632	8251	24075	4.8e-08	4.4e-05	LOC_Os06g38760	retrotransposon protein, putative, unclassified, expressed
D or OD	>=3	SBP	GO:0003676	F	nucleic acid binding	667	1632	8251	24075	4.8e-08	4.4e-05	LOC_Os06g50830	bZIP transcription factor domain containing protein, expressed
D or OD	>=3	SBP	GO:0003676	F	nucleic acid binding	667	1632	8251	24075	4.8e-08	4.4e-05	LOC_Os02g45040	retrotransposon protein, putative, unclassified, expressed
D or OD	>=3	SBP	GO:0003676	F	nucleic acid binding	667	1632	8251	24075	4.8e-08	4.4e-05	LOC_Os06g38603	retrotransposon protein, putative, unclassified, expressed
D or OD	>=3	SBP	GO:0003676	F	nucleic acid binding	667	1632	8251	24075	4.8e-08	4.4e-05	LOC_Os09g06820	retrotransposon protein, putative, Ty3-gypsy subclass, expressed
D or OD	>=3	SBP	GO:0003676	F	nucleic acid binding	667	1632	8251	24075	4.8e-08	4.4e-05	LOC_Os07g32690	retrotransposon protein, putative, unclassified, expressed
D or OD	>=3	SBP	GO:0003676	F	nucleic acid binding	667	1632	8251	24075	4.8e-08	4.4e-05	LOC_Os01g23200	retrotransposon protein, putative, Ty3-gypsy subclass, expressed
D or OD	>=3	SBP	GO:0003676	F	nucleic acid binding	667	1632	8251	24075	4.8e-08	4.4e-05	LOC_Os08g24870	retrotransposon protein, putative, unclassified, expressed
D or OD	>=3	SBP	GO:0003676	F	nucleic acid binding	667	1632	8251	24075	4.8e-08	4.4e-05	LOC_Os03g26229	40S ribosomal protein S9-1, putative, expressed
D or OD	>=3	SBP	GO:0003676	F	nucleic acid binding	667	1632	8251	24075	4.8e-08	4.4e-05	LOC_Os06g39906	homeobox domain containing protein, expressed
D or OD	>=3	SBP	GO:0003676	F	nucleic acid binding	667	1632	8251	24075	4.8e-08	4.4e-05	LOC_Os03g33230	retrotransposon protein, putative, unclassified, expressed
D or OD	>=3	SBP	GO:0003676	F	nucleic acid binding	667	1632	8251	24075	4.8e-08	4.4e-05	LOC_Os12g33870	retrotransposon protein, putative, unclassified, expressed
D or OD	>=3	SBP	GO:0003676	F	nucleic acid binding	667	1632	8251	24075	4.8e-08	4.4e-05	LOC_Os08g26880	bZIP transcription factor domain containing protein, expressed
D or OD	>=3	SBP	GO:0003676	F	nucleic acid binding	667	1632	8251	24075	4.8e-08	4.4e-05	LOC_Os04g29270	retrotransposon protein, putative, unclassified, expressed
D or OD	>=3	SBP	GO:0003676	F	nucleic acid binding	667	1632	8251	24075	4.8e-08	4.4e-05	LOC_Os06g39960	bZIP transcription factor domain containing protein, expressed
D or OD	>=3	SBP	GO:0003676	F	nucleic acid binding	667	1632	8251	24075	4.8e-08	4.4e-05	LOC_Os03g28010	retrotransposon protein, putative, unclassified, expressed
D or OD	>=3	SBP	GO:0003676	F	nucleic acid binding	667	1632	8251	24075	4.8e-08	4.4e-05	LOC_Os01g60490	WRKY22, expressed
D or OD	>=3	SBP	GO:0003676	F	nucleic acid binding	667	1632	8251	24075	4.8e-08	4.4e-05	LOC_Os12g33090	zinc finger family protein, putative, expressed
D or OD	>=3	SBP	GO:0003676	F	nucleic acid binding	667	1632	8251	24075	4.8e-08	4.4e-05	LOC_Os08g24320	retrotransposon protein, putative, unclassified, expressed
D or OD	>=3	SBP	GO:0003676	F	nucleic acid binding	667	1632	8251	24075	4.8e-08	4.4e-05	LOC_Os07g25230	retrotransposon protein, putative, unclassified, expressed
D or OD	>=3	SBP	GO:0003676	F	nucleic acid binding	667	1632	8251	24075	4.8e-08	4.4e-05	LOC_Os11g18620	retrotransposon protein, putative, Ty3-gypsy subclass, expressed
D or OD	>=3	SBP	GO:0003676	F	nucleic acid binding	667	1632	8251	24075	4.8e-08	4.4e-05	LOC_Os04g05160	retrotransposon protein, putative, Ty3-gypsy subclass, expressed
D or OD	>=3	SBP	GO:0003676	F	nucleic acid binding	667	1632	8251	24075	4.8e-08	4.4e-05	LOC_Os12g15750	retrotransposon protein, putative, Ty3-gypsy subclass, expressed
D or OD	>=3	SBP	GO:0003676	F	nucleic acid binding	667	1632	8251	24075	4.8e-08	4.4e-05	LOC_Os12g16030	retrotransposon protein, putative, unclassified, expressed
D or OD	>=3	SBP	GO:0003676	F	nucleic acid binding	667	1632	8251	24075	4.8e-08	4.4e-05	LOC_Os01g23330	retrotransposon, putative, centromere-specific, expressed
D or OD	>=3	SBP	GO:0003676	F	nucleic acid binding	667	1632	8251	24075	4.8e-08	4.4e-05	LOC_Os02g44810	tRNA pseudouridine synthase family protein, putative, expressed
D or OD	>=3	SBP	GO:0003676	F	nucleic acid binding	667	1632	8251	24075	4.8e-08	4.4e-05	LOC_Os02g44400	transposon protein, putative, unclassified, expressed
D or OD	>=3	SBP	GO:0003676	F	nucleic acid binding	667	1632	8251	24075	4.8e-08	4.4e-05	LOC_Os12g33800	retrotransposon protein, putative, unclassified
D or OD	>=3	SBP	GO:0003676	F	nucleic acid binding	667	1632	8251	24075	4.8e-08	4.4e-05	LOC_Os03g35326	retrotransposon protein, putative, unclassified, expressed
D or OD	>=3	SBP	GO:0003676	F	nucleic acid binding	667	1632	8251	24075	4.8e-08	4.4e-05	LOC_Os06g40020	DEAD-box ATP-dependent RNA helicase 52A, putative, expressed
D or OD	>=3	SBP	GO:0003676	F	nucleic acid binding	667	1632	8251	24075	4.8e-08	4.4e-05	LOC_Os03g15700	splicing factor 3A subunit 2, putative, expressed
D or OD	>=3	SBP	GO:0003676	F	nucleic acid binding	667	1632	8251	24075	4.8e-08	4.4e-05	LOC_Os09g07070	retrotransposon protein, putative, Ty3-gypsy subclass, expressed
D or OD	>=3	SBP	GO:0003676	F	nucleic acid binding	667	1632	8251	24075	4.8e-08	4.4e-05	LOC_Os10g34640	retrotransposon protein, putative, unclassified
D or OD	>=3	SBP	GO:0003676	F	nucleic acid binding	667	1632	8251	24075	4.8e-08	4.4e-05	LOC_Os12g33370	retrotransposon protein, putative, Ty3-gypsy subclass
D or OD	>=3	SBP	GO:0003676	F	nucleic acid binding	667	1632	8251	24075	4.8e-08	4.4e-05	LOC_Os08g29540	retrotransposon protein, putative, unclassified, expressed
D or OD	>=3	SBP	GO:0003676	F	nucleic acid binding	667	1632	8251	24075	4.8e-08	4.4e-05	LOC_Os01g59640	no apical meristem protein, putative, expressed
D or OD	>=3	SBP	GO:0003676	F	nucleic acid binding	667	1632	8251	24075	4.8e-08	4.4e-05	LOC_Os01g58680	apurinic endonuclease-redox protein, putative, expressed
D or OD	>=3	SBP	GO:0003676	F	nucleic acid binding	667	1632	8251	24075	4.8e-08	4.4e-05	LOC_Os01g68410	retrotransposon protein, putative, Ty3-gypsy subclass, expressed
D or OD	>=3	SBP	GO:0003676	F	nucleic acid binding	667	1632	8251	24075	4.8e-08	4.4e-05	LOC_Os01g11370	ATP-dependent RNA helicase, putative, expressed
D or OD	>=3	SBP	GO:0003676	F	nucleic acid binding	667	1632	8251	24075	4.8e-08	4.4e-05	LOC_Os06g39890	retrotransposon protein, putative, unclassified, expressed
D or OD	>=3	SBP	GO:0003676	F	nucleic acid binding	667	1632	8251	24075	4.8e-08	4.4e-05	LOC_Os07g25040	retrotransposon protein, putative, Ty3-gypsy subclass, expressed
D or OD	>=3	SBP	GO:0003676	F	nucleic acid binding	667	1632	8251	24075	4.8e-08	4.4e-05	LOC_Os03g03250	retrotransposon protein, putative, Ty3-gypsy subclass, expressed
D or OD	>=3	SBP	GO:0003676	F	nucleic acid binding	667	1632	8251	24075	4.8e-08	4.4e-05	LOC_Os01g68370	B3 DNA binding domain containing protein, expressed
D or OD	>=3	SBP	GO:0003676	F	nucleic acid binding	667	1632	8251	24075	4.8e-08	4.4e-05	LOC_Os03g03390	G-patch domain containing protein, expressed
D or OD	>=3	SBP	GO:0003676	F	nucleic acid binding	667	1632	8251	24075	4.8e-08	4.4e-05	LOC_Os01g58570	retrotransposon protein, putative, Ty3-gypsy subclass, expressed
D or OD	>=3	SBP	GO:0003676	F	nucleic acid binding	667	1632	8251	24075	4.8e-08	4.4e-05	LOC_Os03g26440	tRNA pseudouridine synthase family protein, putative, expressed
D or OD	>=3	SBP	GO:0003676	F	nucleic acid binding	667	1632	8251	24075	4.8e-08	4.4e-05	LOC_Os02g43940	AP2 domain containing protein, expressed
D or OD	>=3	SBP	GO:0003676	F	nucleic acid binding	667	1632	8251	24075	4.8e-08	4.4e-05	LOC_Os11g18600	retrotransposon protein, putative, Ty3-gypsy subclass, expressed
D or OD	>=3	SBP	GO:0003676	F	nucleic acid binding	667	1632	8251	24075	4.8e-08	4.4e-05	LOC_Os08g24730	retrotransposon protein, putative, unclassified, expressed
D or OD	>=3	SBP	GO:0003676	F	nucleic acid binding	667	1632	8251	24075	4.8e-08	4.4e-05	LOC_Os06g39020	retrotransposon protein, putative, unclassified, expressed
D or OD	>=3	SBP	GO:0003676	F	nucleic acid binding	667	1632	8251	24075	4.8e-08	4.4e-05	LOC_Os02g43970	AP2 domain containing protein, expressed
D or OD	>=3	SBP	GO:0003676	F	nucleic acid binding	667	1632	8251	24075	4.8e-08	4.4e-05	LOC_Os06g42980	retrotransposon protein, putative, unclassified, expressed
D or OD	>=3	SBP	GO:0003676	F	nucleic acid binding	667	1632	8251	24075	4.8e-08	4.4e-05	LOC_Os01g60380	retrotransposon protein, putative, Ty3-gypsy subclass, expressed
D or OD	>=3	SBP	GO:0003676	F	nucleic acid binding	667	1632	8251	24075	4.8e-08	4.4e-05	LOC_Os08g38940	retrotransposon protein, putative, Ty3-gypsy subclass, expressed
D or OD	>=3	SBP	GO:0003676	F	nucleic acid binding	667	1632	8251	24075	4.8e-08	4.4e-05	LOC_Os01g59280	retrotransposon protein, putative, unclassified
D or OD	>=3	SBP	GO:0003676	F	nucleic acid binding	667	1632	8251	24075	4.8e-08	4.4e-05	LOC_Os06g42960	retrotransposon protein, putative, unclassified, expressed
D or OD	>=3	SBP	GO:0003676	F	nucleic acid binding	667	1632	8251	24075	4.8e-08	4.4e-05	LOC_Os10g21950	retrotransposon protein, putative, Ty1-copia subclass, expressed
D or OD	>=3	SBP	GO:0003676	F	nucleic acid binding	667	1632	8251	24075	4.8e-08	4.4e-05	LOC_Os01g60220	transposon protein, putative, unclassified, expressed
D or OD	>=3	SBP	GO:0003676	F	nucleic acid binding	667	1632	8251	24075	4.8e-08	4.4e-05	LOC_Os06g43340	retrotransposon protein, putative, unclassified, expressed
D or OD	>=3	SBP	GO:0003676	F	nucleic acid binding	667	1632	8251	24075	4.8e-08	4.4e-05	LOC_Os10g11672	retrotransposon protein, putative, Ty3-gypsy subclass, expressed
D or OD	>=3	SBP	GO:0003676	F	nucleic acid binding	667	1632	8251	24075	4.8e-08	4.4e-05	LOC_Os03g34250	retrotransposon protein, putative, unclassified
D or OD	>=3	SBP	GO:0003676	F	nucleic acid binding	667	1632	8251	24075	4.8e-08	4.4e-05	LOC_Os01g60540	WRKY20, expressed
D or OD	>=3	SBP	GO:0003676	F	nucleic acid binding	667	1632	8251	24075	4.8e-08	4.4e-05	LOC_Os07g23050	retrotransposon protein, putative, unclassified, expressed
D or OD	>=3	SBP	GO:0003676	F	nucleic acid binding	667	1632	8251	24075	4.8e-08	4.4e-05	LOC_Os02g44136	retrotransposon protein, putative, Ty1-copia subclass, expressed
D or OD	>=3	SBP	GO:0003676	F	nucleic acid binding	667	1632	8251	24075	4.8e-08	4.4e-05	LOC_Os08g24650	retrotransposon protein, putative, Ty3-gypsy subclass, expressed
D or OD	>=3	SBP	GO:0003676	F	nucleic acid binding	667	1632	8251	24075	4.8e-08	4.4e-05	LOC_Os04g04700	retrotransposon protein, putative, unclassified
D or OD	>=3	SBP	GO:0003676	F	nucleic acid binding	667	1632	8251	24075	4.8e-08	4.4e-05	LOC_Os01g58760	bZIP transcription factor domain containing protein, expressed
D or OD	>=3	SBP	GO:0003676	F	nucleic acid binding	667	1632	8251	24075	4.8e-08	4.4e-05	LOC_Os03g26010	retrotransposon protein, putative, unclassified, expressed
D or OD	>=3	SBP	GO:0003676	F	nucleic acid binding	667	1632	8251	24075	4.8e-08	4.4e-05	LOC_Os09g07430	retrotransposon, putative, centromere-specific, expressed
D or OD	>=3	SBP	GO:0003676	F	nucleic acid binding	667	1632	8251	24075	4.8e-08	4.4e-05	LOC_Os08g24060	retrotransposon protein, putative, unclassified
D or OD	>=3	SBP	GO:0003676	F	nucleic acid binding	667	1632	8251	24075	4.8e-08	4.4e-05	LOC_Os08g38930	retrotransposon protein, putative, Ty3-gypsy subclass
D or OD	>=3	SBP	GO:0003676	F	nucleic acid binding	667	1632	8251	24075	4.8e-08	4.4e-05	LOC_Os08g24100	retrotransposon protein, putative, unclassified
D or OD	>=3	SBP	GO:0003676	F	nucleic acid binding	667	1632	8251	24075	4.8e-08	4.4e-05	LOC_Os04g53160	NBS-LRR disease resistance protein, putative, expressed
D or OD	>=3	SBP	GO:0003676	F	nucleic acid binding	667	1632	8251	24075	4.8e-08	4.4e-05	LOC_Os04g06080	retrotransposon protein, putative, Ty3-gypsy subclass, expressed
D or OD	>=3	SBP	GO:0003676	F	nucleic acid binding	667	1632	8251	24075	4.8e-08	4.4e-05	LOC_Os01g11450	retrotransposon protein, putative, Ty1-copia subclass, expressed
D or OD	>=3	SBP	GO:0003676	F	nucleic acid binding	667	1632	8251	24075	4.8e-08	4.4e-05	LOC_Os06g38220	retrotransposon protein, putative, unclassified
D or OD	>=3	SBP	GO:0003676	F	nucleic acid binding	667	1632	8251	24075	4.8e-08	4.4e-05	LOC_Os03g33828	retrotransposon protein, putative, unclassified, expressed
D or OD	>=3	SBP	GO:0003676	F	nucleic acid binding	667	1632	8251	24075	4.8e-08	4.4e-05	LOC_Os03g33250	retrotransposon protein, putative, Ty3-gypsy subclass, expressed
D or OD	>=3	SBP	GO:0003676	F	nucleic acid binding	667	1632	8251	24075	4.8e-08	4.4e-05	LOC_Os07g25340	retrotransposon protein, putative, unclassified, expressed
D or OD	>=3	SBP	GO:0003676	F	nucleic acid binding	667	1632	8251	24075	4.8e-08	4.4e-05	LOC_Os01g12440	AP2 domain containing protein, expressed
D or OD	>=3	SBP	GO:0003676	F	nucleic acid binding	667	1632	8251	24075	4.8e-08	4.4e-05	LOC_Os07g24290	retrotransposon protein, putative, Ty3-gypsy subclass, expressed
D or OD	>=3	SBP	GO:0003676	F	nucleic acid binding	667	1632	8251	24075	4.8e-08	4.4e-05	LOC_Os07g23220	retrotransposon protein, putative, unclassified, expressed
D or OD	>=3	SBP	GO:0003676	F	nucleic acid binding	667	1632	8251	24075	4.8e-08	4.4e-05	LOC_Os07g24110	retrotransposon protein, putative, Ty1-copia subclass, expressed
D or OD	>=3	SBP	GO:0003676	F	nucleic acid binding	667	1632	8251	24075	4.8e-08	4.4e-05	LOC_Os01g59230	retrotransposon protein, putative, unclassified, expressed
D or OD	>=3	SBP	GO:0003676	F	nucleic acid binding	667	1632	8251	24075	4.8e-08	4.4e-05	LOC_Os07g24440	retrotransposon protein, putative, Ty3-gypsy subclass, expressed
D or OD	>=3	SBP	GO:0003676	F	nucleic acid binding	667	1632	8251	24075	4.8e-08	4.4e-05	LOC_Os12g32420	retrotransposon protein, putative, unclassified, expressed
D or OD	>=3	SBP	GO:0003676	F	nucleic acid binding	667	1632	8251	24075	4.8e-08	4.4e-05	LOC_Os07g33260	transposon protein, putative, unclassified, expressed
D or OD	>=3	SBP	GO:0003676	F	nucleic acid binding	667	1632	8251	24075	4.8e-08	4.4e-05	LOC_Os07g38750	AP2 domain containing protein, expressed
D or OD	>=3	SBP	GO:0003676	F	nucleic acid binding	667	1632	8251	24075	4.8e-08	4.4e-05	LOC_Os07g33130	retrotransposon protein, putative, unclassified, expressed
D or OD	>=3	SBP	GO:0003676	F	nucleic acid binding	667	1632	8251	24075	4.8e-08	4.4e-05	LOC_Os06g51070	no apical meristem protein, putative, expressed
D or OD	>=3	SBP	GO:0003676	F	nucleic acid binding	667	1632	8251	24075	4.8e-08	4.4e-05	LOC_Os03g26390	retrotransposon protein, putative, Ty3-gypsy subclass, expressed
D or OD	>=3	SBP	GO:0003676	F	nucleic acid binding	667	1632	8251	24075	4.8e-08	4.4e-05	LOC_Os02g45070	PINHEAD, putative, expressed
D or OD	>=3	SBP	GO:0003676	F	nucleic acid binding	667	1632	8251	24075	4.8e-08	4.4e-05	LOC_Os07g38450	retrotransposon protein, putative, unclassified, expressed
D or OD	>=3	SBP	GO:0003676	F	nucleic acid binding	667	1632	8251	24075	4.8e-08	4.4e-05	LOC_Os01g58690	endonuclease/exonuclease/phosphatase family domain containing protein, expressed
D or OD	>=3	SBP	GO:0003676	F	nucleic acid binding	667	1632	8251	24075	4.8e-08	4.4e-05	LOC_Os09g34010	expressed protein
D or OD	>=3	SBP	GO:0003676	F	nucleic acid binding	667	1632	8251	24075	4.8e-08	4.4e-05	LOC_Os04g05520	transposon protein, putative, unclassified, expressed
D or OD	>=3	SBP	GO:0003676	F	nucleic acid binding	667	1632	8251	24075	4.8e-08	4.4e-05	LOC_Os07g24590	retrotransposon protein, putative, unclassified, expressed
D or OD	>=3	SBP	GO:0003676	F	nucleic acid binding	667	1632	8251	24075	4.8e-08	4.4e-05	LOC_Os06g38980	polyadenylate-binding protein, putative, expressed
D or OD	>=3	SBP	GO:0003676	F	nucleic acid binding	667	1632	8251	24075	4.8e-08	4.4e-05	LOC_Os09g34070	RNA recognition motif containing protein, expressed
D or OD	>=3	SBP	GO:0003676	F	nucleic acid binding	667	1632	8251	24075	4.8e-08	4.4e-05	LOC_Os01g11200	transforming protein myb, putative, expressed
D or OD	>=3	SBP	GO:0003676	F	nucleic acid binding	667	1632	8251	24075	4.8e-08	4.4e-05	LOC_Os04g29500	retrotransposon protein, putative, unclassified
D or OD	>=3	SBP	GO:0003676	F	nucleic acid binding	667	1632	8251	24075	4.8e-08	4.4e-05	LOC_Os06g39920	retrotransposon protein, putative, unclassified, expressed
D or OD	>=3	SBP	GO:0003676	F	nucleic acid binding	667	1632	8251	24075	4.8e-08	4.4e-05	LOC_Os06g38820	retrotransposon protein, putative, Ty1-copia subclass, expressed
D or OD	>=3	SBP	GO:0003676	F	nucleic acid binding	667	1632	8251	24075	4.8e-08	4.4e-05	LOC_Os11g25280	retrotransposon protein, putative, unclassified
D or OD	>=3	SBP	GO:0003676	F	nucleic acid binding	667	1632	8251	24075	4.8e-08	4.4e-05	LOC_Os06g49940	retrotransposon protein, putative, unclassified, expressed
D or OD	>=3	SBP	GO:0003676	F	nucleic acid binding	667	1632	8251	24075	4.8e-08	4.4e-05	LOC_Os04g29130	retrotransposon protein, putative, unclassified
D or OD	>=3	SBP	GO:0003676	F	nucleic acid binding	667	1632	8251	24075	4.8e-08	4.4e-05	LOC_Os04g06144	retrotransposon protein, putative, Ty3-gypsy subclass, expressed
D or OD	>=3	SBP	GO:0003676	F	nucleic acid binding	667	1632	8251	24075	4.8e-08	4.4e-05	LOC_Os03g02500	retrotransposon protein, putative, Ty1-copia subclass, expressed
D or OD	>=3	SBP	GO:0003676	F	nucleic acid binding	667	1632	8251	24075	4.8e-08	4.4e-05	LOC_Os04g06220	retrotransposon protein, putative, Ty1-copia subclass, expressed
D or OD	>=3	SBP	GO:0003676	F	nucleic acid binding	667	1632	8251	24075	4.8e-08	4.4e-05	LOC_Os03g33850	retrotransposon protein, putative, Ty1-copia subclass
D or OD	>=3	SBP	GO:0003676	F	nucleic acid binding	667	1632	8251	24075	4.8e-08	4.4e-05	LOC_Os03g35700	retrotransposon protein, putative, Ty3-gypsy subclass
D or OD	>=3	SBP	GO:0003676	F	nucleic acid binding	667	1632	8251	24075	4.8e-08	4.4e-05	LOC_Os06g39190	retrotransposon protein, putative, unclassified, expressed
D or OD	>=3	SBP	GO:0003676	F	nucleic acid binding	667	1632	8251	24075	4.8e-08	4.4e-05	LOC_Os08g24560	retrotransposon protein, putative, Ty3-gypsy subclass, expressed
D or OD	>=3	SBP	GO:0003676	F	nucleic acid binding	667	1632	8251	24075	4.8e-08	4.4e-05	LOC_Os04g05890	retrotransposon protein, putative, unclassified, expressed
D or OD	>=3	SBP	GO:0003676	F	nucleic acid binding	667	1632	8251	24075	4.8e-08	4.4e-05	LOC_Os12g33450	retrotransposon protein, putative, Ty3-gypsy subclass, expressed
D or OD	>=3	SBP	GO:0003676	F	nucleic acid binding	667	1632	8251	24075	4.8e-08	4.4e-05	LOC_Os03g02240	AT-GTL1, putative, expressed
D or OD	>=3	SBP	GO:0003676	F	nucleic acid binding	667	1632	8251	24075	4.8e-08	4.4e-05	LOC_Os12g34140	retrotransposon protein, putative, unclassified, expressed
D or OD	>=3	SBP	GO:0003676	F	nucleic acid binding	667	1632	8251	24075	4.8e-08	4.4e-05	LOC_Os10g11090	retrotransposon protein, putative, unclassified, expressed
D or OD	>=3	SBP	GO:0003676	F	nucleic acid binding	667	1632	8251	24075	4.8e-08	4.4e-05	LOC_Os01g02530	retrotransposon protein, putative, unclassified, expressed
D or OD	>=3	SBP	GO:0003676	F	nucleic acid binding	667	1632	8251	24075	4.8e-08	4.4e-05	LOC_Os03g35670	retrotransposon protein, putative, unclassified
D or OD	>=3	SBP	GO:0003676	F	nucleic acid binding	667	1632	8251	24075	4.8e-08	4.4e-05	LOC_Os09g07420	retrotransposon protein, putative, unclassified, expressed
D or OD	>=3	SBP	GO:0003676	F	nucleic acid binding	667	1632	8251	24075	4.8e-08	4.4e-05	LOC_Os06g50270	retrotransposon protein, putative, Ty3-gypsy subclass, expressed
D or OD	>=3	SBP	GO:0003676	F	nucleic acid binding	667	1632	8251	24075	4.8e-08	4.4e-05	LOC_Os11g25210	retrotransposon protein, putative, unclassified, expressed
D or OD	>=3	SBP	GO:0003676	F	nucleic acid binding	667	1632	8251	24075	4.8e-08	4.4e-05	LOC_Os01g02380	retrotransposon protein, putative, Ty3-gypsy subclass, expressed
D or OD	>=3	SBP	GO:0003676	F	nucleic acid binding	667	1632	8251	24075	4.8e-08	4.4e-05	LOC_Os01g11510	OsMADS91 - MADS-box family gene with M-beta type-box, expressed
D or OD	>=3	SBP	GO:0003676	F	nucleic acid binding	667	1632	8251	24075	4.8e-08	4.4e-05	LOC_Os01g59510	chloroplast ribonuclease III domain protein, putative, expressed
D or OD	>=3	SBP	GO:0003676	F	nucleic acid binding	667	1632	8251	24075	4.8e-08	4.4e-05	LOC_Os01g42170	zinc knuckle family protein, expressed
D or OD	>=3	SBP	GO:0003676	F	nucleic acid binding	667	1632	8251	24075	4.8e-08	4.4e-05	LOC_Os06g50190	retrotransposon protein, putative, unclassified, expressed
D or OD	>=3	SBP	GO:0003676	F	nucleic acid binding	667	1632	8251	24075	4.8e-08	4.4e-05	LOC_Os06g40260	retrotransposon protein, putative, Ty3-gypsy subclass, expressed
D or OD	>=3	SBP	GO:0003676	F	nucleic acid binding	667	1632	8251	24075	4.8e-08	4.4e-05	LOC_Os04g06660	retrotransposon protein, putative, Ty3-gypsy subclass
D or OD	>=3	SBP	GO:0003676	F	nucleic acid binding	667	1632	8251	24075	4.8e-08	4.4e-05	LOC_Os03g35454	retrotransposon protein, putative, unclassified, expressed
D or OD	>=3	SBP	GO:0003676	F	nucleic acid binding	667	1632	8251	24075	4.8e-08	4.4e-05	LOC_Os07g22730	AP2 domain containing protein, expressed
D or OD	>=3	SBP	GO:0003676	F	nucleic acid binding	667	1632	8251	24075	4.8e-08	4.4e-05	LOC_Os03g26560	retrotransposon protein, putative, unclassified
D or OD	>=3	SBP	GO:0003676	F	nucleic acid binding	667	1632	8251	24075	4.8e-08	4.4e-05	LOC_Os04g03990	3-5 exonuclease domain-containing protein, putative, expressed
D or OD	>=3	SBP	GO:0003676	F	nucleic acid binding	667	1632	8251	24075	4.8e-08	4.4e-05	LOC_Os03g03210	retrotransposon protein, putative, Ty3-gypsy subclass, expressed
D or OD	>=3	SBP	GO:0003676	F	nucleic acid binding	667	1632	8251	24075	4.8e-08	4.4e-05	LOC_Os06g39990	retrotransposon protein, putative, unclassified, expressed
D or OD	>=3	SBP	GO:0003676	F	nucleic acid binding	667	1632	8251	24075	4.8e-08	4.4e-05	LOC_Os09g07060	retrotransposon protein, putative, unclassified, expressed
D or OD	>=3	SBP	GO:0003676	F	nucleic acid binding	667	1632	8251	24075	4.8e-08	4.4e-05	LOC_Os03g26760	retrotransposon protein, putative, Ty3-gypsy subclass, expressed
D or OD	>=3	SBP	GO:0003676	F	nucleic acid binding	667	1632	8251	24075	4.8e-08	4.4e-05	LOC_Os03g25890	retrotransposon protein, putative, unclassified, expressed
D or OD	>=3	SBP	GO:0003676	F	nucleic acid binding	667	1632	8251	24075	4.8e-08	4.4e-05	LOC_Os07g23830	retrotransposon protein, putative, unclassified, expressed
D or OD	>=3	SBP	GO:0003676	F	nucleic acid binding	667	1632	8251	24075	4.8e-08	4.4e-05	LOC_Os01g58710	retrotransposon protein, putative, Ty3-gypsy subclass, expressed
D or OD	>=3	SBP	GO:0003676	F	nucleic acid binding	667	1632	8251	24075	4.8e-08	4.4e-05	LOC_Os11g18430	retrotransposon protein, putative, Ty3-gypsy subclass
D or OD	>=3	SBP	GO:0003676	F	nucleic acid binding	667	1632	8251	24075	4.8e-08	4.4e-05	LOC_Os01g60260	KH domain containing protein, putative, expressed
D or OD	>=3	SBP	GO:0003676	F	nucleic acid binding	667	1632	8251	24075	4.8e-08	4.4e-05	LOC_Os07g24700	retrotransposon protein, putative, Ty3-gypsy subclass, expressed
D or OD	>=3	SBP	GO:0003676	F	nucleic acid binding	667	1632	8251	24075	4.8e-08	4.4e-05	LOC_Os02g44070	retrotransposon protein, putative, unclassified, expressed
D or OD	>=3	SBP	GO:0003676	F	nucleic acid binding	667	1632	8251	24075	4.8e-08	4.4e-05	LOC_Os01g23020	retrotransposon protein, putative, Ty3-gypsy subclass, expressed
D or OD	>=3	SBP	GO:0003676	F	nucleic acid binding	667	1632	8251	24075	4.8e-08	4.4e-05	LOC_Os12g15580	retrotransposon protein, putative, unclassified, expressed
D or OD	>=3	SBP	GO:0003676	F	nucleic acid binding	667	1632	8251	24075	4.8e-08	4.4e-05	LOC_Os08g24690	retrotransposon protein, putative, unclassified, expressed
D or OD	>=3	SBP	GO:0003676	F	nucleic acid binding	667	1632	8251	24075	4.8e-08	4.4e-05	LOC_Os01g11140	retrotransposon protein, putative, unclassified, expressed
D or OD	>=3	SBP	GO:0003676	F	nucleic acid binding	667	1632	8251	24075	4.8e-08	4.4e-05	LOC_Os07g24660	retrotransposon protein, putative, Ty3-gypsy subclass, expressed
D or OD	>=3	SBP	GO:0003676	F	nucleic acid binding	667	1632	8251	24075	4.8e-08	4.4e-05	LOC_Os07g22420	retrotransposon protein, putative, Ty3-gypsy subclass, expressed
D or OD	>=3	SBP	GO:0003676	F	nucleic acid binding	667	1632	8251	24075	4.8e-08	4.4e-05	LOC_Os03g26329	retrotransposon protein, putative, unclassified, expressed
D or OD	>=3	SBP	GO:0003676	F	nucleic acid binding	667	1632	8251	24075	4.8e-08	4.4e-05	LOC_Os03g24360	transposon protein, putative, unclassified, expressed
D or OD	>=3	SBP	GO:0003676	F	nucleic acid binding	667	1632	8251	24075	4.8e-08	4.4e-05	LOC_Os07g23110	poly synthetase 1, putative, expressed
D or OD	>=3	SBP	GO:0003676	F	nucleic acid binding	667	1632	8251	24075	4.8e-08	4.4e-05	LOC_Os03g03100	OsMADS50 - MADS-box family gene with MIKCc type-box, expressed
D or OD	>=3	SBP	GO:0003676	F	nucleic acid binding	667	1632	8251	24075	4.8e-08	4.4e-05	LOC_Os08g24990	retrotransposon protein, putative, Ty3-gypsy subclass, expressed
D or OD	>=3	SBP	GO:0003676	F	nucleic acid binding	667	1632	8251	24075	4.8e-08	4.4e-05	LOC_Os07g25014	chloroplast 50S ribosomal protein L23, putative
D or OD	>=3	SBP	GO:0003676	F	nucleic acid binding	667	1632	8251	24075	4.8e-08	4.4e-05	LOC_Os03g33172	retrotransposon protein, putative, unclassified, expressed
D or OD	>=3	SBP	GO:0003676	F	nucleic acid binding	667	1632	8251	24075	4.8e-08	4.4e-05	LOC_Os09g13530	zinc finger C-x8-C-x5-C-x3-H type family protein, expressed
D or OD	>=3	SBP	GO:0003676	F	nucleic acid binding	667	1632	8251	24075	4.8e-08	4.4e-05	LOC_Os03g03260	homeobox domain containing protein, expressed
D or OD	>=3	SBP	GO:0003676	F	nucleic acid binding	667	1632	8251	24075	4.8e-08	4.4e-05	LOC_Os08g24220	retrotransposon protein, putative, Ty3-gypsy subclass, expressed
D or OD	>=3	SBP	GO:0003676	F	nucleic acid binding	667	1632	8251	24075	4.8e-08	4.4e-05	LOC_Os07g24520	retrotransposon protein, putative, Ty3-gypsy subclass, expressed
D or OD	>=3	SBP	GO:0003676	F	nucleic acid binding	667	1632	8251	24075	4.8e-08	4.4e-05	LOC_Os07g24620	retrotransposon protein, putative, unclassified, expressed
D or OD	>=3	SBP	GO:0003676	F	nucleic acid binding	667	1632	8251	24075	4.8e-08	4.4e-05	LOC_Os01g23090	retrotransposon protein, putative, Ty1-copia subclass, expressed
D or OD	>=3	SBP	GO:0003676	F	nucleic acid binding	667	1632	8251	24075	4.8e-08	4.4e-05	LOC_Os02g44180	retrotransposon protein, putative, Ty3-gypsy subclass, expressed
D or OD	>=3	SBP	GO:0003676	F	nucleic acid binding	667	1632	8251	24075	4.8e-08	4.4e-05	LOC_Os07g32650	retrotransposon protein, putative, unclassified, expressed
D or OD	>=3	SBP	GO:0003676	F	nucleic acid binding	667	1632	8251	24075	4.8e-08	4.4e-05	LOC_Os03g33700	retrotransposon protein, putative, unclassified, expressed
D or OD	>=3	SBP	GO:0003676	F	nucleic acid binding	667	1632	8251	24075	4.8e-08	4.4e-05	LOC_Os03g33319	retrotransposon protein, putative, unclassified
D or OD	>=3	SBP	GO:0003676	F	nucleic acid binding	667	1632	8251	24075	4.8e-08	4.4e-05	LOC_Os07g24400	retrotransposon protein, putative, Ty3-gypsy subclass, expressed
D or OD	>=3	SBP	GO:0003676	F	nucleic acid binding	667	1632	8251	24075	4.8e-08	4.4e-05	LOC_Os07g23300	retrotransposon protein, putative, unclassified, expressed
D or OD	>=3	SBP	GO:0003676	F	nucleic acid binding	667	1632	8251	24075	4.8e-08	4.4e-05	LOC_Os04g06360	retrotransposon protein, putative, Ty3-gypsy subclass, expressed
D or OD	>=3	SBP	GO:0003676	F	nucleic acid binding	667	1632	8251	24075	4.8e-08	4.4e-05	LOC_Os08g26910	retrotransposon protein, putative, Ty3-gypsy subclass, expressed
D or OD	>=3	SBP	GO:0003676	F	nucleic acid binding	667	1632	8251	24075	4.8e-08	4.4e-05	LOC_Os04g06402	retrotransposon protein, putative, unclassified
D or OD	>=3	SBP	GO:0003676	F	nucleic acid binding	667	1632	8251	24075	4.8e-08	4.4e-05	LOC_Os08g24500	retrotransposon protein, putative, Ty3-gypsy subclass, expressed
D or OD	>=3	SBP	GO:0003676	F	nucleic acid binding	667	1632	8251	24075	4.8e-08	4.4e-05	LOC_Os07g22800	retrotransposon protein, putative, Ty1-copia subclass, expressed
D or OD	>=3	SBP	GO:0003676	F	nucleic acid binding	667	1632	8251	24075	4.8e-08	4.4e-05	LOC_Os06g50890	RNA recognition motif containing protein, expressed
D or OD	>=3	SBP	GO:0003676	F	nucleic acid binding	667	1632	8251	24075	4.8e-08	4.4e-05	LOC_Os09g07190	retrotransposon protein, putative, unclassified
D or OD	>=3	SBP	GO:0003676	F	nucleic acid binding	667	1632	8251	24075	4.8e-08	4.4e-05	LOC_Os04g29469	retrotransposon protein, putative, unclassified, expressed
D or OD	>=3	SBP	GO:0003676	F	nucleic acid binding	667	1632	8251	24075	4.8e-08	4.4e-05	LOC_Os07g25330	retrotransposon protein, putative, Ty3-gypsy subclass, expressed
D or OD	>=3	SBP	GO:0003676	F	nucleic acid binding	667	1632	8251	24075	4.8e-08	4.4e-05	LOC_Os07g25360	retrotransposon protein, putative, unclassified, expressed
D or OD	>=3	SBP	GO:0003676	F	nucleic acid binding	667	1632	8251	24075	4.8e-08	4.4e-05	LOC_Os07g24240	retrotransposon protein, putative, Ty3-gypsy subclass, expressed
D or OD	>=3	SBP	GO:0003676	F	nucleic acid binding	667	1632	8251	24075	4.8e-08	4.4e-05	LOC_Os03g33790	retrotransposon protein, putative, unclassified, expressed
D or OD	>=3	SBP	GO:0003676	F	nucleic acid binding	667	1632	8251	24075	4.8e-08	4.4e-05	LOC_Os02g45250	homeobox and START domains containing protein, putative, expressed
D or OD	>=3	SBP	GO:0003676	F	nucleic acid binding	667	1632	8251	24075	4.8e-08	4.4e-05	LOC_Os04g04880	retrotransposon protein, putative, Ty3-gypsy subclass, expressed
D or OD	>=3	SBP	GO:0003676	F	nucleic acid binding	667	1632	8251	24075	4.8e-08	4.4e-05	LOC_Os06g39310	retrotransposon protein, putative, unclassified
D or OD	>=3	SBP	GO:0003676	F	nucleic acid binding	667	1632	8251	24075	4.8e-08	4.4e-05	LOC_Os04g06310	retrotransposon protein, putative, unclassified, expressed
D or OD	>=3	SBP	GO:0003676	F	nucleic acid binding	667	1632	8251	24075	4.8e-08	4.4e-05	LOC_Os03g34140	retrotransposon protein, putative, Ty1-copia subclass
D or OD	>=3	SBP	GO:0003676	F	nucleic acid binding	667	1632	8251	24075	4.8e-08	4.4e-05	LOC_Os06g49270	retrotransposon protein, putative, Ty1-copia subclass, expressed
D or OD	>=3	SBP	GO:0003676	F	nucleic acid binding	667	1632	8251	24075	4.8e-08	4.4e-05	LOC_Os03g02160	zinc finger C-x8-C-x5-C-x3-H type family protein, expressed
D or OD	>=3	SBP	GO:0003676	F	nucleic acid binding	667	1632	8251	24075	4.8e-08	4.4e-05	LOC_Os06g38920	transposon protein, putative, CACTA, En/Spm sub-class, expressed
D or OD	>=3	SBP	GO:0003676	F	nucleic acid binding	667	1632	8251	24075	4.8e-08	4.4e-05	LOC_Os06g37935	retrotransposon protein, putative, Ty3-gypsy subclass
D or OD	>=3	SBP	GO:0003676	F	nucleic acid binding	667	1632	8251	24075	4.8e-08	4.4e-05	LOC_Os11g25070	retrotransposon protein, putative, unclassified, expressed
D or OD	>=3	SBP	GO:0003676	F	nucleic acid binding	667	1632	8251	24075	4.8e-08	4.4e-05	LOC_Os06g38609	retrotransposon protein, putative, unclassified, expressed
D or OD	>=3	SBP	GO:0003676	F	nucleic acid binding	667	1632	8251	24075	4.8e-08	4.4e-05	LOC_Os04g29380	retrotransposon protein, putative, unclassified, expressed
D or OD	>=3	SBP	GO:0003676	F	nucleic acid binding	667	1632	8251	24075	4.8e-08	4.4e-05	LOC_Os12g33640	retrotransposon, putative, centromere-specific, expressed
D or OD	>=3	SBP	GO:0003676	F	nucleic acid binding	667	1632	8251	24075	4.8e-08	4.4e-05	LOC_Os06g50310	E2F-related protein, putative, expressed
D or OD	>=3	SBP	GO:0003676	F	nucleic acid binding	667	1632	8251	24075	4.8e-08	4.4e-05	LOC_Os03g02800	no apical meristem protein, putative, expressed
D or OD	>=3	SBP	GO:0003676	F	nucleic acid binding	667	1632	8251	24075	4.8e-08	4.4e-05	LOC_Os06g38400	retrotransposon protein, putative, Ty1-copia subclass, expressed
D or OD	>=3	SBP	GO:0003676	F	nucleic acid binding	667	1632	8251	24075	4.8e-08	4.4e-05	LOC_Os08g09840	WRKY117, expressed
D or OD	>=3	SBP	GO:0003676	F	nucleic acid binding	667	1632	8251	24075	4.8e-08	4.4e-05	LOC_Os03g02970	Dicer, putative, expressed
D or OD	>=3	SBP	GO:0003676	F	nucleic acid binding	667	1632	8251	24075	4.8e-08	4.4e-05	LOC_Os04g29140	retrotransposon protein, putative, unclassified
D or OD	>=3	SBP	GO:0003676	F	nucleic acid binding	667	1632	8251	24075	4.8e-08	4.4e-05	LOC_Os07g25200	retrotransposon protein, putative, Ty3-gypsy subclass, expressed
D or OD	>=3	SBP	GO:0003676	F	nucleic acid binding	667	1632	8251	24075	4.8e-08	4.4e-05	LOC_Os03g27140	retrotransposon protein, putative, unclassified, expressed
D or OD	>=3	SBP	GO:0003676	F	nucleic acid binding	667	1632	8251	24075	4.8e-08	4.4e-05	LOC_Os03g15140	retrotransposon protein, putative, unclassified, expressed
D or OD	>=3	SBP	GO:0003676	F	nucleic acid binding	667	1632	8251	24075	4.8e-08	4.4e-05	LOC_Os04g53040	retrotransposon protein, putative, unclassified, expressed
D or OD	>=3	SBP	GO:0003676	F	nucleic acid binding	667	1632	8251	24075	4.8e-08	4.4e-05	LOC_Os06g41790	RNA recognition motif containing protein, putative, expressed
D or OD	>=3	SBP	GO:0003676	F	nucleic acid binding	667	1632	8251	24075	4.8e-08	4.4e-05	LOC_Os04g05170	retrotransposon protein, putative, Ty3-gypsy subclass, expressed
D or OD	>=3	SBP	GO:0003676	F	nucleic acid binding	667	1632	8251	24075	4.8e-08	4.4e-05	LOC_Os07g23840	retrotransposon protein, putative, unclassified, expressed
D or OD	>=3	SBP	GO:0003676	F	nucleic acid binding	667	1632	8251	24075	4.8e-08	4.4e-05	LOC_Os02g44410	retrotransposon protein, putative, unclassified, expressed
D or OD	>=3	SBP	GO:0003676	F	nucleic acid binding	667	1632	8251	24075	4.8e-08	4.4e-05	LOC_Os07g17630	retrotransposon protein, putative, Ty3-gypsy subclass, expressed
D or OD	>=3	SBP	GO:0003676	F	nucleic acid binding	667	1632	8251	24075	4.8e-08	4.4e-05	LOC_Os04g05370	retrotransposon protein, putative, unclassified, expressed
D or OD	>=3	SBP	GO:0003676	F	nucleic acid binding	667	1632	8251	24075	4.8e-08	4.4e-05	LOC_Os12g15850	retrotransposon protein, putative, unclassified
D or OD	>=3	SBP	GO:0003676	F	nucleic acid binding	667	1632	8251	24075	4.8e-08	4.4e-05	LOC_Os04g53200	exonuclease, putative, expressed
D or OD	>=3	SBP	GO:0003676	F	nucleic acid binding	667	1632	8251	24075	4.8e-08	4.4e-05	LOC_Os03g35560	retrotransposon protein, putative, Ty1-copia subclass, expressed
D or OD	>=3	SBP	GO:0003676	F	nucleic acid binding	667	1632	8251	24075	4.8e-08	4.4e-05	LOC_Os03g39190	expressed protein
D or OD	>=3	SBP	GO:0003676	F	nucleic acid binding	667	1632	8251	24075	4.8e-08	4.4e-05	LOC_Os07g24990	retrotransposon protein, putative, Ty3-gypsy subclass, expressed
D or OD	>=3	SBP	GO:0003676	F	nucleic acid binding	667	1632	8251	24075	4.8e-08	4.4e-05	LOC_Os11g18250	retrotransposon protein, putative, Ty3-gypsy subclass
D or OD	>=3	SBP	GO:0003676	F	nucleic acid binding	667	1632	8251	24075	4.8e-08	4.4e-05	LOC_Os03g02310	RNA binding protein, putative, expressed
D or OD	>=3	SBP	GO:0003676	F	nucleic acid binding	667	1632	8251	24075	4.8e-08	4.4e-05	LOC_Os12g33260	retrotransposon protein, putative, Ty3-gypsy subclass, expressed
D or OD	>=3	SBP	GO:0003676	F	nucleic acid binding	667	1632	8251	24075	4.8e-08	4.4e-05	LOC_Os03g03140	RNA recognition motif containing protein, putative, expressed
D or OD	>=3	SBP	GO:0003676	F	nucleic acid binding	667	1632	8251	24075	4.8e-08	4.4e-05	LOC_Os06g50360	pseudouridine synthase family protein, putative, expressed
D or OD	>=3	SBP	GO:0003676	F	nucleic acid binding	667	1632	8251	24075	4.8e-08	4.4e-05	LOC_Os03g03070	transcription factor, putative, expressed
D or OD	>=3	SBP	GO:0003676	F	nucleic acid binding	667	1632	8251	24075	4.8e-08	4.4e-05	LOC_Os07g38320	retrotransposon protein, putative, Ty3-gypsy subclass
D or OD	>=3	SBP	GO:0003676	F	nucleic acid binding	667	1632	8251	24075	4.8e-08	4.4e-05	LOC_Os09g13575	expressed protein
D or OD	>=3	SBP	GO:0003676	F	nucleic acid binding	667	1632	8251	24075	4.8e-08	4.4e-05	LOC_Os07g25110	retrotransposon protein, putative, Ty3-gypsy subclass, expressed
D or OD	>=3	SBP	GO:0003676	F	nucleic acid binding	667	1632	8251	24075	4.8e-08	4.4e-05	LOC_Os04g05730	retrotransposon protein, putative, Ty3-gypsy subclass, expressed
D or OD	>=3	SBP	GO:0003676	F	nucleic acid binding	667	1632	8251	24075	4.8e-08	4.4e-05	LOC_Os04g04510	retrotransposon protein, putative, Ty3-gypsy subclass, expressed
D or OD	>=3	SBP	GO:0003676	F	nucleic acid binding	667	1632	8251	24075	4.8e-08	4.4e-05	LOC_Os03g15660	AP2 domain containing protein, expressed
D or OD	>=3	SBP	GO:0003676	F	nucleic acid binding	667	1632	8251	24075	4.8e-08	4.4e-05	LOC_Os08g24970	retrotransposon protein, putative, unclassified
D or OD	>=3	SBP	GO:0003676	F	nucleic acid binding	667	1632	8251	24075	4.8e-08	4.4e-05	LOC_Os10g11702	retrotransposon protein, putative, Ty3-gypsy subclass, expressed
D or OD	>=3	SBP	GO:0003676	F	nucleic acid binding	667	1632	8251	24075	4.8e-08	4.4e-05	LOC_Os08g09350	gar2, putative, expressed
D or OD	>=3	SBP	GO:0003676	F	nucleic acid binding	667	1632	8251	24075	4.8e-08	4.4e-05	LOC_Os03g34260	retrotransposon protein, putative, unclassified, expressed
D or OD	>=3	SBP	GO:0003676	F	nucleic acid binding	667	1632	8251	24075	4.8e-08	4.4e-05	LOC_Os07g23020	retrotransposon protein, putative, Ty3-gypsy subclass
D or OD	>=3	SBP	GO:0003676	F	nucleic acid binding	667	1632	8251	24075	4.8e-08	4.4e-05	LOC_Os07g24750	retrotransposon protein, putative, Ty3-gypsy subclass, expressed
D or OD	>=3	SBP	GO:0003676	F	nucleic acid binding	667	1632	8251	24075	4.8e-08	4.4e-05	LOC_Os02g44124	retrotransposon protein, putative, unclassified, expressed
D or OD	>=3	SBP	GO:0003676	F	nucleic acid binding	667	1632	8251	24075	4.8e-08	4.4e-05	LOC_Os07g24690	retrotransposon protein, putative, unclassified, expressed
D or OD	>=3	SBP	GO:0003676	F	nucleic acid binding	667	1632	8251	24075	4.8e-08	4.4e-05	LOC_Os03g27310	histone H3, putative, expressed
D or OD	>=3	SBP	GO:0003676	F	nucleic acid binding	667	1632	8251	24075	4.8e-08	4.4e-05	LOC_Os06g38030	retrotransposon protein, putative, Ty3-gypsy subclass, expressed
D or OD	>=3	SBP	GO:0003676	F	nucleic acid binding	667	1632	8251	24075	4.8e-08	4.4e-05	LOC_Os04g06130	retrotransposon protein, putative, Ty3-gypsy subclass, expressed
D or OD	>=3	SBP	GO:0003676	F	nucleic acid binding	667	1632	8251	24075	4.8e-08	4.4e-05	LOC_Os03g27090	MYB family transcription factor, putative, expressed
D or OD	>=3	SBP	GO:0003676	F	nucleic acid binding	667	1632	8251	24075	4.8e-08	4.4e-05	LOC_Os03g33100	retrotransposon protein, putative, unclassified, expressed
D or OD	>=3	SBP	GO:0003676	F	nucleic acid binding	667	1632	8251	24075	4.8e-08	4.4e-05	LOC_Os12g15650	retrotransposon protein, putative, Ty3-gypsy subclass, expressed
D or OD	>=3	SBP	GO:0003676	F	nucleic acid binding	667	1632	8251	24075	4.8e-08	4.4e-05	LOC_Os01g11920	retrotransposon protein, putative, unclassified, expressed
D or OD	>=3	SBP	GO:0003676	F	nucleic acid binding	667	1632	8251	24075	4.8e-08	4.4e-05	LOC_Os06g47810	retrotransposon protein, putative, Ty1-copia subclass, expressed
D or OD	>=3	SBP	GO:0003676	F	nucleic acid binding	667	1632	8251	24075	4.8e-08	4.4e-05	LOC_Os03g33530	retrotransposon protein, putative, unclassified, expressed
D or OD	>=3	SBP	GO:0003676	F	nucleic acid binding	667	1632	8251	24075	4.8e-08	4.4e-05	LOC_Os08g29500	histone-like transcription factor and archaeal histone, putative, expressed
D or OD	>=3	SBP	GO:0003676	F	nucleic acid binding	667	1632	8251	24075	4.8e-08	4.4e-05	LOC_Os08g24270	retrotransposon protein, putative, Ty3-gypsy subclass, expressed
D or OD	>=3	SBP	GO:0003676	F	nucleic acid binding	667	1632	8251	24075	4.8e-08	4.4e-05	LOC_Os07g25370	myb-like DNA-binding domain containing protein, expressed
D or OD	>=3	SBP	GO:0003676	F	nucleic acid binding	667	1632	8251	24075	4.8e-08	4.4e-05	LOC_Os03g02420	KH domain containing protein, putative, expressed
D or OD	>=3	SBP	GO:0003676	F	nucleic acid binding	667	1632	8251	24075	4.8e-08	4.4e-05	LOC_Os03g34040	ribosomal protein, putative, expressed
D or OD	>=3	SBP	GO:0003676	F	nucleic acid binding	667	1632	8251	24075	4.8e-08	4.4e-05	LOC_Os04g05810	retrotransposon protein, putative, unclassified
D or OD	>=3	SBP	GO:0003676	F	nucleic acid binding	667	1632	8251	24075	4.8e-08	4.4e-05	LOC_Os04g04574	retrotransposon protein, putative, Ty3-gypsy subclass, expressed
D or OD	>=3	SBP	GO:0003676	F	nucleic acid binding	667	1632	8251	24075	4.8e-08	4.4e-05	LOC_Os01g59220	retrotransposon protein, putative, unclassified, expressed
D or OD	>=3	SBP	GO:0003676	F	nucleic acid binding	667	1632	8251	24075	4.8e-08	4.4e-05	LOC_Os04g05200	retrotransposon protein, putative, Ty3-gypsy subclass, expressed
D or OD	>=3	SBP	GO:0003676	F	nucleic acid binding	667	1632	8251	24075	4.8e-08	4.4e-05	LOC_Os06g38420	retrotransposon protein, putative, Ty3-gypsy subclass, expressed
D or OD	>=3	SBP	GO:0003676	F	nucleic acid binding	667	1632	8251	24075	4.8e-08	4.4e-05	LOC_Os04g06450	retrotransposon protein, putative, Ty3-gypsy subclass, expressed
D or OD	>=3	SBP	GO:0003676	F	nucleic acid binding	667	1632	8251	24075	4.8e-08	4.4e-05	LOC_Os07g23070	retrotransposon protein, putative, Ty3-gypsy subclass, expressed
D or OD	>=3	SBP	GO:0003676	F	nucleic acid binding	667	1632	8251	24075	4.8e-08	4.4e-05	LOC_Os10g22230	retrotransposon protein, putative, unclassified, expressed
D or OD	>=3	SBP	GO:0003676	F	nucleic acid binding	667	1632	8251	24075	4.8e-08	4.4e-05	LOC_Os08g31810	RNA recognition motif containing protein, putative, expressed
D or OD	>=3	SBP	GO:0003676	F	nucleic acid binding	667	1632	8251	24075	4.8e-08	4.4e-05	LOC_Os05g24750	retrotransposon protein, putative, Ty1-copia subclass, expressed
D or OD	>=3	SBP	GO:0003676	F	nucleic acid binding	667	1632	8251	24075	4.8e-08	4.4e-05	LOC_Os03g26750	retrotransposon protein, putative, Ty3-gypsy subclass, expressed
D or OD	>=3	SBP	GO:0003676	F	nucleic acid binding	667	1632	8251	24075	4.8e-08	4.4e-05	LOC_Os02g44460	retrotransposon protein, putative, unclassified, expressed
D or OD	>=3	SBP	GO:0003676	F	nucleic acid binding	667	1632	8251	24075	4.8e-08	4.4e-05	LOC_Os06g50600	bZIP transcription factor domain containing protein, expressed
D or OD	>=3	SBP	GO:0003676	F	nucleic acid binding	667	1632	8251	24075	4.8e-08	4.4e-05	LOC_Os04g41910	RNA recognition motif containing protein, putative, expressed
D or OD	>=3	SBP	GO:0003676	F	nucleic acid binding	667	1632	8251	24075	4.8e-08	4.4e-05	LOC_Os06g50210	expressed protein
D or OD	>=3	SBP	GO:0003676	F	nucleic acid binding	667	1632	8251	24075	4.8e-08	4.4e-05	LOC_Os09g31390	transcription factor, putative, expressed
D or OD	>=3	SBP	GO:0003676	F	nucleic acid binding	667	1632	8251	24075	4.8e-08	4.4e-05	LOC_Os10g22010	retrotransposon protein, putative, unclassified, expressed
D or OD	>=3	SBP	GO:0003676	F	nucleic acid binding	667	1632	8251	24075	4.8e-08	4.4e-05	LOC_Os06g49950	retrotransposon protein, putative, unclassified, expressed
D or OD	>=3	SBP	GO:0003676	F	nucleic acid binding	667	1632	8251	24075	4.8e-08	4.4e-05	LOC_Os03g32860	retrotransposon protein, putative, unclassified, expressed
D or OD	>=3	SBP	GO:0003676	F	nucleic acid binding	667	1632	8251	24075	4.8e-08	4.4e-05	LOC_Os03g33960	retrotransposon protein, putative, unclassified
D or OD	>=3	SBP	GO:0003676	F	nucleic acid binding	667	1632	8251	24075	4.8e-08	4.4e-05	LOC_Os03g39450	retrotransposon protein, putative, Ty3-gypsy subclass, expressed
D or OD	>=3	SBP	GO:0003676	F	nucleic acid binding	667	1632	8251	24075	4.8e-08	4.4e-05	LOC_Os08g24410	retrotransposon protein, putative, unclassified, expressed
D or OD	>=3	SBP	GO:0003676	F	nucleic acid binding	667	1632	8251	24075	4.8e-08	4.4e-05	LOC_Os06g39180	retrotransposon protein, putative, unclassified, expressed
D or OD	>=3	SBP	GO:0003676	F	nucleic acid binding	667	1632	8251	24075	4.8e-08	4.4e-05	LOC_Os03g35740	retrotransposon protein, putative, Ty3-gypsy subclass, expressed
D or OD	>=3	SBP	GO:0003676	F	nucleic acid binding	667	1632	8251	24075	4.8e-08	4.4e-05	LOC_Os03g15620	retrotransposon protein, putative, unclassified, expressed
D or OD	>=3	SBP	GO:0003676	F	nucleic acid binding	667	1632	8251	24075	4.8e-08	4.4e-05	LOC_Os04g04850	retrotransposon protein, putative, Ty3-gypsy subclass
D or OD	>=3	SBP	GO:0003676	F	nucleic acid binding	667	1632	8251	24075	4.8e-08	4.4e-05	LOC_Os04g05330	retrotransposon protein, putative, unclassified, expressed
D or OD	>=3	SBP	GO:0003676	F	nucleic acid binding	667	1632	8251	24075	4.8e-08	4.4e-05	LOC_Os04g29424	retrotransposon protein, putative, LINE subclass, expressed
D or OD	>=3	SBP	GO:0003676	F	nucleic acid binding	667	1632	8251	24075	4.8e-08	4.4e-05	LOC_Os06g43090	MYB transcription factor TaMYB1, putative, expressed
D or OD	>=3	SBP	GO:0003676	F	nucleic acid binding	667	1632	8251	24075	4.8e-08	4.4e-05	LOC_Os01g23550	retrotransposon protein, putative, unclassified, expressed
D or OD	>=3	SBP	GO:0003676	F	nucleic acid binding	667	1632	8251	24075	4.8e-08	4.4e-05	LOC_Os06g40270	retrotransposon protein, putative, unclassified
D or OD	>=3	SBP	GO:0003676	F	nucleic acid binding	667	1632	8251	24075	4.8e-08	4.4e-05	LOC_Os12g15870	retrotransposon protein, putative, unclassified, expressed
D or OD	>=3	SBP	GO:0003676	F	nucleic acid binding	667	1632	8251	24075	4.8e-08	4.4e-05	LOC_Os03g33650	AGO7, putative, expressed
D or OD	>=3	SBP	GO:0003676	F	nucleic acid binding	667	1632	8251	24075	4.8e-08	4.4e-05	LOC_Os12g33956	maturase, putative, expressed
D or OD	>=3	SBP	GO:0003676	F	nucleic acid binding	667	1632	8251	24075	4.8e-08	4.4e-05	LOC_Os06g39160	retrotransposon protein, putative, unclassified, expressed
D or OD	>=3	SBP	GO:0003676	F	nucleic acid binding	667	1632	8251	24075	4.8e-08	4.4e-05	LOC_Os04g32960	TUDOR protein with multiple SNc domains, putative, expressed
D or OD	>=3	SBP	GO:0003676	F	nucleic acid binding	667	1632	8251	24075	4.8e-08	4.4e-05	LOC_Os04g29350	retrotransposon protein, putative, unclassified, expressed
D or OD	>=3	SBP	GO:0003676	F	nucleic acid binding	667	1632	8251	24075	4.8e-08	4.4e-05	LOC_Os03g26570	retrotransposon protein, putative, unclassified, expressed
D or OD	>=3	SBP	GO:0003676	F	nucleic acid binding	667	1632	8251	24075	4.8e-08	4.4e-05	LOC_Os07g25090	retrotransposon protein, putative, Ty3-gypsy subclass, expressed
D or OD	>=3	SBP	GO:0003676	F	nucleic acid binding	667	1632	8251	24075	4.8e-08	4.4e-05	LOC_Os03g39250	retrotransposon protein, putative, Ty3-gypsy subclass, expressed
D or OD	>=3	SBP	GO:0003676	F	nucleic acid binding	667	1632	8251	24075	4.8e-08	4.4e-05	LOC_Os02g45200	dof zinc finger domain containing protein, putative, expressed
D or OD	>=3	SBP	GO:0003676	F	nucleic acid binding	667	1632	8251	24075	4.8e-08	4.4e-05	LOC_Os07g25150	myb-related protein 306, putative, expressed
D or OD	>=3	SBP	GO:0003676	F	nucleic acid binding	667	1632	8251	24075	4.8e-08	4.4e-05	LOC_Os06g06970	AP2 domain containing protein, expressed
D or OD	>=3	SBP	GO:0003676	F	nucleic acid binding	667	1632	8251	24075	4.8e-08	4.4e-05	LOC_Os09g34980	zinc knuckle family protein, expressed
D or OD	>=3	SBP	GO:0003676	F	nucleic acid binding	667	1632	8251	24075	4.8e-08	4.4e-05	LOC_Os03g02350	transposon protein, putative, unclassified, expressed
D or OD	>=3	SBP	GO:0003676	F	nucleic acid binding	667	1632	8251	24075	4.8e-08	4.4e-05	LOC_Os04g04550	retrotransposon protein, putative, Ty3-gypsy subclass, expressed
D or OD	>=3	SBP	GO:0003676	F	nucleic acid binding	667	1632	8251	24075	4.8e-08	4.4e-05	LOC_Os12g15570	retrotransposon protein, putative, unclassified, expressed
D or OD	>=3	SBP	GO:0003676	F	nucleic acid binding	667	1632	8251	24075	4.8e-08	4.4e-05	LOC_Os04g06120	retrotransposon protein, putative, Ty3-gypsy subclass, expressed
D or OD	>=3	SBP	GO:0003676	F	nucleic acid binding	667	1632	8251	24075	4.8e-08	4.4e-05	LOC_Os04g05670	retrotransposon protein, putative, Ty3-gypsy subclass, expressed
D or OD	>=3	SBP	GO:0003676	F	nucleic acid binding	667	1632	8251	24075	4.8e-08	4.4e-05	LOC_Os06g39640	PINHEAD, putative, expressed
D or OD	>=3	SBP	GO:0003676	F	nucleic acid binding	667	1632	8251	24075	4.8e-08	4.4e-05	LOC_Os07g25390	DRD1, putative, expressed
D or OD	>=3	SBP	GO:0003676	F	nucleic acid binding	667	1632	8251	24075	4.8e-08	4.4e-05	LOC_Os04g05140	retrotransposon protein, putative, unclassified
D or OD	>=3	SBP	GO:0003676	F	nucleic acid binding	667	1632	8251	24075	4.8e-08	4.4e-05	LOC_Os12g32800	retrotransposon protein, putative, Ty3-gypsy subclass, expressed
D or OD	>=3	SBP	GO:0003676	F	nucleic acid binding	667	1632	8251	24075	4.8e-08	4.4e-05	LOC_Os12g34128	mitochondrial 60S ribosomal protein L16, putative, expressed
D or OD	>=3	SBP	GO:0003676	F	nucleic acid binding	667	1632	8251	24075	4.8e-08	4.4e-05	LOC_Os12g34124	mitochondrial ribosomal protein S3, putative, expressed
D or OD	>=3	SBP	GO:0003676	F	nucleic acid binding	667	1632	8251	24075	4.8e-08	4.4e-05	LOC_Os04g04820	retrotransposon protein, putative, unclassified, expressed
D or OD	>=3	SBP	GO:0003676	F	nucleic acid binding	667	1632	8251	24075	4.8e-08	4.4e-05	LOC_Os08g29420	retrotransposon protein, putative, Ty3-gypsy subclass, expressed
D or OD	>=3	SBP	GO:0003676	F	nucleic acid binding	667	1632	8251	24075	4.8e-08	4.4e-05	LOC_Os11g18420	retrotransposon protein, putative, Ty3-gypsy subclass
D or OD	>=3	SBP	GO:0003676	F	nucleic acid binding	667	1632	8251	24075	4.8e-08	4.4e-05	LOC_Os06g40150	AP2 domain containing protein, expressed
D or OD	>=3	SBP	GO:0003676	F	nucleic acid binding	667	1632	8251	24075	4.8e-08	4.4e-05	LOC_Os04g06480	retrotransposon protein, putative, unclassified
D or OD	>=3	SBP	GO:0003676	F	nucleic acid binding	667	1632	8251	24075	4.8e-08	4.4e-05	LOC_Os10g11990	retrotransposon protein, putative, Ty1-copia subclass, expressed
D or OD	>=3	SBP	GO:0003676	F	nucleic acid binding	667	1632	8251	24075	4.8e-08	4.4e-05	LOC_Os05g01240	AML1, putative, expressed
D or OD	>=3	SBP	GO:0003676	F	nucleic acid binding	667	1632	8251	24075	4.8e-08	4.4e-05	LOC_Os07g22550	retrotransposon protein, putative, Ty3-gypsy subclass, expressed
D or OD	>=3	SBP	GO:0003676	F	nucleic acid binding	667	1632	8251	24075	4.8e-08	4.4e-05	LOC_Os12g34510	Core histone H2A/H2B/H3/H4 domain containing protein, putative, expressed
D or OD	>=3	SBP	GO:0003676	F	nucleic acid binding	667	1632	8251	24075	4.8e-08	4.4e-05	LOC_Os12g31630	expressed protein
D or OD	>=3	SBP	GO:0003676	F	nucleic acid binding	667	1632	8251	24075	4.8e-08	4.4e-05	LOC_Os07g22410	retrotransposon protein, putative, Ty3-gypsy subclass, expressed
D or OD	>=3	SBP	GO:0003676	F	nucleic acid binding	667	1632	8251	24075	4.8e-08	4.4e-05	LOC_Os06g41770	bZIP transcription factor domain containing protein, expressed
D or OD	>=3	SBP	GO:0003676	F	nucleic acid binding	667	1632	8251	24075	4.8e-08	4.4e-05	LOC_Os12g33700	retrotransposon protein, putative, Ty3-gypsy subclass, expressed
D or OD	>=3	SBP	GO:0003676	F	nucleic acid binding	667	1632	8251	24075	4.8e-08	4.4e-05	LOC_Os01g68430	transposon protein, putative, unclassified
D or OD	>=3	SBP	GO:0003676	F	nucleic acid binding	667	1632	8251	24075	4.8e-08	4.4e-05	LOC_Os03g33140	retrotransposon protein, putative, Ty3-gypsy subclass, expressed
D or OD	>=3	SBP	GO:0003676	F	nucleic acid binding	667	1632	8251	24075	4.8e-08	4.4e-05	LOC_Os01g59140	DNA-directed RNA polymerases I, II, and III subunit RPABC1, putative, expressed
D or OD	>=3	SBP	GO:0003676	F	nucleic acid binding	667	1632	8251	24075	4.8e-08	4.4e-05	LOC_Os11g24930	retrotransposon protein, putative, Ty3-gypsy subclass, expressed
D or OD	>=3	SBP	GO:0003676	F	nucleic acid binding	667	1632	8251	24075	4.8e-08	4.4e-05	LOC_Os10g34860	transposon protein, putative, unclassified, expressed
D or OD	>=3	SBP	GO:0003676	F	nucleic acid binding	667	1632	8251	24075	4.8e-08	4.4e-05	LOC_Os01g58830	transposon protein, putative, unclassified, expressed
D or OD	>=3	SBP	GO:0003676	F	nucleic acid binding	667	1632	8251	24075	4.8e-08	4.4e-05	LOC_Os07g25024	chloroplast 30S ribosomal protein S19, putative
D or OD	>=3	SBP	GO:0003676	F	nucleic acid binding	667	1632	8251	24075	4.8e-08	4.4e-05	LOC_Os08g24230	retrotransposon protein, putative, unclassified, expressed
D or OD	>=3	SBP	GO:0003676	F	nucleic acid binding	667	1632	8251	24075	4.8e-08	4.4e-05	LOC_Os08g26920	retrotransposon protein, putative, Ty3-gypsy subclass, expressed
D or OD	>=3	SBP	GO:0003676	F	nucleic acid binding	667	1632	8251	24075	4.8e-08	4.4e-05	LOC_Os06g49140	ribosomal RNA large subunit methyltransferase J, putative, expressed
D or OD	>=3	SBP	GO:0003676	F	nucleic acid binding	667	1632	8251	24075	4.8e-08	4.4e-05	LOC_Os01g42590	retrotransposon protein, putative, unclassified, expressed
D or OD	>=3	SBP	GO:0003676	F	nucleic acid binding	667	1632	8251	24075	4.8e-08	4.4e-05	LOC_Os01g23410	transposon protein, putative, unclassified, expressed
D or OD	>=3	SBP	GO:0003676	F	nucleic acid binding	667	1632	8251	24075	4.8e-08	4.4e-05	LOC_Os06g38540	transposon protein, putative, unclassified
D or OD	>=3	SBP	GO:0003676	F	nucleic acid binding	667	1632	8251	24075	4.8e-08	4.4e-05	LOC_Os08g26970	retrotransposon protein, putative, unclassified, expressed
D or OD	>=3	SBP	GO:0003676	F	nucleic acid binding	667	1632	8251	24075	4.8e-08	4.4e-05	LOC_Os09g19610	retrotransposon protein, putative, unclassified, expressed
D or OD	>=3	SBP	GO:0003676	F	nucleic acid binding	667	1632	8251	24075	4.8e-08	4.4e-05	LOC_Os08g09160	retrotransposon protein, putative, unclassified, expressed
D or OD	>=3	SBP	GO:0003676	F	nucleic acid binding	667	1632	8251	24075	4.8e-08	4.4e-05	LOC_Os03g33240	retrotransposon protein, putative, unclassified, expressed
D or OD	>=3	SBP	GO:0003676	F	nucleic acid binding	667	1632	8251	24075	4.8e-08	4.4e-05	LOC_Os06g49910	retrotransposon protein, putative, unclassified
D or OD	>=3	SBP	GO:0003676	F	nucleic acid binding	667	1632	8251	24075	4.8e-08	4.4e-05	LOC_Os04g06390	retrotransposon protein, putative, Ty3-gypsy subclass
D or OD	>=3	SBP	GO:0003676	F	nucleic acid binding	667	1632	8251	24075	4.8e-08	4.4e-05	LOC_Os10g12010	retrotransposon protein, putative, unclassified, expressed
D or OD	>=3	SBP	GO:0003676	F	nucleic acid binding	667	1632	8251	24075	4.8e-08	4.4e-05	LOC_Os05g24850	retrotransposon protein, putative, Ty3-gypsy subclass
D or OD	>=3	SBP	GO:0003676	F	nucleic acid binding	667	1632	8251	24075	4.8e-08	4.4e-05	LOC_Os04g05240	retrotransposon protein, putative, unclassified
D or OD	>=3	SBP	GO:0003676	F	nucleic acid binding	667	1632	8251	24075	4.8e-08	4.4e-05	LOC_Os10g11690	retrotransposon protein, putative, Ty3-gypsy subclass, expressed
D or OD	>=3	SBP	GO:0003676	F	nucleic acid binding	667	1632	8251	24075	4.8e-08	4.4e-05	LOC_Os01g60100	transposon protein, putative, unclassified, expressed
D or OD	>=3	SBP	GO:0003676	F	nucleic acid binding	667	1632	8251	24075	4.8e-08	4.4e-05	LOC_Os01g23040	retrotransposon protein, putative, Ty3-gypsy subclass, expressed
D or OD	>=3	SBP	GO:0003676	F	nucleic acid binding	667	1632	8251	24075	4.8e-08	4.4e-05	LOC_Os03g26020	retrotransposon protein, putative, unclassified, expressed
D or OD	>=3	SBP	GO:0003676	F	nucleic acid binding	667	1632	8251	24075	4.8e-08	4.4e-05	LOC_Os04g04720	retrotransposon protein, putative, unclassified, expressed
D or OD	>=3	SBP	GO:0003676	F	nucleic acid binding	667	1632	8251	24075	4.8e-08	4.4e-05	LOC_Os08g24040	retrotransposon protein, putative, unclassified, expressed
D or OD	>=3	SBP	GO:0003676	F	nucleic acid binding	667	1632	8251	24075	4.8e-08	4.4e-05	LOC_Os06g37720	retrotransposon protein, putative, Ty3-gypsy subclass, expressed
D or OD	>=3	SBP	GO:0003676	F	nucleic acid binding	667	1632	8251	24075	4.8e-08	4.4e-05	LOC_Os08g24120	retrotransposon protein, putative, unclassified, expressed
D or OD	>=3	SBP	GO:0003676	F	nucleic acid binding	667	1632	8251	24075	4.8e-08	4.4e-05	LOC_Os12g33000	retrotransposon protein, putative, unclassified, expressed
D or OD	>=3	SBP	GO:0003676	F	nucleic acid binding	667	1632	8251	24075	4.8e-08	4.4e-05	LOC_Os09g14690	retrotransposon protein, putative, unclassified, expressed
D or OD	>=3	SBP	GO:0003676	F	nucleic acid binding	667	1632	8251	24075	4.8e-08	4.4e-05	LOC_Os07g32730	DNA repair protein rhp16, putative, expressed
D or OD	>=3	SBP	GO:0003676	F	nucleic acid binding	667	1632	8251	24075	4.8e-08	4.4e-05	LOC_Os08g09800	WRKY105, expressed
D or OD	>=3	SBP	GO:0003676	F	nucleic acid binding	667	1632	8251	24075	4.8e-08	4.4e-05	LOC_Os06g49080	zinc finger C-x8-C-x5-C-x3-H type family protein, expressed
D or OD	>=3	SBP	GO:0003676	F	nucleic acid binding	667	1632	8251	24075	4.8e-08	4.4e-05	LOC_Os06g49720	retrotransposon protein, putative, unclassified, expressed
D or OD	>=3	SBP	GO:0003676	F	nucleic acid binding	667	1632	8251	24075	4.8e-08	4.4e-05	LOC_Os01g68320	DEAD-box ATP-dependent RNA helicase 30, putative, expressed
D or OD	>=3	SBP	GO:0003676	F	nucleic acid binding	667	1632	8251	24075	4.8e-08	4.4e-05	LOC_Os01g59350	transcription factor, putative, expressed
D or OD	>=3	SBP	GO:0003676	F	nucleic acid binding	667	1632	8251	24075	4.8e-08	4.4e-05	LOC_Os01g12090	ribosomal protein S6 family protein, putative, expressed
D or OD	>=3	SBP	GO:0003676	F	nucleic acid binding	667	1632	8251	24075	4.8e-08	4.4e-05	LOC_Os09g19290	retrotransposon protein, putative, unclassified, expressed
D or OD	>=3	SBP	GO:0003676	F	nucleic acid binding	667	1632	8251	24075	4.8e-08	4.4e-05	LOC_Os07g24740	retrotransposon protein, putative, Ty3-gypsy subclass, expressed
D or OD	>=3	SBP	GO:0003676	F	nucleic acid binding	667	1632	8251	24075	4.8e-08	4.4e-05	LOC_Os03g02780	Core histone H2A/H2B/H3/H4 domain containing protein, putative, expressed
D or OD	>=3	SBP	GO:0003676	F	nucleic acid binding	667	1632	8251	24075	4.8e-08	4.4e-05	LOC_Os06g49840	OsMADS16 - MADS-box family gene with MIKCc type-box, expressed
D or OD	>=3	SBP	GO:0003676	F	nucleic acid binding	667	1632	8251	24075	4.8e-08	4.4e-05	LOC_Os07g23210	transposon protein, putative, unclassified, expressed
D or OD	>=3	SBP	GO:0003676	F	nucleic acid binding	667	1632	8251	24075	4.8e-08	4.4e-05	LOC_Os03g33328	retrotransposon protein, putative, Ty3-gypsy subclass, expressed
D or OD	>=3	SBP	GO:0003676	F	nucleic acid binding	667	1632	8251	24075	4.8e-08	4.4e-05	LOC_Os09g06800	retrotransposon protein, putative, Ty3-gypsy subclass, expressed
D or OD	>=3	SBP	GO:0003676	F	nucleic acid binding	667	1632	8251	24075	4.8e-08	4.4e-05	LOC_Os03g33890	retrotransposon protein, putative, unclassified
D or OD	>=3	SBP	GO:0003676	F	nucleic acid binding	667	1632	8251	24075	4.8e-08	4.4e-05	LOC_Os01g59760	bZIP transcription factor, putative, expressed
D or OD	>=3	SBP	GO:0003676	F	nucleic acid binding	667	1632	8251	24075	4.8e-08	4.4e-05	LOC_Os07g17440	retrotransposon protein, putative, Ty1-copia subclass, expressed
D or OD	>=3	SBP	GO:0003676	F	nucleic acid binding	667	1632	8251	24075	4.8e-08	4.4e-05	LOC_Os12g16060	retrotransposon protein, putative, Ty1-copia subclass, expressed
D or OD	>=3	SBP	GO:0003676	F	nucleic acid binding	667	1632	8251	24075	4.8e-08	4.4e-05	LOC_Os02g44190	retrotransposon protein, putative, Ty3-gypsy subclass
D or OD	>=3	SBP	GO:0003676	F	nucleic acid binding	667	1632	8251	24075	4.8e-08	4.4e-05	LOC_Os03g39350	retrotransposon protein, putative, Ty3-gypsy subclass, expressed
D or OD	>=3	SBP	GO:0003676	F	nucleic acid binding	667	1632	8251	24075	4.8e-08	4.4e-05	LOC_Os06g39820	retrotransposon protein, putative, unclassified, expressed
D or OD	>=3	SBP	GO:0003676	F	nucleic acid binding	667	1632	8251	24075	4.8e-08	4.4e-05	LOC_Os06g39280	retrotransposon protein, putative, unclassified, expressed
D or OD	>=3	SBP	GO:0003676	F	nucleic acid binding	667	1632	8251	24075	4.8e-08	4.4e-05	LOC_Os04g05300	retrotransposon protein, putative, Ty3-gypsy subclass, expressed
D or OD	>=3	SBP	GO:0003676	F	nucleic acid binding	667	1632	8251	24075	4.8e-08	4.4e-05	LOC_Os03g35390	retrotransposon protein, putative, unclassified, expressed
D or OD	>=3	SBP	GO:0003676	F	nucleic acid binding	667	1632	8251	24075	4.8e-08	4.4e-05	LOC_Os07g17650	retrotransposon protein, putative, unclassified
D or OD	>=3	SBP	GO:0003676	F	nucleic acid binding	667	1632	8251	24075	4.8e-08	4.4e-05	LOC_Os07g25010	retrotransposon protein, putative, Ty3-gypsy subclass, expressed
D or OD	>=3	SBP	GO:0003676	F	nucleic acid binding	667	1632	8251	24075	4.8e-08	4.4e-05	LOC_Os07g25190	retrotransposon protein, putative, Ty3-gypsy subclass, expressed
D or OD	>=3	SBP	GO:0003676	F	nucleic acid binding	667	1632	8251	24075	4.8e-08	4.4e-05	LOC_Os02g45120	expressed protein
D or OD	>=3	SBP	GO:0003676	F	nucleic acid binding	667	1632	8251	24075	4.8e-08	4.4e-05	LOC_Os03g39560	retrotransposon protein, putative, unclassified, expressed
D or OD	>=3	SBP	GO:0003676	F	nucleic acid binding	667	1632	8251	24075	4.8e-08	4.4e-05	LOC_Os04g04590	retrotransposon protein, putative, Ty3-gypsy subclass, expressed
D or OD	>=3	SBP	GO:0003676	F	nucleic acid binding	667	1632	8251	24075	4.8e-08	4.4e-05	LOC_Os01g58920	retrotransposon protein, putative, Ty3-gypsy subclass, expressed
D or OD	>=3	SBP	GO:0003676	F	nucleic acid binding	667	1632	8251	24075	4.8e-08	4.4e-05	LOC_Os07g25210	retrotransposon protein, putative, Ty3-gypsy subclass, expressed
D or OD	>=3	SBP	GO:0003676	F	nucleic acid binding	667	1632	8251	24075	4.8e-08	4.4e-05	LOC_Os06g42690	bZIP transcription factor domain containing protein, expressed
D or OD	>=3	SBP	GO:0003676	F	nucleic acid binding	667	1632	8251	24075	4.8e-08	4.4e-05	LOC_Os06g43290	retrotransposon protein, putative, Ty1-copia subclass, expressed
D or OD	>=3	SBP	GO:0003676	F	nucleic acid binding	667	1632	8251	24075	4.8e-08	4.4e-05	LOC_Os03g39400	retrotransposon protein, putative, Ty1-copia subclass, expressed
D or OD	>=3	SBP	GO:0003676	F	nucleic acid binding	667	1632	8251	24075	4.8e-08	4.4e-05	LOC_Os08g25290	expressed protein
D or OD	>=3	SBP	GO:0003676	F	nucleic acid binding	667	1632	8251	24075	4.8e-08	4.4e-05	LOC_Os07g24340	retrotransposon protein, putative, Ty1-copia subclass, expressed
D or OD	>=3	SBP	GO:0003676	F	nucleic acid binding	667	1632	8251	24075	4.8e-08	4.4e-05	LOC_Os04g53440	RNA recognition motif containing protein, putative, expressed
D or OD	>=3	SBP	GO:0003676	F	nucleic acid binding	667	1632	8251	24075	4.8e-08	4.4e-05	LOC_Os04g05180	retrotransposon protein, putative, unclassified
D or OD	>=3	SBP	GO:0003676	F	nucleic acid binding	667	1632	8251	24075	4.8e-08	4.4e-05	LOC_Os08g25110	transposon protein, putative, unclassified, expressed
D or OD	>=3	SBP	GO:0003676	F	nucleic acid binding	667	1632	8251	24075	4.8e-08	4.4e-05	LOC_Os01g60020	NAC domain transcription factor, putative, expressed
D or OD	>=3	SBP	GO:0003676	F	nucleic acid binding	667	1632	8251	24075	4.8e-08	4.4e-05	LOC_Os07g22770	AP2 domain containing protein, expressed
D or OD	>=3	SBP	GO:0003676	F	nucleic acid binding	667	1632	8251	24075	4.8e-08	4.4e-05	LOC_Os04g04860	retrotransposon protein, putative, Ty3-gypsy subclass, expressed
D or OD	>=3	SBP	GO:0003676	F	nucleic acid binding	667	1632	8251	24075	4.8e-08	4.4e-05	LOC_Os06g39540	retrotransposon protein, putative, unclassified, expressed
D or OD	>=3	SBP	GO:0003676	F	nucleic acid binding	667	1632	8251	24075	4.8e-08	4.4e-05	LOC_Os02g44930	HMG1/2, putative, expressed
D or OD	>=3	SBP	GO:0003676	F	nucleic acid binding	667	1632	8251	24075	4.8e-08	4.4e-05	LOC_Os04g05340	retrotransposon protein, putative, unclassified
D or OD	>=3	SBP	GO:0003676	F	nucleic acid binding	667	1632	8251	24075	4.8e-08	4.4e-05	LOC_Os07g17620	retrotransposon protein, putative, Ty3-gypsy subclass, expressed
D or OD	>=3	SBP	GO:0003676	F	nucleic acid binding	667	1632	8251	24075	4.8e-08	4.4e-05	LOC_Os04g04940	retrotransposon protein, putative, unclassified, expressed
D or OD	>=3	SBP	GO:0003676	F	nucleic acid binding	667	1632	8251	24075	4.8e-08	4.4e-05	LOC_Os07g17480	retrotransposon protein, putative, unclassified
D or OD	>=3	SBP	GO:0003676	F	nucleic acid binding	667	1632	8251	24075	4.8e-08	4.4e-05	LOC_Os08g38990	WRKY30, expressed
D or OD	>=3	SBP	GO:0003676	F	nucleic acid binding	667	1632	8251	24075	4.8e-08	4.4e-05	LOC_Os01g10910	transposon protein, putative, unclassified, expressed
D or OD	>=3	SBP	GO:0003676	F	nucleic acid binding	667	1632	8251	24075	4.8e-08	4.4e-05	LOC_Os09g07120	DNA-directed RNA polymerase 1B, mitochondrial precursor, putative, expressed
D or OD	>=3	SBP	GO:0003676	F	nucleic acid binding	667	1632	8251	24075	4.8e-08	4.4e-05	LOC_Os12g31570	retrotransposon protein, putative, Ty3-gypsy subclass
D or OD	>=3	SBP	GO:0003676	F	nucleic acid binding	667	1632	8251	24075	4.8e-08	4.4e-05	LOC_Os01g11350	bZIP transcription factor domain containing protein, expressed
D or OD	>=3	SBP	GO:0003676	F	nucleic acid binding	667	1632	8251	24075	4.8e-08	4.4e-05	LOC_Os06g43120	zinc finger C-x8-C-x5-C-x3-H type family protein, expressed
D or OD	>=3	SBP	GO:0003676	F	nucleic acid binding	667	1632	8251	24075	4.8e-08	4.4e-05	LOC_Os09g13540	retrotransposon protein, putative, unclassified, expressed
D or OD	>=3	SBP	GO:0003676	F	nucleic acid binding	667	1632	8251	24075	4.8e-08	4.4e-05	LOC_Os08g29490	retrotransposon protein, putative, unclassified, expressed
D or OD	>=3	SBP	GO:0003676	F	nucleic acid binding	667	1632	8251	24075	4.8e-08	4.4e-05	LOC_Os03g39284	retrotransposon protein, putative, unclassified, expressed
D or OD	>=3	SBP	GO:0003676	F	nucleic acid binding	667	1632	8251	24075	4.8e-08	4.4e-05	LOC_Os09g07000	retrotransposon protein, putative, Ty3-gypsy subclass, expressed
D or OD	>=3	SBP	GO:0003676	F	nucleic acid binding	667	1632	8251	24075	4.8e-08	4.4e-05	LOC_Os07g24910	retrotransposon protein, putative, Ty3-gypsy subclass, expressed
D or OD	>=3	SBP	GO:0003676	F	nucleic acid binding	667	1632	8251	24075	4.8e-08	4.4e-05	LOC_Os06g41730	ARID/BRIGHT DNA-binding domain-containing protein, putative, expressed
D or OD	>=3	SBP	GO:0003676	F	nucleic acid binding	667	1632	8251	24075	4.8e-08	4.4e-05	LOC_Os12g15780	retrotransposon protein, putative, unclassified, expressed
D or OD	>=3	SBP	GO:0003676	F	nucleic acid binding	667	1632	8251	24075	4.8e-08	4.4e-05	LOC_Os07g34120	transposon protein, putative, unclassified, expressed
D or OD	>=3	SBP	GO:0003676	F	nucleic acid binding	667	1632	8251	24075	4.8e-08	4.4e-05	LOC_Os01g58810	retrotransposon protein, putative, Ty1-copia subclass, expressed
D or OD	>=3	SBP	GO:0003676	F	nucleic acid binding	667	1632	8251	24075	4.8e-08	4.4e-05	LOC_Os07g23400	retrotransposon protein, putative, Ty1-copia subclass, expressed
D or OD	>=3	SBP	GO:0003676	F	nucleic acid binding	667	1632	8251	24075	4.8e-08	4.4e-05	LOC_Os08g09320	YL1 nuclear protein C-terminal domain containing protein, expressed
D or OD	>=3	SBP	GO:0003676	F	nucleic acid binding	667	1632	8251	24075	4.8e-08	4.4e-05	LOC_Os01g60560	retrotransposon protein, putative, unclassified, expressed
D or OD	>=3	SBP	GO:0003676	F	nucleic acid binding	667	1632	8251	24075	4.8e-08	4.4e-05	LOC_Os09g07220	retrotransposon protein, putative, unclassified, expressed
D or OD	>=3	SBP	GO:0003676	F	nucleic acid binding	667	1632	8251	24075	4.8e-08	4.4e-05	LOC_Os07g33010	retrotransposon protein, putative, unclassified, expressed
D or OD	>=3	SBP	GO:0003676	F	nucleic acid binding	667	1632	8251	24075	4.8e-08	4.4e-05	LOC_Os09g07170	retrotransposon protein, putative, unclassified, expressed
D or OD	>=3	SBP	GO:0003676	F	nucleic acid binding	667	1632	8251	24075	4.8e-08	4.4e-05	LOC_Os01g11120	CID11, putative, expressed
D or OD	>=3	SBP	GO:0003676	F	nucleic acid binding	667	1632	8251	24075	4.8e-08	4.4e-05	LOC_Os01g60480	retrotransposon protein, putative, unclassified, expressed
D or OD	>=3	SBP	GO:0003676	F	nucleic acid binding	667	1632	8251	24075	4.8e-08	4.4e-05	LOC_Os06g49540	transposon protein, putative, unclassified, expressed
D or OD	>=3	SBP	GO:0003676	F	nucleic acid binding	667	1632	8251	24075	4.8e-08	4.4e-05	LOC_Os01g23160	retrotransposon protein, putative, unclassified
D or OD	>=3	SBP	GO:0003676	F	nucleic acid binding	667	1632	8251	24075	4.8e-08	4.4e-05	LOC_Os12g33320	retrotransposon protein, putative, unclassified, expressed
D or OD	>=3	SBP	GO:0003676	F	nucleic acid binding	667	1632	8251	24075	4.8e-08	4.4e-05	LOC_Os08g24080	retrotransposon protein, putative, unclassified
D or OD	>=3	SBP	GO:0003676	F	nucleic acid binding	667	1632	8251	24075	4.8e-08	4.4e-05	LOC_Os11g18580	retrotransposon protein, putative, Ty1-copia subclass, expressed
D or OD	>=3	SBP	GO:0003676	F	nucleic acid binding	667	1632	8251	24075	4.8e-08	4.4e-05	LOC_Os12g33690	retrotransposon protein, putative, Ty3-gypsy subclass, expressed
D or OD	>=3	SBP	GO:0003676	F	nucleic acid binding	667	1632	8251	24075	4.8e-08	4.4e-05	LOC_Os06g49350	retrotransposon protein, putative, unclassified, expressed
D or OD	>=3	SBP	GO:0003676	F	nucleic acid binding	667	1632	8251	24075	4.8e-08	4.4e-05	LOC_Os09g19530	transposon protein, putative, unclassified, expressed
D or OD	>=3	SBP	GO:0003676	F	nucleic acid binding	667	1632	8251	24075	4.8e-08	4.4e-05	LOC_Os03g33500	retrotransposon protein, putative, unclassified, expressed
D or OD	>=3	SBP	GO:0003676	F	nucleic acid binding	667	1632	8251	24075	4.8e-08	4.4e-05	LOC_Os03g33050	retrotransposon protein, putative, unclassified
D or OD	>=3	SBP	GO:0003676	F	nucleic acid binding	667	1632	8251	24075	4.8e-08	4.4e-05	LOC_Os06g49210	retrotransposon protein, putative, unclassified, expressed
D or OD	>=3	SBP	GO:0003676	F	nucleic acid binding	667	1632	8251	24075	4.8e-08	4.4e-05	LOC_Os06g40040	protein of unknown function domain containing protein, expressed
D or OD	>=3	SBP	GO:0003676	F	nucleic acid binding	667	1632	8251	24075	4.8e-08	4.4e-05	LOC_Os10g11954	retrotransposon protein, putative, unclassified, expressed
D or OD	>=3	SBP	GO:0003676	F	nucleic acid binding	667	1632	8251	24075	4.8e-08	4.4e-05	LOC_Os09g13570	CPuORF2 - conserved peptide uORF-containing transcript, expressed
D or OD	>=3	SBP	GO:0003676	F	nucleic acid binding	667	1632	8251	24075	4.8e-08	4.4e-05	LOC_Os10g10920	retrotransposon protein, putative, Ty3-gypsy subclass
D or OD	>=3	SBP	GO:0003676	F	nucleic acid binding	667	1632	8251	24075	4.8e-08	4.4e-05	LOC_Os07g24810	retrotransposon protein, putative, unclassified, expressed
D or OD	>=3	SBP	GO:0003676	F	nucleic acid binding	667	1632	8251	24075	4.8e-08	4.4e-05	LOC_Os03g33680	retrotransposon protein, putative, Ty3-gypsy subclass, expressed
D or OD	>=3	SBP	GO:0003676	F	nucleic acid binding	667	1632	8251	24075	4.8e-08	4.4e-05	LOC_Os04g04990	retrotransposon protein, putative, Ty1-copia subclass, expressed
D or OD	>=3	SBP	GO:0003676	F	nucleic acid binding	667	1632	8251	24075	4.8e-08	4.4e-05	LOC_Os10g10970	transposon protein, putative, unclassified
D or OD	>=3	SBP	GO:0003676	F	nucleic acid binding	667	1632	8251	24075	4.8e-08	4.4e-05	LOC_Os09g28354	CPuORF39 - conserved peptide uORF-containing transcript, expressed
D or OD	>=3	SBP	GO:0003676	F	nucleic acid binding	667	1632	8251	24075	4.8e-08	4.4e-05	LOC_Os12g33520	retrotransposon, putative, centromere-specific, expressed
D or OD	>=3	SBP	GO:0003676	F	nucleic acid binding	667	1632	8251	24075	4.8e-08	4.4e-05	LOC_Os09g07010	retrotransposon protein, putative, unclassified, expressed
D or OD	>=3	SBP	GO:0003676	F	nucleic acid binding	667	1632	8251	24075	4.8e-08	4.4e-05	LOC_Os08g25220	retrotransposon protein, putative, unclassified, expressed
D or OD	>=3	SBP	GO:0003676	F	nucleic acid binding	667	1632	8251	24075	4.8e-08	4.4e-05	LOC_Os11g18290	retrotransposon protein, putative, unclassified, expressed
D or OD	>=3	SBP	GO:0003676	F	nucleic acid binding	667	1632	8251	24075	4.8e-08	4.4e-05	LOC_Os06g42770	type II intron maturase protein, putative, expressed
D or OD	>=3	SBP	GO:0003676	F	nucleic acid binding	667	1632	8251	24075	4.8e-08	4.4e-05	LOC_Os08g10030	KH domain-containing protein, putative, expressed
D or OD	>=3	SBP	GO:0003676	F	nucleic acid binding	667	1632	8251	24075	4.8e-08	4.4e-05	LOC_Os04g29290	retrotransposon protein, putative, unclassified
D or OD	>=3	SBP	GO:0003676	F	nucleic acid binding	667	1632	8251	24075	4.8e-08	4.4e-05	LOC_Os09g31180	ribosomal protein L6, putative, expressed
D or OD	>=3	SBP	GO:0003676	F	nucleic acid binding	667	1632	8251	24075	4.8e-08	4.4e-05	LOC_Os07g17610	retrotransposon protein, putative, Ty3-gypsy subclass, expressed
D or OD	>=3	SBP	GO:0003676	F	nucleic acid binding	667	1632	8251	24075	4.8e-08	4.4e-05	LOC_Os06g39900	agenet domain containing protein, putative, expressed
D or OD	>=3	SBP	GO:0003676	F	nucleic acid binding	667	1632	8251	24075	4.8e-08	4.4e-05	LOC_Os06g50200	retrotransposon protein, putative, unclassified, expressed
D or OD	>=3	SBP	GO:0003676	F	nucleic acid binding	667	1632	8251	24075	4.8e-08	4.4e-05	LOC_Os12g33910	retrotransposon protein, putative, Ty3-gypsy subclass, expressed
D or OD	>=3	SBP	GO:0003676	F	nucleic acid binding	667	1632	8251	24075	4.8e-08	4.4e-05	LOC_Os07g25270	retrotransposon protein, putative, Ty3-gypsy subclass, expressed
D or OD	>=3	SBP	GO:0003676	F	nucleic acid binding	667	1632	8251	24075	4.8e-08	4.4e-05	LOC_Os07g17580	retrotransposon protein, putative, Ty3-gypsy subclass, expressed
D or OD	>=3	SBP	GO:0003676	F	nucleic acid binding	667	1632	8251	24075	4.8e-08	4.4e-05	LOC_Os03g32970	retrotransposon protein, putative, unclassified
D or OD	>=3	SBP	GO:0003676	F	nucleic acid binding	667	1632	8251	24075	4.8e-08	4.4e-05	LOC_Os10g10990	transcription initiation factor IIF, alpha subunit domain containing protein, expressed
D or OD	>=3	SBP	GO:0003676	F	nucleic acid binding	667	1632	8251	24075	4.8e-08	4.4e-05	LOC_Os08g24540	retrotransposon protein, putative, unclassified
D or OD	>=3	SBP	GO:0003676	F	nucleic acid binding	667	1632	8251	24075	4.8e-08	4.4e-05	LOC_Os07g24260	retrotransposon protein, putative, unclassified
D or OD	>=3	SBP	GO:0003676	F	nucleic acid binding	667	1632	8251	24075	4.8e-08	4.4e-05	LOC_Os12g32240	eukaryotic translation initiation factor 5A, putative, expressed
D or OD	>=3	SBP	GO:0003676	F	nucleic acid binding	667	1632	8251	24075	4.8e-08	4.4e-05	LOC_Os03g26130	MYB family transcription factor, putative, expressed
D or OD	>=3	SBP	GO:0003676	F	nucleic acid binding	667	1632	8251	24075	4.8e-08	4.4e-05	LOC_Os09g31200	AN1-like zinc finger domain containing protein, expressed
D or OD	>=3	SBP	GO:0003676	F	nucleic acid binding	667	1632	8251	24075	4.8e-08	4.4e-05	LOC_Os07g33330	RNA recognition motif containing protein, putative, expressed
D or OD	>=3	SBP	GO:0003676	F	nucleic acid binding	667	1632	8251	24075	4.8e-08	4.4e-05	LOC_Os11g24990	retrotransposon protein, putative, unclassified, expressed
D or OD	>=3	SBP	GO:0003676	F	nucleic acid binding	667	1632	8251	24075	4.8e-08	4.4e-05	LOC_Os09g07400	retrotransposon protein, putative, unclassified, expressed
D or OD	>=3	SBP	GO:0003676	F	nucleic acid binding	667	1632	8251	24075	4.8e-08	4.4e-05	LOC_Os04g04900	retrotransposon protein, putative, Ty3-gypsy subclass, expressed
D or OD	>=3	SBP	GO:0003676	F	nucleic acid binding	667	1632	8251	24075	4.8e-08	4.4e-05	LOC_Os07g38090	zinc finger family protein, putative, expressed
D or OD	>=3	SBP	GO:0003676	F	nucleic acid binding	667	1632	8251	24075	4.8e-08	4.4e-05	LOC_Os03g27030	RNA recognition motif containing protein, expressed
D or OD	>=3	SBP	GO:0003676	F	nucleic acid binding	667	1632	8251	24075	4.8e-08	4.4e-05	LOC_Os06g43220	AP2 domain containing protein, expressed
D or OD	>=3	SBP	GO:0003676	F	nucleic acid binding	667	1632	8251	24075	4.8e-08	4.4e-05	LOC_Os06g40240	retrotransposon protein, putative, unclassified, expressed
D or OD	>=3	SBP	GO:0003676	F	nucleic acid binding	667	1632	8251	24075	4.8e-08	4.4e-05	LOC_Os03g35430	retrotransposon protein, putative, Ty3-gypsy subclass, expressed
D or OD	>=3	SBP	GO:0003676	F	nucleic acid binding	667	1632	8251	24075	4.8e-08	4.4e-05	LOC_Os01g23230	retrotransposon protein, putative, unclassified
D or OD	>=3	SBP	GO:0003676	F	nucleic acid binding	667	1632	8251	24075	4.8e-08	4.4e-05	LOC_Os06g39400	retrotransposon protein, putative, unclassified, expressed
D or OD	>=3	SBP	GO:0003676	F	nucleic acid binding	667	1632	8251	24075	4.8e-08	4.4e-05	LOC_Os01g22890	retrotransposon protein, putative, Ty1-copia subclass, expressed
D or OD	>=3	SBP	GO:0003676	F	nucleic acid binding	667	1632	8251	24075	4.8e-08	4.4e-05	LOC_Os02g44890	RNA-binding region RNP-1, putative, expressed
D or OD	>=3	SBP	GO:0003676	F	nucleic acid binding	667	1632	8251	24075	4.8e-08	4.4e-05	LOC_Os07g17720	retrotransposon protein, putative, Ty3-gypsy subclass
D or OD	>=3	SBP	GO:0003676	F	nucleic acid binding	667	1632	8251	24075	4.8e-08	4.4e-05	LOC_Os09g07410	retrotransposon protein, putative, unclassified, expressed
D or OD	>=3	SBP	GO:0003676	F	nucleic acid binding	667	1632	8251	24075	4.8e-08	4.4e-05	LOC_Os04g29520	retrotransposon protein, putative, unclassified, expressed
D or OD	>=3	SBP	GO:0003676	F	nucleic acid binding	667	1632	8251	24075	4.8e-08	4.4e-05	LOC_Os12g33140	expressed protein
D or OD	>=3	SBP	GO:0003676	F	nucleic acid binding	667	1632	8251	24075	4.8e-08	4.4e-05	LOC_Os12g15820	retrotransposon protein, putative, Ty3-gypsy subclass, expressed
D or OD	>=3	SBP	GO:0003676	F	nucleic acid binding	667	1632	8251	24075	4.8e-08	4.4e-05	LOC_Os09g34060	transcription factor RF2a, putative, expressed
D or OD	>=3	SBP	GO:0003676	F	nucleic acid binding	667	1632	8251	24075	4.8e-08	4.4e-05	LOC_Os04g29160	retrotransposon protein, putative, unclassified, expressed
D or OD	>=3	SBP	GO:0003676	F	nucleic acid binding	667	1632	8251	24075	4.8e-08	4.4e-05	LOC_Os04g06110	retrotransposon protein, putative, Ty3-gypsy subclass, expressed
D or OD	>=3	SBP	GO:0003676	F	nucleic acid binding	667	1632	8251	24075	4.8e-08	4.4e-05	LOC_Os09g19620	retrotransposon protein, putative, unclassified
D or OD	>=3	SBP	GO:0003676	F	nucleic acid binding	667	1632	8251	24075	4.8e-08	4.4e-05	LOC_Os01g58560	transposon protein, putative, unclassified
D or OD	>=3	SBP	GO:0003676	F	nucleic acid binding	667	1632	8251	24075	4.8e-08	4.4e-05	LOC_Os03g15160	retrotransposon protein, putative, Ty3-gypsy subclass, expressed
D or OD	>=3	SBP	GO:0003676	F	nucleic acid binding	667	1632	8251	24075	4.8e-08	4.4e-05	LOC_Os04g06290	retrotransposon protein, putative, unclassified, expressed
D or OD	>=3	SBP	GO:0003676	F	nucleic acid binding	667	1632	8251	24075	4.8e-08	4.4e-05	LOC_Os07g24310	retrotransposon protein, putative, unclassified, expressed
D or OD	>=3	SBP	GO:0003676	F	nucleic acid binding	667	1632	8251	24075	4.8e-08	4.4e-05	LOC_Os09g35000	flap endonuclease, putative, expressed
D or OD	>=3	SBP	GO:0003676	F	nucleic acid binding	667	1632	8251	24075	4.8e-08	4.4e-05	LOC_Os12g34050	retrotransposon protein, putative, unclassified
D or OD	>=3	SBP	GO:0003676	F	nucleic acid binding	667	1632	8251	24075	4.8e-08	4.4e-05	LOC_Os12g34054	mitochondrial ribosomal protein S3, putative, expressed
D or OD	>=3	SBP	GO:0003676	F	nucleic acid binding	667	1632	8251	24075	4.8e-08	4.4e-05	LOC_Os12g34056	mitochondrial 60S ribosomal protein L16, putative, expressed
D or OD	>=3	SBP	GO:0003676	F	nucleic acid binding	667	1632	8251	24075	4.8e-08	4.4e-05	LOC_Os07g22960	retrotransposon protein, putative, unclassified, expressed
D or OD	>=3	SBP	GO:0003676	F	nucleic acid binding	667	1632	8251	24075	4.8e-08	4.4e-05	LOC_Os07g17750	retrotransposon protein, putative, unclassified, expressed
D or OD	>=3	SBP	GO:0003676	F	nucleic acid binding	667	1632	8251	24075	4.8e-08	4.4e-05	LOC_Os04g04830	retrotransposon protein, putative, unclassified
D or OD	>=3	SBP	GO:0003676	F	nucleic acid binding	667	1632	8251	24075	4.8e-08	4.4e-05	LOC_Os04g42600	polyadenylate-binding protein, putative, expressed
D or OD	>=3	SBP	GO:0003676	F	nucleic acid binding	667	1632	8251	24075	4.8e-08	4.4e-05	LOC_Os12g16150	retrotransposon protein, putative, Ty3-gypsy subclass, expressed
D or OD	>=3	SBP	GO:0003676	F	nucleic acid binding	667	1632	8251	24075	4.8e-08	4.4e-05	LOC_Os12g31748	OsMADS20 - MADS-box family gene with MIKCc type-box, expressed
D or OD	>=3	SBP	GO:0003676	F	nucleic acid binding	667	1632	8251	24075	4.8e-08	4.4e-05	LOC_Os01g60520	WRKY116, expressed
D or OD	>=3	SBP	GO:0003676	F	nucleic acid binding	667	1632	8251	24075	4.8e-08	4.4e-05	LOC_Os09g35010	dehydration-responsive element-binding protein, putative, expressed
D or OD	>=3	SBP	GO:0003676	F	nucleic acid binding	667	1632	8251	24075	4.8e-08	4.4e-05	LOC_Os12g32140	transposon protein, putative, unclassified, expressed
D or OD	>=3	SBP	GO:0003676	F	nucleic acid binding	667	1632	8251	24075	4.8e-08	4.4e-05	LOC_Os02g44150	retrotransposon protein, putative, Ty1-copia subclass
D or OD	>=3	SBP	GO:0003676	F	nucleic acid binding	667	1632	8251	24075	4.8e-08	4.4e-05	LOC_Os06g39700	DNA-directed RNA polymerase subunit alpha, putative, expressed
D or OD	>=3	SBP	GO:0003676	F	nucleic acid binding	667	1632	8251	24075	4.8e-08	4.4e-05	LOC_Os03g35540	retrotransposon protein, putative, unclassified, expressed
D or OD	>=3	SBP	GO:0003676	F	nucleic acid binding	667	1632	8251	24075	4.8e-08	4.4e-05	LOC_Os01g23120	retrotransposon protein, putative, Ty3-gypsy subclass, expressed
D or OD	>=3	SBP	GO:0003676	F	nucleic acid binding	667	1632	8251	24075	4.8e-08	4.4e-05	LOC_Os12g33360	retrotransposon protein, putative, Ty3-gypsy subclass, expressed
D or OD	>=3	SBP	GO:0003676	F	nucleic acid binding	667	1632	8251	24075	4.8e-08	4.4e-05	LOC_Os01g23280	retrotransposon protein, putative, unclassified
D or OD	>=3	SBP	GO:0003676	F	nucleic acid binding	667	1632	8251	24075	4.8e-08	4.4e-05	LOC_Os06g41384	zinc finger C-x8-C-x5-C-x3-H type family protein, expressed
D or OD	>=3	SBP	GO:0003676	F	nucleic acid binding	667	1632	8251	24075	4.8e-08	4.4e-05	LOC_Os08g09810	WRKY106, expressed
D or OD	>=3	SBP	GO:0003676	F	nucleic acid binding	667	1632	8251	24075	4.8e-08	4.4e-05	LOC_Os07g22760	conserved hypothetical protein
D or OD	>=3	SBP	GO:0003676	F	nucleic acid binding	667	1632	8251	24075	4.8e-08	4.4e-05	LOC_Os01g68420	OsMADS97 - MADS-box family gene with M-beta type-box, expressed
D or OD	>=3	SBP	GO:0003676	F	nucleic acid binding	667	1632	8251	24075	4.8e-08	4.4e-05	LOC_Os04g06430	retrotransposon protein, putative, Ty3-gypsy subclass, expressed
D or OD	>=3	SBP	GO:0003676	F	nucleic acid binding	667	1632	8251	24075	4.8e-08	4.4e-05	LOC_Os03g03164	homeobox protein knotted-1, putative, expressed
D or OD	>=3	SBP	GO:0003676	F	nucleic acid binding	667	1632	8251	24075	4.8e-08	4.4e-05	LOC_Os09g13510	retrotransposon protein, putative, unclassified, expressed
D or OD	>=3	SBP	GO:0003676	F	nucleic acid binding	667	1632	8251	24075	4.8e-08	4.4e-05	LOC_Os03g33012	WRKY81, expressed
D or OD	>=3	SBP	GO:0003676	F	nucleic acid binding	667	1632	8251	24075	4.8e-08	4.4e-05	LOC_Os07g25130	retrotransposon protein, putative, Ty3-gypsy subclass, expressed
D or OD	>=3	SBP	GO:0003676	F	nucleic acid binding	667	1632	8251	24075	4.8e-08	4.4e-05	LOC_Os02g45080	MYB family transcription factor, putative, expressed
D or OD	>=3	SBP	GO:0003676	F	nucleic acid binding	667	1632	8251	24075	4.8e-08	4.4e-05	LOC_Os12g16050	retrotransposon protein, putative, Ty3-gypsy subclass, expressed
D or OD	>=3	SBP	GO:0003676	F	nucleic acid binding	667	1632	8251	24075	4.8e-08	4.4e-05	LOC_Os06g39790	retrotransposon protein, putative, unclassified, expressed
D or OD	>=3	SBP	GO:0003676	F	nucleic acid binding	667	1632	8251	24075	4.8e-08	4.4e-05	LOC_Os08g25330	retrotransposon protein, putative, Ty3-gypsy subclass
D or OD	>=3	SBP	GO:0003676	F	nucleic acid binding	667	1632	8251	24075	4.8e-08	4.4e-05	LOC_Os12g15900	retrotransposon protein, putative, unclassified, expressed
D or OD	>=3	SBP	GO:0003676	F	nucleic acid binding	667	1632	8251	24075	4.8e-08	4.4e-05	LOC_Os12g34180	retrotransposon protein, putative, Ty3-gypsy subclass, expressed
D or OD	>=3	SBP	GO:0003676	F	nucleic acid binding	667	1632	8251	24075	4.8e-08	4.4e-05	LOC_Os03g33720	retrotransposon protein, putative, Ty3-gypsy subclass
D or OD	>=3	SBP	GO:0003676	F	nucleic acid binding	667	1632	8251	24075	4.8e-08	4.4e-05	LOC_Os11g18240	retrotransposon protein, putative, Ty3-gypsy subclass, expressed
D or OD	>=3	SBP	GO:0003676	F	nucleic acid binding	667	1632	8251	24075	4.8e-08	4.4e-05	LOC_Os07g24850	retrotransposon protein, putative, unclassified, expressed
D or OD	>=3	SBP	GO:0003676	F	nucleic acid binding	667	1632	8251	24075	4.8e-08	4.4e-05	LOC_Os06g43460	retrotransposon protein, putative, unclassified, expressed
D or OD	>=3	SBP	GO:0003676	F	nucleic acid binding	667	1632	8251	24075	4.8e-08	4.4e-05	LOC_Os06g40330	MYB family transcription factor, putative, expressed
D or OD	>=3	SBP	GO:0003676	F	nucleic acid binding	667	1632	8251	24075	4.8e-08	4.4e-05	LOC_Os07g24420	retrotransposon protein, putative, Ty3-gypsy subclass
D or OD	>=3	SBP	GO:0003676	F	nucleic acid binding	667	1632	8251	24075	4.8e-08	4.4e-05	LOC_Os12g32440	retrotransposon protein, putative, Ty1-copia subclass
D or OD	>=3	SBP	GO:0003676	F	nucleic acid binding	667	1632	8251	24075	4.8e-08	4.4e-05	LOC_Os04g04160	retrotransposon protein, putative, Ty3-gypsy subclass, expressed
D or OD	>=3	SBP	GO:0003676	F	nucleic acid binding	667	1632	8251	24075	4.8e-08	4.4e-05	LOC_Os04g05270	retrotransposon protein, putative, unclassified
D or OD	>=3	SBP	GO:0003676	F	nucleic acid binding	667	1632	8251	24075	4.8e-08	4.4e-05	LOC_Os07g23040	retrotransposon protein, putative, unclassified, expressed
D or OD	>=3	SBP	GO:0003676	F	nucleic acid binding	667	1632	8251	24075	4.8e-08	4.4e-05	LOC_Os10g11680	retrotransposon protein, putative, unclassified, expressed
D or OD	>=3	SBP	GO:0003676	F	nucleic acid binding	667	1632	8251	24075	4.8e-08	4.4e-05	LOC_Os04g06420	retrotransposon protein, putative, unclassified, expressed
D or OD	>=3	SBP	GO:0003676	F	nucleic acid binding	667	1632	8251	24075	4.8e-08	4.4e-05	LOC_Os09g07270	retrotransposon protein, putative, Ty3-gypsy subclass, expressed
D or OD	>=3	SBP	GO:0003676	F	nucleic acid binding	667	1632	8251	24075	4.8e-08	4.4e-05	LOC_Os04g04710	retrotransposon protein, putative, unclassified, expressed
D or OD	>=3	SBP	GO:0003676	F	nucleic acid binding	667	1632	8251	24075	4.8e-08	4.4e-05	LOC_Os08g24760	ATP-dependent RNA helicase, putative, expressed
D or OD	>=3	SBP	GO:0003676	F	nucleic acid binding	667	1632	8251	24075	4.8e-08	4.4e-05	LOC_Os06g38010	retrotransposon protein, putative, Ty3-gypsy subclass, expressed
D or OD	>=3	SBP	GO:0003676	F	nucleic acid binding	667	1632	8251	24075	4.8e-08	4.4e-05	LOC_Os04g04490	retrotransposon protein, putative, Ty3-gypsy subclass, expressed
D or OD	>=3	SBP	GO:0003676	F	nucleic acid binding	667	1632	8251	24075	4.8e-08	4.4e-05	LOC_Os09g35020	AP2 domain containing protein, expressed
D or OD	>=3	SBP	GO:0003676	F	nucleic acid binding	667	1632	8251	24075	4.8e-08	4.4e-05	LOC_Os01g28760	retrotransposon protein, putative, Ty1-copia subclass, expressed
D or OD	>=3	SBP	GO:0003676	F	nucleic acid binding	667	1632	8251	24075	4.8e-08	4.4e-05	LOC_Os12g15630	retrotransposon protein, putative, unclassified, expressed
D or OD	>=3	SBP	GO:0003676	F	nucleic acid binding	667	1632	8251	24075	4.8e-08	4.4e-05	LOC_Os06g50480	bZIP transcription factor domain containing protein, expressed
D or OD	>=3	SBP	GO:0003676	F	nucleic acid binding	667	1632	8251	24075	4.8e-08	4.4e-05	LOC_Os03g33340	retrotransposon protein, putative, Ty3-gypsy subclass
D or OD	>=3	SBP	GO:0003676	F	nucleic acid binding	667	1632	8251	24075	4.8e-08	4.4e-05	LOC_Os08g25190	retrotransposon protein, putative, unclassified, expressed
D or OD	>=3	SBP	GO:0003676	F	nucleic acid binding	667	1632	8251	24075	4.8e-08	4.4e-05	LOC_Os08g09100	RNA recognition motif containing protein, putative, expressed
D or OD	>=3	SBP	GO:0003676	F	nucleic acid binding	667	1632	8251	24075	4.8e-08	4.4e-05	LOC_Os06g49040	Myb-like DNA-binding domain containing protein, putative, expressed
D or OD	>=3	SBP	GO:0003676	F	nucleic acid binding	667	1632	8251	24075	4.8e-08	4.4e-05	LOC_Os07g24720	retrotransposon protein, putative, unclassified
D or OD	>=3	SBP	GO:0003676	F	nucleic acid binding	667	1632	8251	24075	4.8e-08	4.4e-05	LOC_Os07g24100	retrotransposon protein, putative, unclassified, expressed
D or OD	>=3	SBP	GO:0003676	F	nucleic acid binding	667	1632	8251	24075	4.8e-08	4.4e-05	LOC_Os07g32890	3'-5' exonuclease, putative, expressed
D or OD	>=3	SBP	GO:0003676	F	nucleic acid binding	667	1632	8251	24075	4.8e-08	4.4e-05	LOC_Os07g24450	retrotransposon protein, putative, unclassified
D or OD	>=3	SBP	GO:0003676	F	nucleic acid binding	667	1632	8251	24075	4.8e-08	4.4e-05	LOC_Os12g31960	retrotransposon protein, putative, LINE subclass, expressed
D or OD	>=3	SBP	GO:0003676	F	nucleic acid binding	667	1632	8251	24075	4.8e-08	4.4e-05	LOC_Os04g06330	retrotransposon, putative, centromere-specific
D or OD	>=3	SBP	GO:0003676	F	nucleic acid binding	667	1632	8251	24075	4.8e-08	4.4e-05	LOC_Os12g31840	ZOS12-05 - C2H2 zinc finger protein, expressed
D or OD	>=3	SBP	GO:0003676	F	nucleic acid binding	667	1632	8251	24075	4.8e-08	4.4e-05	LOC_Os01g42460	BAH domain containing protein, expressed
D or OD	>=3	SBP	GO:0003676	F	nucleic acid binding	667	1632	8251	24075	4.8e-08	4.4e-05	LOC_Os09g06870	retrotransposon protein, putative, unclassified
D or OD	>=3	SBP	GO:0003676	F	nucleic acid binding	667	1632	8251	24075	4.8e-08	4.4e-05	LOC_Os03g33640	retrotransposon protein, putative, Ty1-copia subclass, expressed
D or OD	>=3	SBP	GO:0003676	F	nucleic acid binding	667	1632	8251	24075	4.8e-08	4.4e-05	LOC_Os10g22210	retrotransposon protein, putative, unclassified, expressed
D or OD	>=3	SBP	GO:0003676	F	nucleic acid binding	667	1632	8251	24075	4.8e-08	4.4e-05	LOC_Os03g33880	retrotransposon protein, putative, unclassified, expressed
D or OD	>=3	SBP	GO:0003676	F	nucleic acid binding	667	1632	8251	24075	4.8e-08	4.4e-05	LOC_Os12g33660	retrotransposon protein, putative, unclassified, expressed
D or OD	>=3	SBP	GO:0003676	F	nucleic acid binding	667	1632	8251	24075	4.8e-08	4.4e-05	LOC_Os09g35030	dehydration-responsive element-binding protein, putative, expressed
D or OD	>=3	SBP	GO:0003676	F	nucleic acid binding	667	1632	8251	24075	4.8e-08	4.4e-05	LOC_Os02g44440	retrotransposon protein, putative, unclassified, expressed
D or OD	>=3	SBP	GO:0003676	F	nucleic acid binding	667	1632	8251	24075	4.8e-08	4.4e-05	LOC_Os11g25350	retrotransposon protein, putative, unclassified
D or OD	>=3	SBP	GO:0003676	F	nucleic acid binding	667	1632	8251	24075	4.8e-08	4.4e-05	LOC_Os01g41960	retrotransposon protein, putative, unclassified, expressed
D or OD	>=3	SBP	GO:0003676	F	nucleic acid binding	667	1632	8251	24075	4.8e-08	4.4e-05	LOC_Os06g39930	retrotransposon protein, putative, unclassified, expressed
D or OD	>=3	SBP	GO:0003676	F	nucleic acid binding	667	1632	8251	24075	4.8e-08	4.4e-05	LOC_Os01g10720	retrotransposon protein, putative, unclassified, expressed
D or OD	>=3	SBP	GO:0003676	F	nucleic acid binding	667	1632	8251	24075	4.8e-08	4.4e-05	LOC_Os03g26704	retrotransposon protein, putative, Ty3-gypsy subclass, expressed
D or OD	>=3	SBP	GO:0003676	F	nucleic acid binding	667	1632	8251	24075	4.8e-08	4.4e-05	LOC_Os07g38350	retrotransposon protein, putative, Ty1-copia subclass, expressed
D or OD	>=3	SBP	GO:0003676	F	nucleic acid binding	667	1632	8251	24075	4.8e-08	4.4e-05	LOC_Os06g41690	retrotransposon protein, putative, unclassified, expressed
D or OD	>=3	SBP	GO:0003676	F	nucleic acid binding	667	1632	8251	24075	4.8e-08	4.4e-05	LOC_Os12g32250	WRKY96, expressed
D or OD	>=3	SBP	GO:0003676	F	nucleic acid binding	667	1632	8251	24075	4.8e-08	4.4e-05	LOC_Os10g34750	LIG1 - Putative DNA ligase I, expressed
D or OD	>=3	SBP	GO:0003676	F	nucleic acid binding	667	1632	8251	24075	4.8e-08	4.4e-05	LOC_Os08g24470	expressed protein
D or OD	>=3	SBP	GO:0003676	F	nucleic acid binding	667	1632	8251	24075	4.8e-08	4.4e-05	LOC_Os07g24350	homeobox domain containing protein, expressed
D or OD	>=3	SBP	GO:0003676	F	nucleic acid binding	667	1632	8251	24075	4.8e-08	4.4e-05	LOC_Os03g35480	retrotransposon, putative, centromere-specific
D or OD	>=3	SBP	GO:0003676	F	nucleic acid binding	667	1632	8251	24075	4.8e-08	4.4e-05	LOC_Os12g15700	retrotransposon protein, putative, unclassified, expressed
D or OD	>=3	SBP	GO:0003676	F	nucleic acid binding	667	1632	8251	24075	4.8e-08	4.4e-05	LOC_Os12g34090	retrotransposon protein, putative, Ty3-gypsy subclass, expressed
D or OD	>=3	SBP	GO:0003676	F	nucleic acid binding	667	1632	8251	24075	4.8e-08	4.4e-05	LOC_Os08g24570	retrotransposon protein, putative, Ty3-gypsy subclass, expressed
D or OD	>=3	SBP	GO:0003676	F	nucleic acid binding	667	1632	8251	24075	4.8e-08	4.4e-05	LOC_Os08g39174	retrotransposon protein, putative, Ty1-copia subclass, expressed
D or OD	>=3	SBP	GO:0003676	F	nucleic acid binding	667	1632	8251	24075	4.8e-08	4.4e-05	LOC_Os12g33070	myb-like DNA-binding domain containing protein, putative, expressed
D or OD	>=3	SBP	GO:0003676	F	nucleic acid binding	667	1632	8251	24075	4.8e-08	4.4e-05	LOC_Os07g38340	retrotransposon protein, putative, Ty3-gypsy subclass, expressed
D or OD	>=3	SBP	GO:0003676	F	nucleic acid binding	667	1632	8251	24075	4.8e-08	4.4e-05	LOC_Os06g42990	AP2 domain containing protein, expressed
D or OD	>=3	SBP	GO:0003676	F	nucleic acid binding	667	1632	8251	24075	4.8e-08	4.4e-05	LOC_Os01g02540	retrotransposon protein, putative, unclassified, expressed
D or OD	>=3	SBP	GO:0003676	F	nucleic acid binding	667	1632	8251	24075	4.8e-08	4.4e-05	LOC_Os04g05290	retrotransposon protein, putative, Ty3-gypsy subclass, expressed
D or OD	>=3	SBP	GO:0003676	F	nucleic acid binding	667	1632	8251	24075	4.8e-08	4.4e-05	LOC_Os06g40110	RNA polymerase Rpc34 subunit family protein, expressed
D or OD	>=3	SBP	GO:0003676	F	nucleic acid binding	667	1632	8251	24075	4.8e-08	4.4e-05	LOC_Os01g23470	retrotransposon protein, putative, Ty1-copia subclass, expressed
D or OD	>=3	SBP	GO:0003676	F	nucleic acid binding	667	1632	8251	24075	4.8e-08	4.4e-05	LOC_Os07g24970	retrotransposon protein, putative, Ty3-gypsy subclass, expressed
D or OD	>=3	SBP	GO:0003676	F	nucleic acid binding	667	1632	8251	24075	4.8e-08	4.4e-05	LOC_Os12g15670	retrotransposon protein, putative, unclassified, expressed
D or OD	>=3	SBP	GO:0003676	F	nucleic acid binding	667	1632	8251	24075	4.8e-08	4.4e-05	LOC_Os04g06610	retrotransposon protein, putative, Ty3-gypsy subclass, expressed
D or OD	>=3	SBP	GO:0003676	F	nucleic acid binding	667	1632	8251	24075	4.8e-08	4.4e-05	LOC_Os08g29530	double-stranded RNA binding motif containing protein, expressed
D or OD	>=3	SBP	GO:0003676	F	nucleic acid binding	667	1632	8251	24075	4.8e-08	4.4e-05	LOC_Os03g39330	retrotransposon protein, putative, Ty3-gypsy subclass, expressed
D or OD	>=3	SBP	GO:0003676	F	nucleic acid binding	667	1632	8251	24075	4.8e-08	4.4e-05	LOC_Os06g39840	retrotransposon protein, putative, unclassified, expressed
D or OD	>=3	SBP	GO:0003676	F	nucleic acid binding	667	1632	8251	24075	4.8e-08	4.4e-05	LOC_Os04g29330	retrotransposon protein, putative, Ty3-gypsy subclass, expressed
D or OD	>=3	SBP	GO:0003676	F	nucleic acid binding	667	1632	8251	24075	4.8e-08	4.4e-05	LOC_Os03g28110	retrotransposon protein, putative, unclassified, expressed
D or OD	>=3	SBP	GO:0003676	F	nucleic acid binding	667	1632	8251	24075	4.8e-08	4.4e-05	LOC_Os03g33819	retrotransposon protein, putative, unclassified, expressed
D or OD	>=3	SBP	GO:0003676	F	nucleic acid binding	667	1632	8251	24075	4.8e-08	4.4e-05	LOC_Os03g39500	retrotransposon protein, putative, Ty3-gypsy subclass, expressed
D or OD	>=3	SBP	GO:0003676	F	nucleic acid binding	667	1632	8251	24075	4.8e-08	4.4e-05	LOC_Os04g05710	retrotransposon protein, putative, Ty3-gypsy subclass, expressed
D or OD	>=3	SBP	GO:0003676	F	nucleic acid binding	667	1632	8251	24075	4.8e-08	4.4e-05	LOC_Os04g04530	retrotransposon protein, putative, Ty3-gypsy subclass, expressed
D or OD	>=3	SBP	GO:0003676	F	nucleic acid binding	667	1632	8251	24075	4.8e-08	4.4e-05	LOC_Os07g37200	transposon protein, putative, unclassified, expressed
D or OD	>=3	SBP	GO:0003676	F	nucleic acid binding	667	1632	8251	24075	4.8e-08	4.4e-05	LOC_Os07g24530	retrotransposon protein, putative, unclassified
D or OD	>=3	SBP	GO:0003676	F	nucleic acid binding	667	1632	8251	24075	4.8e-08	4.4e-05	LOC_Os03g32920	retrotransposon protein, putative, Ty3-gypsy subclass
D or OD	>=3	SBP	GO:0003676	F	nucleic acid binding	667	1632	8251	24075	4.8e-08	4.4e-05	LOC_Os01g23270	retrotransposon protein, putative, Ty3-gypsy subclass, expressed
D or OD	>=3	SBP	GO:0003676	F	nucleic acid binding	667	1632	8251	24075	4.8e-08	4.4e-05	LOC_Os03g15520	transposon protein, putative, unclassified, expressed
D or OD	>=3	SBP	GO:0003676	F	nucleic acid binding	667	1632	8251	24075	4.8e-08	4.4e-05	LOC_Os01g68350	retrotransposon protein, putative, unclassified, expressed
D or OD	>=3	SBP	GO:0003676	F	nucleic acid binding	667	1632	8251	24075	4.8e-08	4.4e-05	LOC_Os11g25050	retrotransposon protein, putative, unclassified, expressed
D or OD	>=3	SBP	GO:0003676	F	nucleic acid binding	667	1632	8251	24075	4.8e-08	4.4e-05	LOC_Os01g59780	AP2 domain containing protein, expressed
D or OD	>=3	SBP	GO:0003676	F	nucleic acid binding	667	1632	8251	24075	4.8e-08	4.4e-05	LOC_Os03g15450	retrotransposon protein, putative, Ty3-gypsy subclass, expressed
D or OD	>=3	SBP	GO:0003676	F	nucleic acid binding	667	1632	8251	24075	4.8e-08	4.4e-05	LOC_Os04g04120	retrotransposon protein, putative, Ty1-copia subclass, expressed
D or OD	>=3	SBP	GO:0003676	F	nucleic acid binding	667	1632	8251	24075	4.8e-08	4.4e-05	LOC_Os01g60270	homeobox domain containing protein, expressed
D or OD	>=3	SBP	GO:0003676	F	nucleic acid binding	667	1632	8251	24075	4.8e-08	4.4e-05	LOC_Os10g34890	retrotransposon protein, putative, Ty1-copia subclass, expressed
D or OD	>=3	SBP	GO:0003676	F	nucleic acid binding	667	1632	8251	24075	4.8e-08	4.4e-05	LOC_Os03g34200	retrotransposon protein, putative, Ty3-gypsy subclass, expressed
D or OD	>=3	SBP	GO:0003676	F	nucleic acid binding	667	1632	8251	24075	4.8e-08	4.4e-05	LOC_Os01g42260	transcriptional corepressor LEUNIG, putative, expressed
D or OD	>=3	SBP	GO:0003676	F	nucleic acid binding	667	1632	8251	24075	4.8e-08	4.4e-05	LOC_Os09g07230	retrotransposon protein, putative, unclassified, expressed
D or OD	>=3	SBP	GO:0003676	F	nucleic acid binding	667	1632	8251	24075	4.8e-08	4.4e-05	LOC_Os08g27110	retrotransposon protein, putative, Ty3-gypsy subclass, expressed
D or OD	>=3	SBP	GO:0003676	F	nucleic acid binding	667	1632	8251	24075	4.8e-08	4.4e-05	LOC_Os01g11130	RNA recognition motif containing protein, putative, expressed
D or OD	>=3	SBP	GO:0003676	F	nucleic acid binding	667	1632	8251	24075	4.8e-08	4.4e-05	LOC_Os12g33330	retrotransposon protein, putative, Ty3-gypsy subclass, expressed
D or OD	>=3	SBP	GO:0003676	F	nucleic acid binding	667	1632	8251	24075	4.8e-08	4.4e-05	LOC_Os07g22430	retrotransposon protein, putative, unclassified, expressed
D or OD	>=3	SBP	GO:0003676	F	nucleic acid binding	667	1632	8251	24075	4.8e-08	4.4e-05	LOC_Os03g26290	retrotransposon protein, putative, unclassified, expressed
D or OD	>=3	SBP	GO:0003676	F	nucleic acid binding	667	1632	8251	24075	4.8e-08	4.4e-05	LOC_Os03g33280	retrotransposon protein, putative, Ty3-gypsy subclass, expressed
D or OD	>=3	SBP	GO:0003676	F	nucleic acid binding	667	1632	8251	24075	4.8e-08	4.4e-05	LOC_Os07g25002	chloroplast 30S ribosomal protein S7, putative, expressed
D or OD	>=3	SBP	GO:0003676	F	nucleic acid binding	667	1632	8251	24075	4.8e-08	4.4e-05	LOC_Os07g25000	retrotransposon protein, putative, Ty3-gypsy subclass
D or OD	>=3	SBP	GO:0003676	F	nucleic acid binding	667	1632	8251	24075	4.8e-08	4.4e-05	LOC_Os07g23480	retrotransposon protein, putative, unclassified, expressed
D or OD	>=3	SBP	GO:0003676	F	nucleic acid binding	667	1632	8251	24075	4.8e-08	4.4e-05	LOC_Os03g33044	retrotransposon protein, putative, unclassified, expressed
D or OD	>=3	SBP	GO:0003676	F	nucleic acid binding	667	1632	8251	24075	4.8e-08	4.4e-05	LOC_Os03g02900	B3 DNA binding domain containing protein, expressed
D or OD	>=3	SBP	GO:0003676	F	nucleic acid binding	667	1632	8251	24075	4.8e-08	4.4e-05	LOC_Os03g33042	retrotransposon protein, putative, unclassified, expressed
D or OD	>=3	SBP	GO:0003676	F	nucleic acid binding	667	1632	8251	24075	4.8e-08	4.4e-05	LOC_Os10g11920	retrotransposon protein, putative, Ty3-gypsy subclass, expressed
D or OD	>=3	SBP	GO:0003676	F	nucleic acid binding	667	1632	8251	24075	4.8e-08	4.4e-05	LOC_Os11g45420	retrotransposon protein, putative, unclassified, expressed
D or OD	>=3	SBP	GO:0003676	F	nucleic acid binding	667	1632	8251	24075	4.8e-08	4.4e-05	LOC_Os03g26890	retrotransposon protein, putative, Ty3-gypsy subclass, expressed
D or OD	>=3	SBP	GO:0003676	F	nucleic acid binding	667	1632	8251	24075	4.8e-08	4.4e-05	LOC_Os03g39590	retrotransposon protein, putative, unclassified, expressed
D or OD	>=3	SBP	GO:0016772	F	transferase activity, transferring phosphorus-containing groups	396	1632	4781	24075	1.5e-05	0.0068	LOC_Os03g02190	protein kinase domain containing protein, expressed
D or OD	>=3	SBP	GO:0016772	F	transferase activity, transferring phosphorus-containing groups	396	1632	4781	24075	1.5e-05	0.0068	LOC_Os08g09140	retrotransposon protein, putative, Ty3-gypsy subclass, expressed
D or OD	>=3	SBP	GO:0016772	F	transferase activity, transferring phosphorus-containing groups	396	1632	4781	24075	1.5e-05	0.0068	LOC_Os04g05970	retrotransposon protein, putative, Ty3-gypsy subclass, expressed
D or OD	>=3	SBP	GO:0016772	F	transferase activity, transferring phosphorus-containing groups	396	1632	4781	24075	1.5e-05	0.0068	LOC_Os10g11034	caffeine-induced death protein 1, putative, expressed
D or OD	>=3	SBP	GO:0016772	F	transferase activity, transferring phosphorus-containing groups	396	1632	4781	24075	1.5e-05	0.0068	LOC_Os04g04150	retrotransposon protein, putative, Ty3-gypsy subclass, expressed
D or OD	>=3	SBP	GO:0016772	F	transferase activity, transferring phosphorus-containing groups	396	1632	4781	24075	1.5e-05	0.0068	LOC_Os01g02360	resistance-related receptor-like kinase, putative, expressed
D or OD	>=3	SBP	GO:0016772	F	transferase activity, transferring phosphorus-containing groups	396	1632	4781	24075	1.5e-05	0.0068	LOC_Os10g12030	retrotransposon protein, putative, unclassified, expressed
D or OD	>=3	SBP	GO:0016772	F	transferase activity, transferring phosphorus-containing groups	396	1632	4781	24075	1.5e-05	0.0068	LOC_Os12g34320	S-locus-like receptor protein kinase, putative, expressed
D or OD	>=3	SBP	GO:0016772	F	transferase activity, transferring phosphorus-containing groups	396	1632	4781	24075	1.5e-05	0.0068	LOC_Os07g33130	retrotransposon protein, putative, unclassified, expressed
D or OD	>=3	SBP	GO:0016772	F	transferase activity, transferring phosphorus-containing groups	396	1632	4781	24075	1.5e-05	0.0068	LOC_Os12g33530	retrotransposon protein, putative, Ty3-gypsy subclass, expressed
D or OD	>=3	SBP	GO:0016772	F	transferase activity, transferring phosphorus-containing groups	396	1632	4781	24075	1.5e-05	0.0068	LOC_Os10g22250	retrotransposon protein, putative, Ty3-gypsy subclass, expressed
D or OD	>=3	SBP	GO:0016772	F	transferase activity, transferring phosphorus-containing groups	396	1632	4781	24075	1.5e-05	0.0068	LOC_Os03g39150	protein kinase domain containing protein, expressed
D or OD	>=3	SBP	GO:0016772	F	transferase activity, transferring phosphorus-containing groups	396	1632	4781	24075	1.5e-05	0.0068	LOC_Os02g43870	inactive receptor kinase At2g26730 precursor, putative, expressed
D or OD	>=3	SBP	GO:0016772	F	transferase activity, transferring phosphorus-containing groups	396	1632	4781	24075	1.5e-05	0.0068	LOC_Os05g24730	retrotransposon protein, putative, unclassified
D or OD	>=3	SBP	GO:0016772	F	transferase activity, transferring phosphorus-containing groups	396	1632	4781	24075	1.5e-05	0.0068	LOC_Os09g19390	senescence-induced receptor-like serine/threonine-protein kinase precursor, putative, expressed
D or OD	>=3	SBP	GO:0016772	F	transferase activity, transferring phosphorus-containing groups	396	1632	4781	24075	1.5e-05	0.0068	LOC_Os03g33760	retrotransposon protein, putative, unclassified, expressed
D or OD	>=3	SBP	GO:0016772	F	transferase activity, transferring phosphorus-containing groups	396	1632	4781	24075	1.5e-05	0.0068	LOC_Os03g34190	retrotransposon protein, putative, Ty3-gypsy subclass, expressed
D or OD	>=3	SBP	GO:0016772	F	transferase activity, transferring phosphorus-containing groups	396	1632	4781	24075	1.5e-05	0.0068	LOC_Os01g10710	receptor-like protein kinase, putative, expressed
D or OD	>=3	SBP	GO:0016772	F	transferase activity, transferring phosphorus-containing groups	396	1632	4781	24075	1.5e-05	0.0068	LOC_Os03g27990	STRUBBELIG-RECEPTOR FAMILY 7 precursor, putative, expressed
D or OD	>=3	SBP	GO:0016772	F	transferase activity, transferring phosphorus-containing groups	396	1632	4781	24075	1.5e-05	0.0068	LOC_Os04g06210	cysteine-rich receptor-like protein kinase 36 precursor, putative, expressed
D or OD	>=3	SBP	GO:0016772	F	transferase activity, transferring phosphorus-containing groups	396	1632	4781	24075	1.5e-05	0.0068	LOC_Os03g32960	retrotransposon protein, putative, Ty3-gypsy subclass, expressed
D or OD	>=3	SBP	GO:0016772	F	transferase activity, transferring phosphorus-containing groups	396	1632	4781	24075	1.5e-05	0.0068	LOC_Os04g05900	retrotransposon protein, putative, Ty3-gypsy subclass, expressed
D or OD	>=3	SBP	GO:0016772	F	transferase activity, transferring phosphorus-containing groups	396	1632	4781	24075	1.5e-05	0.0068	LOC_Os08g24530	retrotransposon protein, putative, Ty3-gypsy subclass, expressed
D or OD	>=3	SBP	GO:0016772	F	transferase activity, transferring phosphorus-containing groups	396	1632	4781	24075	1.5e-05	0.0068	LOC_Os07g24520	retrotransposon protein, putative, Ty3-gypsy subclass, expressed
D or OD	>=3	SBP	GO:0016772	F	transferase activity, transferring phosphorus-containing groups	396	1632	4781	24075	1.5e-05	0.0068	LOC_Os06g06930	receptor-like protein kinase, putative, expressed
D or OD	>=3	SBP	GO:0016772	F	transferase activity, transferring phosphorus-containing groups	396	1632	4781	24075	1.5e-05	0.0068	LOC_Os06g43150	retrotransposon protein, putative, unclassified, expressed
D or OD	>=3	SBP	GO:0016772	F	transferase activity, transferring phosphorus-containing groups	396	1632	4781	24075	1.5e-05	0.0068	LOC_Os03g35600	serine/threonine-protein kinase receptor precursor, putative, expressed
D or OD	>=3	SBP	GO:0016772	F	transferase activity, transferring phosphorus-containing groups	396	1632	4781	24075	1.5e-05	0.0068	LOC_Os01g02400	protein kinase domain containing protein, expressed
D or OD	>=3	SBP	GO:0016772	F	transferase activity, transferring phosphorus-containing groups	396	1632	4781	24075	1.5e-05	0.0068	LOC_Os06g38760	retrotransposon protein, putative, unclassified, expressed
D or OD	>=3	SBP	GO:0016772	F	transferase activity, transferring phosphorus-containing groups	396	1632	4781	24075	1.5e-05	0.0068	LOC_Os06g38609	retrotransposon protein, putative, unclassified, expressed
D or OD	>=3	SBP	GO:0016772	F	transferase activity, transferring phosphorus-containing groups	396	1632	4781	24075	1.5e-05	0.0068	LOC_Os09g06820	retrotransposon protein, putative, Ty3-gypsy subclass, expressed
D or OD	>=3	SBP	GO:0016772	F	transferase activity, transferring phosphorus-containing groups	396	1632	4781	24075	1.5e-05	0.0068	LOC_Os07g32690	retrotransposon protein, putative, unclassified, expressed
D or OD	>=3	SBP	GO:0016772	F	transferase activity, transferring phosphorus-containing groups	396	1632	4781	24075	1.5e-05	0.0068	LOC_Os01g23200	retrotransposon protein, putative, Ty3-gypsy subclass, expressed
D or OD	>=3	SBP	GO:0016772	F	transferase activity, transferring phosphorus-containing groups	396	1632	4781	24075	1.5e-05	0.0068	LOC_Os08g24870	retrotransposon protein, putative, unclassified, expressed
D or OD	>=3	SBP	GO:0016772	F	transferase activity, transferring phosphorus-containing groups	396	1632	4781	24075	1.5e-05	0.0068	LOC_Os03g15570	STE_MEKK_ste11_MAP3K.12 - STE kinases include homologs to sterile 7, sterile 11 and sterile 20 from yeast, expressed
D or OD	>=3	SBP	GO:0016772	F	transferase activity, transferring phosphorus-containing groups	396	1632	4781	24075	1.5e-05	0.0068	LOC_Os06g43170	transposon protein, putative, unclassified, expressed
D or OD	>=3	SBP	GO:0016772	F	transferase activity, transferring phosphorus-containing groups	396	1632	4781	24075	1.5e-05	0.0068	LOC_Os06g38780	receptor-like protein kinase 2 precursor, putative, expressed
D or OD	>=3	SBP	GO:0016772	F	transferase activity, transferring phosphorus-containing groups	396	1632	4781	24075	1.5e-05	0.0068	LOC_Os03g26750	retrotransposon protein, putative, Ty3-gypsy subclass, expressed
D or OD	>=3	SBP	GO:0016772	F	transferase activity, transferring phosphorus-containing groups	396	1632	4781	24075	1.5e-05	0.0068	LOC_Os07g25230	retrotransposon protein, putative, unclassified, expressed
D or OD	>=3	SBP	GO:0016772	F	transferase activity, transferring phosphorus-containing groups	396	1632	4781	24075	1.5e-05	0.0068	LOC_Os04g05160	retrotransposon protein, putative, Ty3-gypsy subclass, expressed
D or OD	>=3	SBP	GO:0016772	F	transferase activity, transferring phosphorus-containing groups	396	1632	4781	24075	1.5e-05	0.0068	LOC_Os12g15750	retrotransposon protein, putative, Ty3-gypsy subclass, expressed
D or OD	>=3	SBP	GO:0016772	F	transferase activity, transferring phosphorus-containing groups	396	1632	4781	24075	1.5e-05	0.0068	LOC_Os01g23330	retrotransposon, putative, centromere-specific, expressed
D or OD	>=3	SBP	GO:0016772	F	transferase activity, transferring phosphorus-containing groups	396	1632	4781	24075	1.5e-05	0.0068	LOC_Os04g04800	protein kinase domain containing protein, expressed
D or OD	>=3	SBP	GO:0016772	F	transferase activity, transferring phosphorus-containing groups	396	1632	4781	24075	1.5e-05	0.0068	LOC_Os07g22650	expressed protein
D or OD	>=3	SBP	GO:0016772	F	transferase activity, transferring phosphorus-containing groups	396	1632	4781	24075	1.5e-05	0.0068	LOC_Os04g05220	retrotransposon protein, putative, Ty3-gypsy subclass
D or OD	>=3	SBP	GO:0016772	F	transferase activity, transferring phosphorus-containing groups	396	1632	4781	24075	1.5e-05	0.0068	LOC_Os03g35326	retrotransposon protein, putative, unclassified, expressed
D or OD	>=3	SBP	GO:0016772	F	transferase activity, transferring phosphorus-containing groups	396	1632	4781	24075	1.5e-05	0.0068	LOC_Os09g07070	retrotransposon protein, putative, Ty3-gypsy subclass, expressed
D or OD	>=3	SBP	GO:0016772	F	transferase activity, transferring phosphorus-containing groups	396	1632	4781	24075	1.5e-05	0.0068	LOC_Os03g15250	lectin-like receptor kinase, putative, expressed
D or OD	>=3	SBP	GO:0016772	F	transferase activity, transferring phosphorus-containing groups	396	1632	4781	24075	1.5e-05	0.0068	LOC_Os12g31610	lectin-like protein kinase, putative, expressed
D or OD	>=3	SBP	GO:0016772	F	transferase activity, transferring phosphorus-containing groups	396	1632	4781	24075	1.5e-05	0.0068	LOC_Os01g10870	CAMK_KIN1/SNF1/Nim1_like.7 - CAMK includes calcium/calmodulin depedent protein kinases, expressed
D or OD	>=3	SBP	GO:0016772	F	transferase activity, transferring phosphorus-containing groups	396	1632	4781	24075	1.5e-05	0.0068	LOC_Os08g29540	retrotransposon protein, putative, unclassified, expressed
D or OD	>=3	SBP	GO:0016772	F	transferase activity, transferring phosphorus-containing groups	396	1632	4781	24075	1.5e-05	0.0068	LOC_Os01g68410	retrotransposon protein, putative, Ty3-gypsy subclass, expressed
D or OD	>=3	SBP	GO:0016772	F	transferase activity, transferring phosphorus-containing groups	396	1632	4781	24075	1.5e-05	0.0068	LOC_Os06g39890	retrotransposon protein, putative, unclassified, expressed
D or OD	>=3	SBP	GO:0016772	F	transferase activity, transferring phosphorus-containing groups	396	1632	4781	24075	1.5e-05	0.0068	LOC_Os07g25040	retrotransposon protein, putative, Ty3-gypsy subclass, expressed
D or OD	>=3	SBP	GO:0016772	F	transferase activity, transferring phosphorus-containing groups	396	1632	4781	24075	1.5e-05	0.0068	LOC_Os03g03250	retrotransposon protein, putative, Ty3-gypsy subclass, expressed
D or OD	>=3	SBP	GO:0016772	F	transferase activity, transferring phosphorus-containing groups	396	1632	4781	24075	1.5e-05	0.0068	LOC_Os01g58570	retrotransposon protein, putative, Ty3-gypsy subclass, expressed
D or OD	>=3	SBP	GO:0016772	F	transferase activity, transferring phosphorus-containing groups	396	1632	4781	24075	1.5e-05	0.0068	LOC_Os06g39020	retrotransposon protein, putative, unclassified, expressed
D or OD	>=3	SBP	GO:0016772	F	transferase activity, transferring phosphorus-containing groups	396	1632	4781	24075	1.5e-05	0.0068	LOC_Os01g60380	retrotransposon protein, putative, Ty3-gypsy subclass, expressed
D or OD	>=3	SBP	GO:0016772	F	transferase activity, transferring phosphorus-containing groups	396	1632	4781	24075	1.5e-05	0.0068	LOC_Os08g38940	retrotransposon protein, putative, Ty3-gypsy subclass, expressed
D or OD	>=3	SBP	GO:0016772	F	transferase activity, transferring phosphorus-containing groups	396	1632	4781	24075	1.5e-05	0.0068	LOC_Os02g43740	AGC_PVPK_like_kin82y.6 - ACG kinases include homologs to PKA, PKG and PKC, expressed
D or OD	>=3	SBP	GO:0016772	F	transferase activity, transferring phosphorus-containing groups	396	1632	4781	24075	1.5e-05	0.0068	LOC_Os03g26760	retrotransposon protein, putative, Ty3-gypsy subclass, expressed
D or OD	>=3	SBP	GO:0016772	F	transferase activity, transferring phosphorus-containing groups	396	1632	4781	24075	1.5e-05	0.0068	LOC_Os01g60220	transposon protein, putative, unclassified, expressed
D or OD	>=3	SBP	GO:0016772	F	transferase activity, transferring phosphorus-containing groups	396	1632	4781	24075	1.5e-05	0.0068	LOC_Os04g29140	retrotransposon protein, putative, unclassified
D or OD	>=3	SBP	GO:0016772	F	transferase activity, transferring phosphorus-containing groups	396	1632	4781	24075	1.5e-05	0.0068	LOC_Os10g11672	retrotransposon protein, putative, Ty3-gypsy subclass, expressed
D or OD	>=3	SBP	GO:0016772	F	transferase activity, transferring phosphorus-containing groups	396	1632	4781	24075	1.5e-05	0.0068	LOC_Os07g23050	retrotransposon protein, putative, unclassified, expressed
D or OD	>=3	SBP	GO:0016772	F	transferase activity, transferring phosphorus-containing groups	396	1632	4781	24075	1.5e-05	0.0068	LOC_Os08g24650	retrotransposon protein, putative, Ty3-gypsy subclass, expressed
D or OD	>=3	SBP	GO:0016772	F	transferase activity, transferring phosphorus-containing groups	396	1632	4781	24075	1.5e-05	0.0068	LOC_Os08g24060	retrotransposon protein, putative, unclassified
D or OD	>=3	SBP	GO:0016772	F	transferase activity, transferring phosphorus-containing groups	396	1632	4781	24075	1.5e-05	0.0068	LOC_Os09g19510	senescence-induced receptor-like serine/threonine-protein kinase precursor, putative, expressed
D or OD	>=3	SBP	GO:0016772	F	transferase activity, transferring phosphorus-containing groups	396	1632	4781	24075	1.5e-05	0.0068	LOC_Os04g06080	retrotransposon protein, putative, Ty3-gypsy subclass, expressed
D or OD	>=3	SBP	GO:0016772	F	transferase activity, transferring phosphorus-containing groups	396	1632	4781	24075	1.5e-05	0.0068	LOC_Os07g25340	retrotransposon protein, putative, unclassified, expressed
D or OD	>=3	SBP	GO:0016772	F	transferase activity, transferring phosphorus-containing groups	396	1632	4781	24075	1.5e-05	0.0068	LOC_Os01g59230	retrotransposon protein, putative, unclassified, expressed
D or OD	>=3	SBP	GO:0016772	F	transferase activity, transferring phosphorus-containing groups	396	1632	4781	24075	1.5e-05	0.0068	LOC_Os07g24440	retrotransposon protein, putative, Ty3-gypsy subclass, expressed
D or OD	>=3	SBP	GO:0016772	F	transferase activity, transferring phosphorus-containing groups	396	1632	4781	24075	1.5e-05	0.0068	LOC_Os12g32420	retrotransposon protein, putative, unclassified, expressed
D or OD	>=3	SBP	GO:0016772	F	transferase activity, transferring phosphorus-containing groups	396	1632	4781	24075	1.5e-05	0.0068	LOC_Os07g33260	transposon protein, putative, unclassified, expressed
D or OD	>=3	SBP	GO:0016772	F	transferase activity, transferring phosphorus-containing groups	396	1632	4781	24075	1.5e-05	0.0068	LOC_Os01g02440	Ser/Thr receptor-like kinase, putative, expressed
D or OD	>=3	SBP	GO:0016772	F	transferase activity, transferring phosphorus-containing groups	396	1632	4781	24075	1.5e-05	0.0068	LOC_Os01g59580	retrotransposon protein, putative, unclassified, expressed
D or OD	>=3	SBP	GO:0016772	F	transferase activity, transferring phosphorus-containing groups	396	1632	4781	24075	1.5e-05	0.0068	LOC_Os07g38250	expressed protein
D or OD	>=3	SBP	GO:0016772	F	transferase activity, transferring phosphorus-containing groups	396	1632	4781	24075	1.5e-05	0.0068	LOC_Os06g51170	serine/threonine-protein kinase Cx32, chloroplast precursor, putative, expressed
D or OD	>=3	SBP	GO:0016772	F	transferase activity, transferring phosphorus-containing groups	396	1632	4781	24075	1.5e-05	0.0068	LOC_Os06g38130	his Kinase A domain containing protein, expressed
D or OD	>=3	SBP	GO:0016772	F	transferase activity, transferring phosphorus-containing groups	396	1632	4781	24075	1.5e-05	0.0068	LOC_Os01g12430	receptor-like protein kinase, putative, expressed
D or OD	>=3	SBP	GO:0016772	F	transferase activity, transferring phosphorus-containing groups	396	1632	4781	24075	1.5e-05	0.0068	LOC_Os07g24590	retrotransposon protein, putative, unclassified, expressed
D or OD	>=3	SBP	GO:0016772	F	transferase activity, transferring phosphorus-containing groups	396	1632	4781	24075	1.5e-05	0.0068	LOC_Os03g03280	TKL_IRAK_CrRLK1L-1.6 - The CrRLK1L-1 subfamily has homology to the CrRLK1L homolog, expressed
D or OD	>=3	SBP	GO:0016772	F	transferase activity, transferring phosphorus-containing groups	396	1632	4781	24075	1.5e-05	0.0068	LOC_Os11g25280	retrotransposon protein, putative, unclassified
D or OD	>=3	SBP	GO:0016772	F	transferase activity, transferring phosphorus-containing groups	396	1632	4781	24075	1.5e-05	0.0068	LOC_Os09g19140	senescence-induced receptor-like serine/threonine-protein kinase precursor, putative, expressed
D or OD	>=3	SBP	GO:0016772	F	transferase activity, transferring phosphorus-containing groups	396	1632	4781	24075	1.5e-05	0.0068	LOC_Os04g06144	retrotransposon protein, putative, Ty3-gypsy subclass, expressed
D or OD	>=3	SBP	GO:0016772	F	transferase activity, transferring phosphorus-containing groups	396	1632	4781	24075	1.5e-05	0.0068	LOC_Os03g35700	retrotransposon protein, putative, Ty3-gypsy subclass
D or OD	>=3	SBP	GO:0016772	F	transferase activity, transferring phosphorus-containing groups	396	1632	4781	24075	1.5e-05	0.0068	LOC_Os04g04330	receptor-like protein kinase 2 precursor, putative, expressed
D or OD	>=3	SBP	GO:0016772	F	transferase activity, transferring phosphorus-containing groups	396	1632	4781	24075	1.5e-05	0.0068	LOC_Os08g24560	retrotransposon protein, putative, Ty3-gypsy subclass, expressed
D or OD	>=3	SBP	GO:0016772	F	transferase activity, transferring phosphorus-containing groups	396	1632	4781	24075	1.5e-05	0.0068	LOC_Os08g24730	retrotransposon protein, putative, unclassified, expressed
D or OD	>=3	SBP	GO:0016772	F	transferase activity, transferring phosphorus-containing groups	396	1632	4781	24075	1.5e-05	0.0068	LOC_Os01g02530	retrotransposon protein, putative, unclassified, expressed
D or OD	>=3	SBP	GO:0016772	F	transferase activity, transferring phosphorus-containing groups	396	1632	4781	24075	1.5e-05	0.0068	LOC_Os01g11920	retrotransposon protein, putative, unclassified, expressed
D or OD	>=3	SBP	GO:0016772	F	transferase activity, transferring phosphorus-containing groups	396	1632	4781	24075	1.5e-05	0.0068	LOC_Os09g07420	retrotransposon protein, putative, unclassified, expressed
D or OD	>=3	SBP	GO:0016772	F	transferase activity, transferring phosphorus-containing groups	396	1632	4781	24075	1.5e-05	0.0068	LOC_Os06g50270	retrotransposon protein, putative, Ty3-gypsy subclass, expressed
D or OD	>=3	SBP	GO:0016772	F	transferase activity, transferring phosphorus-containing groups	396	1632	4781	24075	1.5e-05	0.0068	LOC_Os01g02430	TAK14, putative, expressed
D or OD	>=3	SBP	GO:0016772	F	transferase activity, transferring phosphorus-containing groups	396	1632	4781	24075	1.5e-05	0.0068	LOC_Os06g42980	retrotransposon protein, putative, unclassified, expressed
D or OD	>=3	SBP	GO:0016772	F	transferase activity, transferring phosphorus-containing groups	396	1632	4781	24075	1.5e-05	0.0068	LOC_Os01g10450	protein kinase domain containing protein, expressed
D or OD	>=3	SBP	GO:0016772	F	transferase activity, transferring phosphorus-containing groups	396	1632	4781	24075	1.5e-05	0.0068	LOC_Os06g50190	retrotransposon protein, putative, unclassified, expressed
D or OD	>=3	SBP	GO:0016772	F	transferase activity, transferring phosphorus-containing groups	396	1632	4781	24075	1.5e-05	0.0068	LOC_Os06g40260	retrotransposon protein, putative, Ty3-gypsy subclass, expressed
D or OD	>=3	SBP	GO:0016772	F	transferase activity, transferring phosphorus-containing groups	396	1632	4781	24075	1.5e-05	0.0068	LOC_Os07g38800	lectin-like receptor kinase, putative, expressed
D or OD	>=3	SBP	GO:0016772	F	transferase activity, transferring phosphorus-containing groups	396	1632	4781	24075	1.5e-05	0.0068	LOC_Os03g35454	retrotransposon protein, putative, unclassified, expressed
D or OD	>=3	SBP	GO:0016772	F	transferase activity, transferring phosphorus-containing groups	396	1632	4781	24075	1.5e-05	0.0068	LOC_Os12g33600	expressed protein
D or OD	>=3	SBP	GO:0016772	F	transferase activity, transferring phosphorus-containing groups	396	1632	4781	24075	1.5e-05	0.0068	LOC_Os06g42800	STRUBBELIG-RECEPTOR FAMILY 8 precursor, putative, expressed
D or OD	>=3	SBP	GO:0016772	F	transferase activity, transferring phosphorus-containing groups	396	1632	4781	24075	1.5e-05	0.0068	LOC_Os03g03210	retrotransposon protein, putative, Ty3-gypsy subclass, expressed
D or OD	>=3	SBP	GO:0016772	F	transferase activity, transferring phosphorus-containing groups	396	1632	4781	24075	1.5e-05	0.0068	LOC_Os06g39990	retrotransposon protein, putative, unclassified, expressed
D or OD	>=3	SBP	GO:0016772	F	transferase activity, transferring phosphorus-containing groups	396	1632	4781	24075	1.5e-05	0.0068	LOC_Os09g07060	retrotransposon protein, putative, unclassified, expressed
D or OD	>=3	SBP	GO:0016772	F	transferase activity, transferring phosphorus-containing groups	396	1632	4781	24075	1.5e-05	0.0068	LOC_Os08g24310	receptor-like protein kinase precursor, putative, expressed
D or OD	>=3	SBP	GO:0016772	F	transferase activity, transferring phosphorus-containing groups	396	1632	4781	24075	1.5e-05	0.0068	LOC_Os06g41500	D-mannose binding lectin family protein, expressed
D or OD	>=3	SBP	GO:0016772	F	transferase activity, transferring phosphorus-containing groups	396	1632	4781	24075	1.5e-05	0.0068	LOC_Os01g42294	inactive receptor kinase At2g26730 precursor, putative, expressed
D or OD	>=3	SBP	GO:0016772	F	transferase activity, transferring phosphorus-containing groups	396	1632	4781	24075	1.5e-05	0.0068	LOC_Os07g24700	retrotransposon protein, putative, Ty3-gypsy subclass, expressed
D or OD	>=3	SBP	GO:0016772	F	transferase activity, transferring phosphorus-containing groups	396	1632	4781	24075	1.5e-05	0.0068	LOC_Os02g44070	retrotransposon protein, putative, unclassified, expressed
D or OD	>=3	SBP	GO:0016772	F	transferase activity, transferring phosphorus-containing groups	396	1632	4781	24075	1.5e-05	0.0068	LOC_Os01g23020	retrotransposon protein, putative, Ty3-gypsy subclass, expressed
D or OD	>=3	SBP	GO:0016772	F	transferase activity, transferring phosphorus-containing groups	396	1632	4781	24075	1.5e-05	0.0068	LOC_Os06g06960	S-locus-like receptor protein kinase, putative, expressed
D or OD	>=3	SBP	GO:0016772	F	transferase activity, transferring phosphorus-containing groups	396	1632	4781	24075	1.5e-05	0.0068	LOC_Os09g34300	Inositol 1, 3, 4-trisphosphate 5/6-kinase, putative, expressed
D or OD	>=3	SBP	GO:0016772	F	transferase activity, transferring phosphorus-containing groups	396	1632	4781	24075	1.5e-05	0.0068	LOC_Os03g24360	transposon protein, putative, unclassified, expressed
D or OD	>=3	SBP	GO:0016772	F	transferase activity, transferring phosphorus-containing groups	396	1632	4781	24075	1.5e-05	0.0068	LOC_Os08g24990	retrotransposon protein, putative, Ty3-gypsy subclass, expressed
D or OD	>=3	SBP	GO:0016772	F	transferase activity, transferring phosphorus-containing groups	396	1632	4781	24075	1.5e-05	0.0068	LOC_Os12g33700	retrotransposon protein, putative, Ty3-gypsy subclass, expressed
D or OD	>=3	SBP	GO:0016772	F	transferase activity, transferring phosphorus-containing groups	396	1632	4781	24075	1.5e-05	0.0068	LOC_Os07g25010	retrotransposon protein, putative, Ty3-gypsy subclass, expressed
D or OD	>=3	SBP	GO:0016772	F	transferase activity, transferring phosphorus-containing groups	396	1632	4781	24075	1.5e-05	0.0068	LOC_Os06g47750	phytosulfokine receptor precursor, putative, expressed
D or OD	>=3	SBP	GO:0016772	F	transferase activity, transferring phosphorus-containing groups	396	1632	4781	24075	1.5e-05	0.0068	LOC_Os08g24220	retrotransposon protein, putative, Ty3-gypsy subclass, expressed
D or OD	>=3	SBP	GO:0016772	F	transferase activity, transferring phosphorus-containing groups	396	1632	4781	24075	1.5e-05	0.0068	LOC_Os06g49170	OsWAK64 - OsWAK receptor-like protein kinase, expressed
D or OD	>=3	SBP	GO:0016772	F	transferase activity, transferring phosphorus-containing groups	396	1632	4781	24075	1.5e-05	0.0068	LOC_Os02g44180	retrotransposon protein, putative, Ty3-gypsy subclass, expressed
D or OD	>=3	SBP	GO:0016772	F	transferase activity, transferring phosphorus-containing groups	396	1632	4781	24075	1.5e-05	0.0068	LOC_Os01g12400	S-locus lectin protein kinase family protein, putative, expressed
D or OD	>=3	SBP	GO:0016772	F	transferase activity, transferring phosphorus-containing groups	396	1632	4781	24075	1.5e-05	0.0068	LOC_Os03g33250	retrotransposon protein, putative, Ty3-gypsy subclass, expressed
D or OD	>=3	SBP	GO:0016772	F	transferase activity, transferring phosphorus-containing groups	396	1632	4781	24075	1.5e-05	0.0068	LOC_Os07g24400	retrotransposon protein, putative, Ty3-gypsy subclass, expressed
D or OD	>=3	SBP	GO:0016772	F	transferase activity, transferring phosphorus-containing groups	396	1632	4781	24075	1.5e-05	0.0068	LOC_Os01g02560	Ser/Thr receptor-like kinase, putative, expressed
D or OD	>=3	SBP	GO:0016772	F	transferase activity, transferring phosphorus-containing groups	396	1632	4781	24075	1.5e-05	0.0068	LOC_Os04g06360	retrotransposon protein, putative, Ty3-gypsy subclass, expressed
D or OD	>=3	SBP	GO:0016772	F	transferase activity, transferring phosphorus-containing groups	396	1632	4781	24075	1.5e-05	0.0068	LOC_Os02g44000	amino acid kinase, putative, expressed
D or OD	>=3	SBP	GO:0016772	F	transferase activity, transferring phosphorus-containing groups	396	1632	4781	24075	1.5e-05	0.0068	LOC_Os02g43906	ceramide kinase-related, putative, expressed
D or OD	>=3	SBP	GO:0016772	F	transferase activity, transferring phosphorus-containing groups	396	1632	4781	24075	1.5e-05	0.0068	LOC_Os01g58790	GHMP kinases ATP-binding protein, putative, expressed
D or OD	>=3	SBP	GO:0016772	F	transferase activity, transferring phosphorus-containing groups	396	1632	4781	24075	1.5e-05	0.0068	LOC_Os03g28300	protein kinase domain containing protein, expressed
D or OD	>=3	SBP	GO:0016772	F	transferase activity, transferring phosphorus-containing groups	396	1632	4781	24075	1.5e-05	0.0068	LOC_Os06g38730	receptor-like protein kinase precursor, putative, expressed
D or OD	>=3	SBP	GO:0016772	F	transferase activity, transferring phosphorus-containing groups	396	1632	4781	24075	1.5e-05	0.0068	LOC_Os03g03400	diacylglycerol kinase, putative, expressed
D or OD	>=3	SBP	GO:0016772	F	transferase activity, transferring phosphorus-containing groups	396	1632	4781	24075	1.5e-05	0.0068	LOC_Os04g29469	retrotransposon protein, putative, unclassified, expressed
D or OD	>=3	SBP	GO:0016772	F	transferase activity, transferring phosphorus-containing groups	396	1632	4781	24075	1.5e-05	0.0068	LOC_Os07g25330	retrotransposon protein, putative, Ty3-gypsy subclass, expressed
D or OD	>=3	SBP	GO:0016772	F	transferase activity, transferring phosphorus-containing groups	396	1632	4781	24075	1.5e-05	0.0068	LOC_Os12g34180	retrotransposon protein, putative, Ty3-gypsy subclass, expressed
D or OD	>=3	SBP	GO:0016772	F	transferase activity, transferring phosphorus-containing groups	396	1632	4781	24075	1.5e-05	0.0068	LOC_Os04g04880	retrotransposon protein, putative, Ty3-gypsy subclass, expressed
D or OD	>=3	SBP	GO:0016772	F	transferase activity, transferring phosphorus-containing groups	396	1632	4781	24075	1.5e-05	0.0068	LOC_Os06g06920	S-locus-like receptor protein kinase, putative, expressed
D or OD	>=3	SBP	GO:0016772	F	transferase activity, transferring phosphorus-containing groups	396	1632	4781	24075	1.5e-05	0.0068	LOC_Os06g39310	retrotransposon protein, putative, unclassified
D or OD	>=3	SBP	GO:0016772	F	transferase activity, transferring phosphorus-containing groups	396	1632	4781	24075	1.5e-05	0.0068	LOC_Os01g60280	ATP binding protein, putative, expressed
D or OD	>=3	SBP	GO:0016772	F	transferase activity, transferring phosphorus-containing groups	396	1632	4781	24075	1.5e-05	0.0068	LOC_Os01g59550	senescence-induced receptor-like serine/threonine-protein kinase precursor, putative, expressed
D or OD	>=3	SBP	GO:0016772	F	transferase activity, transferring phosphorus-containing groups	396	1632	4781	24075	1.5e-05	0.0068	LOC_Os06g38670	receptor-like protein kinase precursor, putative, expressed
D or OD	>=3	SBP	GO:0016772	F	transferase activity, transferring phosphorus-containing groups	396	1632	4781	24075	1.5e-05	0.0068	LOC_Os12g16050	retrotransposon protein, putative, Ty3-gypsy subclass, expressed
D or OD	>=3	SBP	GO:0016772	F	transferase activity, transferring phosphorus-containing groups	396	1632	4781	24075	1.5e-05	0.0068	LOC_Os06g43340	retrotransposon protein, putative, unclassified, expressed
D or OD	>=3	SBP	GO:0016772	F	transferase activity, transferring phosphorus-containing groups	396	1632	4781	24075	1.5e-05	0.0068	LOC_Os03g27140	retrotransposon protein, putative, unclassified, expressed
D or OD	>=3	SBP	GO:0016772	F	transferase activity, transferring phosphorus-containing groups	396	1632	4781	24075	1.5e-05	0.0068	LOC_Os07g23840	retrotransposon protein, putative, unclassified, expressed
D or OD	>=3	SBP	GO:0016772	F	transferase activity, transferring phosphorus-containing groups	396	1632	4781	24075	1.5e-05	0.0068	LOC_Os06g38490	retrotransposon protein, putative, unclassified, expressed
D or OD	>=3	SBP	GO:0016772	F	transferase activity, transferring phosphorus-containing groups	396	1632	4781	24075	1.5e-05	0.0068	LOC_Os02g44410	retrotransposon protein, putative, unclassified, expressed
D or OD	>=3	SBP	GO:0016772	F	transferase activity, transferring phosphorus-containing groups	396	1632	4781	24075	1.5e-05	0.0068	LOC_Os07g17630	retrotransposon protein, putative, Ty3-gypsy subclass, expressed
D or OD	>=3	SBP	GO:0016772	F	transferase activity, transferring phosphorus-containing groups	396	1632	4781	24075	1.5e-05	0.0068	LOC_Os04g05370	retrotransposon protein, putative, unclassified, expressed
D or OD	>=3	SBP	GO:0016772	F	transferase activity, transferring phosphorus-containing groups	396	1632	4781	24075	1.5e-05	0.0068	LOC_Os01g10700	D-mannose binding lectin family protein, expressed
D or OD	>=3	SBP	GO:0016772	F	transferase activity, transferring phosphorus-containing groups	396	1632	4781	24075	1.5e-05	0.0068	LOC_Os07g04190	receptor protein kinase CLAVATA1 precursor, putative, expressed
D or OD	>=3	SBP	GO:0016772	F	transferase activity, transferring phosphorus-containing groups	396	1632	4781	24075	1.5e-05	0.0068	LOC_Os09g33910	CAMK_CAMK_like.39 - CAMK includes calcium/calmodulin depedent protein kinases, expressed
D or OD	>=3	SBP	GO:0016772	F	transferase activity, transferring phosphorus-containing groups	396	1632	4781	24075	1.5e-05	0.0068	LOC_Os07g24990	retrotransposon protein, putative, Ty3-gypsy subclass, expressed
D or OD	>=3	SBP	GO:0016772	F	transferase activity, transferring phosphorus-containing groups	396	1632	4781	24075	1.5e-05	0.0068	LOC_Os01g10840	CGMC_GSK.2 - CGMC includes CDA, MAPK, GSK3, and CLKC kinases, expressed
D or OD	>=3	SBP	GO:0016772	F	transferase activity, transferring phosphorus-containing groups	396	1632	4781	24075	1.5e-05	0.0068	LOC_Os12g31560	protein kinase, putative, expressed
D or OD	>=3	SBP	GO:0016772	F	transferase activity, transferring phosphorus-containing groups	396	1632	4781	24075	1.5e-05	0.0068	LOC_Os08g29490	retrotransposon protein, putative, unclassified, expressed
D or OD	>=3	SBP	GO:0016772	F	transferase activity, transferring phosphorus-containing groups	396	1632	4781	24075	1.5e-05	0.0068	LOC_Os04g06000	transposon protein, putative, CACTA, En/Spm sub-class, expressed
D or OD	>=3	SBP	GO:0016772	F	transferase activity, transferring phosphorus-containing groups	396	1632	4781	24075	1.5e-05	0.0068	LOC_Os04g05730	retrotransposon protein, putative, Ty3-gypsy subclass, expressed
D or OD	>=3	SBP	GO:0016772	F	transferase activity, transferring phosphorus-containing groups	396	1632	4781	24075	1.5e-05	0.0068	LOC_Os04g04510	retrotransposon protein, putative, Ty3-gypsy subclass, expressed
D or OD	>=3	SBP	GO:0016772	F	transferase activity, transferring phosphorus-containing groups	396	1632	4781	24075	1.5e-05	0.0068	LOC_Os02g44190	retrotransposon protein, putative, Ty3-gypsy subclass
D or OD	>=3	SBP	GO:0016772	F	transferase activity, transferring phosphorus-containing groups	396	1632	4781	24075	1.5e-05	0.0068	LOC_Os10g11702	retrotransposon protein, putative, Ty3-gypsy subclass, expressed
D or OD	>=3	SBP	GO:0016772	F	transferase activity, transferring phosphorus-containing groups	396	1632	4781	24075	1.5e-05	0.0068	LOC_Os04g04670	protein kinase, putative, expressed
D or OD	>=3	SBP	GO:0016772	F	transferase activity, transferring phosphorus-containing groups	396	1632	4781	24075	1.5e-05	0.0068	LOC_Os01g58610	phosphoglycerate kinase protein, putative, expressed
D or OD	>=3	SBP	GO:0016772	F	transferase activity, transferring phosphorus-containing groups	396	1632	4781	24075	1.5e-05	0.0068	LOC_Os07g24690	retrotransposon protein, putative, unclassified, expressed
D or OD	>=3	SBP	GO:0016772	F	transferase activity, transferring phosphorus-containing groups	396	1632	4781	24075	1.5e-05	0.0068	LOC_Os06g37670	S-locus-like receptor protein kinase, putative, expressed
D or OD	>=3	SBP	GO:0016772	F	transferase activity, transferring phosphorus-containing groups	396	1632	4781	24075	1.5e-05	0.0068	LOC_Os04g06130	retrotransposon protein, putative, Ty3-gypsy subclass, expressed
D or OD	>=3	SBP	GO:0016772	F	transferase activity, transferring phosphorus-containing groups	396	1632	4781	24075	1.5e-05	0.0068	LOC_Os12g15650	retrotransposon protein, putative, Ty3-gypsy subclass, expressed
D or OD	>=3	SBP	GO:0016772	F	transferase activity, transferring phosphorus-containing groups	396	1632	4781	24075	1.5e-05	0.0068	LOC_Os08g24270	retrotransposon protein, putative, Ty3-gypsy subclass, expressed
D or OD	>=3	SBP	GO:0016772	F	transferase activity, transferring phosphorus-containing groups	396	1632	4781	24075	1.5e-05	0.0068	LOC_Os06g40030	S-locus-like receptor protein kinase, putative, expressed
D or OD	>=3	SBP	GO:0016772	F	transferase activity, transferring phosphorus-containing groups	396	1632	4781	24075	1.5e-05	0.0068	LOC_Os09g31210	AGC_PVPK_like_CDK8.1 - ACG kinases include homologs to PKA, PKG and PKC, expressed
D or OD	>=3	SBP	GO:0016772	F	transferase activity, transferring phosphorus-containing groups	396	1632	4781	24075	1.5e-05	0.0068	LOC_Os06g37690	S-locus-like receptor protein kinase, putative, expressed
D or OD	>=3	SBP	GO:0016772	F	transferase activity, transferring phosphorus-containing groups	396	1632	4781	24075	1.5e-05	0.0068	LOC_Os04g05200	retrotransposon protein, putative, Ty3-gypsy subclass, expressed
D or OD	>=3	SBP	GO:0016772	F	transferase activity, transferring phosphorus-containing groups	396	1632	4781	24075	1.5e-05	0.0068	LOC_Os11g25350	retrotransposon protein, putative, unclassified
D or OD	>=3	SBP	GO:0016772	F	transferase activity, transferring phosphorus-containing groups	396	1632	4781	24075	1.5e-05	0.0068	LOC_Os08g24630	protein kinase domain containing protein, expressed
D or OD	>=3	SBP	GO:0016772	F	transferase activity, transferring phosphorus-containing groups	396	1632	4781	24075	1.5e-05	0.0068	LOC_Os04g24220	OsWAK32 - OsWAK receptor-like protein kinase, expressed
D or OD	>=3	SBP	GO:0016772	F	transferase activity, transferring phosphorus-containing groups	396	1632	4781	24075	1.5e-05	0.0068	LOC_Os06g38100	S-locus-like receptor protein kinase, putative
D or OD	>=3	SBP	GO:0016772	F	transferase activity, transferring phosphorus-containing groups	396	1632	4781	24075	1.5e-05	0.0068	LOC_Os12g33100	guanylate kinase, putative, expressed
D or OD	>=3	SBP	GO:0016772	F	transferase activity, transferring phosphorus-containing groups	396	1632	4781	24075	1.5e-05	0.0068	LOC_Os12g16150	retrotransposon protein, putative, Ty3-gypsy subclass, expressed
D or OD	>=3	SBP	GO:0016772	F	transferase activity, transferring phosphorus-containing groups	396	1632	4781	24075	1.5e-05	0.0068	LOC_Os09g19229	protein kinase domain containing protein, expressed
D or OD	>=3	SBP	GO:0016772	F	transferase activity, transferring phosphorus-containing groups	396	1632	4781	24075	1.5e-05	0.0068	LOC_Os10g22010	retrotransposon protein, putative, unclassified, expressed
D or OD	>=3	SBP	GO:0016772	F	transferase activity, transferring phosphorus-containing groups	396	1632	4781	24075	1.5e-05	0.0068	LOC_Os06g49950	retrotransposon protein, putative, unclassified, expressed
D or OD	>=3	SBP	GO:0016772	F	transferase activity, transferring phosphorus-containing groups	396	1632	4781	24075	1.5e-05	0.0068	LOC_Os03g39450	retrotransposon protein, putative, Ty3-gypsy subclass, expressed
D or OD	>=3	SBP	GO:0016772	F	transferase activity, transferring phosphorus-containing groups	396	1632	4781	24075	1.5e-05	0.0068	LOC_Os07g38640	inactive receptor kinase At2g26730 precursor, putative, expressed
D or OD	>=3	SBP	GO:0016772	F	transferase activity, transferring phosphorus-containing groups	396	1632	4781	24075	1.5e-05	0.0068	LOC_Os03g35740	retrotransposon protein, putative, Ty3-gypsy subclass, expressed
D or OD	>=3	SBP	GO:0016772	F	transferase activity, transferring phosphorus-containing groups	396	1632	4781	24075	1.5e-05	0.0068	LOC_Os03g15620	retrotransposon protein, putative, unclassified, expressed
D or OD	>=3	SBP	GO:0016772	F	transferase activity, transferring phosphorus-containing groups	396	1632	4781	24075	1.5e-05	0.0068	LOC_Os06g41510	D-mannose binding lectin family protein, expressed
D or OD	>=3	SBP	GO:0016772	F	transferase activity, transferring phosphorus-containing groups	396	1632	4781	24075	1.5e-05	0.0068	LOC_Os07g38320	retrotransposon protein, putative, Ty3-gypsy subclass
D or OD	>=3	SBP	GO:0016772	F	transferase activity, transferring phosphorus-containing groups	396	1632	4781	24075	1.5e-05	0.0068	LOC_Os01g02420	protein kinase domain containing protein, expressed
D or OD	>=3	SBP	GO:0016772	F	transferase activity, transferring phosphorus-containing groups	396	1632	4781	24075	1.5e-05	0.0068	LOC_Os04g04914	retrotransposon protein, putative, unclassified, expressed
D or OD	>=3	SBP	GO:0016772	F	transferase activity, transferring phosphorus-containing groups	396	1632	4781	24075	1.5e-05	0.0068	LOC_Os01g02390	protein kinase domain containing protein, expressed
D or OD	>=3	SBP	GO:0016772	F	transferase activity, transferring phosphorus-containing groups	396	1632	4781	24075	1.5e-05	0.0068	LOC_Os04g29424	retrotransposon protein, putative, LINE subclass, expressed
D or OD	>=3	SBP	GO:0016772	F	transferase activity, transferring phosphorus-containing groups	396	1632	4781	24075	1.5e-05	0.0068	LOC_Os01g23550	retrotransposon protein, putative, unclassified, expressed
D or OD	>=3	SBP	GO:0016772	F	transferase activity, transferring phosphorus-containing groups	396	1632	4781	24075	1.5e-05	0.0068	LOC_Os12g15870	retrotransposon protein, putative, unclassified, expressed
D or OD	>=3	SBP	GO:0016772	F	transferase activity, transferring phosphorus-containing groups	396	1632	4781	24075	1.5e-05	0.0068	LOC_Os07g38810	lectin receptor-type protein kinase, putative, expressed
D or OD	>=3	SBP	GO:0016772	F	transferase activity, transferring phosphorus-containing groups	396	1632	4781	24075	1.5e-05	0.0068	LOC_Os12g33956	maturase, putative, expressed
D or OD	>=3	SBP	GO:0016772	F	transferase activity, transferring phosphorus-containing groups	396	1632	4781	24075	1.5e-05	0.0068	LOC_Os04g29350	retrotransposon protein, putative, unclassified, expressed
D or OD	>=3	SBP	GO:0016772	F	transferase activity, transferring phosphorus-containing groups	396	1632	4781	24075	1.5e-05	0.0068	LOC_Os07g25090	retrotransposon protein, putative, Ty3-gypsy subclass, expressed
D or OD	>=3	SBP	GO:0016772	F	transferase activity, transferring phosphorus-containing groups	396	1632	4781	24075	1.5e-05	0.0068	LOC_Os03g39250	retrotransposon protein, putative, Ty3-gypsy subclass, expressed
D or OD	>=3	SBP	GO:0016772	F	transferase activity, transferring phosphorus-containing groups	396	1632	4781	24075	1.5e-05	0.0068	LOC_Os02g44124	retrotransposon protein, putative, unclassified, expressed
D or OD	>=3	SBP	GO:0016772	F	transferase activity, transferring phosphorus-containing groups	396	1632	4781	24075	1.5e-05	0.0068	LOC_Os01g10720	retrotransposon protein, putative, unclassified, expressed
D or OD	>=3	SBP	GO:0016772	F	transferase activity, transferring phosphorus-containing groups	396	1632	4781	24075	1.5e-05	0.0068	LOC_Os03g02350	transposon protein, putative, unclassified, expressed
D or OD	>=3	SBP	GO:0016772	F	transferase activity, transferring phosphorus-containing groups	396	1632	4781	24075	1.5e-05	0.0068	LOC_Os10g34640	retrotransposon protein, putative, unclassified
D or OD	>=3	SBP	GO:0016772	F	transferase activity, transferring phosphorus-containing groups	396	1632	4781	24075	1.5e-05	0.0068	LOC_Os12g15570	retrotransposon protein, putative, unclassified, expressed
D or OD	>=3	SBP	GO:0016772	F	transferase activity, transferring phosphorus-containing groups	396	1632	4781	24075	1.5e-05	0.0068	LOC_Os04g05670	retrotransposon protein, putative, Ty3-gypsy subclass, expressed
D or OD	>=3	SBP	GO:0016772	F	transferase activity, transferring phosphorus-containing groups	396	1632	4781	24075	1.5e-05	0.0068	LOC_Os11g18600	retrotransposon protein, putative, Ty3-gypsy subclass, expressed
D or OD	>=3	SBP	GO:0016772	F	transferase activity, transferring phosphorus-containing groups	396	1632	4781	24075	1.5e-05	0.0068	LOC_Os12g32800	retrotransposon protein, putative, Ty3-gypsy subclass, expressed
D or OD	>=3	SBP	GO:0016772	F	transferase activity, transferring phosphorus-containing groups	396	1632	4781	24075	1.5e-05	0.0068	LOC_Os07g22950	adenylate kinase isoenzyme 6, putative, expressed
D or OD	>=3	SBP	GO:0016772	F	transferase activity, transferring phosphorus-containing groups	396	1632	4781	24075	1.5e-05	0.0068	LOC_Os08g29420	retrotransposon protein, putative, Ty3-gypsy subclass, expressed
D or OD	>=3	SBP	GO:0016772	F	transferase activity, transferring phosphorus-containing groups	396	1632	4781	24075	1.5e-05	0.0068	LOC_Os07g22550	retrotransposon protein, putative, Ty3-gypsy subclass, expressed
D or OD	>=3	SBP	GO:0016772	F	transferase activity, transferring phosphorus-containing groups	396	1632	4781	24075	1.5e-05	0.0068	LOC_Os01g58710	retrotransposon protein, putative, Ty3-gypsy subclass, expressed
D or OD	>=3	SBP	GO:0016772	F	transferase activity, transferring phosphorus-containing groups	396	1632	4781	24075	1.5e-05	0.0068	LOC_Os07g22410	retrotransposon protein, putative, Ty3-gypsy subclass, expressed
D or OD	>=3	SBP	GO:0016772	F	transferase activity, transferring phosphorus-containing groups	396	1632	4781	24075	1.5e-05	0.0068	LOC_Os06g49430	CGMC_MAPKCMGC_2.11 - CGMC includes CDA, MAPK, GSK3, and CLKC kinases, expressed
D or OD	>=3	SBP	GO:0016772	F	transferase activity, transferring phosphorus-containing groups	396	1632	4781	24075	1.5e-05	0.0068	LOC_Os06g50030	CAMK_CAMK_like.30 - CAMK includes calcium/calmodulin depedent protein kinases, expressed
D or OD	>=3	SBP	GO:0016772	F	transferase activity, transferring phosphorus-containing groups	396	1632	4781	24075	1.5e-05	0.0068	LOC_Os03g33140	retrotransposon protein, putative, Ty3-gypsy subclass, expressed
D or OD	>=3	SBP	GO:0016772	F	transferase activity, transferring phosphorus-containing groups	396	1632	4781	24075	1.5e-05	0.0068	LOC_Os01g59140	DNA-directed RNA polymerases I, II, and III subunit RPABC1, putative, expressed
D or OD	>=3	SBP	GO:0016772	F	transferase activity, transferring phosphorus-containing groups	396	1632	4781	24075	1.5e-05	0.0068	LOC_Os03g28140	1-phosphatidylinositol-4-phosphate 5-kinase/ zinc ion binding protein, putative, expressed
D or OD	>=3	SBP	GO:0016772	F	transferase activity, transferring phosphorus-containing groups	396	1632	4781	24075	1.5e-05	0.0068	LOC_Os11g24930	retrotransposon protein, putative, Ty3-gypsy subclass, expressed
D or OD	>=3	SBP	GO:0016772	F	transferase activity, transferring phosphorus-containing groups	396	1632	4781	24075	1.5e-05	0.0068	LOC_Os06g49260	OsWAK65 - OsWAK receptor-like protein kinase, expressed
D or OD	>=3	SBP	GO:0016772	F	transferase activity, transferring phosphorus-containing groups	396	1632	4781	24075	1.5e-05	0.0068	LOC_Os08g26920	retrotransposon protein, putative, Ty3-gypsy subclass, expressed
D or OD	>=3	SBP	GO:0016772	F	transferase activity, transferring phosphorus-containing groups	396	1632	4781	24075	1.5e-05	0.0068	LOC_Os02g44642	STE_MEKK_ste11_MAP3K.10 - STE kinases include homologs to sterile 7, sterile 11 and sterile 20 from yeast, expressed
D or OD	>=3	SBP	GO:0016772	F	transferase activity, transferring phosphorus-containing groups	396	1632	4781	24075	1.5e-05	0.0068	LOC_Os01g12410	receptor-like protein kinase, putative, expressed
D or OD	>=3	SBP	GO:0016772	F	transferase activity, transferring phosphorus-containing groups	396	1632	4781	24075	1.5e-05	0.0068	LOC_Os09g19610	retrotransposon protein, putative, unclassified, expressed
D or OD	>=3	SBP	GO:0016772	F	transferase activity, transferring phosphorus-containing groups	396	1632	4781	24075	1.5e-05	0.0068	LOC_Os05g24850	retrotransposon protein, putative, Ty3-gypsy subclass
D or OD	>=3	SBP	GO:0016772	F	transferase activity, transferring phosphorus-containing groups	396	1632	4781	24075	1.5e-05	0.0068	LOC_Os07g38070	protein kinase, putative, expressed
D or OD	>=3	SBP	GO:0016772	F	transferase activity, transferring phosphorus-containing groups	396	1632	4781	24075	1.5e-05	0.0068	LOC_Os07g33110	CAMK_CAMK_like.33 - CAMK includes calcium/calmodulin depedent protein kinases, expressed
D or OD	>=3	SBP	GO:0016772	F	transferase activity, transferring phosphorus-containing groups	396	1632	4781	24075	1.5e-05	0.0068	LOC_Os10g11690	retrotransposon protein, putative, Ty3-gypsy subclass, expressed
D or OD	>=3	SBP	GO:0016772	F	transferase activity, transferring phosphorus-containing groups	396	1632	4781	24075	1.5e-05	0.0068	LOC_Os07g23070	retrotransposon protein, putative, Ty3-gypsy subclass, expressed
D or OD	>=3	SBP	GO:0016772	F	transferase activity, transferring phosphorus-containing groups	396	1632	4781	24075	1.5e-05	0.0068	LOC_Os01g23040	retrotransposon protein, putative, Ty3-gypsy subclass, expressed
D or OD	>=3	SBP	GO:0016772	F	transferase activity, transferring phosphorus-containing groups	396	1632	4781	24075	1.5e-05	0.0068	LOC_Os04g05560	kinase, putative, expressed
D or OD	>=3	SBP	GO:0016772	F	transferase activity, transferring phosphorus-containing groups	396	1632	4781	24075	1.5e-05	0.0068	LOC_Os03g26020	retrotransposon protein, putative, unclassified, expressed
D or OD	>=3	SBP	GO:0016772	F	transferase activity, transferring phosphorus-containing groups	396	1632	4781	24075	1.5e-05	0.0068	LOC_Os02g43912	ceramide kinase-related, putative, expressed
D or OD	>=3	SBP	GO:0016772	F	transferase activity, transferring phosphorus-containing groups	396	1632	4781	24075	1.5e-05	0.0068	LOC_Os04g04720	retrotransposon protein, putative, unclassified, expressed
D or OD	>=3	SBP	GO:0016772	F	transferase activity, transferring phosphorus-containing groups	396	1632	4781	24075	1.5e-05	0.0068	LOC_Os08g24770	protein kinase, putative, expressed
D or OD	>=3	SBP	GO:0016772	F	transferase activity, transferring phosphorus-containing groups	396	1632	4781	24075	1.5e-05	0.0068	LOC_Os06g37720	retrotransposon protein, putative, Ty3-gypsy subclass, expressed
D or OD	>=3	SBP	GO:0016772	F	transferase activity, transferring phosphorus-containing groups	396	1632	4781	24075	1.5e-05	0.0068	LOC_Os12g33000	retrotransposon protein, putative, unclassified, expressed
D or OD	>=3	SBP	GO:0016772	F	transferase activity, transferring phosphorus-containing groups	396	1632	4781	24075	1.5e-05	0.0068	LOC_Os03g03410	serine/threonine-protein kinase, putative, expressed
D or OD	>=3	SBP	GO:0016772	F	transferase activity, transferring phosphorus-containing groups	396	1632	4781	24075	1.5e-05	0.0068	LOC_Os03g02410	GHMP kinases ATP-binding protein, putative, expressed
D or OD	>=3	SBP	GO:0016772	F	transferase activity, transferring phosphorus-containing groups	396	1632	4781	24075	1.5e-05	0.0068	LOC_Os09g19350	expressed protein
D or OD	>=3	SBP	GO:0016772	F	transferase activity, transferring phosphorus-containing groups	396	1632	4781	24075	1.5e-05	0.0068	LOC_Os09g19290	retrotransposon protein, putative, unclassified, expressed
D or OD	>=3	SBP	GO:0016772	F	transferase activity, transferring phosphorus-containing groups	396	1632	4781	24075	1.5e-05	0.0068	LOC_Os01g60330	inactive receptor kinase At2g26730 precursor, putative, expressed
D or OD	>=3	SBP	GO:0016772	F	transferase activity, transferring phosphorus-containing groups	396	1632	4781	24075	1.5e-05	0.0068	LOC_Os04g05330	retrotransposon protein, putative, unclassified, expressed
D or OD	>=3	SBP	GO:0016772	F	transferase activity, transferring phosphorus-containing groups	396	1632	4781	24075	1.5e-05	0.0068	LOC_Os01g02460	receptor kinase LRK10, putative, expressed
D or OD	>=3	SBP	GO:0016772	F	transferase activity, transferring phosphorus-containing groups	396	1632	4781	24075	1.5e-05	0.0068	LOC_Os01g59560	protein kinase domain containing protein, expressed
D or OD	>=3	SBP	GO:0016772	F	transferase activity, transferring phosphorus-containing groups	396	1632	4781	24075	1.5e-05	0.0068	LOC_Os04g06090	cysteine-rich receptor-like protein kinase 37 precursor, putative, expressed
D or OD	>=3	SBP	GO:0016772	F	transferase activity, transferring phosphorus-containing groups	396	1632	4781	24075	1.5e-05	0.0068	LOC_Os09g18594	protein kinase domain containing protein, expressed
D or OD	>=3	SBP	GO:0016772	F	transferase activity, transferring phosphorus-containing groups	396	1632	4781	24075	1.5e-05	0.0068	LOC_Os06g43270	protein kinase domain containing protein, expressed
D or OD	>=3	SBP	GO:0016772	F	transferase activity, transferring phosphorus-containing groups	396	1632	4781	24075	1.5e-05	0.0068	LOC_Os09g06800	retrotransposon protein, putative, Ty3-gypsy subclass, expressed
D or OD	>=3	SBP	GO:0016772	F	transferase activity, transferring phosphorus-containing groups	396	1632	4781	24075	1.5e-05	0.0068	LOC_Os04g04790	expressed protein
D or OD	>=3	SBP	GO:0016772	F	transferase activity, transferring phosphorus-containing groups	396	1632	4781	24075	1.5e-05	0.0068	LOC_Os06g42770	type II intron maturase protein, putative, expressed
D or OD	>=3	SBP	GO:0016772	F	transferase activity, transferring phosphorus-containing groups	396	1632	4781	24075	1.5e-05	0.0068	LOC_Os06g41560	receptor-like protein kinase, putative, expressed
D or OD	>=3	SBP	GO:0016772	F	transferase activity, transferring phosphorus-containing groups	396	1632	4781	24075	1.5e-05	0.0068	LOC_Os12g33910	retrotransposon protein, putative, Ty3-gypsy subclass, expressed
D or OD	>=3	SBP	GO:0016772	F	transferase activity, transferring phosphorus-containing groups	396	1632	4781	24075	1.5e-05	0.0068	LOC_Os03g39350	retrotransposon protein, putative, Ty3-gypsy subclass, expressed
D or OD	>=3	SBP	GO:0016772	F	transferase activity, transferring phosphorus-containing groups	396	1632	4781	24075	1.5e-05	0.0068	LOC_Os06g39820	retrotransposon protein, putative, unclassified, expressed
D or OD	>=3	SBP	GO:0016772	F	transferase activity, transferring phosphorus-containing groups	396	1632	4781	24075	1.5e-05	0.0068	LOC_Os04g29520	retrotransposon protein, putative, unclassified, expressed
D or OD	>=3	SBP	GO:0016772	F	transferase activity, transferring phosphorus-containing groups	396	1632	4781	24075	1.5e-05	0.0068	LOC_Os07g25190	retrotransposon protein, putative, Ty3-gypsy subclass, expressed
D or OD	>=3	SBP	GO:0016772	F	transferase activity, transferring phosphorus-containing groups	396	1632	4781	24075	1.5e-05	0.0068	LOC_Os02g45120	expressed protein
D or OD	>=3	SBP	GO:0016772	F	transferase activity, transferring phosphorus-containing groups	396	1632	4781	24075	1.5e-05	0.0068	LOC_Os03g39560	retrotransposon protein, putative, unclassified, expressed
D or OD	>=3	SBP	GO:0016772	F	transferase activity, transferring phosphorus-containing groups	396	1632	4781	24075	1.5e-05	0.0068	LOC_Os04g04590	retrotransposon protein, putative, Ty3-gypsy subclass, expressed
D or OD	>=3	SBP	GO:0016772	F	transferase activity, transferring phosphorus-containing groups	396	1632	4781	24075	1.5e-05	0.0068	LOC_Os01g58920	retrotransposon protein, putative, Ty3-gypsy subclass, expressed
D or OD	>=3	SBP	GO:0016772	F	transferase activity, transferring phosphorus-containing groups	396	1632	4781	24075	1.5e-05	0.0068	LOC_Os07g25210	retrotransposon protein, putative, Ty3-gypsy subclass, expressed
D or OD	>=3	SBP	GO:0016772	F	transferase activity, transferring phosphorus-containing groups	396	1632	4781	24075	1.5e-05	0.0068	LOC_Os06g50920	protein kinase family protein, putative, expressed
D or OD	>=3	SBP	GO:0016772	F	transferase activity, transferring phosphorus-containing groups	396	1632	4781	24075	1.5e-05	0.0068	LOC_Os04g06244	kinase, putative, expressed
D or OD	>=3	SBP	GO:0016772	F	transferase activity, transferring phosphorus-containing groups	396	1632	4781	24075	1.5e-05	0.0068	LOC_Os08g25110	transposon protein, putative, unclassified, expressed
D or OD	>=3	SBP	GO:0016772	F	transferase activity, transferring phosphorus-containing groups	396	1632	4781	24075	1.5e-05	0.0068	LOC_Os06g06940	S-locus-like receptor protein kinase, putative, expressed
D or OD	>=3	SBP	GO:0016772	F	transferase activity, transferring phosphorus-containing groups	396	1632	4781	24075	1.5e-05	0.0068	LOC_Os07g17620	retrotransposon protein, putative, Ty3-gypsy subclass, expressed
D or OD	>=3	SBP	GO:0016772	F	transferase activity, transferring phosphorus-containing groups	396	1632	4781	24075	1.5e-05	0.0068	LOC_Os04g04940	retrotransposon protein, putative, unclassified, expressed
D or OD	>=3	SBP	GO:0016772	F	transferase activity, transferring phosphorus-containing groups	396	1632	4781	24075	1.5e-05	0.0068	LOC_Os02g44610	protein kinase, putative, expressed
D or OD	>=3	SBP	GO:0016772	F	transferase activity, transferring phosphorus-containing groups	396	1632	4781	24075	1.5e-05	0.0068	LOC_Os01g42400	STE_MEK_ste7_MAP2K.3 - STE kinases include homologs to sterile 7, sterile 11 and sterile 20 from yeast, expressed
D or OD	>=3	SBP	GO:0016772	F	transferase activity, transferring phosphorus-containing groups	396	1632	4781	24075	1.5e-05	0.0068	LOC_Os07g38820	lectin-like receptor kinase, putative, expressed
D or OD	>=3	SBP	GO:0016772	F	transferase activity, transferring phosphorus-containing groups	396	1632	4781	24075	1.5e-05	0.0068	LOC_Os12g31570	retrotransposon protein, putative, Ty3-gypsy subclass
D or OD	>=3	SBP	GO:0016772	F	transferase activity, transferring phosphorus-containing groups	396	1632	4781	24075	1.5e-05	0.0068	LOC_Os07g22750	retrotransposon, putative, centromere-specific, expressed
D or OD	>=3	SBP	GO:0016772	F	transferase activity, transferring phosphorus-containing groups	396	1632	4781	24075	1.5e-05	0.0068	LOC_Os01g42000	skin secretory protein xP2 precursor, putative, expressed
D or OD	>=3	SBP	GO:0016772	F	transferase activity, transferring phosphorus-containing groups	396	1632	4781	24075	1.5e-05	0.0068	LOC_Os06g38930	leucine-rich repeat receptor protein kinase EXS precursor, putative, expressed
D or OD	>=3	SBP	GO:0016772	F	transferase activity, transferring phosphorus-containing groups	396	1632	4781	24075	1.5e-05	0.0068	LOC_Os03g39284	retrotransposon protein, putative, unclassified, expressed
D or OD	>=3	SBP	GO:0016772	F	transferase activity, transferring phosphorus-containing groups	396	1632	4781	24075	1.5e-05	0.0068	LOC_Os03g02320	STE_PAK_Ste20_STLK.3 - STE kinases include homologs to sterile 7, sterile 11 and sterile 20 from yeast, expressed
D or OD	>=3	SBP	GO:0016772	F	transferase activity, transferring phosphorus-containing groups	396	1632	4781	24075	1.5e-05	0.0068	LOC_Os07g24910	retrotransposon protein, putative, Ty3-gypsy subclass, expressed
D or OD	>=3	SBP	GO:0016772	F	transferase activity, transferring phosphorus-containing groups	396	1632	4781	24075	1.5e-05	0.0068	LOC_Os12g15780	retrotransposon protein, putative, unclassified, expressed
D or OD	>=3	SBP	GO:0016772	F	transferase activity, transferring phosphorus-containing groups	396	1632	4781	24075	1.5e-05	0.0068	LOC_Os03g15550	phosphatidylinositol-4-phosphate 5-kinase, putative, expressed
D or OD	>=3	SBP	GO:0016772	F	transferase activity, transferring phosphorus-containing groups	396	1632	4781	24075	1.5e-05	0.0068	LOC_Os03g02980	CAMK_CAMK_like_ULKh_APGy.1 - CAMK includes calcium/calmodulin depedent protein kinases, expressed
D or OD	>=3	SBP	GO:0016772	F	transferase activity, transferring phosphorus-containing groups	396	1632	4781	24075	1.5e-05	0.0068	LOC_Os04g05520	transposon protein, putative, unclassified, expressed
D or OD	>=3	SBP	GO:0016772	F	transferase activity, transferring phosphorus-containing groups	396	1632	4781	24075	1.5e-05	0.0068	LOC_Os07g33010	retrotransposon protein, putative, unclassified, expressed
D or OD	>=3	SBP	GO:0016772	F	transferase activity, transferring phosphorus-containing groups	396	1632	4781	24075	1.5e-05	0.0068	LOC_Os01g60480	retrotransposon protein, putative, unclassified, expressed
D or OD	>=3	SBP	GO:0016772	F	transferase activity, transferring phosphorus-containing groups	396	1632	4781	24075	1.5e-05	0.0068	LOC_Os12g33450	retrotransposon protein, putative, Ty3-gypsy subclass, expressed
D or OD	>=3	SBP	GO:0016772	F	transferase activity, transferring phosphorus-containing groups	396	1632	4781	24075	1.5e-05	0.0068	LOC_Os06g50100	tyrosine protein kinase domain containing protein, putative, expressed
D or OD	>=3	SBP	GO:0016772	F	transferase activity, transferring phosphorus-containing groups	396	1632	4781	24075	1.5e-05	0.0068	LOC_Os12g33690	retrotransposon protein, putative, Ty3-gypsy subclass, expressed
D or OD	>=3	SBP	GO:0016772	F	transferase activity, transferring phosphorus-containing groups	396	1632	4781	24075	1.5e-05	0.0068	LOC_Os09g19530	transposon protein, putative, unclassified, expressed
D or OD	>=3	SBP	GO:0016772	F	transferase activity, transferring phosphorus-containing groups	396	1632	4781	24075	1.5e-05	0.0068	LOC_Os03g33500	retrotransposon protein, putative, unclassified, expressed
D or OD	>=3	SBP	GO:0016772	F	transferase activity, transferring phosphorus-containing groups	396	1632	4781	24075	1.5e-05	0.0068	LOC_Os08g26910	retrotransposon protein, putative, Ty3-gypsy subclass, expressed
D or OD	>=3	SBP	GO:0016772	F	transferase activity, transferring phosphorus-containing groups	396	1632	4781	24075	1.5e-05	0.0068	LOC_Os10g11954	retrotransposon protein, putative, unclassified, expressed
D or OD	>=3	SBP	GO:0016772	F	transferase activity, transferring phosphorus-containing groups	396	1632	4781	24075	1.5e-05	0.0068	LOC_Os10g10920	retrotransposon protein, putative, Ty3-gypsy subclass
D or OD	>=3	SBP	GO:0016772	F	transferase activity, transferring phosphorus-containing groups	396	1632	4781	24075	1.5e-05	0.0068	LOC_Os06g38590	receptor-like protein kinase precursor, putative, expressed
D or OD	>=3	SBP	GO:0016772	F	transferase activity, transferring phosphorus-containing groups	396	1632	4781	24075	1.5e-05	0.0068	LOC_Os03g33680	retrotransposon protein, putative, Ty3-gypsy subclass, expressed
D or OD	>=3	SBP	GO:0016772	F	transferase activity, transferring phosphorus-containing groups	396	1632	4781	24075	1.5e-05	0.0068	LOC_Os09g07010	retrotransposon protein, putative, unclassified, expressed
D or OD	>=3	SBP	GO:0016772	F	transferase activity, transferring phosphorus-containing groups	396	1632	4781	24075	1.5e-05	0.0068	LOC_Os09g19380	receptor-like protein kinase precursor, putative, expressed
D or OD	>=3	SBP	GO:0016772	F	transferase activity, transferring phosphorus-containing groups	396	1632	4781	24075	1.5e-05	0.0068	LOC_Os11g18290	retrotransposon protein, putative, unclassified, expressed
D or OD	>=3	SBP	GO:0016772	F	transferase activity, transferring phosphorus-containing groups	396	1632	4781	24075	1.5e-05	0.0068	LOC_Os04g29290	retrotransposon protein, putative, unclassified
D or OD	>=3	SBP	GO:0016772	F	transferase activity, transferring phosphorus-containing groups	396	1632	4781	24075	1.5e-05	0.0068	LOC_Os07g17610	retrotransposon protein, putative, Ty3-gypsy subclass, expressed
D or OD	>=3	SBP	GO:0016772	F	transferase activity, transferring phosphorus-containing groups	396	1632	4781	24075	1.5e-05	0.0068	LOC_Os06g50200	retrotransposon protein, putative, unclassified, expressed
D or OD	>=3	SBP	GO:0016772	F	transferase activity, transferring phosphorus-containing groups	396	1632	4781	24075	1.5e-05	0.0068	LOC_Os09g19160	serine/threonine-protein kinase, putative, expressed
D or OD	>=3	SBP	GO:0016772	F	transferase activity, transferring phosphorus-containing groups	396	1632	4781	24075	1.5e-05	0.0068	LOC_Os07g17580	retrotransposon protein, putative, Ty3-gypsy subclass, expressed
D or OD	>=3	SBP	GO:0016772	F	transferase activity, transferring phosphorus-containing groups	396	1632	4781	24075	1.5e-05	0.0068	LOC_Os01g60060	leucine-rich repeat family protein, putative, expressed
D or OD	>=3	SBP	GO:0016772	F	transferase activity, transferring phosphorus-containing groups	396	1632	4781	24075	1.5e-05	0.0068	LOC_Os01g59360	CAMK_CAMK_like.10 - CAMK includes calcium/calmodulin depedent protein kinases, expressed
D or OD	>=3	SBP	GO:0016772	F	transferase activity, transferring phosphorus-containing groups	396	1632	4781	24075	1.5e-05	0.0068	LOC_Os03g02680	cyclin-dependent kinase A-1, putative, expressed
D or OD	>=3	SBP	GO:0016772	F	transferase activity, transferring phosphorus-containing groups	396	1632	4781	24075	1.5e-05	0.0068	LOC_Os08g39180	OsWAK73 - OsWAK receptor-like protein kinase, expressed
D or OD	>=3	SBP	GO:0016772	F	transferase activity, transferring phosphorus-containing groups	396	1632	4781	24075	1.5e-05	0.0068	LOC_Os01g02550	protein kinase domain containing protein, expressed
D or OD	>=3	SBP	GO:0016772	F	transferase activity, transferring phosphorus-containing groups	396	1632	4781	24075	1.5e-05	0.0068	LOC_Os11g24990	retrotransposon protein, putative, unclassified, expressed
D or OD	>=3	SBP	GO:0016772	F	transferase activity, transferring phosphorus-containing groups	396	1632	4781	24075	1.5e-05	0.0068	LOC_Os01g02410	protein kinase domain containing protein, expressed
D or OD	>=3	SBP	GO:0016772	F	transferase activity, transferring phosphorus-containing groups	396	1632	4781	24075	1.5e-05	0.0068	LOC_Os04g04900	retrotransposon protein, putative, Ty3-gypsy subclass, expressed
D or OD	>=3	SBP	GO:0016772	F	transferase activity, transferring phosphorus-containing groups	396	1632	4781	24075	1.5e-05	0.0068	LOC_Os03g27280	CAMK_CAMK_like.19 - CAMK includes calcium/calmodulin depedent protein kinases, expressed
D or OD	>=3	SBP	GO:0016772	F	transferase activity, transferring phosphorus-containing groups	396	1632	4781	24075	1.5e-05	0.0068	LOC_Os06g40240	retrotransposon protein, putative, unclassified, expressed
D or OD	>=3	SBP	GO:0016772	F	transferase activity, transferring phosphorus-containing groups	396	1632	4781	24075	1.5e-05	0.0068	LOC_Os03g35430	retrotransposon protein, putative, Ty3-gypsy subclass, expressed
D or OD	>=3	SBP	GO:0016772	F	transferase activity, transferring phosphorus-containing groups	396	1632	4781	24075	1.5e-05	0.0068	LOC_Os06g39400	retrotransposon protein, putative, unclassified, expressed
D or OD	>=3	SBP	GO:0016772	F	transferase activity, transferring phosphorus-containing groups	396	1632	4781	24075	1.5e-05	0.0068	LOC_Os06g38990	receptor-like protein kinase 2 precursor, putative, expressed
D or OD	>=3	SBP	GO:0016772	F	transferase activity, transferring phosphorus-containing groups	396	1632	4781	24075	1.5e-05	0.0068	LOC_Os07g22710	CAMK_CAMK_like.32 - CAMK includes calcium/calmodulin depedent protein kinases, expressed
D or OD	>=3	SBP	GO:0016772	F	transferase activity, transferring phosphorus-containing groups	396	1632	4781	24075	1.5e-05	0.0068	LOC_Os07g17720	retrotransposon protein, putative, Ty3-gypsy subclass
D or OD	>=3	SBP	GO:0016772	F	transferase activity, transferring phosphorus-containing groups	396	1632	4781	24075	1.5e-05	0.0068	LOC_Os06g38970	expressed protein
D or OD	>=3	SBP	GO:0016772	F	transferase activity, transferring phosphorus-containing groups	396	1632	4781	24075	1.5e-05	0.0068	LOC_Os01g23270	retrotransposon protein, putative, Ty3-gypsy subclass, expressed
D or OD	>=3	SBP	GO:0016772	F	transferase activity, transferring phosphorus-containing groups	396	1632	4781	24075	1.5e-05	0.0068	LOC_Os04g06110	retrotransposon protein, putative, Ty3-gypsy subclass, expressed
D or OD	>=3	SBP	GO:0016772	F	transferase activity, transferring phosphorus-containing groups	396	1632	4781	24075	1.5e-05	0.0068	LOC_Os01g28730	protein kinase domain containing protein, expressed
D or OD	>=3	SBP	GO:0016772	F	transferase activity, transferring phosphorus-containing groups	396	1632	4781	24075	1.5e-05	0.0068	LOC_Os03g02200	thymidine kinase, putative, expressed
D or OD	>=3	SBP	GO:0016772	F	transferase activity, transferring phosphorus-containing groups	396	1632	4781	24075	1.5e-05	0.0068	LOC_Os03g15160	retrotransposon protein, putative, Ty3-gypsy subclass, expressed
D or OD	>=3	SBP	GO:0016772	F	transferase activity, transferring phosphorus-containing groups	396	1632	4781	24075	1.5e-05	0.0068	LOC_Os07g24310	retrotransposon protein, putative, unclassified, expressed
D or OD	>=3	SBP	GO:0016772	F	transferase activity, transferring phosphorus-containing groups	396	1632	4781	24075	1.5e-05	0.0068	LOC_Os06g41360	phosphoribosyl transferase, putative, expressed
D or OD	>=3	SBP	GO:0016772	F	transferase activity, transferring phosphorus-containing groups	396	1632	4781	24075	1.5e-05	0.0068	LOC_Os07g22960	retrotransposon protein, putative, unclassified, expressed
D or OD	>=3	SBP	GO:0016772	F	transferase activity, transferring phosphorus-containing groups	396	1632	4781	24075	1.5e-05	0.0068	LOC_Os06g39700	DNA-directed RNA polymerase subunit alpha, putative, expressed
D or OD	>=3	SBP	GO:0016772	F	transferase activity, transferring phosphorus-containing groups	396	1632	4781	24075	1.5e-05	0.0068	LOC_Os03g35540	retrotransposon protein, putative, unclassified, expressed
D or OD	>=3	SBP	GO:0016772	F	transferase activity, transferring phosphorus-containing groups	396	1632	4781	24075	1.5e-05	0.0068	LOC_Os01g60440	HEAT repeat family protein, putative, expressed
D or OD	>=3	SBP	GO:0016772	F	transferase activity, transferring phosphorus-containing groups	396	1632	4781	24075	1.5e-05	0.0068	LOC_Os01g23120	retrotransposon protein, putative, Ty3-gypsy subclass, expressed
D or OD	>=3	SBP	GO:0016772	F	transferase activity, transferring phosphorus-containing groups	396	1632	4781	24075	1.5e-05	0.0068	LOC_Os12g33360	retrotransposon protein, putative, Ty3-gypsy subclass, expressed
D or OD	>=3	SBP	GO:0016772	F	transferase activity, transferring phosphorus-containing groups	396	1632	4781	24075	1.5e-05	0.0068	LOC_Os07g22400	POLA3 - Putative DNA polymerase alpha complex subunit, expressed
D or OD	>=3	SBP	GO:0016772	F	transferase activity, transferring phosphorus-containing groups	396	1632	4781	24075	1.5e-05	0.0068	LOC_Os04g06430	retrotransposon protein, putative, Ty3-gypsy subclass, expressed
D or OD	>=3	SBP	GO:0016772	F	transferase activity, transferring phosphorus-containing groups	396	1632	4781	24075	1.5e-05	0.0068	LOC_Os08g25330	retrotransposon protein, putative, Ty3-gypsy subclass
D or OD	>=3	SBP	GO:0016772	F	transferase activity, transferring phosphorus-containing groups	396	1632	4781	24075	1.5e-05	0.0068	LOC_Os01g10890	CAMK_KIN1/SNF1/Nim1_like.8 - CAMK includes calcium/calmodulin depedent protein kinases, expressed
D or OD	>=3	SBP	GO:0016772	F	transferase activity, transferring phosphorus-containing groups	396	1632	4781	24075	1.5e-05	0.0068	LOC_Os11g18240	retrotransposon protein, putative, Ty3-gypsy subclass, expressed
D or OD	>=3	SBP	GO:0016772	F	transferase activity, transferring phosphorus-containing groups	396	1632	4781	24075	1.5e-05	0.0068	LOC_Os03g33230	retrotransposon protein, putative, unclassified, expressed
D or OD	>=3	SBP	GO:0016772	F	transferase activity, transferring phosphorus-containing groups	396	1632	4781	24075	1.5e-05	0.0068	LOC_Os06g43460	retrotransposon protein, putative, unclassified, expressed
D or OD	>=3	SBP	GO:0016772	F	transferase activity, transferring phosphorus-containing groups	396	1632	4781	24075	1.5e-05	0.0068	LOC_Os04g04160	retrotransposon protein, putative, Ty3-gypsy subclass, expressed
D or OD	>=3	SBP	GO:0016772	F	transferase activity, transferring phosphorus-containing groups	396	1632	4781	24075	1.5e-05	0.0068	LOC_Os01g02350	receptor-like kinase ARK1AS, putative, expressed
D or OD	>=3	SBP	GO:0016772	F	transferase activity, transferring phosphorus-containing groups	396	1632	4781	24075	1.5e-05	0.0068	LOC_Os10g11680	retrotransposon protein, putative, unclassified, expressed
D or OD	>=3	SBP	GO:0016772	F	transferase activity, transferring phosphorus-containing groups	396	1632	4781	24075	1.5e-05	0.0068	LOC_Os09g07270	retrotransposon protein, putative, Ty3-gypsy subclass, expressed
D or OD	>=3	SBP	GO:0016772	F	transferase activity, transferring phosphorus-containing groups	396	1632	4781	24075	1.5e-05	0.0068	LOC_Os04g04710	retrotransposon protein, putative, unclassified, expressed
D or OD	>=3	SBP	GO:0016772	F	transferase activity, transferring phosphorus-containing groups	396	1632	4781	24075	1.5e-05	0.0068	LOC_Os04g05470	protein kinase, putative, expressed
D or OD	>=3	SBP	GO:0016772	F	transferase activity, transferring phosphorus-containing groups	396	1632	4781	24075	1.5e-05	0.0068	LOC_Os03g26390	retrotransposon protein, putative, Ty3-gypsy subclass, expressed
D or OD	>=3	SBP	GO:0016772	F	transferase activity, transferring phosphorus-containing groups	396	1632	4781	24075	1.5e-05	0.0068	LOC_Os06g38010	retrotransposon protein, putative, Ty3-gypsy subclass, expressed
D or OD	>=3	SBP	GO:0016772	F	transferase activity, transferring phosphorus-containing groups	396	1632	4781	24075	1.5e-05	0.0068	LOC_Os04g04490	retrotransposon protein, putative, Ty3-gypsy subclass, expressed
D or OD	>=3	SBP	GO:0016772	F	transferase activity, transferring phosphorus-containing groups	396	1632	4781	24075	1.5e-05	0.0068	LOC_Os09g18530	nodulation receptor kinase precursor, putative, expressed
D or OD	>=3	SBP	GO:0016772	F	transferase activity, transferring phosphorus-containing groups	396	1632	4781	24075	1.5e-05	0.0068	LOC_Os07g32650	retrotransposon protein, putative, unclassified, expressed
D or OD	>=3	SBP	GO:0016772	F	transferase activity, transferring phosphorus-containing groups	396	1632	4781	24075	1.5e-05	0.0068	LOC_Os08g25190	retrotransposon protein, putative, unclassified, expressed
D or OD	>=3	SBP	GO:0016772	F	transferase activity, transferring phosphorus-containing groups	396	1632	4781	24075	1.5e-05	0.0068	LOC_Os07g24100	retrotransposon protein, putative, unclassified, expressed
D or OD	>=3	SBP	GO:0016772	F	transferase activity, transferring phosphorus-containing groups	396	1632	4781	24075	1.5e-05	0.0068	LOC_Os12g31960	retrotransposon protein, putative, LINE subclass, expressed
D or OD	>=3	SBP	GO:0016772	F	transferase activity, transferring phosphorus-containing groups	396	1632	4781	24075	1.5e-05	0.0068	LOC_Os01g59570	senescence-induced receptor-like serine/threonine-protein kinase precursor, putative, expressed
D or OD	>=3	SBP	GO:0016772	F	transferase activity, transferring phosphorus-containing groups	396	1632	4781	24075	1.5e-05	0.0068	LOC_Os04g05580	kinase, putative, expressed
D or OD	>=3	SBP	GO:0016772	F	transferase activity, transferring phosphorus-containing groups	396	1632	4781	24075	1.5e-05	0.0068	LOC_Os06g38650	receptor-like protein kinase precursor, putative, expressed
D or OD	>=3	SBP	GO:0016772	F	transferase activity, transferring phosphorus-containing groups	396	1632	4781	24075	1.5e-05	0.0068	LOC_Os01g12420	receptor-like protein kinase, putative, expressed
D or OD	>=3	SBP	GO:0016772	F	transferase activity, transferring phosphorus-containing groups	396	1632	4781	24075	1.5e-05	0.0068	LOC_Os02g44440	retrotransposon protein, putative, unclassified, expressed
D or OD	>=3	SBP	GO:0016772	F	transferase activity, transferring phosphorus-containing groups	396	1632	4781	24075	1.5e-05	0.0068	LOC_Os06g38420	retrotransposon protein, putative, Ty3-gypsy subclass, expressed
D or OD	>=3	SBP	GO:0016772	F	transferase activity, transferring phosphorus-containing groups	396	1632	4781	24075	1.5e-05	0.0068	LOC_Os01g41960	retrotransposon protein, putative, unclassified, expressed
D or OD	>=3	SBP	GO:0016772	F	transferase activity, transferring phosphorus-containing groups	396	1632	4781	24075	1.5e-05	0.0068	LOC_Os06g39930	retrotransposon protein, putative, unclassified, expressed
D or OD	>=3	SBP	GO:0016772	F	transferase activity, transferring phosphorus-containing groups	396	1632	4781	24075	1.5e-05	0.0068	LOC_Os06g38340	receptor-like protein kinase precursor, putative, expressed
D or OD	>=3	SBP	GO:0016772	F	transferase activity, transferring phosphorus-containing groups	396	1632	4781	24075	1.5e-05	0.0068	LOC_Os02g45130	protein kinase, putative, expressed
D or OD	>=3	SBP	GO:0016772	F	transferase activity, transferring phosphorus-containing groups	396	1632	4781	24075	1.5e-05	0.0068	LOC_Os09g07120	DNA-directed RNA polymerase 1B, mitochondrial precursor, putative, expressed
D or OD	>=3	SBP	GO:0016772	F	transferase activity, transferring phosphorus-containing groups	396	1632	4781	24075	1.5e-05	0.0068	LOC_Os12g15700	retrotransposon protein, putative, unclassified, expressed
D or OD	>=3	SBP	GO:0016772	F	transferase activity, transferring phosphorus-containing groups	396	1632	4781	24075	1.5e-05	0.0068	LOC_Os12g34090	retrotransposon protein, putative, Ty3-gypsy subclass, expressed
D or OD	>=3	SBP	GO:0016772	F	transferase activity, transferring phosphorus-containing groups	396	1632	4781	24075	1.5e-05	0.0068	LOC_Os08g39174	retrotransposon protein, putative, Ty1-copia subclass, expressed
D or OD	>=3	SBP	GO:0016772	F	transferase activity, transferring phosphorus-containing groups	396	1632	4781	24075	1.5e-05	0.0068	LOC_Os01g11260	phospho-N-acetylmuramoyl-pentapeptide-transferase, putative, expressed
D or OD	>=3	SBP	GO:0016772	F	transferase activity, transferring phosphorus-containing groups	396	1632	4781	24075	1.5e-05	0.0068	LOC_Os02g44920	protein kinase domain containing protein, expressed
D or OD	>=3	SBP	GO:0016772	F	transferase activity, transferring phosphorus-containing groups	396	1632	4781	24075	1.5e-05	0.0068	LOC_Os07g38340	retrotransposon protein, putative, Ty3-gypsy subclass, expressed
D or OD	>=3	SBP	GO:0016772	F	transferase activity, transferring phosphorus-containing groups	396	1632	4781	24075	1.5e-05	0.0068	LOC_Os04g05290	retrotransposon protein, putative, Ty3-gypsy subclass, expressed
D or OD	>=3	SBP	GO:0016772	F	transferase activity, transferring phosphorus-containing groups	396	1632	4781	24075	1.5e-05	0.0068	LOC_Os06g40110	RNA polymerase Rpc34 subunit family protein, expressed
D or OD	>=3	SBP	GO:0016772	F	transferase activity, transferring phosphorus-containing groups	396	1632	4781	24075	1.5e-05	0.0068	LOC_Os04g06610	retrotransposon protein, putative, Ty3-gypsy subclass, expressed
D or OD	>=3	SBP	GO:0016772	F	transferase activity, transferring phosphorus-containing groups	396	1632	4781	24075	1.5e-05	0.0068	LOC_Os01g10900	MRH1, putative, expressed
D or OD	>=3	SBP	GO:0016772	F	transferase activity, transferring phosphorus-containing groups	396	1632	4781	24075	1.5e-05	0.0068	LOC_Os03g39330	retrotransposon protein, putative, Ty3-gypsy subclass, expressed
D or OD	>=3	SBP	GO:0016772	F	transferase activity, transferring phosphorus-containing groups	396	1632	4781	24075	1.5e-05	0.0068	LOC_Os06g39840	retrotransposon protein, putative, unclassified, expressed
D or OD	>=3	SBP	GO:0016772	F	transferase activity, transferring phosphorus-containing groups	396	1632	4781	24075	1.5e-05	0.0068	LOC_Os04g29330	retrotransposon protein, putative, Ty3-gypsy subclass, expressed
D or OD	>=3	SBP	GO:0016772	F	transferase activity, transferring phosphorus-containing groups	396	1632	4781	24075	1.5e-05	0.0068	LOC_Os06g50340	receptor protein kinase CLAVATA1 precursor, putative, expressed
D or OD	>=3	SBP	GO:0016772	F	transferase activity, transferring phosphorus-containing groups	396	1632	4781	24075	1.5e-05	0.0068	LOC_Os06g43030	protein kinase domain containing protein, expressed
D or OD	>=3	SBP	GO:0016772	F	transferase activity, transferring phosphorus-containing groups	396	1632	4781	24075	1.5e-05	0.0068	LOC_Os03g39500	retrotransposon protein, putative, Ty3-gypsy subclass, expressed
D or OD	>=3	SBP	GO:0016772	F	transferase activity, transferring phosphorus-containing groups	396	1632	4781	24075	1.5e-05	0.0068	LOC_Os04g05710	retrotransposon protein, putative, Ty3-gypsy subclass, expressed
D or OD	>=3	SBP	GO:0016772	F	transferase activity, transferring phosphorus-containing groups	396	1632	4781	24075	1.5e-05	0.0068	LOC_Os04g04530	retrotransposon protein, putative, Ty3-gypsy subclass, expressed
D or OD	>=3	SBP	GO:0016772	F	transferase activity, transferring phosphorus-containing groups	396	1632	4781	24075	1.5e-05	0.0068	LOC_Os07g25270	retrotransposon protein, putative, Ty3-gypsy subclass, expressed
D or OD	>=3	SBP	GO:0016772	F	transferase activity, transferring phosphorus-containing groups	396	1632	4781	24075	1.5e-05	0.0068	LOC_Os12g15820	retrotransposon protein, putative, Ty3-gypsy subclass, expressed
D or OD	>=3	SBP	GO:0016772	F	transferase activity, transferring phosphorus-containing groups	396	1632	4781	24075	1.5e-05	0.0068	LOC_Os07g37200	transposon protein, putative, unclassified, expressed
D or OD	>=3	SBP	GO:0016772	F	transferase activity, transferring phosphorus-containing groups	396	1632	4781	24075	1.5e-05	0.0068	LOC_Os06g50910	Phosphatidylinositol kinase and FAT containing domain protein, putative, expressed
D or OD	>=3	SBP	GO:0016772	F	transferase activity, transferring phosphorus-containing groups	396	1632	4781	24075	1.5e-05	0.0068	LOC_Os03g15450	retrotransposon protein, putative, Ty3-gypsy subclass, expressed
D or OD	>=3	SBP	GO:0016772	F	transferase activity, transferring phosphorus-containing groups	396	1632	4781	24075	1.5e-05	0.0068	LOC_Os07g38120	CAMK_CAMK_like.34 - CAMK includes calcium/calmodulin depedent protein kinases, expressed
D or OD	>=3	SBP	GO:0016772	F	transferase activity, transferring phosphorus-containing groups	396	1632	4781	24075	1.5e-05	0.0068	LOC_Os08g27110	retrotransposon protein, putative, Ty3-gypsy subclass, expressed
D or OD	>=3	SBP	GO:0016772	F	transferase activity, transferring phosphorus-containing groups	396	1632	4781	24075	1.5e-05	0.0068	LOC_Os12g33330	retrotransposon protein, putative, Ty3-gypsy subclass, expressed
D or OD	>=3	SBP	GO:0016772	F	transferase activity, transferring phosphorus-containing groups	396	1632	4781	24075	1.5e-05	0.0068	LOC_Os03g33280	retrotransposon protein, putative, Ty3-gypsy subclass, expressed
D or OD	>=3	SBP	GO:0016772	F	transferase activity, transferring phosphorus-containing groups	396	1632	4781	24075	1.5e-05	0.0068	LOC_Os06g37750	S-locus-like receptor protein kinase, putative, expressed
D or OD	>=3	SBP	GO:0016772	F	transferase activity, transferring phosphorus-containing groups	396	1632	4781	24075	1.5e-05	0.0068	LOC_Os03g26890	retrotransposon protein, putative, Ty3-gypsy subclass, expressed
D or OD	>=3	SBP	GO:0016772	F	transferase activity, transferring phosphorus-containing groups	396	1632	4781	24075	1.5e-05	0.0068	LOC_Os07g23480	retrotransposon protein, putative, unclassified, expressed
D or OD	>=3	SBP	GO:0016772	F	transferase activity, transferring phosphorus-containing groups	396	1632	4781	24075	1.5e-05	0.0068	LOC_Os03g33042	retrotransposon protein, putative, unclassified, expressed
D or OD	>=3	SBP	GO:0016772	F	transferase activity, transferring phosphorus-containing groups	396	1632	4781	24075	1.5e-05	0.0068	LOC_Os10g11920	retrotransposon protein, putative, Ty3-gypsy subclass, expressed
D or OD	>=3	SBP	GO:0016772	F	transferase activity, transferring phosphorus-containing groups	396	1632	4781	24075	1.5e-05	0.0068	LOC_Os11g45420	retrotransposon protein, putative, unclassified, expressed
D or OD	>=3	SBP	GO:0016772	F	transferase activity, transferring phosphorus-containing groups	396	1632	4781	24075	1.5e-05	0.0068	LOC_Os01g68350	retrotransposon protein, putative, unclassified, expressed
D or OD	>=3	SBP	GO:0016772	F	transferase activity, transferring phosphorus-containing groups	396	1632	4781	24075	1.5e-05	0.0068	LOC_Os03g39590	retrotransposon protein, putative, unclassified, expressed
D or OD	>=3	SBP	GO:0044260	P	cellular macromolecule metabolic process	708	1632	9350	24075	0.00016	0.04	LOC_Os03g33300	retrotransposon, putative, centromere-specific, expressed
D or OD	>=3	SBP	GO:0044260	P	cellular macromolecule metabolic process	708	1632	9350	24075	0.00016	0.04	LOC_Os03g02190	protein kinase domain containing protein, expressed
D or OD	>=3	SBP	GO:0044260	P	cellular macromolecule metabolic process	708	1632	9350	24075	0.00016	0.04	LOC_Os08g09140	retrotransposon protein, putative, Ty3-gypsy subclass, expressed
D or OD	>=3	SBP	GO:0044260	P	cellular macromolecule metabolic process	708	1632	9350	24075	0.00016	0.04	LOC_Os07g22750	retrotransposon, putative, centromere-specific, expressed
D or OD	>=3	SBP	GO:0044260	P	cellular macromolecule metabolic process	708	1632	9350	24075	0.00016	0.04	LOC_Os01g58610	phosphoglycerate kinase protein, putative, expressed
D or OD	>=3	SBP	GO:0044260	P	cellular macromolecule metabolic process	708	1632	9350	24075	0.00016	0.04	LOC_Os03g34170	retrotransposon protein, putative, unclassified, expressed
D or OD	>=3	SBP	GO:0044260	P	cellular macromolecule metabolic process	708	1632	9350	24075	0.00016	0.04	LOC_Os04g05970	retrotransposon protein, putative, Ty3-gypsy subclass, expressed
D or OD	>=3	SBP	GO:0044260	P	cellular macromolecule metabolic process	708	1632	9350	24075	0.00016	0.04	LOC_Os04g42010	RNA binding protein, putative, expressed
D or OD	>=3	SBP	GO:0044260	P	cellular macromolecule metabolic process	708	1632	9350	24075	0.00016	0.04	LOC_Os04g04150	retrotransposon protein, putative, Ty3-gypsy subclass, expressed
D or OD	>=3	SBP	GO:0044260	P	cellular macromolecule metabolic process	708	1632	9350	24075	0.00016	0.04	LOC_Os04g06374	retrotransposon protein, putative, Ty3-gypsy subclass, expressed
D or OD	>=3	SBP	GO:0044260	P	cellular macromolecule metabolic process	708	1632	9350	24075	0.00016	0.04	LOC_Os01g02360	resistance-related receptor-like kinase, putative, expressed
D or OD	>=3	SBP	GO:0044260	P	cellular macromolecule metabolic process	708	1632	9350	24075	0.00016	0.04	LOC_Os10g12030	retrotransposon protein, putative, unclassified, expressed
D or OD	>=3	SBP	GO:0044260	P	cellular macromolecule metabolic process	708	1632	9350	24075	0.00016	0.04	LOC_Os12g34320	S-locus-like receptor protein kinase, putative, expressed
D or OD	>=3	SBP	GO:0044260	P	cellular macromolecule metabolic process	708	1632	9350	24075	0.00016	0.04	LOC_Os07g33130	retrotransposon protein, putative, unclassified, expressed
D or OD	>=3	SBP	GO:0044260	P	cellular macromolecule metabolic process	708	1632	9350	24075	0.00016	0.04	LOC_Os12g33530	retrotransposon protein, putative, Ty3-gypsy subclass, expressed
D or OD	>=3	SBP	GO:0044260	P	cellular macromolecule metabolic process	708	1632	9350	24075	0.00016	0.04	LOC_Os10g22250	retrotransposon protein, putative, Ty3-gypsy subclass, expressed
D or OD	>=3	SBP	GO:0044260	P	cellular macromolecule metabolic process	708	1632	9350	24075	0.00016	0.04	LOC_Os06g41770	bZIP transcription factor domain containing protein, expressed
D or OD	>=3	SBP	GO:0044260	P	cellular macromolecule metabolic process	708	1632	9350	24075	0.00016	0.04	LOC_Os03g39150	protein kinase domain containing protein, expressed
D or OD	>=3	SBP	GO:0044260	P	cellular macromolecule metabolic process	708	1632	9350	24075	0.00016	0.04	LOC_Os02g43870	inactive receptor kinase At2g26730 precursor, putative, expressed
D or OD	>=3	SBP	GO:0044260	P	cellular macromolecule metabolic process	708	1632	9350	24075	0.00016	0.04	LOC_Os05g24730	retrotransposon protein, putative, unclassified
D or OD	>=3	SBP	GO:0044260	P	cellular macromolecule metabolic process	708	1632	9350	24075	0.00016	0.04	LOC_Os09g19390	senescence-induced receptor-like serine/threonine-protein kinase precursor, putative, expressed
D or OD	>=3	SBP	GO:0044260	P	cellular macromolecule metabolic process	708	1632	9350	24075	0.00016	0.04	LOC_Os03g33760	retrotransposon protein, putative, unclassified, expressed
D or OD	>=3	SBP	GO:0044260	P	cellular macromolecule metabolic process	708	1632	9350	24075	0.00016	0.04	LOC_Os06g49480	peptidyl-prolyl cis-trans isomerase, putative, expressed
D or OD	>=3	SBP	GO:0044260	P	cellular macromolecule metabolic process	708	1632	9350	24075	0.00016	0.04	LOC_Os03g34190	retrotransposon protein, putative, Ty3-gypsy subclass, expressed
D or OD	>=3	SBP	GO:0044260	P	cellular macromolecule metabolic process	708	1632	9350	24075	0.00016	0.04	LOC_Os01g10710	receptor-like protein kinase, putative, expressed
D or OD	>=3	SBP	GO:0044260	P	cellular macromolecule metabolic process	708	1632	9350	24075	0.00016	0.04	LOC_Os03g15590	eukaryotic translation initiation factor, putative, expressed
D or OD	>=3	SBP	GO:0044260	P	cellular macromolecule metabolic process	708	1632	9350	24075	0.00016	0.04	LOC_Os09g31300	helix-loop-helix DNA-binding domain containing protein, expressed
D or OD	>=3	SBP	GO:0044260	P	cellular macromolecule metabolic process	708	1632	9350	24075	0.00016	0.04	LOC_Os03g33940	retrotransposon protein, putative, unclassified, expressed
D or OD	>=3	SBP	GO:0044260	P	cellular macromolecule metabolic process	708	1632	9350	24075	0.00016	0.04	LOC_Os06g38260	retrotransposon protein, putative, Ty3-gypsy subclass, expressed
D or OD	>=3	SBP	GO:0044260	P	cellular macromolecule metabolic process	708	1632	9350	24075	0.00016	0.04	LOC_Os03g27990	STRUBBELIG-RECEPTOR FAMILY 7 precursor, putative, expressed
D or OD	>=3	SBP	GO:0044260	P	cellular macromolecule metabolic process	708	1632	9350	24075	0.00016	0.04	LOC_Os04g06210	cysteine-rich receptor-like protein kinase 36 precursor, putative, expressed
D or OD	>=3	SBP	GO:0044260	P	cellular macromolecule metabolic process	708	1632	9350	24075	0.00016	0.04	LOC_Os01g60190	2,3-bisphosphoglycerate-independent phosphoglycerate mutase, putative, expressed
D or OD	>=3	SBP	GO:0044260	P	cellular macromolecule metabolic process	708	1632	9350	24075	0.00016	0.04	LOC_Os04g05900	retrotransposon protein, putative, Ty3-gypsy subclass, expressed
D or OD	>=3	SBP	GO:0044260	P	cellular macromolecule metabolic process	708	1632	9350	24075	0.00016	0.04	LOC_Os08g24530	retrotransposon protein, putative, Ty3-gypsy subclass, expressed
D or OD	>=3	SBP	GO:0044260	P	cellular macromolecule metabolic process	708	1632	9350	24075	0.00016	0.04	LOC_Os04g04300	retrotransposon protein, putative, unclassified, expressed
D or OD	>=3	SBP	GO:0044260	P	cellular macromolecule metabolic process	708	1632	9350	24075	0.00016	0.04	LOC_Os03g33780	retrotransposon protein, putative, Ty3-gypsy subclass, expressed
D or OD	>=3	SBP	GO:0044260	P	cellular macromolecule metabolic process	708	1632	9350	24075	0.00016	0.04	LOC_Os03g39284	retrotransposon protein, putative, unclassified, expressed
D or OD	>=3	SBP	GO:0044260	P	cellular macromolecule metabolic process	708	1632	9350	24075	0.00016	0.04	LOC_Os12g32250	WRKY96, expressed
D or OD	>=3	SBP	GO:0044260	P	cellular macromolecule metabolic process	708	1632	9350	24075	0.00016	0.04	LOC_Os06g06930	receptor-like protein kinase, putative, expressed
D or OD	>=3	SBP	GO:0044260	P	cellular macromolecule metabolic process	708	1632	9350	24075	0.00016	0.04	LOC_Os06g43150	retrotransposon protein, putative, unclassified, expressed
D or OD	>=3	SBP	GO:0044260	P	cellular macromolecule metabolic process	708	1632	9350	24075	0.00016	0.04	LOC_Os03g35600	serine/threonine-protein kinase receptor precursor, putative, expressed
D or OD	>=3	SBP	GO:0044260	P	cellular macromolecule metabolic process	708	1632	9350	24075	0.00016	0.04	LOC_Os07g38300	ribosome recycling factor, putative, expressed
D or OD	>=3	SBP	GO:0044260	P	cellular macromolecule metabolic process	708	1632	9350	24075	0.00016	0.04	LOC_Os01g02400	protein kinase domain containing protein, expressed
D or OD	>=3	SBP	GO:0044260	P	cellular macromolecule metabolic process	708	1632	9350	24075	0.00016	0.04	LOC_Os03g02320	STE_PAK_Ste20_STLK.3 - STE kinases include homologs to sterile 7, sterile 11 and sterile 20 from yeast, expressed
D or OD	>=3	SBP	GO:0044260	P	cellular macromolecule metabolic process	708	1632	9350	24075	0.00016	0.04	LOC_Os04g29190	retrotransposon protein, putative, unclassified, expressed
D or OD	>=3	SBP	GO:0044260	P	cellular macromolecule metabolic process	708	1632	9350	24075	0.00016	0.04	LOC_Os06g38760	retrotransposon protein, putative, unclassified, expressed
D or OD	>=3	SBP	GO:0044260	P	cellular macromolecule metabolic process	708	1632	9350	24075	0.00016	0.04	LOC_Os06g38609	retrotransposon protein, putative, unclassified, expressed
D or OD	>=3	SBP	GO:0044260	P	cellular macromolecule metabolic process	708	1632	9350	24075	0.00016	0.04	LOC_Os02g45040	retrotransposon protein, putative, unclassified, expressed
D or OD	>=3	SBP	GO:0044260	P	cellular macromolecule metabolic process	708	1632	9350	24075	0.00016	0.04	LOC_Os09g06820	retrotransposon protein, putative, Ty3-gypsy subclass, expressed
D or OD	>=3	SBP	GO:0044260	P	cellular macromolecule metabolic process	708	1632	9350	24075	0.00016	0.04	LOC_Os07g32690	retrotransposon protein, putative, unclassified, expressed
D or OD	>=3	SBP	GO:0044260	P	cellular macromolecule metabolic process	708	1632	9350	24075	0.00016	0.04	LOC_Os01g23200	retrotransposon protein, putative, Ty3-gypsy subclass, expressed
D or OD	>=3	SBP	GO:0044260	P	cellular macromolecule metabolic process	708	1632	9350	24075	0.00016	0.04	LOC_Os08g24870	retrotransposon protein, putative, unclassified, expressed
D or OD	>=3	SBP	GO:0044260	P	cellular macromolecule metabolic process	708	1632	9350	24075	0.00016	0.04	LOC_Os03g15570	STE_MEKK_ste11_MAP3K.12 - STE kinases include homologs to sterile 7, sterile 11 and sterile 20 from yeast, expressed
D or OD	>=3	SBP	GO:0044260	P	cellular macromolecule metabolic process	708	1632	9350	24075	0.00016	0.04	LOC_Os06g43170	transposon protein, putative, unclassified, expressed
D or OD	>=3	SBP	GO:0044260	P	cellular macromolecule metabolic process	708	1632	9350	24075	0.00016	0.04	LOC_Os06g50300	heat shock protein, putative, expressed
D or OD	>=3	SBP	GO:0044260	P	cellular macromolecule metabolic process	708	1632	9350	24075	0.00016	0.04	LOC_Os08g26880	bZIP transcription factor domain containing protein, expressed
D or OD	>=3	SBP	GO:0044260	P	cellular macromolecule metabolic process	708	1632	9350	24075	0.00016	0.04	LOC_Os06g39960	bZIP transcription factor domain containing protein, expressed
D or OD	>=3	SBP	GO:0044260	P	cellular macromolecule metabolic process	708	1632	9350	24075	0.00016	0.04	LOC_Os09g35030	dehydration-responsive element-binding protein, putative, expressed
D or OD	>=3	SBP	GO:0044260	P	cellular macromolecule metabolic process	708	1632	9350	24075	0.00016	0.04	LOC_Os06g38780	receptor-like protein kinase 2 precursor, putative, expressed
D or OD	>=3	SBP	GO:0044260	P	cellular macromolecule metabolic process	708	1632	9350	24075	0.00016	0.04	LOC_Os08g24320	retrotransposon protein, putative, unclassified, expressed
D or OD	>=3	SBP	GO:0044260	P	cellular macromolecule metabolic process	708	1632	9350	24075	0.00016	0.04	LOC_Os07g25230	retrotransposon protein, putative, unclassified, expressed
D or OD	>=3	SBP	GO:0044260	P	cellular macromolecule metabolic process	708	1632	9350	24075	0.00016	0.04	LOC_Os04g05160	retrotransposon protein, putative, Ty3-gypsy subclass, expressed
D or OD	>=3	SBP	GO:0044260	P	cellular macromolecule metabolic process	708	1632	9350	24075	0.00016	0.04	LOC_Os12g34062	mitochondrial ribosomal protein S12, putative, expressed
D or OD	>=3	SBP	GO:0044260	P	cellular macromolecule metabolic process	708	1632	9350	24075	0.00016	0.04	LOC_Os12g15750	retrotransposon protein, putative, Ty3-gypsy subclass, expressed
D or OD	>=3	SBP	GO:0044260	P	cellular macromolecule metabolic process	708	1632	9350	24075	0.00016	0.04	LOC_Os01g23330	retrotransposon, putative, centromere-specific, expressed
D or OD	>=3	SBP	GO:0044260	P	cellular macromolecule metabolic process	708	1632	9350	24075	0.00016	0.04	LOC_Os02g44810	tRNA pseudouridine synthase family protein, putative, expressed
D or OD	>=3	SBP	GO:0044260	P	cellular macromolecule metabolic process	708	1632	9350	24075	0.00016	0.04	LOC_Os04g04800	protein kinase domain containing protein, expressed
D or OD	>=3	SBP	GO:0044260	P	cellular macromolecule metabolic process	708	1632	9350	24075	0.00016	0.04	LOC_Os02g44400	transposon protein, putative, unclassified, expressed
D or OD	>=3	SBP	GO:0044260	P	cellular macromolecule metabolic process	708	1632	9350	24075	0.00016	0.04	LOC_Os06g38460	expressed protein
D or OD	>=3	SBP	GO:0044260	P	cellular macromolecule metabolic process	708	1632	9350	24075	0.00016	0.04	LOC_Os03g35326	retrotransposon protein, putative, unclassified, expressed
D or OD	>=3	SBP	GO:0044260	P	cellular macromolecule metabolic process	708	1632	9350	24075	0.00016	0.04	LOC_Os08g26970	retrotransposon protein, putative, unclassified, expressed
D or OD	>=3	SBP	GO:0044260	P	cellular macromolecule metabolic process	708	1632	9350	24075	0.00016	0.04	LOC_Os03g26090	GPI-anchored wall transfer protein 1, putative, expressed
D or OD	>=3	SBP	GO:0044260	P	cellular macromolecule metabolic process	708	1632	9350	24075	0.00016	0.04	LOC_Os09g07070	retrotransposon protein, putative, Ty3-gypsy subclass, expressed
D or OD	>=3	SBP	GO:0044260	P	cellular macromolecule metabolic process	708	1632	9350	24075	0.00016	0.04	LOC_Os03g15250	lectin-like receptor kinase, putative, expressed
D or OD	>=3	SBP	GO:0044260	P	cellular macromolecule metabolic process	708	1632	9350	24075	0.00016	0.04	LOC_Os12g31610	lectin-like protein kinase, putative, expressed
D or OD	>=3	SBP	GO:0044260	P	cellular macromolecule metabolic process	708	1632	9350	24075	0.00016	0.04	LOC_Os01g10870	CAMK_KIN1/SNF1/Nim1_like.7 - CAMK includes calcium/calmodulin depedent protein kinases, expressed
D or OD	>=3	SBP	GO:0044260	P	cellular macromolecule metabolic process	708	1632	9350	24075	0.00016	0.04	LOC_Os01g11070	Alg9-like mannosyltransferase protein, putative, expressed
D or OD	>=3	SBP	GO:0044260	P	cellular macromolecule metabolic process	708	1632	9350	24075	0.00016	0.04	LOC_Os08g29540	retrotransposon protein, putative, unclassified, expressed
D or OD	>=3	SBP	GO:0044260	P	cellular macromolecule metabolic process	708	1632	9350	24075	0.00016	0.04	LOC_Os01g59640	no apical meristem protein, putative, expressed
D or OD	>=3	SBP	GO:0044260	P	cellular macromolecule metabolic process	708	1632	9350	24075	0.00016	0.04	LOC_Os01g58680	apurinic endonuclease-redox protein, putative, expressed
D or OD	>=3	SBP	GO:0044260	P	cellular macromolecule metabolic process	708	1632	9350	24075	0.00016	0.04	LOC_Os01g68410	retrotransposon protein, putative, Ty3-gypsy subclass, expressed
D or OD	>=3	SBP	GO:0044260	P	cellular macromolecule metabolic process	708	1632	9350	24075	0.00016	0.04	LOC_Os07g22770	AP2 domain containing protein, expressed
D or OD	>=3	SBP	GO:0044260	P	cellular macromolecule metabolic process	708	1632	9350	24075	0.00016	0.04	LOC_Os06g39890	retrotransposon protein, putative, unclassified, expressed
D or OD	>=3	SBP	GO:0044260	P	cellular macromolecule metabolic process	708	1632	9350	24075	0.00016	0.04	LOC_Os07g25040	retrotransposon protein, putative, Ty3-gypsy subclass, expressed
D or OD	>=3	SBP	GO:0044260	P	cellular macromolecule metabolic process	708	1632	9350	24075	0.00016	0.04	LOC_Os03g03250	retrotransposon protein, putative, Ty3-gypsy subclass, expressed
D or OD	>=3	SBP	GO:0044260	P	cellular macromolecule metabolic process	708	1632	9350	24075	0.00016	0.04	LOC_Os02g43970	AP2 domain containing protein, expressed
D or OD	>=3	SBP	GO:0044260	P	cellular macromolecule metabolic process	708	1632	9350	24075	0.00016	0.04	LOC_Os01g58570	retrotransposon protein, putative, Ty3-gypsy subclass, expressed
D or OD	>=3	SBP	GO:0044260	P	cellular macromolecule metabolic process	708	1632	9350	24075	0.00016	0.04	LOC_Os03g26440	tRNA pseudouridine synthase family protein, putative, expressed
D or OD	>=3	SBP	GO:0044260	P	cellular macromolecule metabolic process	708	1632	9350	24075	0.00016	0.04	LOC_Os06g40150	AP2 domain containing protein, expressed
D or OD	>=3	SBP	GO:0044260	P	cellular macromolecule metabolic process	708	1632	9350	24075	0.00016	0.04	LOC_Os11g18600	retrotransposon protein, putative, Ty3-gypsy subclass, expressed
D or OD	>=3	SBP	GO:0044260	P	cellular macromolecule metabolic process	708	1632	9350	24075	0.00016	0.04	LOC_Os08g24730	retrotransposon protein, putative, unclassified, expressed
D or OD	>=3	SBP	GO:0044260	P	cellular macromolecule metabolic process	708	1632	9350	24075	0.00016	0.04	LOC_Os06g39020	retrotransposon protein, putative, unclassified, expressed
D or OD	>=3	SBP	GO:0044260	P	cellular macromolecule metabolic process	708	1632	9350	24075	0.00016	0.04	LOC_Os08g25220	retrotransposon protein, putative, unclassified, expressed
D or OD	>=3	SBP	GO:0044260	P	cellular macromolecule metabolic process	708	1632	9350	24075	0.00016	0.04	LOC_Os06g42980	retrotransposon protein, putative, unclassified, expressed
D or OD	>=3	SBP	GO:0044260	P	cellular macromolecule metabolic process	708	1632	9350	24075	0.00016	0.04	LOC_Os01g60380	retrotransposon protein, putative, Ty3-gypsy subclass, expressed
D or OD	>=3	SBP	GO:0044260	P	cellular macromolecule metabolic process	708	1632	9350	24075	0.00016	0.04	LOC_Os08g38940	retrotransposon protein, putative, Ty3-gypsy subclass, expressed
D or OD	>=3	SBP	GO:0044260	P	cellular macromolecule metabolic process	708	1632	9350	24075	0.00016	0.04	LOC_Os07g38640	inactive receptor kinase At2g26730 precursor, putative, expressed
D or OD	>=3	SBP	GO:0044260	P	cellular macromolecule metabolic process	708	1632	9350	24075	0.00016	0.04	LOC_Os02g43740	AGC_PVPK_like_kin82y.6 - ACG kinases include homologs to PKA, PKG and PKC, expressed
D or OD	>=3	SBP	GO:0044260	P	cellular macromolecule metabolic process	708	1632	9350	24075	0.00016	0.04	LOC_Os10g21950	retrotransposon protein, putative, Ty1-copia subclass, expressed
D or OD	>=3	SBP	GO:0044260	P	cellular macromolecule metabolic process	708	1632	9350	24075	0.00016	0.04	LOC_Os01g60220	transposon protein, putative, unclassified, expressed
D or OD	>=3	SBP	GO:0044260	P	cellular macromolecule metabolic process	708	1632	9350	24075	0.00016	0.04	LOC_Os06g43340	retrotransposon protein, putative, unclassified, expressed
D or OD	>=3	SBP	GO:0044260	P	cellular macromolecule metabolic process	708	1632	9350	24075	0.00016	0.04	LOC_Os10g11672	retrotransposon protein, putative, Ty3-gypsy subclass, expressed
D or OD	>=3	SBP	GO:0044260	P	cellular macromolecule metabolic process	708	1632	9350	24075	0.00016	0.04	LOC_Os03g34250	retrotransposon protein, putative, unclassified
D or OD	>=3	SBP	GO:0044260	P	cellular macromolecule metabolic process	708	1632	9350	24075	0.00016	0.04	LOC_Os01g60540	WRKY20, expressed
D or OD	>=3	SBP	GO:0044260	P	cellular macromolecule metabolic process	708	1632	9350	24075	0.00016	0.04	LOC_Os07g23050	retrotransposon protein, putative, unclassified, expressed
D or OD	>=3	SBP	GO:0044260	P	cellular macromolecule metabolic process	708	1632	9350	24075	0.00016	0.04	LOC_Os02g44136	retrotransposon protein, putative, Ty1-copia subclass, expressed
D or OD	>=3	SBP	GO:0044260	P	cellular macromolecule metabolic process	708	1632	9350	24075	0.00016	0.04	LOC_Os02g43930	chaperone protein dnaJ, putative, expressed
D or OD	>=3	SBP	GO:0044260	P	cellular macromolecule metabolic process	708	1632	9350	24075	0.00016	0.04	LOC_Os01g58760	bZIP transcription factor domain containing protein, expressed
D or OD	>=3	SBP	GO:0044260	P	cellular macromolecule metabolic process	708	1632	9350	24075	0.00016	0.04	LOC_Os01g59730	ribosomal protein L7Ae, putative, expressed
D or OD	>=3	SBP	GO:0044260	P	cellular macromolecule metabolic process	708	1632	9350	24075	0.00016	0.04	LOC_Os03g03020	L11 domain containing ribosomal protein, putative, expressed
D or OD	>=3	SBP	GO:0044260	P	cellular macromolecule metabolic process	708	1632	9350	24075	0.00016	0.04	LOC_Os08g24060	retrotransposon protein, putative, unclassified
D or OD	>=3	SBP	GO:0044260	P	cellular macromolecule metabolic process	708	1632	9350	24075	0.00016	0.04	LOC_Os08g38930	retrotransposon protein, putative, Ty3-gypsy subclass
D or OD	>=3	SBP	GO:0044260	P	cellular macromolecule metabolic process	708	1632	9350	24075	0.00016	0.04	LOC_Os09g19510	senescence-induced receptor-like serine/threonine-protein kinase precursor, putative, expressed
D or OD	>=3	SBP	GO:0044260	P	cellular macromolecule metabolic process	708	1632	9350	24075	0.00016	0.04	LOC_Os04g06080	retrotransposon protein, putative, Ty3-gypsy subclass, expressed
D or OD	>=3	SBP	GO:0044260	P	cellular macromolecule metabolic process	708	1632	9350	24075	0.00016	0.04	LOC_Os01g11450	retrotransposon protein, putative, Ty1-copia subclass, expressed
D or OD	>=3	SBP	GO:0044260	P	cellular macromolecule metabolic process	708	1632	9350	24075	0.00016	0.04	LOC_Os06g38220	retrotransposon protein, putative, unclassified
D or OD	>=3	SBP	GO:0044260	P	cellular macromolecule metabolic process	708	1632	9350	24075	0.00016	0.04	LOC_Os03g02260	DnaK family protein, putative, expressed
D or OD	>=3	SBP	GO:0044260	P	cellular macromolecule metabolic process	708	1632	9350	24075	0.00016	0.04	LOC_Os07g25340	retrotransposon protein, putative, unclassified, expressed
D or OD	>=3	SBP	GO:0044260	P	cellular macromolecule metabolic process	708	1632	9350	24075	0.00016	0.04	LOC_Os08g39180	OsWAK73 - OsWAK receptor-like protein kinase, expressed
D or OD	>=3	SBP	GO:0044260	P	cellular macromolecule metabolic process	708	1632	9350	24075	0.00016	0.04	LOC_Os01g12440	AP2 domain containing protein, expressed
D or OD	>=3	SBP	GO:0044260	P	cellular macromolecule metabolic process	708	1632	9350	24075	0.00016	0.04	LOC_Os07g23220	retrotransposon protein, putative, unclassified, expressed
D or OD	>=3	SBP	GO:0044260	P	cellular macromolecule metabolic process	708	1632	9350	24075	0.00016	0.04	LOC_Os07g24110	retrotransposon protein, putative, Ty1-copia subclass, expressed
D or OD	>=3	SBP	GO:0044260	P	cellular macromolecule metabolic process	708	1632	9350	24075	0.00016	0.04	LOC_Os01g59230	retrotransposon protein, putative, unclassified, expressed
D or OD	>=3	SBP	GO:0044260	P	cellular macromolecule metabolic process	708	1632	9350	24075	0.00016	0.04	LOC_Os07g24440	retrotransposon protein, putative, Ty3-gypsy subclass, expressed
D or OD	>=3	SBP	GO:0044260	P	cellular macromolecule metabolic process	708	1632	9350	24075	0.00016	0.04	LOC_Os12g32420	retrotransposon protein, putative, unclassified, expressed
D or OD	>=3	SBP	GO:0044260	P	cellular macromolecule metabolic process	708	1632	9350	24075	0.00016	0.04	LOC_Os07g33260	transposon protein, putative, unclassified, expressed
D or OD	>=3	SBP	GO:0044260	P	cellular macromolecule metabolic process	708	1632	9350	24075	0.00016	0.04	LOC_Os01g02440	Ser/Thr receptor-like kinase, putative, expressed
D or OD	>=3	SBP	GO:0044260	P	cellular macromolecule metabolic process	708	1632	9350	24075	0.00016	0.04	LOC_Os07g38750	AP2 domain containing protein, expressed
D or OD	>=3	SBP	GO:0044260	P	cellular macromolecule metabolic process	708	1632	9350	24075	0.00016	0.04	LOC_Os01g59580	retrotransposon protein, putative, unclassified, expressed
D or OD	>=3	SBP	GO:0044260	P	cellular macromolecule metabolic process	708	1632	9350	24075	0.00016	0.04	LOC_Os06g51070	no apical meristem protein, putative, expressed
D or OD	>=3	SBP	GO:0044260	P	cellular macromolecule metabolic process	708	1632	9350	24075	0.00016	0.04	LOC_Os02g43940	AP2 domain containing protein, expressed
D or OD	>=3	SBP	GO:0044260	P	cellular macromolecule metabolic process	708	1632	9350	24075	0.00016	0.04	LOC_Os06g51170	serine/threonine-protein kinase Cx32, chloroplast precursor, putative, expressed
D or OD	>=3	SBP	GO:0044260	P	cellular macromolecule metabolic process	708	1632	9350	24075	0.00016	0.04	LOC_Os01g58690	endonuclease/exonuclease/phosphatase family domain containing protein, expressed
D or OD	>=3	SBP	GO:0044260	P	cellular macromolecule metabolic process	708	1632	9350	24075	0.00016	0.04	LOC_Os09g34010	expressed protein
D or OD	>=3	SBP	GO:0044260	P	cellular macromolecule metabolic process	708	1632	9350	24075	0.00016	0.04	LOC_Os03g27390	CPuORF35 - conserved peptide uORF-containing transcript, expressed
D or OD	>=3	SBP	GO:0044260	P	cellular macromolecule metabolic process	708	1632	9350	24075	0.00016	0.04	LOC_Os04g05520	transposon protein, putative, unclassified, expressed
D or OD	>=3	SBP	GO:0044260	P	cellular macromolecule metabolic process	708	1632	9350	24075	0.00016	0.04	LOC_Os01g12430	receptor-like protein kinase, putative, expressed
D or OD	>=3	SBP	GO:0044260	P	cellular macromolecule metabolic process	708	1632	9350	24075	0.00016	0.04	LOC_Os07g24590	retrotransposon protein, putative, unclassified, expressed
D or OD	>=3	SBP	GO:0044260	P	cellular macromolecule metabolic process	708	1632	9350	24075	0.00016	0.04	LOC_Os07g17770	tryptophanyl-tRNA synthetase, cytoplasmic, putative, expressed
D or OD	>=3	SBP	GO:0044260	P	cellular macromolecule metabolic process	708	1632	9350	24075	0.00016	0.04	LOC_Os03g03280	TKL_IRAK_CrRLK1L-1.6 - The CrRLK1L-1 subfamily has homology to the CrRLK1L homolog, expressed
D or OD	>=3	SBP	GO:0044260	P	cellular macromolecule metabolic process	708	1632	9350	24075	0.00016	0.04	LOC_Os01g11200	transforming protein myb, putative, expressed
D or OD	>=3	SBP	GO:0044260	P	cellular macromolecule metabolic process	708	1632	9350	24075	0.00016	0.04	LOC_Os06g39920	retrotransposon protein, putative, unclassified, expressed
D or OD	>=3	SBP	GO:0044260	P	cellular macromolecule metabolic process	708	1632	9350	24075	0.00016	0.04	LOC_Os06g38820	retrotransposon protein, putative, Ty1-copia subclass, expressed
D or OD	>=3	SBP	GO:0044260	P	cellular macromolecule metabolic process	708	1632	9350	24075	0.00016	0.04	LOC_Os11g25280	retrotransposon protein, putative, unclassified
D or OD	>=3	SBP	GO:0044260	P	cellular macromolecule metabolic process	708	1632	9350	24075	0.00016	0.04	LOC_Os06g49940	retrotransposon protein, putative, unclassified, expressed
D or OD	>=3	SBP	GO:0044260	P	cellular macromolecule metabolic process	708	1632	9350	24075	0.00016	0.04	LOC_Os04g29130	retrotransposon protein, putative, unclassified
D or OD	>=3	SBP	GO:0044260	P	cellular macromolecule metabolic process	708	1632	9350	24075	0.00016	0.04	LOC_Os09g19140	senescence-induced receptor-like serine/threonine-protein kinase precursor, putative, expressed
D or OD	>=3	SBP	GO:0044260	P	cellular macromolecule metabolic process	708	1632	9350	24075	0.00016	0.04	LOC_Os04g06144	retrotransposon protein, putative, Ty3-gypsy subclass, expressed
D or OD	>=3	SBP	GO:0044260	P	cellular macromolecule metabolic process	708	1632	9350	24075	0.00016	0.04	LOC_Os03g02500	retrotransposon protein, putative, Ty1-copia subclass, expressed
D or OD	>=3	SBP	GO:0044260	P	cellular macromolecule metabolic process	708	1632	9350	24075	0.00016	0.04	LOC_Os08g24400	SWP, putative, expressed
D or OD	>=3	SBP	GO:0044260	P	cellular macromolecule metabolic process	708	1632	9350	24075	0.00016	0.04	LOC_Os10g34740	methyltransferase, putative, expressed
D or OD	>=3	SBP	GO:0044260	P	cellular macromolecule metabolic process	708	1632	9350	24075	0.00016	0.04	LOC_Os04g06220	retrotransposon protein, putative, Ty1-copia subclass, expressed
D or OD	>=3	SBP	GO:0044260	P	cellular macromolecule metabolic process	708	1632	9350	24075	0.00016	0.04	LOC_Os03g35700	retrotransposon protein, putative, Ty3-gypsy subclass
D or OD	>=3	SBP	GO:0044260	P	cellular macromolecule metabolic process	708	1632	9350	24075	0.00016	0.04	LOC_Os04g04330	receptor-like protein kinase 2 precursor, putative, expressed
D or OD	>=3	SBP	GO:0044260	P	cellular macromolecule metabolic process	708	1632	9350	24075	0.00016	0.04	LOC_Os06g39190	retrotransposon protein, putative, unclassified, expressed
D or OD	>=3	SBP	GO:0044260	P	cellular macromolecule metabolic process	708	1632	9350	24075	0.00016	0.04	LOC_Os08g24560	retrotransposon protein, putative, Ty3-gypsy subclass, expressed
D or OD	>=3	SBP	GO:0044260	P	cellular macromolecule metabolic process	708	1632	9350	24075	0.00016	0.04	LOC_Os07g23830	retrotransposon protein, putative, unclassified, expressed
D or OD	>=3	SBP	GO:0044260	P	cellular macromolecule metabolic process	708	1632	9350	24075	0.00016	0.04	LOC_Os07g22930	starch synthase, putative, expressed
D or OD	>=3	SBP	GO:0044260	P	cellular macromolecule metabolic process	708	1632	9350	24075	0.00016	0.04	LOC_Os01g60360	ubiquitin-conjugating enzyme, putative, expressed
D or OD	>=3	SBP	GO:0044260	P	cellular macromolecule metabolic process	708	1632	9350	24075	0.00016	0.04	LOC_Os06g06960	S-locus-like receptor protein kinase, putative, expressed
D or OD	>=3	SBP	GO:0044260	P	cellular macromolecule metabolic process	708	1632	9350	24075	0.00016	0.04	LOC_Os06g41500	D-mannose binding lectin family protein, expressed
D or OD	>=3	SBP	GO:0044260	P	cellular macromolecule metabolic process	708	1632	9350	24075	0.00016	0.04	LOC_Os09g07420	retrotransposon protein, putative, unclassified, expressed
D or OD	>=3	SBP	GO:0044260	P	cellular macromolecule metabolic process	708	1632	9350	24075	0.00016	0.04	LOC_Os06g39600	protein phosphatase 2C, putative, expressed
D or OD	>=3	SBP	GO:0044260	P	cellular macromolecule metabolic process	708	1632	9350	24075	0.00016	0.04	LOC_Os06g50100	tyrosine protein kinase domain containing protein, putative, expressed
D or OD	>=3	SBP	GO:0044260	P	cellular macromolecule metabolic process	708	1632	9350	24075	0.00016	0.04	LOC_Os01g02430	TAK14, putative, expressed
D or OD	>=3	SBP	GO:0044260	P	cellular macromolecule metabolic process	708	1632	9350	24075	0.00016	0.04	LOC_Os01g11510	OsMADS91 - MADS-box family gene with M-beta type-box, expressed
D or OD	>=3	SBP	GO:0044260	P	cellular macromolecule metabolic process	708	1632	9350	24075	0.00016	0.04	LOC_Os01g59510	chloroplast ribonuclease III domain protein, putative, expressed
D or OD	>=3	SBP	GO:0044260	P	cellular macromolecule metabolic process	708	1632	9350	24075	0.00016	0.04	LOC_Os06g38730	receptor-like protein kinase precursor, putative, expressed
D or OD	>=3	SBP	GO:0044260	P	cellular macromolecule metabolic process	708	1632	9350	24075	0.00016	0.04	LOC_Os06g50190	retrotransposon protein, putative, unclassified, expressed
D or OD	>=3	SBP	GO:0044260	P	cellular macromolecule metabolic process	708	1632	9350	24075	0.00016	0.04	LOC_Os06g40260	retrotransposon protein, putative, Ty3-gypsy subclass, expressed
D or OD	>=3	SBP	GO:0044260	P	cellular macromolecule metabolic process	708	1632	9350	24075	0.00016	0.04	LOC_Os07g38800	lectin-like receptor kinase, putative, expressed
D or OD	>=3	SBP	GO:0044260	P	cellular macromolecule metabolic process	708	1632	9350	24075	0.00016	0.04	LOC_Os03g26210	helix-loop-helix DNA-binding domain containing protein, expressed
D or OD	>=3	SBP	GO:0044260	P	cellular macromolecule metabolic process	708	1632	9350	24075	0.00016	0.04	LOC_Os03g35454	retrotransposon protein, putative, unclassified, expressed
D or OD	>=3	SBP	GO:0044260	P	cellular macromolecule metabolic process	708	1632	9350	24075	0.00016	0.04	LOC_Os07g22730	AP2 domain containing protein, expressed
D or OD	>=3	SBP	GO:0044260	P	cellular macromolecule metabolic process	708	1632	9350	24075	0.00016	0.04	LOC_Os12g33600	expressed protein
D or OD	>=3	SBP	GO:0044260	P	cellular macromolecule metabolic process	708	1632	9350	24075	0.00016	0.04	LOC_Os09g34000	expressed protein
D or OD	>=3	SBP	GO:0044260	P	cellular macromolecule metabolic process	708	1632	9350	24075	0.00016	0.04	LOC_Os06g42800	STRUBBELIG-RECEPTOR FAMILY 8 precursor, putative, expressed
D or OD	>=3	SBP	GO:0044260	P	cellular macromolecule metabolic process	708	1632	9350	24075	0.00016	0.04	LOC_Os03g03210	retrotransposon protein, putative, Ty3-gypsy subclass, expressed
D or OD	>=3	SBP	GO:0044260	P	cellular macromolecule metabolic process	708	1632	9350	24075	0.00016	0.04	LOC_Os06g39990	retrotransposon protein, putative, unclassified, expressed
D or OD	>=3	SBP	GO:0044260	P	cellular macromolecule metabolic process	708	1632	9350	24075	0.00016	0.04	LOC_Os09g07060	retrotransposon protein, putative, unclassified, expressed
D or OD	>=3	SBP	GO:0044260	P	cellular macromolecule metabolic process	708	1632	9350	24075	0.00016	0.04	LOC_Os08g24310	receptor-like protein kinase precursor, putative, expressed
D or OD	>=3	SBP	GO:0044260	P	cellular macromolecule metabolic process	708	1632	9350	24075	0.00016	0.04	LOC_Os01g59780	AP2 domain containing protein, expressed
D or OD	>=3	SBP	GO:0044260	P	cellular macromolecule metabolic process	708	1632	9350	24075	0.00016	0.04	LOC_Os01g10700	D-mannose binding lectin family protein, expressed
D or OD	>=3	SBP	GO:0044260	P	cellular macromolecule metabolic process	708	1632	9350	24075	0.00016	0.04	LOC_Os03g32960	retrotransposon protein, putative, Ty3-gypsy subclass, expressed
D or OD	>=3	SBP	GO:0044260	P	cellular macromolecule metabolic process	708	1632	9350	24075	0.00016	0.04	LOC_Os09g19560	methyltransferase, putative, expressed
D or OD	>=3	SBP	GO:0044260	P	cellular macromolecule metabolic process	708	1632	9350	24075	0.00016	0.04	LOC_Os03g15440	basic helix-loop-helix, putative, expressed
D or OD	>=3	SBP	GO:0044260	P	cellular macromolecule metabolic process	708	1632	9350	24075	0.00016	0.04	LOC_Os01g42294	inactive receptor kinase At2g26730 precursor, putative, expressed
D or OD	>=3	SBP	GO:0044260	P	cellular macromolecule metabolic process	708	1632	9350	24075	0.00016	0.04	LOC_Os07g24700	retrotransposon protein, putative, Ty3-gypsy subclass, expressed
D or OD	>=3	SBP	GO:0044260	P	cellular macromolecule metabolic process	708	1632	9350	24075	0.00016	0.04	LOC_Os02g44070	retrotransposon protein, putative, unclassified, expressed
D or OD	>=3	SBP	GO:0044260	P	cellular macromolecule metabolic process	708	1632	9350	24075	0.00016	0.04	LOC_Os01g23020	retrotransposon protein, putative, Ty3-gypsy subclass, expressed
D or OD	>=3	SBP	GO:0044260	P	cellular macromolecule metabolic process	708	1632	9350	24075	0.00016	0.04	LOC_Os08g24690	retrotransposon protein, putative, unclassified, expressed
D or OD	>=3	SBP	GO:0044260	P	cellular macromolecule metabolic process	708	1632	9350	24075	0.00016	0.04	LOC_Os07g22410	retrotransposon protein, putative, Ty3-gypsy subclass, expressed
D or OD	>=3	SBP	GO:0044260	P	cellular macromolecule metabolic process	708	1632	9350	24075	0.00016	0.04	LOC_Os01g11140	retrotransposon protein, putative, unclassified, expressed
D or OD	>=3	SBP	GO:0044260	P	cellular macromolecule metabolic process	708	1632	9350	24075	0.00016	0.04	LOC_Os01g02530	retrotransposon protein, putative, unclassified, expressed
D or OD	>=3	SBP	GO:0044260	P	cellular macromolecule metabolic process	708	1632	9350	24075	0.00016	0.04	LOC_Os07g22420	retrotransposon protein, putative, Ty3-gypsy subclass, expressed
D or OD	>=3	SBP	GO:0044260	P	cellular macromolecule metabolic process	708	1632	9350	24075	0.00016	0.04	LOC_Os03g24360	transposon protein, putative, unclassified, expressed
D or OD	>=3	SBP	GO:0044260	P	cellular macromolecule metabolic process	708	1632	9350	24075	0.00016	0.04	LOC_Os03g03100	OsMADS50 - MADS-box family gene with MIKCc type-box, expressed
D or OD	>=3	SBP	GO:0044260	P	cellular macromolecule metabolic process	708	1632	9350	24075	0.00016	0.04	LOC_Os08g24990	retrotransposon protein, putative, Ty3-gypsy subclass, expressed
D or OD	>=3	SBP	GO:0044260	P	cellular macromolecule metabolic process	708	1632	9350	24075	0.00016	0.04	LOC_Os07g25014	chloroplast 50S ribosomal protein L23, putative
D or OD	>=3	SBP	GO:0044260	P	cellular macromolecule metabolic process	708	1632	9350	24075	0.00016	0.04	LOC_Os07g25010	retrotransposon protein, putative, Ty3-gypsy subclass, expressed
D or OD	>=3	SBP	GO:0044260	P	cellular macromolecule metabolic process	708	1632	9350	24075	0.00016	0.04	LOC_Os03g03260	homeobox domain containing protein, expressed
D or OD	>=3	SBP	GO:0044260	P	cellular macromolecule metabolic process	708	1632	9350	24075	0.00016	0.04	LOC_Os06g47750	phytosulfokine receptor precursor, putative, expressed
D or OD	>=3	SBP	GO:0044260	P	cellular macromolecule metabolic process	708	1632	9350	24075	0.00016	0.04	LOC_Os08g24220	retrotransposon protein, putative, Ty3-gypsy subclass, expressed
D or OD	>=3	SBP	GO:0044260	P	cellular macromolecule metabolic process	708	1632	9350	24075	0.00016	0.04	LOC_Os07g24520	retrotransposon protein, putative, Ty3-gypsy subclass, expressed
D or OD	>=3	SBP	GO:0044260	P	cellular macromolecule metabolic process	708	1632	9350	24075	0.00016	0.04	LOC_Os03g25890	retrotransposon protein, putative, unclassified, expressed
D or OD	>=3	SBP	GO:0044260	P	cellular macromolecule metabolic process	708	1632	9350	24075	0.00016	0.04	LOC_Os08g24500	retrotransposon protein, putative, Ty3-gypsy subclass, expressed
D or OD	>=3	SBP	GO:0044260	P	cellular macromolecule metabolic process	708	1632	9350	24075	0.00016	0.04	LOC_Os06g50270	retrotransposon protein, putative, Ty3-gypsy subclass, expressed
D or OD	>=3	SBP	GO:0044260	P	cellular macromolecule metabolic process	708	1632	9350	24075	0.00016	0.04	LOC_Os06g49170	OsWAK64 - OsWAK receptor-like protein kinase, expressed
D or OD	>=3	SBP	GO:0044260	P	cellular macromolecule metabolic process	708	1632	9350	24075	0.00016	0.04	LOC_Os02g44180	retrotransposon protein, putative, Ty3-gypsy subclass, expressed
D or OD	>=3	SBP	GO:0044260	P	cellular macromolecule metabolic process	708	1632	9350	24075	0.00016	0.04	LOC_Os01g12400	S-locus lectin protein kinase family protein, putative, expressed
D or OD	>=3	SBP	GO:0044260	P	cellular macromolecule metabolic process	708	1632	9350	24075	0.00016	0.04	LOC_Os07g32650	retrotransposon protein, putative, unclassified, expressed
D or OD	>=3	SBP	GO:0044260	P	cellular macromolecule metabolic process	708	1632	9350	24075	0.00016	0.04	LOC_Os06g50900	expressed protein
D or OD	>=3	SBP	GO:0044260	P	cellular macromolecule metabolic process	708	1632	9350	24075	0.00016	0.04	LOC_Os03g33700	retrotransposon protein, putative, unclassified, expressed
D or OD	>=3	SBP	GO:0044260	P	cellular macromolecule metabolic process	708	1632	9350	24075	0.00016	0.04	LOC_Os03g33250	retrotransposon protein, putative, Ty3-gypsy subclass, expressed
D or OD	>=3	SBP	GO:0044260	P	cellular macromolecule metabolic process	708	1632	9350	24075	0.00016	0.04	LOC_Os06g49870	tRNA-dihydrouridine synthase, putative, expressed
D or OD	>=3	SBP	GO:0044260	P	cellular macromolecule metabolic process	708	1632	9350	24075	0.00016	0.04	LOC_Os07g24400	retrotransposon protein, putative, Ty3-gypsy subclass, expressed
D or OD	>=3	SBP	GO:0044260	P	cellular macromolecule metabolic process	708	1632	9350	24075	0.00016	0.04	LOC_Os07g23300	retrotransposon protein, putative, unclassified, expressed
D or OD	>=3	SBP	GO:0044260	P	cellular macromolecule metabolic process	708	1632	9350	24075	0.00016	0.04	LOC_Os01g02560	Ser/Thr receptor-like kinase, putative, expressed
D or OD	>=3	SBP	GO:0044260	P	cellular macromolecule metabolic process	708	1632	9350	24075	0.00016	0.04	LOC_Os04g06360	retrotransposon protein, putative, Ty3-gypsy subclass, expressed
D or OD	>=3	SBP	GO:0044260	P	cellular macromolecule metabolic process	708	1632	9350	24075	0.00016	0.04	LOC_Os06g51130	spotted leaf 11, putative, expressed
D or OD	>=3	SBP	GO:0044260	P	cellular macromolecule metabolic process	708	1632	9350	24075	0.00016	0.04	LOC_Os03g28300	protein kinase domain containing protein, expressed
D or OD	>=3	SBP	GO:0044260	P	cellular macromolecule metabolic process	708	1632	9350	24075	0.00016	0.04	LOC_Os08g25190	retrotransposon protein, putative, unclassified, expressed
D or OD	>=3	SBP	GO:0044260	P	cellular macromolecule metabolic process	708	1632	9350	24075	0.00016	0.04	LOC_Os01g10450	protein kinase domain containing protein, expressed
D or OD	>=3	SBP	GO:0044260	P	cellular macromolecule metabolic process	708	1632	9350	24075	0.00016	0.04	LOC_Os07g22800	retrotransposon protein, putative, Ty1-copia subclass, expressed
D or OD	>=3	SBP	GO:0044260	P	cellular macromolecule metabolic process	708	1632	9350	24075	0.00016	0.04	LOC_Os01g23090	retrotransposon protein, putative, Ty1-copia subclass, expressed
D or OD	>=3	SBP	GO:0044260	P	cellular macromolecule metabolic process	708	1632	9350	24075	0.00016	0.04	LOC_Os04g29469	retrotransposon protein, putative, unclassified, expressed
D or OD	>=3	SBP	GO:0044260	P	cellular macromolecule metabolic process	708	1632	9350	24075	0.00016	0.04	LOC_Os07g25330	retrotransposon protein, putative, Ty3-gypsy subclass, expressed
D or OD	>=3	SBP	GO:0044260	P	cellular macromolecule metabolic process	708	1632	9350	24075	0.00016	0.04	LOC_Os12g30060	prefoldin subunit, putative, expressed
D or OD	>=3	SBP	GO:0044260	P	cellular macromolecule metabolic process	708	1632	9350	24075	0.00016	0.04	LOC_Os07g24240	retrotransposon protein, putative, Ty3-gypsy subclass, expressed
D or OD	>=3	SBP	GO:0044260	P	cellular macromolecule metabolic process	708	1632	9350	24075	0.00016	0.04	LOC_Os07g24530	retrotransposon protein, putative, unclassified
D or OD	>=3	SBP	GO:0044260	P	cellular macromolecule metabolic process	708	1632	9350	24075	0.00016	0.04	LOC_Os09g28354	CPuORF39 - conserved peptide uORF-containing transcript, expressed
D or OD	>=3	SBP	GO:0044260	P	cellular macromolecule metabolic process	708	1632	9350	24075	0.00016	0.04	LOC_Os04g04880	retrotransposon protein, putative, Ty3-gypsy subclass, expressed
D or OD	>=3	SBP	GO:0044260	P	cellular macromolecule metabolic process	708	1632	9350	24075	0.00016	0.04	LOC_Os06g06920	S-locus-like receptor protein kinase, putative, expressed
D or OD	>=3	SBP	GO:0044260	P	cellular macromolecule metabolic process	708	1632	9350	24075	0.00016	0.04	LOC_Os06g49260	OsWAK65 - OsWAK receptor-like protein kinase, expressed
D or OD	>=3	SBP	GO:0044260	P	cellular macromolecule metabolic process	708	1632	9350	24075	0.00016	0.04	LOC_Os07g24100	retrotransposon protein, putative, unclassified, expressed
D or OD	>=3	SBP	GO:0044260	P	cellular macromolecule metabolic process	708	1632	9350	24075	0.00016	0.04	LOC_Os06g39310	retrotransposon protein, putative, unclassified
D or OD	>=3	SBP	GO:0044260	P	cellular macromolecule metabolic process	708	1632	9350	24075	0.00016	0.04	LOC_Os01g60280	ATP binding protein, putative, expressed
D or OD	>=3	SBP	GO:0044260	P	cellular macromolecule metabolic process	708	1632	9350	24075	0.00016	0.04	LOC_Os04g06310	retrotransposon protein, putative, unclassified, expressed
D or OD	>=3	SBP	GO:0044260	P	cellular macromolecule metabolic process	708	1632	9350	24075	0.00016	0.04	LOC_Os01g59550	senescence-induced receptor-like serine/threonine-protein kinase precursor, putative, expressed
D or OD	>=3	SBP	GO:0044260	P	cellular macromolecule metabolic process	708	1632	9350	24075	0.00016	0.04	LOC_Os06g49270	retrotransposon protein, putative, Ty1-copia subclass, expressed
D or OD	>=3	SBP	GO:0044260	P	cellular macromolecule metabolic process	708	1632	9350	24075	0.00016	0.04	LOC_Os06g38920	transposon protein, putative, CACTA, En/Spm sub-class, expressed
D or OD	>=3	SBP	GO:0044260	P	cellular macromolecule metabolic process	708	1632	9350	24075	0.00016	0.04	LOC_Os06g38670	receptor-like protein kinase precursor, putative, expressed
D or OD	>=3	SBP	GO:0044260	P	cellular macromolecule metabolic process	708	1632	9350	24075	0.00016	0.04	LOC_Os11g25070	retrotransposon protein, putative, unclassified, expressed
D or OD	>=3	SBP	GO:0044260	P	cellular macromolecule metabolic process	708	1632	9350	24075	0.00016	0.04	LOC_Os06g50830	bZIP transcription factor domain containing protein, expressed
D or OD	>=3	SBP	GO:0044260	P	cellular macromolecule metabolic process	708	1632	9350	24075	0.00016	0.04	LOC_Os04g29380	retrotransposon protein, putative, unclassified, expressed
D or OD	>=3	SBP	GO:0044260	P	cellular macromolecule metabolic process	708	1632	9350	24075	0.00016	0.04	LOC_Os04g32950	calreticulin precursor protein, putative, expressed
D or OD	>=3	SBP	GO:0044260	P	cellular macromolecule metabolic process	708	1632	9350	24075	0.00016	0.04	LOC_Os06g50310	E2F-related protein, putative, expressed
D or OD	>=3	SBP	GO:0044260	P	cellular macromolecule metabolic process	708	1632	9350	24075	0.00016	0.04	LOC_Os02g45250	homeobox and START domains containing protein, putative, expressed
D or OD	>=3	SBP	GO:0044260	P	cellular macromolecule metabolic process	708	1632	9350	24075	0.00016	0.04	LOC_Os06g38400	retrotransposon protein, putative, Ty1-copia subclass, expressed
D or OD	>=3	SBP	GO:0044260	P	cellular macromolecule metabolic process	708	1632	9350	24075	0.00016	0.04	LOC_Os08g09840	WRKY117, expressed
D or OD	>=3	SBP	GO:0044260	P	cellular macromolecule metabolic process	708	1632	9350	24075	0.00016	0.04	LOC_Os09g35020	AP2 domain containing protein, expressed
D or OD	>=3	SBP	GO:0044260	P	cellular macromolecule metabolic process	708	1632	9350	24075	0.00016	0.04	LOC_Os04g29140	retrotransposon protein, putative, unclassified
D or OD	>=3	SBP	GO:0044260	P	cellular macromolecule metabolic process	708	1632	9350	24075	0.00016	0.04	LOC_Os01g59009	expressed protein
D or OD	>=3	SBP	GO:0044260	P	cellular macromolecule metabolic process	708	1632	9350	24075	0.00016	0.04	LOC_Os10g34670	prefoldin, putative, expressed
D or OD	>=3	SBP	GO:0044260	P	cellular macromolecule metabolic process	708	1632	9350	24075	0.00016	0.04	LOC_Os03g27140	retrotransposon protein, putative, unclassified, expressed
D or OD	>=3	SBP	GO:0044260	P	cellular macromolecule metabolic process	708	1632	9350	24075	0.00016	0.04	LOC_Os03g15140	retrotransposon protein, putative, unclassified, expressed
D or OD	>=3	SBP	GO:0044260	P	cellular macromolecule metabolic process	708	1632	9350	24075	0.00016	0.04	LOC_Os04g53040	retrotransposon protein, putative, unclassified, expressed
D or OD	>=3	SBP	GO:0044260	P	cellular macromolecule metabolic process	708	1632	9350	24075	0.00016	0.04	LOC_Os06g39480	SPOC domain containing protein, putative, expressed
D or OD	>=3	SBP	GO:0044260	P	cellular macromolecule metabolic process	708	1632	9350	24075	0.00016	0.04	LOC_Os07g23840	retrotransposon protein, putative, unclassified, expressed
D or OD	>=3	SBP	GO:0044260	P	cellular macromolecule metabolic process	708	1632	9350	24075	0.00016	0.04	LOC_Os06g50380	protein phosphatase 2C, putative, expressed
D or OD	>=3	SBP	GO:0044260	P	cellular macromolecule metabolic process	708	1632	9350	24075	0.00016	0.04	LOC_Os06g38490	retrotransposon protein, putative, unclassified, expressed
D or OD	>=3	SBP	GO:0044260	P	cellular macromolecule metabolic process	708	1632	9350	24075	0.00016	0.04	LOC_Os02g44410	retrotransposon protein, putative, unclassified, expressed
D or OD	>=3	SBP	GO:0044260	P	cellular macromolecule metabolic process	708	1632	9350	24075	0.00016	0.04	LOC_Os07g17630	retrotransposon protein, putative, Ty3-gypsy subclass, expressed
D or OD	>=3	SBP	GO:0044260	P	cellular macromolecule metabolic process	708	1632	9350	24075	0.00016	0.04	LOC_Os04g05370	retrotransposon protein, putative, unclassified, expressed
D or OD	>=3	SBP	GO:0044260	P	cellular macromolecule metabolic process	708	1632	9350	24075	0.00016	0.04	LOC_Os08g29370	peptidyl-prolyl cis-trans isomerase, chloroplast precursor, putative, expressed
D or OD	>=3	SBP	GO:0044260	P	cellular macromolecule metabolic process	708	1632	9350	24075	0.00016	0.04	LOC_Os07g04190	receptor protein kinase CLAVATA1 precursor, putative, expressed
D or OD	>=3	SBP	GO:0044260	P	cellular macromolecule metabolic process	708	1632	9350	24075	0.00016	0.04	LOC_Os07g23110	poly synthetase 1, putative, expressed
D or OD	>=3	SBP	GO:0044260	P	cellular macromolecule metabolic process	708	1632	9350	24075	0.00016	0.04	LOC_Os03g35560	retrotransposon protein, putative, Ty1-copia subclass, expressed
D or OD	>=3	SBP	GO:0044260	P	cellular macromolecule metabolic process	708	1632	9350	24075	0.00016	0.04	LOC_Os09g33910	CAMK_CAMK_like.39 - CAMK includes calcium/calmodulin depedent protein kinases, expressed
D or OD	>=3	SBP	GO:0044260	P	cellular macromolecule metabolic process	708	1632	9350	24075	0.00016	0.04	LOC_Os07g24990	retrotransposon protein, putative, Ty3-gypsy subclass, expressed
D or OD	>=3	SBP	GO:0044260	P	cellular macromolecule metabolic process	708	1632	9350	24075	0.00016	0.04	LOC_Os01g10840	CGMC_GSK.2 - CGMC includes CDA, MAPK, GSK3, and CLKC kinases, expressed
D or OD	>=3	SBP	GO:0044260	P	cellular macromolecule metabolic process	708	1632	9350	24075	0.00016	0.04	LOC_Os09g19610	retrotransposon protein, putative, unclassified, expressed
D or OD	>=3	SBP	GO:0044260	P	cellular macromolecule metabolic process	708	1632	9350	24075	0.00016	0.04	LOC_Os03g02310	RNA binding protein, putative, expressed
D or OD	>=3	SBP	GO:0044260	P	cellular macromolecule metabolic process	708	1632	9350	24075	0.00016	0.04	LOC_Os01g42040	ubiquitin-conjugating enzyme, putative, expressed
D or OD	>=3	SBP	GO:0044260	P	cellular macromolecule metabolic process	708	1632	9350	24075	0.00016	0.04	LOC_Os12g31560	protein kinase, putative, expressed
D or OD	>=3	SBP	GO:0044260	P	cellular macromolecule metabolic process	708	1632	9350	24075	0.00016	0.04	LOC_Os06g50360	pseudouridine synthase family protein, putative, expressed
D or OD	>=3	SBP	GO:0044260	P	cellular macromolecule metabolic process	708	1632	9350	24075	0.00016	0.04	LOC_Os09g13570	CPuORF2 - conserved peptide uORF-containing transcript, expressed
D or OD	>=3	SBP	GO:0044260	P	cellular macromolecule metabolic process	708	1632	9350	24075	0.00016	0.04	LOC_Os07g38320	retrotransposon protein, putative, Ty3-gypsy subclass
D or OD	>=3	SBP	GO:0044260	P	cellular macromolecule metabolic process	708	1632	9350	24075	0.00016	0.04	LOC_Os09g13575	expressed protein
D or OD	>=3	SBP	GO:0044260	P	cellular macromolecule metabolic process	708	1632	9350	24075	0.00016	0.04	LOC_Os04g06000	transposon protein, putative, CACTA, En/Spm sub-class, expressed
D or OD	>=3	SBP	GO:0044260	P	cellular macromolecule metabolic process	708	1632	9350	24075	0.00016	0.04	LOC_Os04g05730	retrotransposon protein, putative, Ty3-gypsy subclass, expressed
D or OD	>=3	SBP	GO:0044260	P	cellular macromolecule metabolic process	708	1632	9350	24075	0.00016	0.04	LOC_Os04g04510	retrotransposon protein, putative, Ty3-gypsy subclass, expressed
D or OD	>=3	SBP	GO:0044260	P	cellular macromolecule metabolic process	708	1632	9350	24075	0.00016	0.04	LOC_Os06g49130	TAZ zinc finger family protein, expressed
D or OD	>=3	SBP	GO:0044260	P	cellular macromolecule metabolic process	708	1632	9350	24075	0.00016	0.04	LOC_Os03g15660	AP2 domain containing protein, expressed
D or OD	>=3	SBP	GO:0044260	P	cellular macromolecule metabolic process	708	1632	9350	24075	0.00016	0.04	LOC_Os07g24190	CESA3 - cellulose synthase, expressed
D or OD	>=3	SBP	GO:0044260	P	cellular macromolecule metabolic process	708	1632	9350	24075	0.00016	0.04	LOC_Os02g43750	transcription initiation factor, putative, expressed
D or OD	>=3	SBP	GO:0044260	P	cellular macromolecule metabolic process	708	1632	9350	24075	0.00016	0.04	LOC_Os10g11702	retrotransposon protein, putative, Ty3-gypsy subclass, expressed
D or OD	>=3	SBP	GO:0044260	P	cellular macromolecule metabolic process	708	1632	9350	24075	0.00016	0.04	LOC_Os07g25270	retrotransposon protein, putative, Ty3-gypsy subclass, expressed
D or OD	>=3	SBP	GO:0044260	P	cellular macromolecule metabolic process	708	1632	9350	24075	0.00016	0.04	LOC_Os08g26990	response regulator receiver domain containing protein, expressed
D or OD	>=3	SBP	GO:0044260	P	cellular macromolecule metabolic process	708	1632	9350	24075	0.00016	0.04	LOC_Os04g04670	protein kinase, putative, expressed
D or OD	>=3	SBP	GO:0044260	P	cellular macromolecule metabolic process	708	1632	9350	24075	0.00016	0.04	LOC_Os02g44124	retrotransposon protein, putative, unclassified, expressed
D or OD	>=3	SBP	GO:0044260	P	cellular macromolecule metabolic process	708	1632	9350	24075	0.00016	0.04	LOC_Os07g24690	retrotransposon protein, putative, unclassified, expressed
D or OD	>=3	SBP	GO:0044260	P	cellular macromolecule metabolic process	708	1632	9350	24075	0.00016	0.04	LOC_Os06g37670	S-locus-like receptor protein kinase, putative, expressed
D or OD	>=3	SBP	GO:0044260	P	cellular macromolecule metabolic process	708	1632	9350	24075	0.00016	0.04	LOC_Os06g38030	retrotransposon protein, putative, Ty3-gypsy subclass, expressed
D or OD	>=3	SBP	GO:0044260	P	cellular macromolecule metabolic process	708	1632	9350	24075	0.00016	0.04	LOC_Os03g26760	retrotransposon protein, putative, Ty3-gypsy subclass, expressed
D or OD	>=3	SBP	GO:0044260	P	cellular macromolecule metabolic process	708	1632	9350	24075	0.00016	0.04	LOC_Os06g49470	peptidyl-prolyl cis-trans isomerase, putative, expressed
D or OD	>=3	SBP	GO:0044260	P	cellular macromolecule metabolic process	708	1632	9350	24075	0.00016	0.04	LOC_Os03g27090	MYB family transcription factor, putative, expressed
D or OD	>=3	SBP	GO:0044260	P	cellular macromolecule metabolic process	708	1632	9350	24075	0.00016	0.04	LOC_Os03g03130	ubiquitin-conjugating enzyme, putative, expressed
D or OD	>=3	SBP	GO:0044260	P	cellular macromolecule metabolic process	708	1632	9350	24075	0.00016	0.04	LOC_Os12g15650	retrotransposon protein, putative, Ty3-gypsy subclass, expressed
D or OD	>=3	SBP	GO:0044260	P	cellular macromolecule metabolic process	708	1632	9350	24075	0.00016	0.04	LOC_Os01g11920	retrotransposon protein, putative, unclassified, expressed
D or OD	>=3	SBP	GO:0044260	P	cellular macromolecule metabolic process	708	1632	9350	24075	0.00016	0.04	LOC_Os06g47810	retrotransposon protein, putative, Ty1-copia subclass, expressed
D or OD	>=3	SBP	GO:0044260	P	cellular macromolecule metabolic process	708	1632	9350	24075	0.00016	0.04	LOC_Os03g33530	retrotransposon protein, putative, unclassified, expressed
D or OD	>=3	SBP	GO:0044260	P	cellular macromolecule metabolic process	708	1632	9350	24075	0.00016	0.04	LOC_Os04g06090	cysteine-rich receptor-like protein kinase 37 precursor, putative, expressed
D or OD	>=3	SBP	GO:0044260	P	cellular macromolecule metabolic process	708	1632	9350	24075	0.00016	0.04	LOC_Os06g40030	S-locus-like receptor protein kinase, putative, expressed
D or OD	>=3	SBP	GO:0044260	P	cellular macromolecule metabolic process	708	1632	9350	24075	0.00016	0.04	LOC_Os09g31210	AGC_PVPK_like_CDK8.1 - ACG kinases include homologs to PKA, PKG and PKC, expressed
D or OD	>=3	SBP	GO:0044260	P	cellular macromolecule metabolic process	708	1632	9350	24075	0.00016	0.04	LOC_Os02g13180	SKP1, putative, expressed
D or OD	>=3	SBP	GO:0044260	P	cellular macromolecule metabolic process	708	1632	9350	24075	0.00016	0.04	LOC_Os07g17480	retrotransposon protein, putative, unclassified
D or OD	>=3	SBP	GO:0044260	P	cellular macromolecule metabolic process	708	1632	9350	24075	0.00016	0.04	LOC_Os03g34040	ribosomal protein, putative, expressed
D or OD	>=3	SBP	GO:0044260	P	cellular macromolecule metabolic process	708	1632	9350	24075	0.00016	0.04	LOC_Os06g37690	S-locus-like receptor protein kinase, putative, expressed
D or OD	>=3	SBP	GO:0044260	P	cellular macromolecule metabolic process	708	1632	9350	24075	0.00016	0.04	LOC_Os04g05810	retrotransposon protein, putative, unclassified
D or OD	>=3	SBP	GO:0044260	P	cellular macromolecule metabolic process	708	1632	9350	24075	0.00016	0.04	LOC_Os01g59220	retrotransposon protein, putative, unclassified, expressed
D or OD	>=3	SBP	GO:0044260	P	cellular macromolecule metabolic process	708	1632	9350	24075	0.00016	0.04	LOC_Os01g59950	pentatricopeptide repeat-containing protein, putative, expressed
D or OD	>=3	SBP	GO:0044260	P	cellular macromolecule metabolic process	708	1632	9350	24075	0.00016	0.04	LOC_Os04g05200	retrotransposon protein, putative, Ty3-gypsy subclass, expressed
D or OD	>=3	SBP	GO:0044260	P	cellular macromolecule metabolic process	708	1632	9350	24075	0.00016	0.04	LOC_Os07g38420	pre-mRNA-splicing factor, putative, expressed
D or OD	>=3	SBP	GO:0044260	P	cellular macromolecule metabolic process	708	1632	9350	24075	0.00016	0.04	LOC_Os06g38420	retrotransposon protein, putative, Ty3-gypsy subclass, expressed
D or OD	>=3	SBP	GO:0044260	P	cellular macromolecule metabolic process	708	1632	9350	24075	0.00016	0.04	LOC_Os04g06450	retrotransposon protein, putative, Ty3-gypsy subclass, expressed
D or OD	>=3	SBP	GO:0044260	P	cellular macromolecule metabolic process	708	1632	9350	24075	0.00016	0.04	LOC_Os04g24220	OsWAK32 - OsWAK receptor-like protein kinase, expressed
D or OD	>=3	SBP	GO:0044260	P	cellular macromolecule metabolic process	708	1632	9350	24075	0.00016	0.04	LOC_Os06g38100	S-locus-like receptor protein kinase, putative
D or OD	>=3	SBP	GO:0044260	P	cellular macromolecule metabolic process	708	1632	9350	24075	0.00016	0.04	LOC_Os03g26750	retrotransposon protein, putative, Ty3-gypsy subclass, expressed
D or OD	>=3	SBP	GO:0044260	P	cellular macromolecule metabolic process	708	1632	9350	24075	0.00016	0.04	LOC_Os12g16150	retrotransposon protein, putative, Ty3-gypsy subclass, expressed
D or OD	>=3	SBP	GO:0044260	P	cellular macromolecule metabolic process	708	1632	9350	24075	0.00016	0.04	LOC_Os06g50600	bZIP transcription factor domain containing protein, expressed
D or OD	>=3	SBP	GO:0044260	P	cellular macromolecule metabolic process	708	1632	9350	24075	0.00016	0.04	LOC_Os11g18290	retrotransposon protein, putative, unclassified, expressed
D or OD	>=3	SBP	GO:0044260	P	cellular macromolecule metabolic process	708	1632	9350	24075	0.00016	0.04	LOC_Os09g31390	transcription factor, putative, expressed
D or OD	>=3	SBP	GO:0044260	P	cellular macromolecule metabolic process	708	1632	9350	24075	0.00016	0.04	LOC_Os10g22010	retrotransposon protein, putative, unclassified, expressed
D or OD	>=3	SBP	GO:0044260	P	cellular macromolecule metabolic process	708	1632	9350	24075	0.00016	0.04	LOC_Os04g06130	retrotransposon protein, putative, Ty3-gypsy subclass, expressed
D or OD	>=3	SBP	GO:0044260	P	cellular macromolecule metabolic process	708	1632	9350	24075	0.00016	0.04	LOC_Os06g49950	retrotransposon protein, putative, unclassified, expressed
D or OD	>=3	SBP	GO:0044260	P	cellular macromolecule metabolic process	708	1632	9350	24075	0.00016	0.04	LOC_Os03g33960	retrotransposon protein, putative, unclassified
D or OD	>=3	SBP	GO:0044260	P	cellular macromolecule metabolic process	708	1632	9350	24075	0.00016	0.04	LOC_Os03g39450	retrotransposon protein, putative, Ty3-gypsy subclass, expressed
D or OD	>=3	SBP	GO:0044260	P	cellular macromolecule metabolic process	708	1632	9350	24075	0.00016	0.04	LOC_Os08g24410	retrotransposon protein, putative, unclassified, expressed
D or OD	>=3	SBP	GO:0044260	P	cellular macromolecule metabolic process	708	1632	9350	24075	0.00016	0.04	LOC_Os06g39180	retrotransposon protein, putative, unclassified, expressed
D or OD	>=3	SBP	GO:0044260	P	cellular macromolecule metabolic process	708	1632	9350	24075	0.00016	0.04	LOC_Os07g23800	ribosomal protein S5, C-terminal domain containing protein, expressed
D or OD	>=3	SBP	GO:0044260	P	cellular macromolecule metabolic process	708	1632	9350	24075	0.00016	0.04	LOC_Os12g32230	molybdenum cofactor biosynthesis protein 1, putative, expressed
D or OD	>=3	SBP	GO:0044260	P	cellular macromolecule metabolic process	708	1632	9350	24075	0.00016	0.04	LOC_Os03g15620	retrotransposon protein, putative, unclassified, expressed
D or OD	>=3	SBP	GO:0044260	P	cellular macromolecule metabolic process	708	1632	9350	24075	0.00016	0.04	LOC_Os06g41510	D-mannose binding lectin family protein, expressed
D or OD	>=3	SBP	GO:0044260	P	cellular macromolecule metabolic process	708	1632	9350	24075	0.00016	0.04	LOC_Os04g05330	retrotransposon protein, putative, unclassified, expressed
D or OD	>=3	SBP	GO:0044260	P	cellular macromolecule metabolic process	708	1632	9350	24075	0.00016	0.04	LOC_Os01g59360	CAMK_CAMK_like.10 - CAMK includes calcium/calmodulin depedent protein kinases, expressed
D or OD	>=3	SBP	GO:0044260	P	cellular macromolecule metabolic process	708	1632	9350	24075	0.00016	0.04	LOC_Os02g44510	UDP-glucose glycoprotein glucosyltransferase 1 precursor, putative, expressed
D or OD	>=3	SBP	GO:0044260	P	cellular macromolecule metabolic process	708	1632	9350	24075	0.00016	0.04	LOC_Os01g02420	protein kinase domain containing protein, expressed
D or OD	>=3	SBP	GO:0044260	P	cellular macromolecule metabolic process	708	1632	9350	24075	0.00016	0.04	LOC_Os04g04914	retrotransposon protein, putative, unclassified, expressed
D or OD	>=3	SBP	GO:0044260	P	cellular macromolecule metabolic process	708	1632	9350	24075	0.00016	0.04	LOC_Os01g02390	protein kinase domain containing protein, expressed
D or OD	>=3	SBP	GO:0044260	P	cellular macromolecule metabolic process	708	1632	9350	24075	0.00016	0.04	LOC_Os04g29424	retrotransposon protein, putative, LINE subclass, expressed
D or OD	>=3	SBP	GO:0044260	P	cellular macromolecule metabolic process	708	1632	9350	24075	0.00016	0.04	LOC_Os06g43090	MYB transcription factor TaMYB1, putative, expressed
D or OD	>=3	SBP	GO:0044260	P	cellular macromolecule metabolic process	708	1632	9350	24075	0.00016	0.04	LOC_Os01g23550	retrotransposon protein, putative, unclassified, expressed
D or OD	>=3	SBP	GO:0044260	P	cellular macromolecule metabolic process	708	1632	9350	24075	0.00016	0.04	LOC_Os06g40270	retrotransposon protein, putative, unclassified
D or OD	>=3	SBP	GO:0044260	P	cellular macromolecule metabolic process	708	1632	9350	24075	0.00016	0.04	LOC_Os12g15870	retrotransposon protein, putative, unclassified, expressed
D or OD	>=3	SBP	GO:0044260	P	cellular macromolecule metabolic process	708	1632	9350	24075	0.00016	0.04	LOC_Os07g38810	lectin receptor-type protein kinase, putative, expressed
D or OD	>=3	SBP	GO:0044260	P	cellular macromolecule metabolic process	708	1632	9350	24075	0.00016	0.04	LOC_Os12g33954	ribosomal protein S2, putative, expressed
D or OD	>=3	SBP	GO:0044260	P	cellular macromolecule metabolic process	708	1632	9350	24075	0.00016	0.04	LOC_Os12g33956	maturase, putative, expressed
D or OD	>=3	SBP	GO:0044260	P	cellular macromolecule metabolic process	708	1632	9350	24075	0.00016	0.04	LOC_Os07g23460	retrotransposon protein, putative, Ty1-copia subclass, expressed
D or OD	>=3	SBP	GO:0044260	P	cellular macromolecule metabolic process	708	1632	9350	24075	0.00016	0.04	LOC_Os04g29350	retrotransposon protein, putative, unclassified, expressed
D or OD	>=3	SBP	GO:0044260	P	cellular macromolecule metabolic process	708	1632	9350	24075	0.00016	0.04	LOC_Os03g26570	retrotransposon protein, putative, unclassified, expressed
D or OD	>=3	SBP	GO:0044260	P	cellular macromolecule metabolic process	708	1632	9350	24075	0.00016	0.04	LOC_Os07g25090	retrotransposon protein, putative, Ty3-gypsy subclass, expressed
D or OD	>=3	SBP	GO:0044260	P	cellular macromolecule metabolic process	708	1632	9350	24075	0.00016	0.04	LOC_Os03g39250	retrotransposon protein, putative, Ty3-gypsy subclass, expressed
D or OD	>=3	SBP	GO:0044260	P	cellular macromolecule metabolic process	708	1632	9350	24075	0.00016	0.04	LOC_Os02g45200	dof zinc finger domain containing protein, putative, expressed
D or OD	>=3	SBP	GO:0044260	P	cellular macromolecule metabolic process	708	1632	9350	24075	0.00016	0.04	LOC_Os07g25150	myb-related protein 306, putative, expressed
D or OD	>=3	SBP	GO:0044260	P	cellular macromolecule metabolic process	708	1632	9350	24075	0.00016	0.04	LOC_Os09g35010	dehydration-responsive element-binding protein, putative, expressed
D or OD	>=3	SBP	GO:0044260	P	cellular macromolecule metabolic process	708	1632	9350	24075	0.00016	0.04	LOC_Os01g10720	retrotransposon protein, putative, unclassified, expressed
D or OD	>=3	SBP	GO:0044260	P	cellular macromolecule metabolic process	708	1632	9350	24075	0.00016	0.04	LOC_Os03g02350	transposon protein, putative, unclassified, expressed
D or OD	>=3	SBP	GO:0044260	P	cellular macromolecule metabolic process	708	1632	9350	24075	0.00016	0.04	LOC_Os10g34640	retrotransposon protein, putative, unclassified
D or OD	>=3	SBP	GO:0044260	P	cellular macromolecule metabolic process	708	1632	9350	24075	0.00016	0.04	LOC_Os12g15570	retrotransposon protein, putative, unclassified, expressed
D or OD	>=3	SBP	GO:0044260	P	cellular macromolecule metabolic process	708	1632	9350	24075	0.00016	0.04	LOC_Os04g06120	retrotransposon protein, putative, Ty3-gypsy subclass, expressed
D or OD	>=3	SBP	GO:0044260	P	cellular macromolecule metabolic process	708	1632	9350	24075	0.00016	0.04	LOC_Os04g05670	retrotransposon protein, putative, Ty3-gypsy subclass, expressed
D or OD	>=3	SBP	GO:0044260	P	cellular macromolecule metabolic process	708	1632	9350	24075	0.00016	0.04	LOC_Os01g60490	WRKY22, expressed
D or OD	>=3	SBP	GO:0044260	P	cellular macromolecule metabolic process	708	1632	9350	24075	0.00016	0.04	LOC_Os12g32800	retrotransposon protein, putative, Ty3-gypsy subclass, expressed
D or OD	>=3	SBP	GO:0044260	P	cellular macromolecule metabolic process	708	1632	9350	24075	0.00016	0.04	LOC_Os12g34128	mitochondrial 60S ribosomal protein L16, putative, expressed
D or OD	>=3	SBP	GO:0044260	P	cellular macromolecule metabolic process	708	1632	9350	24075	0.00016	0.04	LOC_Os12g34045	mitochondrial ribosomal protein S7, putative, expressed
D or OD	>=3	SBP	GO:0044260	P	cellular macromolecule metabolic process	708	1632	9350	24075	0.00016	0.04	LOC_Os04g25540	ribosomal protein L27, putative, expressed
D or OD	>=3	SBP	GO:0044260	P	cellular macromolecule metabolic process	708	1632	9350	24075	0.00016	0.04	LOC_Os12g34124	mitochondrial ribosomal protein S3, putative, expressed
D or OD	>=3	SBP	GO:0044260	P	cellular macromolecule metabolic process	708	1632	9350	24075	0.00016	0.04	LOC_Os07g38250	expressed protein
D or OD	>=3	SBP	GO:0044260	P	cellular macromolecule metabolic process	708	1632	9350	24075	0.00016	0.04	LOC_Os08g25090	co-chaperone GrpE protein, putative, expressed
D or OD	>=3	SBP	GO:0044260	P	cellular macromolecule metabolic process	708	1632	9350	24075	0.00016	0.04	LOC_Os08g29420	retrotransposon protein, putative, Ty3-gypsy subclass, expressed
D or OD	>=3	SBP	GO:0044260	P	cellular macromolecule metabolic process	708	1632	9350	24075	0.00016	0.04	LOC_Os11g18420	retrotransposon protein, putative, Ty3-gypsy subclass
D or OD	>=3	SBP	GO:0044260	P	cellular macromolecule metabolic process	708	1632	9350	24075	0.00016	0.04	LOC_Os03g02970	Dicer, putative, expressed
D or OD	>=3	SBP	GO:0044260	P	cellular macromolecule metabolic process	708	1632	9350	24075	0.00016	0.04	LOC_Os06g39718	chloroplast 50S ribosomal protein L33, putative, expressed
D or OD	>=3	SBP	GO:0044260	P	cellular macromolecule metabolic process	708	1632	9350	24075	0.00016	0.04	LOC_Os03g15370	ubiquitin fusion protein, putative, expressed
D or OD	>=3	SBP	GO:0044260	P	cellular macromolecule metabolic process	708	1632	9350	24075	0.00016	0.04	LOC_Os06g39716	chloroplast 30S ribosomal protein S18, putative, expressed
D or OD	>=3	SBP	GO:0044260	P	cellular macromolecule metabolic process	708	1632	9350	24075	0.00016	0.04	LOC_Os10g11990	retrotransposon protein, putative, Ty1-copia subclass, expressed
D or OD	>=3	SBP	GO:0044260	P	cellular macromolecule metabolic process	708	1632	9350	24075	0.00016	0.04	LOC_Os12g15590	heat shock protein DnaJ, putative, expressed
D or OD	>=3	SBP	GO:0044260	P	cellular macromolecule metabolic process	708	1632	9350	24075	0.00016	0.04	LOC_Os07g22550	retrotransposon protein, putative, Ty3-gypsy subclass, expressed
D or OD	>=3	SBP	GO:0044260	P	cellular macromolecule metabolic process	708	1632	9350	24075	0.00016	0.04	LOC_Os01g58710	retrotransposon protein, putative, Ty3-gypsy subclass, expressed
D or OD	>=3	SBP	GO:0044260	P	cellular macromolecule metabolic process	708	1632	9350	24075	0.00016	0.04	LOC_Os01g10810	rho termination factor, N-terminal domain containing protein, expressed
D or OD	>=3	SBP	GO:0044260	P	cellular macromolecule metabolic process	708	1632	9350	24075	0.00016	0.04	LOC_Os09g34330	helix-loop-helix DNA-binding domain containing protein, expressed
D or OD	>=3	SBP	GO:0044260	P	cellular macromolecule metabolic process	708	1632	9350	24075	0.00016	0.04	LOC_Os03g03070	transcription factor, putative, expressed
D or OD	>=3	SBP	GO:0044260	P	cellular macromolecule metabolic process	708	1632	9350	24075	0.00016	0.04	LOC_Os06g49430	CGMC_MAPKCMGC_2.11 - CGMC includes CDA, MAPK, GSK3, and CLKC kinases, expressed
D or OD	>=3	SBP	GO:0044260	P	cellular macromolecule metabolic process	708	1632	9350	24075	0.00016	0.04	LOC_Os06g50030	CAMK_CAMK_like.30 - CAMK includes calcium/calmodulin depedent protein kinases, expressed
D or OD	>=3	SBP	GO:0044260	P	cellular macromolecule metabolic process	708	1632	9350	24075	0.00016	0.04	LOC_Os03g33140	retrotransposon protein, putative, Ty3-gypsy subclass, expressed
D or OD	>=3	SBP	GO:0044260	P	cellular macromolecule metabolic process	708	1632	9350	24075	0.00016	0.04	LOC_Os01g59140	DNA-directed RNA polymerases I, II, and III subunit RPABC1, putative, expressed
D or OD	>=3	SBP	GO:0044260	P	cellular macromolecule metabolic process	708	1632	9350	24075	0.00016	0.04	LOC_Os03g28140	1-phosphatidylinositol-4-phosphate 5-kinase/ zinc ion binding protein, putative, expressed
D or OD	>=3	SBP	GO:0044260	P	cellular macromolecule metabolic process	708	1632	9350	24075	0.00016	0.04	LOC_Os11g24930	retrotransposon protein, putative, Ty3-gypsy subclass, expressed
D or OD	>=3	SBP	GO:0044260	P	cellular macromolecule metabolic process	708	1632	9350	24075	0.00016	0.04	LOC_Os07g25022	conserved hypothetical protein
D or OD	>=3	SBP	GO:0044260	P	cellular macromolecule metabolic process	708	1632	9350	24075	0.00016	0.04	LOC_Os07g25024	chloroplast 30S ribosomal protein S19, putative
D or OD	>=3	SBP	GO:0044260	P	cellular macromolecule metabolic process	708	1632	9350	24075	0.00016	0.04	LOC_Os03g26970	peptidase, T1 family, putative, expressed
D or OD	>=3	SBP	GO:0044260	P	cellular macromolecule metabolic process	708	1632	9350	24075	0.00016	0.04	LOC_Os12g34154	ribosomal protein S2, putative, expressed
D or OD	>=3	SBP	GO:0044260	P	cellular macromolecule metabolic process	708	1632	9350	24075	0.00016	0.04	LOC_Os08g26920	retrotransposon protein, putative, Ty3-gypsy subclass, expressed
D or OD	>=3	SBP	GO:0044260	P	cellular macromolecule metabolic process	708	1632	9350	24075	0.00016	0.04	LOC_Os01g10820	ribosomal protein L5, putative, expressed
D or OD	>=3	SBP	GO:0044260	P	cellular macromolecule metabolic process	708	1632	9350	24075	0.00016	0.04	LOC_Os06g49140	ribosomal RNA large subunit methyltransferase J, putative, expressed
D or OD	>=3	SBP	GO:0044260	P	cellular macromolecule metabolic process	708	1632	9350	24075	0.00016	0.04	LOC_Os01g42590	retrotransposon protein, putative, unclassified, expressed
D or OD	>=3	SBP	GO:0044260	P	cellular macromolecule metabolic process	708	1632	9350	24075	0.00016	0.04	LOC_Os02g44642	STE_MEKK_ste11_MAP3K.10 - STE kinases include homologs to sterile 7, sterile 11 and sterile 20 from yeast, expressed
D or OD	>=3	SBP	GO:0044260	P	cellular macromolecule metabolic process	708	1632	9350	24075	0.00016	0.04	LOC_Os01g12410	receptor-like protein kinase, putative, expressed
D or OD	>=3	SBP	GO:0044260	P	cellular macromolecule metabolic process	708	1632	9350	24075	0.00016	0.04	LOC_Os11g18250	retrotransposon protein, putative, Ty3-gypsy subclass
D or OD	>=3	SBP	GO:0044260	P	cellular macromolecule metabolic process	708	1632	9350	24075	0.00016	0.04	LOC_Os08g09160	retrotransposon protein, putative, unclassified, expressed
D or OD	>=3	SBP	GO:0044260	P	cellular macromolecule metabolic process	708	1632	9350	24075	0.00016	0.04	LOC_Os03g33240	retrotransposon protein, putative, unclassified, expressed
D or OD	>=3	SBP	GO:0044260	P	cellular macromolecule metabolic process	708	1632	9350	24075	0.00016	0.04	LOC_Os02g43760	ubiquitin carboxyl-terminal hydrolase, family 1, putative, expressed
D or OD	>=3	SBP	GO:0044260	P	cellular macromolecule metabolic process	708	1632	9350	24075	0.00016	0.04	LOC_Os12g32380	40S ribosomal protein S29, putative, expressed
D or OD	>=3	SBP	GO:0044260	P	cellular macromolecule metabolic process	708	1632	9350	24075	0.00016	0.04	LOC_Os06g49910	retrotransposon protein, putative, unclassified
D or OD	>=3	SBP	GO:0044260	P	cellular macromolecule metabolic process	708	1632	9350	24075	0.00016	0.04	LOC_Os10g12010	retrotransposon protein, putative, unclassified, expressed
D or OD	>=3	SBP	GO:0044260	P	cellular macromolecule metabolic process	708	1632	9350	24075	0.00016	0.04	LOC_Os05g24850	retrotransposon protein, putative, Ty3-gypsy subclass
D or OD	>=3	SBP	GO:0044260	P	cellular macromolecule metabolic process	708	1632	9350	24075	0.00016	0.04	LOC_Os07g38070	protein kinase, putative, expressed
D or OD	>=3	SBP	GO:0044260	P	cellular macromolecule metabolic process	708	1632	9350	24075	0.00016	0.04	LOC_Os07g33110	CAMK_CAMK_like.33 - CAMK includes calcium/calmodulin depedent protein kinases, expressed
D or OD	>=3	SBP	GO:0044260	P	cellular macromolecule metabolic process	708	1632	9350	24075	0.00016	0.04	LOC_Os10g11690	retrotransposon protein, putative, Ty3-gypsy subclass, expressed
D or OD	>=3	SBP	GO:0044260	P	cellular macromolecule metabolic process	708	1632	9350	24075	0.00016	0.04	LOC_Os07g23070	retrotransposon protein, putative, Ty3-gypsy subclass, expressed
D or OD	>=3	SBP	GO:0044260	P	cellular macromolecule metabolic process	708	1632	9350	24075	0.00016	0.04	LOC_Os01g23040	retrotransposon protein, putative, Ty3-gypsy subclass, expressed
D or OD	>=3	SBP	GO:0044260	P	cellular macromolecule metabolic process	708	1632	9350	24075	0.00016	0.04	LOC_Os04g05560	kinase, putative, expressed
D or OD	>=3	SBP	GO:0044260	P	cellular macromolecule metabolic process	708	1632	9350	24075	0.00016	0.04	LOC_Os03g26020	retrotransposon protein, putative, unclassified, expressed
D or OD	>=3	SBP	GO:0044260	P	cellular macromolecule metabolic process	708	1632	9350	24075	0.00016	0.04	LOC_Os04g04720	retrotransposon protein, putative, unclassified, expressed
D or OD	>=3	SBP	GO:0044260	P	cellular macromolecule metabolic process	708	1632	9350	24075	0.00016	0.04	LOC_Os08g24770	protein kinase, putative, expressed
D or OD	>=3	SBP	GO:0044260	P	cellular macromolecule metabolic process	708	1632	9350	24075	0.00016	0.04	LOC_Os03g28310	dnaJ domain containing protein, expressed
D or OD	>=3	SBP	GO:0044260	P	cellular macromolecule metabolic process	708	1632	9350	24075	0.00016	0.04	LOC_Os03g03000	helix-loop-helix DNA-binding domain containing protein, expressed
D or OD	>=3	SBP	GO:0044260	P	cellular macromolecule metabolic process	708	1632	9350	24075	0.00016	0.04	LOC_Os08g24040	retrotransposon protein, putative, unclassified, expressed
D or OD	>=3	SBP	GO:0044260	P	cellular macromolecule metabolic process	708	1632	9350	24075	0.00016	0.04	LOC_Os06g37720	retrotransposon protein, putative, Ty3-gypsy subclass, expressed
D or OD	>=3	SBP	GO:0044260	P	cellular macromolecule metabolic process	708	1632	9350	24075	0.00016	0.04	LOC_Os07g32950	dnaJ C terminal region family protein, expressed
D or OD	>=3	SBP	GO:0044260	P	cellular macromolecule metabolic process	708	1632	9350	24075	0.00016	0.04	LOC_Os02g44920	protein kinase domain containing protein, expressed
D or OD	>=3	SBP	GO:0044260	P	cellular macromolecule metabolic process	708	1632	9350	24075	0.00016	0.04	LOC_Os12g33000	retrotransposon protein, putative, unclassified, expressed
D or OD	>=3	SBP	GO:0044260	P	cellular macromolecule metabolic process	708	1632	9350	24075	0.00016	0.04	LOC_Os02g45010	ethylene-responsive protein related, putative, expressed
D or OD	>=3	SBP	GO:0044260	P	cellular macromolecule metabolic process	708	1632	9350	24075	0.00016	0.04	LOC_Os01g60060	leucine-rich repeat family protein, putative, expressed
D or OD	>=3	SBP	GO:0044260	P	cellular macromolecule metabolic process	708	1632	9350	24075	0.00016	0.04	LOC_Os03g03410	serine/threonine-protein kinase, putative, expressed
D or OD	>=3	SBP	GO:0044260	P	cellular macromolecule metabolic process	708	1632	9350	24075	0.00016	0.04	LOC_Os08g09260	tRNA synthetase, putative, expressed
D or OD	>=3	SBP	GO:0044260	P	cellular macromolecule metabolic process	708	1632	9350	24075	0.00016	0.04	LOC_Os03g02800	no apical meristem protein, putative, expressed
D or OD	>=3	SBP	GO:0044260	P	cellular macromolecule metabolic process	708	1632	9350	24075	0.00016	0.04	LOC_Os07g25440	WD domain, G-beta repeat domain containing protein, expressed
D or OD	>=3	SBP	GO:0044260	P	cellular macromolecule metabolic process	708	1632	9350	24075	0.00016	0.04	LOC_Os09g19350	expressed protein
D or OD	>=3	SBP	GO:0044260	P	cellular macromolecule metabolic process	708	1632	9350	24075	0.00016	0.04	LOC_Os01g59350	transcription factor, putative, expressed
D or OD	>=3	SBP	GO:0044260	P	cellular macromolecule metabolic process	708	1632	9350	24075	0.00016	0.04	LOC_Os01g12090	ribosomal protein S6 family protein, putative, expressed
D or OD	>=3	SBP	GO:0044260	P	cellular macromolecule metabolic process	708	1632	9350	24075	0.00016	0.04	LOC_Os01g68324	dolichyl-diphosphooligosaccharide--protein glycosyltransferase 63 kDasubunit precursor, putative, expressed
D or OD	>=3	SBP	GO:0044260	P	cellular macromolecule metabolic process	708	1632	9350	24075	0.00016	0.04	LOC_Os07g24740	retrotransposon protein, putative, Ty3-gypsy subclass, expressed
D or OD	>=3	SBP	GO:0044260	P	cellular macromolecule metabolic process	708	1632	9350	24075	0.00016	0.04	LOC_Os01g60330	inactive receptor kinase At2g26730 precursor, putative, expressed
D or OD	>=3	SBP	GO:0044260	P	cellular macromolecule metabolic process	708	1632	9350	24075	0.00016	0.04	LOC_Os12g33370	retrotransposon protein, putative, Ty3-gypsy subclass
D or OD	>=3	SBP	GO:0044260	P	cellular macromolecule metabolic process	708	1632	9350	24075	0.00016	0.04	LOC_Os01g02460	receptor kinase LRK10, putative, expressed
D or OD	>=3	SBP	GO:0044260	P	cellular macromolecule metabolic process	708	1632	9350	24075	0.00016	0.04	LOC_Os01g59560	protein kinase domain containing protein, expressed
D or OD	>=3	SBP	GO:0044260	P	cellular macromolecule metabolic process	708	1632	9350	24075	0.00016	0.04	LOC_Os08g24270	retrotransposon protein, putative, Ty3-gypsy subclass, expressed
D or OD	>=3	SBP	GO:0044260	P	cellular macromolecule metabolic process	708	1632	9350	24075	0.00016	0.04	LOC_Os09g18594	protein kinase domain containing protein, expressed
D or OD	>=3	SBP	GO:0044260	P	cellular macromolecule metabolic process	708	1632	9350	24075	0.00016	0.04	LOC_Os03g33328	retrotransposon protein, putative, Ty3-gypsy subclass, expressed
D or OD	>=3	SBP	GO:0044260	P	cellular macromolecule metabolic process	708	1632	9350	24075	0.00016	0.04	LOC_Os04g05290	retrotransposon protein, putative, Ty3-gypsy subclass, expressed
D or OD	>=3	SBP	GO:0044260	P	cellular macromolecule metabolic process	708	1632	9350	24075	0.00016	0.04	LOC_Os09g06800	retrotransposon protein, putative, Ty3-gypsy subclass, expressed
D or OD	>=3	SBP	GO:0044260	P	cellular macromolecule metabolic process	708	1632	9350	24075	0.00016	0.04	LOC_Os04g04790	expressed protein
D or OD	>=3	SBP	GO:0044260	P	cellular macromolecule metabolic process	708	1632	9350	24075	0.00016	0.04	LOC_Os06g42770	type II intron maturase protein, putative, expressed
D or OD	>=3	SBP	GO:0044260	P	cellular macromolecule metabolic process	708	1632	9350	24075	0.00016	0.04	LOC_Os06g41560	receptor-like protein kinase, putative, expressed
D or OD	>=3	SBP	GO:0044260	P	cellular macromolecule metabolic process	708	1632	9350	24075	0.00016	0.04	LOC_Os01g59760	bZIP transcription factor, putative, expressed
D or OD	>=3	SBP	GO:0044260	P	cellular macromolecule metabolic process	708	1632	9350	24075	0.00016	0.04	LOC_Os07g17440	retrotransposon protein, putative, Ty1-copia subclass, expressed
D or OD	>=3	SBP	GO:0044260	P	cellular macromolecule metabolic process	708	1632	9350	24075	0.00016	0.04	LOC_Os12g16060	retrotransposon protein, putative, Ty1-copia subclass, expressed
D or OD	>=3	SBP	GO:0044260	P	cellular macromolecule metabolic process	708	1632	9350	24075	0.00016	0.04	LOC_Os02g44190	retrotransposon protein, putative, Ty3-gypsy subclass
D or OD	>=3	SBP	GO:0044260	P	cellular macromolecule metabolic process	708	1632	9350	24075	0.00016	0.04	LOC_Os03g39350	retrotransposon protein, putative, Ty3-gypsy subclass, expressed
D or OD	>=3	SBP	GO:0044260	P	cellular macromolecule metabolic process	708	1632	9350	24075	0.00016	0.04	LOC_Os06g39820	retrotransposon protein, putative, unclassified, expressed
D or OD	>=3	SBP	GO:0044260	P	cellular macromolecule metabolic process	708	1632	9350	24075	0.00016	0.04	LOC_Os03g35390	retrotransposon protein, putative, unclassified, expressed
D or OD	>=3	SBP	GO:0044260	P	cellular macromolecule metabolic process	708	1632	9350	24075	0.00016	0.04	LOC_Os04g29520	retrotransposon protein, putative, unclassified, expressed
D or OD	>=3	SBP	GO:0044260	P	cellular macromolecule metabolic process	708	1632	9350	24075	0.00016	0.04	LOC_Os07g25190	retrotransposon protein, putative, Ty3-gypsy subclass, expressed
D or OD	>=3	SBP	GO:0044260	P	cellular macromolecule metabolic process	708	1632	9350	24075	0.00016	0.04	LOC_Os02g45120	expressed protein
D or OD	>=3	SBP	GO:0044260	P	cellular macromolecule metabolic process	708	1632	9350	24075	0.00016	0.04	LOC_Os09g33930	farnesyltransferase/geranylgeranyltransferase type-1 subunitalpha, putative, expressed
D or OD	>=3	SBP	GO:0044260	P	cellular macromolecule metabolic process	708	1632	9350	24075	0.00016	0.04	LOC_Os03g39560	retrotransposon protein, putative, unclassified, expressed
D or OD	>=3	SBP	GO:0044260	P	cellular macromolecule metabolic process	708	1632	9350	24075	0.00016	0.04	LOC_Os04g04590	retrotransposon protein, putative, Ty3-gypsy subclass, expressed
D or OD	>=3	SBP	GO:0044260	P	cellular macromolecule metabolic process	708	1632	9350	24075	0.00016	0.04	LOC_Os01g58920	retrotransposon protein, putative, Ty3-gypsy subclass, expressed
D or OD	>=3	SBP	GO:0044260	P	cellular macromolecule metabolic process	708	1632	9350	24075	0.00016	0.04	LOC_Os07g25370	myb-like DNA-binding domain containing protein, expressed
D or OD	>=3	SBP	GO:0044260	P	cellular macromolecule metabolic process	708	1632	9350	24075	0.00016	0.04	LOC_Os07g25210	retrotransposon protein, putative, Ty3-gypsy subclass, expressed
D or OD	>=3	SBP	GO:0044260	P	cellular macromolecule metabolic process	708	1632	9350	24075	0.00016	0.04	LOC_Os06g42690	bZIP transcription factor domain containing protein, expressed
D or OD	>=3	SBP	GO:0044260	P	cellular macromolecule metabolic process	708	1632	9350	24075	0.00016	0.04	LOC_Os06g43290	retrotransposon protein, putative, Ty1-copia subclass, expressed
D or OD	>=3	SBP	GO:0044260	P	cellular macromolecule metabolic process	708	1632	9350	24075	0.00016	0.04	LOC_Os03g39400	retrotransposon protein, putative, Ty1-copia subclass, expressed
D or OD	>=3	SBP	GO:0044260	P	cellular macromolecule metabolic process	708	1632	9350	24075	0.00016	0.04	LOC_Os08g25290	expressed protein
D or OD	>=3	SBP	GO:0044260	P	cellular macromolecule metabolic process	708	1632	9350	24075	0.00016	0.04	LOC_Os06g50920	protein kinase family protein, putative, expressed
D or OD	>=3	SBP	GO:0044260	P	cellular macromolecule metabolic process	708	1632	9350	24075	0.00016	0.04	LOC_Os07g24340	retrotransposon protein, putative, Ty1-copia subclass, expressed
D or OD	>=3	SBP	GO:0044260	P	cellular macromolecule metabolic process	708	1632	9350	24075	0.00016	0.04	LOC_Os04g06244	kinase, putative, expressed
D or OD	>=3	SBP	GO:0044260	P	cellular macromolecule metabolic process	708	1632	9350	24075	0.00016	0.04	LOC_Os08g25110	transposon protein, putative, unclassified, expressed
D or OD	>=3	SBP	GO:0044260	P	cellular macromolecule metabolic process	708	1632	9350	24075	0.00016	0.04	LOC_Os01g60020	NAC domain transcription factor, putative, expressed
D or OD	>=3	SBP	GO:0044260	P	cellular macromolecule metabolic process	708	1632	9350	24075	0.00016	0.04	LOC_Os06g39540	retrotransposon protein, putative, unclassified, expressed
D or OD	>=3	SBP	GO:0044260	P	cellular macromolecule metabolic process	708	1632	9350	24075	0.00016	0.04	LOC_Os06g06940	S-locus-like receptor protein kinase, putative, expressed
D or OD	>=3	SBP	GO:0044260	P	cellular macromolecule metabolic process	708	1632	9350	24075	0.00016	0.04	LOC_Os01g11900	hhH-GPD superfamily base excision DNA repair protein, expressed
D or OD	>=3	SBP	GO:0044260	P	cellular macromolecule metabolic process	708	1632	9350	24075	0.00016	0.04	LOC_Os07g38350	retrotransposon protein, putative, Ty1-copia subclass, expressed
D or OD	>=3	SBP	GO:0044260	P	cellular macromolecule metabolic process	708	1632	9350	24075	0.00016	0.04	LOC_Os07g17620	retrotransposon protein, putative, Ty3-gypsy subclass, expressed
D or OD	>=3	SBP	GO:0044260	P	cellular macromolecule metabolic process	708	1632	9350	24075	0.00016	0.04	LOC_Os04g04940	retrotransposon protein, putative, unclassified, expressed
D or OD	>=3	SBP	GO:0044260	P	cellular macromolecule metabolic process	708	1632	9350	24075	0.00016	0.04	LOC_Os01g60410	ubiquitin-conjugating enzyme, putative, expressed
D or OD	>=3	SBP	GO:0044260	P	cellular macromolecule metabolic process	708	1632	9350	24075	0.00016	0.04	LOC_Os02g44610	protein kinase, putative, expressed
D or OD	>=3	SBP	GO:0044260	P	cellular macromolecule metabolic process	708	1632	9350	24075	0.00016	0.04	LOC_Os01g10504	OsMADS3 - MADS-box family gene with MIKCc type-box, expressed
D or OD	>=3	SBP	GO:0044260	P	cellular macromolecule metabolic process	708	1632	9350	24075	0.00016	0.04	LOC_Os06g49840	OsMADS16 - MADS-box family gene with MIKCc type-box, expressed
D or OD	>=3	SBP	GO:0044260	P	cellular macromolecule metabolic process	708	1632	9350	24075	0.00016	0.04	LOC_Os01g42400	STE_MEK_ste7_MAP2K.3 - STE kinases include homologs to sterile 7, sterile 11 and sterile 20 from yeast, expressed
D or OD	>=3	SBP	GO:0044260	P	cellular macromolecule metabolic process	708	1632	9350	24075	0.00016	0.04	LOC_Os07g38820	lectin-like receptor kinase, putative, expressed
D or OD	>=3	SBP	GO:0044260	P	cellular macromolecule metabolic process	708	1632	9350	24075	0.00016	0.04	LOC_Os01g59660	MYB family transcription factor, putative, expressed
D or OD	>=3	SBP	GO:0044260	P	cellular macromolecule metabolic process	708	1632	9350	24075	0.00016	0.04	LOC_Os12g31570	retrotransposon protein, putative, Ty3-gypsy subclass
D or OD	>=3	SBP	GO:0044260	P	cellular macromolecule metabolic process	708	1632	9350	24075	0.00016	0.04	LOC_Os01g11350	bZIP transcription factor domain containing protein, expressed
D or OD	>=3	SBP	GO:0044260	P	cellular macromolecule metabolic process	708	1632	9350	24075	0.00016	0.04	LOC_Os09g13540	retrotransposon protein, putative, unclassified, expressed
D or OD	>=3	SBP	GO:0044260	P	cellular macromolecule metabolic process	708	1632	9350	24075	0.00016	0.04	LOC_Os06g38930	leucine-rich repeat receptor protein kinase EXS precursor, putative, expressed
D or OD	>=3	SBP	GO:0044260	P	cellular macromolecule metabolic process	708	1632	9350	24075	0.00016	0.04	LOC_Os08g29490	retrotransposon protein, putative, unclassified, expressed
D or OD	>=3	SBP	GO:0044260	P	cellular macromolecule metabolic process	708	1632	9350	24075	0.00016	0.04	LOC_Os01g59060	50S ribosomal protein, putative, expressed
D or OD	>=3	SBP	GO:0044260	P	cellular macromolecule metabolic process	708	1632	9350	24075	0.00016	0.04	LOC_Os04g05220	retrotransposon protein, putative, Ty3-gypsy subclass
D or OD	>=3	SBP	GO:0044260	P	cellular macromolecule metabolic process	708	1632	9350	24075	0.00016	0.04	LOC_Os07g24910	retrotransposon protein, putative, Ty3-gypsy subclass, expressed
D or OD	>=3	SBP	GO:0044260	P	cellular macromolecule metabolic process	708	1632	9350	24075	0.00016	0.04	LOC_Os08g25200	paired amphipathic helix repeat-containing protein, putative, expressed
D or OD	>=3	SBP	GO:0044260	P	cellular macromolecule metabolic process	708	1632	9350	24075	0.00016	0.04	LOC_Os12g15780	retrotransposon protein, putative, unclassified, expressed
D or OD	>=3	SBP	GO:0044260	P	cellular macromolecule metabolic process	708	1632	9350	24075	0.00016	0.04	LOC_Os01g58810	retrotransposon protein, putative, Ty1-copia subclass, expressed
D or OD	>=3	SBP	GO:0044260	P	cellular macromolecule metabolic process	708	1632	9350	24075	0.00016	0.04	LOC_Os07g23400	retrotransposon protein, putative, Ty1-copia subclass, expressed
D or OD	>=3	SBP	GO:0044260	P	cellular macromolecule metabolic process	708	1632	9350	24075	0.00016	0.04	LOC_Os08g09320	YL1 nuclear protein C-terminal domain containing protein, expressed
D or OD	>=3	SBP	GO:0044260	P	cellular macromolecule metabolic process	708	1632	9350	24075	0.00016	0.04	LOC_Os03g02980	CAMK_CAMK_like_ULKh_APGy.1 - CAMK includes calcium/calmodulin depedent protein kinases, expressed
D or OD	>=3	SBP	GO:0044260	P	cellular macromolecule metabolic process	708	1632	9350	24075	0.00016	0.04	LOC_Os06g39590	OsIAA23 - Auxin-responsive Aux/IAA gene family member, expressed
D or OD	>=3	SBP	GO:0044260	P	cellular macromolecule metabolic process	708	1632	9350	24075	0.00016	0.04	LOC_Os03g27260	40S ribosomal protein S6, putative, expressed
D or OD	>=3	SBP	GO:0044260	P	cellular macromolecule metabolic process	708	1632	9350	24075	0.00016	0.04	LOC_Os07g33010	retrotransposon protein, putative, unclassified, expressed
D or OD	>=3	SBP	GO:0044260	P	cellular macromolecule metabolic process	708	1632	9350	24075	0.00016	0.04	LOC_Os01g60480	retrotransposon protein, putative, unclassified, expressed
D or OD	>=3	SBP	GO:0044260	P	cellular macromolecule metabolic process	708	1632	9350	24075	0.00016	0.04	LOC_Os12g33450	retrotransposon protein, putative, Ty3-gypsy subclass, expressed
D or OD	>=3	SBP	GO:0044260	P	cellular macromolecule metabolic process	708	1632	9350	24075	0.00016	0.04	LOC_Os12g33320	retrotransposon protein, putative, unclassified, expressed
D or OD	>=3	SBP	GO:0044260	P	cellular macromolecule metabolic process	708	1632	9350	24075	0.00016	0.04	LOC_Os01g58740	glycerol-3-phosphate dehydrogenase, putative, expressed
D or OD	>=3	SBP	GO:0044260	P	cellular macromolecule metabolic process	708	1632	9350	24075	0.00016	0.04	LOC_Os08g09230	starch synthase III, putative, expressed
D or OD	>=3	SBP	GO:0044260	P	cellular macromolecule metabolic process	708	1632	9350	24075	0.00016	0.04	LOC_Os11g18580	retrotransposon protein, putative, Ty1-copia subclass, expressed
D or OD	>=3	SBP	GO:0044260	P	cellular macromolecule metabolic process	708	1632	9350	24075	0.00016	0.04	LOC_Os12g33690	retrotransposon protein, putative, Ty3-gypsy subclass, expressed
D or OD	>=3	SBP	GO:0044260	P	cellular macromolecule metabolic process	708	1632	9350	24075	0.00016	0.04	LOC_Os06g49350	retrotransposon protein, putative, unclassified, expressed
D or OD	>=3	SBP	GO:0044260	P	cellular macromolecule metabolic process	708	1632	9350	24075	0.00016	0.04	LOC_Os09g19530	transposon protein, putative, unclassified, expressed
D or OD	>=3	SBP	GO:0044260	P	cellular macromolecule metabolic process	708	1632	9350	24075	0.00016	0.04	LOC_Os03g33500	retrotransposon protein, putative, unclassified, expressed
D or OD	>=3	SBP	GO:0044260	P	cellular macromolecule metabolic process	708	1632	9350	24075	0.00016	0.04	LOC_Os08g24240	retrotransposon protein, putative, Ty3-gypsy subclass
D or OD	>=3	SBP	GO:0044260	P	cellular macromolecule metabolic process	708	1632	9350	24075	0.00016	0.04	LOC_Os06g43270	protein kinase domain containing protein, expressed
D or OD	>=3	SBP	GO:0044260	P	cellular macromolecule metabolic process	708	1632	9350	24075	0.00016	0.04	LOC_Os08g26910	retrotransposon protein, putative, Ty3-gypsy subclass, expressed
D or OD	>=3	SBP	GO:0044260	P	cellular macromolecule metabolic process	708	1632	9350	24075	0.00016	0.04	LOC_Os10g11954	retrotransposon protein, putative, unclassified, expressed
D or OD	>=3	SBP	GO:0044260	P	cellular macromolecule metabolic process	708	1632	9350	24075	0.00016	0.04	LOC_Os07g25360	retrotransposon protein, putative, unclassified, expressed
D or OD	>=3	SBP	GO:0044260	P	cellular macromolecule metabolic process	708	1632	9350	24075	0.00016	0.04	LOC_Os10g10920	retrotransposon protein, putative, Ty3-gypsy subclass
D or OD	>=3	SBP	GO:0044260	P	cellular macromolecule metabolic process	708	1632	9350	24075	0.00016	0.04	LOC_Os06g38590	receptor-like protein kinase precursor, putative, expressed
D or OD	>=3	SBP	GO:0044260	P	cellular macromolecule metabolic process	708	1632	9350	24075	0.00016	0.04	LOC_Os07g24810	retrotransposon protein, putative, unclassified, expressed
D or OD	>=3	SBP	GO:0044260	P	cellular macromolecule metabolic process	708	1632	9350	24075	0.00016	0.04	LOC_Os07g23244	ribosomal protein L23 family protein, putative, expressed
D or OD	>=3	SBP	GO:0044260	P	cellular macromolecule metabolic process	708	1632	9350	24075	0.00016	0.04	LOC_Os03g33680	retrotransposon protein, putative, Ty3-gypsy subclass, expressed
D or OD	>=3	SBP	GO:0044260	P	cellular macromolecule metabolic process	708	1632	9350	24075	0.00016	0.04	LOC_Os12g32400	helix-loop-helix DNA-binding domain containing protein, expressed
D or OD	>=3	SBP	GO:0044260	P	cellular macromolecule metabolic process	708	1632	9350	24075	0.00016	0.04	LOC_Os04g04990	retrotransposon protein, putative, Ty1-copia subclass, expressed
D or OD	>=3	SBP	GO:0044260	P	cellular macromolecule metabolic process	708	1632	9350	24075	0.00016	0.04	LOC_Os08g38990	WRKY30, expressed
D or OD	>=3	SBP	GO:0044260	P	cellular macromolecule metabolic process	708	1632	9350	24075	0.00016	0.04	LOC_Os09g07010	retrotransposon protein, putative, unclassified, expressed
D or OD	>=3	SBP	GO:0044260	P	cellular macromolecule metabolic process	708	1632	9350	24075	0.00016	0.04	LOC_Os08g09800	WRKY105, expressed
D or OD	>=3	SBP	GO:0044260	P	cellular macromolecule metabolic process	708	1632	9350	24075	0.00016	0.04	LOC_Os09g19380	receptor-like protein kinase precursor, putative, expressed
D or OD	>=3	SBP	GO:0044260	P	cellular macromolecule metabolic process	708	1632	9350	24075	0.00016	0.04	LOC_Os09g19229	protein kinase domain containing protein, expressed
D or OD	>=3	SBP	GO:0044260	P	cellular macromolecule metabolic process	708	1632	9350	24075	0.00016	0.04	LOC_Os04g06430	retrotransposon protein, putative, Ty3-gypsy subclass, expressed
D or OD	>=3	SBP	GO:0044260	P	cellular macromolecule metabolic process	708	1632	9350	24075	0.00016	0.04	LOC_Os04g29290	retrotransposon protein, putative, unclassified
D or OD	>=3	SBP	GO:0044260	P	cellular macromolecule metabolic process	708	1632	9350	24075	0.00016	0.04	LOC_Os09g31180	ribosomal protein L6, putative, expressed
D or OD	>=3	SBP	GO:0044260	P	cellular macromolecule metabolic process	708	1632	9350	24075	0.00016	0.04	LOC_Os07g17610	retrotransposon protein, putative, Ty3-gypsy subclass, expressed
D or OD	>=3	SBP	GO:0044260	P	cellular macromolecule metabolic process	708	1632	9350	24075	0.00016	0.04	LOC_Os06g50200	retrotransposon protein, putative, unclassified, expressed
D or OD	>=3	SBP	GO:0044260	P	cellular macromolecule metabolic process	708	1632	9350	24075	0.00016	0.04	LOC_Os12g33910	retrotransposon protein, putative, Ty3-gypsy subclass, expressed
D or OD	>=3	SBP	GO:0044260	P	cellular macromolecule metabolic process	708	1632	9350	24075	0.00016	0.04	LOC_Os09g19160	serine/threonine-protein kinase, putative, expressed
D or OD	>=3	SBP	GO:0044260	P	cellular macromolecule metabolic process	708	1632	9350	24075	0.00016	0.04	LOC_Os08g24630	protein kinase domain containing protein, expressed
D or OD	>=3	SBP	GO:0044260	P	cellular macromolecule metabolic process	708	1632	9350	24075	0.00016	0.04	LOC_Os07g17580	retrotransposon protein, putative, Ty3-gypsy subclass, expressed
D or OD	>=3	SBP	GO:0044260	P	cellular macromolecule metabolic process	708	1632	9350	24075	0.00016	0.04	LOC_Os10g10990	transcription initiation factor IIF, alpha subunit domain containing protein, expressed
D or OD	>=3	SBP	GO:0044260	P	cellular macromolecule metabolic process	708	1632	9350	24075	0.00016	0.04	LOC_Os09g14690	retrotransposon protein, putative, unclassified, expressed
D or OD	>=3	SBP	GO:0044260	P	cellular macromolecule metabolic process	708	1632	9350	24075	0.00016	0.04	LOC_Os12g32240	eukaryotic translation initiation factor 5A, putative, expressed
D or OD	>=3	SBP	GO:0044260	P	cellular macromolecule metabolic process	708	1632	9350	24075	0.00016	0.04	LOC_Os03g26130	MYB family transcription factor, putative, expressed
D or OD	>=3	SBP	GO:0044260	P	cellular macromolecule metabolic process	708	1632	9350	24075	0.00016	0.04	LOC_Os01g68370	B3 DNA binding domain containing protein, expressed
D or OD	>=3	SBP	GO:0044260	P	cellular macromolecule metabolic process	708	1632	9350	24075	0.00016	0.04	LOC_Os01g02550	protein kinase domain containing protein, expressed
D or OD	>=3	SBP	GO:0044260	P	cellular macromolecule metabolic process	708	1632	9350	24075	0.00016	0.04	LOC_Os11g24990	retrotransposon protein, putative, unclassified, expressed
D or OD	>=3	SBP	GO:0044260	P	cellular macromolecule metabolic process	708	1632	9350	24075	0.00016	0.04	LOC_Os04g05300	retrotransposon protein, putative, Ty3-gypsy subclass, expressed
D or OD	>=3	SBP	GO:0044260	P	cellular macromolecule metabolic process	708	1632	9350	24075	0.00016	0.04	LOC_Os02g45170	helix-loop-helix DNA-binding protein, putative, expressed
D or OD	>=3	SBP	GO:0044260	P	cellular macromolecule metabolic process	708	1632	9350	24075	0.00016	0.04	LOC_Os01g02410	protein kinase domain containing protein, expressed
D or OD	>=3	SBP	GO:0044260	P	cellular macromolecule metabolic process	708	1632	9350	24075	0.00016	0.04	LOC_Os04g04900	retrotransposon protein, putative, Ty3-gypsy subclass, expressed
D or OD	>=3	SBP	GO:0044260	P	cellular macromolecule metabolic process	708	1632	9350	24075	0.00016	0.04	LOC_Os03g27280	CAMK_CAMK_like.19 - CAMK includes calcium/calmodulin depedent protein kinases, expressed
D or OD	>=3	SBP	GO:0044260	P	cellular macromolecule metabolic process	708	1632	9350	24075	0.00016	0.04	LOC_Os06g43220	AP2 domain containing protein, expressed
D or OD	>=3	SBP	GO:0044260	P	cellular macromolecule metabolic process	708	1632	9350	24075	0.00016	0.04	LOC_Os06g40240	retrotransposon protein, putative, unclassified, expressed
D or OD	>=3	SBP	GO:0044260	P	cellular macromolecule metabolic process	708	1632	9350	24075	0.00016	0.04	LOC_Os03g35430	retrotransposon protein, putative, Ty3-gypsy subclass, expressed
D or OD	>=3	SBP	GO:0044260	P	cellular macromolecule metabolic process	708	1632	9350	24075	0.00016	0.04	LOC_Os06g39400	retrotransposon protein, putative, unclassified, expressed
D or OD	>=3	SBP	GO:0044260	P	cellular macromolecule metabolic process	708	1632	9350	24075	0.00016	0.04	LOC_Os06g38990	receptor-like protein kinase 2 precursor, putative, expressed
D or OD	>=3	SBP	GO:0044260	P	cellular macromolecule metabolic process	708	1632	9350	24075	0.00016	0.04	LOC_Os01g22890	retrotransposon protein, putative, Ty1-copia subclass, expressed
D or OD	>=3	SBP	GO:0044260	P	cellular macromolecule metabolic process	708	1632	9350	24075	0.00016	0.04	LOC_Os07g22710	CAMK_CAMK_like.32 - CAMK includes calcium/calmodulin depedent protein kinases, expressed
D or OD	>=3	SBP	GO:0044260	P	cellular macromolecule metabolic process	708	1632	9350	24075	0.00016	0.04	LOC_Os07g17720	retrotransposon protein, putative, Ty3-gypsy subclass
D or OD	>=3	SBP	GO:0044260	P	cellular macromolecule metabolic process	708	1632	9350	24075	0.00016	0.04	LOC_Os06g38970	expressed protein
D or OD	>=3	SBP	GO:0044260	P	cellular macromolecule metabolic process	708	1632	9350	24075	0.00016	0.04	LOC_Os09g07410	retrotransposon protein, putative, unclassified, expressed
D or OD	>=3	SBP	GO:0044260	P	cellular macromolecule metabolic process	708	1632	9350	24075	0.00016	0.04	LOC_Os06g39970	CESA11 - cellulose synthase, expressed
D or OD	>=3	SBP	GO:0044260	P	cellular macromolecule metabolic process	708	1632	9350	24075	0.00016	0.04	LOC_Os12g15820	retrotransposon protein, putative, Ty3-gypsy subclass, expressed
D or OD	>=3	SBP	GO:0044260	P	cellular macromolecule metabolic process	708	1632	9350	24075	0.00016	0.04	LOC_Os09g35000	flap endonuclease, putative, expressed
D or OD	>=3	SBP	GO:0044260	P	cellular macromolecule metabolic process	708	1632	9350	24075	0.00016	0.04	LOC_Os04g06110	retrotransposon protein, putative, Ty3-gypsy subclass, expressed
D or OD	>=3	SBP	GO:0044260	P	cellular macromolecule metabolic process	708	1632	9350	24075	0.00016	0.04	LOC_Os09g19620	retrotransposon protein, putative, unclassified
D or OD	>=3	SBP	GO:0044260	P	cellular macromolecule metabolic process	708	1632	9350	24075	0.00016	0.04	LOC_Os03g39432	CPuORF31 - conserved peptide uORF-containing transcript, expressed
D or OD	>=3	SBP	GO:0044260	P	cellular macromolecule metabolic process	708	1632	9350	24075	0.00016	0.04	LOC_Os01g28730	protein kinase domain containing protein, expressed
D or OD	>=3	SBP	GO:0044260	P	cellular macromolecule metabolic process	708	1632	9350	24075	0.00016	0.04	LOC_Os03g15160	retrotransposon protein, putative, Ty3-gypsy subclass, expressed
D or OD	>=3	SBP	GO:0044260	P	cellular macromolecule metabolic process	708	1632	9350	24075	0.00016	0.04	LOC_Os07g24310	retrotransposon protein, putative, unclassified, expressed
D or OD	>=3	SBP	GO:0044260	P	cellular macromolecule metabolic process	708	1632	9350	24075	0.00016	0.04	LOC_Os09g19290	retrotransposon protein, putative, unclassified, expressed
D or OD	>=3	SBP	GO:0044260	P	cellular macromolecule metabolic process	708	1632	9350	24075	0.00016	0.04	LOC_Os12g34054	mitochondrial ribosomal protein S3, putative, expressed
D or OD	>=3	SBP	GO:0044260	P	cellular macromolecule metabolic process	708	1632	9350	24075	0.00016	0.04	LOC_Os12g34056	mitochondrial 60S ribosomal protein L16, putative, expressed
D or OD	>=3	SBP	GO:0044260	P	cellular macromolecule metabolic process	708	1632	9350	24075	0.00016	0.04	LOC_Os07g22960	retrotransposon protein, putative, unclassified, expressed
D or OD	>=3	SBP	GO:0044260	P	cellular macromolecule metabolic process	708	1632	9350	24075	0.00016	0.04	LOC_Os06g38470	histone deacetylase 19, putative, expressed
D or OD	>=3	SBP	GO:0044260	P	cellular macromolecule metabolic process	708	1632	9350	24075	0.00016	0.04	LOC_Os12g31748	OsMADS20 - MADS-box family gene with MIKCc type-box, expressed
D or OD	>=3	SBP	GO:0044260	P	cellular macromolecule metabolic process	708	1632	9350	24075	0.00016	0.04	LOC_Os01g60520	WRKY116, expressed
D or OD	>=3	SBP	GO:0044260	P	cellular macromolecule metabolic process	708	1632	9350	24075	0.00016	0.04	LOC_Os12g33070	myb-like DNA-binding domain containing protein, putative, expressed
D or OD	>=3	SBP	GO:0044260	P	cellular macromolecule metabolic process	708	1632	9350	24075	0.00016	0.04	LOC_Os05g01256	helix-loop-helix DNA-binding domain containing protein, expressed
D or OD	>=3	SBP	GO:0044260	P	cellular macromolecule metabolic process	708	1632	9350	24075	0.00016	0.04	LOC_Os06g39700	DNA-directed RNA polymerase subunit alpha, putative, expressed
D or OD	>=3	SBP	GO:0044260	P	cellular macromolecule metabolic process	708	1632	9350	24075	0.00016	0.04	LOC_Os03g35540	retrotransposon protein, putative, unclassified, expressed
D or OD	>=3	SBP	GO:0044260	P	cellular macromolecule metabolic process	708	1632	9350	24075	0.00016	0.04	LOC_Os01g60440	HEAT repeat family protein, putative, expressed
D or OD	>=3	SBP	GO:0044260	P	cellular macromolecule metabolic process	708	1632	9350	24075	0.00016	0.04	LOC_Os01g23120	retrotransposon protein, putative, Ty3-gypsy subclass, expressed
D or OD	>=3	SBP	GO:0044260	P	cellular macromolecule metabolic process	708	1632	9350	24075	0.00016	0.04	LOC_Os12g33360	retrotransposon protein, putative, Ty3-gypsy subclass, expressed
D or OD	>=3	SBP	GO:0044260	P	cellular macromolecule metabolic process	708	1632	9350	24075	0.00016	0.04	LOC_Os07g22400	POLA3 - Putative DNA polymerase alpha complex subunit, expressed
D or OD	>=3	SBP	GO:0044260	P	cellular macromolecule metabolic process	708	1632	9350	24075	0.00016	0.04	LOC_Os01g23280	retrotransposon protein, putative, unclassified
D or OD	>=3	SBP	GO:0044260	P	cellular macromolecule metabolic process	708	1632	9350	24075	0.00016	0.04	LOC_Os08g09810	WRKY106, expressed
D or OD	>=3	SBP	GO:0044260	P	cellular macromolecule metabolic process	708	1632	9350	24075	0.00016	0.04	LOC_Os12g33240	mitochondrial ribosomal protein S10, putative, expressed
D or OD	>=3	SBP	GO:0044260	P	cellular macromolecule metabolic process	708	1632	9350	24075	0.00016	0.04	LOC_Os09g07430	retrotransposon, putative, centromere-specific, expressed
D or OD	>=3	SBP	GO:0044260	P	cellular macromolecule metabolic process	708	1632	9350	24075	0.00016	0.04	LOC_Os01g68420	OsMADS97 - MADS-box family gene with M-beta type-box, expressed
D or OD	>=3	SBP	GO:0044260	P	cellular macromolecule metabolic process	708	1632	9350	24075	0.00016	0.04	LOC_Os08g24650	retrotransposon protein, putative, Ty3-gypsy subclass, expressed
D or OD	>=3	SBP	GO:0044260	P	cellular macromolecule metabolic process	708	1632	9350	24075	0.00016	0.04	LOC_Os03g03164	homeobox protein knotted-1, putative, expressed
D or OD	>=3	SBP	GO:0044260	P	cellular macromolecule metabolic process	708	1632	9350	24075	0.00016	0.04	LOC_Os09g13510	retrotransposon protein, putative, unclassified, expressed
D or OD	>=3	SBP	GO:0044260	P	cellular macromolecule metabolic process	708	1632	9350	24075	0.00016	0.04	LOC_Os03g33012	WRKY81, expressed
D or OD	>=3	SBP	GO:0044260	P	cellular macromolecule metabolic process	708	1632	9350	24075	0.00016	0.04	LOC_Os02g45080	MYB family transcription factor, putative, expressed
D or OD	>=3	SBP	GO:0044260	P	cellular macromolecule metabolic process	708	1632	9350	24075	0.00016	0.04	LOC_Os12g33700	retrotransposon protein, putative, Ty3-gypsy subclass, expressed
D or OD	>=3	SBP	GO:0044260	P	cellular macromolecule metabolic process	708	1632	9350	24075	0.00016	0.04	LOC_Os12g16050	retrotransposon protein, putative, Ty3-gypsy subclass, expressed
D or OD	>=3	SBP	GO:0044260	P	cellular macromolecule metabolic process	708	1632	9350	24075	0.00016	0.04	LOC_Os03g26860	ribosomal protein, putative, expressed
D or OD	>=3	SBP	GO:0044260	P	cellular macromolecule metabolic process	708	1632	9350	24075	0.00016	0.04	LOC_Os06g39790	retrotransposon protein, putative, unclassified, expressed
D or OD	>=3	SBP	GO:0044260	P	cellular macromolecule metabolic process	708	1632	9350	24075	0.00016	0.04	LOC_Os08g25330	retrotransposon protein, putative, Ty3-gypsy subclass
D or OD	>=3	SBP	GO:0044260	P	cellular macromolecule metabolic process	708	1632	9350	24075	0.00016	0.04	LOC_Os12g15900	retrotransposon protein, putative, unclassified, expressed
D or OD	>=3	SBP	GO:0044260	P	cellular macromolecule metabolic process	708	1632	9350	24075	0.00016	0.04	LOC_Os01g10890	CAMK_KIN1/SNF1/Nim1_like.8 - CAMK includes calcium/calmodulin depedent protein kinases, expressed
D or OD	>=3	SBP	GO:0044260	P	cellular macromolecule metabolic process	708	1632	9350	24075	0.00016	0.04	LOC_Os11g18240	retrotransposon protein, putative, Ty3-gypsy subclass, expressed
D or OD	>=3	SBP	GO:0044260	P	cellular macromolecule metabolic process	708	1632	9350	24075	0.00016	0.04	LOC_Os03g33230	retrotransposon protein, putative, unclassified, expressed
D or OD	>=3	SBP	GO:0044260	P	cellular macromolecule metabolic process	708	1632	9350	24075	0.00016	0.04	LOC_Os06g43460	retrotransposon protein, putative, unclassified, expressed
D or OD	>=3	SBP	GO:0044260	P	cellular macromolecule metabolic process	708	1632	9350	24075	0.00016	0.04	LOC_Os06g40330	MYB family transcription factor, putative, expressed
D or OD	>=3	SBP	GO:0044260	P	cellular macromolecule metabolic process	708	1632	9350	24075	0.00016	0.04	LOC_Os12g32440	retrotransposon protein, putative, Ty1-copia subclass
D or OD	>=3	SBP	GO:0044260	P	cellular macromolecule metabolic process	708	1632	9350	24075	0.00016	0.04	LOC_Os04g04160	retrotransposon protein, putative, Ty3-gypsy subclass, expressed
D or OD	>=3	SBP	GO:0044260	P	cellular macromolecule metabolic process	708	1632	9350	24075	0.00016	0.04	LOC_Os01g02350	receptor-like kinase ARK1AS, putative, expressed
D or OD	>=3	SBP	GO:0044260	P	cellular macromolecule metabolic process	708	1632	9350	24075	0.00016	0.04	LOC_Os07g23040	retrotransposon protein, putative, unclassified, expressed
D or OD	>=3	SBP	GO:0044260	P	cellular macromolecule metabolic process	708	1632	9350	24075	0.00016	0.04	LOC_Os10g11680	retrotransposon protein, putative, unclassified, expressed
D or OD	>=3	SBP	GO:0044260	P	cellular macromolecule metabolic process	708	1632	9350	24075	0.00016	0.04	LOC_Os09g07270	retrotransposon protein, putative, Ty3-gypsy subclass, expressed
D or OD	>=3	SBP	GO:0044260	P	cellular macromolecule metabolic process	708	1632	9350	24075	0.00016	0.04	LOC_Os04g04710	retrotransposon protein, putative, unclassified, expressed
D or OD	>=3	SBP	GO:0044260	P	cellular macromolecule metabolic process	708	1632	9350	24075	0.00016	0.04	LOC_Os09g33986	peptidase, T1 family, putative, expressed
D or OD	>=3	SBP	GO:0044260	P	cellular macromolecule metabolic process	708	1632	9350	24075	0.00016	0.04	LOC_Os04g05470	protein kinase, putative, expressed
D or OD	>=3	SBP	GO:0044260	P	cellular macromolecule metabolic process	708	1632	9350	24075	0.00016	0.04	LOC_Os03g26390	retrotransposon protein, putative, Ty3-gypsy subclass, expressed
D or OD	>=3	SBP	GO:0044260	P	cellular macromolecule metabolic process	708	1632	9350	24075	0.00016	0.04	LOC_Os08g27090	ribosomal protein S17, putative, expressed
D or OD	>=3	SBP	GO:0044260	P	cellular macromolecule metabolic process	708	1632	9350	24075	0.00016	0.04	LOC_Os06g38010	retrotransposon protein, putative, Ty3-gypsy subclass, expressed
D or OD	>=3	SBP	GO:0044260	P	cellular macromolecule metabolic process	708	1632	9350	24075	0.00016	0.04	LOC_Os04g04490	retrotransposon protein, putative, Ty3-gypsy subclass, expressed
D or OD	>=3	SBP	GO:0044260	P	cellular macromolecule metabolic process	708	1632	9350	24075	0.00016	0.04	LOC_Os07g38120	CAMK_CAMK_like.34 - CAMK includes calcium/calmodulin depedent protein kinases, expressed
D or OD	>=3	SBP	GO:0044260	P	cellular macromolecule metabolic process	708	1632	9350	24075	0.00016	0.04	LOC_Os01g28760	retrotransposon protein, putative, Ty1-copia subclass, expressed
D or OD	>=3	SBP	GO:0044260	P	cellular macromolecule metabolic process	708	1632	9350	24075	0.00016	0.04	LOC_Os12g15630	retrotransposon protein, putative, unclassified, expressed
D or OD	>=3	SBP	GO:0044260	P	cellular macromolecule metabolic process	708	1632	9350	24075	0.00016	0.04	LOC_Os01g59990	ribosomal protein L24, putative, expressed
D or OD	>=3	SBP	GO:0044260	P	cellular macromolecule metabolic process	708	1632	9350	24075	0.00016	0.04	LOC_Os09g18530	nodulation receptor kinase precursor, putative, expressed
D or OD	>=3	SBP	GO:0044260	P	cellular macromolecule metabolic process	708	1632	9350	24075	0.00016	0.04	LOC_Os03g02680	cyclin-dependent kinase A-1, putative, expressed
D or OD	>=3	SBP	GO:0044260	P	cellular macromolecule metabolic process	708	1632	9350	24075	0.00016	0.04	LOC_Os06g50480	bZIP transcription factor domain containing protein, expressed
D or OD	>=3	SBP	GO:0044260	P	cellular macromolecule metabolic process	708	1632	9350	24075	0.00016	0.04	LOC_Os03g03360	ribosomal protein L5, putative, expressed
D or OD	>=3	SBP	GO:0044260	P	cellular macromolecule metabolic process	708	1632	9350	24075	0.00016	0.04	LOC_Os06g49040	Myb-like DNA-binding domain containing protein, putative, expressed
D or OD	>=3	SBP	GO:0044260	P	cellular macromolecule metabolic process	708	1632	9350	24075	0.00016	0.04	LOC_Os06g39906	homeobox domain containing protein, expressed
D or OD	>=3	SBP	GO:0044260	P	cellular macromolecule metabolic process	708	1632	9350	24075	0.00016	0.04	LOC_Os03g34140	retrotransposon protein, putative, Ty1-copia subclass
D or OD	>=3	SBP	GO:0044260	P	cellular macromolecule metabolic process	708	1632	9350	24075	0.00016	0.04	LOC_Os07g24450	retrotransposon protein, putative, unclassified
D or OD	>=3	SBP	GO:0044260	P	cellular macromolecule metabolic process	708	1632	9350	24075	0.00016	0.04	LOC_Os12g31960	retrotransposon protein, putative, LINE subclass, expressed
D or OD	>=3	SBP	GO:0044260	P	cellular macromolecule metabolic process	708	1632	9350	24075	0.00016	0.04	LOC_Os04g06330	retrotransposon, putative, centromere-specific
D or OD	>=3	SBP	GO:0044260	P	cellular macromolecule metabolic process	708	1632	9350	24075	0.00016	0.04	LOC_Os01g59570	senescence-induced receptor-like serine/threonine-protein kinase precursor, putative, expressed
D or OD	>=3	SBP	GO:0044260	P	cellular macromolecule metabolic process	708	1632	9350	24075	0.00016	0.04	LOC_Os03g27930	RNA cap guanine-N2 methyltransferase domain containing protein, expressed
D or OD	>=3	SBP	GO:0044260	P	cellular macromolecule metabolic process	708	1632	9350	24075	0.00016	0.04	LOC_Os04g05580	kinase, putative, expressed
D or OD	>=3	SBP	GO:0044260	P	cellular macromolecule metabolic process	708	1632	9350	24075	0.00016	0.04	LOC_Os03g33640	retrotransposon protein, putative, Ty1-copia subclass, expressed
D or OD	>=3	SBP	GO:0044260	P	cellular macromolecule metabolic process	708	1632	9350	24075	0.00016	0.04	LOC_Os06g38650	receptor-like protein kinase precursor, putative, expressed
D or OD	>=3	SBP	GO:0044260	P	cellular macromolecule metabolic process	708	1632	9350	24075	0.00016	0.04	LOC_Os10g22210	retrotransposon protein, putative, unclassified, expressed
D or OD	>=3	SBP	GO:0044260	P	cellular macromolecule metabolic process	708	1632	9350	24075	0.00016	0.04	LOC_Os03g33880	retrotransposon protein, putative, unclassified, expressed
D or OD	>=3	SBP	GO:0044260	P	cellular macromolecule metabolic process	708	1632	9350	24075	0.00016	0.04	LOC_Os01g12420	receptor-like protein kinase, putative, expressed
D or OD	>=3	SBP	GO:0044260	P	cellular macromolecule metabolic process	708	1632	9350	24075	0.00016	0.04	LOC_Os09g34060	transcription factor RF2a, putative, expressed
D or OD	>=3	SBP	GO:0044260	P	cellular macromolecule metabolic process	708	1632	9350	24075	0.00016	0.04	LOC_Os02g44440	retrotransposon protein, putative, unclassified, expressed
D or OD	>=3	SBP	GO:0044260	P	cellular macromolecule metabolic process	708	1632	9350	24075	0.00016	0.04	LOC_Os11g25350	retrotransposon protein, putative, unclassified
D or OD	>=3	SBP	GO:0044260	P	cellular macromolecule metabolic process	708	1632	9350	24075	0.00016	0.04	LOC_Os06g41580	LGC1, putative, expressed
D or OD	>=3	SBP	GO:0044260	P	cellular macromolecule metabolic process	708	1632	9350	24075	0.00016	0.04	LOC_Os01g41960	retrotransposon protein, putative, unclassified, expressed
D or OD	>=3	SBP	GO:0044260	P	cellular macromolecule metabolic process	708	1632	9350	24075	0.00016	0.04	LOC_Os06g39930	retrotransposon protein, putative, unclassified, expressed
D or OD	>=3	SBP	GO:0044260	P	cellular macromolecule metabolic process	708	1632	9350	24075	0.00016	0.04	LOC_Os06g38340	receptor-like protein kinase precursor, putative, expressed
D or OD	>=3	SBP	GO:0044260	P	cellular macromolecule metabolic process	708	1632	9350	24075	0.00016	0.04	LOC_Os02g45130	protein kinase, putative, expressed
D or OD	>=3	SBP	GO:0044260	P	cellular macromolecule metabolic process	708	1632	9350	24075	0.00016	0.04	LOC_Os03g35740	retrotransposon protein, putative, Ty3-gypsy subclass, expressed
D or OD	>=3	SBP	GO:0044260	P	cellular macromolecule metabolic process	708	1632	9350	24075	0.00016	0.04	LOC_Os09g07120	DNA-directed RNA polymerase 1B, mitochondrial precursor, putative, expressed
D or OD	>=3	SBP	GO:0044260	P	cellular macromolecule metabolic process	708	1632	9350	24075	0.00016	0.04	LOC_Os10g34750	LIG1 - Putative DNA ligase I, expressed
D or OD	>=3	SBP	GO:0044260	P	cellular macromolecule metabolic process	708	1632	9350	24075	0.00016	0.04	LOC_Os06g43280	paxneb-related protein, putative, expressed
D or OD	>=3	SBP	GO:0044260	P	cellular macromolecule metabolic process	708	1632	9350	24075	0.00016	0.04	LOC_Os08g24470	expressed protein
D or OD	>=3	SBP	GO:0044260	P	cellular macromolecule metabolic process	708	1632	9350	24075	0.00016	0.04	LOC_Os07g24350	homeobox domain containing protein, expressed
D or OD	>=3	SBP	GO:0044260	P	cellular macromolecule metabolic process	708	1632	9350	24075	0.00016	0.04	LOC_Os12g15700	retrotransposon protein, putative, unclassified, expressed
D or OD	>=3	SBP	GO:0044260	P	cellular macromolecule metabolic process	708	1632	9350	24075	0.00016	0.04	LOC_Os12g34090	retrotransposon protein, putative, Ty3-gypsy subclass, expressed
D or OD	>=3	SBP	GO:0044260	P	cellular macromolecule metabolic process	708	1632	9350	24075	0.00016	0.04	LOC_Os08g24570	retrotransposon protein, putative, Ty3-gypsy subclass, expressed
D or OD	>=3	SBP	GO:0044260	P	cellular macromolecule metabolic process	708	1632	9350	24075	0.00016	0.04	LOC_Os12g34092	ribosomal protein S2, putative, expressed
D or OD	>=3	SBP	GO:0044260	P	cellular macromolecule metabolic process	708	1632	9350	24075	0.00016	0.04	LOC_Os08g39174	retrotransposon protein, putative, Ty1-copia subclass, expressed
D or OD	>=3	SBP	GO:0044260	P	cellular macromolecule metabolic process	708	1632	9350	24075	0.00016	0.04	LOC_Os06g06970	AP2 domain containing protein, expressed
D or OD	>=3	SBP	GO:0044260	P	cellular macromolecule metabolic process	708	1632	9350	24075	0.00016	0.04	LOC_Os01g11260	phospho-N-acetylmuramoyl-pentapeptide-transferase, putative, expressed
D or OD	>=3	SBP	GO:0044260	P	cellular macromolecule metabolic process	708	1632	9350	24075	0.00016	0.04	LOC_Os01g11910	basic helix-loop-helix, putative, expressed
D or OD	>=3	SBP	GO:0044260	P	cellular macromolecule metabolic process	708	1632	9350	24075	0.00016	0.04	LOC_Os07g38340	retrotransposon protein, putative, Ty3-gypsy subclass, expressed
D or OD	>=3	SBP	GO:0044260	P	cellular macromolecule metabolic process	708	1632	9350	24075	0.00016	0.04	LOC_Os06g42990	AP2 domain containing protein, expressed
D or OD	>=3	SBP	GO:0044260	P	cellular macromolecule metabolic process	708	1632	9350	24075	0.00016	0.04	LOC_Os01g02540	retrotransposon protein, putative, unclassified, expressed
D or OD	>=3	SBP	GO:0044260	P	cellular macromolecule metabolic process	708	1632	9350	24075	0.00016	0.04	LOC_Os01g59500	U3 small nucleolar RNA-associated protein 11, putative, expressed
D or OD	>=3	SBP	GO:0044260	P	cellular macromolecule metabolic process	708	1632	9350	24075	0.00016	0.04	LOC_Os06g40110	RNA polymerase Rpc34 subunit family protein, expressed
D or OD	>=3	SBP	GO:0044260	P	cellular macromolecule metabolic process	708	1632	9350	24075	0.00016	0.04	LOC_Os01g23470	retrotransposon protein, putative, Ty1-copia subclass, expressed
D or OD	>=3	SBP	GO:0044260	P	cellular macromolecule metabolic process	708	1632	9350	24075	0.00016	0.04	LOC_Os07g24970	retrotransposon protein, putative, Ty3-gypsy subclass, expressed
D or OD	>=3	SBP	GO:0044260	P	cellular macromolecule metabolic process	708	1632	9350	24075	0.00016	0.04	LOC_Os12g15670	retrotransposon protein, putative, unclassified, expressed
D or OD	>=3	SBP	GO:0044260	P	cellular macromolecule metabolic process	708	1632	9350	24075	0.00016	0.04	LOC_Os04g06610	retrotransposon protein, putative, Ty3-gypsy subclass, expressed
D or OD	>=3	SBP	GO:0044260	P	cellular macromolecule metabolic process	708	1632	9350	24075	0.00016	0.04	LOC_Os01g10900	MRH1, putative, expressed
D or OD	>=3	SBP	GO:0044260	P	cellular macromolecule metabolic process	708	1632	9350	24075	0.00016	0.04	LOC_Os03g39330	retrotransposon protein, putative, Ty3-gypsy subclass, expressed
D or OD	>=3	SBP	GO:0044260	P	cellular macromolecule metabolic process	708	1632	9350	24075	0.00016	0.04	LOC_Os06g39840	retrotransposon protein, putative, unclassified, expressed
D or OD	>=3	SBP	GO:0044260	P	cellular macromolecule metabolic process	708	1632	9350	24075	0.00016	0.04	LOC_Os04g29330	retrotransposon protein, putative, Ty3-gypsy subclass, expressed
D or OD	>=3	SBP	GO:0044260	P	cellular macromolecule metabolic process	708	1632	9350	24075	0.00016	0.04	LOC_Os06g50340	receptor protein kinase CLAVATA1 precursor, putative, expressed
D or OD	>=3	SBP	GO:0044260	P	cellular macromolecule metabolic process	708	1632	9350	24075	0.00016	0.04	LOC_Os03g28110	retrotransposon protein, putative, unclassified, expressed
D or OD	>=3	SBP	GO:0044260	P	cellular macromolecule metabolic process	708	1632	9350	24075	0.00016	0.04	LOC_Os07g22680	SKP1-like protein 1B, putative, expressed
D or OD	>=3	SBP	GO:0044260	P	cellular macromolecule metabolic process	708	1632	9350	24075	0.00016	0.04	LOC_Os06g43030	protein kinase domain containing protein, expressed
D or OD	>=3	SBP	GO:0044260	P	cellular macromolecule metabolic process	708	1632	9350	24075	0.00016	0.04	LOC_Os03g33819	retrotransposon protein, putative, unclassified, expressed
D or OD	>=3	SBP	GO:0044260	P	cellular macromolecule metabolic process	708	1632	9350	24075	0.00016	0.04	LOC_Os03g39500	retrotransposon protein, putative, Ty3-gypsy subclass, expressed
D or OD	>=3	SBP	GO:0044260	P	cellular macromolecule metabolic process	708	1632	9350	24075	0.00016	0.04	LOC_Os04g05710	retrotransposon protein, putative, Ty3-gypsy subclass, expressed
D or OD	>=3	SBP	GO:0044260	P	cellular macromolecule metabolic process	708	1632	9350	24075	0.00016	0.04	LOC_Os04g04530	retrotransposon protein, putative, Ty3-gypsy subclass, expressed
D or OD	>=3	SBP	GO:0044260	P	cellular macromolecule metabolic process	708	1632	9350	24075	0.00016	0.04	LOC_Os07g37200	transposon protein, putative, unclassified, expressed
D or OD	>=3	SBP	GO:0044260	P	cellular macromolecule metabolic process	708	1632	9350	24075	0.00016	0.04	LOC_Os01g68350	retrotransposon protein, putative, unclassified, expressed
D or OD	>=3	SBP	GO:0044260	P	cellular macromolecule metabolic process	708	1632	9350	24075	0.00016	0.04	LOC_Os01g23270	retrotransposon protein, putative, Ty3-gypsy subclass, expressed
D or OD	>=3	SBP	GO:0044260	P	cellular macromolecule metabolic process	708	1632	9350	24075	0.00016	0.04	LOC_Os03g15520	transposon protein, putative, unclassified, expressed
D or OD	>=3	SBP	GO:0044260	P	cellular macromolecule metabolic process	708	1632	9350	24075	0.00016	0.04	LOC_Os12g34180	retrotransposon protein, putative, Ty3-gypsy subclass, expressed
D or OD	>=3	SBP	GO:0044260	P	cellular macromolecule metabolic process	708	1632	9350	24075	0.00016	0.04	LOC_Os03g15450	retrotransposon protein, putative, Ty3-gypsy subclass, expressed
D or OD	>=3	SBP	GO:0044260	P	cellular macromolecule metabolic process	708	1632	9350	24075	0.00016	0.04	LOC_Os04g04120	retrotransposon protein, putative, Ty1-copia subclass, expressed
D or OD	>=3	SBP	GO:0044260	P	cellular macromolecule metabolic process	708	1632	9350	24075	0.00016	0.04	LOC_Os01g60270	homeobox domain containing protein, expressed
D or OD	>=3	SBP	GO:0044260	P	cellular macromolecule metabolic process	708	1632	9350	24075	0.00016	0.04	LOC_Os10g34890	retrotransposon protein, putative, Ty1-copia subclass, expressed
D or OD	>=3	SBP	GO:0044260	P	cellular macromolecule metabolic process	708	1632	9350	24075	0.00016	0.04	LOC_Os09g07230	retrotransposon protein, putative, unclassified, expressed
D or OD	>=3	SBP	GO:0044260	P	cellular macromolecule metabolic process	708	1632	9350	24075	0.00016	0.04	LOC_Os08g27110	retrotransposon protein, putative, Ty3-gypsy subclass, expressed
D or OD	>=3	SBP	GO:0044260	P	cellular macromolecule metabolic process	708	1632	9350	24075	0.00016	0.04	LOC_Os12g33330	retrotransposon protein, putative, Ty3-gypsy subclass, expressed
D or OD	>=3	SBP	GO:0044260	P	cellular macromolecule metabolic process	708	1632	9350	24075	0.00016	0.04	LOC_Os07g22430	retrotransposon protein, putative, unclassified, expressed
D or OD	>=3	SBP	GO:0044260	P	cellular macromolecule metabolic process	708	1632	9350	24075	0.00016	0.04	LOC_Os03g26290	retrotransposon protein, putative, unclassified, expressed
D or OD	>=3	SBP	GO:0044260	P	cellular macromolecule metabolic process	708	1632	9350	24075	0.00016	0.04	LOC_Os03g33280	retrotransposon protein, putative, Ty3-gypsy subclass, expressed
D or OD	>=3	SBP	GO:0044260	P	cellular macromolecule metabolic process	708	1632	9350	24075	0.00016	0.04	LOC_Os06g37750	S-locus-like receptor protein kinase, putative, expressed
D or OD	>=3	SBP	GO:0044260	P	cellular macromolecule metabolic process	708	1632	9350	24075	0.00016	0.04	LOC_Os01g59600	peptidase, T1 family, putative, expressed
D or OD	>=3	SBP	GO:0044260	P	cellular macromolecule metabolic process	708	1632	9350	24075	0.00016	0.04	LOC_Os07g25002	chloroplast 30S ribosomal protein S7, putative, expressed
D or OD	>=3	SBP	GO:0044260	P	cellular macromolecule metabolic process	708	1632	9350	24075	0.00016	0.04	LOC_Os07g25000	retrotransposon protein, putative, Ty3-gypsy subclass
D or OD	>=3	SBP	GO:0044260	P	cellular macromolecule metabolic process	708	1632	9350	24075	0.00016	0.04	LOC_Os07g23480	retrotransposon protein, putative, unclassified, expressed
D or OD	>=3	SBP	GO:0044260	P	cellular macromolecule metabolic process	708	1632	9350	24075	0.00016	0.04	LOC_Os03g02900	B3 DNA binding domain containing protein, expressed
D or OD	>=3	SBP	GO:0044260	P	cellular macromolecule metabolic process	708	1632	9350	24075	0.00016	0.04	LOC_Os03g33042	retrotransposon protein, putative, unclassified, expressed
D or OD	>=3	SBP	GO:0044260	P	cellular macromolecule metabolic process	708	1632	9350	24075	0.00016	0.04	LOC_Os10g11920	retrotransposon protein, putative, Ty3-gypsy subclass, expressed
D or OD	>=3	SBP	GO:0044260	P	cellular macromolecule metabolic process	708	1632	9350	24075	0.00016	0.04	LOC_Os11g45420	retrotransposon protein, putative, unclassified, expressed
D or OD	>=3	SBP	GO:0044260	P	cellular macromolecule metabolic process	708	1632	9350	24075	0.00016	0.04	LOC_Os03g26890	retrotransposon protein, putative, Ty3-gypsy subclass, expressed
D or OD	>=3	SBP	GO:0044260	P	cellular macromolecule metabolic process	708	1632	9350	24075	0.00016	0.04	LOC_Os03g39590	retrotransposon protein, putative, unclassified, expressed
D or OD	>=3	SBP	GO:0015074	P	DNA integration	267	1632	3168	24075	0.00019	0.04	LOC_Os04g53040	retrotransposon protein, putative, unclassified, expressed
D or OD	>=3	SBP	GO:0015074	P	DNA integration	267	1632	3168	24075	0.00019	0.04	LOC_Os03g33300	retrotransposon, putative, centromere-specific, expressed
D or OD	>=3	SBP	GO:0015074	P	DNA integration	267	1632	3168	24075	0.00019	0.04	LOC_Os04g05970	retrotransposon protein, putative, Ty3-gypsy subclass, expressed
D or OD	>=3	SBP	GO:0015074	P	DNA integration	267	1632	3168	24075	0.00019	0.04	LOC_Os03g33819	retrotransposon protein, putative, unclassified, expressed
D or OD	>=3	SBP	GO:0015074	P	DNA integration	267	1632	3168	24075	0.00019	0.04	LOC_Os06g40270	retrotransposon protein, putative, unclassified
D or OD	>=3	SBP	GO:0015074	P	DNA integration	267	1632	3168	24075	0.00019	0.04	LOC_Os08g09140	retrotransposon protein, putative, Ty3-gypsy subclass, expressed
D or OD	>=3	SBP	GO:0015074	P	DNA integration	267	1632	3168	24075	0.00019	0.04	LOC_Os02g44070	retrotransposon protein, putative, unclassified, expressed
D or OD	>=3	SBP	GO:0015074	P	DNA integration	267	1632	3168	24075	0.00019	0.04	LOC_Os01g23020	retrotransposon protein, putative, Ty3-gypsy subclass, expressed
D or OD	>=3	SBP	GO:0015074	P	DNA integration	267	1632	3168	24075	0.00019	0.04	LOC_Os07g17610	retrotransposon protein, putative, Ty3-gypsy subclass, expressed
D or OD	>=3	SBP	GO:0015074	P	DNA integration	267	1632	3168	24075	0.00019	0.04	LOC_Os08g24690	retrotransposon protein, putative, unclassified, expressed
D or OD	>=3	SBP	GO:0015074	P	DNA integration	267	1632	3168	24075	0.00019	0.04	LOC_Os06g43150	retrotransposon protein, putative, unclassified, expressed
D or OD	>=3	SBP	GO:0015074	P	DNA integration	267	1632	3168	24075	0.00019	0.04	LOC_Os07g17580	retrotransposon protein, putative, Ty3-gypsy subclass, expressed
D or OD	>=3	SBP	GO:0015074	P	DNA integration	267	1632	3168	24075	0.00019	0.04	LOC_Os03g26570	retrotransposon protein, putative, unclassified, expressed
D or OD	>=3	SBP	GO:0015074	P	DNA integration	267	1632	3168	24075	0.00019	0.04	LOC_Os07g25090	retrotransposon protein, putative, Ty3-gypsy subclass, expressed
D or OD	>=3	SBP	GO:0015074	P	DNA integration	267	1632	3168	24075	0.00019	0.04	LOC_Os04g04150	retrotransposon protein, putative, Ty3-gypsy subclass, expressed
D or OD	>=3	SBP	GO:0015074	P	DNA integration	267	1632	3168	24075	0.00019	0.04	LOC_Os04g06374	retrotransposon protein, putative, Ty3-gypsy subclass, expressed
D or OD	>=3	SBP	GO:0015074	P	DNA integration	267	1632	3168	24075	0.00019	0.04	LOC_Os01g23550	retrotransposon protein, putative, unclassified, expressed
D or OD	>=3	SBP	GO:0015074	P	DNA integration	267	1632	3168	24075	0.00019	0.04	LOC_Os10g12030	retrotransposon protein, putative, unclassified, expressed
D or OD	>=3	SBP	GO:0015074	P	DNA integration	267	1632	3168	24075	0.00019	0.04	LOC_Os04g05220	retrotransposon protein, putative, Ty3-gypsy subclass
D or OD	>=3	SBP	GO:0015074	P	DNA integration	267	1632	3168	24075	0.00019	0.04	LOC_Os03g02350	transposon protein, putative, unclassified, expressed
D or OD	>=3	SBP	GO:0015074	P	DNA integration	267	1632	3168	24075	0.00019	0.04	LOC_Os10g34640	retrotransposon protein, putative, unclassified
D or OD	>=3	SBP	GO:0015074	P	DNA integration	267	1632	3168	24075	0.00019	0.04	LOC_Os07g22750	retrotransposon, putative, centromere-specific, expressed
D or OD	>=3	SBP	GO:0015074	P	DNA integration	267	1632	3168	24075	0.00019	0.04	LOC_Os04g06120	retrotransposon protein, putative, Ty3-gypsy subclass, expressed
D or OD	>=3	SBP	GO:0015074	P	DNA integration	267	1632	3168	24075	0.00019	0.04	LOC_Os04g05670	retrotransposon protein, putative, Ty3-gypsy subclass, expressed
D or OD	>=3	SBP	GO:0015074	P	DNA integration	267	1632	3168	24075	0.00019	0.04	LOC_Os09g13540	retrotransposon protein, putative, unclassified, expressed
D or OD	>=3	SBP	GO:0015074	P	DNA integration	267	1632	3168	24075	0.00019	0.04	LOC_Os10g22250	retrotransposon protein, putative, Ty3-gypsy subclass, expressed
D or OD	>=3	SBP	GO:0015074	P	DNA integration	267	1632	3168	24075	0.00019	0.04	LOC_Os04g05300	retrotransposon protein, putative, Ty3-gypsy subclass, expressed
D or OD	>=3	SBP	GO:0015074	P	DNA integration	267	1632	3168	24075	0.00019	0.04	LOC_Os08g24040	retrotransposon protein, putative, unclassified, expressed
D or OD	>=3	SBP	GO:0015074	P	DNA integration	267	1632	3168	24075	0.00019	0.04	LOC_Os04g04900	retrotransposon protein, putative, Ty3-gypsy subclass, expressed
D or OD	>=3	SBP	GO:0015074	P	DNA integration	267	1632	3168	24075	0.00019	0.04	LOC_Os06g49270	retrotransposon protein, putative, Ty1-copia subclass, expressed
D or OD	>=3	SBP	GO:0015074	P	DNA integration	267	1632	3168	24075	0.00019	0.04	LOC_Os03g33760	retrotransposon protein, putative, unclassified, expressed
D or OD	>=3	SBP	GO:0015074	P	DNA integration	267	1632	3168	24075	0.00019	0.04	LOC_Os07g24520	retrotransposon protein, putative, Ty3-gypsy subclass, expressed
D or OD	>=3	SBP	GO:0015074	P	DNA integration	267	1632	3168	24075	0.00019	0.04	LOC_Os08g24500	retrotransposon protein, putative, Ty3-gypsy subclass, expressed
D or OD	>=3	SBP	GO:0015074	P	DNA integration	267	1632	3168	24075	0.00019	0.04	LOC_Os01g23090	retrotransposon protein, putative, Ty1-copia subclass, expressed
D or OD	>=3	SBP	GO:0015074	P	DNA integration	267	1632	3168	24075	0.00019	0.04	LOC_Os03g34190	retrotransposon protein, putative, Ty3-gypsy subclass, expressed
D or OD	>=3	SBP	GO:0015074	P	DNA integration	267	1632	3168	24075	0.00019	0.04	LOC_Os07g22420	retrotransposon protein, putative, Ty3-gypsy subclass, expressed
D or OD	>=3	SBP	GO:0015074	P	DNA integration	267	1632	3168	24075	0.00019	0.04	LOC_Os08g29420	retrotransposon protein, putative, Ty3-gypsy subclass, expressed
D or OD	>=3	SBP	GO:0015074	P	DNA integration	267	1632	3168	24075	0.00019	0.04	LOC_Os11g18420	retrotransposon protein, putative, Ty3-gypsy subclass
D or OD	>=3	SBP	GO:0015074	P	DNA integration	267	1632	3168	24075	0.00019	0.04	LOC_Os03g35430	retrotransposon protein, putative, Ty3-gypsy subclass, expressed
D or OD	>=3	SBP	GO:0015074	P	DNA integration	267	1632	3168	24075	0.00019	0.04	LOC_Os03g33700	retrotransposon protein, putative, unclassified, expressed
D or OD	>=3	SBP	GO:0015074	P	DNA integration	267	1632	3168	24075	0.00019	0.04	LOC_Os08g38930	retrotransposon protein, putative, Ty3-gypsy subclass
D or OD	>=3	SBP	GO:0015074	P	DNA integration	267	1632	3168	24075	0.00019	0.04	LOC_Os01g22890	retrotransposon protein, putative, Ty1-copia subclass, expressed
D or OD	>=3	SBP	GO:0015074	P	DNA integration	267	1632	3168	24075	0.00019	0.04	LOC_Os10g11990	retrotransposon protein, putative, Ty1-copia subclass, expressed
D or OD	>=3	SBP	GO:0015074	P	DNA integration	267	1632	3168	24075	0.00019	0.04	LOC_Os03g33940	retrotransposon protein, putative, unclassified, expressed
D or OD	>=3	SBP	GO:0015074	P	DNA integration	267	1632	3168	24075	0.00019	0.04	LOC_Os06g38260	retrotransposon protein, putative, Ty3-gypsy subclass, expressed
D or OD	>=3	SBP	GO:0015074	P	DNA integration	267	1632	3168	24075	0.00019	0.04	LOC_Os07g24400	retrotransposon protein, putative, Ty3-gypsy subclass, expressed
D or OD	>=3	SBP	GO:0015074	P	DNA integration	267	1632	3168	24075	0.00019	0.04	LOC_Os07g24450	retrotransposon protein, putative, unclassified
D or OD	>=3	SBP	GO:0015074	P	DNA integration	267	1632	3168	24075	0.00019	0.04	LOC_Os09g07410	retrotransposon protein, putative, unclassified, expressed
D or OD	>=3	SBP	GO:0015074	P	DNA integration	267	1632	3168	24075	0.00019	0.04	LOC_Os01g58710	retrotransposon protein, putative, Ty3-gypsy subclass, expressed
D or OD	>=3	SBP	GO:0015074	P	DNA integration	267	1632	3168	24075	0.00019	0.04	LOC_Os03g32960	retrotransposon protein, putative, Ty3-gypsy subclass, expressed
D or OD	>=3	SBP	GO:0015074	P	DNA integration	267	1632	3168	24075	0.00019	0.04	LOC_Os04g05900	retrotransposon protein, putative, Ty3-gypsy subclass, expressed
D or OD	>=3	SBP	GO:0015074	P	DNA integration	267	1632	3168	24075	0.00019	0.04	LOC_Os07g23300	retrotransposon protein, putative, unclassified, expressed
D or OD	>=3	SBP	GO:0015074	P	DNA integration	267	1632	3168	24075	0.00019	0.04	LOC_Os07g22410	retrotransposon protein, putative, Ty3-gypsy subclass, expressed
D or OD	>=3	SBP	GO:0015074	P	DNA integration	267	1632	3168	24075	0.00019	0.04	LOC_Os12g15700	retrotransposon protein, putative, unclassified, expressed
D or OD	>=3	SBP	GO:0015074	P	DNA integration	267	1632	3168	24075	0.00019	0.04	LOC_Os08g24530	retrotransposon protein, putative, Ty3-gypsy subclass, expressed
D or OD	>=3	SBP	GO:0015074	P	DNA integration	267	1632	3168	24075	0.00019	0.04	LOC_Os12g33700	retrotransposon protein, putative, Ty3-gypsy subclass, expressed
D or OD	>=3	SBP	GO:0015074	P	DNA integration	267	1632	3168	24075	0.00019	0.04	LOC_Os12g15900	retrotransposon protein, putative, unclassified, expressed
D or OD	>=3	SBP	GO:0015074	P	DNA integration	267	1632	3168	24075	0.00019	0.04	LOC_Os03g33780	retrotransposon protein, putative, Ty3-gypsy subclass, expressed
D or OD	>=3	SBP	GO:0015074	P	DNA integration	267	1632	3168	24075	0.00019	0.04	LOC_Os10g11954	retrotransposon protein, putative, unclassified, expressed
D or OD	>=3	SBP	GO:0015074	P	DNA integration	267	1632	3168	24075	0.00019	0.04	LOC_Os11g24930	retrotransposon protein, putative, Ty3-gypsy subclass, expressed
D or OD	>=3	SBP	GO:0015074	P	DNA integration	267	1632	3168	24075	0.00019	0.04	LOC_Os03g15160	retrotransposon protein, putative, Ty3-gypsy subclass, expressed
D or OD	>=3	SBP	GO:0015074	P	DNA integration	267	1632	3168	24075	0.00019	0.04	LOC_Os07g22800	retrotransposon protein, putative, Ty1-copia subclass, expressed
D or OD	>=3	SBP	GO:0015074	P	DNA integration	267	1632	3168	24075	0.00019	0.04	LOC_Os07g24310	retrotransposon protein, putative, unclassified, expressed
D or OD	>=3	SBP	GO:0015074	P	DNA integration	267	1632	3168	24075	0.00019	0.04	LOC_Os04g29190	retrotransposon protein, putative, unclassified, expressed
D or OD	>=3	SBP	GO:0015074	P	DNA integration	267	1632	3168	24075	0.00019	0.04	LOC_Os01g42590	retrotransposon protein, putative, unclassified, expressed
D or OD	>=3	SBP	GO:0015074	P	DNA integration	267	1632	3168	24075	0.00019	0.04	LOC_Os06g39540	retrotransposon protein, putative, unclassified, expressed
D or OD	>=3	SBP	GO:0015074	P	DNA integration	267	1632	3168	24075	0.00019	0.04	LOC_Os04g05810	retrotransposon protein, putative, unclassified
D or OD	>=3	SBP	GO:0015074	P	DNA integration	267	1632	3168	24075	0.00019	0.04	LOC_Os01g23200	retrotransposon protein, putative, Ty3-gypsy subclass, expressed
D or OD	>=3	SBP	GO:0015074	P	DNA integration	267	1632	3168	24075	0.00019	0.04	LOC_Os11g18250	retrotransposon protein, putative, Ty3-gypsy subclass
D or OD	>=3	SBP	GO:0015074	P	DNA integration	267	1632	3168	24075	0.00019	0.04	LOC_Os08g24870	retrotransposon protein, putative, unclassified, expressed
D or OD	>=3	SBP	GO:0015074	P	DNA integration	267	1632	3168	24075	0.00019	0.04	LOC_Os08g09160	retrotransposon protein, putative, unclassified, expressed
D or OD	>=3	SBP	GO:0015074	P	DNA integration	267	1632	3168	24075	0.00019	0.04	LOC_Os03g39250	retrotransposon protein, putative, Ty3-gypsy subclass, expressed
D or OD	>=3	SBP	GO:0015074	P	DNA integration	267	1632	3168	24075	0.00019	0.04	LOC_Os03g33240	retrotransposon protein, putative, unclassified, expressed
D or OD	>=3	SBP	GO:0015074	P	DNA integration	267	1632	3168	24075	0.00019	0.04	LOC_Os09g19620	retrotransposon protein, putative, unclassified
D or OD	>=3	SBP	GO:0015074	P	DNA integration	267	1632	3168	24075	0.00019	0.04	LOC_Os07g25330	retrotransposon protein, putative, Ty3-gypsy subclass, expressed
D or OD	>=3	SBP	GO:0015074	P	DNA integration	267	1632	3168	24075	0.00019	0.04	LOC_Os04g04120	retrotransposon protein, putative, Ty1-copia subclass, expressed
D or OD	>=3	SBP	GO:0015074	P	DNA integration	267	1632	3168	24075	0.00019	0.04	LOC_Os10g12010	retrotransposon protein, putative, unclassified, expressed
D or OD	>=3	SBP	GO:0015074	P	DNA integration	267	1632	3168	24075	0.00019	0.04	LOC_Os01g23280	retrotransposon protein, putative, unclassified
D or OD	>=3	SBP	GO:0015074	P	DNA integration	267	1632	3168	24075	0.00019	0.04	LOC_Os07g24240	retrotransposon protein, putative, Ty3-gypsy subclass, expressed
D or OD	>=3	SBP	GO:0015074	P	DNA integration	267	1632	3168	24075	0.00019	0.04	LOC_Os10g11690	retrotransposon protein, putative, Ty3-gypsy subclass, expressed
D or OD	>=3	SBP	GO:0015074	P	DNA integration	267	1632	3168	24075	0.00019	0.04	LOC_Os07g23070	retrotransposon protein, putative, Ty3-gypsy subclass, expressed
D or OD	>=3	SBP	GO:0015074	P	DNA integration	267	1632	3168	24075	0.00019	0.04	LOC_Os01g23040	retrotransposon protein, putative, Ty3-gypsy subclass, expressed
D or OD	>=3	SBP	GO:0015074	P	DNA integration	267	1632	3168	24075	0.00019	0.04	LOC_Os12g34180	retrotransposon protein, putative, Ty3-gypsy subclass, expressed
D or OD	>=3	SBP	GO:0015074	P	DNA integration	267	1632	3168	24075	0.00019	0.04	LOC_Os04g04880	retrotransposon protein, putative, Ty3-gypsy subclass, expressed
D or OD	>=3	SBP	GO:0015074	P	DNA integration	267	1632	3168	24075	0.00019	0.04	LOC_Os07g24530	retrotransposon protein, putative, unclassified
D or OD	>=3	SBP	GO:0015074	P	DNA integration	267	1632	3168	24075	0.00019	0.04	LOC_Os04g29330	retrotransposon protein, putative, Ty3-gypsy subclass, expressed
D or OD	>=3	SBP	GO:0015074	P	DNA integration	267	1632	3168	24075	0.00019	0.04	LOC_Os04g04720	retrotransposon protein, putative, unclassified, expressed
D or OD	>=3	SBP	GO:0015074	P	DNA integration	267	1632	3168	24075	0.00019	0.04	LOC_Os09g13510	retrotransposon protein, putative, unclassified, expressed
D or OD	>=3	SBP	GO:0015074	P	DNA integration	267	1632	3168	24075	0.00019	0.04	LOC_Os04g05160	retrotransposon protein, putative, Ty3-gypsy subclass, expressed
D or OD	>=3	SBP	GO:0015074	P	DNA integration	267	1632	3168	24075	0.00019	0.04	LOC_Os04g06310	retrotransposon protein, putative, unclassified, expressed
D or OD	>=3	SBP	GO:0015074	P	DNA integration	267	1632	3168	24075	0.00019	0.04	LOC_Os12g15750	retrotransposon protein, putative, Ty3-gypsy subclass, expressed
D or OD	>=3	SBP	GO:0015074	P	DNA integration	267	1632	3168	24075	0.00019	0.04	LOC_Os01g59220	retrotransposon protein, putative, unclassified, expressed
D or OD	>=3	SBP	GO:0015074	P	DNA integration	267	1632	3168	24075	0.00019	0.04	LOC_Os12g16050	retrotransposon protein, putative, Ty3-gypsy subclass, expressed
D or OD	>=3	SBP	GO:0015074	P	DNA integration	267	1632	3168	24075	0.00019	0.04	LOC_Os08g26920	retrotransposon protein, putative, Ty3-gypsy subclass, expressed
D or OD	>=3	SBP	GO:0015074	P	DNA integration	267	1632	3168	24075	0.00019	0.04	LOC_Os01g23330	retrotransposon, putative, centromere-specific, expressed
D or OD	>=3	SBP	GO:0015074	P	DNA integration	267	1632	3168	24075	0.00019	0.04	LOC_Os06g37720	retrotransposon protein, putative, Ty3-gypsy subclass, expressed
D or OD	>=3	SBP	GO:0015074	P	DNA integration	267	1632	3168	24075	0.00019	0.04	LOC_Os06g39790	retrotransposon protein, putative, unclassified, expressed
D or OD	>=3	SBP	GO:0015074	P	DNA integration	267	1632	3168	24075	0.00019	0.04	LOC_Os08g25330	retrotransposon protein, putative, Ty3-gypsy subclass
D or OD	>=3	SBP	GO:0015074	P	DNA integration	267	1632	3168	24075	0.00019	0.04	LOC_Os02g44400	transposon protein, putative, unclassified, expressed
D or OD	>=3	SBP	GO:0015074	P	DNA integration	267	1632	3168	24075	0.00019	0.04	LOC_Os03g35326	retrotransposon protein, putative, unclassified, expressed
D or OD	>=3	SBP	GO:0015074	P	DNA integration	267	1632	3168	24075	0.00019	0.04	LOC_Os03g33230	retrotransposon protein, putative, unclassified, expressed
D or OD	>=3	SBP	GO:0015074	P	DNA integration	267	1632	3168	24075	0.00019	0.04	LOC_Os08g26910	retrotransposon protein, putative, Ty3-gypsy subclass, expressed
D or OD	>=3	SBP	GO:0015074	P	DNA integration	267	1632	3168	24075	0.00019	0.04	LOC_Os08g26970	retrotransposon protein, putative, unclassified, expressed
D or OD	>=3	SBP	GO:0015074	P	DNA integration	267	1632	3168	24075	0.00019	0.04	LOC_Os11g25070	retrotransposon protein, putative, unclassified, expressed
D or OD	>=3	SBP	GO:0015074	P	DNA integration	267	1632	3168	24075	0.00019	0.04	LOC_Os12g33000	retrotransposon protein, putative, unclassified, expressed
D or OD	>=3	SBP	GO:0015074	P	DNA integration	267	1632	3168	24075	0.00019	0.04	LOC_Os06g43460	retrotransposon protein, putative, unclassified, expressed
D or OD	>=3	SBP	GO:0015074	P	DNA integration	267	1632	3168	24075	0.00019	0.04	LOC_Os04g29380	retrotransposon protein, putative, unclassified, expressed
D or OD	>=3	SBP	GO:0015074	P	DNA integration	267	1632	3168	24075	0.00019	0.04	LOC_Os09g14690	retrotransposon protein, putative, unclassified, expressed
D or OD	>=3	SBP	GO:0015074	P	DNA integration	267	1632	3168	24075	0.00019	0.04	LOC_Os05g24850	retrotransposon protein, putative, Ty3-gypsy subclass
D or OD	>=3	SBP	GO:0015074	P	DNA integration	267	1632	3168	24075	0.00019	0.04	LOC_Os12g32440	retrotransposon protein, putative, Ty1-copia subclass
D or OD	>=3	SBP	GO:0015074	P	DNA integration	267	1632	3168	24075	0.00019	0.04	LOC_Os06g38400	retrotransposon protein, putative, Ty1-copia subclass, expressed
D or OD	>=3	SBP	GO:0015074	P	DNA integration	267	1632	3168	24075	0.00019	0.04	LOC_Os12g33370	retrotransposon protein, putative, Ty3-gypsy subclass
D or OD	>=3	SBP	GO:0015074	P	DNA integration	267	1632	3168	24075	0.00019	0.04	LOC_Os02g45040	retrotransposon protein, putative, unclassified, expressed
D or OD	>=3	SBP	GO:0015074	P	DNA integration	267	1632	3168	24075	0.00019	0.04	LOC_Os08g29540	retrotransposon protein, putative, unclassified, expressed
D or OD	>=3	SBP	GO:0015074	P	DNA integration	267	1632	3168	24075	0.00019	0.04	LOC_Os01g68410	retrotransposon protein, putative, Ty3-gypsy subclass, expressed
D or OD	>=3	SBP	GO:0015074	P	DNA integration	267	1632	3168	24075	0.00019	0.04	LOC_Os09g19290	retrotransposon protein, putative, unclassified, expressed
D or OD	>=3	SBP	GO:0015074	P	DNA integration	267	1632	3168	24075	0.00019	0.04	LOC_Os07g24740	retrotransposon protein, putative, Ty3-gypsy subclass, expressed
D or OD	>=3	SBP	GO:0015074	P	DNA integration	267	1632	3168	24075	0.00019	0.04	LOC_Os03g27140	retrotransposon protein, putative, unclassified, expressed
D or OD	>=3	SBP	GO:0015074	P	DNA integration	267	1632	3168	24075	0.00019	0.04	LOC_Os03g15140	retrotransposon protein, putative, unclassified, expressed
D or OD	>=3	SBP	GO:0015074	P	DNA integration	267	1632	3168	24075	0.00019	0.04	LOC_Os03g03250	retrotransposon protein, putative, Ty3-gypsy subclass, expressed
D or OD	>=3	SBP	GO:0015074	P	DNA integration	267	1632	3168	24075	0.00019	0.04	LOC_Os06g38010	retrotransposon protein, putative, Ty3-gypsy subclass, expressed
D or OD	>=3	SBP	GO:0015074	P	DNA integration	267	1632	3168	24075	0.00019	0.04	LOC_Os03g26750	retrotransposon protein, putative, Ty3-gypsy subclass, expressed
D or OD	>=3	SBP	GO:0015074	P	DNA integration	267	1632	3168	24075	0.00019	0.04	LOC_Os08g24990	retrotransposon protein, putative, Ty3-gypsy subclass, expressed
D or OD	>=3	SBP	GO:0015074	P	DNA integration	267	1632	3168	24075	0.00019	0.04	LOC_Os03g33328	retrotransposon protein, putative, Ty3-gypsy subclass, expressed
D or OD	>=3	SBP	GO:0015074	P	DNA integration	267	1632	3168	24075	0.00019	0.04	LOC_Os01g28760	retrotransposon protein, putative, Ty1-copia subclass, expressed
D or OD	>=3	SBP	GO:0015074	P	DNA integration	267	1632	3168	24075	0.00019	0.04	LOC_Os09g06800	retrotransposon protein, putative, Ty3-gypsy subclass, expressed
D or OD	>=3	SBP	GO:0015074	P	DNA integration	267	1632	3168	24075	0.00019	0.04	LOC_Os12g15630	retrotransposon protein, putative, unclassified, expressed
D or OD	>=3	SBP	GO:0015074	P	DNA integration	267	1632	3168	24075	0.00019	0.04	LOC_Os08g24730	retrotransposon protein, putative, unclassified, expressed
D or OD	>=3	SBP	GO:0015074	P	DNA integration	267	1632	3168	24075	0.00019	0.04	LOC_Os06g39020	retrotransposon protein, putative, unclassified, expressed
D or OD	>=3	SBP	GO:0015074	P	DNA integration	267	1632	3168	24075	0.00019	0.04	LOC_Os08g25220	retrotransposon protein, putative, unclassified, expressed
D or OD	>=3	SBP	GO:0015074	P	DNA integration	267	1632	3168	24075	0.00019	0.04	LOC_Os07g17440	retrotransposon protein, putative, Ty1-copia subclass, expressed
D or OD	>=3	SBP	GO:0015074	P	DNA integration	267	1632	3168	24075	0.00019	0.04	LOC_Os12g16060	retrotransposon protein, putative, Ty1-copia subclass, expressed
D or OD	>=3	SBP	GO:0015074	P	DNA integration	267	1632	3168	24075	0.00019	0.04	LOC_Os12g33910	retrotransposon protein, putative, Ty3-gypsy subclass, expressed
D or OD	>=3	SBP	GO:0015074	P	DNA integration	267	1632	3168	24075	0.00019	0.04	LOC_Os03g39350	retrotransposon protein, putative, Ty3-gypsy subclass, expressed
D or OD	>=3	SBP	GO:0015074	P	DNA integration	267	1632	3168	24075	0.00019	0.04	LOC_Os03g35560	retrotransposon protein, putative, Ty1-copia subclass, expressed
D or OD	>=3	SBP	GO:0015074	P	DNA integration	267	1632	3168	24075	0.00019	0.04	LOC_Os03g25890	retrotransposon protein, putative, unclassified, expressed
D or OD	>=3	SBP	GO:0015074	P	DNA integration	267	1632	3168	24075	0.00019	0.04	LOC_Os03g35390	retrotransposon protein, putative, unclassified, expressed
D or OD	>=3	SBP	GO:0015074	P	DNA integration	267	1632	3168	24075	0.00019	0.04	LOC_Os10g21950	retrotransposon protein, putative, Ty1-copia subclass, expressed
D or OD	>=3	SBP	GO:0015074	P	DNA integration	267	1632	3168	24075	0.00019	0.04	LOC_Os04g29520	retrotransposon protein, putative, unclassified, expressed
D or OD	>=3	SBP	GO:0015074	P	DNA integration	267	1632	3168	24075	0.00019	0.04	LOC_Os01g60220	transposon protein, putative, unclassified, expressed
D or OD	>=3	SBP	GO:0015074	P	DNA integration	267	1632	3168	24075	0.00019	0.04	LOC_Os07g25190	retrotransposon protein, putative, Ty3-gypsy subclass, expressed
D or OD	>=3	SBP	GO:0015074	P	DNA integration	267	1632	3168	24075	0.00019	0.04	LOC_Os06g43340	retrotransposon protein, putative, unclassified, expressed
D or OD	>=3	SBP	GO:0015074	P	DNA integration	267	1632	3168	24075	0.00019	0.04	LOC_Os01g58810	retrotransposon protein, putative, Ty1-copia subclass, expressed
D or OD	>=3	SBP	GO:0015074	P	DNA integration	267	1632	3168	24075	0.00019	0.04	LOC_Os10g11672	retrotransposon protein, putative, Ty3-gypsy subclass, expressed
D or OD	>=3	SBP	GO:0015074	P	DNA integration	267	1632	3168	24075	0.00019	0.04	LOC_Os03g34250	retrotransposon protein, putative, unclassified
D or OD	>=3	SBP	GO:0015074	P	DNA integration	267	1632	3168	24075	0.00019	0.04	LOC_Os04g04590	retrotransposon protein, putative, Ty3-gypsy subclass, expressed
D or OD	>=3	SBP	GO:0015074	P	DNA integration	267	1632	3168	24075	0.00019	0.04	LOC_Os01g58920	retrotransposon protein, putative, Ty3-gypsy subclass, expressed
D or OD	>=3	SBP	GO:0015074	P	DNA integration	267	1632	3168	24075	0.00019	0.04	LOC_Os02g44136	retrotransposon protein, putative, Ty1-copia subclass, expressed
D or OD	>=3	SBP	GO:0015074	P	DNA integration	267	1632	3168	24075	0.00019	0.04	LOC_Os08g24650	retrotransposon protein, putative, Ty3-gypsy subclass, expressed
D or OD	>=3	SBP	GO:0015074	P	DNA integration	267	1632	3168	24075	0.00019	0.04	LOC_Os03g34140	retrotransposon protein, putative, Ty1-copia subclass
D or OD	>=3	SBP	GO:0015074	P	DNA integration	267	1632	3168	24075	0.00019	0.04	LOC_Os06g43290	retrotransposon protein, putative, Ty1-copia subclass, expressed
D or OD	>=3	SBP	GO:0015074	P	DNA integration	267	1632	3168	24075	0.00019	0.04	LOC_Os03g39400	retrotransposon protein, putative, Ty1-copia subclass, expressed
D or OD	>=3	SBP	GO:0015074	P	DNA integration	267	1632	3168	24075	0.00019	0.04	LOC_Os03g34170	retrotransposon protein, putative, unclassified, expressed
D or OD	>=3	SBP	GO:0015074	P	DNA integration	267	1632	3168	24075	0.00019	0.04	LOC_Os07g24340	retrotransposon protein, putative, Ty1-copia subclass, expressed
D or OD	>=3	SBP	GO:0015074	P	DNA integration	267	1632	3168	24075	0.00019	0.04	LOC_Os07g38320	retrotransposon protein, putative, Ty3-gypsy subclass
D or OD	>=3	SBP	GO:0015074	P	DNA integration	267	1632	3168	24075	0.00019	0.04	LOC_Os04g06330	retrotransposon, putative, centromere-specific
D or OD	>=3	SBP	GO:0015074	P	DNA integration	267	1632	3168	24075	0.00019	0.04	LOC_Os08g25110	transposon protein, putative, unclassified, expressed
D or OD	>=3	SBP	GO:0015074	P	DNA integration	267	1632	3168	24075	0.00019	0.04	LOC_Os04g05730	retrotransposon protein, putative, Ty3-gypsy subclass, expressed
D or OD	>=3	SBP	GO:0015074	P	DNA integration	267	1632	3168	24075	0.00019	0.04	LOC_Os04g04510	retrotransposon protein, putative, Ty3-gypsy subclass, expressed
D or OD	>=3	SBP	GO:0015074	P	DNA integration	267	1632	3168	24075	0.00019	0.04	LOC_Os06g42980	retrotransposon protein, putative, unclassified, expressed
D or OD	>=3	SBP	GO:0015074	P	DNA integration	267	1632	3168	24075	0.00019	0.04	LOC_Os03g33640	retrotransposon protein, putative, Ty1-copia subclass, expressed
D or OD	>=3	SBP	GO:0015074	P	DNA integration	267	1632	3168	24075	0.00019	0.04	LOC_Os10g22210	retrotransposon protein, putative, unclassified, expressed
D or OD	>=3	SBP	GO:0015074	P	DNA integration	267	1632	3168	24075	0.00019	0.04	LOC_Os07g38350	retrotransposon protein, putative, Ty1-copia subclass, expressed
D or OD	>=3	SBP	GO:0015074	P	DNA integration	267	1632	3168	24075	0.00019	0.04	LOC_Os12g32800	retrotransposon protein, putative, Ty3-gypsy subclass, expressed
D or OD	>=3	SBP	GO:0015074	P	DNA integration	267	1632	3168	24075	0.00019	0.04	LOC_Os07g17620	retrotransposon protein, putative, Ty3-gypsy subclass, expressed
D or OD	>=3	SBP	GO:0015074	P	DNA integration	267	1632	3168	24075	0.00019	0.04	LOC_Os04g04940	retrotransposon protein, putative, unclassified, expressed
D or OD	>=3	SBP	GO:0015074	P	DNA integration	267	1632	3168	24075	0.00019	0.04	LOC_Os04g06080	retrotransposon protein, putative, Ty3-gypsy subclass, expressed
D or OD	>=3	SBP	GO:0015074	P	DNA integration	267	1632	3168	24075	0.00019	0.04	LOC_Os01g11450	retrotransposon protein, putative, Ty1-copia subclass, expressed
D or OD	>=3	SBP	GO:0015074	P	DNA integration	267	1632	3168	24075	0.00019	0.04	LOC_Os06g38220	retrotransposon protein, putative, unclassified
D or OD	>=3	SBP	GO:0015074	P	DNA integration	267	1632	3168	24075	0.00019	0.04	LOC_Os07g17480	retrotransposon protein, putative, unclassified
D or OD	>=3	SBP	GO:0015074	P	DNA integration	267	1632	3168	24075	0.00019	0.04	LOC_Os11g25350	retrotransposon protein, putative, unclassified
D or OD	>=3	SBP	GO:0015074	P	DNA integration	267	1632	3168	24075	0.00019	0.04	LOC_Os10g11702	retrotransposon protein, putative, Ty3-gypsy subclass, expressed
D or OD	>=3	SBP	GO:0015074	P	DNA integration	267	1632	3168	24075	0.00019	0.04	LOC_Os07g25340	retrotransposon protein, putative, unclassified, expressed
D or OD	>=3	SBP	GO:0015074	P	DNA integration	267	1632	3168	24075	0.00019	0.04	LOC_Os06g39930	retrotransposon protein, putative, unclassified, expressed
D or OD	>=3	SBP	GO:0015074	P	DNA integration	267	1632	3168	24075	0.00019	0.04	LOC_Os07g23040	retrotransposon protein, putative, unclassified, expressed
D or OD	>=3	SBP	GO:0015074	P	DNA integration	267	1632	3168	24075	0.00019	0.04	LOC_Os03g33880	retrotransposon protein, putative, unclassified, expressed
D or OD	>=3	SBP	GO:0015074	P	DNA integration	267	1632	3168	24075	0.00019	0.04	LOC_Os07g23220	retrotransposon protein, putative, unclassified, expressed
D or OD	>=3	SBP	GO:0015074	P	DNA integration	267	1632	3168	24075	0.00019	0.04	LOC_Os02g44124	retrotransposon protein, putative, unclassified, expressed
D or OD	>=3	SBP	GO:0015074	P	DNA integration	267	1632	3168	24075	0.00019	0.04	LOC_Os07g24110	retrotransposon protein, putative, Ty1-copia subclass, expressed
D or OD	>=3	SBP	GO:0015074	P	DNA integration	267	1632	3168	24075	0.00019	0.04	LOC_Os07g24690	retrotransposon protein, putative, unclassified, expressed
D or OD	>=3	SBP	GO:0015074	P	DNA integration	267	1632	3168	24075	0.00019	0.04	LOC_Os07g24440	retrotransposon protein, putative, Ty3-gypsy subclass, expressed
D or OD	>=3	SBP	GO:0015074	P	DNA integration	267	1632	3168	24075	0.00019	0.04	LOC_Os12g32420	retrotransposon protein, putative, unclassified, expressed
D or OD	>=3	SBP	GO:0015074	P	DNA integration	267	1632	3168	24075	0.00019	0.04	LOC_Os07g33260	transposon protein, putative, unclassified, expressed
D or OD	>=3	SBP	GO:0015074	P	DNA integration	267	1632	3168	24075	0.00019	0.04	LOC_Os08g29490	retrotransposon protein, putative, unclassified, expressed
D or OD	>=3	SBP	GO:0015074	P	DNA integration	267	1632	3168	24075	0.00019	0.04	LOC_Os06g38030	retrotransposon protein, putative, Ty3-gypsy subclass, expressed
D or OD	>=3	SBP	GO:0015074	P	DNA integration	267	1632	3168	24075	0.00019	0.04	LOC_Os12g34090	retrotransposon protein, putative, Ty3-gypsy subclass, expressed
D or OD	>=3	SBP	GO:0015074	P	DNA integration	267	1632	3168	24075	0.00019	0.04	LOC_Os08g24570	retrotransposon protein, putative, Ty3-gypsy subclass, expressed
D or OD	>=3	SBP	GO:0015074	P	DNA integration	267	1632	3168	24075	0.00019	0.04	LOC_Os08g39174	retrotransposon protein, putative, Ty1-copia subclass, expressed
D or OD	>=3	SBP	GO:0015074	P	DNA integration	267	1632	3168	24075	0.00019	0.04	LOC_Os03g26390	retrotransposon protein, putative, Ty3-gypsy subclass, expressed
D or OD	>=3	SBP	GO:0015074	P	DNA integration	267	1632	3168	24075	0.00019	0.04	LOC_Os12g15650	retrotransposon protein, putative, Ty3-gypsy subclass, expressed
D or OD	>=3	SBP	GO:0015074	P	DNA integration	267	1632	3168	24075	0.00019	0.04	LOC_Os06g47810	retrotransposon protein, putative, Ty1-copia subclass, expressed
D or OD	>=3	SBP	GO:0015074	P	DNA integration	267	1632	3168	24075	0.00019	0.04	LOC_Os07g38340	retrotransposon protein, putative, Ty3-gypsy subclass, expressed
D or OD	>=3	SBP	GO:0015074	P	DNA integration	267	1632	3168	24075	0.00019	0.04	LOC_Os03g33530	retrotransposon protein, putative, unclassified, expressed
D or OD	>=3	SBP	GO:0015074	P	DNA integration	267	1632	3168	24075	0.00019	0.04	LOC_Os12g15780	retrotransposon protein, putative, unclassified, expressed
D or OD	>=3	SBP	GO:0015074	P	DNA integration	267	1632	3168	24075	0.00019	0.04	LOC_Os08g24270	retrotransposon protein, putative, Ty3-gypsy subclass, expressed
D or OD	>=3	SBP	GO:0015074	P	DNA integration	267	1632	3168	24075	0.00019	0.04	LOC_Os07g23460	retrotransposon protein, putative, Ty1-copia subclass, expressed
D or OD	>=3	SBP	GO:0015074	P	DNA integration	267	1632	3168	24075	0.00019	0.04	LOC_Os07g24590	retrotransposon protein, putative, unclassified, expressed
D or OD	>=3	SBP	GO:0015074	P	DNA integration	267	1632	3168	24075	0.00019	0.04	LOC_Os02g44190	retrotransposon protein, putative, Ty3-gypsy subclass
D or OD	>=3	SBP	GO:0015074	P	DNA integration	267	1632	3168	24075	0.00019	0.04	LOC_Os01g23470	retrotransposon protein, putative, Ty1-copia subclass, expressed
D or OD	>=3	SBP	GO:0015074	P	DNA integration	267	1632	3168	24075	0.00019	0.04	LOC_Os07g24970	retrotransposon protein, putative, Ty3-gypsy subclass, expressed
D or OD	>=3	SBP	GO:0015074	P	DNA integration	267	1632	3168	24075	0.00019	0.04	LOC_Os07g23400	retrotransposon protein, putative, Ty1-copia subclass, expressed
D or OD	>=3	SBP	GO:0015074	P	DNA integration	267	1632	3168	24075	0.00019	0.04	LOC_Os06g39920	retrotransposon protein, putative, unclassified, expressed
D or OD	>=3	SBP	GO:0015074	P	DNA integration	267	1632	3168	24075	0.00019	0.04	LOC_Os06g38820	retrotransposon protein, putative, Ty1-copia subclass, expressed
D or OD	>=3	SBP	GO:0015074	P	DNA integration	267	1632	3168	24075	0.00019	0.04	LOC_Os04g06610	retrotransposon protein, putative, Ty3-gypsy subclass, expressed
D or OD	>=3	SBP	GO:0015074	P	DNA integration	267	1632	3168	24075	0.00019	0.04	LOC_Os06g49940	retrotransposon protein, putative, unclassified, expressed
D or OD	>=3	SBP	GO:0015074	P	DNA integration	267	1632	3168	24075	0.00019	0.04	LOC_Os04g29130	retrotransposon protein, putative, unclassified
[truncated: 12,232 more rows]
